# Supplementary material for: Suppression of IFN-Induced Transcription Underlies IFN Defects Generated by Activated Ras/MEK in Human Cancer Cells
Source: PLoS One. 2012 Sep 7;7(9):e44267. doi: 10.1371/journal.pone.0044267 (PMC3436881; doi:10.1371/journal.pone.0044267)
Supplement: File S1 — Differentially expressed genes in HT1080 cells treated with IFN for 6 h compared to vehicle treated controls (FDR <0.01). (XLS) [file pone.0044267.s006.xls]

## Sheet: ttI6p01
ID	logFC	FC	AveExpr	t	P.Value	adj.P.Val	B	Gene Symbol	Gene Title	GO Description
7937335	4.9766	31.4852	9.81198	20.8071	8.903e-15	2.96443e-10	19.4968	IFITM1	interferon induced transmembrane protein 1 (9-27)	receptor signaling protein activity /// protein binding /// plasma membrane /// cell surface receptor linked signaling pathway /// negative regulation of cell proliferation /// response to biotic stimulus /// integral to membrane /// cell surface receptor linked signal transduction
7902541	4.91299	30.1271	8.24287	13.3938	2.75452e-11	7.6516e-08	14.3803	IFI44L	interferon-induced protein 44-like	cytoplasm /// immune response
8068697	4.64769	25.0665	8.63175	14.8255	4.50526e-12	3.00023e-08	15.6718	MX2	myxovirus (influenza virus) resistance 2 (mouse)	nucleotide binding /// GTPase activity /// GTP binding /// nucleus /// cytoplasm /// defense response /// response to virus /// GTPase activity /// cytoplasm
7958913	4.17535	18.0678	9.96456	10.9621	8.82393e-10	1.27744e-06	11.7121	OAS2	2'-5'-oligoadenylate synthetase 2, 69/71kDa	nucleotide binding /// 2'-5'-oligoadenylate synthetase activity /// RNA binding /// ATP binding /// nucleus /// mitochondrion /// endoplasmic reticulum /// microsome /// nucleobase, nucleoside, nucleotide and nucleic acid metabolic process /// RNA catabolic process /// immune response /// membrane /// transferase activity /// nucleotidyltransferase activity /// microsome
8068713	4.06913	16.7853	9.45938	16.139	9.6992e-13	1.61477e-08	16.7068	MX1	myxovirus (influenza virus) resistance 1, interferon-inducible protein p78 (mouse)	nucleotide binding /// GTPase activity /// protein binding /// GTP binding /// cytoplasm /// cytosol /// induction of apoptosis /// defense response /// signal transduction /// response to virus /// GTP binding
7958884	3.48368	11.1864	10.258	12.6985	7.032e-11	1.7128e-07	13.6831	OAS1	2',5'-oligoadenylate synthetase 1, 40/46kDa	nucleotide binding /// RNA binding /// ATP binding /// nucleus /// cytoplasm /// mitochondrion /// endoplasmic reticulum /// microsome /// nucleobase, nucleoside, nucleotide and nucleic acid metabolic process /// immune response /// transferase activity /// nucleotidyltransferase activity
7929065	3.42743	10.7587	11.0389	5.50059	2.40563e-05	0.0081735	2.77852	IFIT1	interferon-induced protein with tetratricopeptide repeats 1	molecular_function /// binding /// cytoplasm /// biological_process
8074606	3.26209	9.5937	10.6712	13.9963	1.26192e-11	5.25225e-08	14.9463	USP18 /// USP41	ubiquitin specific peptidase 18 /// ubiquitin specific peptidase 41	ubiquitin thiolesterase activity /// ubiquitin-specific protease activity /// nucleus /// ubiquitin-dependent protein catabolic process /// peptidase activity /// cysteine-type peptidase activity /// nucleus
7914127	3.21729	9.30041	12.0912	6.44559	3.12115e-06	0.00126835	4.65265	IFI6	interferon, alpha-inducible protein 6	release of cytochrome c from mitochondria /// protein binding /// mitochondrion /// anti-apoptosis /// immune response /// membrane /// integral to membrane /// negative regulation of caspase activity /// negative regulation of mitochondrial depolarization
7976443	2.83067	7.11402	9.90699	6.26228	4.59816e-06	0.00180124	4.29924	IFI27	interferon, alpha-inducible protein 27	molecular_function /// biological_process /// membrane /// integral to membrane
8071155	2.74731	6.71464	9.72424	15.5295	1.95078e-12	2.16518e-08	16.243	USP18	ubiquitin specific peptidase 18	ubiquitin thiolesterase activity /// ubiquitin-specific protease activity /// nucleus /// ubiquitin-dependent protein catabolic process /// peptidase activity /// cysteine-type peptidase activity /// nucleus
8035304	2.73249	6.64602	7.39655	8.62062	4.42789e-08	3.20512e-05	8.43933	BST2 /// BST2	bone marrow stromal cell antigen 2 /// bone marrow stromal cell antigen 2	signal transducer activity /// Golgi apparatus /// plasma membrane /// integral to plasma membrane /// humoral immune response /// cell-cell signaling /// multicellular organismal development /// cell proliferation /// response to virus /// anchored to membrane /// B cell activation /// positive regulation of I-kappaB kinase/NF-kappaB cascade /// Golgi apparatus /// plasma membrane
7958895	2.49607	5.64148	9.90453	13.393	2.75758e-11	7.6516e-08	14.3795	OAS3	2'-5'-oligoadenylate synthetase 3, 100kDa	nucleotide binding /// RNA binding /// ATP binding /// microsome /// nucleobase, nucleoside, nucleotide and nucleic acid metabolic process /// immune response /// transferase activity /// nucleotidyltransferase activity
8096335	2.47051	5.54239	9.84174	14.282	8.79959e-12	4.18571e-08	15.203	HERC6	hect domain and RLD 6	intracellular /// cytoplasm /// cytosol /// protein modification process /// ligase activity /// acid-amino acid ligase activity /// modification-dependent protein catabolic process
8140971	2.41143	5.32001	9.86745	8.29653	8.02201e-08	5.34218e-05	7.92287	SAMD9L	sterile alpha motif domain containing 9-like	---
8090018	2.40332	5.29018	9.63711	12.023	1.81895e-10	3.36476e-07	12.9574	PARP9	poly (ADP-ribose) polymerase family, member 9	NAD+ ADP-ribosyltransferase activity /// protein binding /// nucleus /// nucleus /// cytoplasm /// cell migration /// transferase activity /// molecular_function
8056285	2.39596	5.26328	8.66255	9.7366	6.32718e-09	6.83367e-06	10.0958	IFIH1	interferon induced with helicase C domain 1	nucleotide binding /// DNA binding /// RNA binding /// helicase activity /// protein binding /// ATP binding /// intracellular /// nucleus /// cytoplasm /// zinc ion binding /// response to virus /// hydrolase activity /// regulation of apoptosis /// interspecies interaction between organisms /// innate immune response /// metal ion binding
8103563	2.36157	5.13929	9.61208	6.96474	1.06704e-06	0.000507562	5.62522	DDX60	DEAD (Asp-Glu-Ala-Asp) box polypeptide 60	nucleotide binding /// RNA binding /// helicase activity /// ATP binding /// ATP-dependent helicase activity /// hydrolase activity
8007446	2.29952	4.92293	10.689	12.6812	7.2016e-11	1.7128e-07	13.6652	IFI35	interferon-induced protein 35	protein binding /// nucleus /// immune response /// response to virus
8101131	2.24499	4.74032	5.94756	7.40806	4.39123e-07	0.000232087	6.4217	CXCL11	chemokine (C-X-C motif) ligand 11	extracellular region /// extracellular space /// chemotaxis /// inflammatory response /// immune response /// signal transduction /// G-protein coupled receptor protein signaling pathway /// cell-cell signaling /// chemokine activity /// extracellular region /// chemotaxis /// inflammatory response /// chemokine activity
8096361	1.90282	3.73945	6.96674	9.01501	2.18768e-08	1.69403e-05	9.04594	HERC5	hect domain and RLD 5	regulation of cyclin-dependent protein kinase activity /// intracellular /// cytoplasm /// protein modification process /// ligase activity /// acid-amino acid ligase activity /// perinuclear region of cytoplasm /// modification-dependent protein catabolic process
8082100	1.84422	3.5906	10.4134	13.7702	1.68581e-11	6.23692e-08	14.7379	PARP14	poly (ADP-ribose) polymerase family, member 14	NAD+ ADP-ribosyltransferase activity /// nucleus /// cytoplasm /// plasma membrane /// transferase activity, transferring glycosyl groups /// regulation of transcription /// protein binding /// cytoplasm
8066117	1.83217	3.56072	10.489	9.55861	8.54261e-09	7.68765e-06	9.84387	C20orf118 /// SAMHD1	chromosome 20 open reading frame 118 /// SAM domain and HD domain 1	intracellular /// nucleus /// immune response /// hydrolase activity /// regulation of innate immune response /// defense response to virus /// catalytic activity
8057744	1.79761	3.47645	11.7389	14.5578	6.24883e-12	3.46779e-08	15.444	STAT1	signal transducer and activator of transcription 1, 91kDa	DNA binding /// transcription factor activity /// signal transducer activity /// hematopoietin/interferon-class (D200-domain) cytokine receptor signal transducer activity /// calcium ion binding /// protein binding /// nucleus /// nucleolus /// cytoplasm /// regulation of transcription, DNA-dependent /// transcription from RNA polymerase II promoter /// induction of apoptosis /// activation of ca…
8140967	1.74871	3.36059	10.3795	7.34207	5.00326e-07	0.000260302	6.30515	SAMD9	sterile alpha motif domain containing 9	cytoplasm
7938035	1.74745	3.35765	9.72737	9.03456	2.11361e-08	1.69403e-05	9.0754	TRIM22	tripartite motif-containing 22	transcription factor activity /// transcription corepressor activity /// protein binding /// intracellular /// nucleus /// cytoplasm /// Golgi apparatus /// regulation of transcription, DNA-dependent /// immune response /// zinc ion binding /// response to virus /// Cajal body /// nuclear speck /// ligase activity /// intracellular membrane-bounded organelle /// interspecies interaction between o…
7917516	1.70077	3.25074	10.9224	10.262	2.66446e-09	3.6966e-06	10.8135	GBP3 /// GBP1	guanylate binding protein 3 /// guanylate binding protein 1, interferon-inducible, 67kDa	nucleotide binding /// GTPase activity /// GTP binding /// plasma membrane /// membrane /// integral to membrane /// immune response /// GTP binding
8015511	1.6614	3.16324	8.5511	8.16468	1.02558e-07	6.44314e-05	7.70807	DHX58	DEXH (Asp-Glu-X-His) box polypeptide 58	nucleotide binding /// DNA binding /// RNA binding /// helicase activity /// protein binding /// ATP binding /// cytoplasm /// zinc ion binding /// hydrolase activity /// innate immune response /// metal ion binding /// ATP-dependent helicase activity
8103601	1.6284	3.09171	9.29266	9.91048	4.7358e-09	5.84029e-06	10.3375	DDX60L	DEAD (Asp-Glu-Ala-Asp) box polypeptide 60-like	nucleotide binding /// RNA binding /// helicase activity /// ATP binding /// ATP-dependent helicase activity /// hydrolase activity
8118571	1.59617	3.02339	9.75956	11.6488	3.13541e-10	4.97142e-07	12.5334	PSMB9	proteasome (prosome, macropain) subunit, beta type, 9 (large multifunctional peptidase 2)	proteasome complex /// threonine-type endopeptidase activity /// nucleus /// cytoplasm /// proteasome core complex /// immune response /// peptidase activity /// antigen processing and presentation /// anaphase-promoting complex-dependent proteasomal ubiquitin-dependent protein catabolic process /// interspecies interaction between organisms /// negative regulation of ubiquitin-protein ligase act…
8178211	1.59617	3.02339	9.75956	11.6488	3.13541e-10	4.97142e-07	12.5334	PSMB9	proteasome (prosome, macropain) subunit, beta type, 9 (large multifunctional peptidase 2)	proteasome complex /// threonine-type endopeptidase activity /// nucleus /// cytoplasm /// proteasome core complex /// immune response /// peptidase activity /// antigen processing and presentation /// anaphase-promoting complex-dependent proteasomal ubiquitin-dependent protein catabolic process /// interspecies interaction between organisms /// negative regulation of ubiquitin-protein ligase act…
8179495	1.59617	3.02339	9.75956	11.6488	3.13541e-10	4.97142e-07	12.5334	PSMB9	proteasome (prosome, macropain) subunit, beta type, 9 (large multifunctional peptidase 2)	proteasome complex /// threonine-type endopeptidase activity /// nucleus /// cytoplasm /// proteasome core complex /// immune response /// peptidase activity /// antigen processing and presentation /// anaphase-promoting complex-dependent proteasomal ubiquitin-dependent protein catabolic process /// interspecies interaction between organisms /// negative regulation of ubiquitin-protein ligase act…
7969129	1.56529	2.95936	8.09759	8.72962	3.63672e-08	2.69093e-05	8.60937	PHF11	PHD finger protein 11	protein binding /// nucleus /// zinc ion binding /// regulation of transcription /// metal ion binding
8086125	1.53125	2.89035	8.64445	6.56181	2.44687e-06	0.00107202	4.87406	LBA1 /// TRANK1	lupus brain antigen 1 /// tetratricopeptide repeat and ankyrin repeat containing 1	DNA binding /// ATP-dependent DNA helicase activity /// binding /// ATP binding /// DNA repair
8143327	1.51949	2.8669	9.6452	11.5144	3.8255e-10	5.7899e-07	12.3771	PARP12	poly (ADP-ribose) polymerase family, member 12	nucleic acid binding /// NAD+ ADP-ribosyltransferase activity /// nucleus /// zinc ion binding /// transferase activity /// metal ion binding
8059650	1.5087	2.84553	10.1086	14.8637	4.30134e-12	3.00023e-08	15.7038	SP110	SP110 nuclear body protein	DNA binding /// hematopoietin/interferon-class (D200-domain) cytokine receptor signal transducer activity /// protein binding /// nucleus /// zinc ion binding /// interspecies interaction between organisms /// regulation of transcription /// metal ion binding /// DNA binding /// nucleus
8046003	1.50309	2.83449	6.82925	6.87942	1.26975e-06	0.000595475	5.46831	GCA	grancalcin, EF-hand calcium binding protein	calcium ion binding /// cytoplasm /// plasma membrane /// cellular membrane fusion /// protein homodimerization activity /// calcium ion binding /// cytoplasm /// membrane fusion
8091327	1.4351	2.70401	10.9819	13.544	2.26164e-11	7.5306e-08	14.5245	PLSCR1	phospholipid scramblase 1	calcium ion binding /// protein binding /// plasma membrane /// response to virus /// integral to membrane /// phospholipid scrambling /// SH3 domain binding /// phospholipid scramblase activity /// platelet activation
7973618	1.43274	2.69959	9.63831	7.65425	2.7128e-07	0.00014569	6.85035	IRF9	interferon regulatory factor 9	transcription factor activity /// protein binding /// nucleus /// cytoplasm /// regulation of transcription, DNA-dependent /// transcription from RNA polymerase II promoter /// cell surface receptor linked signaling pathway /// response to virus /// identical protein binding /// type I interferon biosynthetic process /// transcription factor activity /// nucleus /// cytoplasm /// cell surface rec…
8125512	1.4315	2.69727	10.2463	9.64075	7.43394e-09	6.87578e-06	9.96069	TAP1	transporter 1, ATP-binding cassette, sub-family B (MDR/TAP)	nucleotide binding /// transporter activity /// protein binding /// ATP binding /// endoplasmic reticulum /// endoplasmic reticulum lumen /// endoplasmic reticulum membrane /// cytosol /// protein complex assembly /// intracellular protein transport /// defense response /// immune response /// peptide transporter activity /// peptide antigen-transporting ATPase activity /// peptide transport /// …
8178867	1.4315	2.69727	10.2463	9.64075	7.43394e-09	6.87578e-06	9.96069	TAP1	transporter 1, ATP-binding cassette, sub-family B (MDR/TAP)	nucleotide binding /// transporter activity /// protein binding /// ATP binding /// endoplasmic reticulum /// endoplasmic reticulum lumen /// endoplasmic reticulum membrane /// cytosol /// protein complex assembly /// intracellular protein transport /// defense response /// immune response /// peptide transporter activity /// peptide antigen-transporting ATPase activity /// peptide transport /// …
8180061	1.4315	2.69727	10.2463	9.64075	7.43394e-09	6.87578e-06	9.96069	TAP1	transporter 1, ATP-binding cassette, sub-family B (MDR/TAP)	nucleotide binding /// transporter activity /// protein binding /// ATP binding /// endoplasmic reticulum /// endoplasmic reticulum lumen /// endoplasmic reticulum membrane /// cytosol /// protein complex assembly /// intracellular protein transport /// defense response /// immune response /// peptide transporter activity /// peptide antigen-transporting ATPase activity /// peptide transport /// …
8004184	1.40074	2.64037	7.42171	7.29298	5.51534e-07	0.000278824	6.21799	XAF1	XIAP associated factor 1	nucleus /// cytoplasm /// mitochondrion /// apoptosis /// zinc ion binding /// metal ion binding
8051501	1.3981	2.63553	11.1401	10.13	3.30126e-09	4.22777e-06	10.6368	EIF2AK2	eukaryotic translation initiation factor 2-alpha kinase 2	nucleotide binding /// double-stranded RNA binding /// protein serine/threonine kinase activity /// eukaryotic translation initiation factor 2alpha kinase activity /// protein binding /// ATP binding /// intracellular /// translation /// protein amino acid phosphorylation /// virus-infected cell apoptosis /// negative regulation of cell proliferation /// protein phosphatase type 2A regulator acti…
8124911	1.39182	2.62409	11.3341	8.78493	3.29299e-08	2.49197e-05	8.69494	HLA-C /// HLA-B	major histocompatibility complex, class I, C /// major histocompatibility complex, class I, B	antigen processing and presentation of peptide antigen via MHC class I /// protein binding /// membrane fraction /// plasma membrane /// integral to plasma membrane /// defense response /// immune response /// immune response /// membrane /// integral to membrane /// antigen processing and presentation /// MHC class I receptor activity /// MHC class I protein complex /// interspecies interaction …
8178498	1.35958	2.5661	11.4535	9.41338	1.0944e-08	9.5895e-06	9.63495	HLA-C /// HLA-B	major histocompatibility complex, class I, C /// major histocompatibility complex, class I, B	antigen processing and presentation of peptide antigen via MHC class I /// protein binding /// membrane fraction /// plasma membrane /// integral to plasma membrane /// defense response /// immune response /// immune response /// membrane /// integral to membrane /// antigen processing and presentation /// MHC class I receptor activity /// MHC class I protein complex /// interspecies interaction …
8179731	1.3553	2.5585	11.5345	9.71438	6.56749e-09	6.83367e-06	10.0646	---	---	---
7896817	1.33221	2.51787	8.63041	7.65905	2.68768e-07	0.00014569	6.8586	ISG15	ISG15 ubiquitin-like modifier	protein binding /// extracellular region /// extracellular space /// cytoplasm /// cell-cell signaling /// response to virus /// modification-dependent protein catabolic process /// protein tag /// ISG15-protein conjugation /// interspecies interaction between organisms /// protein binding
7964119	1.32694	2.50869	9.71136	7.70176	2.47434e-07	0.000142048	6.93194	STAT2	signal transducer and activator of transcription 2, 113kDa	transcription factor activity /// signal transducer activity /// hematopoietin/interferon-class (D200-domain) cytokine receptor signal transducer activity /// calcium ion binding /// protein binding /// nucleus /// cytoplasm /// regulation of transcription from RNA polymerase II promoter /// signal transduction /// JAK-STAT cascade /// response to virus /// interspecies interaction between organi…
8013450	1.31957	2.49592	7.95345	8.06214	1.24346e-07	7.66731e-05	7.53909	LGALS9C /// LGALS9B /// LGALS9	lectin, galactoside-binding, soluble, 9C /// lectin, galactoside-binding, soluble, 9B /// lectin, galactoside-binding, soluble, 9	signal transducer activity /// sugar binding /// galactose binding /// extracellular region /// cytoplasm /// positive regulation of I-kappaB kinase/NF-kappaB cascade
8098611	1.31567	2.48918	9.48358	6.44872	3.10065e-06	0.00126835	4.65865	TLR3	toll-like receptor 3	microglial cell activation during immune response /// double-stranded RNA binding /// double-stranded RNA binding /// receptor activity /// transmembrane receptor activity /// protein binding /// cytoplasm /// endosome /// endoplasmic reticulum /// endoplasmic reticulum membrane /// integral to plasma membrane /// hyperosmotic response /// signal transduction /// activation of NF-kappaB-inducing …
7948274	1.30799	2.47596	10.143	9.12128	1.81514e-08	1.54971e-05	9.20538	UBE2L6	ubiquitin-conjugating enzyme E2L 6	ubiquitin-protein ligase activity /// protein binding /// protein modification process /// ligase activity /// modification-dependent protein catabolic process /// ISG15-protein conjugation /// ISG15 ligase activity /// regulation of protein metabolic process /// ubiquitin-protein ligase activity /// post-translational protein modification
8082075	1.21122	2.31534	10.884	8.49932	5.5221e-08	3.83061e-05	8.24795	DTX3L /// PARP9	deltex 3-like (Drosophila) /// poly (ADP-ribose) polymerase family, member 9	NAD+ ADP-ribosyltransferase activity /// protein binding /// nucleus /// nucleus /// cytoplasm /// cell migration /// transferase activity /// ubiquitin-protein ligase activity /// response to DNA damage stimulus /// zinc ion binding /// histone monoubiquitination /// chromatin modification /// ligase activity /// histone binding /// metal ion binding /// protein binding
8178489	1.20666	2.30803	11.0139	10.192	2.9844e-09	3.97486e-06	10.7201	---	---	---
8094259	1.20179	2.30025	10.3032	8.32339	7.63251e-08	5.18653e-05	7.9663	LAP3	leucine aminopeptidase 3	magnesium ion binding /// aminopeptidase activity /// intracellular /// cytoplasm /// mitochondrion /// proteolysis /// peptidase activity /// metalloexopeptidase activity /// zinc ion binding /// manganese ion binding /// protein metabolic process
8124901	1.18682	2.27651	11.0075	9.83983	5.32513e-09	6.18425e-06	10.2398	HLA-C /// HLA-B	major histocompatibility complex, class I, C /// major histocompatibility complex, class I, B	antigen processing and presentation of peptide antigen via MHC class I /// protein binding /// membrane fraction /// plasma membrane /// integral to plasma membrane /// defense response /// immune response /// immune response /// membrane /// integral to membrane /// antigen processing and presentation /// MHC class I receptor activity /// MHC class I protein complex /// interspecies interaction …
8177717	1.16485	2.2421	8.50101	12.0607	1.72326e-10	3.36476e-07	12.9992	HLA-F	major histocompatibility complex, class I, F	antigen processing and presentation of peptide antigen via MHC class I /// immune response /// membrane /// integral to membrane /// antigen processing and presentation /// MHC class I receptor activity /// MHC class I protein complex
8117760	1.16314	2.23944	7.71512	12.405	1.05745e-10	2.20063e-07	13.3739	HLA-F	major histocompatibility complex, class I, F	antigen processing and presentation of peptide antigen via MHC class I /// immune response /// membrane /// integral to membrane /// antigen processing and presentation /// MHC class I receptor activity /// MHC class I protein complex
8025551	1.15962	2.23399	9.39022	9.72129	6.49179e-09	6.83367e-06	10.0743	C19orf66 /// ANGPTL6	chromosome 19 open reading frame 66 /// angiopoietin-like 6	angiogenesis /// receptor binding /// extracellular region /// extracellular space /// signal transduction /// multicellular organismal development /// secretory granule /// cell differentiation
8050102	1.15909	2.23316	9.08263	6.05914	7.0998e-06	0.00271726	3.9017	CMPK2	cytidine monophosphate (UMP-CMP) kinase 2, mitochondrial	nucleotide binding /// cytidylate kinase activity /// ATP binding /// mitochondrion /// pyrimidine nucleotide biosynthetic process /// kinase activity /// transferase activity
8179041	1.15669	2.22946	11.7162	7.29194	5.52673e-07	0.000278824	6.21614	---	---	---
8179019	1.11815	2.17069	8.08772	12.4459	9.98554e-11	2.20063e-07	13.4175	HLA-F	major histocompatibility complex, class I, F	antigen processing and presentation of peptide antigen via MHC class I /// immune response /// membrane /// integral to membrane /// antigen processing and presentation /// MHC class I receptor activity /// MHC class I protein complex
8179049	1.11413	2.16465	11.6062	6.68241	1.90437e-06	0.000856888	5.10157	HLA-G /// HLA-J /// HLA-A	major histocompatibility complex, class I, G /// major histocompatibility complex, class I, J (pseudogene) /// major histocompatibility complex, class I, A	Golgi membrane /// antigen processing and presentation of peptide antigen via MHC class I /// protein binding /// integral to plasma membrane /// immune response /// immune response /// membrane /// integral to membrane /// antigen processing and presentation /// early endosome membrane /// MHC class I receptor activity /// MHC class I protein complex /// interspecies interaction between organism…
8177725	1.10586	2.15227	11.3835	7.86691	1.8013e-07	0.000105224	7.21275	HLA-G /// HLA-A	major histocompatibility complex, class I, G /// major histocompatibility complex, class I, A	antigen processing and presentation of peptide antigen via MHC class I /// immune response /// cellular defense response /// membrane /// integral to membrane /// antigen processing and presentation /// MHC class I receptor activity /// MHC class I protein complex /// Golgi membrane /// protein binding /// integral to plasma membrane /// immune response /// early endosome membrane /// MHC class I…
8179034	1.10586	2.15227	11.3835	7.86691	1.8013e-07	0.000105224	7.21275	HLA-G /// HLA-A	major histocompatibility complex, class I, G /// major histocompatibility complex, class I, A	antigen processing and presentation of peptide antigen via MHC class I /// immune response /// cellular defense response /// membrane /// integral to membrane /// antigen processing and presentation /// MHC class I receptor activity /// MHC class I protein complex /// Golgi membrane /// protein binding /// integral to plasma membrane /// immune response /// early endosome membrane /// MHC class I…
8117813	1.07948	2.11327	11.4398	7.22147	6.36028e-07	0.000316087	6.09032	HLA-G /// HLA-J /// HLA-A	major histocompatibility complex, class I, G /// major histocompatibility complex, class I, J (pseudogene) /// major histocompatibility complex, class I, A	Golgi membrane /// antigen processing and presentation of peptide antigen via MHC class I /// protein binding /// integral to plasma membrane /// immune response /// immune response /// membrane /// integral to membrane /// antigen processing and presentation /// early endosome membrane /// MHC class I receptor activity /// MHC class I protein complex /// interspecies interaction between organism…
7951397	1.07872	2.11216	6.6079	5.68035	1.61785e-05	0.00579243	3.14458	CASP1	caspase 1, apoptosis-related cysteine peptidase (interleukin 1, beta, convertase)	response to hypoxia /// cysteine-type endopeptidase activity /// protein binding /// extracellular region /// intracellular /// cytoplasm /// proteolysis /// apoptosis /// induction of apoptosis /// signal transduction /// cell death /// peptidase activity /// caspase activator activity /// protein processing /// response to ATP /// response to chemical stimulus /// regulation of apoptosis /// po…
8055702	1.06419	2.09099	9.68193	9.83298	5.38616e-09	6.18425e-06	10.2303	NMI	N-myc (and STAT) interactor	transcription cofactor activity /// protein binding /// cytoplasm /// transcription from RNA polymerase II promoter /// inflammatory response /// JAK-STAT cascade
8005458	1.05209	2.07353	7.82693	6.6129	2.19984e-06	0.000976641	4.97072	LGALS9C /// LGALS9B /// LGALS9	lectin, galactoside-binding, soluble, 9C /// lectin, galactoside-binding, soluble, 9B /// lectin, galactoside-binding, soluble, 9	signal transducer activity /// sugar binding /// galactose binding /// extracellular region /// cytoplasm /// positive regulation of I-kappaB kinase/NF-kappaB cascade
8156688	1.02768	2.03875	9.10282	9.02697	2.14202e-08	1.69403e-05	9.06398	TDRD7	tudor domain containing 7	nucleic acid binding /// protein binding /// cytoplasm /// mitochondrial matrix /// germ cell development /// chromatoid body /// P granule /// protein N-terminus binding /// cytoplasm /// ribonucleoprotein complex
8177732	1.01837	2.02563	11.4917	9.05919	2.02395e-08	1.68479e-05	9.11244	HLA-A /// HLA-C /// HLA-K /// LOC441528 /// HLA-B	major histocompatibility complex, class I, A /// major histocompatibility complex, class I, C /// major histocompatibility complex, class I, K (pseudogene) /// hypothetical protein LOC441528 /// major histocompatibility complex, class I, B	Golgi membrane /// antigen processing and presentation of peptide antigen via MHC class I /// protein binding /// integral to plasma membrane /// immune response /// immune response /// membrane /// integral to membrane /// antigen processing and presentation /// early endosome membrane /// MHC class I receptor activity /// MHC class I protein complex /// interspecies interaction between organism…
8177788	1.008	2.01112	10.3724	7.67761	2.5927e-07	0.000143882	6.89052	HLA-E /// HLA-C /// HLA-B	major histocompatibility complex, class I, E /// major histocompatibility complex, class I, C /// major histocompatibility complex, class I, B	antigen processing and presentation of peptide antigen via MHC class I /// protein binding /// membrane fraction /// plasma membrane /// integral to plasma membrane /// defense response /// immune response /// immune response /// membrane /// integral to membrane /// antigen processing and presentation /// MHC class I receptor activity /// MHC class I protein complex /// interspecies interaction …
8179103	1.008	2.01112	10.3724	7.67761	2.5927e-07	0.000143882	6.89052	HLA-E /// HLA-C /// HLA-B	major histocompatibility complex, class I, E /// major histocompatibility complex, class I, C /// major histocompatibility complex, class I, B	antigen processing and presentation of peptide antigen via MHC class I /// protein binding /// membrane fraction /// plasma membrane /// integral to plasma membrane /// defense response /// immune response /// immune response /// membrane /// integral to membrane /// antigen processing and presentation /// MHC class I receptor activity /// MHC class I protein complex /// interspecies interaction …
8117890	0.977051	1.96844	10.3126	7.06757	8.66399e-07	0.000424242	5.81278	HLA-E /// HLA-C /// HLA-B	major histocompatibility complex, class I, E /// major histocompatibility complex, class I, C /// major histocompatibility complex, class I, B	antigen processing and presentation of peptide antigen via MHC class I /// protein binding /// membrane fraction /// plasma membrane /// integral to plasma membrane /// defense response /// immune response /// immune response /// membrane /// integral to membrane /// antigen processing and presentation /// MHC class I receptor activity /// MHC class I protein complex /// interspecies interaction …
7948493	0.966109	1.95357	7.11474	6.35426	3.78369e-06	0.00149983	4.47721	SLC15A3 /// TMEM132A	solute carrier family 15, member 3 /// transmembrane protein 132A	transporter activity /// lysosomal membrane /// oligopeptide transport /// protein transport /// symporter activity /// peptide:hydrogen symporter activity /// membrane /// integral to membrane /// Golgi membrane /// molecular_function /// cellular_component /// endoplasmic reticulum /// endoplasmic reticulum membrane /// Golgi apparatus /// biological_process /// lysosome
8117800	0.962591	1.94881	11.4988	9.66112	7.18301e-09	6.87578e-06	9.9895	HLA-A /// HLA-C /// HLA-K /// LOC441528 /// HLA-B	major histocompatibility complex, class I, A /// major histocompatibility complex, class I, C /// major histocompatibility complex, class I, K (pseudogene) /// hypothetical protein LOC441528 /// major histocompatibility complex, class I, B	Golgi membrane /// antigen processing and presentation of peptide antigen via MHC class I /// protein binding /// integral to plasma membrane /// immune response /// immune response /// membrane /// integral to membrane /// antigen processing and presentation /// early endosome membrane /// MHC class I receptor activity /// MHC class I protein complex /// interspecies interaction between organism…
7960744	0.936788	1.91426	8.2493	5.50967	2.35772e-05	0.00809329	2.79711	C1R	complement component 1, r subcomponent	serine-type endopeptidase activity /// calcium ion binding /// extracellular region /// extracellular region /// proteolysis /// immune response /// complement activation, classical pathway /// peptidase activity /// serine-type peptidase activity /// innate immune response /// serine-type endopeptidase activity
8117777	0.920895	1.89329	10.2002	8.27895	8.28803e-08	5.41111e-05	7.89439	HLA-G /// HLA-A /// HLA-K /// LOC441528 /// HLA-B /// HLA-H	major histocompatibility complex, class I, G /// major histocompatibility complex, class I, A /// major histocompatibility complex, class I, K (pseudogene) /// hypothetical protein LOC441528 /// major histocompatibility complex, class I, B /// major histocompatibility complex, class I, H (pseudogene)	Golgi membrane /// antigen processing and presentation of peptide antigen via MHC class I /// protein binding /// integral to plasma membrane /// immune response /// immune response /// membrane /// integral to membrane /// antigen processing and presentation /// early endosome membrane /// MHC class I receptor activity /// MHC class I protein complex /// interspecies interaction between organism…
8041422	0.916874	1.88802	6.07599	5.79218	1.26639e-05	0.00468521	3.37016	RASGRP3	RAS guanyl releasing protein 3 (calcium and DAG-regulated)	MAPKKK cascade /// signal transducer activity /// Ras guanyl-nucleotide exchange factor activity /// calcium ion binding /// protein binding /// intracellular /// cytoplasm /// integral to plasma membrane /// small GTPase mediated signal transduction /// Ras protein signal transduction /// Ras GTPase binding /// kinase binding /// diacylglycerol binding /// guanyl-nucleotide exchange factor compl…
7917503	0.861822	1.81733	9.0731	6.82659	1.41481e-06	0.000654292	5.37057	GBP3	guanylate binding protein 3	nucleotide binding /// GTPase activity /// GTP binding /// membrane /// integral to membrane /// immune response
7945371	0.854029	1.80754	12.1759	7.92657	1.60755e-07	9.7321e-05	7.31313	IFITM3	interferon induced transmembrane protein 3 (1-8U)	plasma membrane /// immune response /// response to biotic stimulus /// integral to membrane
8125500	0.834125	1.78278	8.39974	6.46787	2.97845e-06	0.00125536	4.69526	PSMB8	proteasome (prosome, macropain) subunit, beta type, 8 (large multifunctional peptidase 7)	proteasome complex /// threonine-type endopeptidase activity /// protein binding /// nucleus /// cytoplasm /// proteasome core complex /// immune response /// peptidase activity /// anaphase-promoting complex-dependent proteasomal ubiquitin-dependent protein catabolic process /// interspecies interaction between organisms /// negative regulation of ubiquitin-protein ligase activity involved in mi…
8178855	0.834125	1.78278	8.39974	6.46787	2.97845e-06	0.00125536	4.69526	PSMB8	proteasome (prosome, macropain) subunit, beta type, 8 (large multifunctional peptidase 7)	proteasome complex /// threonine-type endopeptidase activity /// protein binding /// nucleus /// cytoplasm /// proteasome core complex /// immune response /// peptidase activity /// anaphase-promoting complex-dependent proteasomal ubiquitin-dependent protein catabolic process /// interspecies interaction between organisms /// negative regulation of ubiquitin-protein ligase activity involved in mi…
8180049	0.834125	1.78278	8.39974	6.46787	2.97845e-06	0.00125536	4.69526	PSMB8	proteasome (prosome, macropain) subunit, beta type, 8 (large multifunctional peptidase 7)	proteasome complex /// threonine-type endopeptidase activity /// protein binding /// nucleus /// cytoplasm /// proteasome core complex /// immune response /// peptidase activity /// anaphase-promoting complex-dependent proteasomal ubiquitin-dependent protein catabolic process /// interspecies interaction between organisms /// negative regulation of ubiquitin-protein ligase activity involved in mi…
8013479	0.774173	1.71021	8.74994	6.44522	3.12354e-06	0.00126835	4.65196	CCDC144A /// CCDC144B /// LOC100134159 /// CCDC144NL /// CCDC144C	coiled-coil domain containing 144A /// coiled-coil domain containing 144B /// similar to Coiled-coil domain containing 144B /// coiled-coil domain containing 144 family, N-terminal like /// coiled-coil domain containing 144C	---
7916616	0.773805	1.70977	7.22554	8.5843	4.72965e-08	3.35071e-05	8.38226	CYP2J2	cytochrome P450, family 2, subfamily J, polypeptide 2	endoplasmic reticulum /// endoplasmic reticulum membrane /// microsome /// icosanoid metabolic process /// xenobiotic metabolic process /// regulation of heart contraction /// arachidonic acid epoxygenase activity /// arachidonic acid 14,15-epoxygenase activity /// arachidonic acid 11,12-epoxygenase activity /// electron carrier activity /// membrane /// epoxygenase P450 pathway /// heme binding …
8119198	0.761604	1.69537	9.58901	7.05965	8.80375e-07	0.000424839	5.79838	FTSJD2	FtsJ methyltransferase domain containing 2	nucleic acid binding /// protein binding /// intracellular /// nucleus /// methyltransferase activity /// transferase activity /// methylation
8148572	0.757694	1.69079	10.9244	6.36903	3.66749e-06	0.00147128	4.50566	LY6E	lymphocyte antigen 6 complex, locus E	in utero embryonic development /// plasma membrane /// integral to plasma membrane /// cell surface receptor linked signaling pathway /// adrenal gland development /// anchored to membrane /// organ growth /// norepinephrine metabolic process /// epinephrine secretion /// ventricular cardiac muscle tissue morphogenesis /// cell surface receptor linked signal transduction /// ventricular cardiac m…
7920531	0.725078	1.65299	11.1374	8.26266	8.54264e-08	5.47008e-05	7.86796	ADAR	adenosine deaminase, RNA-specific	DNA binding /// double-stranded RNA binding /// double-stranded RNA adenosine deaminase activity /// double-stranded RNA adenosine deaminase activity /// intracellular /// nucleus /// nucleus /// nucleolus /// cytoplasm /// mRNA processing /// base conversion or substitution editing /// hydrolase activity /// gene silencing by RNA /// metal ion binding /// nucleolus /// zinc ion binding
8048940	0.654929	1.57454	10.2778	6.22858	4.94001e-06	0.00191265	4.23371	SP100	SP100 nuclear antigen	negative regulation of transcription from RNA polymerase II promoter /// DNA binding /// transcription coactivator activity /// transcription corepressor activity /// protein binding /// nucleus /// chromosome /// DNA damage response, signal transduction by p53 class mediator resulting in transcription of p21 class mediator /// PML body /// kinase binding /// protein domain specific binding /// r…
8072710	0.63302	1.55081	8.92731	5.56313	2.09462e-05	0.00726508	2.90636	APOL6	apolipoprotein L, 6	lipid transporter activity /// extracellular region /// cytoplasm /// lipid transport /// lipid binding /// lipoprotein metabolic process
8010454	0.615709	1.53231	10.1401	5.64983	1.73014e-05	0.00606404	3.08272	RNF213 /// LOC100294362	ring finger protein 213 /// hypothetical LOC100294362	nucleotide binding /// protein binding /// zinc ion binding /// nucleoside-triphosphatase activity /// metal ion binding
8154785	0.607326	1.52343	11.2554	5.80441	1.233e-05	0.00466538	3.39475	CHMP5	chromatin modifying protein 5	regulation of receptor recycling /// protein binding /// nucleus /// cytoplasm /// endosome /// cytosol /// lysosome organization /// endosome to lysosome transport /// endosome membrane /// protein transport /// membrane
8010426	0.573053	1.48767	9.7426	5.47084	2.56973e-05	0.00855644	2.71756	KIAA1618 /// RNF213	KIAA1618 /// ring finger protein 213	nucleotide binding /// protein binding /// zinc ion binding /// nucleoside-triphosphatase activity /// metal ion binding
8018975	0.513682	1.42769	11.2791	5.64996	1.72963e-05	0.00606404	3.08299	LGALS3BP	lectin, galactoside-binding, soluble, 3 binding protein	scavenger receptor activity /// protein binding /// extracellular region /// proteinaceous extracellular matrix /// extracellular space /// nucleus /// cellular defense response /// cell adhesion /// signal transduction /// membrane /// intracellular membrane-bounded organelle /// scavenger receptor activity
7983157	0.475773	1.39066	10.3781	5.68986	1.58442e-05	0.0057344	3.16383	TMEM62	transmembrane protein 62	membrane /// integral to membrane
8125483	0.465012	1.38033	9.99392	5.71388	1.50305e-05	0.00549968	3.21241	HLA-DOB /// TAP2	major histocompatibility complex, class II, DO beta /// transporter 2, ATP-binding cassette, sub-family B (MDR/TAP)	nucleotide binding /// homoaconitate hydratase activity /// transporter activity /// protein binding /// ATP binding /// nucleus /// endoplasmic reticulum /// endoplasmic reticulum lumen /// endoplasmic reticulum membrane /// cytosol /// protein complex assembly /// intracellular protein transport /// immune response /// peptide transporter activity /// peptide antigen-transporting ATPase activit…
8101158	0.458597	1.3742	10.7224	5.79772	1.25115e-05	0.00468084	3.38131	SCARB2	scavenger receptor class B, member 2	receptor activity /// protein binding /// membrane fraction /// lysosomal membrane /// integral to plasma membrane /// cell adhesion /// membrane /// lysosome
8026139	-0.589979	0.664352	9.73655	-5.4751	2.54556e-05	0.00855644	2.72629	NFIX	nuclear factor I/X (CCAAT-binding transcription factor)	transcription factor activity /// RNA polymerase II transcription factor activity, enhancer binding /// intracellular /// nucleus /// DNA replication /// regulation of transcription, DNA-dependent /// transcription from RNA polymerase II promoter
8076792	-0.822973	0.565276	9.81078	-6.71894	1.76577e-06	0.000805409	5.17004	CERK	ceramide kinase	nucleotide binding /// magnesium ion binding /// integral to membrane of membrane fraction /// ceramide kinase activity /// diacylglycerol kinase activity /// ATP binding /// nucleus /// cytoplasm /// ceramide metabolic process /// activation of protein kinase C activity by G-protein coupled receptor protein signaling pathway /// membrane /// transferase activity /// calcium ion binding /// cytop…
