# Supplementary material for: Suppression of IFN-Induced Transcription Underlies IFN Defects Generated by Activated Ras/MEK in Human Cancer Cells
Source: PLoS One. 2012 Sep 7;7(9):e44267. doi: 10.1371/journal.pone.0044267 (PMC3436881; doi:10.1371/journal.pone.0044267)
Supplement: File S3 — Differentially expressed genes in HT1080 cells treated with U0126 for 6 h compared to vehicle treated controls (FDR <0.01). (XLS) [file pone.0044267.s008.xls]

## Sheet: ttU6p01
ID	logFC	FC	AveExpr	t	P.Value	adj.P.Val	B	Gene Symbol	Gene Title	GO Description
8112980	2.82034	7.0633	7.61207	4.4623	0.000252541	0.00783067	0.366973	EDIL3	EGF-like repeats and discoidin I-like domains 3	integrin binding /// calcium ion binding /// protein binding /// extracellular region /// cell adhesion /// multicellular organismal development /// positive regulation of cell-substrate adhesion
8098287	2.73599	6.66216	7.03342	6.28426	4.3885e-06	0.000418022	4.34681	---	---	---
8124562	2.72041	6.59061	7.50292	14.6296	5.7208e-12	4.2069e-08	17.1708	ZNF323	zinc finger protein 323	transcription factor activity /// intracellular /// nucleus /// cytoplasm /// regulation of transcription, DNA-dependent /// zinc ion binding /// metal ion binding /// nucleus
8122222	2.46764	5.53136	8.26624	4.43962	0.000266078	0.00809613	0.315921	PDE7B	phosphodiesterase 7B	3',5'-cyclic-AMP phosphodiesterase activity /// signal transduction /// synaptic transmission /// hydrolase activity /// metal ion binding /// signal transduction
8040103	2.3898	5.24085	9.49687	10.0742	3.61647e-09	1.92231e-06	11.2363	ID2	inhibitor of DNA binding 2, dominant negative helix-loop-helix protein	negative regulation of transcription from RNA polymerase II promoter /// chromatin /// protein binding /// nucleus /// cytoplasm /// cytosol /// multicellular organismal development /// heart development /// positive regulation of cell proliferation /// negative regulation of transcription /// transcription repressor activity /// enucleate erythrocyte differentiation /// negative regulation of tr…
7958262	2.31917	4.99046	7.85396	5.42322	2.85667e-05	0.00157572	2.50516	TCP11L2	t-complex 11 (mouse)-like 2	---
8083743	2.26259	4.79852	6.68093	8.09771	1.16291e-07	2.76581e-05	7.89761	ARL14	ADP-ribosylation factor-like 14	nucleotide binding /// GTP binding /// intracellular /// small GTPase mediated signal transduction
8129666	2.25817	4.78384	8.22952	7.7587	2.21688e-07	4.66539e-05	7.26985	SLC2A12	solute carrier family 2 (facilitated glucose transporter), member 12	transporter activity /// cytoplasm /// carbohydrate transport /// endomembrane system /// membrane /// integral to membrane /// substrate-specific transmembrane transporter activity /// perinuclear region of cytoplasm /// transmembrane transport
7915787	2.21335	4.63752	8.97482	6.38586	3.53947e-06	0.000355889	4.55802	PIK3R3	phosphoinositide-3-kinase, regulatory subunit 3 (gamma)	protein binding /// phosphoinositide 3-kinase complex /// insulin receptor signaling pathway /// 1-phosphatidylinositol-3-kinase activity /// phosphoinositide 3-kinase regulator activity /// 1-phosphatidylinositol-3-kinase regulator activity
7917530	2.0838	4.23923	7.64158	6.36134	3.72755e-06	0.000370496	4.50717	---	---	---
8097288	1.99394	3.98323	7.9548	5.85652	1.10066e-05	0.00079671	3.44297	FAT4	FAT tumor suppressor homolog 4 (Drosophila)	calcium ion binding /// protein binding /// plasma membrane /// cell adhesion /// homophilic cell adhesion /// integral to membrane /// membrane
8099912	1.9404	3.83812	8.74612	10.1605	3.14157e-09	1.85063e-06	11.3701	C4orf34	chromosome 4 open reading frame 34	protein binding /// membrane /// integral to membrane
8089261	1.90299	3.73988	9.88263	4.46599	0.000250406	0.00780347	0.375276	CBLB	Cas-Br-M (murine) ecotropic retroviral transforming sequence b	positive regulation of T cell anergy /// signal transducer activity /// calcium ion binding /// protein binding /// nucleus /// cytoplasm /// NLS-bearing substrate import into nucleus /// immune response /// signal transduction /// cell surface receptor linked signaling pathway /// zinc ion binding /// ligase activity /// T cell activation /// positive regulation of protein catabolic process /// …
7917532	1.79451	3.46899	7.61207	7.42132	4.27787e-07	7.82639e-05	6.62852	GBP2	guanylate binding protein 2, interferon-inducible	nucleotide binding /// GTPase activity /// GTP binding /// plasma membrane /// immune response /// GTP binding
8072678	1.79182	3.46251	10.2878	5.9745	8.52167e-06	0.000662958	3.69456	HMOX1	heme oxygenase (decycling) 1	angiogenesis /// response to hypoxia /// endothelial cell proliferation /// healing during inflammatory response /// negative regulation of leukocyte migration /// heme oxygenase (decyclizing) activity /// heme oxygenase (decyclizing) activity /// phospholipase D activity /// signal transducer activity /// extracellular space /// membrane fraction /// nucleus /// nucleolus /// endoplasmic reticul…
8012949	1.7843	3.44451	7.72939	7.78166	2.12109e-07	4.52729e-05	7.31289	TRIM16 /// FBXW10 /// CDRT1	tripartite motif-containing 16 /// F-box and WD repeat domain containing 10 /// CMT1A duplicated region transcript 1	molecular_function /// cellular_component /// biological_process /// DNA binding /// protein binding /// intracellular /// cytoplasm /// zinc ion binding /// transcription activator activity /// PML body /// interleukin-1 binding /// NACHT domain binding /// response to retinoic acid /// positive regulation of gene-specific transcription /// histone H3 acetylation /// histone H4 acetylation /// p…
7987454	1.78112	3.43694	8.05915	10.1392	3.25222e-09	1.86706e-06	11.3372	BMF	Bcl2 modifying factor	protein binding /// protein binding /// cytoplasm /// cytosol /// plasma membrane /// apoptosis /// myosin complex /// regulation of apoptosis
8084630	1.76819	3.40626	10.6407	4.6534	0.000162836	0.0057144	0.796474	---	---	---
8113504	1.75938	3.38553	10.1519	9.58227	8.20658e-09	3.82136e-06	10.4548	C5orf13	chromosome 5 open reading frame 13	cytoplasm /// protein binding /// regulation of transforming growth factor beta receptor signaling pathway
8156571	1.75078	3.36541	6.66369	11.4598	4.14908e-10	4.76386e-07	13.2757	C9orf3 /// MIR27B	chromosome 9 open reading frame 3 /// microRNA 27b	aminopeptidase activity /// binding /// cytoplasm /// proteolysis /// peptidase activity /// metallopeptidase activity /// zinc ion binding /// leukotriene biosynthetic process /// metal ion binding
8136336	1.74397	3.34955	6.13474	4.7197	0.00013991	0.00508578	0.945156	AKR1B10	aldo-keto reductase family 1, member B10 (aldose reductase)	aldo-keto reductase activity /// protein binding /// cellular_component /// cytoplasm /// cellular aldehyde metabolic process /// digestion /// steroid metabolic process /// oxidoreductase activity /// oxidation reduction
8147145	1.73908	3.33822	7.80763	7.31147	5.31639e-07	9.07794e-05	6.41614	ATP6V0D2	ATPase, H+ transporting, lysosomal 38kDa, V0 subunit d2	protein binding /// endosome /// ion transport /// hydrogen ion transmembrane transporter activity /// ATP synthesis coupled proton transport /// proton transport /// membrane /// apical plasma membrane /// vacuolar proton-transporting V-type ATPase complex /// proton-transporting V-type ATPase, V0 domain
8112731	1.72228	3.29956	9.02311	4.88079	9.68843e-05	0.0038818	1.30551	F2RL2	coagulation factor II (thrombin) receptor-like 2	phosphoinositide phospholipase C activity /// receptor activity /// G-protein coupled receptor activity /// protein binding /// extracellular region /// plasma membrane /// integral to plasma membrane /// signal transduction /// G-protein coupled receptor protein signaling pathway /// blood coagulation /// response to wounding /// thrombin receptor activity /// apical plasma membrane /// G-protei…
8141843	1.69232	3.23177	6.94298	5.34141	3.42819e-05	0.00181476	2.32588	LOC100286937 /// RASA4	similar to HSPC047 protein /// RAS p21 protein activator 4	GTPase activator activity /// intracellular /// cytoplasm /// cytosol /// plasma membrane /// metal ion binding /// regulation of small GTPase mediated signal transduction /// intracellular signaling cascade /// zinc ion binding
8127158	1.63506	3.106	10.6383	5.82587	1.17665e-05	0.000835368	3.37733	GCLC	glutamate-cysteine ligase, catalytic subunit	nucleotide binding /// magnesium ion binding /// glutamate-cysteine ligase activity /// glutamate-cysteine ligase activity /// ATP binding /// cytosol /// cysteine metabolic process /// glutamate metabolic process /// glutathione biosynthetic process /// glutathione biosynthetic process /// anti-apoptosis /// response to oxidative stress /// response to heat /// response to xenobiotic stimulus //…
7982366	1.62953	3.09413	8.76058	8.42423	6.33703e-08	1.819e-05	8.48659	SCG5	secretogranin V (7B2 protein)	enzyme inhibitor activity /// protein binding /// GTP binding /// extracellular region /// transport /// intracellular protein transport /// neuropeptide signaling pathway /// peptide hormone processing /// secretory granule /// regulation of hormone secretion /// unfolded protein binding
8098263	1.62757	3.08992	7.30392	10.6625	1.4069e-09	1.04101e-06	12.1304	PALLD	palladin, cytoskeletal associated protein	actin binding /// protein binding /// nucleus /// cytoplasm /// cytoskeleton /// actin filament /// cytoskeleton organization /// muscle alpha-actinin binding
8047487	1.61966	3.07302	8.47308	10.3067	2.47915e-09	1.62149e-06	11.5947	FZD7	frizzled homolog 7 (Drosophila)	non-G-protein coupled 7TM receptor activity /// G-protein coupled receptor activity /// plasma membrane /// signal transduction /// G-protein coupled receptor protein signaling pathway /// multicellular organismal development /// integral to membrane /// Wnt receptor signaling pathway /// Wnt receptor activity /// plasma membrane /// integral to membrane
8136200	1.61302	3.05891	9.84642	4.98336	7.67491e-05	0.00330089	1.53416	CPA4	carboxypeptidase A4	metallocarboxypeptidase activity /// cellular_component /// extracellular region /// proteolysis /// peptidase activity /// metallopeptidase activity /// zinc ion binding /// histone acetylation /// metal ion binding
7972932	1.61191	3.05656	7.64855	6.866	1.30507e-06	0.000173127	5.53702	FLJ41484	hypothetical LOC650669	---
7893397	1.57082	2.97073	5.70802	4.62875	0.000172301	0.00596373	0.741133	---	---	---
8090214	1.52906	2.88597	8.06399	12.4383	1.00915e-10	1.76851e-07	14.584	SLC12A8	solute carrier family 12 (potassium/chloride transporters), member 8	ion transport /// potassium ion transport /// symporter activity /// membrane /// integral to membrane /// transmembrane transport /// potassium ion binding /// chloride ion binding
8060997	1.51797	2.86388	8.71967	6.65795	2.00337e-06	0.000241689	5.11674	SPTLC3	serine palmitoyltransferase, long chain base subunit 3	serine C-palmitoyltransferase activity /// endoplasmic reticulum /// endoplasmic reticulum membrane /// acyltransferase activity /// biosynthetic process /// membrane /// integral to membrane /// transferase activity, transferring nitrogenous groups /// serine C-palmitoyltransferase complex /// sphingolipid biosynthetic process /// pyridoxal phosphate binding /// sphingoid biosynthetic process
8080781	1.51275	2.85354	11.2403	7.97575	1.46413e-07	3.29399e-05	7.6737	PXK	PX domain containing serine/threonine kinase	nucleotide binding /// actin binding /// protein kinase activity /// protein binding /// ATP binding /// cytoplasm /// plasma membrane /// protein amino acid phosphorylation /// inflammatory response /// cell communication /// phosphoinositide binding /// regulation of synaptic transmission
8113073	1.51247	2.85297	9.94011	4.41356	0.000282531	0.00842205	0.257272	ARRDC3	arrestin domain containing 3	cytoplasm
8012951	1.48625	2.8016	8.83643	6.39877	3.44442e-06	0.000349661	4.58475	TRIM16 /// CDRT1 /// FBXW10	tripartite motif-containing 16 /// CMT1A duplicated region transcript 1 /// F-box and WD repeat domain containing 10	molecular_function /// cellular_component /// biological_process /// DNA binding /// protein binding /// intracellular /// cytoplasm /// zinc ion binding /// transcription activator activity /// PML body /// interleukin-1 binding /// NACHT domain binding /// response to retinoic acid /// positive regulation of gene-specific transcription /// histone H3 acetylation /// histone H4 acetylation /// p…
8129573	1.48207	2.79349	7.47932	12.7471	6.577e-11	1.2882e-07	14.9761	MOXD1	monooxygenase, DBH-like 1	monooxygenase activity /// dopamine beta-monooxygenase activity /// copper ion binding /// endoplasmic reticulum /// endoplasmic reticulum membrane /// histidine catabolic process /// catecholamine metabolic process /// cellular process /// membrane /// integral to membrane /// metal ion binding /// oxidation reduction
8151890	1.46829	2.76693	9.25351	4.68647	0.000150959	0.00541647	0.870668	TP53INP1	tumor protein p53 inducible nuclear protein 1	nucleus /// apoptosis /// induction of apoptosis /// response to stress /// cell cycle arrest
8131844	1.46327	2.75732	9.89538	7.33554	5.06842e-07	8.78974e-05	6.46283	GPNMB	glycoprotein (transmembrane) nmb	osteoblast differentiation /// integrin binding /// integral to plasma membrane /// cell adhesion /// heparin binding /// negative regulation of cell proliferation /// membrane /// integral to membrane /// cytoplasmic membrane-bounded vesicle /// bone mineralization /// melanosome
7918426	1.45473	2.74105	8.59434	5.68238	1.61067e-05	0.00102885	3.06858	SLC16A4	solute carrier family 16, member 4 (monocarboxylic acid transporter 5)	membrane fraction /// plasma membrane /// integral to plasma membrane /// monocarboxylic acid transmembrane transporter activity /// symporter activity /// monocarboxylic acid transport /// transmembrane transport /// transport
7958273	1.44214	2.71724	5.96743	5.16655	5.07403e-05	0.00242396	1.94056	---	---	---
8152703	1.43197	2.69815	9.62544	5.09888	5.90999e-05	0.00272178	1.79075	FBXO32	F-box protein 32	protein binding /// modification-dependent protein catabolic process
7974697	1.42002	2.67589	7.89514	6.49175	2.83293e-06	0.000309272	4.77667	DAAM1	dishevelled associated activator of morphogenesis 1	actin binding /// cytoplasm /// cellular component organization /// actin cytoskeleton organization /// Rho GTPase binding
7900633	1.41917	2.67432	6.46844	4.72235	0.000139064	0.00507589	0.951099	---	---	---
7912145	1.41144	2.66003	7.69146	7.08373	8.38603e-07	0.000128087	5.97026	TNFRSF9	tumor necrosis factor receptor superfamily, member 9	receptor activity /// protein binding /// integral to plasma membrane /// induction of apoptosis /// negative regulation of cell proliferation /// membrane /// receptor activity
7967028	1.39174	2.62395	7.81364	4.43921	0.000266327	0.00809613	0.315003	RNU4-2	RNA, U4 small nuclear 2	---
7958200	1.38815	2.61744	9.99187	7.72619	2.36028e-07	4.82149e-05	7.20877	EID3	EP300 interacting inhibitor of differentiation 3	nucleus /// cytoplasm /// regulation of transcription
7925257	1.3716	2.58758	8.78519	8.29364	8.06507e-08	2.11451e-05	8.25287	LYST	lysosomal trafficking regulator	protein binding /// cytoplasm /// protein transport /// microtubule cytoskeleton /// leukocyte chemotaxis /// melanosome organization /// endosome to lysosome transport via multivesicular body sorting pathway /// mast cell secretory granule organization /// natural killer cell mediated cytotoxicity /// defense response to bacterium /// defense response to protozoan /// pigmentation /// defense re…
7951077	1.36996	2.58464	6.68375	4.8355	0.000107408	0.00415379	1.20436	SESN3	sestrin 3	nucleus /// cell cycle arrest
7953943	1.36666	2.57872	8.53956	6.67087	1.95042e-06	0.000236383	5.14302	GABARAPL1	GABA(A) receptor-associated protein like 1	protein binding /// intracellular /// cytoplasm /// autophagic vacuole /// endoplasmic reticulum /// Golgi apparatus /// microtubule /// membrane /// beta-tubulin binding /// GABA receptor binding
8070097	1.3663	2.57808	6.51359	8.32511	7.6082e-08	2.0596e-05	8.30942	DNAJC28	DnaJ (Hsp40) homolog, subfamily C, member 28	heat shock protein binding
7902290	1.35568	2.55917	7.39782	8.36364	7.08523e-08	1.93911e-05	8.37845	CTH	cystathionase (cystathionine gamma-lyase)	cystathionine beta-lyase activity /// cystathionine gamma-lyase activity /// cytoplasm /// cysteine metabolic process /// glutathione metabolic process /// negative regulation of cell proliferation /// cellular amino acid biosynthetic process /// lyase activity /// protein-pyridoxal-5-phosphate linkage via peptidyl-N6-pyridoxal phosphate-L-lysine /// cysteine biosynthetic process /// pyridoxal ph…
8012464	1.34895	2.54727	8.21197	6.5853	2.32993e-06	0.000270787	4.96856	LOC100128288	hypothetical protein LOC100128288	---
8151334	1.34581	2.54173	7.26042	5.88529	1.0339e-05	0.000759631	3.50449	MSC /// MSC	musculin (activated B-cell factor-1) /// musculin	transcription factor activity /// transcription corepressor activity /// nucleus /// transcription from RNA polymerase II promoter /// regulation of transcription /// nucleus
8047467	1.33738	2.52691	6.07629	11.055	7.65035e-10	7.69219e-07	12.7035	PFTK2 /// CDK15	PFTAIRE protein kinase 2 /// cyclin-dependent kinase 15	nucleotide binding /// cyclin-dependent protein kinase activity /// protein binding /// ATP binding /// protein amino acid phosphorylation /// transferase activity /// metal ion binding /// magnesium ion binding
8005483	1.32126	2.49884	7.17875	5.67381	1.64127e-05	0.00104293	3.05007	TRIM16 /// FBXW10 /// CDRT1	tripartite motif-containing 16 /// F-box and WD repeat domain containing 10 /// CMT1A duplicated region transcript 1	molecular_function /// cellular_component /// biological_process /// DNA binding /// protein binding /// intracellular /// cytoplasm /// zinc ion binding /// transcription activator activity /// PML body /// interleukin-1 binding /// NACHT domain binding /// response to retinoic acid /// positive regulation of gene-specific transcription /// histone H3 acetylation /// histone H4 acetylation /// p…
7907893	1.3157	2.48923	8.23391	7.1045	8.04223e-07	0.000124229	6.01124	MR1	major histocompatibility complex, class I-related	antigen processing and presentation of peptide antigen via MHC class I /// extracellular region /// endoplasmic reticulum /// plasma membrane /// immune response /// integral to membrane /// antigen processing and presentation /// MHC class I receptor activity /// MHC class I protein complex /// immune response
8139033	1.2885	2.44273	6.08462	8.77447	3.35532e-08	1.14671e-05	9.10147	AOAH	acyloxyacyl hydrolase (neutrophil)	catalytic activity /// lipoprotein lipase activity /// lipid metabolic process /// inflammatory response /// hydrolase activity, acting on ester bonds /// acyloxyacyl hydrolase activity /// lipid metabolic process /// lipopolysaccharide metabolic process /// negative regulation of inflammatory response
7953603	1.28105	2.43016	7.76813	4.74725	0.000131369	0.00486577	1.00689	C1S	complement component 1, s subcomponent	serine-type endopeptidase activity /// calcium ion binding /// extracellular region /// proteolysis /// complement activation, classical pathway /// peptidase activity /// glial cell differentiation /// innate immune response /// response to cAMP
7973306	1.27757	2.42431	9.67643	4.35609	0.000322533	0.00926609	0.127894	ABHD4	abhydrolase domain containing 4	lipid catabolic process /// hydrolase activity
7950391	1.24827	2.37556	8.11965	4.70564	0.000144482	0.00522913	0.913644	PGM2L1	phosphoglucomutase 2-like 1	carbohydrate metabolic process /// glucose metabolic process /// transferase activity /// isomerase activity /// intramolecular transferase activity, phosphotransferases /// glucose-1,6-bisphosphate synthase activity
7980316	1.24692	2.37335	8.06217	10.8615	1.03095e-09	8.2796e-07	12.4233	TGFB3	transforming growth factor, beta 3	activation of MAPK activity /// response to hypoxia /// in utero embryonic development /// type II transforming growth factor beta receptor binding /// type II transforming growth factor beta receptor binding /// protein binding /// extracellular region /// extracellular space /// nucleus /// cytoplasm /// plasma membrane /// induction of apoptosis /// transforming growth factor beta receptor sig…
8012953	1.2469	2.3733	10.2991	7.30681	5.36582e-07	9.11559e-05	6.40709	TRIM16	tripartite motif-containing 16	DNA binding /// protein binding /// intracellular /// cytoplasm /// zinc ion binding /// transcription activator activity /// PML body /// interleukin-1 binding /// NACHT domain binding /// response to retinoic acid /// positive regulation of gene-specific transcription /// histone H3 acetylation /// histone H4 acetylation /// positive regulation of keratinocyte differentiation /// response to or…
7923662	1.23852	2.35956	7.99008	5.43291	2.79572e-05	0.0015489	2.52637	PIK3C2B	phosphoinositide-3-kinase, class 2, beta polypeptide	nucleotide binding /// lipid kinase activity /// inositol or phosphatidylinositol kinase activity /// protein binding /// ATP binding /// nucleus /// cytoplasm /// endoplasmic reticulum /// microsome /// cytosol /// plasma membrane /// phosphoinositide 3-kinase complex /// cell communication /// biological_process /// 1-phosphatidylinositol-3-kinase activity /// transferase activity /// phosphotr…
8008819	1.23615	2.35568	7.17335	8.47556	5.76745e-08	1.71463e-05	8.5778	YPEL2	yippee-like 2 (Drosophila)	nucleus /// nucleolus
8171435	1.23033	2.3462	9.49823	8.39663	6.66708e-08	1.89738e-05	8.4374	PIR	pirin (iron-binding nuclear protein)	transcription cofactor activity /// nucleus /// transcription from RNA polymerase II promoter /// metal ion binding /// iron ion binding /// nucleus
8113761	1.2278	2.34209	7.44177	5.52708	2.26851e-05	0.00132983	2.73182	ZNF608	zinc finger protein 608	intracellular /// zinc ion binding /// metal ion binding
8081818	1.21433	2.32033	7.8991	4.83666	0.000107124	0.00415379	1.20696	---	---	---
8098204	1.20703	2.30862	8.65539	7.15414	7.27836e-07	0.000115404	6.10892	CPE	carboxypeptidase E	carboxypeptidase activity /// metallocarboxypeptidase activity /// extracellular region /// plasma membrane /// protein modification process /// proteolysis /// neuropeptide signaling pathway /// metabolic process /// peptidase activity /// metallopeptidase activity /// zinc ion binding /// insulin processing /// metal ion binding
8005475	1.19268	2.28577	12.1895	6.6737	1.93903e-06	0.000236383	5.14877	TRIM16 /// TRIM16L	tripartite motif-containing 16 /// tripartite motif-containing 16-like	DNA binding /// protein binding /// intracellular /// cytoplasm /// zinc ion binding /// transcription activator activity /// PML body /// interleukin-1 binding /// NACHT domain binding /// response to retinoic acid /// positive regulation of gene-specific transcription /// histone H3 acetylation /// histone H4 acetylation /// positive regulation of keratinocyte differentiation /// response to or…
8129937	1.18754	2.27765	11.1983	6.53118	2.60851e-06	0.0002927	4.8577	CITED2	Cbp/p300-interacting transactivator, with Glu/Asp-rich carboxy-terminal domain, 2	negative regulation of transcription from RNA polymerase II promoter /// nuclear chromatin /// blood vessel development /// vasculogenesis /// response to hypoxia /// trophectodermal cell differentiation /// liver development /// embryonic placenta development /// transcription factor activity /// transcription coactivator activity /// transcription corepressor activity /// protein binding /// nu…
8049044	1.18655	2.27609	8.4008	8.43089	6.25991e-08	1.81249e-05	8.49845	ARMC9	armadillo repeat containing 9	binding
7986359	1.18508	2.27376	9.79774	5.11594	5.68682e-05	0.00264461	1.82856	IGF1R	insulin-like growth factor 1 receptor	nucleotide binding /// protein tyrosine kinase activity /// receptor activity /// insulin-like growth factor receptor activity /// insulin receptor binding /// protein binding /// insulin-like growth factor binding /// ATP binding /// microsome /// integral to plasma membrane /// anti-apoptosis /// immune response /// signal transduction /// axonogenesis /// brain development /// positive regulat…
8121076	1.18335	2.27103	9.89135	6.20502	5.19448e-06	0.000471282	4.18113	PNRC1	proline-rich nuclear receptor coactivator 1	protein binding /// nucleus /// regulation of transcription /// nucleus
7895986	1.17423	2.25673	2.92085	4.71534	0.00014131	0.00513106	0.935399	---	---	---
8041940	1.1719	2.25308	6.35142	8.36516	7.06542e-08	1.93911e-05	8.38117	STON1 /// STON1-GTF2A1L /// GTF2A1L	stonin 1 /// STON1-GTF2A1L readthrough /// general transcription factor IIA, 1-like	DNA binding /// RNA polymerase II transcription factor activity /// transcription coactivator activity /// nucleus /// transcription factor TFIIA complex /// transcription from RNA polymerase II promoter /// transcription initiation from RNA polymerase II promoter /// regulation of transcription /// protein binding /// nucleus /// cytoplasm /// intracellular protein transport /// membrane /// reg…
8098995	1.16888	2.24836	8.70332	5.45034	2.68945e-05	0.00150253	2.56446	MXD4	MAX dimerization protein 4	negative regulation of transcription from RNA polymerase II promoter /// DNA binding /// transcription corepressor activity /// protein binding /// nucleus /// negative regulation of cell proliferation /// negative regulation of transcription /// transcription regulator activity /// protein binding
8162276	1.16329	2.23967	9.62786	6.29077	4.32827e-06	0.000414514	4.36038	NFIL3	nuclear factor, interleukin 3 regulated	DNA binding /// transcription factor activity /// transcription corepressor activity /// nucleus /// regulation of transcription, DNA-dependent /// transcription from RNA polymerase II promoter /// immune response /// sequence-specific DNA binding /// protein dimerization activity /// rhythmic process /// transcription factor activity /// nucleus
8090193	1.15999	2.23456	11.482	4.45572	0.000256396	0.00790183	0.352158	HEG1	HEG homolog 1 (zebrafish)	calcium ion binding /// extracellular region /// membrane /// integral to membrane
7951217	1.14564	2.21244	6.43402	5.3867	3.09871e-05	0.00167496	2.42521	MMP7	matrix metallopeptidase 7 (matrilysin, uterine)	metalloendopeptidase activity /// extracellular region /// proteinaceous extracellular matrix /// extracellular space /// proteolysis /// metabolic process /// peptidase activity /// zinc ion binding /// collagen catabolic process /// regulation of cell proliferation /// metal ion binding /// metalloendopeptidase activity /// calcium ion binding /// proteolysis
7928308	1.14562	2.21242	7.72809	7.179	6.92443e-07	0.000111383	6.15769	DDIT4	DNA-damage-inducible transcript 4	response to hypoxia /// intracellular /// cytoplasm /// apoptosis /// negative regulation of signal transduction
8133540	1.14558	2.21234	8.38293	10.7436	1.23879e-09	9.37452e-07	12.2504	GATSL2 /// GATS /// GATSL1	GATS protein-like 2 /// GATS, stromal antigen 3 opposite strand /// GATS protein-like 1	---
8140249	1.14558	2.21234	8.38293	10.7436	1.23879e-09	9.37452e-07	12.2504	GATSL2 /// GATS /// GATSL1	GATS protein-like 2 /// GATS, stromal antigen 3 opposite strand /// GATS protein-like 1	---
7902527	1.14218	2.20714	7.1461	7.82314	1.95873e-07	4.23505e-05	7.39045	PTGFR	prostaglandin F receptor (FP)	receptor activity /// G-protein coupled receptor activity /// prostaglandin F receptor activity /// extracellular region /// plasma membrane /// integral to plasma membrane /// signal transduction /// G-protein coupled receptor protein signaling pathway /// parturition /// prostaglandin F receptor activity /// G-protein coupled receptor protein signaling pathway
8171297	1.14195	2.2068	11.5164	5.99536	8.14613e-06	0.000648904	3.73887	MID1	midline 1 (Opitz/BBB syndrome)	microtubule cytoskeleton organization /// protein binding /// intracellular /// cytoplasm /// spindle /// microtubule /// microtubule associated complex /// negative regulation of microtubule depolymerization /// pattern specification process /// zinc ion binding /// ligase activity /// metal ion binding /// protein binding /// modification-dependent protein catabolic process
7924450	1.13763	2.20019	10.2168	6.01754	7.76547e-06	0.00062607	3.78592	DUSP10	dual specificity phosphatase 10	phosphoprotein phosphatase activity /// protein tyrosine phosphatase activity /// nucleus /// cytoplasm /// protein amino acid dephosphorylation /// response to stress /// JNK cascade /// hydrolase activity /// MAP kinase tyrosine/serine/threonine phosphatase activity /// nucleus /// cytoplasm /// protein amino acid dephosphorylation
7988970	1.12853	2.18636	8.70807	4.82851	0.000109133	0.00420093	1.18873	KIAA1370	KIAA1370	---
8016739	1.1237	2.17905	10.395	5.35167	3.35057e-05	0.00178502	2.3484	TOB1	transducer of ERBB2, 1	transcription corepressor activity /// SH3/SH2 adaptor activity /// protein binding /// cytoplasm /// SMAD protein nuclear translocation /// negative regulation of cell proliferation /// negative regulation of BMP signaling pathway /// negative regulation of osteoblast differentiation /// SMAD binding
7984001	1.12295	2.17792	8.04133	4.89496	9.38096e-05	0.00379075	1.33716	GCNT3	glucosaminyl (N-acetyl) transferase 3, mucin type	Golgi membrane /// beta-1,3-galactosyl-O-glycosyl-glycoprotein beta-1,6-N-acetylglucosaminyltransferase activity /// membrane fraction /// Golgi apparatus /// carbohydrate metabolic process /// protein amino acid O-linked glycosylation /// N-acetyllactosaminide beta-1,6-N-acetylglucosaminyltransferase activity /// membrane /// integral to membrane /// transferase activity, transferring glycosyl g…
8059413	1.11758	2.16983	11.4087	7.60505	2.98491e-07	5.8122e-05	6.97983	DOCK10	dedicator of cytokinesis 10	guanyl-nucleotide exchange factor activity /// GTP binding /// GTPase binding
7931097	1.11735	2.16948	9.85704	7.86152	1.81995e-07	3.9607e-05	7.46201	HTRA1	HtrA serine peptidase 1	regulation of cell growth /// serine-type endopeptidase activity /// insulin-like growth factor binding /// extracellular region /// extracellular space /// proteolysis /// peptidase activity /// negative regulation of transforming growth factor beta receptor signaling pathway /// negative regulation of BMP signaling pathway /// serine-type endopeptidase activity
7956097	1.11247	2.16216	9.00836	4.90189	9.23435e-05	0.00375151	1.35261	SUOX	sulfite oxidase	mitochondrion /// mitochondrial intermembrane space /// cytosol /// response to nutrient /// sulfite oxidase activity /// electron carrier activity /// oxidoreductase activity /// heme binding /// molybdenum ion binding /// molybdopterin cofactor binding /// metal ion binding /// oxidation reduction /// sulfite oxidase activity
8090018	1.1031	2.14816	9.63711	5.51845	2.3123e-05	0.00134838	2.71302	PARP9	poly (ADP-ribose) polymerase family, member 9	NAD+ ADP-ribosyltransferase activity /// protein binding /// nucleus /// nucleus /// cytoplasm /// cell migration /// transferase activity /// molecular_function
8120362	1.10198	2.14649	6.39055	5.21083	4.59315e-05	0.00225398	2.03839	BEND6	BEN domain containing 6	---
8076547	1.0945	2.13539	7.63831	6.56285	2.44156e-06	0.000280333	4.92262	TTLL1	tubulin tyrosine ligase-like family, member 1	tubulin-tyrosine ligase activity /// cytoplasm /// cytoskeleton /// microtubule /// protein modification process /// ligase activity /// protein polyglutamylation /// tubulin-glutamic acid ligase activity
7951672	1.09391	2.13452	5.65364	5.81127	1.21471e-05	0.000855098	3.34602	PIH1D2	PIH1 domain containing 2	---
7941269	1.09378	2.13433	9.16345	9.03541	2.11041e-08	8.07706e-06	9.54841	LOC100291851	similar to Putative ubiquitin-like protein FUBI-like protein ENSP00000310146	---
7983779	1.0927	2.13273	5.98906	6.28075	4.42125e-06	0.000418222	4.3395	UNC13C	unc-13 homolog C (C. elegans)	cytoplasm /// plasma membrane /// exocytosis /// synaptic transmission /// cell junction /// presynaptic membrane /// synapse /// metal ion binding /// intracellular signaling cascade /// zinc ion binding /// diacylglycerol binding
8008321	1.08446	2.12058	7.80015	5.94066	9.16902e-06	0.000695446	3.62257	ACSF2	acyl-CoA synthetase family member 2	nucleotide binding /// ATP binding /// mitochondrion /// lipid metabolic process /// fatty acid metabolic process /// metabolic process /// ligase activity
8102006	1.08352	2.11921	8.52903	7.01759	9.58548e-07	0.000141225	5.83937	MANBA	mannosidase, beta A, lysosomal	hydrolase activity, hydrolyzing O-glycosyl compounds /// beta-mannosidase activity /// mannose binding /// soluble fraction /// lysosome /// carbohydrate metabolic process /// protein modification process /// glycoprotein catabolic process /// metabolic process /// cation binding /// beta-mannosidase activity
8084219	1.082	2.11697	9.55554	4.37478	0.000308935	0.00897609	0.169973	KLHL24	kelch-like 24 (Drosophila)	protein binding /// cytoplasm /// axon /// cell projection /// perikaryon
7924465	1.08143	2.11613	8.14607	7.37386	4.69812e-07	8.27689e-05	6.53697	HHIPL2	HHIP-like 2	catalytic activity /// extracellular region /// carbohydrate metabolic process /// oxidoreductase activity, acting on the CH-OH group of donors, quinone or similar compound as acceptor /// quinone binding
8144699	1.08076	2.11515	6.61842	6.34594	3.85082e-06	0.000378492	4.47521	---	---	---
7995681	1.07839	2.11168	9.74889	11.7529	2.69126e-10	3.73379e-07	13.6784	MMP2	matrix metallopeptidase 2 (gelatinase A, 72kDa gelatinase, 72kDa type IV collagenase)	angiogenesis /// response to hypoxia /// blood vessel maturation /// intramembranous ossification /// metalloendopeptidase activity /// protein binding /// extracellular region /// proteinaceous extracellular matrix /// extracellular space /// nucleus /// plasma membrane /// proteolysis /// metabolic process /// peptidase activity /// zinc ion binding /// sarcomere /// collagen catabolic process …
8167763	1.07513	2.1069	8.13874	7.03526	9.24856e-07	0.000138094	5.87441	TSPYL2	TSPY-like 2	rDNA binding /// protein binding /// nucleus /// nucleolus /// cytoplasm /// nucleosome assembly /// negative regulation of DNA replication /// regulation of signal transduction /// chromatin modification /// negative regulation of cell growth /// regulation of transcription /// negative regulation of cell cycle /// regulation of protein kinase activity /// protein binding /// nucleus /// nucleol…
8044375	1.07053	2.10021	8.70459	4.98709	7.61032e-05	0.00328665	1.54245	BCL2L11	BCL2-like 11 (apoptosis facilitator)	peripheral to membrane of membrane fraction /// in utero embryonic development /// B cell homeostasis /// B cell apoptosis /// kidney development /// myeloid cell homeostasis /// protein binding /// membrane fraction /// cytoplasm /// mitochondrion /// mitochondrial outer membrane /// cytosol /// plasma membrane /// apoptosis /// induction of apoptosis /// cell-matrix adhesion /// spermatogenesis…
8117476	1.06946	2.09864	8.53798	7.27622	5.70236e-07	9.54128e-05	6.34761	BTN3A3	butyrophilin, subfamily 3, member A3	membrane /// integral to membrane
7895445	1.06776	2.09618	5.74806	4.96857	7.93676e-05	0.00338374	1.50122	---	---	---
8162533	1.06539	2.09273	8.09182	4.76522	0.000126087	0.0047119	1.04713	PTCH1	patched homolog 1 (Drosophila)	neural tube formation /// neural tube closure /// heart morphogenesis /// receptor activity /// patched binding /// protein binding /// integral to plasma membrane /// signal transduction /// smoothened signaling pathway /// pattern specification process /// hedgehog receptor activity /// heparin binding /// cell proliferation /// epidermis development /// regulation of smoothened signaling pathw…
8053599	1.05201	2.07341	10.205	5.79186	1.26728e-05	0.000879093	3.30436	INO80B /// WBP1	INO80 complex subunit B /// WW domain binding protein 1	cellular_component /// biological_process /// WW domain binding /// WW domain binding /// nucleus /// nucleolus /// zinc ion binding /// metal ion binding
7944763	1.0519	2.07326	6.09038	5.32608	3.5477e-05	0.00186496	2.2922	---	---	---
7974335	1.05107	2.07207	8.92134	7.11692	7.84363e-07	0.000123193	6.03572	---	---	---
7910111	1.04267	2.06003	9.50575	9.1905	1.60854e-08	6.60362e-06	9.80959	EPHX1	epoxide hydrolase 1, microsomal (xenobiotic)	epoxide hydrolase activity /// endoplasmic reticulum /// endoplasmic reticulum membrane /// microsome /// response to toxin /// response to organic cyclic substance /// membrane /// integral to membrane /// hydrolase activity /// aromatic compound catabolic process /// cis-stilbene-oxide hydrolase activity /// epoxide hydrolase activity
8108744	1.0405	2.05694	6.35465	4.51421	0.000224119	0.00721022	0.483754	PCDHB14	protocadherin beta 14	calcium ion binding /// protein binding /// plasma membrane /// cell adhesion /// homophilic cell adhesion /// synaptic transmission /// synapse assembly /// integral to membrane /// calcium-dependent cell-cell adhesion /// protein binding /// synaptogenesis
7951545	1.03887	2.05461	6.15272	5.95868	8.81818e-06	0.000674986	3.66093	EXPH5	exophilin 5	protein binding /// intracellular protein transport /// Rab GTPase binding
8014066	1.0361	2.05068	10.166	6.49857	2.79275e-06	0.000306618	4.7907	EVI2A	ecotropic viral integration site 2A	transmembrane receptor activity /// membrane /// integral to membrane
7908940	1.03583	2.05029	9.68755	4.46578	0.000250529	0.00780347	0.374794	ATP2B4	ATPase, Ca++ transporting, plasma membrane 4	nucleotide binding /// calcium-transporting ATPase activity /// protein binding /// calmodulin binding /// ATP binding /// plasma membrane /// integral to plasma membrane /// ATP biosynthetic process /// transport /// cation transport /// calcium ion transport /// metabolic process /// hydrolase activity /// hydrolase activity, acting on acid anhydrides, catalyzing transmembrane movement of subst…
8107673	1.03525	2.04946	7.84111	6.62251	2.15634e-06	0.000257346	5.04454	GRAMD3	GRAM domain containing 3	---
8050427	1.03469	2.04868	9.64498	4.91918	8.87859e-05	0.00364077	1.39116	FAM49A	family with sequence similarity 49, member A	intracellular
8009301	1.03334	2.04676	10.484	5.09001	6.02949e-05	0.00274643	1.77109	PRKCA	protein kinase C, alpha	nucleotide binding /// inactivation of MAPK activity /// response to reactive oxygen species /// negative regulation of protein amino acid phosphorylation /// positive regulation of protein amino acid phosphorylation /// regulation of the force of heart contraction /// chondrocyte differentiation /// protein kinase C activity /// calcium-dependent protein kinase C activity /// protein binding ///…
7944049	1.02212	2.0309	8.92368	6.1822	5.45364e-06	0.000488403	4.13329	SIDT2	SID1 transmembrane family, member 2	membrane /// integral to membrane
8101429	1.02211	2.03089	6.94951	6.74641	1.66847e-06	0.00020978	5.29617	PLAC8	placenta-specific 8	---
8116998	1.02016	2.02815	9.56671	7.39082	4.54319e-07	8.177e-05	6.56973	JARID2	jumonji, AT rich interactive domain 2	negative regulation of transcription from RNA polymerase II promoter /// liver development /// DNA binding /// chromatin binding /// protein binding /// intracellular /// nucleus /// multicellular organismal development /// central nervous system development /// negative regulation of cell proliferation /// transcription repressor activity /// chromatin modification /// negative regulation of his…
7908758	1.01795	2.02504	9.02044	5.52802	2.26381e-05	0.00132942	2.73386	SHISA4	shisa homolog 4 (Xenopus laevis)	membrane /// integral to membrane
8045539	1.01414	2.0197	6.4476	5.89566	1.01088e-05	0.000746328	3.52663	KYNU	kynureninase (L-kynurenine hydrolase)	soluble fraction /// cytoplasm /// mitochondrion /// cytosol /// cytosol /// tryptophan catabolic process /// metabolic process /// NAD biosynthetic process /// hydrolase activity /// pyridine nucleotide biosynthetic process /// tryptophan catabolic process to kynurenine /// tryptophan catabolic process to acetyl-CoA /// NAD metabolic process /// quinolinate biosynthetic process /// pyridoxal pho…
7927732	1.01346	2.01874	9.42967	5.52545	2.27673e-05	0.00133231	2.72827	ARID5B	AT rich interactive domain 5B (MRF1-like)	kidney development /// DNA binding /// intracellular /// nucleus /// nitrogen compound metabolic process /// post-embryonic development /// fibroblast migration /// transcription repressor activity /// multicellular organism growth /// regulation of transcription /// negative regulation of transcription, DNA-dependent /// platelet-derived growth factor receptor signaling pathway /// muscle organ …
8043377	1.00919	2.01278	10.2207	5.25809	4.13093e-05	0.00208405	2.14261	INO80B /// WBP1	INO80 complex subunit B /// WW domain binding protein 1	cellular_component /// biological_process /// WW domain binding /// WW domain binding /// nucleus /// nucleolus /// zinc ion binding /// metal ion binding
7921099	1.0052	2.00722	8.45555	5.73048	1.44934e-05	0.000964967	3.17236	CRABP2	cellular retinoic acid binding protein 2	retinoic acid binding /// transporter activity /// retinoid binding /// nucleus /// cytoplasm /// regulation of transcription, DNA-dependent /// transport /// signal transduction /// lipid binding /// epidermis development /// retinal binding /// retinol binding /// embryonic forelimb morphogenesis /// retinoic acid metabolic process /// nucleus /// cytoplasm
7930162	1.00117	2.00162	9.07288	9.2804	1.37612e-08	5.87444e-06	9.95947	C10orf26	chromosome 10 open reading frame 26	membrane /// integral to membrane
8035445	1.00074	2.00102	9.41171	5.47728	2.53327e-05	0.00144188	2.62329	JUND	jun D proto-oncogene	chromatin /// osteoblast development /// transcription factor activity /// RNA polymerase II transcription factor activity /// protein binding /// nucleus /// regulation of transcription from RNA polymerase II promoter /// sequence-specific DNA binding /// positive regulation of osteoblast differentiation /// protein dimerization activity
8097252	0.99927	1.99899	6.8591	5.32314	3.57109e-05	0.0018696	2.28574	BBS12	Bardet-Biedl syndrome 12	protein binding /// ATP binding /// cellular protein metabolic process
7944339	0.993617	1.99117	8.099	5.14502	5.326e-05	0.00250127	1.89295	---	---	---
8012931	0.991397	1.98811	7.49773	4.42076	0.000277882	0.00833677	0.273488	TRIM16 /// FBXW10 /// CDRT1	tripartite motif-containing 16 /// F-box and WD repeat domain containing 10 /// CMT1A duplicated region transcript 1	molecular_function /// cellular_component /// biological_process /// DNA binding /// protein binding /// intracellular /// cytoplasm /// zinc ion binding /// transcription activator activity /// PML body /// interleukin-1 binding /// NACHT domain binding /// response to retinoic acid /// positive regulation of gene-specific transcription /// histone H3 acetylation /// histone H4 acetylation /// p…
8095545	0.990822	1.98732	8.86739	5.80425	1.23345e-05	0.000862818	3.33097	RUFY3	RUN and FYVE domain containing 3	multicellular organismal development /// nervous system development /// cell differentiation /// filopodium /// growth cone /// negative regulation of axonogenesis
8114814	0.990304	1.9866	10.5833	8.27973	8.27592e-08	2.15284e-05	8.22784	NR3C1	nuclear receptor subfamily 3, group C, member 1 (glucocorticoid receptor)	transcription factor activity /// glucocorticoid receptor activity /// steroid binding /// protein binding /// nucleus /// nucleolus /// cytoplasm /// mitochondrial matrix /// transcription, DNA-dependent /// regulation of transcription, DNA-dependent /// transcription from RNA polymerase II promoter /// signal transduction /// zinc ion binding /// chromatin modification /// sequence-specific DNA…
8056060	0.983148	1.97677	7.98065	6.44871	3.10075e-06	0.000328808	4.68798	BAZ2B	bromodomain adjacent to zinc finger domain, 2B	DNA binding /// protein binding /// nucleus /// zinc ion binding /// regulation of transcription /// metal ion binding
8140534	0.98256	1.97597	9.28067	4.4407	0.000265416	0.00809299	0.318356	SEMA3C	sema domain, immunoglobulin domain (Ig), short basic domain, secreted, (semaphorin) 3C	neural crest cell migration /// blood vessel remodeling /// receptor activity /// extracellular region /// extracellular space /// immune response /// heart development /// post-embryonic development /// membrane /// semaphorin receptor binding /// response to drug
8059111	0.98185	1.975	9.00432	7.74854	2.26071e-07	4.69145e-05	7.25077	ATG9A /// ABCB6	ATG9 autophagy related 9 homolog A (S. cerevisiae) /// ATP-binding cassette, sub-family B (MDR/TAP), member 6	nucleotide binding /// ATP binding /// mitochondrion /// mitochondrial envelope /// mitochondrial outer membrane /// transport /// cellular iron ion homeostasis /// membrane /// integral to membrane /// ATPase activity /// ATPase activity, coupled to transmembrane movement of substances /// ATP-binding cassette (ABC) transporter complex /// transmembrane transport /// autophagic vacuole formation…
8008263	0.979734	1.9721	8.42614	4.51496	0.000223733	0.00721022	0.485441	PDK2	pyruvate dehydrogenase kinase, isozyme 2	two-component sensor activity /// nucleotide binding /// protein kinase activity /// pyruvate dehydrogenase (acetyl-transferring) kinase activity /// ATP binding /// nucleus /// nucleolus /// mitochondrion /// mitochondrial matrix /// carbohydrate metabolic process /// glucose metabolic process /// signal transduction /// transferase activity /// peptidyl-histidine phosphorylation /// protein com…
8068494	0.977976	1.9697	7.85556	6.31655	4.09802e-06	0.000396662	4.41409	---	---	---
7975851	0.977971	1.96969	7.97936	6.95731	1.0833e-06	0.000153059	5.71952	C14orf179	chromosome 14 open reading frame 179	---
7950810	0.977846	1.96952	6.47703	8.15009	1.05399e-07	2.61902e-05	7.99313	SYTL2	synaptotagmin-like 2	phosphatidylserine binding /// protein binding /// phosphatidylinositol-4,5-bisphosphate binding /// membrane fraction /// cytoplasm /// plasma membrane /// intracellular protein transport /// exocytosis /// vesicle docking during exocytosis /// zinc ion binding /// vesicle-mediated transport /// Rab GTPase binding /// extrinsic to plasma membrane /// neurexin binding /// melanosome /// exocytic …
7973618	0.977489	1.96904	9.63831	5.22212	4.47814e-05	0.00221554	2.06331	IRF9	interferon regulatory factor 9	transcription factor activity /// protein binding /// nucleus /// cytoplasm /// regulation of transcription, DNA-dependent /// transcription from RNA polymerase II promoter /// cell surface receptor linked signaling pathway /// response to virus /// identical protein binding /// type I interferon biosynthetic process /// transcription factor activity /// nucleus /// cytoplasm /// cell surface rec…
8175393	0.975422	1.96622	6.92896	4.35925	0.000320194	0.00922275	0.135004	ARHGEF6	Rac/Cdc42 guanine nucleotide exchange factor (GEF) 6	guanyl-nucleotide exchange factor activity /// Rho guanyl-nucleotide exchange factor activity /// GTPase activator activity /// intracellular /// cytosol /// apoptosis /// apoptosis /// JNK cascade /// induction of apoptosis by extracellular signals /// regulation of Rho protein signal transduction /// guanyl-nucleotide exchange factor activity
8081375	0.974046	1.96434	9.36579	7.88677	1.73425e-07	3.82419e-05	7.50896	FAM55C	family with sequence similarity 55, member C	extracellular region
7972826	0.967016	1.95479	8.20564	5.48039	2.51585e-05	0.00143688	2.63007	C13orf29	chromosome 13 open reading frame 29	---
8038117	0.963	1.94936	8.78823	9.22051	1.52673e-08	6.35445e-06	9.85974	DBP	D site of albumin promoter (albumin D-box) binding protein	transcription factor activity /// RNA polymerase II transcription factor activity /// nucleus /// regulation of transcription from RNA polymerase II promoter /// regulation of cell proliferation /// sequence-specific DNA binding /// protein dimerization activity /// rhythmic process
8164464	0.961676	1.94757	8.38964	6.43284	3.20596e-06	0.000332551	4.65521	ZER1	zer-1 homolog (C. elegans)	ubiquitin-protein ligase activity /// protein binding /// Cul2-RING ubiquitin ligase complex /// regulation of ubiquitin-protein ligase activity /// modification-dependent protein catabolic process
8041197	0.961525	1.94737	10.1593	4.74958	0.000130671	0.00485056	1.01212	YPEL5	yippee-like 5 (Drosophila)	---
8106393	0.959663	1.94486	9.19918	5.6993	1.55193e-05	0.000999972	3.10511	F2R	coagulation factor II (thrombin) receptor	activation of MAPKK activity /// connective tissue replacement during inflammatory response /// receptor activity /// G-protein coupled receptor activity /// G-protein coupled receptor activity /// receptor binding /// protein binding /// extracellular region /// Golgi apparatus /// plasma membrane /// plasma membrane /// integral to plasma membrane /// caveola /// activation of caspase activity …
7902282	0.95678	1.94097	8.64281	8.76464	3.41497e-08	1.14857e-05	9.08446	HHLA3	HERV-H LTR-associating 3	protein binding
8088550	0.952411	1.9351	8.32979	7.41031	4.37173e-07	7.95439e-05	6.60732	PRICKLE2	prickle homolog 2 (Drosophila)	nucleus /// cytoplasm /// zinc ion binding /// membrane /// apicolateral plasma membrane /// lateral plasma membrane /// nuclear membrane /// establishment or maintenance of epithelial cell apical/basal polarity /// metal ion binding
8120927	0.951641	1.93407	7.68146	5.64657	1.74259e-05	0.00109478	2.99116	RWDD2A	RWD domain containing 2A	---
8103601	0.950727	1.93285	9.29266	5.78613	1.28322e-05	0.00088316	3.29207	DDX60L	DEAD (Asp-Glu-Ala-Asp) box polypeptide 60-like	nucleotide binding /// RNA binding /// helicase activity /// ATP binding /// ATP-dependent helicase activity /// hydrolase activity
8069582	0.94828	1.92957	5.29285	5.70933	1.51813e-05	0.000991162	3.12676	PRSS7 /// TMPRSS15	protease, serine, 7 (enterokinase) /// transmembrane protease, serine 15	serine-type endopeptidase activity /// scavenger receptor activity /// brush border /// proteolysis /// peptidase activity /// membrane /// integral to membrane
7984103	0.946488	1.92718	9.82711	7.61422	2.93215e-07	5.77703e-05	6.99723	LACTB	lactamase, beta	mitochondrion /// hydrolase activity
7938812	0.946137	1.92671	7.29616	6.99509	1.00327e-06	0.000145846	5.79471	TMEM86A /// IGSF22	transmembrane protein 86A /// immunoglobulin superfamily, member 22	membrane /// integral to membrane
7913655	0.945048	1.92525	11.3712	10.0866	3.54382e-09	1.92231e-06	11.2556	ID3	inhibitor of DNA binding 3, dominant negative helix-loop-helix protein	negative regulation of transcription from RNA polymerase II promoter /// transcription corepressor activity /// nucleus /// regulation of DNA replication /// multicellular organismal development /// heart development /// transcription factor binding /// response to wounding /// negative regulation of transcription /// transcription repressor activity /// protein domain specific binding /// neuron…
7908178	0.944931	1.9251	7.85319	6.63102	2.11853e-06	0.000253743	5.0619	C1orf26	chromosome 1 open reading frame 26	---
8095870	0.944362	1.92434	9.08315	4.85018	0.000103876	0.00406913	1.23715	CCNG2	cyclin G2	cell cycle checkpoint /// cytoplasm /// cell cycle /// mitosis /// cell division
8112033	0.935898	1.91308	7.85086	4.77208	0.000124126	0.00465621	1.06249	ARL15	ADP-ribosylation factor-like 15	nucleotide binding /// GTP binding
7968577	0.934598	1.91136	8.17765	5.29653	3.79007e-05	0.0019475	2.22725	NBEA	neurobeachin	protein binding /// cytoplasm /// trans-Golgi network /// cytosol /// plasma membrane /// protein localization /// endomembrane system /// protein kinase binding
7969677	0.934152	1.91077	11.2188	7.16022	7.19018e-07	0.000114551	6.12084	MBNL2	muscleblind-like 2 (Drosophila)	RNA binding /// nucleus /// cytoplasm /// mRNA processing /// zinc ion binding /// regulation of RNA splicing /// metal ion binding
8042867	0.932791	1.90897	10.2899	4.98244	7.69093e-05	0.00330089	1.53211	INO80B /// WBP1	INO80 complex subunit B /// WW domain binding protein 1	cellular_component /// biological_process /// WW domain binding /// WW domain binding /// nucleus /// nucleolus /// zinc ion binding /// metal ion binding
8008885	0.931268	1.90695	9.05458	4.82601	0.000109756	0.00422001	1.18315	MIR21	microRNA 21	---
7964119	0.926194	1.90026	9.71136	5.37579	3.175e-05	0.00171065	2.4013	STAT2	signal transducer and activator of transcription 2, 113kDa	transcription factor activity /// signal transducer activity /// hematopoietin/interferon-class (D200-domain) cytokine receptor signal transducer activity /// calcium ion binding /// protein binding /// nucleus /// cytoplasm /// regulation of transcription from RNA polymerase II promoter /// signal transduction /// JAK-STAT cascade /// response to virus /// interspecies interaction between organi…
8121749	0.925352	1.89915	6.51375	7.18488	6.84335e-07	0.000110613	6.16922	GJA1	gap junction protein, alpha 1, 43kDa	Golgi membrane /// signal transducer activity /// protein binding /// Golgi apparatus /// plasma membrane /// plasma membrane /// integral to plasma membrane /// gap junction /// connexon complex /// transport /// muscle contraction /// cell-cell signaling /// heart development /// ion transmembrane transporter activity /// gap junction assembly /// transmembrane transporter activity /// cell jun…
8063382	0.923603	1.89685	8.03377	9.35711	1.20547e-08	5.28138e-06	10.0865	SNAI1	snail homolog 1 (Drosophila)	DNA binding /// protein binding /// intracellular /// nucleus /// multicellular organismal development /// zinc ion binding /// hair follicle morphogenesis /// metal ion binding
7905938	0.92212	1.8949	11.2183	6.71027	1.79769e-06	0.000221903	5.22301	RAG1AP1	recombination activating gene 1 activating protein 1	nucleus /// DNA recombination /// membrane /// integral to membrane /// positive regulation of gene expression, epigenetic
8140739	0.921575	1.89418	6.87781	4.76453	0.000126286	0.00471405	1.04558	TP53TG1	TP53 target 1 (non-protein coding)	molecular_function /// nucleus /// response to stress /// response to DNA damage stimulus
7963054	0.920005	1.89212	10.5012	5.83446	1.15482e-05	0.000826924	3.39574	TUBA1A	tubulin, alpha 1a	nucleotide binding /// GTPase activity /// structural molecule activity /// GTP binding /// cytosol /// cytoplasmic microtubule /// microtubule-based movement /// protein domain specific binding /// protein polymerization /// protein complex
8092095	0.918942	1.89073	9.85126	6.52859	2.6227e-06	0.000292965	4.85237	TNIK	TRAF2 and NCK interacting kinase	nucleotide binding /// protein serine/threonine kinase activity /// protein serine/threonine kinase activity /// small GTPase regulator activity /// protein binding /// ATP binding /// cellular_component /// nucleus /// cytoplasm /// protein amino acid phosphorylation /// response to stress /// intracellular protein kinase cascade /// JNK cascade /// Wnt receptor signaling pathway /// transferase…
7974689	0.918543	1.89021	7.29286	4.39836	0.000292601	0.00863717	0.223047	DACT1	dapper, antagonist of beta-catenin, homolog 1 (Xenopus laevis)	protein binding /// nucleus /// cytoplasm /// multicellular organismal development /// Wnt receptor signaling pathway /// nucleus /// cytoplasm
7994981	0.918375	1.88999	9.2692	5.20272	4.67753e-05	0.00227701	2.0205	ORAI3	ORAI calcium release-activated calcium modulator 3	membrane /// integral to membrane
8116831	0.914371	1.88475	8.08338	4.48887	0.000237569	0.00752648	0.426743	TFAP2A /// LOC100130275	transcription factor AP-2 alpha (activating enhancer binding protein 2 alpha) /// hypothetical protein LOC100130275	DNA binding /// transcription factor activity /// transcription coactivator activity /// protein binding /// nucleus /// regulation of transcription from RNA polymerase II promoter /// ectoderm development /// anterior neuropore closure /// protein dimerization activity /// embryonic cranial skeleton morphogenesis /// skeletal system morphogenesis /// transcription factor activity /// regulation …
8127854	0.913677	1.88384	10.6482	5.15978	5.15196e-05	0.00244581	1.92559	ME1	malic enzyme 1, NADP(+)-dependent, cytosolic	malic enzyme activity /// malate dehydrogenase (oxaloacetate-decarboxylating) (NADP+) activity /// malate dehydrogenase (oxaloacetate-decarboxylating) (NADP+) activity /// binding /// soluble fraction /// nucleus /// nucleolus /// cytoplasm /// cytosol /// carbohydrate metabolic process /// malate metabolic process /// NADP biosynthetic process /// electron carrier activity /// response to hormon…
8000574	0.91341	1.88349	7.92315	6.33198	3.96624e-06	0.000387276	4.4462	NUPR1	nuclear protein, transcriptional regulator, 1	molecular_function /// nucleus /// induction of apoptosis /// cell growth /// acute inflammatory response /// response to toxin /// DNA damage response, signal transduction by p53 class mediator resulting in induction of apoptosis /// negative regulation of fibroblast proliferation
8055016	0.911264	1.88069	7.80024	4.39278	0.000296385	0.00871104	0.210489	---	---	---
8015914	0.910219	1.87933	8.83566	5.49853	2.41662e-05	0.00139456	2.66964	HDAC5	histone deacetylase 5	histone deacetylase complex /// negative regulation of transcription from RNA polymerase II promoter /// histone deacetylase activity /// protein binding /// nucleus /// cytoplasm /// chromatin organization /// chromatin remodeling /// chromatin silencing /// inflammatory response /// transcription factor binding /// positive regulation of gene-specific transcription from RNA polymerase II promot…
7986383	0.907785	1.87616	7.18393	6.67913	1.91733e-06	0.000235576	5.15981	IGF1R	insulin-like growth factor 1 receptor	nucleotide binding /// protein tyrosine kinase activity /// receptor activity /// insulin-like growth factor receptor activity /// insulin receptor binding /// protein binding /// insulin-like growth factor binding /// ATP binding /// microsome /// integral to plasma membrane /// anti-apoptosis /// immune response /// signal transduction /// axonogenesis /// brain development /// positive regulat…
7967486	0.903156	1.87015	7.29605	5.75061	1.38685e-05	0.000931009	3.2157	CCDC92	coiled-coil domain containing 92	---
8066431	0.900895	1.86722	9.51123	7.61118	2.94955e-07	5.77713e-05	6.99146	ADA	adenosine deaminase	response to hypoxia /// in utero embryonic development /// trophectodermal cell differentiation /// purine nucleoside binding /// liver development /// placenta development /// germinal center B cell differentiation /// positive regulation of germinal center formation /// negative regulation of leukocyte migration /// negative regulation of mature B cell apoptosis /// adenosine deaminase activity…
8011884	0.898565	1.86421	8.63659	8.13619	1.08183e-07	2.63867e-05	7.96782	NLRP1 /// LOC728392	NLR family, pyrin domain containing 1 /// hypothetical protein LOC728392	nucleotide binding /// protein binding /// ATP binding /// intracellular /// nucleus /// cytoplasm /// induction of apoptosis /// induction of apoptosis /// activation of caspase activity /// activation of caspase activity /// defense response /// caspase activator activity /// enzyme binding /// protein domain specific binding /// regulation of apoptosis /// neuron apoptosis
8149248	0.897549	1.8629	6.75054	4.42773	0.000273457	0.0082565	0.289179	---	---	---
8047763	0.897418	1.86273	9.04841	5.77299	1.3206e-05	0.000898834	3.26383	---	---	---
7926679	0.896604	1.86168	8.30249	5.59159	1.96706e-05	0.0011952	2.87202	KIAA1217	KIAA1217	molecular_function /// cytoplasm /// multicellular organismal development /// embryonic skeletal system development
8117219	0.894047	1.85838	10.5369	7.17351	7.001e-07	0.000112073	6.14693	ACOT13	acyl-CoA thioesterase 13	cytoplasm /// mitochondrion /// acyl-CoA thioesterase activity /// hydrolase activity /// protein homotetramerization
8127094	0.892898	1.8569	6.29624	6.83489	1.39095e-06	0.00018234	5.47456	GSTA4	glutathione S-transferase alpha 4	glutathione transferase activity /// cytoplasm /// metabolic process /// transferase activity
8130528	0.890045	1.85323	7.98244	6.10579	6.42284e-06	0.000542795	3.97252	RSPH3	radial spoke 3 homolog (Chlamydomonas)	---
8076355	0.886767	1.84903	8.16111	4.54247	0.000210027	0.00687797	0.5473	PMM1	phosphomannomutase 1	phosphomannomutase activity /// cytoplasm /// mannose metabolic process /// metabolic process /// isomerase activity /// mannose biosynthetic process /// phosphomannomutase activity
7895831	0.885331	1.84719	8.58544	4.42854	0.00027295	0.0082547	0.290992	---	---	---
7901931	0.875098	1.83413	8.05155	6.26549	4.56691e-06	0.000429561	4.30765	EFCAB7	EF-hand calcium binding domain 7	calcium ion binding
7944751	0.874153	1.83293	7.42656	6.02834	7.58667e-06	0.000614631	3.80881	C11orf63	chromosome 11 open reading frame 63	---
7914557	0.873062	1.83155	7.77204	6.48224	2.88998e-06	0.000313079	4.7571	SYNC	syncoilin, intermediate filament protein	structural molecule activity /// protein binding /// cytoplasm /// cytosol /// intermediate filament /// Z disc /// sarcolemma /// intermediate filament-based process /// synapse /// perinuclear region of cytoplasm
7897236	0.872915	1.83136	8.08189	8.57509	4.80951e-08	1.46919e-05	8.75357	KCNAB2	potassium voltage-gated channel, shaker-related subfamily, beta member 2	voltage-gated ion channel activity /// voltage-gated potassium channel activity /// cytoplasm /// ion transport /// potassium ion transport /// potassium channel regulator activity /// integral to membrane /// oxidoreductase activity /// juxtaparanode region of axon /// transmembrane transport /// oxidation reduction /// potassium ion binding
7978644	0.871695	1.82981	10.585	6.23296	4.89421e-06	0.000450173	4.23964	NFKBIA	nuclear factor of kappa light polypeptide gene enhancer in B-cells inhibitor, alpha	protein import into nucleus, translocation /// protein binding /// nucleus /// cytoplasm /// cytosol /// apoptosis /// anti-apoptosis /// cytoplasmic sequestering of NF-kappaB /// transcription factor binding /// nuclear localization sequence binding /// positive regulation of gene-specific transcription from RNA polymerase II promoter /// negative regulation of macrophage derived foam cell diffe…
8006746	0.868887	1.82625	8.98255	6.37674	3.60823e-06	0.00036079	4.53912	LOC100134348 /// TBC1D3P2 /// TBC1D3F /// TBC1D3B /// TBC1D3C /// TBC1D3G /// TBC1D3 /// TBC1D3H	similar to TBC1 domain family member 3 (Rab GTPase-activating protein PRC17) (Prostate cancer gene 17 protein) (TRE17 alpha protein) /// TBC1 domain family, member 3 pseudogene 2 /// TBC1 domain family, member 3F /// TBC1 domain family, member 3B /// TBC1 domain family, member 3C /// TBC1 domain family, member 3G /// TBC1 domain family, member 3 /// TBC1 domain family, member 3H	GTPase activator activity /// Rab GTPase activator activity /// intracellular /// regulation of Rab GTPase activity
7999364	0.866673	1.82345	6.43349	6.59699	2.27389e-06	0.000267539	4.99245	GRIN2A	glutamate receptor, ionotropic, N-methyl D-aspartate 2A	regulation of action potential /// startle response /// response to amphetamine /// receptor activity /// N-methyl-D-aspartate selective glutamate receptor activity /// transporter activity /// extracellular-glutamate-gated ion channel activity /// calcium channel activity /// protein binding /// plasma membrane /// integral to plasma membrane /// transport /// ion transport /// calcium ion trans…
8014603	0.866018	1.82263	8.8903	6.81769	1.4409e-06	0.000187413	5.43996	LOC100134348 /// TBC1D3P2 /// TBC1D3F /// TBC1D3C /// TBC1D3G /// TBC1D3B /// TBC1D3 /// TBC1D3H	similar to TBC1 domain family member 3 (Rab GTPase-activating protein PRC17) (Prostate cancer gene 17 protein) (TRE17 alpha protein) /// TBC1 domain family, member 3 pseudogene 2 /// TBC1 domain family, member 3F /// TBC1 domain family, member 3C /// TBC1 domain family, member 3G /// TBC1 domain family, member 3B /// TBC1 domain family, member 3 /// TBC1 domain family, member 3H	GTPase activator activity /// Rab GTPase activator activity /// intracellular /// regulation of Rab GTPase activity
8048523	0.865478	1.82194	8.0931	7.32833	5.1414e-07	8.87011e-05	6.44885	DNAJB2	DnaJ (Hsp40) homolog, subfamily B, member 2	protein folding /// response to unfolded protein /// negative regulation of cell proliferation /// negative regulation of cell growth /// heat shock protein binding /// unfolded protein binding
8108447	0.86392	1.81998	10.1656	6.32472	4.02773e-06	0.000390995	4.43108	CXXC5	CXXC finger 5	DNA binding /// signal transducer activity /// nucleus /// cytoplasm /// zinc ion binding /// positive regulation of I-kappaB kinase/NF-kappaB cascade /// metal ion binding
7931168	0.863757	1.81977	8.11963	4.85186	0.000103479	0.00406315	1.24091	ACADSB /// ACADSB	acyl-Coenzyme A dehydrogenase, short/branched chain /// acyl-CoA dehydrogenase, short/branched chain	acyl-CoA dehydrogenase activity /// mitochondrion /// mitochondrial matrix /// lipid metabolic process /// fatty acid metabolic process /// short-branched-chain-acyl-CoA dehydrogenase activity /// FAD binding /// oxidation reduction /// mitochondrion /// fatty acid metabolic process /// electron carrier activity
8132218	0.863259	1.81914	7.17416	6.67041	1.95229e-06	0.000236383	5.14208	BBS9	Bardet-Biedl syndrome 9	molecular_function /// cytoplasm /// microtubule organizing center /// cytoskeleton /// plasma membrane /// cilium /// visual perception /// BBSome /// fat cell differentiation /// response to stimulus /// cilium membrane /// centrosome
8139270	0.858011	1.81254	8.03463	5.14839	5.28574e-05	0.00248938	1.9004	LOC100132214 /// RASA4 /// RASA4P /// RASA4B	similar to calcium-promoted Ras inactivator /// RAS p21 protein activator 4 /// RAS p21 protein activator 4 pseudogene /// RAS p21 protein activator 4B	GTPase activator activity /// intracellular /// cytoplasm /// cytosol /// plasma membrane /// metal ion binding /// regulation of small GTPase mediated signal transduction /// intracellular signaling cascade /// zinc ion binding
8154381	0.857647	1.81208	10.8834	4.69608	0.000147676	0.00533316	0.892214	C9orf150	chromosome 9 open reading frame 150	---
7996807	0.857083	1.81137	7.00859	8.31298	7.78099e-08	2.08305e-05	8.28764	ZFP90	zinc finger protein 90 homolog (mouse)	DNA binding /// intracellular /// nucleus /// regulation of transcription, DNA-dependent /// proteolysis /// metallopeptidase activity /// zinc ion binding /// metal ion binding
7967030	0.849427	1.80179	10.4015	4.81874	0.000111591	0.00427086	1.16688	RNU4-1B /// RNU4-1	RNA, U4 small nuclear 1B /// RNA, U4 small nuclear 1	---
7975799	0.849194	1.80149	7.88819	6.94881	1.10219e-06	0.00015485	5.70259	FLVCR2	feline leukemia virus subgroup C cellular receptor family, member 2	plasma membrane /// integral to membrane /// transmembrane transport /// transport
7958174	0.846557	1.7982	12.6018	6.44595	3.1188e-06	0.000329672	4.68228	TXNRD1	thioredoxin reductase 1	mesoderm formation /// thioredoxin-disulfide reductase activity /// nucleus /// cytoplasm /// cytosol /// transport /// signal transduction /// gastrulation /// cell proliferation /// electron carrier activity /// protein disulfide oxidoreductase activity /// oxidoreductase activity /// electron transport chain /// cell redox homeostasis /// FAD binding /// NADP or NADPH binding /// thioredoxin-d…
7941961	0.846137	1.79768	9.46707	5.85087	1.11429e-05	0.000803083	3.43087	ALDH3B1 /// ALDH3B2	aldehyde dehydrogenase 3 family, member B1 /// aldehyde dehydrogenase 3 family, member B2	3-chloroallyl aldehyde dehydrogenase activity /// aldehyde dehydrogenase [NAD(P)+] activity /// alcohol metabolic process /// cellular aldehyde metabolic process /// lipid metabolic process /// oxidoreductase activity /// oxidation reduction
7928354	0.845886	1.79737	8.5641	6.08657	6.69341e-06	0.000562099	3.93196	FAM149B1	family with sequence similarity 149, member B1	---
8004266	0.844968	1.79623	8.68598	5.68996	1.58406e-05	0.00101682	3.08496	SLC16A13	solute carrier family 16, member 13 (monocarboxylic acid transporter 13)	plasma membrane /// symporter activity /// integral to membrane /// transmembrane transport /// transport
7920664	0.844776	1.79599	6.93148	5.07404	6.25101e-05	0.00282799	1.73565	THBS3	thrombospondin 3	structural molecule activity /// calcium ion binding /// protein binding /// extracellular region /// cell adhesion /// cell-matrix adhesion /// platelet alpha granule lumen /// perinuclear region of cytoplasm /// calcium ion binding /// extracellular region /// cell-matrix adhesion
7949746	0.840504	1.79068	9.79193	4.61259	0.000178803	0.00612512	0.704856	POLD4	polymerase (DNA-directed), delta 4	positive regulation of endothelial cell proliferation /// DNA-directed DNA polymerase activity /// protein binding /// nucleus /// nucleoplasm /// DNA replication /// DNA-dependent DNA replication /// nucleotide-excision repair, DNA gap filling /// transferase activity /// nucleotidyltransferase activity /// DNA-directed DNA polymerase activity /// nucleus
7939642	0.839667	1.78964	7.86376	4.85246	0.000103337	0.00406236	1.24226	CREB3L1	cAMP responsive element binding protein 3-like 1	transcription factor activity /// nucleus /// endoplasmic reticulum /// endoplasmic reticulum membrane /// regulation of transcription, DNA-dependent /// response to unfolded protein /// membrane /// integral to membrane /// sequence-specific DNA binding /// protein dimerization activity
8078014	0.838233	1.78786	11.2204	7.05425	8.90024e-07	0.000134096	5.912	SLC6A6	solute carrier family 6 (neurotransmitter transporter, taurine), member 6	beta-alanine transmembrane transporter activity /// beta-alanine transport /// taurine:sodium symporter activity /// plasma membrane /// integral to plasma membrane /// cellular amino acid metabolic process /// transport /// neurotransmitter transport /// amino acid transport /// amino acid transmembrane transporter activity /// symporter activity /// taurine transport /// integral to membrane //…
8046020	0.838106	1.7877	8.52187	5.4692	2.57911e-05	0.00145554	2.60565	SCN2A	sodium channel, voltage-gated, type II, alpha subunit	voltage-gated sodium channel complex /// voltage-gated ion channel activity /// voltage-gated sodium channel activity /// membrane fraction /// integral to plasma membrane /// ion transport /// sodium ion transport /// apoptosis /// nervous system development /// intercalated disc /// membrane /// T-tubule /// axon /// node of Ranvier /// myelination /// transmembrane transport /// voltage-gated …
7976084	0.838043	1.78762	7.02749	6.47394	2.94073e-06	0.000315863	4.74001	SPATA7	spermatogenesis associated 7	spermatogenesis /// visual perception /// response to stimulus
8014420	0.836871	1.78617	8.86547	6.20745	5.16755e-06	0.000471282	4.18624	LOC100134348 /// TBC1D3P2 /// TBC1D3F /// TBC1D3B /// TBC1D3C /// TBC1D3G /// TBC1D3 /// TBC1D3H	similar to TBC1 domain family member 3 (Rab GTPase-activating protein PRC17) (Prostate cancer gene 17 protein) (TRE17 alpha protein) /// TBC1 domain family, member 3 pseudogene 2 /// TBC1 domain family, member 3F /// TBC1 domain family, member 3B /// TBC1 domain family, member 3C /// TBC1 domain family, member 3G /// TBC1 domain family, member 3 /// TBC1 domain family, member 3H	GTPase activator activity /// Rab GTPase activator activity /// intracellular /// regulation of Rab GTPase activity
8139500	0.836645	1.78589	9.82446	4.49093	0.000236446	0.0075052	0.431376	TNS3	tensin 3	protein binding /// nucleus /// nucleolus /// cytoplasm /// plasma membrane /// focal adhesion /// positive regulation of cell proliferation /// cell migration /// cell junction /// lung alveolus development /// focal adhesion
7993281	0.834283	1.78297	8.90917	5.0453	6.67056e-05	0.00297259	1.67186	SNX29	sorting nexin 29	protein binding /// cell communication /// phosphoinositide binding
8007446	0.832999	1.78138	10.689	4.59376	0.000186697	0.00629771	0.662558	IFI35	interferon-induced protein 35	protein binding /// nucleus /// immune response /// response to virus
8180232	0.832637	1.78094	7.13545	6.98379	1.02655e-06	0.000146699	5.77224	---	---	---
7913582	0.831231	1.7792	9.34991	6.39285	3.48763e-06	0.000352972	4.57251	ZNF436 /// C1orf213	zinc finger protein 436 /// chromosome 1 open reading frame 213	DNA binding /// intracellular /// nucleus /// regulation of transcription, DNA-dependent /// zinc ion binding /// metal ion binding
7963631	0.830105	1.77781	8.75731	4.45143	0.000258938	0.00794003	0.342515	RARG	retinoic acid receptor, gamma	negative regulation of transcription from RNA polymerase II promoter /// DNA binding /// transcription factor activity /// steroid hormone receptor activity /// retinoic acid receptor activity /// protein binding /// nucleus /// transcription factor complex /// regulation of transcription, DNA-dependent /// zinc ion binding /// negative regulation of cell proliferation /// regulation of cell size…
7958620	0.828951	1.77639	7.43509	5.3058	3.71224e-05	0.00191935	2.24764	IFT81	intraflagellar transport 81 homolog (Chlamydomonas)	multicellular organismal development /// spermatogenesis /// cell differentiation
8124040	0.828925	1.77636	8.95282	5.63892	1.77219e-05	0.0011071	2.9746	ATXN1	ataxin 1	RNA binding /// protein binding /// nucleus /// nucleoplasm /// nucleolus /// cytoplasm /// RNA processing /// protein C-terminus binding /// cell death /// poly(U) RNA binding /// nuclear matrix /// negative regulation of transcription /// transcription repressor activity /// poly(G) RNA binding /// nuclear RNA export factor complex /// nuclear inclusion body /// identical protein binding /// in…
8014633	0.826601	1.7735	8.90547	6.17096	5.58629e-06	0.000498678	4.10967	TBC1D3F /// TBC1D3B /// TBC1D3C /// TBC1D3G /// TBC1D3 /// TBC1D3H	TBC1 domain family, member 3F /// TBC1 domain family, member 3B /// TBC1 domain family, member 3C /// TBC1 domain family, member 3G /// TBC1 domain family, member 3 /// TBC1 domain family, member 3H	GTPase activator activity /// Rab GTPase activator activity /// intracellular /// regulation of Rab GTPase activity
8120719	0.825036	1.77158	10.6195	6.97753	1.03968e-06	0.000147942	5.75979	CD109	CD109 molecule	serine-type endopeptidase inhibitor activity /// protein binding /// extracellular region /// extracellular space /// plasma membrane /// anchored to membrane
8058570	0.824991	1.77152	7.61793	6.13652	6.01337e-06	0.00052058	4.03726	C2orf67	chromosome 2 open reading frame 67	---
8141803	0.823119	1.76923	8.03832	8.85826	2.8885e-08	1.03417e-05	9.24601	POLR2J4 /// LOC100286937 /// LOC100132214 /// RASA4 /// RASA4P /// RASA4B	polymerase (RNA) II (DNA directed) polypeptide J4, pseudogene /// similar to HSPC047 protein /// similar to calcium-promoted Ras inactivator /// RAS p21 protein activator 4 /// RAS p21 protein activator 4 pseudogene /// RAS p21 protein activator 4B	GTPase activator activity /// intracellular /// cytoplasm /// cytosol /// plasma membrane /// metal ion binding /// regulation of small GTPase mediated signal transduction /// intracellular signaling cascade /// zinc ion binding
8003607	0.819578	1.76489	8.29371	8.69278	3.88625e-08	1.23238e-05	8.95961	C17orf97	chromosome 17 open reading frame 97	---
8019716	0.818745	1.76387	8.92082	5.96801	8.642e-06	0.000670752	3.68077	LOC100134348 /// TBC1D3P2 /// TBC1D3F /// TBC1D3B /// TBC1D3C /// TBC1D3G /// TBC1D3 /// TBC1D3H	similar to TBC1 domain family member 3 (Rab GTPase-activating protein PRC17) (Prostate cancer gene 17 protein) (TRE17 alpha protein) /// TBC1 domain family, member 3 pseudogene 2 /// TBC1 domain family, member 3F /// TBC1 domain family, member 3B /// TBC1 domain family, member 3C /// TBC1 domain family, member 3G /// TBC1 domain family, member 3 /// TBC1 domain family, member 3H	GTPase activator activity /// Rab GTPase activator activity /// intracellular /// regulation of Rab GTPase activity
8176133	0.818076	1.76305	11.2722	4.83498	0.000107534	0.00415379	1.2032	G6PD	glucose-6-phosphate dehydrogenase	cytokine production /// glucose-6-phosphate dehydrogenase activity /// glucose-6-phosphate dehydrogenase activity /// binding /// glucose binding /// glucose binding /// cytoplasm /// centrosome /// cytosol /// cytosol /// carbohydrate metabolic process /// glucose metabolic process /// pentose-phosphate shunt /// lipid metabolic process /// cholesterol biosynthetic process /// NADPH regeneration…
8014437	0.816765	1.76145	8.86891	6.1543	5.78876e-06	0.000507233	4.07468	LOC100134348 /// TBC1D3P2 /// TBC1D3F /// TBC1D3B /// TBC1D3C /// TBC1D3G /// TBC1D3 /// TBC1D3H	similar to TBC1 domain family member 3 (Rab GTPase-activating protein PRC17) (Prostate cancer gene 17 protein) (TRE17 alpha protein) /// TBC1 domain family, member 3 pseudogene 2 /// TBC1 domain family, member 3F /// TBC1 domain family, member 3B /// TBC1 domain family, member 3C /// TBC1 domain family, member 3G /// TBC1 domain family, member 3 /// TBC1 domain family, member 3H	GTPase activator activity /// Rab GTPase activator activity /// intracellular /// regulation of Rab GTPase activity
7979984	0.812932	1.75678	8.87636	4.73158	0.000136158	0.00500402	0.971799	ZFYVE1	zinc finger, FYVE domain containing 1	phosphatidylinositol binding /// phosphatidylinositol-3,4,5-trisphosphate binding /// endoplasmic reticulum /// Golgi apparatus /// Golgi stack /// zinc ion binding /// phosphatidylinositol-3,4-bisphosphate binding /// metal ion binding /// perinuclear region of cytoplasm
8012257	0.808847	1.75181	10.9372	5.73369	1.43921e-05	0.000964216	3.17926	TP53	tumor protein p53	protein import into nucleus, translocation /// negative regulation of transcription from RNA polymerase II promoter /// DNA strand annealing activity /// in utero embryonic development /// release of cytochrome c from mitochondria /// T cell proliferation during immune response /// B cell lineage commitment /// response to tumor cell /// T cell lineage commitment /// DNA binding /// chromatin bin…
8097753	0.808327	1.75118	7.98854	5.70787	1.523e-05	0.000992105	3.12362	DCLK2	doublecortin-like kinase 2	nucleotide binding /// protein serine/threonine kinase activity /// ATP binding /// protein amino acid phosphorylation /// transferase activity /// intracellular signaling cascade
8150698	0.807683	1.7504	11.4688	4.67347	0.00015552	0.00554429	0.841503	SNAI2	snail homolog 2 (Drosophila)	negative regulation of transcription from RNA polymerase II promoter /// DNA binding /// intracellular /// nucleus /// multicellular organismal development /// ectoderm and mesoderm interaction /// zinc ion binding /// response to radiation /// regulation of transcription /// metal ion binding /// nucleus
7954055	0.807495	1.75017	7.75896	5.72876	1.45483e-05	0.000964967	3.16865	APOLD1	apolipoprotein L domain containing 1	angiogenesis /// response to hypoxia /// extracellular region /// plasma membrane /// lipid transport /// multicellular organismal development /// lipid binding /// integral to membrane /// cell differentiation /// endothelial cell activation /// lipoprotein metabolic process /// regulation of endothelial cell differentiation
7980537	0.807267	1.74989	6.15617	5.22733	4.42599e-05	0.00220287	2.07482	STON2	stonin 2	protein binding /// nucleolus /// cytoplasm /// intracellular protein transport /// membrane /// regulation of endocytosis /// clathrin adaptor complex /// cytoplasm
8094476	0.806392	1.74883	8.47817	6.13606	6.01926e-06	0.00052058	4.0363	TBC1D19	TBC1 domain family, member 19	GTPase activator activity /// Rab GTPase activator activity /// intracellular /// regulation of Rab GTPase activity
8096919	0.804609	1.74667	7.15753	5.01107	7.2079e-05	0.0031455	1.59579	ALPK1	alpha-kinase 1	protein serine/threonine kinase activity /// ATP binding /// protein amino acid phosphorylation /// kinase activity /// transferase activity
8058295	0.802767	1.74444	8.85294	4.7719	0.000124177	0.00465621	1.06209	ALS2	amyotrophic lateral sclerosis 2 (juvenile)	behavioral fear response /// in utero embryonic development /// ruffle /// receptor recycling /// guanyl-nucleotide exchange factor activity /// Ran guanyl-nucleotide exchange factor activity /// protein binding /// intracellular /// cytoplasm /// early endosome /// microsome /// centrosome /// cytosol /// response to oxidative stress /// endosome organization /// endosome organization /// axonog…
7956613	0.800845	1.74212	10.768	5.72	1.48305e-05	0.000977841	3.14975	TSPAN31	tetraspanin 31	membrane fraction /// integral to plasma membrane /// positive regulation of cell proliferation /// membrane
8082965	0.798133	1.73885	7.71849	5.15178	5.24555e-05	0.00247395	1.9079	MRAS	muscle RAS oncogene homolog	nucleotide binding /// GTPase activity /// GTP binding /// intracellular /// plasma membrane /// signal transduction /// Ras protein signal transduction /// multicellular organismal development /// muscle organ development /// actin cytoskeleton organization /// GTP-dependent protein binding /// GTPase activity /// plasma membrane
7948630	0.798122	1.73884	10.1253	6.85389	1.33784e-06	0.00017677	5.51272	FADS3	fatty acid desaturase 3	molecular_function /// membrane fraction /// endoplasmic reticulum /// endoplasmic reticulum membrane /// unsaturated fatty acid biosynthetic process /// transport /// membrane /// integral to membrane /// oxidoreductase activity /// oxidoreductase activity, acting on paired donors, with oxidation of a pair of donors resulting in the reduction of molecular oxygen to two molecules of water /// hem…
8162086	0.797536	1.73813	8.31295	5.77174	1.32422e-05	0.000898834	3.26114	AGTPBP1	ATP/GTP binding protein 1	metallocarboxypeptidase activity /// binding /// nucleus /// cytoplasm /// proteolysis /// peptidase activity /// metallopeptidase activity /// zinc ion binding /// metal ion binding /// cerebellar Purkinje cell differentiation /// neurotransmitter metabolic process /// neuromuscular process
7949719	0.797413	1.73798	7.75284	8.36606	7.0536e-08	1.93911e-05	8.38279	PC	pyruvate carboxylase	nucleotide binding /// pyruvate carboxylase activity /// ATP binding /// soluble fraction /// cytoplasm /// mitochondrion /// mitochondrial inner membrane /// mitochondrial matrix /// gluconeogenesis /// oxaloacetate metabolic process /// metabolic process /// lipid biosynthetic process /// biotin binding /// ligase activity /// carboxylic acid binding /// metal ion binding /// pyruvate carboxyla…
8068361	0.796793	1.73723	11.3183	5.79236	1.26587e-05	0.000879093	3.30545	SLC5A3	solute carrier family 5 (sodium/myo-inositol cotransporter), member 3	transporter activity /// myo-inositol:sodium symporter activity /// plasma membrane /// integral to plasma membrane /// inositol metabolic process /// transport /// ion transport /// sodium ion transport /// peripheral nervous system development /// symporter activity /// myo-inositol transport /// integral to membrane /// regulation of respiratory gaseous exchange /// transmembrane transport ///…
7951807	0.796713	1.73714	9.45084	6.45019	3.09113e-06	0.000328808	4.69103	CADM1 /// LOC100132764	cell adhesion molecule 1 /// hypothetical LOC100132764	liver development /// T cell mediated cytotoxicity /// receptor binding /// receptor binding /// protein binding /// plasma membrane /// plasma membrane /// cell-cell junction /// apoptosis /// immune response /// cell adhesion /// homophilic cell adhesion /// heterophilic cell-cell adhesion /// multicellular organismal development /// spermatogenesis /// synapse assembly /// synaptic vesicle ///…
7965964	0.796574	1.73697	8.81357	4.52855	0.000216854	0.00703426	0.515997	SLC41A2	solute carrier family 41, member 2	plasma membrane /// cation transport /// cation transmembrane transporter activity /// integral to membrane /// magnesium ion binding
7962151	0.794926	1.73499	9.52809	5.43579	2.77789e-05	0.00154416	2.53266	DENND5B	DENN/MADD domain containing 5B	membrane /// integral to membrane
7919971	0.793094	1.73279	9.38615	5.50191	2.3986e-05	0.00138897	2.677	RFX5	regulatory factor X, 5 (influences HLA class II expression)	negative regulation of transcription from RNA polymerase II promoter /// DNA binding /// transcription factor activity /// protein binding /// nucleus /// regulation of transcription, DNA-dependent /// nucleus
8174201	0.792432	1.73199	10.3076	7.3141	5.28868e-07	9.07718e-05	6.42124	BEX1	brain expressed, X-linked 1	nucleus /// cytoplasm /// multicellular organismal development /// nervous system development /// cell differentiation
7917516	0.792323	1.73186	10.9224	4.78068	0.000121713	0.00458965	1.08174	GBP3 /// GBP1	guanylate binding protein 3 /// guanylate binding protein 1, interferon-inducible, 67kDa	nucleotide binding /// GTPase activity /// GTP binding /// plasma membrane /// membrane /// integral to membrane /// immune response /// GTP binding
8014376	0.792288	1.73182	8.83772	6.42685	3.24662e-06	0.000335723	4.64283	LOC100134348 /// TBC1D3P2 /// TBC1D3F /// TBC1D3B /// TBC1D3C /// TBC1D3G /// TBC1D3 /// TBC1D3H	similar to TBC1 domain family member 3 (Rab GTPase-activating protein PRC17) (Prostate cancer gene 17 protein) (TRE17 alpha protein) /// TBC1 domain family, member 3 pseudogene 2 /// TBC1 domain family, member 3F /// TBC1 domain family, member 3B /// TBC1 domain family, member 3C /// TBC1 domain family, member 3G /// TBC1 domain family, member 3 /// TBC1 domain family, member 3H	GTPase activator activity /// Rab GTPase activator activity /// intracellular /// regulation of Rab GTPase activity
8019655	0.79185	1.73129	8.89402	6.27035	4.52004e-06	0.000426356	4.31779	TBC1D3F /// TBC1D3C /// TBC1D3G /// TBC1D3B /// TBC1D3 /// TBC1D3H	TBC1 domain family, member 3F /// TBC1 domain family, member 3C /// TBC1 domain family, member 3G /// TBC1 domain family, member 3B /// TBC1 domain family, member 3 /// TBC1 domain family, member 3H	GTPase activator activity /// Rab GTPase activator activity /// intracellular /// regulation of Rab GTPase activity
8118622	0.791654	1.73106	8.09025	5.78406	1.28905e-05	0.00088316	3.28761	HSD17B8	hydroxysteroid (17-beta) dehydrogenase 8	estradiol 17-beta-dehydrogenase activity /// estradiol 17-beta-dehydrogenase activity /// binding /// cellular_component /// mitochondrion /// mitochondrial matrix /// fatty acid biosynthetic process /// estrogen biosynthetic process /// estrogen biosynthetic process /// oxidoreductase activity /// testosterone 17-beta-dehydrogenase activity /// oxidation reduction /// retinoid-X receptor activit…
8178234	0.791654	1.73106	8.09025	5.78406	1.28905e-05	0.00088316	3.28761	HSD17B8	hydroxysteroid (17-beta) dehydrogenase 8	estradiol 17-beta-dehydrogenase activity /// estradiol 17-beta-dehydrogenase activity /// binding /// cellular_component /// mitochondrion /// mitochondrial matrix /// fatty acid biosynthetic process /// estrogen biosynthetic process /// estrogen biosynthetic process /// oxidoreductase activity /// testosterone 17-beta-dehydrogenase activity /// oxidation reduction /// retinoid-X receptor activit…
8179534	0.791654	1.73106	8.09025	5.78406	1.28905e-05	0.00088316	3.28761	HSD17B8	hydroxysteroid (17-beta) dehydrogenase 8	estradiol 17-beta-dehydrogenase activity /// estradiol 17-beta-dehydrogenase activity /// binding /// cellular_component /// mitochondrion /// mitochondrial matrix /// fatty acid biosynthetic process /// estrogen biosynthetic process /// estrogen biosynthetic process /// oxidoreductase activity /// testosterone 17-beta-dehydrogenase activity /// oxidation reduction /// retinoid-X receptor activit…
8023466	0.790204	1.72932	9.47533	7.02022	9.53448e-07	0.000141098	5.84459	FECH /// FECH	ferrochelatase (protoporphyria) /// ferrochelatase	ferrochelatase activity /// ferrochelatase activity /// protein binding /// mitochondrion /// mitochondrial inner membrane /// mitochondrial matrix /// generation of precursor metabolites and energy /// heme biosynthetic process /// ferrous iron binding /// response to light stimulus /// membrane /// protoporphyrinogen IX metabolic process /// metal ion binding /// 2 iron, 2 sulfur cluster bindin…
7953442	0.789599	1.72859	7.76345	6.52378	2.64924e-06	0.000294039	4.84249	GPR162	G protein-coupled receptor 162	receptor activity /// G-protein coupled receptor activity /// plasma membrane /// signal transduction /// G-protein coupled receptor protein signaling pathway /// integral to membrane
8159127	0.789555	1.72854	9.80088	6.13688	6.0088e-06	0.00052058	4.03801	RXRA	retinoid X receptor, alpha	liver development /// placenta development /// DNA binding /// double-stranded DNA binding /// transcription factor activity /// ligand-regulated transcription factor activity /// steroid hormone receptor activity /// retinoic acid receptor activity /// transcription coactivator activity /// retinoid-X receptor activity /// steroid binding /// protein binding /// nucleus /// regulation of transcr…
8074399	0.789124	1.72803	8.66197	6.53936	2.5643e-06	0.00029104	4.87448	CLTCL1	clathrin, heavy chain-like 1	signal transducer activity /// structural molecule activity /// protein binding /// intracellular protein transport /// receptor-mediated endocytosis /// anatomical structure morphogenesis /// membrane /// vesicle-mediated transport /// clathrin coat of trans-Golgi network vesicle /// clathrin coat of coated pit /// cytoplasmic vesicle membrane /// cytoplasmic vesicle
8001564	0.788141	1.72685	7.71348	8.03131	1.31797e-07	3.06884e-05	7.77596	DOK4	docking protein 4	MAPKKK cascade /// transmembrane receptor protein tyrosine kinase signaling protein activity /// insulin receptor binding /// transmembrane receptor protein tyrosine kinase signaling pathway /// nervous system development
7896337	0.787187	1.72571	8.26716	4.41668	0.00028051	0.00837681	0.264288	---	---	---
8163328	0.78692	1.72539	7.74631	7.10757	7.99262e-07	0.000124229	6.0173	PTGR1	prostaglandin reductase 1	alcohol dehydrogenase (NAD) activity /// binding /// cytoplasm /// leukotriene metabolic process /// zinc ion binding /// response to toxin /// oxidoreductase activity /// 2-alkenal reductase activity /// 15-oxoprostaglandin 13-oxidase activity /// oxidation reduction
8027398	0.784487	1.72248	8.40642	6.12482	6.16596e-06	0.000531886	4.01263	PLEKHF1	pleckstrin homology domain containing, family F (with FYVE domain) member 1	nucleus /// cytoplasm /// lysosome /// apoptosis /// induction of apoptosis /// zinc ion binding /// metal ion binding /// perinuclear region of cytoplasm
7939723	0.782538	1.72015	8.40088	5.94172	9.14788e-06	0.000695427	3.62484	C11orf49	chromosome 11 open reading frame 49	---
7905067	0.780004	1.71714	9.60555	5.28875	3.85661e-05	0.00196953	2.21014	HIST2H4A /// HIST2H4B	histone cluster 2, H4a /// histone cluster 2, H4b	nucleosome /// DNA binding /// protein binding /// nucleus /// nucleoplasm /// chromosome /// chromatin organization /// nucleosome assembly /// negative regulation of megakaryocyte differentiation /// phosphoinositide-mediated signaling
7919627	0.780004	1.71714	9.60555	5.28875	3.85661e-05	0.00196953	2.21014	HIST2H4A /// HIST2H4B	histone cluster 2, H4a /// histone cluster 2, H4b	nucleosome /// DNA binding /// protein binding /// nucleus /// nucleoplasm /// chromosome /// chromatin organization /// nucleosome assembly /// negative regulation of megakaryocyte differentiation /// phosphoinositide-mediated signaling
8020179	0.779596	1.71665	9.45417	8.00652	1.38121e-07	3.19376e-05	7.7304	CHMP1B	chromatin modifying protein 1B	protein binding /// cytoplasm /// endosome /// cytosol /// cell cycle /// protein transport /// membrane /// protein domain specific binding /// late endosome membrane /// cell division
8030931	0.778969	1.7159	7.24232	4.37164	0.000311178	0.00903338	0.162905	ZNF528	zinc finger protein 528	DNA binding /// intracellular /// nucleus /// regulation of transcription, DNA-dependent /// zinc ion binding /// metal ion binding
7930454	0.778636	1.71551	8.88044	4.51428	0.000224085	0.00721022	0.483903	PDCD4	programmed cell death 4 (neoplastic transformation inhibitor)	RNA binding /// protein binding /// nucleus /// nucleus /// cytoplasm /// cytosol /// apoptosis /// cell aging /// negative regulation of transcription /// negative regulation of transcription /// negative regulation of JUN kinase activity /// negative regulation of cell cycle
7986520	0.778363	1.71518	9.25739	4.42152	0.000277399	0.00833625	0.275188	C15orf51 /// LOC100289668 /// LOC100293963 /// LOC100293999 /// LOC441734	dynamin 1 pseudogene /// similar to dynamin 1 /// similar to dynamin 1 /// similar to dynamin 1 /// similar to hypothetical protein DKFZp434I1020	---
8014397	0.777775	1.71448	8.53204	6.15602	5.76752e-06	0.000506765	4.07829	LOC100134348 /// TBC1D3P2 /// TBC1D3F /// TBC1D3B /// TBC1D3C /// TBC1D3G /// TBC1D3 /// TBC1D3H	similar to TBC1 domain family member 3 (Rab GTPase-activating protein PRC17) (Prostate cancer gene 17 protein) (TRE17 alpha protein) /// TBC1 domain family, member 3 pseudogene 2 /// TBC1 domain family, member 3F /// TBC1 domain family, member 3B /// TBC1 domain family, member 3C /// TBC1 domain family, member 3G /// TBC1 domain family, member 3 /// TBC1 domain family, member 3H	GTPase activator activity /// Rab GTPase activator activity /// intracellular /// regulation of Rab GTPase activity
8111220	0.77755	1.71422	6.42774	4.63554	0.000169639	0.00589611	0.756381	CDH18	cadherin 18, type 2	calcium ion binding /// protein binding /// plasma membrane /// cell adhesion /// homophilic cell adhesion /// integral to membrane /// plasma membrane
8049670	0.776925	1.71348	9.64101	9.25936	1.42719e-08	6.01535e-06	9.92449	GPC1	glypican 1	extracellular region /// proteinaceous extracellular matrix /// extracellular space /// plasma membrane /// integral to plasma membrane /// anchored to membrane /// heparan sulfate proteoglycan binding /// extracellular space /// plasma membrane
8041636	0.776467	1.71293	5.27921	4.50954	0.000226538	0.00723946	0.473251	---	---	---
8098441	0.775798	1.71214	9.92443	5.15875	5.16385e-05	0.00244581	1.92332	ODZ3	odz, odd Oz/ten-m homolog 3 (Drosophila)	signal transduction /// membrane /// integral to membrane
7971590	0.775794	1.71213	6.44725	4.48054	0.000242161	0.0076299	0.408016	CAB39L	calcium binding protein 39-like	protein binding /// regulation of fatty acid oxidation
8013771	0.775091	1.7113	9.43168	8.7712	3.37502e-08	1.14671e-05	9.09582	TLCD1	TLC domain containing 1	membrane /// integral to membrane
8141477	0.774897	1.71107	7.64478	6.48488	2.87402e-06	0.000312733	4.76254	GATS	GATS, stromal antigen 3 opposite strand	---
7913824	0.772225	1.7079	8.75176	4.62259	0.000174749	0.00601096	0.727318	C1orf63	chromosome 1 open reading frame 63	---
8015049	0.771066	1.70653	5.43495	6.06389	7.02775e-06	0.000580653	3.88404	KRT222	keratin 222	structural molecule activity /// intermediate filament
8117435	0.770725	1.70613	8.37165	5.77039	1.32813e-05	0.000898834	3.25824	BTN3A2	butyrophilin, subfamily 3, member A2	biological_process /// membrane /// integral to membrane
7918379	0.77039	1.70573	7.2946	4.74058	0.000133387	0.00492938	0.991954	GSTM3	glutathione S-transferase mu 3 (brain)	glutathione transferase activity /// protein binding /// soluble fraction /// cytoplasm /// establishment of blood-nerve barrier /// metabolic process /// transferase activity /// identical protein binding /// response to estrogen stimulus /// glutathione transferase activity
8147313	0.769491	1.70467	7.81852	5.00193	7.35863e-05	0.0031987	1.57547	TMEM67	transmembrane protein 67	protein binding /// cytoplasm /// endoplasmic reticulum /// endoplasmic reticulum membrane /// centrosome /// cytoskeleton /// plasma membrane /// cilium /// microtubule basal body /// negative regulation of centrosome duplication /// integral to membrane /// ER-associated protein catabolic process /// cytoplasmic vesicle membrane /// cilium assembly /// unfolded protein binding /// cilium membra…
7941639	0.768782	1.70383	8.18016	6.10869	6.38295e-06	0.000540797	3.97864	DPP3 /// BBS1	dipeptidyl-peptidase 3 /// Bardet-Biedl syndrome 1	retina homeostasis /// protein binding /// cytoplasm /// plasma membrane /// cilium /// BBSome /// sensory cilium assembly /// cilium assembly /// photoreceptor cell maintenance /// response to stimulus /// cilium membrane /// aminopeptidase activity /// proteolysis /// peptidase activity /// metallopeptidase activity /// dipeptidyl-peptidase activity /// metal ion binding /// proteolysis /// dip…
7954029	0.767915	1.70281	9.7316	5.79277	1.26474e-05	0.000879093	3.30633	CDKN1B	cyclin-dependent kinase inhibitor 1B (p27, Kip1)	regulation of cyclin-dependent protein kinase activity /// G1/S transition of mitotic cell cycle /// protein kinase inhibitor activity /// cyclin-dependent protein kinase inhibitor activity /// transforming growth factor beta receptor, cytoplasmic mediator activity /// protein binding /// nucleus /// cytoplasm /// cytosol /// induction of apoptosis /// cell cycle /// cell cycle arrest /// negativ…
7905428	0.767131	1.70188	8.74097	4.79685	0.000117303	0.00444855	1.11793	TUFT1	tuftelin 1	protein binding /// extracellular region /// cytoplasm /// bone mineralization /// structural constituent of tooth enamel /// odontogenesis
8019778	0.766362	1.70097	9.70038	4.89047	9.4774e-05	0.00381583	1.32712	PCYT2	phosphate cytidylyltransferase 2, ethanolamine	ethanolamine-phosphate cytidylyltransferase activity /// cellular_component /// phospholipid biosynthetic process /// biosynthetic process /// transferase activity /// nucleotidyltransferase activity
8150714	0.764457	1.69873	9.64466	5.02708	6.95131e-05	0.00305692	1.63138	PCMTD1	protein-L-isoaspartate (D-aspartate) O-methyltransferase domain containing 1	protein-L-isoaspartate (D-aspartate) O-methyltransferase activity /// cytoplasm /// protein modification process
8077612	0.764266	1.69851	7.52779	4.69545	0.00014789	0.00533509	0.890795	BRPF1 /// TTLL3	bromodomain and PHD finger containing, 1 /// tubulin tyrosine ligase-like family, member 3	DNA binding /// protein binding /// intracellular /// nucleus /// cytoplasm /// zinc ion binding /// transcription activator activity /// chromatin modification /// histone H3 acetylation /// positive regulation of transcription /// metal ion binding /// MOZ/MORF histone acetyltransferase complex /// tubulin-tyrosine ligase activity /// microtubule /// cilium /// protein modification process /// …
8047738	0.763267	1.69733	8.97935	5.03966	6.75623e-05	0.00298755	1.65933	NRP2	neuropilin 2	neural crest cell migration /// receptor activity /// vascular endothelial growth factor receptor activity /// protein binding /// membrane fraction /// plasma membrane /// cell adhesion /// multicellular organismal development /// nervous system development /// axon guidance /// heart development /// integral to membrane /// semaphorin receptor activity /// cell differentiation /// axon /// nega…
8112107	0.763166	1.69721	7.70084	6.58869	2.31353e-06	0.00027065	4.97549	SKIV2L2 /// PPAP2A	superkiller viralicidic activity 2-like 2 (S. cerevisiae) /// phosphatidic acid phosphatase type 2A	membrane fraction /// plasma membrane /// integral to plasma membrane /// lipid metabolic process /// activation of protein kinase C activity by G-protein coupled receptor protein signaling pathway /// phosphatidate phosphatase activity /// phosphatidate phosphatase activity /// phosphatidate phosphatase activity /// negative regulation of cell proliferation /// germ cell migration /// hydrolase …
8129134	0.762274	1.69616	6.00344	5.65734	1.70179e-05	0.00107523	3.01447	ROS1	c-ros oncogene 1 , receptor tyrosine kinase	nucleotide binding /// protein tyrosine kinase activity /// transmembrane receptor protein tyrosine kinase activity /// receptor activity /// protein binding /// ATP binding /// membrane fraction /// sodium:potassium-exchanging ATPase complex /// protein amino acid phosphorylation /// signal transduction /// transmembrane receptor protein tyrosine kinase signaling pathway /// membrane /// integra…
7918768	0.761878	1.6957	5.17513	5.91377	9.71925e-06	0.00072724	3.56527	DENND2C	DENN/MADD domain containing 2C	---
8117685	0.760351	1.6939	7.24529	7.99987	1.39872e-07	3.21195e-05	7.71814	ZKSCAN3	zinc finger with KRAB and SCAN domains 3	transcription factor activity /// protein binding /// intracellular /// nucleus /// regulation of transcription, DNA-dependent /// zinc ion binding /// metal ion binding
7956038	0.759507	1.69291	8.23349	6.08598	6.7019e-06	0.000562099	3.93071	LOC440104 /// MMP19	hypothetical LOC440104 /// matrix metallopeptidase 19	angiogenesis /// metalloendopeptidase activity /// calcium ion binding /// extracellular region /// proteinaceous extracellular matrix /// proteolysis /// multicellular organismal development /// metabolic process /// peptidase activity /// zinc ion binding /// cell differentiation /// collagen catabolic process
7938012	0.759089	1.69242	7.26429	5.0219	7.03332e-05	0.00308143	1.61986	TRIM6 /// TRIM6-TRIM34 /// TRIM34 /// TRIM78P	tripartite motif-containing 6 /// TRIM6-TRIM34 readthrough /// tripartite motif-containing 34 /// tripartite motif-containing 78, pseudogene	molecular_function /// protein binding /// intracellular /// cytoplasm /// zinc ion binding /// metal ion binding /// protein trimerization
8047403	0.759006	1.69232	6.69529	6.29033	4.33225e-06	0.000414514	4.35948	CASP10	caspase 10, apoptosis-related cysteine peptidase	cysteine-type endopeptidase activity /// protein binding /// proteolysis /// induction of apoptosis /// peptidase activity /// induction of apoptosis by extracellular signals /// identical protein binding /// regulation of apoptosis /// positive regulation of I-kappaB kinase/NF-kappaB cascade /// cysteine-type endopeptidase activity
8020110	0.756479	1.68936	12.2064	4.94122	8.44506e-05	0.00352375	1.44029	RAB31	RAB31, member RAS oncogene family	nucleotide binding /// GTPase activity /// GTP binding /// plasma membrane /// small GTPase mediated signal transduction /// protein transport
7992518	0.756445	1.68932	9.06083	5.68971	1.58492e-05	0.00101682	3.08443	RAB26	RAB26, member RAS oncogene family	nucleotide binding /// protein binding /// GTP binding /// GTP binding /// cellular_component /// plasma membrane /// small GTPase mediated signal transduction /// biological_process /// protein transport /// regulation of exocytosis /// intrinsic to plasma membrane /// exocrine system development
7909610	0.755356	1.68805	7.424	4.40374	0.000288991	0.00856861	0.235176	ATF3	activating transcription factor 3	transcription factor activity /// transcription corepressor activity /// protein binding /// nucleus /// nucleolus /// gluconeogenesis /// regulation of transcription, DNA-dependent /// positive regulation of cell proliferation /// identical protein binding /// sequence-specific DNA binding /// protein dimerization activity /// transcription factor activity /// nucleus
7899851	0.75399	1.68645	7.80515	6.53672	2.57852e-06	0.00029104	4.86905	ADC	arginine decarboxylase	molecular_function /// cellular_component /// cytosol /// polyamine biosynthetic process /// spermatogenesis /// arginine decarboxylase activity /// lyase activity /// protein binding /// mitochondrion /// ornithine metabolic process /// arginine decarboxylase activity /// ornithine decarboxylase activator activity
8028930	0.753455	1.68583	8.43296	7.92404	1.6153e-07	3.58565e-05	7.57811	RAB4B /// MIA	RAB4B, member RAS oncogene family /// melanoma inhibitory activity	protein binding /// extracellular region /// extracellular space /// cell-matrix adhesion /// growth factor activity /// cell proliferation /// extracellular matrix organization /// nucleotide binding /// GTPase activity /// GTP binding /// intracellular /// plasma membrane /// small GTPase mediated signal transduction /// protein transport /// vesicle-mediated transport
7984124	0.749089	1.68073	7.89324	4.99696	7.44197e-05	0.0032265	1.56441	APH1B	anterior pharynx defective 1 homolog B (C. elegans)	protein binding /// plasma membrane /// apoptosis /// Notch signaling pathway /// peptidase activity /// induction of apoptosis by extracellular signals /// integral to membrane /// protein processing /// transport vesicle /// membrane protein intracellular domain proteolysis /// positive regulation of catalytic activity /// membrane
8012247	0.748063	1.67954	8.96668	4.82232	0.000110684	0.00424581	1.17489	SAT2	spermidine/spermine N1-acetyltransferase family member 2	diamine N-acetyltransferase activity /// cytoplasm /// metabolic process /// acyltransferase activity /// transferase activity
8123524	0.747146	1.67847	10.1121	4.98267	7.68699e-05	0.00330089	1.53261	EXOC2	exocyst complex component 2	exocyst /// protein binding /// exocytosis /// protein transport /// Ral GTPase binding
7982597	0.746694	1.67794	13.0913	7.07975	8.45358e-07	0.000128529	5.96241	THBS1	thrombospondin 1	activation of MAPK activity /// response to hypoxia /// phosphatidylserine binding /// negative regulation of endothelial cell proliferation /// negative regulation of endothelial cell proliferation /// glycoprotein binding /// negative regulation of cell-matrix adhesion /// fibronectin binding /// sprouting angiogenesis /// chronic inflammatory response /// negative regulation of antigen process…
8139840	0.745931	1.67706	6.42468	4.78538	0.000120414	0.00455099	1.09226	ERV3	endogenous retroviral sequence 3 (includes zinc finger protein H-plk/HPF9)	molecular_function /// structural molecule activity /// cellular_component /// biological_process /// virion /// viral capsid /// viral envelope
7996198	0.742423	1.67298	6.72733	4.57611	0.000194416	0.00648645	0.622893	CCDC113	coiled-coil domain containing 113	protein complex
7984353	0.740697	1.67098	8.22812	7.30268	5.41e-07	9.144e-05	6.39907	SMAD6	SMAD family member 6	transcription factor activity /// protein binding /// intracellular /// nucleus /// transcription factor complex /// cytoplasm /// cytosol /// regulation of transcription, DNA-dependent /// immune response /// zygotic specification of dorsal/ventral axis /// negative regulation of SMAD protein complex assembly /// BMP signaling pathway /// negative regulation of transforming growth factor beta re…
8010454	0.740068	1.67026	10.1401	6.79096	1.52221e-06	0.000196454	5.38614	RNF213 /// LOC100294362	ring finger protein 213 /// hypothetical LOC100294362	nucleotide binding /// protein binding /// zinc ion binding /// nucleoside-triphosphatase activity /// metal ion binding
8021685	0.739972	1.67014	5.21846	5.72366	1.47119e-05	0.000973881	3.15765	CCDC102B	coiled-coil domain containing 102B	---
8010426	0.735391	1.66485	9.7426	7.02066	9.52605e-07	0.000141098	5.84546	KIAA1618 /// RNF213	KIAA1618 /// ring finger protein 213	nucleotide binding /// protein binding /// zinc ion binding /// nucleoside-triphosphatase activity /// metal ion binding
7909954	0.734638	1.66398	7.337	4.96601	7.98292e-05	0.00339321	1.49553	DISP1	dispatched homolog 1 (Drosophila)	patched ligand maturation /// determination of left/right symmetry /// hedgehog receptor activity /// embryonic pattern specification /// dorsal/ventral pattern formation /// peptide transporter activity /// peptide transport /// membrane /// integral to membrane /// multicellular organismal development
8019280	0.732732	1.66178	9.74986	4.92426	8.77658e-05	0.00361251	1.4025	PCYT2	phosphate cytidylyltransferase 2, ethanolamine	ethanolamine-phosphate cytidylyltransferase activity /// cellular_component /// phospholipid biosynthetic process /// biosynthetic process /// transferase activity /// nucleotidyltransferase activity
8019622	0.732418	1.66142	8.93954	4.85902	0.000101804	0.00403064	1.25692	TMEM106A /// FLJ77644	transmembrane protein 106A /// hypothetical LOC728772	molecular_function /// cellular_component /// biological_process /// membrane /// integral to membrane
7987840	0.731371	1.66022	10.4391	8.24454	8.83555e-08	2.26306e-05	8.16436	VPS39	vacuolar protein sorting 39 homolog (S. cerevisiae)	small GTPase regulator activity /// protein binding /// cytoplasm /// lysosomal membrane /// endosome /// protein transport /// membrane /// HOPS complex /// late endosome membrane /// lysosome
8068353	0.725923	1.65396	10.9421	7.37979	4.64329e-07	8.27689e-05	6.54844	MRPS6 /// SLC5A3	mitochondrial ribosomal protein S6 /// solute carrier family 5 (sodium/myo-inositol cotransporter), member 3	transporter activity /// myo-inositol:sodium symporter activity /// plasma membrane /// integral to plasma membrane /// inositol metabolic process /// transport /// ion transport /// sodium ion transport /// peripheral nervous system development /// symporter activity /// myo-inositol transport /// integral to membrane /// regulation of respiratory gaseous exchange /// transmembrane transport ///…
8006531	0.724171	1.65195	10.5748	4.56766	0.000198221	0.00657388	0.60392	SLFN5	schlafen family member 5	nucleotide binding /// ATP binding /// nucleus /// cell differentiation
7980098	0.724076	1.65184	7.28265	4.5849	0.000190532	0.00637603	0.642649	C14orf45 /// ALDH6A1	chromosome 14 open reading frame 45 /// aldehyde dehydrogenase 6 family, member A1	acyl-CoA binding /// methylmalonate-semialdehyde dehydrogenase (acylating) activity /// mitochondrion /// thymine catabolic process /// valine metabolic process /// valine catabolic process /// oxidoreductase activity /// thiolester hydrolase activity /// malonate-semialdehyde dehydrogenase (acetylating) activity /// beta-alanine catabolic process /// thymine metabolic process /// brown fat cell …
8059650	0.724	1.65176	10.1086	7.13286	7.59623e-07	0.000119873	6.06708	SP110	SP110 nuclear body protein	DNA binding /// hematopoietin/interferon-class (D200-domain) cytokine receptor signal transducer activity /// protein binding /// nucleus /// zinc ion binding /// interspecies interaction between organisms /// regulation of transcription /// metal ion binding /// DNA binding /// nucleus
8094911	0.722296	1.64981	10.0424	5.04128	6.73154e-05	0.00298455	1.66292	ATP10D	ATPase, class V, type 10D	nucleotide binding /// magnesium ion binding /// phospholipid-translocating ATPase activity /// ATP binding /// ATP biosynthetic process /// cation transport /// metabolic process /// ATPase activity, coupled to transmembrane movement of ions, phosphorylative mechanism /// phospholipid transport /// membrane /// integral to membrane /// hydrolase activity /// hydrolase activity, acting on acid an…
7897441	0.722193	1.64969	7.82811	5.99263	8.19419e-06	0.000651163	3.73308	H6PD	hexose-6-phosphate dehydrogenase (glucose 1-dehydrogenase)	glucose-6-phosphate dehydrogenase activity /// binding /// endoplasmic reticulum /// endoplasmic reticulum lumen /// microsome /// carbohydrate metabolic process /// glucose metabolic process /// pentose-phosphate shunt /// oxidoreductase activity /// hydrolase activity /// 6-phosphogluconolactonase activity /// glucose 1-dehydrogenase activity /// oxidation reduction /// glucose-6-phosphate dehy…
8011480	0.721973	1.64944	8.45201	5.19616	4.7471e-05	0.00230079	2.006	CAMKK1	calcium/calmodulin-dependent protein kinase kinase 1, alpha	nucleotide binding /// calmodulin-dependent protein kinase activity /// calmodulin binding /// ATP binding /// nucleus /// cytoplasm /// cytosol /// protein amino acid phosphorylation /// transferase activity /// calmodulin-dependent protein kinase activity
8155121	0.721689	1.64911	9.73123	4.7263	0.000137813	0.00504815	0.959953	NPR2	natriuretic peptide receptor B/guanylate cyclase B (atrionatriuretic peptide receptor B)	nucleotide binding /// guanylate cyclase activity /// protein tyrosine kinase activity /// receptor activity /// transmembrane receptor activity /// ATP binding /// GTP binding /// membrane fraction /// plasma membrane /// cGMP biosynthetic process /// protein amino acid phosphorylation /// signal transduction /// cell surface receptor linked signaling pathway /// receptor guanylyl cyclase signal…
8116610	0.721689	1.64911	9.56484	7.27103	5.76156e-07	9.59213e-05	6.33752	NQO2 /// LOC401233	NAD(P)H dehydrogenase, quinone 2 /// similar to HIV TAT specific factor 1; cofactor required for Tat activation of HIV-1 transcription	dihydronicotinamide riboside quinone reductase activity /// cytoplasm /// NADPH dehydrogenase (quinone) activity /// electron carrier activity /// metal ion binding /// coenzyme binding /// oxidation reduction /// zinc ion binding
8171161	0.719703	1.64684	8.50971	4.81362	0.000112901	0.00430615	1.15544	ARSE	arylsulfatase E (chondrodysplasia punctata 1)	skeletal system development /// arylsulfatase activity /// Golgi apparatus /// Golgi stack /// metabolic process /// hydrolase activity /// metal ion binding /// calcium ion binding
8007483	0.715881	1.64249	8.90918	4.98281	7.68459e-05	0.00330089	1.53292	TMEM106A /// FLJ77644	transmembrane protein 106A /// hypothetical LOC728772	molecular_function /// cellular_component /// biological_process /// membrane /// integral to membrane
8094638	0.715834	1.64243	8.04521	4.41019	0.000284733	0.00846495	0.249685	WDR19	WD repeat domain 19	binding /// protein binding /// intracellular protein transport /// vesicle-mediated transport
8180336	0.711978	1.63805	9.2874	5.51672	2.32117e-05	0.00135119	2.70926	---	---	---
8008933	0.710953	1.63688	8.39506	4.62537	0.000173639	0.00598352	0.733556	BCAS3	breast carcinoma amplified sequence 3	nucleus
8141768	0.709963	1.63576	8.22625	7.4633	3.93861e-07	7.32647e-05	6.70922	POLR2J4 /// LOC100132214 /// RASA4 /// RASA4P /// RASA4B	polymerase (RNA) II (DNA directed) polypeptide J4, pseudogene /// similar to calcium-promoted Ras inactivator /// RAS p21 protein activator 4 /// RAS p21 protein activator 4 pseudogene /// RAS p21 protein activator 4B	GTPase activator activity /// intracellular /// cytoplasm /// cytosol /// plasma membrane /// metal ion binding /// regulation of small GTPase mediated signal transduction /// intracellular signaling cascade /// zinc ion binding
8007493	0.707679	1.63317	7.96728	4.94783	8.31911e-05	0.00347992	1.45504	ARL4D	ADP-ribosylation factor-like 4D	nucleotide binding /// GTPase activity /// GTP binding /// intracellular /// nucleus /// nucleolus /// small GTPase mediated signal transduction /// protein secretion
8171791	0.706991	1.6324	5.29716	4.46537	0.000250765	0.00780347	0.373874	SMPX	small muscle protein, X-linked	nucleus /// cytoplasm /// striated muscle contraction
8120932	0.7062	1.6315	6.22954	5.87809	1.05023e-05	0.000763523	3.48909	PRSS35	protease, serine, 35	catalytic activity /// serine-type endopeptidase activity /// extracellular region /// proteolysis
8037005	0.705057	1.63021	10.7371	7.48022	3.80987e-07	7.1286e-05	6.74167	TGFB1	transforming growth factor, beta 1	response to hypoxia /// morphogenesis of a branching structure /// negative regulation of protein amino acid phosphorylation /// positive regulation of protein amino acid phosphorylation /// hemopoietic progenitor cell differentiation /// connective tissue replacement during inflammatory response /// tolerance induction to self antigen /// type II transforming growth factor beta receptor binding …
8084541	0.703501	1.62845	9.15446	6.6137	2.1962e-06	0.000261168	5.02656	VPS8	vacuolar protein sorting 8 homolog (S. cerevisiae)	protein binding /// zinc ion binding /// metal ion binding
7979904	0.70316	1.62807	7.36727	4.31342	0.000355887	0.00999155	0.0318016	ADAM21P /// ADAM21 /// ADAM21P1	ADAM metallopeptidase domain 21 pseudogene /// ADAM metallopeptidase domain 21 /// ADAM metallopeptidase domain 21 pseudogene 1	metalloendopeptidase activity /// proteolysis /// single fertilization /// peptidase activity /// metallopeptidase activity /// zinc ion binding /// membrane /// integral to membrane /// metal ion binding
7913682	0.702563	1.62739	7.61417	6.11781	6.25932e-06	0.000533035	3.99786	HMGCL /// HMGCL	3-hydroxymethyl-3-methylglutaryl-Coenzyme A lyase /// 3-hydroxymethyl-3-methylglutaryl-CoA lyase	acyl-CoA binding /// hydroxymethylglutaryl-CoA lyase activity /// mitochondrion /// mitochondrial inner membrane /// mitochondrial matrix /// acyl-CoA metabolic process /// metabolic process /// lyase activity /// carboxylic acid binding /// metal ion binding /// ketone body biosynthetic process /// hydroxymethylglutaryl-CoA lyase activity /// mitochondrial matrix /// metal ion binding
8103415	0.701715	1.62644	5.50865	4.90092	9.25473e-05	0.00375341	1.35045	C4orf18 /// FAM198B	chromosome 4 open reading frame 18 /// family with sequence similarity 198, member B	Golgi membrane /// Golgi apparatus /// membrane /// integral to membrane /// Golgi apparatus
8074980	0.700088	1.6246	8.82493	6.41687	3.31556e-06	0.000340735	4.6222	GSTT1	glutathione S-transferase theta 1	glutathione transferase activity /// cytoplasm /// transferase activity /// glutathione transferase activity
7925589	0.69968	1.62414	8.60023	5.98942	8.25131e-06	0.000651163	3.72625	SMYD3	SET and MYND domain containing 3	protein binding /// nucleus /// cytoplasm /// methyltransferase activity /// zinc ion binding /// chromatin modification /// transferase activity /// histone-lysine N-methyltransferase activity /// metal ion binding
8078461	0.699516	1.62396	8.70096	5.29979	3.76249e-05	0.00193632	2.23443	FBXL2	F-box and leucine-rich repeat protein 2	ubiquitin-protein ligase activity /// protein binding /// cytoplasm /// protein modification process /// proteolysis /// protein binding /// modification-dependent protein catabolic process
7939298	0.696792	1.6209	9.89581	4.96562	7.98998e-05	0.00339321	1.49466	CAT	catalase	response to reactive oxygen species /// aminoacylase activity /// catalase activity /// mitochondrion /// mitochondrial intermembrane space /// lysosome /// peroxisome /// peroxisomal membrane /// endoplasmic reticulum /// Golgi apparatus /// cytosol /// plasma membrane /// triglyceride metabolic process /// cholesterol metabolic process /// aerobic respiration /// UV protection /// positive regu…
8041676	0.695639	1.6196	6.82167	6.28253	4.40457e-06	0.000418022	4.34321	DYNC2LI1	dynein, cytoplasmic 2, light intermediate chain 1	motor activity /// cytoplasm /// cytoskeleton /// microtubule /// cilium /// multicellular organismal development /// cell projection organization /// dynein complex /// cilium axoneme /// determination of left/right symmetry /// cilium assembly
7912646	0.693774	1.61751	8.10146	4.69007	0.00014972	0.00538944	0.878743	CASP9	caspase 9, apoptosis-related cysteine peptidase	cysteine-type endopeptidase activity /// protein binding /// intracellular /// cytosol /// proteolysis /// apoptosis /// enzyme activator activity /// peptidase activity /// activation of caspase activity by cytochrome c /// regulation of apoptosis /// cysteine-type endopeptidase activity
8057418	0.692241	1.61579	8.28872	6.09526	6.56965e-06	0.000553797	3.9503	ZNF385B	zinc finger protein 385B	nucleic acid binding /// intracellular /// nucleus /// zinc ion binding /// metal ion binding
8133938	0.691226	1.61465	8.26625	4.59426	0.000186483	0.00629771	0.663681	CROT	carnitine O-octanoyltransferase	peroxisome /// peroxisomal matrix /// generation of precursor metabolites and energy /// lipid metabolic process /// fatty acid metabolic process /// transport /// acyltransferase activity /// carnitine O-octanoyltransferase activity /// transferase activity /// peroxisome /// fatty acid metabolic process /// carnitine O-octanoyltransferase activity /// fatty acid transport
7942520	0.688672	1.6118	6.46555	5.31914	3.6031e-05	0.0018788	2.27697	---	---	---
7971015	0.688661	1.61179	8.20498	5.81023	1.21745e-05	0.00085522	3.3438	SMAD9	SMAD family member 9	response to hypoxia /// Mullerian duct regression /// transcription factor activity /// protein binding /// intracellular /// nucleus /// nucleoplasm /// transcription factor complex /// cytoplasm /// cytosol /// regulation of transcription, DNA-dependent /// transforming growth factor beta receptor signaling pathway /// BMP signaling pathway /// BMP signaling pathway /// transforming growth fact…
8124583	0.688078	1.61114	6.35684	5.50371	2.38905e-05	0.00138586	2.68092	ZSCAN23	zinc finger and SCAN domain containing 23	transcription factor activity /// intracellular /// nucleus /// regulation of transcription, DNA-dependent /// zinc ion binding /// metal ion binding
8106986	0.684714	1.60738	11.6618	5.80079	1.24281e-05	0.000867542	3.32353	RHOBTB3	Rho-related BTB domain containing 3	nucleotide binding /// protein binding /// ATP binding /// Golgi apparatus /// transport /// hydrolase activity /// ATPase activity /// Rab GTPase binding /// retrograde transport, endosome to Golgi
8022872	0.684681	1.60735	7.2589	4.53519	0.000213569	0.00695814	0.530931	ZNF397OS /// ZNF397	zinc finger protein 397 opposite strand /// zinc finger protein 397	transcription factor activity /// intracellular /// nucleus /// cytoplasm /// regulation of transcription, DNA-dependent /// zinc ion binding /// metal ion binding /// nucleus /// nucleolus /// cytoplasm
7904293	0.68445	1.60709	10.155	5.96377	8.72164e-06	0.000672794	3.67175	PTGFRN	prostaglandin F2 receptor negative regulator	protein binding /// endoplasmic reticulum /// endoplasmic reticulum membrane /// Golgi apparatus /// membrane /// integral to membrane
7953518	0.683501	1.60603	8.88573	5.61085	1.88521e-05	0.00116244	2.91381	LOC171220	destrin-2 pseudogene	---
7914923	0.682175	1.60456	6.8801	6.54433	2.53784e-06	0.000290239	4.88466	OSCP1	organic solute carrier partner 1	plasma membrane /// transport /// basal plasma membrane
8061305	0.681972	1.60433	8.20896	6.16952	5.6035e-06	0.000498877	4.10664	C20orf19 /// PLK1S1	chromosome 20 open reading frame 19 /// polo-like kinase 1 substrate 1	protein binding /// cytoplasm /// centrosome /// cytoskeleton /// spindle organization /// protein kinase binding /// spindle pole body organization
7923453	0.681448	1.60375	9.82627	5.02613	6.96622e-05	0.00305692	1.62927	KDM5B	lysine (K)-specific demethylase 5B	DNA binding /// transcription factor activity /// protein binding /// intracellular /// nucleus /// zinc ion binding /// oxidoreductase activity /// transcription repressor activity /// chromatin modification /// oxidoreductase activity, acting on single donors with incorporation of molecular oxygen, incorporation of two atoms of oxygen /// regulation of transcription /// negative regulation of t…
8145685	0.681321	1.60361	5.90396	4.92614	8.73926e-05	0.00361031	1.40668	---	---	---
7942232	0.680932	1.60317	8.80166	6.02498	7.64186e-06	0.0006176	3.80169	NADSYN1	NAD synthetase 1	nucleotide binding /// NAD+ synthase (glutamine-hydrolyzing) activity /// protein binding /// ATP binding /// cytosol /// nitrogen compound metabolic process /// NAD biosynthetic process /// hydrolase activity, acting on carbon-nitrogen (but not peptide) bonds /// ligase activity /// NAD metabolic process /// NAD+ synthase (glutamine-hydrolyzing) activity
8076690	0.680805	1.60303	9.90008	8.13429	1.08568e-07	2.63867e-05	7.96437	C22orf9	chromosome 22 open reading frame 9	protein binding
7961371	0.680598	1.6028	8.42959	6.76009	1.62209e-06	0.000206147	5.32382	DUSP16	dual specificity phosphatase 16	inactivation of MAPK activity /// phosphoprotein phosphatase activity /// protein tyrosine phosphatase activity /// protein binding /// nucleus /// cytoplasm /// protein amino acid dephosphorylation /// cytoplasmic membrane-bounded vesicle /// dephosphorylation /// hydrolase activity /// MAP kinase tyrosine/serine/threonine phosphatase activity /// MAPK export from nucleus /// MAPK phosphatase ex…
8090314	0.680488	1.60268	8.87462	5.7309	1.44804e-05	0.000964967	3.17324	ALDH1L1	aldehyde dehydrogenase 1 family, member L1	acyl carrier activity /// catalytic activity /// cytoplasm /// one-carbon metabolic process /// methyltransferase activity /// biosynthetic process /// 10-formyltetrahydrofolate catabolic process /// formyltetrahydrofolate dehydrogenase activity /// oxidoreductase activity /// hydroxymethyl-, formyl- and related transferase activity /// cofactor binding /// oxidation reduction /// 10-formyltetrah…
8167815	0.680351	1.60253	8.66827	5.70627	1.52838e-05	0.000992105	3.12015	MAGED2	melanoma antigen family D, 2	---
7919815	0.678677	1.60067	6.97802	4.61808	0.000176568	0.00606729	0.717173	CTSK	cathepsin K	intramembranous ossification /// cysteine-type endopeptidase activity /// protein binding /// extracellular space /// cytoplasm /// lysosome /// proteolysis /// peptidase activity /// cysteine-type peptidase activity /// bone resorption /// cysteine-type endopeptidase activity /// proteolysis
8075322	0.676859	1.59866	8.31744	4.33058	0.000342081	0.00973528	0.0704315	TBC1D10A /// GATSL3	TBC1 domain family, member 10A /// GATS protein-like 3	Rab GTPase activator activity /// protein binding /// intracellular /// microvillus /// biological_process /// PDZ domain binding /// regulation of Rab GTPase activity
7951429	0.676467	1.59822	5.95469	4.37842	0.000306353	0.00892079	0.178171	KBTBD3	kelch repeat and BTB (POZ) domain containing 3	protein binding
8103064	0.676267	1.598	5.07326	5.07187	6.28179e-05	0.00283421	1.73083	TTC29	tetratricopeptide repeat domain 29	binding
8042066	0.675345	1.59698	7.77479	6.58806	2.31659e-06	0.00027065	4.97419	CCDC104	coiled-coil domain containing 104	nucleus /// nucleolus
8112865	0.675172	1.59679	9.17927	4.85419	0.000102931	0.00406076	1.24612	SERINC5	serine incorporator 5	endoplasmic reticulum /// endoplasmic reticulum membrane /// lipid metabolic process /// phosphatidylserine metabolic process /// phospholipid biosynthetic process /// membrane /// integral to membrane /// positive regulation of transferase activity /// Golgi apparatus /// myelination /// myelin sheath
8120860	0.673687	1.59514	8.69875	5.57367	2.04643e-05	0.00122775	2.83312	BCKDHB	branched chain keto acid dehydrogenase E1, beta polypeptide	alpha-ketoacid dehydrogenase activity /// 3-methyl-2-oxobutanoate dehydrogenase (2-methylpropanoyl-transferring) activity /// protein binding /// mitochondrion /// mitochondrial matrix /// mitochondrial alpha-ketoglutarate dehydrogenase complex /// response to nutrient /// branched chain family amino acid catabolic process /// carboxy-lyase activity /// protein complex binding /// response to glu…
7994576	0.673286	1.5947	8.30107	5.98538	8.32358e-06	0.000652083	3.71768	RUNDC2A /// RUNDC2B /// RUNDC2C	RUN domain containing 2A /// RUN domain containing 2B /// RUN domain containing 2C	---
8115099	0.673166	1.59457	7.49472	4.88875	9.51453e-05	0.00382615	1.32328	PDGFRB	platelet-derived growth factor receptor, beta polypeptide	nucleotide binding /// in utero embryonic development /// kidney development /// tissue homeostasis /// receptor activity /// platelet activating factor receptor activity /// platelet-derived growth factor receptor activity /// platelet-derived growth factor beta-receptor activity /// vascular endothelial growth factor receptor activity /// platelet-derived growth factor receptor binding /// prot…
8058552	0.669661	1.5907	11.4319	5.53038	2.25201e-05	0.00132483	2.739	IDH1	isocitrate dehydrogenase 1 (NADP+), soluble	magnesium ion binding /// isocitrate dehydrogenase (NADP+) activity /// soluble fraction /// cytoplasm /// peroxisome /// cytosol /// carbohydrate metabolic process /// glyoxylate cycle /// tricarboxylic acid cycle /// isocitrate metabolic process /// 2-oxoglutarate metabolic process /// NADPH regeneration /// glutathione metabolic process /// response to oxidative stress /// female gonad develop…
8067055	0.669617	1.59065	8.7024	4.91477	8.96801e-05	0.00367291	1.38133	ATP9A	ATPase, class II, type 9A	nucleotide binding /// magnesium ion binding /// phospholipid-translocating ATPase activity /// ATP binding /// ATP biosynthetic process /// metabolic process /// ATPase activity, coupled to transmembrane movement of ions, phosphorylative mechanism /// phospholipid transport /// membrane /// integral to membrane /// hydrolase activity /// hydrolase activity, acting on acid anhydrides, catalyzing …
7978331	0.66887	1.58983	7.64765	5.81186	1.21314e-05	0.000855098	3.34729	CBLN3	cerebellin 3 precursor	protein binding /// extracellular region /// cell junction /// synapse
7932495	0.668338	1.58924	7.33961	5.88545	1.03355e-05	0.000759631	3.50483	C10orf114	chromosome 10 open reading frame 114	---
8143702	0.665379	1.58598	6.67562	7.44968	4.04553e-07	7.48356e-05	6.68306	ZNF425	zinc finger protein 425	DNA binding /// intracellular /// nucleus /// regulation of transcription, DNA-dependent /// zinc ion binding /// metal ion binding
8158317	0.662985	1.58336	10.6192	6.70982	1.79937e-06	0.000221903	5.22209	SPTAN1	spectrin, alpha, non-erythrocytic 1 (alpha-fodrin)	actin binding /// structural constituent of cytoskeleton /// calcium ion binding /// protein binding /// calmodulin binding /// membrane fraction /// cytoplasm /// cytosol /// cytoskeleton /// cell cortex /// spectrin /// actin filament capping /// actin binding /// cytoskeleton
8045336	0.660913	1.58108	9.51182	6.67451	1.93577e-06	0.000236383	5.15042	GPR39 /// LYPD1	G protein-coupled receptor 39 /// LY6/PLAUR domain containing 1	receptor activity /// G-protein coupled receptor activity /// plasma membrane /// integral to plasma membrane /// signal transduction /// G-protein coupled receptor protein signaling pathway /// metal ion binding /// anchored to membrane /// G-protein coupled receptor activity /// G-protein coupled receptor protein signaling pathway /// zinc ion binding
8135849	0.659245	1.57926	4.91918	4.8363	0.000107211	0.00415379	1.20615	---	---	---
7993825	0.658397	1.57833	8.11894	5.78812	1.27767e-05	0.00088316	3.29633	RUNDC2A /// RUNDC2B /// RUNDC2C	RUN domain containing 2A /// RUN domain containing 2B /// RUN domain containing 2C	---
8156549	0.657151	1.57697	7.53654	6.76823	1.5951e-06	0.000204277	5.34028	C9orf3	chromosome 9 open reading frame 3	aminopeptidase activity /// binding /// cytoplasm /// proteolysis /// peptidase activity /// metallopeptidase activity /// zinc ion binding /// leukotriene biosynthetic process /// metal ion binding
8172493	0.655722	1.5754	6.83413	4.64339	0.000166616	0.00582752	0.773996	KCND1	potassium voltage-gated channel, Shal-related subfamily, member 1	voltage-gated ion channel activity /// voltage-gated potassium channel activity /// protein binding /// cellular_component /// ion transport /// potassium ion transport /// voltage-gated potassium channel complex /// membrane /// integral to membrane /// metal ion binding /// transmembrane transport /// zinc ion binding /// potassium ion binding
8028908	0.655341	1.57499	7.86466	6.48125	2.896e-06	0.000313079	4.75505	ITPKC	inositol 1,4,5-trisphosphate 3-kinase C	nucleotide binding /// calmodulin binding /// ATP binding /// nucleus /// cytoplasm /// inositol trisphosphate 3-kinase activity /// kinase activity /// transferase activity
8043244	0.655208	1.57484	7.28693	5.43816	2.76327e-05	0.00153861	2.53784	ATOH8	atonal homolog 8 (Drosophila)	DNA binding /// nucleus /// multicellular organismal development /// nervous system development /// cell differentiation /// transcription regulator activity /// regulation of transcription
8042144	0.648629	1.56768	8.48929	4.78392	0.000120816	0.00456102	1.08899	REL	v-rel reticuloendotheliosis viral oncogene homolog (avian)	cytokine production /// transcription factor activity /// protein binding /// nucleus /// positive regulation of I-kappaB kinase/NF-kappaB cascade /// positive regulation of interleukin-12 biosynthetic process /// positive regulation of transcription, DNA-dependent /// transcription factor activity /// regulation of transcription, DNA-dependent
7917482	0.64857	1.56761	10.3842	5.04336	6.69994e-05	0.00297848	1.66754	CCBL2 /// RBMXL1	cysteine conjugate-beta lyase 2 /// RNA binding motif protein, X-linked-like 1	cellular amino acid metabolic process /// biosynthetic process /// kynurenine-oxoglutarate transaminase activity /// lyase activity /// pyridoxal phosphate binding /// kynurenine-glyoxylate transaminase activity /// cysteine-S-conjugate beta-lyase activity /// kynurenine metabolic process /// kynurenine-oxoglutarate transaminase activity
8175288	0.648024	1.56702	8.5102	4.32043	0.000350182	0.00986466	0.0475782	MOSPD1	motile sperm domain containing 1	structural molecule activity /// membrane /// integral to membrane
7906954	0.647776	1.56675	6.86189	6.1573	5.75185e-06	0.000506765	4.08096	PBX1	pre-B-cell leukemia homeobox 1	urogenital system development /// branching involved in ureteric bud morphogenesis /// DNA binding /// transcription factor activity /// protein binding /// nucleus /// transcription factor complex /// nucleolus /// cytoplasm /// regulation of transcription, DNA-dependent /// steroid biosynthetic process /// sex differentiation /// positive regulation of cell proliferation /// organ morphogenesis…
8026047	0.647634	1.5666	9.491	4.85571	0.000102574	0.0040563	1.24953	JUNB	jun B proto-oncogene	chromatin /// vasculogenesis /// trophectodermal cell differentiation /// embryonic placenta development /// DNA binding /// double-stranded DNA binding /// transcription factor activity /// RNA polymerase II transcription factor activity /// transcription coactivator activity /// transcription corepressor activity /// nucleus /// nucleolus /// regulation of transcription from RNA polymerase II p…
7960654	0.643678	1.56231	9.68082	5.20978	4.60394e-05	0.00225437	2.03608	ING4	inhibitor of growth family, member 4	histone acetyltransferase complex /// transcription coactivator activity /// protein binding /// nucleus /// DNA replication /// protein amino acid acetylation /// apoptosis /// DNA damage response, signal transduction by p53 class mediator resulting in transcription of p21 class mediator /// cell cycle /// cell cycle arrest /// zinc ion binding /// negative regulation of cell proliferation /// c…
7933821	0.642161	1.56066	7.26656	5.92728	9.43865e-06	0.000711038	3.59408	RHOBTB1	Rho-related BTB domain containing 1	nucleotide binding /// protein binding /// GTP binding /// intracellular /// small GTPase mediated signal transduction
8125139	0.642093	1.56059	10.1804	6.11893	6.24432e-06	0.000533035	4.00022	NEU1	sialidase 1 (lysosomal sialidase)	exo-alpha-sialidase activity /// protein binding /// lysosome /// lysosomal membrane /// plasma membrane /// metabolic process /// cytoplasmic membrane-bounded vesicle /// hydrolase activity, acting on glycosyl bonds /// lysosomal lumen /// exo-alpha-sialidase activity /// cytoplasmic vesicle
8179851	0.642093	1.56059	10.1804	6.11893	6.24432e-06	0.000533035	4.00022	NEU1	sialidase 1 (lysosomal sialidase)	exo-alpha-sialidase activity /// protein binding /// lysosome /// lysosomal membrane /// plasma membrane /// metabolic process /// cytoplasmic membrane-bounded vesicle /// hydrolase activity, acting on glycosyl bonds /// lysosomal lumen /// exo-alpha-sialidase activity /// cytoplasmic vesicle
8093191	0.641702	1.56017	11.5157	6.42058	3.28974e-06	0.000339128	4.62988	DLG1	discs, large homolog 1 (Drosophila)	endothelial cell proliferation /// guanylate kinase activity /// phosphoprotein phosphatase activity /// protein binding /// endoplasmic reticulum /// endoplasmic reticulum membrane /// cytosol /// plasma membrane /// cell-cell junction /// actin filament organization /// establishment or maintenance of cell polarity /// protein C-terminus binding /// cytoskeletal protein binding /// postsynaptic…
8077688	0.639356	1.55763	8.29204	4.77686	0.00012278	0.00461942	1.07319	IL17RC	interleukin 17 receptor C	receptor activity /// plasma membrane /// integral to membrane
7958828	0.639124	1.55738	9.52116	5.41177	2.93037e-05	0.00161011	2.48012	TRAFD1	TRAF-type zinc finger domain containing 1	protein binding /// intracellular /// zinc ion binding /// metal ion binding
8082100	0.638962	1.55721	10.4134	4.77093	0.000124452	0.00465788	1.05992	PARP14	poly (ADP-ribose) polymerase family, member 14	NAD+ ADP-ribosyltransferase activity /// nucleus /// cytoplasm /// plasma membrane /// transferase activity, transferring glycosyl groups /// regulation of transcription /// protein binding /// cytoplasm
7975971	0.638754	1.55698	7.26179	5.1029	5.85659e-05	0.00270093	1.79966	C14orf174	chromosome 14 open reading frame 174	---
8075897	0.638722	1.55695	8.3584	4.97701	7.78625e-05	0.0033281	1.52002	C1QTNF6	C1q and tumor necrosis factor related protein 6	extracellular region
7957551	0.638569	1.55678	8.12214	5.99955	8.07264e-06	0.000644591	3.74778	SOCS2	suppressor of cytokine signaling 2	regulation of cell growth /// SH3/SH2 adaptor activity /// growth hormone receptor binding /// prolactin receptor binding /// insulin-like growth factor receptor binding /// protein binding /// cytoplasm /// anti-apoptosis /// JAK-STAT cascade /// aging /// JAK pathway signal transduction adaptor activity /// regulation of signal transduction /// negative regulation of signal transduction /// res…
8062251	0.637927	1.55609	8.12658	5.53576	2.22532e-05	0.00131144	2.75072	EPB41L1	erythrocyte membrane protein band 4.1-like 1	actin binding /// structural molecule activity /// binding /// cytoplasm /// cytosol /// cytoskeleton /// plasma membrane /// extrinsic to membrane /// cortical actin cytoskeleton organization
8091260	0.637565	1.5557	6.92853	5.10778	5.79249e-05	0.00268251	1.81047	SLC9A9	solute carrier family 9 (sodium/hydrogen exchanger), member 9	cation transport /// sodium ion transport /// regulation of pH /// antiporter activity /// solute:hydrogen antiporter activity /// sodium:hydrogen antiporter activity /// membrane /// integral to membrane /// late endosome membrane /// recycling endosome /// transmembrane transport /// sodium:hydrogen antiporter activity /// sodium ion binding
7895074	0.636766	1.55484	9.52733	4.56859	0.000197799	0.00656642	0.606007	---	---	---
8012349	0.636451	1.5545	7.89372	5.92522	9.48087e-06	0.000712606	3.58969	PER1	period homolog 1 (Drosophila)	signal transducer activity /// protein binding /// nucleus /// cytoplasm /// regulation of transcription, DNA-dependent /// signal transduction /// circadian rhythm /// entrainment of circadian clock /// negative regulation of transcription /// circadian rhythm
7900833	0.636015	1.55403	9.81105	6.43445	3.19514e-06	0.000332551	4.65853	KDM4A	lysine (K)-specific demethylase 4A	nucleic acid binding /// protein binding /// nucleus /// nucleolus /// cytoplasm /// zinc ion binding /// oxidoreductase activity /// transcription repressor activity /// chromatin modification /// histone demethylation /// oxidoreductase activity, acting on single donors with incorporation of molecular oxygen, incorporation of two atoms of oxygen /// interspecies interaction between organisms //…
8178676	0.632591	1.55035	10.6046	6.2226	5.00335e-06	0.000457683	4.21797	NEU1	sialidase 1 (lysosomal sialidase)	exo-alpha-sialidase activity /// protein binding /// lysosome /// lysosomal membrane /// plasma membrane /// metabolic process /// cytoplasmic membrane-bounded vesicle /// hydrolase activity, acting on glycosyl bonds /// lysosomal lumen /// exo-alpha-sialidase activity /// cytoplasmic vesicle
7996448	0.632251	1.54998	8.75126	7.18925	6.78371e-07	0.000110184	6.17778	NOL3 /// KIAA0895L	nucleolar protein 3 (apoptosis repressor with CARD domain) /// KIAA0895-like	RNA binding /// protein binding /// intracellular /// nucleus /// nucleolus /// cytoplasm /// cytosol /// mRNA processing /// anti-apoptosis /// RNA splicing /// identical protein binding /// regulation of apoptosis /// nucleolus /// RNA splicing
7951910	0.628251	1.54569	9.92561	5.06343	6.40267e-05	0.00287318	1.71211	BACE1	beta-site APP-cleaving enzyme 1	aspartic-type endopeptidase activity /// protein binding /// membrane fraction /// endosome /// endoplasmic reticulum /// Golgi apparatus /// trans-Golgi network /// integral to plasma membrane /// proteolysis /// membrane protein ectodomain proteolysis /// peptidase activity /// beta-aspartyl-peptidase activity /// cell surface /// membrane /// integral to membrane /// axon /// cytoplasmic vesic…
8177834	0.626601	1.54392	8.47593	6.38465	3.54852e-06	0.000355889	4.55551	C6orf134	chromosome 6 open reading frame 134	---
8140170	0.62648	1.54379	6.48487	7.1099	7.95522e-07	0.000124229	6.02189	GTF2IRD2 /// GTF2IRD2B	GTF2I repeat domain containing 2 /// GTF2I repeat domain containing 2B	DNA binding /// intracellular /// nucleus /// zinc ion binding /// regulation of transcription
7983228	0.626041	1.54332	6.85467	7.06896	8.63969e-07	0.000130762	5.94109	MAP1A	microtubule-associated protein 1A	structural molecule activity /// protein binding /// microtubule /// microtubule associated complex
7903239	0.625674	1.54293	8.77122	4.67363	0.000155463	0.00554429	0.841867	AGL /// AGL	amylo-1, 6-glucosidase, 4-alpha-glucanotransferase /// amylo-alpha-1, 6-glucosidase, 4-alpha-glucanotransferase	glycogen debranching enzyme activity /// 4-alpha-glucanotransferase activity /// amylo-alpha-1,6-glucosidase activity /// protein binding /// nucleus /// cytoplasm /// cytosol /// carbohydrate metabolic process /// glycogen biosynthetic process /// metabolic process /// inclusion body /// transferase activity, transferring glycosyl groups /// hydrolase activity, acting on glycosyl bonds /// polys…
8087236	0.625621	1.54287	9.78714	4.34918	0.000327714	0.00939871	0.11233	WDR6 /// DALRD3 /// LOC100291552	WD repeat domain 6 /// DALR anticodon binding domain containing 3 /// similar to DALR anticodon binding domain containing 3	protein binding /// soluble fraction /// cytoplasm /// cell cycle arrest /// negative regulation of cell proliferation /// protein complex /// insulin receptor substrate binding /// nucleotide binding /// arginine-tRNA ligase activity /// ATP binding /// cytoplasm /// arginyl-tRNA aminoacylation
8036908	0.6251	1.54232	8.03542	5.87876	1.04869e-05	0.000763523	3.49053	SERTAD3	SERTA domain containing 3	protein binding /// nucleus /// transcription activator activity /// negative regulation of cell growth /// positive regulation of transcription
8096130	0.624951	1.54216	7.44864	4.90932	9.07979e-05	0.00370957	1.36917	CDS1	CDP-diacylglycerol synthase (phosphatidate cytidylyltransferase) 1	diacylglycerol cholinephosphotransferase activity /// phosphatidate cytidylyltransferase activity /// endoplasmic reticulum /// endoplasmic reticulum membrane /// lipid metabolic process /// signal transduction /// visual perception /// phospholipid biosynthetic process /// membrane /// integral to membrane /// nucleotidyltransferase activity /// magnesium ion binding
8156060	0.622964	1.54004	10.2203	4.95531	8.17906e-05	0.00343861	1.4717	TLE4	transducin-like enhancer of split 4 (E(sp1) homolog, Drosophila)	molecular_function /// nucleus /// biological_process /// Wnt receptor signaling pathway /// regulation of transcription
8119926	0.620443	1.53735	9.555	5.2769	3.96033e-05	0.00201324	2.18406	TMEM63B	transmembrane protein 63B	membrane /// integral to membrane
8072279	0.618313	1.53508	9.57384	5.96263	8.74317e-06	0.000672794	3.66933	MTMR3	myotubularin related protein 3	protein serine/threonine phosphatase activity /// protein tyrosine phosphatase activity /// membrane fraction /// cytoplasm /// protein amino acid dephosphorylation /// zinc ion binding /// membrane /// hydrolase activity /// metal ion binding
7910915	0.617762	1.53449	6.98226	5.89995	1.00153e-05	0.000744372	3.53577	CHRM3	cholinergic receptor, muscarinic 3	regulation of vascular smooth muscle contraction /// phosphoinositide phospholipase C activity /// receptor activity /// G-protein coupled receptor activity /// muscarinic acetylcholine receptor activity /// plasma membrane /// integral to plasma membrane /// protein modification process /// signal transduction /// G-protein coupled receptor protein signaling pathway /// muscarinic acetylcholine …
7984631	0.616472	1.53312	6.85033	4.55026	0.000206305	0.00678788	0.564798	C15orf34	chromosome 15 open reading frame 34	---
8030539	0.615908	1.53252	8.92465	5.24669	4.23785e-05	0.00212573	2.1175	TBC1D17	TBC1 domain family, member 17	GTPase activator activity /// Rab GTPase activator activity /// intracellular /// regulation of Rab GTPase activity
8004671	0.614742	1.53128	8.29471	4.68703	0.000150765	0.00541533	0.871931	KDM6B	lysine (K)-specific demethylase 6B	negative regulation of transcription from RNA polymerase II promoter /// binding /// nucleus /// inflammatory response /// oxidoreductase activity /// chromatin modification /// histone demethylation /// oxidoreductase activity, acting on single donors with incorporation of molecular oxygen, incorporation of two atoms of oxygen /// sequence-specific DNA binding /// metal ion binding /// oxidation…
7932094	0.614561	1.53109	8.42929	4.51214	0.000225189	0.00722353	0.479093	PHYH	phytanoyl-CoA 2-hydroxylase	catalytic activity /// protein binding /// peroxisome /// lipid metabolic process /// nervous system development /// visual perception /// electron carrier activity /// oxidoreductase activity, acting on single donors with incorporation of molecular oxygen, incorporation of two atoms of oxygen /// L-ascorbic acid binding /// metal ion binding /// phytanoyl-CoA dioxygenase activity /// response to…
8036938	0.612378	1.52878	8.08533	6.0479	7.27364e-06	0.000596528	3.85024	ADCK4	aarF domain containing kinase 4	protein serine/threonine kinase activity /// membrane /// integral to membrane /// kinase activity /// transferase activity
7897527	0.611144	1.52747	10.043	5.32892	3.52524e-05	0.00186317	2.29844	UBE4B	ubiquitination factor E4B (UFD2 homolog, yeast)	ubiquitin ligase complex /// protein polyubiquitination /// nucleus /// cytoplasm /// apoptosis /// response to UV /// enzyme binding /// ubiquitin-ubiquitin ligase activity /// protein ubiquitination during ubiquitin-dependent protein catabolic process
8152491	0.611068	1.52739	11.4903	5.15492	5.20861e-05	0.00246001	1.91484	EXT1 /// EXT1	exostoses (multiple) 1 /// exostosin 1	Golgi membrane /// skeletal system development /// ossification /// protein binding /// endoplasmic reticulum /// endoplasmic reticulum membrane /// Golgi apparatus /// glycosaminoglycan biosynthetic process /// signal transduction /// gastrulation /// endoderm development /// mesoderm development /// acetylglucosaminyltransferase activity /// heparan sulfate proteoglycan biosynthetic process ///…
8002303	0.60941	1.52563	12.481	5.57644	2.03394e-05	0.00122387	2.83914	NQO1	NAD(P)H dehydrogenase, quinone 1	NAD(P)H dehydrogenase (quinone) activity /// cytochrome-b5 reductase activity /// cytoplasm /// xenobiotic metabolic process /// nitric oxide biosynthetic process /// response to oxidative stress /// synaptic transmission, cholinergic /// electron carrier activity /// response to toxin /// oxidoreductase activity /// negative regulation of catalytic activity /// positive regulation of neuron apop…
7988093	0.606309	1.52236	9.54187	6.01013	7.8905e-06	0.000633084	3.77021	TP53BP1	tumor protein p53 binding protein 1	condensed chromosome kinetochore /// chromosome, telomeric region /// damaged DNA binding /// protein binding /// intracellular /// nucleus /// nucleoplasm /// replication fork /// cytoplasm /// DNA repair /// transcription activator activity /// telomeric DNA binding /// regulation of transcription /// positive regulation of transcription, DNA-dependent /// nucleus /// nucleoplasm /// response t…
8042402	0.605482	1.52149	6.15253	4.44589	0.000262263	0.00802626	0.330039	APLF /// PROKR1	aprataxin and PNKP like factor /// prokineticin receptor 1	single strand break repair /// nucleotide binding /// DNA-(apurinic or apyrimidinic site) lyase activity /// endodeoxyribonuclease activity /// protein binding /// nucleus /// cytoplasm /// cytosol /// double-strand break repair /// response to DNA damage stimulus /// 3'-5' exonuclease activity /// lyase activity /// metal ion binding /// nucleus /// DNA repair /// response to DNA damage stimulus…
7930894	0.605074	1.52106	8.69489	4.8842	9.61339e-05	0.00385659	1.31314	GRK5	G protein-coupled receptor kinase 5	nucleotide binding /// G-protein coupled receptor kinase activity /// signal transducer activity /// protein kinase C binding /// protein binding /// ATP binding /// phospholipid binding /// soluble fraction /// cytoplasm /// plasma membrane /// protein amino acid phosphorylation /// signal transduction /// G-protein signaling, coupled to cAMP nucleotide second messenger /// tachykinin receptor s…
7995267	0.604361	1.52031	7.1724	4.98055	7.72399e-05	0.00330998	1.5279	TP53TG3 /// TP53TG3B	TP53 target 3 /// TP53 target 3B	nucleus /// cytoplasm
8002403	0.604314	1.52026	9.52938	5.53737	2.21741e-05	0.0013091	2.75422	MTSS1L	metastasis suppressor 1-like	actin binding /// signal transduction /// cytoskeletal adaptor activity /// SH3 domain binding /// filopodium assembly
7910383	0.604285	1.52023	7.2958	4.59054	0.000188083	0.00632587	0.655313	---	---	---
8117965	0.603899	1.51982	8.55057	6.11876	6.24666e-06	0.000533035	3.99985	C6orf134	chromosome 6 open reading frame 134	---
8179149	0.603899	1.51982	8.55057	6.11876	6.24666e-06	0.000533035	3.99985	C6orf134	chromosome 6 open reading frame 134	---
7904830	0.60361	1.51951	10.8406	6.15848	5.7373e-06	0.000506765	4.08345	RNF115	ring finger protein 115	protein binding /// zinc ion binding /// metal ion binding
8008566	0.603032	1.51891	8.37174	4.86083	0.000101387	0.00402016	1.26095	STXBP4	syntaxin binding protein 4	protein binding /// cytoplasm /// protein targeting /// insulin receptor signaling pathway /// glucose transport
7930398	0.598618	1.51427	8.31365	5.98973	8.24568e-06	0.000651163	3.72693	MXI1	MAX interactor 1	DNA binding /// transcription corepressor activity /// nucleus /// negative regulation of cell proliferation /// transcription regulator activity /// cytoplasmic sequestering of transcription factor /// regulation of transcription /// DNA binding /// nucleus
7955142	0.597214	1.51279	9.52745	4.62639	0.000173234	0.00598102	0.735845	CACNB3	calcium channel, voltage-dependent, beta 3 subunit	voltage-gated ion channel activity /// voltage-gated calcium channel activity /// protein binding /// cytosol /// voltage-gated calcium channel complex /// transport /// ion transport /// calcium ion transport /// dihydropyridine-sensitive calcium channel activity /// membrane /// apical plasma membrane /// T cell receptor signaling pathway /// calcium ion binding /// protein binding
7910427	0.596915	1.51248	10.7918	5.59628	1.94679e-05	0.00118722	2.88221	GALNT2	UDP-N-acetyl-alpha-D-galactosamine:polypeptide N-acetylgalactosaminyltransferase 2 (GalNAc-T2)	immunoglobulin biosynthetic process /// polypeptide N-acetylgalactosaminyltransferase activity /// sugar binding /// extracellular region /// Golgi apparatus /// Golgi stack /// membrane /// integral to membrane /// transferase activity, transferring glycosyl groups /// protein amino acid O-linked glycosylation via serine /// protein amino acid O-linked glycosylation via threonine /// manganese i…
8110569	0.596807	1.51237	12.8123	7.37593	4.67886e-07	8.27689e-05	6.54098	SQSTM1	sequestosome 1	protein kinase C binding /// protein binding /// nucleus /// nucleoplasm /// cytoplasm /// late endosome /// cytosol /// cytosol /// cytosol /// ubiquitin-dependent protein catabolic process /// apoptosis /// anti-apoptosis /// response to stress /// immune response /// protein localization /// zinc ion binding /// induction of apoptosis by extracellular signals /// endosome transport /// chapero…
8140709	0.595073	1.51055	7.96543	4.60315	0.000182716	0.00620174	0.683658	KIAA1324L	KIAA1324-like	protein binding /// membrane /// integral to membrane /// G-protein coupled receptor activity /// G-protein coupled receptor protein signaling pathway
8102065	0.593372	1.50877	7.08661	4.63359	0.000170399	0.00591274	0.752003	BDH2	3-hydroxybutyrate dehydrogenase, type 2	3-hydroxybutyrate dehydrogenase activity /// binding /// cytoplasm /// mitochondrion /// fatty acid beta-oxidation /// oxidoreductase activity /// NAD or NADH binding /// oxidation reduction
8108620	0.588258	1.50343	9.39874	4.48005	0.000242437	0.0076299	0.406902	ZMAT2	zinc finger, matrin type 2	DNA binding /// intracellular /// nucleus /// zinc ion binding /// metal ion binding
8097801	0.587683	1.50283	8.75454	5.39648	3.03188e-05	0.00164802	2.44665	FAM160A1	family with sequence similarity 160, member A1	---
8097829	0.587095	1.50222	6.60527	4.87269	9.86855e-05	0.00393054	1.28744	FHDC1	FH2 domain containing 1	actin binding /// cellular component organization /// actin cytoskeleton organization
8128867	0.586787	1.5019	8.61955	4.44	0.000265842	0.00809613	0.316786	CDC2L6 /// CDK19	cell division cycle 2-like 6 (CDK8-like) /// cyclin-dependent kinase 19	nucleotide binding /// cyclin-dependent protein kinase activity /// protein binding /// ATP binding /// protein amino acid phosphorylation /// transferase activity
7919217	0.586264	1.50135	8.43386	4.83819	0.000106751	0.0041476	1.21037	PIAS3 /// NUDT17	protein inhibitor of activated STAT, 3 /// nudix (nucleoside diphosphate linked moiety X)-type motif 17	nucleic acid binding /// protein binding /// nucleus /// protein C-terminus binding /// zinc ion binding /// response to hormone stimulus /// potassium channel regulator activity /// nuclear speck /// SUMO ligase activity /// enzyme binding /// dendrite /// positive regulation of protein sumoylation /// synapse /// regulation of transcription /// metal ion binding /// protein N-terminus binding /…
7984626	0.581939	1.49686	8.13596	5.43046	2.81103e-05	0.0015548	2.521	SENP8	SUMO/sentrin specific peptidase family member 8	protein binding /// proteolysis /// peptidase activity /// cysteine-type peptidase activity /// modification-dependent protein catabolic process
8133549	0.581658	1.49657	6.46724	6.03836	7.42466e-06	0.000604447	3.83004	GTF2IRD2 /// GTF2IRD2B	GTF2I repeat domain containing 2 /// GTF2I repeat domain containing 2B	DNA binding /// intracellular /// nucleus /// zinc ion binding /// regulation of transcription
8148917	0.579047	1.49386	9.56921	4.53247	0.000214912	0.00699504	0.524799	MFSD3	major facilitator superfamily domain containing 3	membrane /// integral to membrane /// transmembrane transport /// transport
8030171	0.577551	1.49231	12.9967	5.92243	9.53849e-06	0.000715322	3.58373	FTL	ferritin, light polypeptide	iron ion binding /// protein binding /// cytosol /// iron ion transport /// cellular iron ion homeostasis /// post-Golgi vesicle-mediated transport /// intracellular ferritin complex /// ferric iron binding /// cellular membrane organization /// oxidoreductase activity /// cytosolic small ribosomal subunit /// identical protein binding /// oxidation reduction /// cellular iron ion homeostasis
8161945	0.576611	1.49134	5.96628	4.72182	0.000139232	0.00507589	0.949913	RASEF	RAS and EF-hand domain containing	nucleotide binding /// calcium ion binding /// GTP binding /// cytoplasm /// small GTPase mediated signal transduction /// protein transport /// perinuclear region of cytoplasm
8145977	0.575693	1.49039	11.2401	6.87476	1.2819e-06	0.000171852	5.55458	PLEKHA2	pleckstrin homology domain containing, family A (phosphoinositide binding specific) member 2	positive regulation of cell-matrix adhesion /// fibronectin binding /// protein binding /// phosphatidylinositol binding /// nucleus /// cytoplasm /// plasma membrane /// lipid binding /// membrane /// protein complex /// laminin binding /// phospholipid binding /// cellular_component /// cytoplasm /// biological_process
7960544	0.570408	1.48494	8.76883	4.8951	9.37794e-05	0.00379075	1.33747	VAMP1 /// TAPBPL	vesicle-associated membrane protein 1 (synaptobrevin 1) /// TAP binding protein-like	protein binding /// mitochondrion /// mitochondrial outer membrane /// integral to plasma membrane /// membrane /// vesicle-mediated transport /// synaptosome /// cell junction /// cytoplasmic vesicle membrane /// synaptic vesicle membrane /// cytoplasmic vesicle /// synapse /// endoplasmic reticulum /// endoplasmic reticulum membrane /// microsome /// plasma membrane /// integral to membrane ///…
8174937	0.570042	1.48457	6.73096	4.51842	0.000221962	0.0071754	0.493218	ODZ1	odz, odd Oz/ten-m homolog 1(Drosophila)	extracellular region /// immune response /// signal transduction /// nervous system development /// heparin binding /// negative regulation of cell proliferation /// membrane /// integral to membrane /// integral to plasma membrane
7973084	0.569067	1.48356	6.49792	4.3597	0.000319864	0.00922122	0.136011	ANG /// RNASE4	angiogenin, ribonuclease, RNase A family, 5 /// ribonuclease, RNase A family, 4	angiogenesis /// angiogenesis /// angiogenesis /// ovarian follicle development /// oocyte maturation /// response to hypoxia /// response to hypoxia /// placenta development /// positive regulation of endothelial cell proliferation /// DNA binding /// actin binding /// endonuclease activity /// pancreatic ribonuclease activity /// ribonuclease activity /// receptor binding /// copper ion binding…
7980958	0.568215	1.48269	10.4652	4.84141	0.000105972	0.00412697	1.21755	LGMN	legumain	cysteine-type endopeptidase activity /// protein serine/threonine kinase activity /// cytoplasm /// lysosome /// late endosome /// proteolysis /// peptidase activity /// negative regulation of multicellular organism growth /// intracellular membrane-bounded organelle /// apical part of cell
8017173	0.567751	1.48221	7.91447	5.31328	3.65069e-05	0.00189341	2.26407	LOC100134348 /// TBC1D3P2 /// TBC1D3F /// TBC1D3C /// TBC1D3G /// TBC1D3B /// TBC1D3 /// DHX40P1 /// TBC1D3H	similar to TBC1 domain family member 3 (Rab GTPase-activating protein PRC17) (Prostate cancer gene 17 protein) (TRE17 alpha protein) /// TBC1 domain family, member 3 pseudogene 2 /// TBC1 domain family, member 3F /// TBC1 domain family, member 3C /// TBC1 domain family, member 3G /// TBC1 domain family, member 3B /// TBC1 domain family, member 3 /// DEAH (Asp-Glu-Ala-His) box polypeptide 40 pseud…	GTPase activator activity /// Rab GTPase activator activity /// intracellular /// regulation of Rab GTPase activity
8053142	0.567663	1.48212	8.57836	5.84003	1.14089e-05	0.00082048	3.40767	RTKN	rhotekin	nucleotide binding /// GTPase inhibitor activity /// protein binding /// GTP binding /// cellular_component /// intracellular /// apoptosis /// signal transduction /// Rho protein signal transduction /// GTP-Rho binding /// regulation of anti-apoptosis
8093916	0.567211	1.48166	8.88247	4.99761	7.43103e-05	0.00322596	1.56586	MAN2B2	mannosidase, alpha, class 2B, member 2	alpha-mannosidase activity /// protein binding /// extracellular region /// carbohydrate metabolic process /// mannose metabolic process /// metabolic process /// zinc ion binding /// carbohydrate binding /// metal ion binding
7950235	0.565395	1.47979	8.51432	6.18196	5.45652e-06	0.000488403	4.13277	STARD10	StAR-related lipid transfer (START) domain containing 10	---
8023995	0.564415	1.47879	8.98422	6.0604	7.08061e-06	0.000583572	3.87668	FSTL3	follistatin-like 3 (secreted glycoprotein)	ossification /// hemopoietic progenitor cell differentiation /// protein binding /// extracellular region /// extracellular space /// nucleus /// regulation of gene-specific transcription from RNA polymerase II promoter /// secretory granule /// negative regulation of BMP signaling pathway /// negative regulation of activin receptor signaling pathway /// regulation of transcription /// negative r…
7935510	0.564201	1.47857	7.5459	4.60828	0.000180578	0.00616057	0.695184	MORN4	MORN repeat containing 4	---
7915425	0.563893	1.47825	6.16433	4.60563	0.00018168	0.00619088	0.68923	ZMYND12	zinc finger, MYND-type containing 12	binding /// intracellular /// zinc ion binding /// metal ion binding
7958761	0.562936	1.47727	8.09627	6.59753	2.27136e-06	0.000267539	4.99354	ACAD10 /// ACAD10	acyl-Coenzyme A dehydrogenase family, member 10 /// acyl-CoA dehydrogenase family, member 10	acyl-CoA dehydrogenase activity /// hydrolase activity /// FAD binding /// oxidation reduction /// metabolic process /// electron carrier activity
7942417	0.560163	1.47444	8.30776	4.63216	0.000170959	0.00592344	0.748791	ARHGEF17	Rho guanine nucleotide exchange factor (GEF) 17	guanyl-nucleotide exchange factor activity /// guanyl-nucleotide exchange factor activity /// Rho guanyl-nucleotide exchange factor activity /// intracellular /// cytosol /// apoptosis /// induction of apoptosis by extracellular signals /// actin cytoskeleton organization /// regulation of Rho protein signal transduction
7976216	0.558374	1.47261	8.91582	4.96509	7.99972e-05	0.00339321	1.49347	C14orf159	chromosome 14 open reading frame 159	mitochondrion
7953516	0.556521	1.47072	7.72438	4.94445	8.38321e-05	0.00350233	1.44751	RPL13P5	ribosomal protein L13 pseudogene 5	---
8012079	0.552698	1.46683	9.23482	5.16224	5.12343e-05	0.00244405	1.93104	DVL2	dishevelled, dsh homolog 2 (Drosophila)	neural tube closure /// signal transducer activity /// protein binding /// intracellular /// nucleus /// cytoplasm /// cytoplasm /// transcription from RNA polymerase II promoter /// multicellular organismal development /// segment specification /// imaginal disc pattern formation /// heart development /// Wnt receptor signaling pathway /// identical protein binding /// neural tube closure /// si…
8054486	0.552152	1.46627	6.38792	4.64172	0.000167254	0.0058376	0.770248	NPHP1	nephronophthisis 1 (juvenile)	structural molecule activity /// protein binding /// adherens junction /// signal transduction /// excretion /// visual behavior /// membrane /// cell-cell adhesion /// actin cytoskeleton organization /// cell junction
8074388	0.550348	1.46444	10.9297	5.12485	5.57374e-05	0.00259565	1.84829	SLC25A1	solute carrier family 25 (mitochondrial carrier; citrate transporter), member 1	transporter activity /// protein binding /// mitochondrion /// mitochondrial inner membrane /// mitochondrial citrate transport /// citrate transmembrane transporter activity /// membrane /// integral to membrane /// transmembrane transport /// transport
8052956	0.549356	1.46343	9.38632	5.51381	2.33615e-05	0.00135753	2.70293	EXOC6B	exocyst complex component 6B	exocyst /// vesicle docking during exocytosis /// protein transport
8048026	0.548847	1.46292	8.81399	5.60146	1.92468e-05	0.00118022	2.89343	CPS1 /// CPS1	carbamoyl-phosphate synthetase 1, mitochondrial /// carbamoyl-phosphate synthase 1, mitochondrial	urea cycle /// nucleotide binding /// carbamoyl-phosphate synthase activity /// carbamoyl-phosphate synthase (ammonia) activity /// protein binding /// ATP binding /// phospholipid binding /// cytoplasm /// mitochondrion /// mitochondrial inner membrane /// glycogen catabolic process /// glutamine metabolic process /// response to amine stimulus /// ligase activity /// citrulline biosynthetic pro…
7943376	0.548334	1.4624	7.00842	4.4834	0.000240575	0.00760004	0.414442	KIAA1377	KIAA1377	protein binding
8008564	0.548285	1.46235	7.50786	5.46473	2.60485e-05	0.00146758	2.59589	TOM1L1	target of myb1 (chicken)-like 1	protein binding /// intracellular /// lysosome /// endosome /// Golgi apparatus /// Golgi stack /// cytosol /// intracellular protein transport /// endosome membrane /// membrane /// SH3 domain binding /// protein kinase activator activity /// ubiquitin binding /// ubiquitin-dependent protein catabolic process via the multivesicular body sorting pathway
8150112	0.545464	1.45949	12.1873	4.31717	0.000352823	0.00992768	0.0402448	GSR	glutathione reductase	glutathione-disulfide reductase activity /// soluble fraction /// cytoplasm /// mitochondrion /// cytosol /// glutathione metabolic process /// spermatogenesis /// electron carrier activity /// external side of plasma membrane /// oxidoreductase activity /// protein homodimerization activity /// glutathione binding /// cell redox homeostasis /// FAD binding /// NADP or NADPH binding /// oxidation…
7934920	0.543062	1.45706	10.3348	4.95634	8.16011e-05	0.00343498	1.47398	LIPA	lipase A, lysosomal acid, cholesterol esterase	cell morphogenesis /// cytokine production /// sterol esterase activity /// lysosome /// fatty acid metabolic process /// inflammatory response /// cell proliferation /// lipid catabolic process /// sterol metabolic process /// lipase activity /// hydrolase activity /// lung development /// tissue remodeling /// homeostasis of number of cells within a tissue /// sterol esterase activity /// lysos…
8121588	0.542549	1.45654	8.97925	4.54724	0.000207739	0.00682832	0.558018	DSE	dermatan sulfate epimerase	endoplasmic reticulum /// Golgi apparatus /// membrane /// integral to membrane /// isomerase activity /// dermatan sulfate biosynthetic process /// chondroitin-glucuronate 5-epimerase activity
8161747	0.541877	1.45587	10.935	5.06511	6.37839e-05	0.00286615	1.71584	ZFAND5	zinc finger, AN1-type domain 5	in utero embryonic development /// vasculature development /// respiratory system process /// molecular_function /// DNA binding /// cellular_component /// biological_process /// zinc ion binding /// fibroblast migration /// metal ion binding /// platelet-derived growth factor receptor signaling pathway /// skeletal system morphogenesis /// smooth muscle tissue development /// face development
8010562	0.541618	1.4556	8.97174	4.91344	8.99497e-05	0.00367943	1.37838	BAIAP2	BAI1-associated protein 2	ruffle /// protein binding /// cytoplasm /// plasma membrane /// signal transduction /// axonogenesis /// protein C-terminus binding /// cytoskeletal adaptor activity /// insulin receptor signaling pathway /// SH3 domain binding /// filopodium /// filopodium assembly /// cytoplasm /// cytoskeletal adaptor activity
7927323	0.54141	1.45539	9.98791	5.69919	1.55229e-05	0.000999972	3.10488	FAM21C /// FAM21B /// FAM21D /// FAM21A	family with sequence similarity 21, member C /// family with sequence similarity 21, member B /// family with sequence similarity 21, member D /// family with sequence similarity 21, member A	early endosome /// transport /// membrane /// early endosome membrane /// retrograde transport, endosome to Golgi /// WASH complex /// protein binding /// early endosome /// retrograde transport, endosome to Golgi /// WASH complex
8162586	0.539763	1.45373	9.44871	5.56317	2.09445e-05	0.00124872	2.81032	SLC35D2	solute carrier family 35, member D2	Golgi membrane /// nucleotide-sugar transmembrane transporter activity /// cellular_component /// Golgi apparatus /// biological_process /// carbohydrate transport /// membrane /// integral to membrane
8015798	0.539297	1.45326	6.37068	4.36989	0.00031244	0.00904635	0.158951	LOC100130581	hypothetical LOC100130581	---
7939411	0.538282	1.45224	6.66788	4.39274	0.000296411	0.00871104	0.210404	C11orf74	chromosome 11 open reading frame 74	---
7904812	0.538247	1.45221	10.4268	6.35215	3.80062e-06	0.000375517	4.4881	PIAS3	protein inhibitor of activated STAT, 3	nucleic acid binding /// protein binding /// nucleus /// protein C-terminus binding /// zinc ion binding /// response to hormone stimulus /// potassium channel regulator activity /// nuclear speck /// SUMO ligase activity /// enzyme binding /// dendrite /// positive regulation of protein sumoylation /// synapse /// regulation of transcription /// metal ion binding /// protein N-terminus binding /…
8145736	0.537819	1.45178	9.35167	4.79038	0.000119047	0.00450444	1.10346	NRG1	neuregulin 1	transcription cofactor activity /// cytokine activity /// protein binding /// extracellular region /// nucleus /// plasma membrane /// cell communication /// Notch signaling pathway /// nervous system development /// growth factor activity /// embryonic development /// neural crest cell development /// membrane /// integral to membrane /// negative regulation of transcription /// transmembrane re…
8072039	0.537673	1.45163	7.7439	5.52224	2.29297e-05	0.00133946	2.72128	MYO18B	myosin XVIIIB	nucleotide binding /// motor activity /// actin binding /// protein binding /// ATP binding /// nucleus /// cytoplasm /// unconventional myosin complex /// sarcomere /// nucleus /// cytoplasm
7978558	0.537466	1.45142	9.85393	6.4135	3.33917e-06	0.000342105	4.61523	EAPP	E2F-associated phosphoprotein	nucleus /// cytoplasm /// Golgi apparatus /// nucleus /// cytoplasm
7977456	0.536122	1.45007	9.30209	4.50952	0.000226553	0.00723946	0.473189	POTEH /// POTEG /// P704P /// POTEF /// POTEE	POTE ankyrin domain family, member H /// POTE ankyrin domain family, member G /// prostate-specific P704P /// POTE ankyrin domain family, member F /// POTE ankyrin domain family, member E	protein binding /// ATP binding /// cytoplasm /// cell cortex
8068254	0.536014	1.44996	10.4912	5.20377	4.66652e-05	0.00227498	2.02282	IL10RB	interleukin 10 receptor, beta	receptor activity /// interleukin-10 receptor activity /// protein binding /// plasma membrane /// inflammatory response /// immune response /// signal transduction /// blood coagulation /// integral to membrane /// interleukin-28 receptor complex /// receptor activity /// integral to membrane
8002992	0.535934	1.44988	6.49166	4.42766	0.000273506	0.0082565	0.289004	C16orf46	chromosome 16 open reading frame 46	---
8160835	0.534709	1.44865	9.13297	5.09562	5.95367e-05	0.00272681	1.78352	C9orf23	chromosome 9 open reading frame 23	nucleic acid binding
8107909	0.531473	1.4454	7.62189	4.84417	0.000105306	0.00411065	1.22374	SLC22A4	solute carrier family 22 (organic cation/ergothioneine transporter), member 4	nucleotide binding /// transporter activity /// protein binding /// ATP binding /// mitochondrion /// plasma membrane /// integral to plasma membrane /// triglyceride metabolic process /// ion transport /// sodium ion transport /// body fluid secretion /// secondary active organic cation transmembrane transporter activity /// carnitine metabolic process /// ion transmembrane transporter activity …
7901385	0.53106	1.44499	11.0718	4.86642	0.000100104	0.00397752	1.27344	OSBPL9	oxysterol binding protein-like 9	lipid transport /// steroid metabolic process
8132305	0.530231	1.44416	7.5392	7.08888	8.29942e-07	0.000127348	5.98043	EEPD1	endonuclease/exonuclease/phosphatase family domain containing 1	DNA binding /// DNA repair /// protein secretion /// integral to membrane /// intracellular
7959002	0.529821	1.44375	8.16267	4.5906	0.000188056	0.00632587	0.655454	SDSL	serine dehydratase-like	molecular_function /// L-serine ammonia-lyase activity /// L-threonine ammonia-lyase activity /// cellular_component /// cellular amino acid metabolic process /// metabolic process /// lyase activity /// biological adhesion /// pyridoxal phosphate binding
8122327	0.529374	1.4433	8.0243	5.28942	3.85091e-05	0.00196953	2.2116	CCDC28A	coiled-coil domain containing 28A	---
8004043	0.528984	1.44291	7.28687	5.72159	1.47786e-05	0.000976354	3.1532	ENO3	enolase 3 (beta, muscle)	phosphopyruvate hydratase complex /// magnesium ion binding /// phosphopyruvate hydratase activity /// membrane fraction /// cytoplasm /// glycolysis /// aging /// lyase activity /// response to drug /// protein homodimerization activity /// skeletal muscle tissue regeneration /// protein heterodimerization activity /// phosphopyruvate hydratase activity /// cytoplasm
8117447	0.528548	1.44248	7.9163	4.87287	9.86445e-05	0.00393054	1.28785	BTN2A2	butyrophilin, subfamily 2, member A2	membrane /// integral to membrane
7982350	0.526942	1.44087	7.29611	4.66185	0.000159715	0.00565527	0.815431	LOC728498 /// LOC653073 /// LOC643699 /// GOLGA9P	Golgin subfamily A member 8-like protein 1 /// Golgin subfamily A member 8-like protein 3 /// similar to golgi autoantigen, golgin subfamily a, 8E /// golgin A9 (pseudogene)	Golgi apparatus /// membrane /// Golgi cisterna membrane
7987139	0.526942	1.44087	7.29611	4.66185	0.000159715	0.00565527	0.815431	LOC728498 /// LOC653073 /// LOC643699 /// GOLGA9P	Golgin subfamily A member 8-like protein 1 /// Golgin subfamily A member 8-like protein 3 /// similar to golgi autoantigen, golgin subfamily a, 8E /// golgin A9 (pseudogene)	Golgi apparatus /// membrane /// Golgi cisterna membrane
8025551	0.526682	1.44061	9.39022	4.41525	0.000281431	0.00839677	0.261085	C19orf66 /// ANGPTL6	chromosome 19 open reading frame 66 /// angiopoietin-like 6	angiogenesis /// receptor binding /// extracellular region /// extracellular space /// signal transduction /// multicellular organismal development /// secretory granule /// cell differentiation
8146711	0.52596	1.43989	7.4237	4.32172	0.000349141	0.00985721	0.0504872	C8orf44 /// SGK3	chromosome 8 open reading frame 44 /// serum/glucocorticoid regulated kinase family, member 3	nucleotide binding /// protein kinase activity /// protein serine/threonine kinase activity /// protein binding /// ATP binding /// early endosome /// protein amino acid phosphorylation /// anti-apoptosis /// response to stress /// cell communication /// cytoplasmic membrane-bounded vesicle /// transferase activity /// phosphoinositide binding
8017346	0.525904	1.43984	7.88352	6.01312	7.8398e-06	0.000630536	3.77655	LOC100134348 /// TBC1D3P2 /// TBC1D3F /// TBC1D3C /// TBC1D3G /// TBC1D3B /// TBC1D3 /// TBC1D3H	similar to TBC1 domain family member 3 (Rab GTPase-activating protein PRC17) (Prostate cancer gene 17 protein) (TRE17 alpha protein) /// TBC1 domain family, member 3 pseudogene 2 /// TBC1 domain family, member 3F /// TBC1 domain family, member 3C /// TBC1 domain family, member 3G /// TBC1 domain family, member 3B /// TBC1 domain family, member 3 /// TBC1 domain family, member 3H	GTPase activator activity /// Rab GTPase activator activity /// intracellular /// regulation of Rab GTPase activity
7927233	0.525693	1.43962	9.89981	5.66673	1.66701e-05	0.00105526	3.03477	FAM21C /// FAM21B /// FAM21D /// FAM21A	family with sequence similarity 21, member C /// family with sequence similarity 21, member B /// family with sequence similarity 21, member D /// family with sequence similarity 21, member A	early endosome /// transport /// membrane /// early endosome membrane /// retrograde transport, endosome to Golgi /// WASH complex /// protein binding /// early endosome /// retrograde transport, endosome to Golgi /// WASH complex
7923731	0.525572	1.4395	7.78122	5.04052	6.74306e-05	0.00298569	1.66124	DSTYK	dual serine/threonine and tyrosine protein kinase	nucleotide binding /// protein serine/threonine kinase activity /// protein tyrosine kinase activity /// protein binding /// ATP binding /// cytoplasm /// protein amino acid phosphorylation /// transferase activity
8178244	0.524543	1.43848	9.46346	4.84443	0.000105246	0.00411065	1.2243	RING1	ring finger protein 1	ubiquitin ligase complex /// sex chromatin /// chromatin binding /// ubiquitin-protein ligase activity /// protein binding /// nucleus /// nucleolus /// cytoplasm /// zinc ion binding /// anterior/posterior pattern formation /// transcription repressor activity /// chromatin modification /// histone ubiquitination /// nuclear speck /// ligase activity /// PcG protein complex /// regulation of tra…
8008598	0.523893	1.43783	9.54111	5.77127	1.32557e-05	0.000898834	3.26014	PCTP	phosphatidylcholine transfer protein	cytoplasm /// cytosol /// cytosol /// lipid transport /// cholesterol metabolic process /// lipid binding /// phosphatidylcholine transmembrane transporter activity /// phosphatidylcholine transmembrane transporter activity /// phospholipid transport /// phosphatidylcholine binding
8079796	0.520037	1.43399	9.09215	4.51639	0.000223002	0.00720204	0.488643	RNF123	ring finger protein 123	protein binding /// cytoplasm /// zinc ion binding /// ligase activity /// metal ion binding /// cytoplasm /// modification-dependent protein catabolic process
8121429	0.519878	1.43383	9.13893	4.65707	0.000161473	0.00568347	0.804707	FIG4 /// FIG4	FIG4 homolog (S. cerevisiae) /// FIG4 homolog, SAC1 lipid phosphatase domain containing (S. cerevisiae)	protein binding /// endosome /// vacuole organization /// locomotory behavior /// cell death /// endosome membrane /// membrane /// hydrolase activity /// phosphoinositide metabolic process /// pigmentation /// neuron development
8171708	0.519644	1.4336	7.51212	4.51001	0.000226297	0.00723946	0.474295	CXorf23	chromosome X open reading frame 23	mitochondrion
8093258	0.518984	1.43295	7.61355	5.23816	4.31973e-05	0.00216204	2.0987	IQCG	IQ motif containing G	---
8118634	0.517048	1.43102	9.38395	4.90338	9.20317e-05	0.00374618	1.35593	RING1	ring finger protein 1	ubiquitin ligase complex /// sex chromatin /// chromatin binding /// ubiquitin-protein ligase activity /// protein binding /// nucleus /// nucleolus /// cytoplasm /// zinc ion binding /// anterior/posterior pattern formation /// transcription repressor activity /// chromatin modification /// histone ubiquitination /// nuclear speck /// ligase activity /// PcG protein complex /// regulation of tra…
8016336	0.516283	1.43027	8.18784	4.66197	0.000159669	0.00565527	0.815711	OSBPL7	oxysterol binding protein-like 7	lipid transport /// steroid metabolic process
8105663	0.513689	1.4277	9.78248	4.95057	8.26768e-05	0.00346712	1.46113	NLN	neurolysin (metallopeptidase M3 family)	metalloendopeptidase activity /// cytoplasm /// mitochondrion /// mitochondrial intermembrane space /// proteolysis /// peptidase activity /// metal ion binding /// zinc ion binding
8145055	0.511496	1.42553	8.77995	5.53897	2.20961e-05	0.00130681	2.75769	BMP1	bone morphogenetic protein 1	skeletal system development /// cartilage condensation /// ossification /// metalloendopeptidase activity /// cytokine activity /// calcium ion binding /// extracellular space /// proteolysis /// multicellular organismal development /// growth factor activity /// peptidase activity /// metallopeptidase activity /// zinc ion binding /// cell differentiation /// membrane-bounded vesicle /// multice…
7927560	0.511018	1.42506	10.1647	5.68258	1.60995e-05	0.00102885	3.06902	FAM21C /// FAM21B /// FAM21D /// FAM21A	family with sequence similarity 21, member C /// family with sequence similarity 21, member B /// family with sequence similarity 21, member D /// family with sequence similarity 21, member A	early endosome /// transport /// membrane /// early endosome membrane /// retrograde transport, endosome to Golgi /// WASH complex /// protein binding /// early endosome /// retrograde transport, endosome to Golgi /// WASH complex
8158183	0.510987	1.42502	9.51233	4.89373	9.40735e-05	0.00379681	1.3344	DNM1	dynamin 1	nucleotide binding /// motor activity /// GTPase activity /// protein binding /// GTP binding /// cytoplasm /// cytoskeleton /// microtubule /// receptor-mediated endocytosis /// hydrolase activity /// GTPase activity /// protein binding /// receptor-mediated endocytosis
7928208	0.509768	1.42382	7.90931	6.38763	3.5263e-06	0.000355803	4.56168	SLC29A3	solute carrier family 29 (nucleoside transporters), member 3	nucleoside transmembrane transporter activity /// lysosomal membrane /// endosome /// transport /// nucleoside transport /// membrane /// integral to membrane /// late endosome membrane
7924619	0.50931	1.42337	9.66977	4.41753	0.000279958	0.00836783	0.266213	ENAH	enabled homolog (Drosophila)	actin binding /// cytoplasm /// cytosol /// cytoskeleton /// focal adhesion /// SH3 domain binding /// lamellipodium /// cell junction /// filopodium /// synapse /// intracellular transport /// WW domain binding
7919197	0.50888	1.42295	7.29774	4.65332	0.000162866	0.0057144	0.796289	POLR3GL	polymerase (RNA) III (DNA directed) polypeptide G (32kD)-like	---
8090630	0.5082	1.42227	8.71708	4.45319	0.000257894	0.00792898	0.346464	TMCC1	transmembrane and coiled-coil domain family 1	membrane /// integral to membrane
8124088	0.507026	1.42112	9.49373	5.03034	6.90028e-05	0.00303913	1.63861	KIF13A	kinesin family member 13A	nucleotide binding /// microtubule motor activity /// protein binding /// ATP binding /// microtubule /// microtubule-based movement /// protein transport
7974229	0.506277	1.42038	9.7799	4.49222	0.000235742	0.00748997	0.434295	KLHDC2	kelch domain containing 2	protein binding /// nucleus
8167369	0.505963	1.42007	7.65662	5.77561	1.31306e-05	0.000895918	3.26947	HDAC6	histone deacetylase 6	histone deacetylase complex /// protein polyubiquitination /// actin binding /// histone deacetylase activity /// protein binding /// nucleus /// cytoplasm /// microtubule /// microtubule associated complex /// caveola /// protein amino acid deacetylation /// misfolded or incompletely synthesized protein catabolic process /// intracellular protein transport /// negative regulation of microtubule …
8002029	0.504941	1.41907	7.8744	5.03108	6.88874e-05	0.00303807	1.64026	ZDHHC1	zinc finger, DHHC-type containing 1	DNA binding /// cellular_component /// biological_process /// zinc ion binding /// membrane /// integral to membrane /// palmitoyltransferase activity /// transferase activity /// protein palmitoylation /// metal ion binding /// protein binding
7905324	0.504602	1.41873	9.16433	5.00722	7.27109e-05	0.00316478	1.58722	C1orf56	chromosome 1 open reading frame 56	extracellular region
8090098	0.504208	1.41834	11.0309	4.60255	0.000182971	0.00620406	0.682295	MYLK	myosin light chain kinase	nucleotide binding /// actin binding /// myosin light chain kinase activity /// protein binding /// calmodulin binding /// ATP binding /// cytosol /// protein amino acid phosphorylation /// muscle contraction /// transferase activity /// metal ion binding /// magnesium ion binding /// myosin light chain kinase activity /// calcium ion binding /// protein amino acid phosphorylation
8025199	0.503522	1.41767	8.55266	5.71839	1.48827e-05	0.000979348	3.14629	PNPLA6	patatin-like phospholipase domain containing 6	angiogenesis /// lysophospholipase activity /// endoplasmic reticulum /// endoplasmic reticulum membrane /// metabolic process /// cell death /// organ morphogenesis /// membrane /// integral to membrane /// lipid catabolic process /// hydrolase activity /// phosphatidylcholine metabolic process
8154916	0.502876	1.41704	8.44085	4.72139	0.000139368	0.00507589	0.948956	GALT	galactose-1-phosphate uridylyltransferase	soluble fraction /// cytosol /// carbohydrate metabolic process /// galactose metabolic process /// UDP-glucose:hexose-1-phosphate uridylyltransferase activity /// zinc ion binding /// transferase activity /// nucleotidyltransferase activity /// UDP-glucose conversion /// metal ion binding /// iron ion binding /// galactose metabolic process /// UDP-glucose:hexose-1-phosphate uridylyltransferase …
8058118	0.501209	1.4154	8.1918	4.48404	0.00024022	0.00760004	0.41589	KCTD18	potassium channel tetramerisation domain containing 18	voltage-gated potassium channel activity /// protein binding /// potassium ion transport /// voltage-gated potassium channel complex /// membrane
8036923	0.500195	1.4144	9.63255	5.304	3.72727e-05	0.00192361	2.24367	NUMBL	numb homolog (Drosophila)-like	protein binding /// cytoplasm /// nervous system development /// neuroblast proliferation /// axonogenesis /// cytokine-mediated signaling pathway /// protein metabolic process /// lateral ventricle development /// neuroblast division in the subventricular zone /// forebrain development /// adherens junction organization /// positive regulation of neurogenesis /// positive regulation of dendrite …
8044793	0.496434	1.41072	10.1431	6.7813	1.55277e-06	0.000199623	5.36665	STEAP3	STEAP family member 3	ferric-chelate reductase activity /// binding /// iron ion binding /// endosome /// multivesicular body /// plasma membrane /// ion transport /// iron ion transport /// apoptosis /// cell cycle /// electron carrier activity /// protein secretion /// endosome membrane /// integral to membrane /// oxidoreductase activity /// metal ion binding /// FAD binding /// oxidation reduction /// copper ion b…
7994308	0.495438	1.40975	8.23722	4.38949	0.000298641	0.0087611	0.203081	KIAA0556	KIAA0556	---
8087308	0.4934	1.40776	10.2072	4.64671	0.000165353	0.00578944	0.781448	USP19	ubiquitin specific peptidase 19	ubiquitin thiolesterase activity /// peptidase activity /// cysteine-type peptidase activity /// zinc ion binding /// proteasomal ubiquitin-dependent protein catabolic process /// metal ion binding
7914530	0.492915	1.40729	8.96553	4.80309	0.000115644	0.00439067	1.13189	BSDC1	BSD domain containing 1	---
7993274	0.49054	1.40497	7.9437	4.56256	0.00020056	0.00662504	0.592441	RUNDC2A	RUN domain containing 2A	---
7898858	0.490093	1.40454	7.27759	4.32378	0.000347482	0.00985529	0.0551362	ZNF436 /// C1orf213	zinc finger protein 436 /// chromosome 1 open reading frame 213	DNA binding /// intracellular /// nucleus /// regulation of transcription, DNA-dependent /// zinc ion binding /// metal ion binding
7913609	0.488527	1.40301	7.22303	5.46978	2.57582e-05	0.00145554	2.60691	ASAP3	ArfGAP with SH3 domain, ankyrin repeat and PH domain 3	cytoplasm /// ARF GTPase activator activity /// zinc ion binding /// regulation of ARF GTPase activity /// metal ion binding
8125713	0.486865	1.4014	10.4119	6.07697	6.83286e-06	0.000569325	3.91169	TAPBP	TAP binding protein (tapasin)	Golgi membrane /// protein binding /// endoplasmic reticulum /// endoplasmic reticulum membrane /// microsome /// protein complex assembly /// retrograde vesicle-mediated transport, Golgi to ER /// immune response /// peptide antigen-transporting ATPase activity /// membrane /// integral to membrane /// antigen processing and presentation of endogenous peptide antigen via MHC class I /// MHC clas…
8054888	0.484973	1.39956	10.6171	4.33786	0.000336386	0.00961428	0.086825	CLASP1	cytoplasmic linker associated protein 1	microtubule cytoskeleton organization /// kinetochore /// condensed chromosome kinetochore /// microtubule bundle formation /// protein binding /// cytoplasm /// Golgi apparatus /// centrosome /// kinetochore microtubule /// cytosol /// cytoskeleton /// spindle microtubule /// cytoplasmic microtubule /// cell cortex /// negative regulation of microtubule depolymerization /// negative regulation o…
8062748	0.484024	1.39864	8.41334	5.63332	1.79414e-05	0.00111663	2.9625	IFT52	intraflagellar transport 52 homolog (Chlamydomonas)	neural tube formation /// heart looping /// smoothened signaling pathway /// determination of left/right symmetry /// dorsal/ventral pattern formation /// embryonic digit morphogenesis /// positive regulation of proteolysis
7944302	0.478844	1.39363	8.79125	4.49997	0.000231578	0.00737174	0.451727	PHLDB1	pleckstrin homology-like domain, family B, member 1	---
8131539	0.477046	1.39189	10.0073	4.88028	9.69954e-05	0.0038818	1.30439	TMEM106B	transmembrane protein 106B	molecular_function /// cellular_component /// biological_process /// membrane /// integral to membrane
8143919	0.476658	1.39152	7.97601	4.39684	0.000293624	0.0086597	0.219635	SMARCD3	SWI/SNF related, matrix associated, actin dependent regulator of chromatin, subfamily d, member 3	heart morphogenesis /// transcription coactivator activity /// receptor binding /// protein binding /// nucleus /// nucleoplasm /// regulation of transcription from RNA polymerase II promoter /// nervous system development /// transcription factor binding /// SWI/SNF complex /// chromatin modification /// transcription regulator activity /// nuclear hormone receptor binding /// muscle cell differ…
8031522	0.476655	1.39151	8.24933	4.54201	0.000210251	0.00687797	0.546257	ZNF581	zinc finger protein 581	DNA binding /// intracellular /// nucleus /// zinc ion binding /// regulation of transcription /// metal ion binding
8134680	0.475558	1.39046	9.01374	4.9789	7.75305e-05	0.00331816	1.52421	ZKSCAN1	zinc finger with KRAB and SCAN domains 1	transcription factor activity /// intracellular /// nucleus /// nucleus /// cytoplasm /// mitochondrion /// regulation of transcription, DNA-dependent /// zinc ion binding /// metal ion binding
8088106	0.474598	1.38953	12.5629	5.02601	6.9682e-05	0.00305692	1.62899	TKT	transketolase	transketolase activity /// protein binding /// cytosol /// metabolic process /// transferase activity /// metal ion binding /// transketolase activity /// calcium ion binding /// regulation of growth
7965846	0.474041	1.389	9.65344	5.35012	3.36218e-05	0.00178835	2.34499	CCDC53	coiled-coil domain containing 53	protein binding /// biological_process /// WASH complex /// molecular_function /// cellular_component
8068810	0.473892	1.38885	7.72406	5.80729	1.22528e-05	0.000858909	3.3375	SLC37A1	solute carrier family 37 (glycerol-3-phosphate transporter), member 1	carbohydrate transport /// membrane /// integral to membrane /// transmembrane transport
7916343	0.472989	1.38798	8.9291	4.3561	0.000322527	0.00926609	0.127914	YIPF1	Yip1 domain family, member 1	membrane /// integral to membrane /// transport vesicle
8119627	0.472586	1.38759	10.1465	5.59834	1.93797e-05	0.00118401	2.88667	PPP2R5D /// PPP2R5D	protein phosphatase 2, regulatory subunit B', delta isoform /// protein phosphatase 2, regulatory subunit B', delta	protein phosphatase type 2A complex /// protein binding /// nucleus /// cytoplasm /// signal transduction /// nervous system development /// protein phosphatase type 2A regulator activity /// nucleus /// protein phosphatase type 2A regulator activity
7941272	0.472571	1.38758	12.9998	4.58106	0.000192218	0.006426	0.634023	MALAT1	metastasis associated lung adenocarcinoma transcript 1 (non-protein coding)	---
8178977	0.472024	1.38705	11.2923	5.59256	1.96282e-05	0.00119481	2.87414	TAPBP	TAP binding protein (tapasin)	Golgi membrane /// protein binding /// endoplasmic reticulum /// endoplasmic reticulum membrane /// microsome /// protein complex assembly /// retrograde vesicle-mediated transport, Golgi to ER /// immune response /// peptide antigen-transporting ATPase activity /// membrane /// integral to membrane /// antigen processing and presentation of endogenous peptide antigen via MHC class I /// MHC clas…
8004699	0.47171	1.38675	9.72556	4.90863	9.09399e-05	0.00371082	1.36764	CHD3	chromodomain helicase DNA binding protein 3	nucleotide binding /// chromatin /// DNA binding /// chromatin binding /// ATP-dependent DNA helicase activity /// helicase activity /// protein binding /// ATP binding /// nucleus /// chromatin assembly or disassembly /// regulation of transcription, DNA-dependent /// regulation of transcription from RNA polymerase II promoter /// zinc ion binding /// chromatin modification /// NuRD complex /// …
8122672	0.469708	1.38483	10.6829	5.45186	2.68039e-05	0.00149998	2.56778	MAP3K7IP2 /// TAB2	mitogen-activated protein kinase kinase kinase 7 interacting protein 2 /// TGF-beta activated kinase 1/MAP3K7 binding protein 2	protein binding /// intracellular /// cytoplasm /// cytosol /// zinc ion binding /// membrane /// positive regulation of I-kappaB kinase/NF-kappaB cascade /// metal ion binding /// cytosol /// positive regulation of I-kappaB kinase/NF-kappaB cascade
8025179	0.469034	1.38418	9.65887	5.23379	4.36232e-05	0.0021777	2.08905	ZNF358	zinc finger protein 358	DNA binding /// intracellular /// nucleus /// zinc ion binding /// stem cell maintenance /// neural tube development /// embryonic forelimb morphogenesis /// regulation of transcription /// metal ion binding
7914500	0.465278	1.38058	7.92268	4.56345	0.000200148	0.006618	0.594453	C1orf91	chromosome 1 open reading frame 91	membrane /// integral to membrane
8104321	0.465207	1.38052	8.4905	4.80562	0.000114981	0.00437044	1.13754	ADAMTS16	ADAM metallopeptidase with thrombospondin type 1 motif, 16	metalloendopeptidase activity /// extracellular region /// proteinaceous extracellular matrix /// proteolysis /// peptidase activity /// zinc ion binding /// metal ion binding
8003263	0.460848	1.37635	8.72096	4.38131	0.00030432	0.00888074	0.184677	ZCCHC14	zinc finger, CCHC domain containing 14	nucleic acid binding /// protein binding /// cell communication /// zinc ion binding /// phosphoinositide binding /// metal ion binding
7959957	0.460647	1.37616	8.78032	4.43757	0.000267333	0.00811431	0.311318	ULK1	unc-51-like kinase 1 (C. elegans)	nucleotide binding /// pre-autophagosomal structure /// protein serine/threonine kinase activity /// protein binding /// ATP binding /// membrane fraction /// cytoplasm /// autophagic vacuole /// cytosol /// protein amino acid phosphorylation /// signal transduction /// Ras protein signal transduction /// protein localization /// regulation of autophagy /// transferase activity /// cerebellar gra…
7964701	0.460563	1.37608	11.3613	5.32459	3.5595e-05	0.00186647	2.28894	GNS	glucosamine (N-acetyl)-6-sulfatase	protein binding /// lysosome /// glycosaminoglycan catabolic process /// metabolic process /// N-acetylglucosamine-6-sulfatase activity /// sulfuric ester hydrolase activity /// hydrolase activity /// metal ion binding /// calcium ion binding /// N-acetylglucosamine-6-sulfatase activity
8163775	0.460238	1.37577	9.18348	4.46572	0.000250561	0.00780347	0.374671	MEGF9	multiple EGF-like-domains 9	receptor activity /// calcium ion binding /// cellular_component /// biological_process /// membrane /// integral to membrane
8032789	0.459704	1.37526	7.31668	4.3332	0.00034002	0.00970149	0.0763331	STAP2	signal transducing adaptor family member 2	protein binding /// cytoplasm
8051215	0.458504	1.37412	6.68462	4.45791	0.000255107	0.00788699	0.357088	RBKS /// LOC100302650	ribokinase /// hypothetical LOC100302650	nucleotide binding /// ribokinase activity /// ATP binding /// carbohydrate metabolic process /// D-ribose metabolic process /// kinase activity /// transferase activity
8023843	0.458328	1.37395	6.23376	4.38715	0.000300251	0.00880059	0.197826	FBXO15	F-box protein 15	protein binding /// SCF ubiquitin ligase complex /// modification-dependent protein catabolic process
8048081	0.457948	1.37359	7.93519	5.12973	5.51282e-05	0.00257809	1.85908	SPAG16	sperm associated antigen 16	protein binding /// nucleus /// cytoplasm /// cytoskeleton /// microtubule /// cilium /// spermatogenesis /// flagellum /// cell projection organization /// flagellar axoneme
8166826	0.457087	1.37277	10.6396	5.28531	3.88645e-05	0.0019787	2.20257	USP9X	ubiquitin specific peptidase 9, X-linked	cysteine-type endopeptidase activity /// ubiquitin thiolesterase activity /// protein binding /// cytoplasm /// ubiquitin-dependent protein catabolic process /// cell cycle /// chromosome segregation /// mitosis /// transforming growth factor beta receptor signaling pathway /// female gamete generation /// peptidase activity /// cysteine-type peptidase activity /// protein deubiquitination /// BM…
8158028	0.456403	1.37212	7.584	4.52833	0.000216962	0.00703426	0.51551	LRSAM1	leucine rich repeat and sterile alpha motif containing 1	protein polyubiquitination /// ubiquitin-protein ligase activity /// hormone activity /// protein binding /// extracellular region /// cytoplasm /// zinc ion binding /// protein transport /// ligase activity /// protein catabolic process /// membrane part /// negative regulation of endocytosis /// non-lytic virus budding /// metal ion binding /// protein autoubiquitination /// ubiquitin-dependent…
8169028	0.455778	1.37152	9.56443	5.24656	4.23908e-05	0.00212573	2.11722	NGFRAP1	nerve growth factor receptor (TNFRSF16) associated protein 1	death receptor binding /// protein binding /// nucleus /// cytoplasm /// cytosol /// apoptosis /// multicellular organismal development /// induction of apoptosis by extracellular signals /// induction of apoptosis via death domain receptors /// caspase regulator activity /// metal ion binding /// cytoplasm /// apoptosis
8104506	0.455492	1.37125	11.2649	6.19377	5.32065e-06	0.000481418	4.15755	TRIO	triple functional domain (PTPRF interacting)	nucleotide binding /// protein serine/threonine kinase activity /// guanyl-nucleotide exchange factor activity /// Rho guanyl-nucleotide exchange factor activity /// ATP binding /// intracellular /// cytoplasm /// cytosol /// protein amino acid phosphorylation /// apoptosis /// transmembrane receptor protein tyrosine phosphatase signaling pathway /// induction of apoptosis by extracellular signal…
8180166	0.454461	1.37027	11.4552	5.3909	3.06982e-05	0.00166204	2.43442	TAPBP	TAP binding protein (tapasin)	Golgi membrane /// protein binding /// endoplasmic reticulum /// endoplasmic reticulum membrane /// microsome /// protein complex assembly /// retrograde vesicle-mediated transport, Golgi to ER /// immune response /// peptide antigen-transporting ATPase activity /// membrane /// integral to membrane /// antigen processing and presentation of endogenous peptide antigen via MHC class I /// MHC clas…
8176219	0.454263	1.37008	8.69376	4.43894	0.000266491	0.00809613	0.314402	MTCP1NB /// MTCP1	mature T-cell proliferation 1 neighbor /// mature T-cell proliferation 1	protein binding /// mitochondrion /// cell proliferation
8079170	0.454166	1.36999	8.72529	4.99131	7.53795e-05	0.00325963	1.55183	C3orf23	chromosome 3 open reading frame 23	mitochondrion
8103188	0.453602	1.36946	8.87243	4.33813	0.000336172	0.00961428	0.0874471	PET112L	PET112-like (yeast)	nucleotide binding /// ATP binding /// mitochondrion /// translation /// translation factor activity, nucleic acid binding /// ligase activity /// carbon-nitrogen ligase activity, with glutamine as amido-N-donor /// mitochondrion /// translation
7914809	0.453009	1.36889	9.81545	4.93943	8.47943e-05	0.00353261	1.43631	KIAA0319L	KIAA0319-like	membrane /// integral to membrane
8148333	0.451108	1.36709	10.9491	5.18346	4.88458e-05	0.00235713	1.97795	EFR3A	EFR3 homolog A (S. cerevisiae)	binding /// plasma membrane
8084360	0.450168	1.3662	9.91579	5.05265	6.56068e-05	0.00293358	1.68817	ABCF3	ATP-binding cassette, sub-family F (GCN20), member 3	nucleotide binding /// ATP binding /// ATPase activity
8116335	0.449671	1.36573	8.61622	4.49049	0.000236682	0.00750553	0.430401	SQSTM1 /// C5orf45	sequestosome 1 /// chromosome 5 open reading frame 45	protein kinase C binding /// protein binding /// nucleus /// nucleoplasm /// cytoplasm /// late endosome /// cytosol /// cytosol /// cytosol /// ubiquitin-dependent protein catabolic process /// apoptosis /// anti-apoptosis /// response to stress /// immune response /// protein localization /// zinc ion binding /// induction of apoptosis by extracellular signals /// endosome transport /// chapero…
8007594	0.44946	1.36553	8.84036	4.60374	0.00018247	0.00619971	0.684977	TMUB2	transmembrane and ubiquitin-like domain containing 2	membrane /// integral to membrane
8118915	0.448928	1.36503	8.65567	4.3988	0.000292304	0.00863717	0.224037	ZNF76	zinc finger protein 76 (expressed in testis)	DNA binding /// intracellular /// nucleus /// regulation of transcription from RNA polymerase II promoter /// regulation of transcription from RNA polymerase III promoter /// zinc ion binding /// regulation of transcription /// metal ion binding
8034034	0.448858	1.36496	9.77353	5.49365	2.44294e-05	0.00140731	2.65898	KEAP1	kelch-like ECH-associated protein 1	in utero embryonic development /// protein binding /// nucleus /// nucleolus /// cytoplasm /// endoplasmic reticulum /// centrosome /// cell-cell adherens junction /// focal adhesion /// transcription regulator activity /// regulation of transcription /// regulation of epidermal cell differentiation /// nucleus /// cytoplasm
8024194	0.447916	1.36407	11.9909	4.35315	0.000324733	0.00932122	0.121257	GPX4	glutathione peroxidase 4 (phospholipid hydroperoxidase)	glutathione peroxidase activity /// soluble fraction /// nucleus /// nuclear envelope /// cytoplasm /// mitochondrion /// mitochondrial inner membrane /// cytosol /// chromatin organization /// phospholipid metabolic process /// glutathione metabolic process /// response to oxidative stress /// multicellular organismal development /// spermatogenesis /// aging /// oxidoreductase activity /// resp…
8023882	0.447833	1.36399	7.87126	4.89253	9.43303e-05	0.00380256	1.33172	ZNF516	zinc finger protein 516	DNA binding /// intracellular /// nucleus /// cytoplasm /// zinc ion binding /// regulation of transcription /// metal ion binding /// nucleus
7920575	0.447183	1.36338	7.55191	4.36553	0.000315595	0.00912186	0.149135	PBXIP1	pre-B-cell leukemia homeobox interacting protein 1	transcription corepressor activity /// protein binding /// nucleus /// cytoplasm /// cytosol /// cytoskeleton /// microtubule /// multicellular organismal development /// negative regulation of transcription /// cell differentiation /// cytoplasm
8130422	0.446063	1.36232	8.30294	4.32486	0.000346619	0.00983921	0.0575626	CNKSR3	CNKSR family member 3	protein binding /// cytoplasm /// regulation of signal transduction /// membrane
7936949	0.445061	1.36137	9.57821	4.56575	0.000199092	0.00658962	0.599631	BCCIP /// DHX32	BRCA2 and CDKN1A interacting protein /// DEAH (Asp-Glu-Ala-His) box polypeptide 32	nucleotide binding /// helicase activity /// ATP binding /// nucleus /// mitochondrion /// hydrolase activity /// regulation of cyclin-dependent protein kinase activity /// protein binding /// DNA repair /// cell cycle /// kinase regulator activity /// nuclear cyclin-dependent protein kinase holoenzyme complex /// regulation of cyclin-dependent protein kinase activity /// nucleus /// response to …
8080028	0.444296	1.36065	6.84403	4.52662	0.000217816	0.00705509	0.511663	---	---	---
7946401	0.44321	1.35963	8.52625	4.83405	0.000107763	0.00415781	1.20112	ST5	suppression of tumorigenicity 5	protein binding /// positive regulation of ERK1 and ERK2 cascade
8042161	0.442283	1.35875	9.71852	4.68751	0.000150602	0.00541533	0.872989	PEX13	peroxisomal biogenesis factor 13	fatty acid alpha-oxidation /// neuron migration /// suckling behavior /// protein binding /// membrane fraction /// peroxisome /// peroxisomal membrane /// integral to peroxisomal membrane /// locomotory behavior /// protein transport /// membrane /// integral to membrane /// protein import into peroxisome matrix, docking /// protein import into peroxisome matrix, docking /// cerebral cortex cell…
8058614	0.44183	1.35833	10.5899	4.43496	0.000268942	0.00814087	0.305454	LANCL1	LanC lantibiotic synthetase component C-like 1 (bacterial)	catalytic activity /// G-protein coupled receptor activity /// nucleus /// cytoplasm /// integral to plasma membrane /// G-protein coupled receptor protein signaling pathway /// zinc ion binding /// membrane /// SH3 domain binding /// glutathione binding /// metal ion binding /// low-density lipoprotein receptor binding /// integral to plasma membrane /// G-protein coupled receptor protein signal…
8114300	0.439962	1.35657	6.91158	4.31648	0.00035339	0.00992981	0.0386764	KLHL3	kelch-like 3 (Drosophila)	actin binding /// structural molecule activity /// protein binding /// cytoplasm /// cytoskeleton /// modification-dependent protein catabolic process
7950086	0.439947	1.35655	9.65591	4.56149	0.00020105	0.00663464	0.590052	NUMA1	nuclear mitotic apparatus protein 1	mitotic anaphase /// spindle pole /// structural molecule activity /// protein binding /// nucleus /// nucleoplasm /// spindle /// cytosol /// spindle microtubule /// nucleus organization /// nucleus /// microtubule binding /// nuclear matrix /// dendrite /// cell soma /// meiotic cell cycle
8076241	0.439622	1.35625	8.76016	4.54194	0.000210282	0.00687797	0.546109	MKL1	megakaryoblastic leukemia (translocation) 1	nucleic acid binding /// transcription coactivator activity /// actin monomer binding /// protein binding /// nucleus /// regulation of transcription /// cytoplasm /// anti-apoptosis /// positive regulation of transcription
7990839	0.43846	1.35516	7.34887	4.48347	0.000240535	0.00760004	0.414606	IL16 /// STARD5	interleukin 16 (lymphocyte chemoattractant factor) /// StAR-related lipid transfer (START) domain containing 5	cytokine activity /// protein binding /// extracellular region /// extracellular space /// intracellular /// nucleus /// cytoplasm /// chemotaxis /// immune response /// leukocyte chemotaxis /// interspecies interaction between organisms /// regulation of transcription /// induction of positive chemotaxis /// cytosol /// steroid biosynthetic process /// lipid transport /// lipid binding /// extra…
8069026	0.431502	1.34864	8.75274	4.38145	0.00030422	0.00888074	0.184996	PWP2 /// C21orf33	PWP2 periodic tryptophan protein homolog (yeast) /// chromosome 21 open reading frame 33	mitochondrion /// centriole /// serine-type endopeptidase activity /// signal transducer activity /// nucleus /// nucleolus /// proteolysis /// signal transduction
8119670	0.431345	1.34849	7.65779	5.75758	1.36587e-05	0.000918772	3.23069	KLC4	kinesin light chain 4	microtubule motor activity /// protein binding /// kinesin complex /// microtubule
8157761	0.430551	1.34775	9.97364	4.59733	0.000185176	0.00627242	0.670568	NEK6	NIMA (never in mitosis gene a)-related kinase 6	nucleotide binding /// magnesium ion binding /// protein serine/threonine kinase activity /// signal transducer activity /// protein binding /// ATP binding /// nucleus /// cytoplasm /// protein amino acid phosphorylation /// apoptosis /// cell cycle /// chromosome segregation /// mitosis /// transferase activity /// regulation of mitotic metaphase/anaphase transition /// positive regulation of I…
7906978	0.429664	1.34692	11.7635	5.14544	5.32105e-05	0.00250127	1.89386	MGST3	microsomal glutathione S-transferase 3	glutathione transferase activity /// peroxidase activity /// membrane fraction /// endoplasmic reticulum /// endoplasmic reticulum membrane /// microsome /// lipid metabolic process /// signal transduction /// membrane /// integral to membrane /// transferase activity /// glutathione transferase activity /// microsome
8007323	0.429265	1.34655	8.65736	4.46364	0.000251766	0.00782001	0.369978	CNTNAP1	contactin associated protein 1	receptor activity /// SH3/SH2 adaptor activity /// receptor binding /// protein binding /// integral to plasma membrane /// cell adhesion /// signal transduction /// membrane /// SH3 domain binding /// paranode region of axon /// myelination /// signal transduction /// paranode region of axon
8116177	0.429224	1.34651	8.22146	4.95811	8.12739e-05	0.00342871	1.47792	AGXT2L2	alanine-glyoxylate aminotransferase 2-like 2	mitochondrion /// transaminase activity /// transferase activity /// pyridoxal phosphate binding
8166098	0.427513	1.34491	9.24906	4.46656	0.000250078	0.00780347	0.376558	RAB9A	RAB9A, member RAS oncogene family	Golgi membrane /// nucleotide binding /// GTPase activity /// protein binding /// GTP binding /// lysosome /// late endosome /// endoplasmic reticulum /// endoplasmic reticulum membrane /// Golgi apparatus /// plasma membrane /// small GTPase mediated signal transduction /// protein transport /// GDP binding /// GTPase activity /// GTP binding
8024660	0.427479	1.34488	9.90528	5.22998	4.39981e-05	0.00219312	2.08065	HMG20B	high-mobility group 20B	DNA binding /// transcription factor activity /// protein binding /// nucleus /// chromatin organization /// regulation of transcription, DNA-dependent /// cell cycle /// chromatin modification
8034521	0.425174	1.34273	7.48324	4.41049	0.000284533	0.00846495	0.25037	HOOK2	hook homolog 2 (Drosophila)	protein binding /// cytoplasm /// microtubule organizing center /// cytoskeleton /// microtubule /// endocytosis /// endosome organization /// lysosome organization /// endosome to lysosome transport /// protein transport /// HOPS complex /// identical protein binding /// early endosome to late endosome transport /// FHF complex /// microtubule cytoskeleton organization /// centrosome /// microtu…
8030197	0.424356	1.34197	5.66543	4.69844	0.000146882	0.00531024	0.897497	---	---	---
8076113	0.416092	1.33431	6.54551	4.3456	0.000330435	0.00946044	0.104256	RP1-199H16.1 /// LOC646851	similar to OTTHUMP00000028720 /// similar to OTTHUMP00000028720	---
8156116	0.415586	1.33384	8.66035	4.67609	0.000154588	0.00552458	0.847392	C9orf103	chromosome 9 open reading frame 103	nucleotide binding /// molecular_function /// shikimate kinase activity /// ATP binding /// cellular_component /// carbohydrate metabolic process /// biological_process /// transferase activity /// gluconokinase activity
8042637	0.4155	1.33376	7.98822	5.23767	4.32446e-05	0.00216204	2.09762	DYSF	dysferlin, limb girdle muscular dystrophy 2B (autosomal recessive)	plasma membrane /// muscle contraction /// integral to membrane /// cytoplasmic vesicle membrane /// cytoplasmic vesicle /// sarcolemma
8000263	0.414472	1.33281	8.63193	4.61001	0.000179864	0.00614879	0.699066	COG7	component of oligomeric golgi complex 7	Golgi membrane /// protein binding /// Golgi apparatus /// protein amino acid glycosylation /// intracellular protein transport /// retrograde vesicle-mediated transport, Golgi to ER /// membrane /// Golgi transport complex /// protein localization in organelle /// protein localization in Golgi apparatus /// protein stabilization
7919168	0.413149	1.33159	8.93738	4.6787	0.00015367	0.00550189	0.853229	PDE4DIP	phosphodiesterase 4D interacting protein	nucleus /// cytoplasm /// Golgi apparatus /// microtubule organizing center /// cytoskeleton /// cytoplasm /// centrosome
8080001	0.411256	1.32984	8.69786	4.53883	0.000211792	0.00691376	0.539109	HEMK1 /// C3orf18	HemK methyltransferase family member 1 /// chromosome 3 open reading frame 18	membrane /// integral to membrane /// DNA binding /// DNA methylation /// protein amino acid methylation /// N-methyltransferase activity /// protein methyltransferase activity /// transferase activity /// methylation
8065992	0.407835	1.32669	10.0365	4.42496	0.00027521	0.00829211	0.282932	CPNE1 /// NFS1	copine I /// NFS1 nitrogen fixation 1 homolog (S. cerevisiae)	sulfur amino acid metabolic process /// protein binding /// nucleus /// cytoplasm /// mitochondrion /// mitochondrial matrix /// cytosol /// protein complex assembly /// cysteine metabolic process /// Mo-molybdopterin cofactor biosynthetic process /// metabolic process /// transferase activity /// iron incorporation into metallo-sulfur cluster /// pyridoxal phosphate binding /// cysteine desulfur…
7923489	0.405903	1.32492	9.41887	5.3168	3.622e-05	0.00188146	2.27183	KLHL12	kelch-like 12 (Drosophila)	protein binding /// Wnt receptor signaling pathway /// modification-dependent protein catabolic process
7973660	0.40489	1.32399	10.2712	4.43505	0.000268886	0.00814087	0.305656	GMPR2	guanosine monophosphate reductase 2	GMP reductase activity /// nucleotide metabolic process /// oxidoreductase activity /// metal ion binding /// oxidation reduction /// potassium ion binding
8074856	0.40281	1.32208	10.0745	4.9577	8.13491e-05	0.00342871	1.47702	PRAME	preferentially expressed antigen in melanoma	protein binding /// nucleus /// plasma membrane /// positive regulation of cell proliferation /// transcription repressor activity /// regulation of growth /// retinoic acid receptor binding /// negative regulation of apoptosis /// regulation of transcription /// negative regulation of cell differentiation /// negative regulation of retinoic acid receptor signaling pathway
7948656	0.401954	1.3213	10.6223	5.26354	4.08077e-05	0.00206187	2.15462	FTH1	ferritin, heavy polypeptide 1	ferroxidase activity /// iron ion binding /// protein binding /// cytosol /// iron ion transport /// cellular iron ion homeostasis /// intracellular sequestering of iron ion /// post-Golgi vesicle-mediated transport /// immune response /// intracellular ferritin complex /// ferric iron binding /// cell proliferation /// negative regulation of cell proliferation /// cellular membrane organization …
7977621	0.399828	1.31935	7.40778	4.84301	0.000105586	0.00411673	1.22114	NDRG2	NDRG family member 2	molecular_function /// nucleus /// cytoplasm /// Golgi apparatus /// centrosome /// cytosol /// signal transduction /// multicellular organismal development /// nervous system development /// cell differentiation /// perinuclear region of cytoplasm /// cytoplasm
8070257	0.394085	1.31411	8.36813	5.30343	3.73201e-05	0.00192361	2.24242	PIGP	phosphatidylinositol glycan anchor biosynthesis, class P	molecular_function /// biological_process /// membrane /// integral to membrane /// preassembly of GPI anchor in ER membrane /// transferase activity, transferring glycosyl groups /// phosphatidylinositol N-acetylglucosaminyltransferase activity
7933772	0.393997	1.31403	5.81833	4.50146	0.000230787	0.00735599	0.455071	ANK3	ankyrin 3, node of Ranvier (ankyrin G)	protein binding /// cytoplasm /// cytoskeleton /// signal transduction /// basolateral plasma membrane /// establishment of protein localization
8155393	0.386645	1.30735	9.00393	4.45608	0.000256183	0.00790183	0.352971	MGC21881 /// LOC554249	hypothetical locus MGC21881 /// hypothetical LOC554249	---
8161451	0.386645	1.30735	9.00393	4.45608	0.000256183	0.00790183	0.352971	MGC21881 /// LOC554249	hypothetical locus MGC21881 /// hypothetical LOC554249	---
7985577	0.386264	1.307	7.38528	5.22153	4.48406e-05	0.00221554	2.06201	ZSCAN2	zinc finger and SCAN domain containing 2	transcription factor activity /// intracellular /// nucleus /// regulation of transcription, DNA-dependent /// multicellular organismal development /// spermatogenesis /// zinc ion binding /// cell differentiation /// metal ion binding
7956593	0.383897	1.30486	10.4899	4.4524	0.000258363	0.00793607	0.344689	OS9	osteosarcoma amplified 9, endoplasmic reticulum lectin	Hrd1p ubiquitin ligase complex /// glycoprotein binding /// protein binding /// sugar binding /// endoplasmic reticulum /// endoplasmic reticulum lumen /// protein retention in ER lumen /// protein ubiquitination /// ER-associated protein catabolic process /// response to endoplasmic reticulum stress /// protein ubiquitination during ubiquitin-dependent protein catabolic process
7936937	0.376871	1.29852	10.6567	5.09477	5.96516e-05	0.00272832	1.78162	UROS	uroporphyrinogen III synthase	uroporphyrinogen-III synthase activity /// mitochondrion /// cytosol /// uroporphyrinogen III biosynthetic process /// heme biosynthetic process /// heme biosynthetic process /// response to amine stimulus /// lyase activity /// response to antibiotic /// response to arsenic /// cofactor binding
8152119	0.376412	1.29811	8.81769	4.52269	0.000219794	0.00711224	0.502818	NCALD	neurocalcin delta	actin binding /// calcium ion binding /// intracellular /// cytosol /// tubulin binding /// vesicle-mediated transport /// clathrin coat of trans-Golgi network vesicle /// clathrin binding
8048468	0.375173	1.297	9.34894	4.85323	0.000103156	0.00406236	1.24397	FAM134A	family with sequence similarity 134, member A	endoplasmic reticulum /// membrane /// integral to membrane
7991323	0.364463	1.2874	7.57269	4.59336	0.000186868	0.00629771	0.661662	PEX11A	peroxisomal biogenesis factor 11 alpha	peroxisome /// peroxisomal membrane /// integral to peroxisomal membrane /// peroxisome organization /// signal transduction /// membrane /// integral to membrane /// peroxisome membrane biogenesis /// peroxisome fission /// brown fat cell differentiation
7901748	0.35456	1.2786	7.74541	5.08147	6.14699e-05	0.00279612	1.75213	FGGY	FGGY carbohydrate kinase domain containing	molecular_function /// cellular_component /// carbohydrate metabolic process /// kinase activity /// transferase activity /// phosphotransferase activity, alcohol group as acceptor /// neuron homeostasis /// neuron maintenance
7912086	-0.342657	0.788588	11.0106	-4.96304	8.03694e-05	0.00340465	1.48891	NOL9	nucleolar protein 9	nucleus /// nucleolus
7898616	-0.344211	0.787739	7.24727	-4.37094	0.000311686	0.00903581	0.161311	PLA2G2F	phospholipase A2, group IIF	phospholipase A2 activity /// calcium ion binding /// extracellular region /// phospholipid metabolic process /// biological_process /// lipid catabolic process /// hydrolase activity
8144880	-0.357658	0.780431	8.94089	-4.53002	0.000216124	0.00702077	0.519294	SH2D4A	SH2 domain containing 4A	protein binding /// cytoplasm
8097717	-0.370669	0.773424	8.55545	-4.31693	0.000353016	0.00992768	0.0397097	ARHGAP10	Rho GTPase activating protein 10	GTPase activator activity /// Rho GTPase activator activity /// protein binding /// intracellular /// cytoplasm /// plasma membrane /// cytoskeleton organization /// signal transduction /// perinuclear region of cytoplasm
8024572	-0.372243	0.772581	6.61789	-4.89871	9.30134e-05	0.00376772	1.34552	GNA15	guanine nucleotide binding protein (G protein), alpha 15 (Gq class)	nucleotide binding /// GTPase activity /// signal transducer activity /// GTP binding /// heterotrimeric G-protein complex /// plasma membrane /// protein amino acid ADP-ribosylation /// signal transduction /// G-protein coupled receptor protein signaling pathway /// activation of phospholipase C activity /// elevation of cytosolic calcium ion concentration /// activation of phospholipase C activ…
7926807	-0.373351	0.771987	10.8191	-4.33252	0.000340554	0.00970563	0.0748013	PDSS1	prenyl (decaprenyl) diphosphate synthase, subunit 1	trans-hexaprenyltranstransferase activity /// ubiquinone biosynthetic process /// isoprenoid biosynthetic process /// transferase activity /// metal ion binding /// protein heterodimerization activity /// trans-octaprenyltranstransferase activity /// protein heterotetramerization
8161026	-0.377318	0.769867	9.02343	-4.33424	0.000339203	0.00968648	0.0786817	CCDC107 /// C9orf100	coiled-coil domain containing 107 /// chromosome 9 open reading frame 100	guanyl-nucleotide exchange factor activity /// Rho guanyl-nucleotide exchange factor activity /// intracellular /// regulation of Rho protein signal transduction /// membrane /// integral to membrane
8110090	-0.385404	0.765565	11.9518	-4.34569	0.000330367	0.00946044	0.104455	SFXN1	sideroflexin 1	protein binding /// mitochondrion /// mitochondrial inner membrane /// cation transport /// iron ion transport /// cation transmembrane transporter activity /// membrane /// integral to membrane /// erythrocyte differentiation /// transmembrane transport /// iron ion binding
8104234	-0.393133	0.761474	12.1801	-4.57385	0.000195426	0.0065136	0.617824	TRIP13 /// BRD9	thyroid hormone receptor interactor 13 /// bromodomain containing 9	nucleotide binding /// pachytene /// oocyte maturation /// male germ cell nucleus /// transcription cofactor activity /// protein binding /// ATP binding /// nucleus /// double-strand break repair /// transcription from RNA polymerase II promoter /// reciprocal meiotic recombination /// male meiosis I /// female meiosis I /// spermatid development /// nucleoside-triphosphatase activity /// identi…
8011200	-0.395917	0.760006	8.65119	-5.55847	2.11632e-05	0.00125834	2.8001	SMYD4	SET and MYND domain containing 4	binding /// zinc ion binding /// metal ion binding
8002057	-0.403265	0.756145	8.99673	-4.64006	0.00016789	0.00584909	0.766532	ACD	adrenocortical dysplasia homolog (mouse)	telomere maintenance /// chromosome, telomeric region /// nuclear telomere cap complex /// skeletal system development /// urogenital system development /// DNA binding /// protein binding /// nucleus /// nucleoplasm /// chromosome /// intracellular protein transport /// telomere capping /// telomere capping /// embryonic limb morphogenesis /// protection from non-homologous end joining at telome…
7954655	-0.405935	0.754747	9.30489	-5.07458	6.24339e-05	0.00282799	1.73685	DDX12 /// DDX11 /// LOC642846	DEAD/H (Asp-Glu-Ala-Asp/His) box polypeptide 12 (CHL1-like helicase homolog, S. cerevisiae) /// DEAD/H (Asp-Glu-Ala-Asp/His) box polypeptide 11 (CHL1-like helicase homolog, S. cerevisiae) /// DEAD/H (Asp-Glu-Ala-Asp/His) box polypeptide 11-like	mitotic sister chromatid segregation /// S phase of mitotic cell cycle /// G2/M transition of mitotic cell cycle /// nucleotide binding /// DNA binding /// DNA helicase activity /// RNA binding /// ATP-dependent DNA helicase activity /// helicase activity /// ATP binding /// nucleus /// nucleolus /// nucleobase, nucleoside, nucleotide and nucleic acid metabolic process /// cell cycle /// positive…
8006690	-0.40647	0.754467	11.2162	-4.68203	0.0001525	0.00546589	0.860715	AATF	apoptosis antagonizing transcription factor	transcription factor activity /// protein binding /// nucleus /// nucleolus /// cytoplasm /// Golgi apparatus /// apoptosis /// anti-apoptosis /// response to DNA damage stimulus /// cell adhesion /// regulation of mitotic cell cycle /// induction of apoptosis by extracellular signals /// negative regulation of oxygen and reactive oxygen species metabolic process /// protein domain specific bindi…
7910001	-0.407614	0.753869	11.338	-4.32149	0.000349326	0.00985721	0.0499691	DEGS1	degenerative spermatocyte homolog 1, lipid desaturase (Drosophila)	protein binding /// membrane fraction /// endoplasmic reticulum /// endoplasmic reticulum membrane /// integral to plasma membrane /// unsaturated fatty acid biosynthetic process /// electron carrier activity /// membrane /// oxidoreductase activity, acting on paired donors, with incorporation or reduction of molecular oxygen /// oxidation reduction /// endoplasmic reticulum
8093539	-0.411235	0.75198	8.99462	-4.42502	0.000275169	0.00829211	0.283076	WHSC1	Wolf-Hirschhorn syndrome candidate 1	DNA binding /// protein binding /// nucleus /// cytoplasm /// methyltransferase activity /// zinc ion binding /// anatomical structure morphogenesis /// chromatin modification /// transferase activity /// histone-lysine N-methyltransferase activity /// regulation of transcription /// metal ion binding /// nucleus
7942914	-0.412004	0.751578	10.0409	-4.38056	0.000304851	0.00888845	0.182974	EED	embryonic ectoderm development	protein binding /// nucleus /// negative regulation of transcription /// transcription repressor activity /// chromatin modification /// ESC/E(Z) complex /// histone methyltransferase activity /// identical protein binding
7911993	-0.416106	0.749445	10.674	-5.71634	1.49498e-05	0.000979888	3.14187	ICMT	isoprenylcysteine carboxyl methyltransferase	in utero embryonic development /// liver development /// C-terminal protein carboxyl methyltransferase activity /// protein-S-isoprenylcysteine O-methyltransferase activity /// membrane fraction /// endoplasmic reticulum /// endoplasmic reticulum membrane /// protein modification process /// C-terminal protein amino acid methylation /// protein targeting to membrane /// protein localization /// c…
8022022	-0.417038	0.748961	8.56369	-5.09222	5.99956e-05	0.00273781	1.77597	LPIN2	lipin 2	transcription coactivator activity /// nucleus /// cytoplasm /// endoplasmic reticulum /// endoplasmic reticulum membrane /// cytosol /// lipid metabolic process /// fatty acid metabolic process /// phosphatidate phosphatase activity /// membrane /// hydrolase activity /// regulation of transcription /// positive regulation of transcription from RNA polymerase II promoter /// phosphatidate phosph…
8122426	-0.417612	0.748663	9.46729	-4.36654	0.000314857	0.00910842	0.151423	PHACTR2	phosphatase and actin regulator 2	actin binding /// phosphoprotein phosphatase inhibitor activity /// protein binding
8158147	-0.421811	0.746487	7.30758	-4.32492	0.00034657	0.00983921	0.0577026	SLC25A25 /// LOC100292202	solute carrier family 25 (mitochondrial carrier; phosphate carrier), member 25 /// similar to solute carrier family 25, member 25	binding /// calcium ion binding /// mitochondrion /// mitochondrial inner membrane /// membrane /// integral to membrane /// transmembrane transport /// transport
7961031	-0.421839	0.746472	9.06918	-4.93243	8.61518e-05	0.00356791	1.42072	DDX12 /// DDX11 /// LOC642846 /// LOC100134008	DEAD/H (Asp-Glu-Ala-Asp/His) box polypeptide 12 (CHL1-like helicase homolog, S. cerevisiae) /// DEAD/H (Asp-Glu-Ala-Asp/His) box polypeptide 11 (CHL1-like helicase homolog, S. cerevisiae) /// DEAD/H (Asp-Glu-Ala-Asp/His) box polypeptide 11-like /// similar to DEAD/H (Asp-Glu-Ala-Asp/His) box polypeptide 11 (CHL1-like helicase homolog, S. cerevisiae)	mitotic sister chromatid segregation /// S phase of mitotic cell cycle /// G2/M transition of mitotic cell cycle /// nucleotide binding /// DNA binding /// DNA helicase activity /// RNA binding /// ATP-dependent DNA helicase activity /// helicase activity /// ATP binding /// nucleus /// nucleolus /// nucleobase, nucleoside, nucleotide and nucleic acid metabolic process /// cell cycle /// positive…
8098508	-0.423346	0.745693	8.25855	-4.92423	8.77713e-05	0.00361251	1.40244	ING2	inhibitor of growth family, member 2	DNA binding /// chromatin binding /// protein binding /// nucleus /// regulation of transcription, DNA-dependent /// signal transduction /// zinc ion binding /// transcription activator activity /// chromatin modification /// Sin3 complex /// CCAAT-binding factor complex /// positive regulation of transforming growth factor beta receptor signaling pathway /// protein complex binding /// regulatio…
8135422	-0.423985	0.745363	9.25919	-4.63795	0.000168706	0.0058698	0.761785	BCAP29	B-cell receptor-associated protein 29	endoplasmic reticulum /// endoplasmic reticulum membrane /// intracellular protein transport /// apoptosis /// membrane /// integral to membrane /// vesicle-mediated transport
8132667	-0.424724	0.744981	8.57974	-4.93533	8.5587e-05	0.00355779	1.42717	ADCY1	adenylate cyclase 1 (brain)	nucleotide binding /// adenylate cyclase activity /// calmodulin binding /// ATP binding /// plasma membrane /// plasma membrane /// cAMP biosynthetic process /// activation of adenylate cyclase activity by G-protein signaling pathway /// inhibition of adenylate cyclase activity by G-protein signaling pathway /// long-term memory /// calcium- and calmodulin-responsive adenylate cyclase activity /…
7996934	-0.42743	0.743585	11.9155	-5.36511	3.25154e-05	0.00174623	2.37789	NIP7	nuclear import 7 homolog (S. cerevisiae)	RNA binding /// protein binding /// nucleus /// nucleolus /// ribosome assembly
8144281	-0.429528	0.742505	8.42587	-4.51355	0.00022446	0.00721413	0.482269	ARHGEF10	Rho guanine nucleotide exchange factor (GEF) 10	guanyl-nucleotide exchange factor activity /// Rho guanyl-nucleotide exchange factor activity /// intracellular /// regulation of Rho protein signal transduction
8013015	-0.430235	0.742141	9.45284	-4.77873	0.000122256	0.00460493	1.07737	CENPV	centromere protein V	kinetochore /// condensed chromosome kinetochore /// molecular_function /// nucleus /// cytoplasm /// cytoskeleton /// cell cycle /// mitosis /// metabolic process /// carbon-sulfur lyase activity /// centromeric heterochromatin formation /// positive regulation of cytokinesis /// regulation of chromosome organization /// centromere complex assembly /// spindle midzone /// cell division
8180310	-0.431723	0.741376	12.0082	-4.65772	0.000161233	0.00568104	0.806162	---	---	---
7916862	-0.433353	0.740539	10.922	-4.60525	0.000181839	0.00619088	0.688374	GPR177 /// WLS	G protein-coupled receptor 177 /// wntless homolog (Drosophila)	signal transducer activity /// membrane /// integral to membrane /// positive regulation of I-kappaB kinase/NF-kappaB cascade
8103630	-0.43637	0.738992	9.7766	-4.3913	0.000297396	0.00873228	0.207162	SH3RF1	SH3 domain containing ring finger 1	MAP-kinase scaffold activity /// protein binding /// cytoplasm /// Golgi apparatus /// induction of apoptosis /// zinc ion binding /// ligase activity /// lamellipodium /// regulation of JNK cascade /// metal ion binding /// perinuclear region of cytoplasm
7975760	-0.436933	0.738703	10.9655	-4.66711	0.000157803	0.00560765	0.827229	EIF2B2	eukaryotic translation initiation factor 2B, subunit 2 beta, 39kDa	ovarian follicle development /// translation initiation factor activity /// guanyl-nucleotide exchange factor activity /// guanyl-nucleotide exchange factor activity /// protein binding /// ATP binding /// GTP binding /// cytoplasm /// eukaryotic translation initiation factor 2B complex /// translational initiation /// regulation of translational initiation /// central nervous system development …
7939341	-0.437962	0.738177	13.1546	-4.41811	0.000279585	0.00836418	0.267517	CD44	CD44 molecule (Indian blood group)	regulation of cell growth /// branching involved in ureteric bud morphogenesis /// blood vessel maturation /// healing during inflammatory response /// receptor activity /// receptor signaling protein activity /// protein binding /// collagen binding /// hyaluronic acid binding /// nucleus /// cytoplasm /// Golgi apparatus /// plasma membrane /// integral to plasma membrane /// focal adhesion ///…
7953844	-0.437967	0.738174	9.0794	-5.01914	7.07737e-05	0.00309259	1.61373	DDX12 /// DDX11 /// LOC642846 /// LOC100134008	DEAD/H (Asp-Glu-Ala-Asp/His) box polypeptide 12 (CHL1-like helicase homolog, S. cerevisiae) /// DEAD/H (Asp-Glu-Ala-Asp/His) box polypeptide 11 (CHL1-like helicase homolog, S. cerevisiae) /// DEAD/H (Asp-Glu-Ala-Asp/His) box polypeptide 11-like /// similar to DEAD/H (Asp-Glu-Ala-Asp/His) box polypeptide 11 (CHL1-like helicase homolog, S. cerevisiae)	mitotic sister chromatid segregation /// S phase of mitotic cell cycle /// G2/M transition of mitotic cell cycle /// nucleotide binding /// DNA binding /// DNA helicase activity /// RNA binding /// ATP-dependent DNA helicase activity /// helicase activity /// ATP binding /// nucleus /// nucleolus /// nucleobase, nucleoside, nucleotide and nucleic acid metabolic process /// cell cycle /// positive…
8094556	-0.441047	0.7366	11.4658	-4.45508	0.000256773	0.00790183	0.350722	PGM2	phosphoglucomutase 2	magnesium ion binding /// phosphoglucomutase activity /// cytoplasm /// carbohydrate metabolic process /// glucose metabolic process /// isomerase activity
8155268	-0.443104	0.73555	10.0723	-4.66783	0.000157542	0.00560437	0.828847	POLR1E	polymerase (RNA) I polypeptide E, 53kDa	DNA binding /// DNA-directed RNA polymerase activity /// protein binding /// nucleus /// nucleolus /// transcription /// rRNA transcription
8140037	-0.443705	0.735244	10.5899	-5.55608	2.12753e-05	0.00126275	2.79491	BAZ1B	bromodomain adjacent to zinc finger domain, 1B	nucleotide binding /// condensed chromosome /// chromatin binding /// transcription factor activity /// protein tyrosine kinase activity /// non-membrane spanning protein tyrosine kinase activity /// protein binding /// ATP binding /// nucleus /// centromeric heterochromatin /// chromatin assembly or disassembly /// chromatin remodeling /// transcription /// response to DNA damage stimulus /// zi…
7972055	-0.44498	0.734595	8.19564	-4.36446	0.000316372	0.00913617	0.146733	KCTD12	potassium channel tetramerisation domain containing 12	voltage-gated potassium channel activity /// protein binding /// potassium ion transport /// voltage-gated potassium channel complex /// membrane
7966052	-0.445484	0.734338	8.69824	-4.44219	0.000264508	0.00807269	0.321707	CRY1	cryptochrome 1 (photolyase-like)	nucleotide binding /// DNA binding /// DNA photolyase activity /// protein binding /// nucleus /// cytoplasm /// mitochondrion /// DNA repair /// circadian rhythm /// G-protein coupled photoreceptor activity /// protein-chromophore linkage /// regulation of transcription /// response to stimulus /// circadian rhythm
8099008	-0.447326	0.733401	6.98796	-4.81247	0.000113198	0.00431252	1.15286	ZFYVE28	zinc finger, FYVE domain containing 28	protein binding /// cytoplasm /// endosome /// cytosol /// negative regulation of epidermal growth factor receptor activity /// zinc ion binding /// membrane /// early endosome membrane /// phosphatidylinositol-3-phosphate binding /// negative regulation of epidermal growth factor receptor signaling pathway /// metal ion binding /// phosphatidylinositol 3-phosphate binding
7983991	-0.450223	0.73193	7.01108	-5.64533	1.74736e-05	0.0010957	2.98848	FAM81A	family with sequence similarity 81, member A	---
7897685	-0.450383	0.731848	9.83086	-4.63994	0.000167935	0.00584909	0.766271	UBIAD1	UbiA prenyltransferase domain containing 1	prenyltransferase activity /// nucleus /// cytoplasm /// membrane /// integral to membrane
7909967	-0.452672	0.730688	12.2174	-4.65893	0.000160785	0.00567725	0.808891	CAPN2	calpain 2, (m/II) large subunit	response to hypoxia /// blastocyst development /// calcium-dependent cysteine-type endopeptidase activity /// calcium ion binding /// protein binding /// intracellular /// soluble fraction /// insoluble fraction /// cytoplasm /// plasma membrane /// proteolysis /// myoblast fusion /// cytoskeletal protein binding /// peptidase activity /// cysteine-type peptidase activity
8080487	-0.453399	0.73032	9.67196	-4.54437	0.000209114	0.00685997	0.551563	PRKCD	protein kinase C, delta	nucleotide binding /// calcium-independent protein kinase C activity /// protein binding /// ATP binding /// nucleus /// cytoplasm /// cytosol /// plasma membrane /// protein amino acid phosphorylation /// signal transduction /// protein C-terminus binding /// enzyme activator activity /// senescence /// regulation of receptor activity /// immunoglobulin mediated immune response /// transferase a…
8140129	-0.457386	0.728305	9.40218	-5.9871	8.29262e-06	0.000651225	3.72135	ABHD11	abhydrolase domain containing 11	molecular_function /// cellular_component /// biological_process /// hydrolase activity
8104693	-0.458989	0.727496	7.60394	-4.41896	0.00027904	0.0083629	0.269425	PDZD2	PDZ domain containing 2	protein binding /// extracellular region /// nucleus /// cytoplasm /// endoplasmic reticulum /// cell-cell junction /// cell adhesion
8091485	-0.461895	0.726032	9.743	-4.72196	0.000139186	0.00507589	0.95024	SIAH2	seven in absentia homolog 2 (Drosophila)	transcription corepressor activity /// ubiquitin-protein ligase activity /// protein binding /// nucleus /// cytoplasm /// ubiquitin-dependent protein catabolic process /// apoptosis /// cell cycle /// small GTPase mediated signal transduction /// multicellular organismal development /// zinc ion binding /// protein ubiquitination /// ligase activity /// metal ion binding /// cytoplasm /// ubiqui…
8028389	-0.468231	0.722851	7.57377	-4.37077	0.000311804	0.00903581	0.16094	SPRED3	sprouty-related, EVH1 domain containing 3	inactivation of MAPK activity /// plasma membrane /// multicellular organismal development /// regulation of signal transduction
8041447	-0.4691	0.722415	11.4473	-4.39587	0.000294282	0.00867142	0.217449	CRIM1	cysteine rich transmembrane BMP regulator 1 (chordin-like)	regulation of cell growth /// enzyme inhibitor activity /// serine-type endopeptidase inhibitor activity /// insulin-like growth factor receptor activity /// insulin-like growth factor binding /// extracellular region /// plasma membrane /// nervous system development /// integral to membrane /// integral to membrane
8008310	-0.472803	0.720563	8.57073	-4.9494	8.28961e-05	0.00347194	1.45853	EME1	essential meiotic endonuclease 1 homolog 1 (S. pombe)	DNA binding /// endonuclease activity /// protein binding /// nucleus /// nucleolus /// DNA repair /// DNA recombination /// hydrolase activity /// metal ion binding /// magnesium ion binding /// protein binding /// response to DNA damage stimulus
7957737	-0.474944	0.719494	11.5739	-4.90168	9.23877e-05	0.00375151	1.35214	TMPO	thymopoietin	chromatin /// DNA binding /// protein binding /// lamin binding /// nucleus /// nuclear envelope /// nuclear envelope /// nuclear inner membrane /// chromosome /// membrane /// integral to membrane /// nuclear membrane /// regulation of transcription /// nucleus
8076339	-0.475542	0.719197	10.2921	-5.4883	2.47208e-05	0.00141927	2.64732	PHF5A	PHD finger protein 5A	nuclear mRNA splicing, via spliceosome /// transcription factor activity /// nucleus /// spliceosomal complex /// U2 snRNP /// RNA splicing /// nuclear matrix /// regulation of transcription /// positive regulation of transcription, DNA-dependent /// nuclear mRNA splicing, via spliceosome /// RNA splicing
7953166	-0.477753	0.718095	7.77971	-4.44773	0.000261156	0.00799975	0.334172	TSPAN9	tetraspanin 9	membrane fraction /// integral to plasma membrane /// membrane
8046373	-0.478959	0.717495	8.24795	-4.64702	0.000165233	0.00578944	0.782156	DLX1	distal-less homeobox 1	negative regulation of transcription from RNA polymerase II promoter /// DNA binding /// chromatin binding /// transcription factor activity /// nucleus /// regulation of transcription, DNA-dependent /// multicellular organismal development /// proximal/distal pattern formation /// hippocampus development /// forebrain neuron differentiation /// regulation of transcription from RNA polymerase II …
7972567	-0.479889	0.717033	8.52362	-5.1105	5.75704e-05	0.00267353	1.8165	ZIC5	Zic family member 5 (odd-paired homolog, Drosophila)	neural tube closure /// DNA binding /// intracellular /// nucleus /// multicellular organismal development /// nervous system development /// zinc ion binding /// cell differentiation /// forebrain development /// metal ion binding
7993248	-0.480512	0.716723	7.92932	-4.65808	0.000161098	0.00568104	0.806985	C16orf75	chromosome 16 open reading frame 75	DNA binding /// nucleus /// DNA replication
7984319	-0.480575	0.716692	10.5755	-4.8528	0.000103258	0.00406236	1.24301	MAP2K1 /// SNAPC5	mitogen-activated protein kinase kinase 1 /// small nuclear RNA activating complex, polypeptide 5, 19kDa	nucleotide binding /// activation of MAPK activity /// regulation of vascular smooth muscle contraction /// protein kinase activity /// protein serine/threonine kinase activity /// MAP kinase kinase activity /// protein tyrosine kinase activity /// receptor signaling protein tyrosine phosphatase activity /// protein binding /// ATP binding /// soluble fraction /// Golgi apparatus /// cytosol /// …
8029306	-0.481995	0.715987	7.34626	-4.60858	0.000180455	0.00616057	0.695854	LOC390940	similar to R28379_1	phospholipase inhibitor activity /// extracellular region
8097920	-0.482657	0.715658	5.96267	-5.35933	3.29377e-05	0.00176607	2.3652	LRAT	lecithin retinol acyltransferase (phosphatidylcholine--retinol O-acyltransferase)	retinoic acid binding /// endoplasmic reticulum /// endoplasmic reticulum membrane /// microsome /// visual perception /// acyltransferase activity /// embryonic development /// membrane /// integral to membrane /// transferase activity /// retinol binding /// retinol metabolic process /// phosphatidylcholine-retinol O-acyltransferase activity /// response to stimulus
8029437	-0.485745	0.714128	10.2316	-5.43318	2.79403e-05	0.0015489	2.52696	PVR	poliovirus receptor	viral receptor activity /// positive regulation of natural killer cell mediated cytotoxicity directed against tumor cell target /// receptor activity /// protein binding /// extracellular region /// extracellular space /// cytoplasm /// plasma membrane /// cell surface /// integral to membrane /// cell-cell adhesion /// cell migration /// susceptibility to natural killer cell mediated cytotoxicit…
7948332	-0.487217	0.7134	9.37602	-5.0751	6.23602e-05	0.00282799	1.73801	LPXN	leupaxin	cytoplasm /// protein complex assembly /// cell adhesion /// signal transduction /// zinc ion binding /// metal ion binding
8114658	-0.487522	0.713249	10.4646	-5.58567	1.9929e-05	0.00120431	2.85919	DIAPH1	diaphanous homolog 1 (Drosophila)	actin binding /// receptor binding /// protein binding /// cytoplasm /// cytoskeleton /// plasma membrane /// sensory perception of sound /// cellular component organization /// actin cytoskeleton organization /// actin filament polymerization /// ruffle membrane /// cell projection /// sensory perception of sound /// Rho GTPase binding
8157383	-0.489384	0.712329	8.44399	-4.61704	0.000176989	0.00607546	0.714844	COL27A1	collagen, type XXVII, alpha 1	extracellular matrix structural constituent /// extracellular region /// collagen /// cell adhesion
7954604	-0.490298	0.711878	9.70477	-5.25539	4.156e-05	0.00209353	2.13667	KLHDC5	kelch domain containing 5	protein binding
8069565	-0.491492	0.711289	9.68291	-4.4049	0.000288225	0.00855351	0.23777	BTG3	BTG family, member 3	cytoplasm /// negative regulation of cell proliferation /// negative regulation of mitotic cell cycle
7929990	-0.492469	0.710808	9.91474	-4.98233	7.69287e-05	0.00330089	1.53186	PPRC1	peroxisome proliferator-activated receptor gamma, coactivator-related 1	nucleotide binding /// RNA binding /// nucleus /// regulation of transcription
7959574	-0.49397	0.710068	11.1681	-5.15624	5.19318e-05	0.00245621	1.91776	SETD8	SET domain containing (lysine methyltransferase) 8	transcription corepressor activity /// protein binding /// nucleus /// chromosome /// cell cycle /// mitosis /// methyltransferase activity /// negative regulation of transcription /// transcription repressor activity /// chromatin modification /// transferase activity /// histone-lysine N-methyltransferase activity /// cell division
8059279	-0.494717	0.709701	6.84812	-4.39851	0.000292494	0.00863717	0.223404	EPHA4	EPH receptor A4	nucleotide binding /// transmembrane receptor protein tyrosine kinase activity /// receptor activity /// ephrin receptor activity /// protein binding /// ATP binding /// integral to plasma membrane /// protein amino acid phosphorylation /// signal transduction /// transmembrane receptor protein tyrosine kinase signaling pathway /// axon guidance /// adult walking behavior /// membrane /// transfe…
8140151	-0.49527	0.709429	11.3113	-4.38219	0.000303709	0.00887848	0.18664	RFC2	replication factor C (activator 1) 2, 40kDa	nucleotide binding /// DNA clamp loader activity /// protein binding /// ATP binding /// nucleus /// nucleoplasm /// DNA replication factor C complex /// DNA replication /// nucleotide-excision repair, DNA gap filling /// nucleoside-triphosphatase activity /// ATP binding /// DNA replication
7996290	-0.49744	0.708363	8.54208	-4.35737	0.000321587	0.00925487	0.130764	CKLF /// CMTM1	chemokine-like factor /// CKLF-like MARVEL transmembrane domain containing 1	extracellular region /// extracellular space /// chemotaxis /// chemokine activity /// cell proliferation /// membrane /// integral to membrane /// neutrophil chemotaxis /// secretion by cell /// macrophage chemotaxis /// lymphocyte chemotaxis /// cytokine activity /// integral to membrane
8053733	-0.502413	0.705925	11.4992	-4.59496	0.000186185	0.00629771	0.665246	SETD8	SET domain containing (lysine methyltransferase) 8	transcription corepressor activity /// protein binding /// nucleus /// chromosome /// cell cycle /// mitosis /// methyltransferase activity /// negative regulation of transcription /// transcription repressor activity /// chromatin modification /// transferase activity /// histone-lysine N-methyltransferase activity /// cell division
7965359	-0.503292	0.705495	10.6897	-4.72102	0.000139485	0.00507589	0.948135	ATP2B1	ATPase, Ca++ transporting, plasma membrane 1	nucleotide binding /// calcium-transporting ATPase activity /// calmodulin binding /// ATP binding /// plasma membrane /// integral to plasma membrane /// ATP biosynthetic process /// transport /// cation transport /// calcium ion transport /// metabolic process /// hydrolase activity /// hydrolase activity, acting on acid anhydrides, catalyzing transmembrane movement of substances /// metal ion …
7968132	-0.50421	0.705046	10.5737	-4.5889	0.00018879	0.00633212	0.651644	NUPL1	nucleoporin like 1	nucleocytoplasmic transporter activity /// protein binding /// nucleus /// nuclear envelope /// nuclear pore /// protein transport /// membrane /// nuclear membrane /// mRNA transport /// transmembrane transport /// intracellular protein transmembrane transport
7908072	-0.505362	0.704484	10.1538	-4.40191	0.000290214	0.00859722	0.231049	LAMC2	laminin, gamma 2	protein binding /// extracellular region /// basement membrane /// laminin-2 complex /// extracellular space /// membrane fraction /// soluble fraction /// cell cortex /// cell adhesion /// heparin binding /// epidermis development /// hemidesmosome assembly /// perinuclear region of cytoplasm /// extracellular region
8065344	-0.508365	0.703019	7.96053	-5.10428	5.83849e-05	0.00269632	1.8027	FOXA2	forkhead box A2	ectoderm formation /// double-stranded DNA binding /// transcription factor activity /// RNA polymerase II transcription factor activity, enhancer binding /// nucleus /// cytoplasm /// regulation of transcription, DNA-dependent /// pattern specification process /// blood coagulation /// anterior/posterior pattern formation /// regulation of gene-specific transcription from RNA polymerase II promo…
8109773	-0.508735	0.702839	8.79238	-5.47801	2.52916e-05	0.00144188	2.62488	WWC1	WW and C2 domain containing 1	transcription coactivator activity /// protein binding /// nucleus /// cytoplasm /// cell migration /// ruffle membrane /// regulation of hippo signaling pathway /// positive regulation of MAPKKK cascade /// perinuclear region of cytoplasm /// protein binding /// cytoplasm
7965022	-0.508904	0.702756	11.3348	-5.12756	5.53977e-05	0.00258344	1.85429	GLIPR1 /// KRR1	GLI pathogenesis-related 1 /// KRR1, small subunit (SSU) processome component, homolog (yeast)	extracellular region /// membrane /// integral to membrane /// RNA binding /// nucleus /// nucleolus /// rRNA processing /// ribonucleoprotein complex /// small nucleolar ribonucleoprotein complex
7981161	-0.510379	0.702038	6.7379	-4.81662	0.000112132	0.00428172	1.16214	C14orf49	chromosome 14 open reading frame 49	actin binding /// protein binding /// nucleus /// nuclear outer membrane /// membrane /// integral to membrane /// SUN-KASH complex /// cytoskeletal anchoring at nuclear membrane
8163116	-0.511192	0.701643	7.46346	-4.77076	0.000124501	0.00465788	1.05953	EPB41L4B	erythrocyte membrane protein band 4.1 like 4B	structural constituent of cytoskeleton /// binding /// cytoplasm /// cytoskeleton /// cytoskeletal protein binding /// extrinsic to membrane /// cytoskeleton
8023656	-0.517524	0.69857	10.8129	-5.32566	3.55102e-05	0.00186496	2.29128	KDSR	3-ketodihydrosphingosine reductase	binding /// extracellular space /// endoplasmic reticulum /// endoplasmic reticulum membrane /// 3-keto-sphinganine metabolic process /// membrane /// integral to membrane /// oxidoreductase activity /// 3-dehydrosphinganine reductase activity /// 3-dehydrosphinganine reductase activity /// oxidation reduction /// endoplasmic reticulum /// 3-dehydrosphinganine reductase activity
7963545	-0.517768	0.698452	7.23071	-4.55373	0.000204668	0.00674735	0.572595	KRT79	keratin 79	structural molecule activity /// keratin filament
7964347	-0.519894	0.697423	11.1202	-5.09808	5.92065e-05	0.00272208	1.78898	TMEM194A	transmembrane protein 194A	molecular_function /// biological_process /// membrane /// integral to membrane
7963313	-0.519973	0.697385	8.92515	-6.04633	7.29837e-06	0.000597086	3.8469	GALNT6	UDP-N-acetyl-alpha-D-galactosamine:polypeptide N-acetylgalactosaminyltransferase 6 (GalNAc-T6)	Golgi membrane /// polypeptide N-acetylgalactosaminyltransferase activity /// sugar binding /// Golgi apparatus /// protein amino acid O-linked glycosylation /// membrane /// integral to membrane /// transferase activity, transferring glycosyl groups /// perinuclear region of cytoplasm /// polypeptide N-acetylgalactosaminyltransferase activity /// calcium ion binding /// Golgi apparatus /// manga…
7992775	-0.520633	0.697066	9.6801	-4.47724	0.000244009	0.00766486	0.400584	PAQR4 /// PKMYT1	progestin and adipoQ receptor family member IV /// protein kinase, membrane associated tyrosine/threonine 1	regulation of cyclin-dependent protein kinase activity /// Golgi membrane /// nucleotide binding /// protein kinase activity /// protein serine/threonine kinase activity /// protein binding /// ATP binding /// membrane fraction /// nucleoplasm /// endoplasmic reticulum /// endoplasmic reticulum membrane /// Golgi apparatus /// protein amino acid phosphorylation /// cell cycle /// mitosis /// regu…
7970924	-0.521677	0.696562	8.08048	-6.03911	7.41261e-06	0.000604447	3.83163	STARD13	StAR-related lipid transfer (START) domain containing 13	GTPase activator activity /// protein binding /// intracellular /// cytoplasm /// mitochondrion /// lipid particle /// signal transduction /// membrane /// mitochondrial membrane
8019885	-0.524467	0.695216	10.5611	-5.28803	3.86291e-05	0.00196973	2.20854	SMCHD1	structural maintenance of chromosomes flexible hinge domain containing 1	protein binding /// ATP binding /// chromosome /// chromosome organization
8134098	-0.524781	0.695065	9.30068	-5.39617	3.03401e-05	0.00164802	2.44595	PFTK1 /// CDK14	PFTAIRE protein kinase 1 /// cyclin-dependent kinase 14	G2/M transition of mitotic cell cycle /// nucleotide binding /// cytoplasmic cyclin-dependent protein kinase holoenzyme complex /// cyclin-dependent protein kinase activity /// protein binding /// ATP binding /// nucleus /// cytoplasm /// cytosol /// plasma membrane /// protein amino acid phosphorylation /// cell cycle /// Wnt receptor signaling pathway /// transferase activity /// cyclin binding…
8020973	-0.52575	0.694598	8.63255	-5.65013	1.72898e-05	0.00108828	2.99887	FHOD3	formin homology 2 domain containing 3	actin binding /// binding /// cytoplasm /// cytoskeleton /// cellular component organization /// actin cytoskeleton organization
8052382	-0.529895	0.692605	8.89625	-4.37822	0.000306496	0.00892079	0.177716	VRK2 /// FANCL	vaccinia related kinase 2 /// Fanconi anemia, complementation group L	nucleotide binding /// protein serine/threonine kinase activity /// protein binding /// ATP binding /// membrane fraction /// endoplasmic reticulum /// protein amino acid phosphorylation /// membrane /// integral to membrane /// transferase activity /// protein amino acid autophosphorylation /// protein binding /// nucleus /// cytoplasm /// DNA repair /// zinc ion binding /// ligase activity /// …
8070912	-0.531218	0.69197	9.40318	-6.1113	6.34737e-06	0.000539154	3.98413	SLC19A1	solute carrier family 19 (folate transporter), member 1	folic acid binding /// membrane fraction /// integral to plasma membrane /// transport /// folic acid transporter activity /// reduced folate carrier activity /// methotrexate transporter activity /// folic acid transport /// membrane
8111457	-0.532163	0.691517	9.8046	-4.4243	0.000275625	0.00829211	0.281459	RAD1	RAD1 homolog (S. pombe)	cell cycle checkpoint /// DNA damage checkpoint /// damaged DNA binding /// protein binding /// nucleus /// DNA replication /// DNA repair /// response to DNA damage stimulus /// meiotic prophase I /// 3'-5' exonuclease activity /// exodeoxyribonuclease III activity /// hydrolase activity /// DNA repair /// 3'-5' exonuclease activity
8071314	-0.532516	0.691348	9.47061	-6.29192	4.31765e-06	0.000414514	4.3628	DGCR8	DiGeorge syndrome critical region gene 8	double-stranded RNA binding /// protein binding /// intracellular /// nucleus /// nucleolus /// cytoplasm /// primary microRNA processing /// metal ion binding /// double-stranded RNA binding
8023377	-0.532713	0.691253	10.5422	-4.38673	0.000300545	0.00880145	0.196872	MEX3C	mex-3 homolog C (C. elegans)	RNA binding /// protein binding /// nucleus /// cytoplasm /// zinc ion binding /// metal ion binding
7938544	-0.535763	0.689794	10.9636	-4.5316	0.000215338	0.00700205	0.522863	TEAD1	TEA domain family member 1 (SV40 transcriptional enhancer factor)	DNA binding /// transcription factor activity /// protein binding /// nucleus /// transcription factor complex /// regulation of transcription, DNA-dependent /// heart development /// transcription activator activity /// positive regulation of transcription from RNA polymerase II promoter
8091327	-0.536758	0.689318	10.9819	-5.06571	6.36973e-05	0.00286612	1.71717	PLSCR1	phospholipid scramblase 1	calcium ion binding /// protein binding /// plasma membrane /// response to virus /// integral to membrane /// phospholipid scrambling /// SH3 domain binding /// phospholipid scramblase activity /// platelet activation
7909164	-0.537839	0.688802	6.73374	-5.81283	1.21056e-05	0.000855098	3.34938	CTSE	cathepsin E	aspartic-type endopeptidase activity /// endosome /// proteolysis /// digestion /// peptidase activity /// antigen processing and presentation of exogenous peptide antigen via MHC class II /// protein homodimerization activity
7926299	-0.538234	0.688613	9.58914	-5.3281	3.5317e-05	0.00186363	2.29665	HSPA14	heat shock 70kDa protein 14	nucleotide binding /// ATP binding
8107706	-0.53831	0.688577	9.94671	-5.98934	8.25272e-06	0.000651163	3.72609	LMNB1	lamin B1	structural molecule activity /// protein binding /// nucleus /// nuclear envelope /// nuclear inner membrane /// lamin filament /// membrane /// nuclear matrix /// structural molecule activity /// lamin filament
8103431	-0.539711	0.687909	9.38952	-4.76163	0.000127123	0.00473998	1.03911	C4orf46	chromosome 4 open reading frame 46	---
8179827	-0.540943	0.687321	12.6208	-4.83915	0.000106519	0.00414341	1.21251	CLIC1	chloride intracellular channel 1	voltage-gated ion channel activity /// voltage-gated chloride channel activity /// chloride channel activity /// protein binding /// membrane fraction /// soluble fraction /// nucleus /// nuclear envelope /// cytoplasm /// plasma membrane /// brush border /// transport /// ion transport /// chloride transport /// signal transduction /// integral to membrane /// nuclear membrane /// chloride chann…
8125059	-0.541247	0.687177	12.4898	-4.99177	7.53005e-05	0.00325963	1.55286	CLIC1	chloride intracellular channel 1	voltage-gated ion channel activity /// voltage-gated chloride channel activity /// chloride channel activity /// protein binding /// membrane fraction /// soluble fraction /// nucleus /// nuclear envelope /// cytoplasm /// plasma membrane /// brush border /// transport /// ion transport /// chloride transport /// signal transduction /// integral to membrane /// nuclear membrane /// chloride chann…
8045697	-0.541901	0.686865	10.4877	-4.73946	0.000133729	0.00493358	0.989442	RIF1	RAP1 interacting factor homolog (yeast)	chromosome, telomeric region /// binding /// nucleus /// chromosome /// cytoplasm /// spindle /// cytoskeleton /// response to DNA damage stimulus /// cell cycle /// female pronucleus /// male pronucleus /// stem cell maintenance
8015223	-0.544427	0.685664	8.74083	-4.32165	0.0003492	0.00985721	0.0503208	KRTAP4-7 /// KRTAP4-8 /// KRTAP4-11 /// KRTAP4-12 /// KRTAP4-5 /// KRTAP4-1 /// KRTAP4-2	keratin associated protein 4-7 /// keratin associated protein 4-8 /// keratin associated protein 4-11 /// keratin associated protein 4-12 /// keratin associated protein 4-5 /// keratin associated protein 4-1 /// keratin associated protein 4-2	keratin filament
8019565	-0.544427	0.685664	8.74083	-4.32165	0.0003492	0.00985721	0.0503208	KRTAP4-8 /// KRTAP4-11 /// KRTAP4-12 /// KRTAP4-5 /// KRTAP4-2	keratin associated protein 4-8 /// keratin associated protein 4-11 /// keratin associated protein 4-12 /// keratin associated protein 4-5 /// keratin associated protein 4-2	keratin filament
7992293	-0.544915	0.685432	10.5939	-5.39322	3.05398e-05	0.00165616	2.43951	TMEM204	transmembrane protein 204	plasma membrane /// adherens junction /// response to stress /// integral to membrane /// cell junction
8083214	-0.550218	0.682917	8.6039	-5.34747	3.38212e-05	0.00179323	2.33918	CHST2	carbohydrate (N-acetylglucosamine-6-O) sulfotransferase 2	N-acetylglucosamine 6-O-sulfotransferase activity /// Golgi apparatus /// trans-Golgi network /// carbohydrate metabolic process /// N-acetylglucosamine metabolic process /// sulfur metabolic process /// inflammatory response /// multicellular organismal development /// sulfotransferase activity /// membrane /// integral to membrane /// transferase activity /// intrinsic to Golgi membrane /// inf…
7923233	-0.552824	0.681685	7.68215	-4.58879	0.00018884	0.00633212	0.651385	KIF21B	kinesin family member 21B	nucleotide binding /// microtubule motor activity /// ATP binding /// cytoplasm /// microtubule /// microtubule-based movement
7951497	-0.553188	0.681512	9.97652	-4.82247	0.000110645	0.00424581	1.17523	NPAT	nuclear protein, ataxia-telangiectasia locus	regulation of transcription involved in G1/S-phase of mitotic cell cycle /// transcription factor activity /// transcription coactivator activity /// transcription coactivator activity /// transcription corepressor activity /// protein binding /// nucleus /// cell cycle /// protein C-terminus binding /// regulation of gene expression /// Cajal body /// transcription activator activity /// nuclear…
8178598	-0.554121	0.681072	12.6197	-4.93252	8.61344e-05	0.00356791	1.42092	CLIC1	chloride intracellular channel 1	voltage-gated ion channel activity /// voltage-gated chloride channel activity /// chloride channel activity /// protein binding /// membrane fraction /// soluble fraction /// nucleus /// nuclear envelope /// cytoplasm /// plasma membrane /// brush border /// transport /// ion transport /// chloride transport /// signal transduction /// integral to membrane /// nuclear membrane /// chloride chann…
8062794	-0.554739	0.68078	7.35715	-4.72163	0.000139293	0.00507589	0.949489	---	---	---
8036045	-0.555346	0.680494	6.30463	-4.3292	0.000343168	0.00975787	0.0673341	ZNF792	zinc finger protein 792	DNA binding /// intracellular /// nucleus /// regulation of transcription, DNA-dependent /// zinc ion binding /// metal ion binding
8027778	-0.556337	0.680027	11.6449	-4.73173	0.000136113	0.00500402	0.972119	FXYD5 /// LOC100127972	FXYD domain containing ion transport regulator 5 /// hypothetical LOC100127972	actin binding /// ion channel activity /// ion transport /// membrane /// integral to membrane /// microvillus assembly /// cadherin binding /// negative regulation of calcium-dependent cell-cell adhesion
7997839	-0.556981	0.679723	8.54161	-4.61078	0.000179546	0.00614424	0.700798	CDT1	chromatin licensing and DNA replication factor 1	DNA replication checkpoint /// DNA binding /// protein binding /// nucleus /// nucleoplasm /// DNA replication /// cell cycle /// regulation of S phase of mitotic cell cycle /// regulation of DNA-dependent DNA replication initiation /// regulation of DNA replication initiation
7913644	-0.559081	0.678734	7.21905	-5.58688	1.98758e-05	0.00120328	2.86181	E2F2	E2F transcription factor 2	DNA binding /// transcription factor activity /// RNA polymerase II transcription factor activity /// protein binding /// nucleus /// nucleoplasm /// transcription factor complex /// regulation of transcription, DNA-dependent /// transcription initiation from RNA polymerase II promoter /// apoptosis /// transcription factor binding /// regulation of cell cycle /// transcription factor activity
8130916	-0.560924	0.677868	10.0354	-4.43654	0.00026797	0.00812622	0.308994	C6orf120 /// PHF10 /// PHF10	chromosome 6 open reading frame 120 /// PHD finger protein 10 /// PHD finger protein 10	protein binding /// nucleus /// nervous system development /// zinc ion binding /// regulation of transcription /// metal ion binding /// npBAF complex /// extracellular region
7907601	-0.565568	0.675689	6.30359	-5.34881	3.37203e-05	0.00179072	2.34212	FAM5B	family with sequence similarity 5, member B	extracellular region /// cytoplasm /// nervous system development /// negative regulation of cell cycle
8064978	-0.566396	0.675301	8.92063	-5.63447	1.78963e-05	0.0011159	2.96498	JAG1	jagged 1 (Alagille syndrome)	angiogenesis /// cell fate determination /// morphogenesis of an epithelial sheet /// Notch binding /// structural molecule activity /// calcium ion binding /// protein binding /// extracellular region /// plasma membrane /// integral to plasma membrane /// cell communication /// Notch signaling pathway /// multicellular organismal development /// nervous system development /// growth factor acti…
8021418	-0.568329	0.674397	9.00204	-5.3586	3.29909e-05	0.00176608	2.36361	MALT1	mucosa associated lymphoid tissue lymphoma translocation gene 1	B-1 B cell differentiation /// response to molecule of bacterial origin /// positive regulation of T cell cytokine production /// cysteine-type endopeptidase activity /// ubiquitin-protein ligase activity /// signal transducer activity /// protein binding /// nucleus /// cytoplasm /// cytosol /// proteolysis /// anti-apoptosis /// defense response /// activation of NF-kappaB-inducing kinase activ…
8153223	-0.573382	0.67204	10.3732	-5.04482	6.67777e-05	0.00297259	1.6708	PTK2	PTK2 protein tyrosine kinase 2	nucleotide binding /// microtubule cytoskeleton organization /// angiogenesis /// blood vessel development /// vasculogenesis /// neuron migration /// protein tyrosine kinase activity /// non-membrane spanning protein tyrosine kinase activity /// signal transducer activity /// protein binding /// ATP binding /// cytoplasm /// cytosol /// cytoskeleton /// plasma membrane /// focal adhesion /// pro…
8045768	-0.57377	0.671859	9.12315	-4.42422	0.000275682	0.00829211	0.281259	ARL6IP6	ADP-ribosylation-like factor 6 interacting protein 6	protein binding /// membrane /// integral to membrane
8084206	-0.574002	0.671751	10.4773	-4.61556	0.000177589	0.00608979	0.711529	B3GNT5	UDP-GlcNAc:betaGal beta-1,3-N-acetylglucosaminyltransferase 5	Golgi membrane /// intracellular /// Golgi apparatus /// protein amino acid glycosylation /// multicellular organismal development /// central nervous system development /// galactosyltransferase activity /// beta-galactosyl-N-acetylglucosaminylgalactosylglucosyl-ceramide beta-1,3-acetylglucosaminyltransferase activity /// lipopolysaccharide N-acetylglucosaminyltransferase activity /// glycolipid…
8047243	-0.57496	0.671305	8.23995	-5.89761	1.00661e-05	0.000744824	3.5308	MARS2	methionyl-tRNA synthetase 2, mitochondrial	nucleotide binding /// methionine-tRNA ligase activity /// methionine-tRNA ligase activity /// ATP binding /// cytoplasm /// mitochondrion /// mitochondrial matrix /// mitochondrial matrix /// methionyl-tRNA aminoacylation /// ligase activity
7897469	-0.576269	0.670696	8.88016	-4.45528	0.000256656	0.00790183	0.351169	TMEM201	transmembrane protein 201	membrane /// integral to membrane
8138489	-0.576658	0.670515	9.28132	-4.57338	0.000195638	0.00651416	0.61676	CDCA7L	cell division cycle associated 7-like	protein binding /// nucleus /// cytoplasm /// positive regulation of cell proliferation /// regulation of transcription /// nucleus
8096489	-0.578356	0.669727	9.85442	-4.95962	8.09949e-05	0.0034268	1.4813	PDLIM5	PDZ and LIM domain 5	actin binding /// protein kinase C binding /// membrane fraction /// cytosol /// zinc ion binding /// actin cytoskeleton /// Z disc /// actinin binding /// metal ion binding /// protein N-terminus binding /// protein binding
7985829	-0.579676	0.669114	10.5627	-6.25184	4.70139e-06	0.000437269	4.27914	FANCI /// POLG	Fanconi anemia, complementation group I /// polymerase (DNA directed), gamma	protease binding /// DNA binding /// DNA-directed DNA polymerase activity /// exonuclease activity /// protein binding /// mitochondrion /// mitochondrial inner membrane /// gamma DNA polymerase complex /// DNA metabolic process /// DNA-dependent DNA replication /// mitochondrial DNA replication /// base-excision repair, gap-filling /// aging /// transferase activity /// nucleotidyltransferase ac…
7989023	-0.580575	0.668697	9.34331	-5.40328	2.9863e-05	0.00163276	2.46154	RAB27A	RAB27A, member RAS oncogene family	nucleotide binding /// photoreceptor outer segment /// GTPase activity /// protein binding /// GTP binding /// lysosome /// late endosome /// Golgi apparatus /// protein targeting /// exocytosis /// small GTPase mediated signal transduction /// blood coagulation /// protein transport /// membrane /// apical plasma membrane /// melanocyte differentiation /// dendrite /// secretory granule membrane…
8060205	-0.581139	0.668436	8.09281	-5.07325	6.26219e-05	0.0028292	1.7339	PASK	PAS domain containing serine/threonine kinase	nucleotide binding /// protein serine/threonine kinase activity /// signal transducer activity /// protein binding /// ATP binding /// cytoplasm /// Golgi apparatus /// regulation of transcription, DNA-dependent /// protein amino acid phosphorylation /// signal transduction /// transferase activity /// identical protein binding /// cytoplasm
7967021	-0.581208	0.668404	8.76376	-4.75741	0.000128354	0.00478055	1.02965	PXN	paxillin	protein binding /// cytoplasm /// cytoskeleton /// microtubule associated complex /// plasma membrane /// plasma membrane /// focal adhesion /// muscle contraction /// cell adhesion /// cell-matrix adhesion /// signal transduction /// signal complex assembly /// zinc ion binding /// vinculin binding /// lamellipodium /// cell junction /// cellular response to reactive oxygen species /// metal ion…
8118945	-0.585667	0.666341	9.57512	-5.03122	6.88652e-05	0.00303807	1.64057	PPARD	peroxisome proliferator-activated receptor delta	negative regulation of transcription from RNA polymerase II promoter /// placenta development /// DNA binding /// transcription factor activity /// transcription factor activity /// steroid hormone receptor activity /// ligand-dependent nuclear receptor activity /// fatty acid binding /// protein binding /// nucleus /// glucose metabolic process /// generation of precursor metabolites and energy …
7923426	-0.587061	0.665698	11.3523	-5.22455	4.45369e-05	0.00221005	2.06868	UBE2T	ubiquitin-conjugating enzyme E2T (putative)	nucleotide binding /// ubiquitin-protein ligase activity /// ATP binding /// ligase activity /// post-translational protein modification /// regulation of protein metabolic process /// modification-dependent protein catabolic process
8134904	-0.587151	0.665656	9.92262	-4.32175	0.000349119	0.00985721	0.0505478	POP7	processing of precursor 7, ribonuclease P/MRP subunit (S. cerevisiae)	ribonuclease P activity /// protein binding /// nucleus /// nucleolar ribonuclease P complex /// nucleolus /// tRNA processing /// hydrolase activity /// nucleic acid binding /// ribonuclease P activity /// nucleus
8160284	-0.587364	0.665558	10.2268	-4.40698	0.000286844	0.0085201	0.242466	HAUS6	HAUS augmin-like complex, subunit 6	molecular_function /// cytoplasm /// microtubule organizing center /// spindle /// cytoskeleton /// microtubule /// cell cycle /// mitosis /// spindle assembly /// centrosome organization /// cell division /// HAUS complex /// centrosome
7920291	-0.590173	0.664263	12.2207	-9.05774	2.02915e-08	8.0434e-06	9.58621	S100A16	S100 calcium binding protein A16	calcium ion binding /// nucleus /// nucleolus /// cytoplasm /// protein homodimerization activity /// response to calcium ion
8019570	-0.591927	0.663456	6.54983	-4.93464	8.57206e-05	0.0035589	1.42564	KRTAP4-7 /// KRTAP4-8 /// KRTAP4-11	keratin associated protein 4-7 /// keratin associated protein 4-8 /// keratin associated protein 4-11	keratin filament
7947147	-0.594314	0.66236	9.31585	-4.37711	0.000307279	0.00893579	0.175221	SVIP	small VCP/p97-interacting protein	Golgi membrane /// endoplasmic reticulum /// Golgi apparatus /// plasma membrane /// smooth endoplasmic reticulum membrane
8106210	-0.594527	0.662261	9.08352	-4.74724	0.000131373	0.00486577	1.00686	RGNEF /// RGNEF	Rho-guanine nucleotide exchange factor /// 190 kDa guanine nucleotide exchange factor	RNA binding /// guanyl-nucleotide exchange factor activity /// Rho guanyl-nucleotide exchange factor activity /// intracellular /// cytoplasm /// plasma membrane /// cell differentiation /// regulation of Rho protein signal transduction /// metal ion binding /// intracellular signaling cascade /// zinc ion binding /// diacylglycerol binding
8059905	-0.594683	0.66219	11.0309	-5.31884	3.60559e-05	0.0018788	2.27629	COL6A3	collagen, type VI, alpha 3	serine-type endopeptidase inhibitor activity /// protein binding /// extracellular region /// proteinaceous extracellular matrix /// collagen type VI /// extracellular space /// cell adhesion /// muscle organ development /// peptidase inhibitor activity /// sarcolemma
8153201	-0.595973	0.661598	9.57787	-5.57592	2.03629e-05	0.00122387	2.83801	EIF2C2	eukaryotic translation initiation factor 2C, 2	RNA 7-methylguanosine cap binding /// cytoplasmic mRNA processing body /// translation initiation factor activity /// endonuclease activity /// protein binding /// nucleus /// cytoplasm /// mRNA cap binding complex /// translation /// regulation of translation /// RNA-induced silencing complex /// hydrolase activity /// gene silencing by RNA /// pre-microRNA processing /// micro-ribonucleoprotein…
8027566	-0.596244	0.661474	9.41116	-4.92525	8.75685e-05	0.00361251	1.40471	CEBPG	CCAAT/enhancer binding protein (C/EBP), gamma	liver development /// DNA binding /// double-stranded DNA binding /// transcription factor activity /// protein binding /// nucleus /// nucleus /// nucleolus /// regulation of transcription from RNA polymerase II promoter /// immune response /// transcription factor binding /// mRNA metabolic process /// B cell differentiation /// natural killer cell mediated cytotoxicity /// enucleate erythrocyt…
8170971	-0.597245	0.661015	10.8314	-4.46888	0.000248745	0.00780347	0.381785	DKC1	dyskeratosis congenita 1, dyskerin	pseudouridine synthesis /// telomerase activity /// RNA binding /// protein binding /// nucleus /// nucleoplasm /// telomerase holoenzyme complex /// nucleolus /// rRNA processing /// RNA processing /// telomere maintenance via telomerase /// cell proliferation /// pseudouridine synthase activity /// Cajal body /// isomerase activity /// RNA binding /// nucleus /// nucleoplasm /// nucleolus /// r…
7896692	-0.597622	0.660842	8.73513	-5.60164	1.92392e-05	0.00118022	2.89382	---	---	---
7941694	-0.598278	0.660542	10.8863	-5.07854	6.18777e-05	0.00281084	1.74564	RBM4 /// RBM14	RNA binding motif protein 4 /// RNA binding motif protein 14	nucleotide binding /// RNA binding /// nucleus /// nucleolus /// cytoplasm /// RNA processing /// mRNA processing /// zinc ion binding /// RNA splicing /// metal ion binding /// RNA binding /// nucleus /// transcription factor complex /// nucleolus /// DNA replication /// DNA repair /// DNA recombination /// response to hormone stimulus /// RNA polymerase II transcription mediator activity /// hi…
8031807	-0.598296	0.660534	8.33871	-5.17832	4.94133e-05	0.00237762	1.9666	ZNF551	zinc finger protein 551	DNA binding /// intracellular /// nucleus /// regulation of transcription, DNA-dependent /// zinc ion binding /// metal ion binding
8129618	-0.600864	0.659359	6.00414	-5.47376	2.55315e-05	0.00144579	2.6156	VNN1	vanin 1	acute inflammatory response /// chronic inflammatory response /// plasma membrane /// nitrogen compound metabolic process /// anti-apoptosis /// cellular component movement /// inflammatory response /// response to oxidative stress /// pantothenate metabolic process /// integral to membrane /// cell-cell adhesion /// pantetheine hydrolase activity /// anchored to membrane /// positive regulation …
8015218	-0.602723	0.65851	9.27316	-4.42071	0.000277918	0.00833677	0.273363	KRTAP4-7 /// KRTAP4-8 /// KRTAP4-11 /// KRTAP4-6 /// KRTAP4-9	keratin associated protein 4-7 /// keratin associated protein 4-8 /// keratin associated protein 4-11 /// keratin associated protein 4-6 /// keratin associated protein 4-9	keratin filament
8090772	-0.603528	0.658142	11.38	-6.00169	8.03558e-06	0.000643175	3.7523	TOPBP1	topoisomerase (DNA) II binding protein 1	condensed nuclear chromosome /// spindle pole /// male germ cell nucleus /// DNA binding /// protein binding /// intracellular /// nucleus /// cytoplasm /// microtubule organizing center /// cytoskeleton /// DNA metabolic process /// DNA repair /// response to DNA damage stimulus /// protein C-terminus binding /// response to ionizing radiation /// PML body /// nucleus
8093130	-0.603912	0.657967	9.40712	-4.55189	0.000205533	0.00676917	0.568466	RNF168	ring finger protein 168	ubiquitin ligase complex /// chromatin binding /// ubiquitin-protein ligase activity /// protein binding /// nucleus /// chromosome /// double-strand break repair /// zinc ion binding /// response to ionizing radiation /// chromatin modification /// ligase activity /// histone binding /// ubiquitin binding /// positive regulation of DNA repair /// metal ion binding /// histone H2A K63-linked ubiq…
8041763	-0.604895	0.657519	8.55443	-5.31805	3.61196e-05	0.00187918	2.27456	PRKCE	protein kinase C, epsilon	nucleotide binding /// protein kinase C activity /// calcium-independent protein kinase C activity /// signal transducer activity /// protein binding /// ATP binding /// nucleus /// cytoplasm /// plasma membrane /// protein amino acid phosphorylation /// induction of apoptosis /// signal transduction /// transferase activity /// enzyme binding /// metal ion binding /// regulation of peptidyl-tyro…
8141419	-0.605289	0.65734	8.30185	-5.98735	8.28823e-06	0.000651225	3.72187	MIR25	microRNA 25	---
7987772	-0.605813	0.657101	9.86924	-4.46767	0.00024944	0.00780347	0.379056	EHD4	EH-domain containing 4	nucleotide binding /// nucleic acid binding /// GTPase activity /// calcium ion binding /// protein binding /// ATP binding /// GTP binding /// nucleus /// endosome /// endoplasmic reticulum /// pinocytosis /// membrane /// regulation of endocytosis /// early endosome membrane /// recycling endosome membrane
8096116	-0.606673	0.656709	10.8744	-5.48828	2.47222e-05	0.00141927	2.64727	AGPAT9	1-acylglycerol-3-phosphate O-acyltransferase 9	glycerol-3-phosphate O-acyltransferase activity /// endoplasmic reticulum /// endoplasmic reticulum membrane /// metabolic process /// acyltransferase activity /// phospholipid biosynthetic process /// membrane /// integral to membrane /// transferase activity /// triglyceride biosynthetic process /// regulation of TOR signaling pathway
8007363	-0.606994	0.656563	8.55522	-4.5368	0.000212782	0.00693926	0.534548	WNK4	WNK lysine deficient protein kinase 4	nucleotide binding /// protein serine/threonine kinase activity /// protein binding /// ATP binding /// cytoplasm /// tight junction /// protein amino acid phosphorylation /// ion transport /// chloride transport /// intracellular protein kinase cascade /// protein localization /// transferase activity /// cell junction /// regulation of cellular process /// protein kinase cascade
7972180	-0.607093	0.656518	8.99851	-4.6334	0.000170473	0.00591274	0.75158	RNF219	ring finger protein 219	protein binding /// zinc ion binding /// metal ion binding
8092520	-0.61095	0.654765	8.27291	-5.15936	5.15682e-05	0.00244581	1.92466	C3orf70	chromosome 3 open reading frame 70	---
8040223	-0.612035	0.654273	10.7402	-5.6212	1.84271e-05	0.00114258	2.93623	RRM2	ribonucleotide reductase M2	ribonucleoside-diphosphate reductase activity /// protein binding /// cytoplasm /// cytosol /// DNA replication /// deoxyribonucleoside diphosphate metabolic process /// deoxyribonucleotide biosynthetic process /// oxidoreductase activity /// class I ribonucleotide reductase activity /// transition metal ion binding /// protein oligomerization /// oxidation reduction /// iron ion binding /// deox…
8146357	-0.612068	0.654258	10.9239	-6.15597	5.76821e-06	0.000506765	4.07817	MCM4	minichromosome maintenance complex component 4	nucleotide binding /// DNA binding /// DNA helicase activity /// single-stranded DNA binding /// protein binding /// ATP binding /// nucleus /// nucleus /// nucleoplasm /// nucleolus /// DNA replication /// DNA replication /// DNA unwinding involved in replication /// DNA-dependent DNA replication initiation /// nucleoside-triphosphatase activity /// regulation of transcription /// DNA unwinding …
7936408	-0.612408	0.654104	8.71455	-4.45909	0.000254414	0.00787289	0.359747	DCLRE1A	DNA cross-link repair 1A (PSO2 homolog, S. cerevisiae)	nucleus /// nucleotide-excision repair /// cell cycle /// mitosis /// hydrolase activity /// cell division /// response to DNA damage stimulus
7967002	-0.615069	0.652899	10.3642	-5.65416	1.71374e-05	0.00108073	3.00758	PXN	paxillin	protein binding /// cytoplasm /// cytoskeleton /// microtubule associated complex /// plasma membrane /// plasma membrane /// focal adhesion /// muscle contraction /// cell adhesion /// cell-matrix adhesion /// signal transduction /// signal complex assembly /// zinc ion binding /// vinculin binding /// lamellipodium /// cell junction /// cellular response to reactive oxygen species /// metal ion…
8027402	-0.616186	0.652393	9.03879	-4.46846	0.000248986	0.00780347	0.380837	CCNE1	cyclin E1	G1/S transition of mitotic cell cycle /// antral ovarian follicle growth /// liver development /// transcription coactivator activity /// protein binding /// nucleus /// nucleus /// nucleoplasm /// cytoplasm /// centrosome /// cytosol /// cell cycle /// response to organic nitrogen /// response to purine /// androgen receptor signaling pathway /// organ regeneration /// cellular response to nutri…
8089372	-0.616722	0.652151	10.6968	-4.39433	0.000295329	0.00869457	0.213979	KIAA1524	KIAA1524	protein binding /// cytoplasm /// membrane /// integral to membrane /// cytoplasm
8089082	-0.617749	0.651687	12.9534	-6.49744	2.79941e-06	0.000306618	4.78836	DCBLD2	discoidin, CUB and LCCL domain containing 2	integral to plasma membrane /// cell adhesion /// cell surface /// membrane /// negative regulation of cell growth /// intracellular receptor mediated signaling pathway /// wound healing /// protein binding /// integral to plasma membrane /// cell surface /// negative regulation of cell growth /// intracellular receptor-mediated signaling pathway /// wound healing
7922391	-0.618384	0.6514	8.62875	-5.62918	1.8106e-05	0.00112477	2.95352	CENPL	centromere protein L	chromosome, centromeric region /// nucleus /// chromosome
7960283	-0.618952	0.651144	7.70289	-5.499	2.41412e-05	0.00139456	2.67065	CACNA2D4	calcium channel, voltage-dependent, alpha 2/delta subunit 4	voltage-gated ion channel activity /// calcium channel activity /// ion transport /// calcium ion transport /// visual perception /// membrane /// integral to membrane /// metal ion binding /// response to stimulus /// calcium ion binding
8085665	-0.62357	0.649063	9.2498	-5.20881	4.61397e-05	0.00225597	2.03394	RFTN1	raftlin, lipid raft linker 1	plasma membrane
7952830	-0.624405	0.648687	10.7178	-5.58023	2.01702e-05	0.00121668	2.84736	NCAPD3	non-SMC condensin II complex, subunit D3	nuclear condensin complex /// binding /// nucleus /// cell cycle /// mitosis /// mitotic chromosome condensation /// cell division
8165622	-0.627911	0.647113	9.20026	-4.46223	0.00025258	0.00783067	0.366823	ZMYND19	zinc finger, MYND-type containing 19	cytoplasm /// plasma membrane /// zinc ion binding /// synaptosome /// metal ion binding
7950578	-0.628598	0.646805	10.5291	-6.50612	2.74896e-06	0.000304093	4.80622	PAK1	p21 protein (Cdc42/Rac)-activated kinase 1	MAPKKK cascade /// nucleotide binding /// protein kinase activity /// protein serine/threonine kinase activity /// protein binding /// collagen binding /// ATP binding /// cytoplasm /// Golgi apparatus /// cytosol /// plasma membrane /// focal adhesion /// protein amino acid phosphorylation /// apoptosis /// ER-nucleus signaling pathway /// cytoskeleton organization /// transferase activity /// c…
8155554	-0.630583	0.645915	7.25838	-4.90454	9.17899e-05	0.00374092	1.35851	AQP7 /// AQP7P2 /// AQP7P1	aquaporin 7 /// aquaporin 7 pseudogene 2 /// aquaporin 7 pseudogene 1	transporter activity /// cytoplasm /// plasma membrane /// integral to plasma membrane /// cell-cell junction /// generation of precursor metabolites and energy /// water transport /// spermatogenesis /// excretion /// water channel activity /// glycerol channel activity /// urea channel activity /// glycerol transport /// urea transport /// ribonucleoprotein complex /// brush border membrane ///…
8144786	-0.630666	0.645878	10.2602	-5.60046	1.92892e-05	0.00118065	2.89127	SLC7A2	solute carrier family 7 (cationic amino acid transporter, y+ system), member 2	membrane fraction /// integral to plasma membrane /// cellular amino acid metabolic process /// transport /// amino acid transport /// basic amino acid transmembrane transporter activity /// membrane /// transmembrane transport /// amino acid transport
8055426	-0.636648	0.643205	10.0511	-5.26852	4.03541e-05	0.00204516	2.1656	MCM6	minichromosome maintenance complex component 6	nucleotide binding /// DNA binding /// DNA helicase activity /// single-stranded DNA binding /// protein binding /// ATP binding /// nucleus /// nucleus /// nucleoplasm /// DNA replication /// DNA replication /// DNA unwinding involved in replication /// DNA-dependent DNA replication initiation /// cell cycle /// identical protein binding /// regulation of transcription /// DNA unwinding during r…
8166525	-0.63787	0.642661	9.54748	-4.67596	0.000154636	0.00552458	0.847092	POLA1	polymerase (DNA directed), alpha 1, catalytic subunit	S phase of mitotic cell cycle /// nucleotide binding /// DNA synthesis involved in DNA repair /// DNA synthesis involved in DNA repair /// chromatin /// nucleoside binding /// DNA binding /// DNA binding /// chromatin binding /// DNA-directed DNA polymerase activity /// DNA-directed DNA polymerase activity /// DNA primase activity /// protein binding /// nucleus /// nuclear envelope /// nucleopla…
8102440	-0.640736	0.641386	8.1724	-4.93024	8.65814e-05	0.00358124	1.41584	ARSJ	arylsulfatase family, member J	arylsulfatase activity /// extracellular region /// metabolic process /// hydrolase activity /// metal ion binding /// calcium ion binding
8019699	-0.648555	0.637919	7.18149	-5.09582	5.95094e-05	0.00272681	1.78397	KRTAP4-7 /// KRTAP4-8 /// KRTAP4-11	keratin associated protein 4-7 /// keratin associated protein 4-8 /// keratin associated protein 4-11	keratin filament
8149811	-0.650098	0.637237	8.77055	-6.07161	6.91205e-06	0.000572514	3.90036	NKX3-1	NK3 homeobox 1	somitogenesis /// transcription factor activity /// protein binding /// nucleus /// regulation of transcription, DNA-dependent /// multicellular organismal development /// salivary gland development /// heart development /// transcription factor binding /// transcription activator activity /// prostate gland development /// sequence-specific DNA binding /// branching morphogenesis of a tube /// n…
7911017	-0.651963	0.636414	9.67455	-6.79568	1.50752e-06	0.000195314	5.39565	SDCCAG8	serologically defined colon cancer antigen 8	cytoplasm /// centrosome /// cytosol /// cytoskeleton
8020493	-0.652308	0.636262	5.44623	-4.8779	9.75229e-05	0.00389823	1.29907	---	---	---
8015230	-0.659396	0.633143	9.07839	-4.95876	8.11542e-05	0.00342871	1.47937	KRTAP4-7 /// KRTAP4-8 /// KRTAP4-11 /// KRTAP4-12 /// KRTAP4-6	keratin associated protein 4-7 /// keratin associated protein 4-8 /// keratin associated protein 4-11 /// keratin associated protein 4-12 /// keratin associated protein 4-6	keratin filament
7967876	-0.660576	0.632626	9.86549	-4.50472	0.000229063	0.00731267	0.462407	RP11-408E5.4 /// LOC645739	hCG1646718 /// hCG1646718	---
8134030	-0.661018	0.632432	9.0739	-4.51291	0.00022479	0.00721778	0.480829	STEAP1	six transmembrane epithelial antigen of the prostate 1	transporter activity /// iron ion binding /// endosome /// plasma membrane /// integral to plasma membrane /// cell-cell junction /// ion transport /// iron ion transport /// electron carrier activity /// endosome membrane /// channel activity /// oxidoreductase activity /// electron transport chain /// metal ion binding /// FAD binding /// copper ion binding
8023598	-0.663046	0.631544	7.18354	-6.40864	3.37349e-06	0.000344562	4.60519	RNF152	ring finger protein 152	protein binding /// zinc ion binding /// metal ion binding
7910416	-0.663871	0.631182	9.37929	-6.20551	5.18898e-06	0.000471282	4.18217	URB2	URB2 ribosome biogenesis 2 homolog (S. cerevisiae)	nucleus /// nucleolus /// nucleus /// nucleolus
8064485	-0.664536	0.630892	6.39214	-5.90926	9.81492e-06	0.000732752	3.55564	SIRPG	signal-regulatory protein gamma	protein binding /// plasma membrane /// cell adhesion /// cell-cell signaling /// positive regulation of cell proliferation /// negative regulation of cell proliferation /// membrane /// integral to membrane /// positive regulation of cell-cell adhesion /// positive regulation of T cell activation /// intracellular signaling cascade
8089875	-0.665626	0.630415	9.17143	-5.20422	4.66182e-05	0.00227498	2.02381	POLQ	polymerase (DNA directed), theta	nucleotide binding /// damaged DNA binding /// DNA-directed DNA polymerase activity /// ATP binding /// nucleoplasm /// DNA replication /// DNA repair /// transferase activity /// nucleotidyltransferase activity /// DNA-directed DNA polymerase activity /// DNA repair /// response to DNA damage stimulus
7994280	-0.667652	0.629531	9.00791	-5.40188	2.99567e-05	0.00163519	2.45846	IL4R	interleukin 4 receptor	receptor activity /// interleukin-4 receptor activity /// receptor signaling protein activity /// protein binding /// extracellular region /// plasma membrane /// integral to plasma membrane /// immune response /// signal transduction /// insulin receptor substrate binding /// negative regulation of T-helper 1 cell differentiation /// positive regulation of T-helper 2 cell differentiation /// imm…
8051573	-0.668042	0.62936	11.1022	-4.44384	0.0002635	0.00804931	0.325439	CDC42EP3	CDC42 effector protein (Rho GTPase binding) 3	protein binding /// cytoskeletal regulatory protein binding /// cytoplasm /// signal transduction /// regulation of cell shape /// endomembrane system /// actin cytoskeleton /// membrane
7902957	-0.669471	0.628737	8.28477	-5.10446	5.83602e-05	0.00269632	1.80312	EPHX4	epoxide hydrolase 4	membrane /// integral to membrane /// hydrolase activity
8080911	-0.670592	0.628249	7.25174	-4.49578	0.00023382	0.00743602	0.442301	KBTBD8	kelch repeat and BTB (POZ) domain containing 8	protein binding
7969574	-0.671512	0.627848	12.0921	-4.92124	8.83703e-05	0.00363268	1.39577	KRT18 /// MIR622	keratin 18 /// microRNA 622	structural molecule activity /// protein binding /// cytoplasm /// microtubule organizing center /// intermediate filament /// cell cycle /// anatomical structure morphogenesis /// centriolar satellite /// Golgi to plasma membrane CFTR protein transport /// negative regulation of apoptosis /// interspecies interaction between organisms /// keratin filament /// perinuclear region of cytoplasm /// …
8110106	-0.674342	0.626618	7.41781	-5.82679	1.17427e-05	0.000835368	3.37931	HRH2	histamine receptor H2	receptor activity /// G-protein coupled receptor activity /// histamine receptor activity /// plasma membrane /// integral to plasma membrane /// immune response /// signal transduction /// G-protein coupled receptor protein signaling pathway /// G-protein signaling, coupled to cyclic nucleotide second messenger /// histamine receptor activity
7984743	-0.67549	0.62612	9.36787	-4.56679	0.000198618	0.00658049	0.601962	CD276	CD276 molecule	receptor binding /// protein binding /// immune response /// cell proliferation /// external side of plasma membrane /// membrane /// integral to membrane /// positive regulation of bone mineralization /// positive regulation of T cell proliferation /// T cell activation /// negative regulation of T cell proliferation /// negative regulation of interferon-gamma biosynthetic process /// positive r…
8023646	-0.677294	0.625337	7.95379	-6.44205	3.14449e-06	0.00033029	4.67422	BCL2	B-cell CLL/lymphoma 2	G1/S transition of mitotic cell cycle /// protein phosphatase type 2A complex /// protein polyubiquitination /// cell morphogenesis /// ovarian follicle development /// ureteric bud development /// branching involved in ureteric bud morphogenesis /// behavioral fear response /// response to hypoxia /// B cell homeostasis /// release of cytochrome c from mitochondria /// release of cytochrome c fr…
8066136	-0.682907	0.622909	9.51669	-6.28232	4.40658e-06	0.000418022	4.34277	RBL1	retinoblastoma-like 1 (p107)	negative regulation of transcription from RNA polymerase II promoter /// protein binding /// nucleus /// transcription factor complex /// cell cycle /// transcription factor binding /// chromatin modification /// regulation of lipid kinase activity /// interspecies interaction between organisms /// regulation of transcription
7894897	-0.684468	0.622235	6.246	-4.3827	0.000303349	0.00887575	0.1878	---	---	---
8007115	-0.684539	0.622205	9.29819	-4.59374	0.000186705	0.00629771	0.662513	KRTAP4-7 /// KRTAP4-8 /// KRTAP4-11 /// KRTAP4-9	keratin associated protein 4-7 /// keratin associated protein 4-8 /// keratin associated protein 4-11 /// keratin associated protein 4-9	keratin filament
7924166	-0.685105	0.621961	8.7245	-7.39626	4.49468e-07	8.13366e-05	6.58022	BATF3	basic leucine zipper transcription factor, ATF-like 3	transcription factor activity /// transcription corepressor activity /// nucleus /// regulation of transcription, DNA-dependent /// transcription from RNA polymerase II promoter /// sequence-specific DNA binding /// protein dimerization activity /// transcription factor activity /// nucleus
8151824	-0.686907	0.621184	8.93013	-5.47469	2.54788e-05	0.00144526	2.61763	RAD54B	RAD54 homolog B (S. cerevisiae)	nucleotide binding /// double-strand break repair via homologous recombination /// double-strand break repair via homologous recombination /// DNA binding /// DNA helicase activity /// RNA helicase activity /// protein binding /// ATP binding /// nucleus /// nucleus /// cytoplasm /// DNA repair /// mitotic recombination /// response to DNA damage stimulus /// reciprocal meiotic recombination /// …
8117594	-0.687126	0.62109	13.5448	-4.51421	0.000224122	0.00721022	0.483743	HIST1H2BM	histone cluster 1, H2bm	nucleosome /// DNA binding /// nucleus /// chromosome /// nucleosome assembly
8082350	-0.687178	0.621068	10.461	-6.13967	5.97296e-06	0.00052058	4.04389	MCM2	minichromosome maintenance complex component 2	nucleotide binding /// chromatin /// DNA binding /// DNA replication origin binding /// protein binding /// ATP binding /// nucleus /// nucleoplasm /// nuclear origin of replication recognition complex /// DNA replication /// DNA unwinding involved in replication /// DNA-dependent DNA replication initiation /// nucleosome assembly /// cell cycle /// regulation of transcription /// metal ion bindi…
8101828	-0.689732	0.619969	10.0692	-5.587	1.98706e-05	0.00120328	2.86207	TSPAN5	tetraspanin 5	membrane /// integral to membrane
8088397	-0.690601	0.619596	7.39047	-4.47782	0.00024368	0.00766178	0.401901	ACOX2 /// ACOX2	acyl-Coenzyme A oxidase 2, branched chain /// acyl-CoA oxidase 2, branched chain	acyl-CoA dehydrogenase activity /// acyl-CoA oxidase activity /// fatty acid binding /// peroxisome /// lipid metabolic process /// fatty acid metabolic process /// fatty acid beta-oxidation /// bile acid metabolic process /// 3alpha,7alpha,12alpha-trihydroxy-5beta-cholestanoyl-CoA 24-hydroxylase activity /// FAD binding /// oxidation reduction /// acyl-CoA oxidase activity /// peroxisome /// ele…
8036351	-0.691743	0.619105	9.02341	-5.68173	1.61294e-05	0.00102885	3.06719	ZNF850P /// ZNF850P	zinc finger protein 850 pseudogene /// zinc finger protein 850 (pseudogene)	DNA binding /// intracellular /// nucleus /// regulation of transcription, DNA-dependent /// zinc ion binding /// metal ion binding
8098904	-0.692656	0.618714	10.3263	-8.37425	6.94784e-08	1.93911e-05	8.39743	SLBP	stem-loop binding protein	mRNA binding /// protein binding /// nucleus /// cytoplasm /// mRNA processing /// histone mRNA 3'-end processing /// ribonucleoprotein complex /// DNA replication involved in S phase /// regulation of S phase /// mRNA transport /// histone pre-mRNA 3'end processing complex /// histone pre-mRNA stem-loop binding /// histone pre-mRNA DCP binding /// mRNA binding /// nucleus /// nucleoplasm /// cyt…
7925954	-0.693365	0.61841	9.87275	-8.36214	7.10489e-08	1.93911e-05	8.37577	NET1	neuroepithelial cell transforming 1	regulation of cell growth /// guanyl-nucleotide exchange factor activity /// Rho guanyl-nucleotide exchange factor activity /// cellular_component /// intracellular /// nucleus /// cytoplasm /// cytosol /// apoptosis /// signal transduction /// induction of apoptosis by extracellular signals /// regulation of Rho protein signal transduction /// guanyl-nucleotide exchange factor activity /// intra…
8062603	-0.695464	0.617511	11.6648	-5.85515	1.10393e-05	0.000797347	3.44005	TOP1	topoisomerase (DNA) I	nucleotide binding /// nuclear chromosome /// DNA binding /// chromatin binding /// DNA topoisomerase type I activity /// DNA topoisomerase (ATP-hydrolyzing) activity /// protein binding /// ATP binding /// nucleus /// nucleoplasm /// nucleolus /// cytoplasm /// DNA replication /// DNA topological change /// DNA unwinding involved in replication /// programmed cell death /// phosphorylation /// e…
7934026	-0.696096	0.61724	8.77536	-5.73126	1.44688e-05	0.000964967	3.17403	DNA2	DNA replication helicase 2 homolog (yeast)	nucleotide binding /// DNA binding /// ATP-dependent DNA helicase activity /// helicase activity /// ATP binding /// nucleoplasm /// mitochondrion /// gamma DNA polymerase complex /// mitochondrial DNA replication /// base-excision repair /// hydrolase activity /// ATPase activity /// site-specific endodeoxyribonuclease activity, specific for altered base /// 5'-flap endonuclease activity /// DNA…
7963092	-0.696624	0.617014	9.13987	-5.67398	1.64067e-05	0.00104293	3.05043	FMNL3	formin-like 3	actin binding /// protein binding /// cellular component organization /// actin cytoskeleton organization /// Rho GTPase binding
8051322	-0.697729	0.616542	6.8937	-5.42296	2.85832e-05	0.00157572	2.5046	XDH	xanthine dehydrogenase	xanthine dehydrogenase activity /// xanthine oxidase activity /// xanthine oxidase activity /// iron ion binding /// extracellular region /// cytoplasm /// peroxisome /// cytosol /// lactation /// electron carrier activity /// xanthine catabolic process /// response to aluminum ion /// oxidoreductase activity /// molybdenum ion binding /// regulation of epithelial cell differentiation /// protein…
7941214	-0.701256	0.615036	9.77332	-5.19216	4.78998e-05	0.00231483	1.99716	POLA2	polymerase (DNA directed), alpha 2 (70kD subunit)	protein import into nucleus, translocation /// molecular_function /// DNA binding /// DNA-directed DNA polymerase activity /// protein binding /// nucleus /// nucleoplasm /// alpha DNA polymerase:primase complex /// DNA replication /// protein heterodimerization activity
8155442	-0.701572	0.614902	7.26085	-5.21201	4.58096e-05	0.00225398	2.041	AQP7 /// AQP7P2 /// AQP7P1	aquaporin 7 /// aquaporin 7 pseudogene 2 /// aquaporin 7 pseudogene 1	transporter activity /// cytoplasm /// plasma membrane /// integral to plasma membrane /// cell-cell junction /// generation of precursor metabolites and energy /// water transport /// spermatogenesis /// excretion /// water channel activity /// glycerol channel activity /// urea channel activity /// glycerol transport /// urea transport /// ribonucleoprotein complex /// brush border membrane ///…
7976012	-0.701669	0.61486	6.59015	-5.21162	4.58501e-05	0.00225398	2.04013	NRXN3	neurexin 3	receptor activity /// calcium channel regulator activity /// protein binding /// integral to plasma membrane /// cell adhesion /// synaptic transmission /// neurotransmitter secretion /// axon guidance /// synapse assembly /// membrane /// integral to membrane /// metal ion binding /// calcium ion binding
7900510	-0.701849	0.614784	11.131	-8.06808	1.2296e-07	2.88325e-05	7.84342	CTPS	CTP synthase	nucleotide binding /// CTP synthase activity /// CTP synthase activity /// CTP synthase activity /// protein binding /// ATP binding /// cellular_component /// cytosol /// nucleobase, nucleoside, nucleotide and nucleic acid metabolic process /// pyrimidine nucleotide biosynthetic process /// CTP biosynthetic process /// glutamine metabolic process /// ligase activity /// response to drug
7996211	-0.704533	0.613641	9.44563	-4.72701	0.000137588	0.00504546	0.961554	GINS3	GINS complex subunit 3 (Psf3 homolog)	nucleus /// DNA replication
8026564	-0.704989	0.613447	9.19605	-5.41423	2.91441e-05	0.00160399	2.48549	KLF2	Kruppel-like factor 2 (lung)	transcription factor activity /// protein binding /// intracellular /// nucleus /// zinc ion binding /// transcription activator activity /// positive regulation of transcription /// metal ion binding
7969414	-0.705533	0.613216	9.19161	-5.64102	1.764e-05	0.00110406	2.97916	KLF5	Kruppel-like factor 5 (intestinal)	angiogenesis /// transcription factor activity /// RNA polymerase II transcription factor activity /// protein binding /// intracellular /// nucleus /// regulation of transcription, DNA-dependent /// transcription from RNA polymerase II promoter /// zinc ion binding /// positive regulation of cell proliferation /// microvillus assembly /// positive regulation of transcription /// metal ion binding
8141950	-0.706419	0.612839	6.50081	-8.83259	3.02384e-08	1.07112e-05	9.20184	RELN	reelin	cell morphogenesis involved in differentiation /// neuron migration /// protein serine/threonine/tyrosine kinase activity /// protein binding /// extracellular region /// proteinaceous extracellular matrix /// extracellular space /// cytoplasm /// cell adhesion /// multicellular organismal development /// axon guidance /// central nervous system development /// brain development /// locomotory be…
8041888	-0.706499	0.612805	9.84748	-5.53938	2.20757e-05	0.00130681	2.7586	MSH6	mutS homolog 6 (E. coli)	nucleotide binding /// magnesium ion binding /// four-way junction DNA binding /// meiotic mismatch repair /// nuclear chromatin /// chromatin binding /// damaged DNA binding /// double-stranded DNA binding /// protein binding /// ATP binding /// nucleus /// DNA repair /// mismatch repair /// mismatch repair /// determination of adult lifespan /// induction of apoptosis by intracellular signals /…
7901091	-0.71115	0.610833	10.2478	-4.3641	0.000316639	0.00913617	0.145909	TOE1	target of EGR1, member 1 (nuclear)	nucleic acid binding /// nucleus /// nucleolus /// zinc ion binding /// nuclear speck /// metal ion binding
7906863	-0.712095	0.610433	11.6336	-5.46353	2.61182e-05	0.00146902	2.59326	UAP1	UDP-N-acteylglucosamine pyrophosphorylase 1	UDP-N-acetylglucosamine diphosphorylase activity /// nucleus /// nucleolus /// cytoplasm /// UDP-N-acetylglucosamine biosynthetic process /// metabolic process /// transferase activity /// nucleotidyltransferase activity /// UDP-N-acetylglucosamine diphosphorylase activity /// cytoplasm
7981157	-0.712518	0.610254	6.81701	-5.12854	5.52759e-05	0.00258138	1.85645	C14orf139	chromosome 14 open reading frame 139	---
8166714	-0.713067	0.610022	6.54576	-5.61907	1.85138e-05	0.00114583	2.93162	LANCL3	LanC lantibiotic synthetase component C-like 3 (bacterial)	catalytic activity
8161488	-0.713301	0.609923	7.24927	-5.2257	4.44225e-05	0.00220766	2.07121	AQP7 /// AQP7P2 /// AQP7P1	aquaporin 7 /// aquaporin 7 pseudogene 2 /// aquaporin 7 pseudogene 1	transporter activity /// cytoplasm /// plasma membrane /// integral to plasma membrane /// cell-cell junction /// generation of precursor metabolites and energy /// water transport /// spermatogenesis /// excretion /// water channel activity /// glycerol channel activity /// urea channel activity /// glycerol transport /// urea transport /// ribonucleoprotein complex /// brush border membrane ///…
8041383	-0.717902	0.607981	9.55034	-4.57071	0.000196841	0.00654766	0.610761	LTBP1	latent transforming growth factor beta binding protein 1	transforming growth factor beta receptor activity /// binding /// calcium ion binding /// extracellular region /// proteinaceous extracellular matrix /// biological_process /// growth factor binding
8119974	-0.719372	0.607362	10.9601	-4.51173	0.000225403	0.00722353	0.478166	SLC29A1	solute carrier family 29 (nucleoside transporters), member 1	nucleoside transmembrane transporter activity /// protein binding /// membrane fraction /// plasma membrane /// integral to plasma membrane /// nucleobase, nucleoside, nucleotide and nucleic acid metabolic process /// transport /// nucleoside transport /// nucleoside transmembrane transporter activity /// nucleoside transport /// membrane
8091411	-0.719525	0.607297	12.8301	-9.92047	4.65813e-09	2.38618e-06	10.9954	TM4SF1	transmembrane 4 L six family member 1	molecular_function /// integral to plasma membrane /// biological_process /// membrane
7959777	-0.72221	0.606168	10.3423	-5.27327	3.99268e-05	0.00202659	2.17607	BRI3BP	BRI3 binding protein	membrane /// integral to membrane
8154725	-0.722875	0.605889	11.5338	-5.17836	4.94098e-05	0.00237762	1.96667	KRT18	keratin 18	structural molecule activity /// protein binding /// cytoplasm /// microtubule organizing center /// intermediate filament /// cell cycle /// anatomical structure morphogenesis /// centriolar satellite /// Golgi to plasma membrane CFTR protein transport /// negative regulation of apoptosis /// interspecies interaction between organisms /// keratin filament /// perinuclear region of cytoplasm /// …
7913852	-0.72372	0.605534	8.14955	-6.44397	3.13178e-06	0.000329996	4.6782	C1orf135	chromosome 1 open reading frame 135	---
8110982	-0.731687	0.602199	11.7986	-4.74531	0.000131954	0.00488186	1.00254	DAP	death-associated protein	apoptosis /// induction of apoptosis by extracellular signals
8117408	-0.732216	0.601978	7.8579	-4.54121	0.000210638	0.00688285	0.544454	HIST1H2AE	histone cluster 1, H2ae	---
8002762	-0.732261	0.60196	11.2886	-4.33227	0.000340748	0.00970563	0.0742446	RFWD3	ring finger and WD repeat domain 3	p53 binding /// ubiquitin-protein ligase activity /// protein binding /// nucleus /// zinc ion binding /// response to ionizing radiation /// protein ubiquitination /// G1/S DNA damage checkpoint /// metal ion binding /// MDM2 binding /// protein binding
8104570	-0.732581	0.601826	7.71204	-6.05619	7.14514e-06	0.000587436	3.86776	FAM105A	family with sequence similarity 105, member A	---
7959052	-0.73449	0.60103	10.131	-6.47739	2.91958e-06	0.000314606	4.74709	RFC5	replication factor C (activator 1) 5, 36.5kDa	nucleotide binding /// DNA clamp loader activity /// protein binding /// ATP binding /// nucleus /// nucleoplasm /// DNA replication factor C complex /// DNA replication /// DNA replication /// DNA repair /// nucleotide-excision repair, DNA gap filling /// nucleoside-triphosphatase activity /// enzyme binding
8142120	-0.735064	0.600791	11.7265	-5.70549	1.53099e-05	0.000992105	3.11847	NAMPT	nicotinamide phosphoribosyltransferase	cytokine activity /// cytoplasm /// cytosol /// nicotinamide metabolic process /// signal transduction /// cell-cell signaling /// positive regulation of cell proliferation /// insulin receptor signaling pathway /// transferase activity, transferring glycosyl groups /// pyridine nucleotide biosynthetic process /// NAD metabolic process /// nicotinamide phosphoribosyltransferase activity /// posit…
8072382	-0.735917	0.600436	7.88562	-5.95489	8.89072e-06	0.000678978	3.65288	OSBP2	oxysterol binding protein 2	lipid transport /// steroid metabolic process /// membrane
8072413	-0.73753	0.599765	9.62654	-4.57945	0.000192928	0.00644324	0.630418	SMTN	smoothelin	actin binding /// cytoplasm /// cytoskeleton /// smooth muscle contraction /// muscle organ development /// structural constituent of muscle /// actin cytoskeleton
7972946	-0.737543	0.59976	9.22421	-6.46394	3.00315e-06	0.000321019	4.71938	RASA3	RAS p21 protein activator 3	GTPase activator activity /// intracellular /// plasma membrane /// signal transduction /// calcium-release channel activity /// intrinsic to internal side of plasma membrane /// metal ion binding /// regulation of small GTPase mediated signal transduction /// GTPase activator activity /// intracellular signaling cascade /// zinc ion binding
7930927	-0.738632	0.599308	8.91766	-6.23613	4.86129e-06	0.000448383	4.24628	INPP5F	inositol polyphosphate-5-phosphatase F	hydrolase activity
8068478	-0.740178	0.598666	10.1772	-4.46053	0.000253572	0.00785413	0.362988	CHAF1B	chromatin assembly factor 1, subunit B (p60)	chromatin binding /// protein binding /// nucleus /// nucleus /// nucleoplasm /// chromatin assembly complex /// cytoplasm /// mitochondrion /// cytosol /// DNA replication /// DNA repair /// DNA replication-dependent nucleosome assembly /// protein complex assembly /// cell cycle /// histone binding /// regulation of transcription /// unfolded protein binding /// response to DNA damage stimulus
8103932	-0.740767	0.598421	10.2233	-6.74335	1.67903e-06	0.00020978	5.28999	MLF1IP	MLF1 interacting protein	condensed chromosome kinetochore /// protein binding /// nucleus /// chromosome /// cytoplasm /// interspecies interaction between organisms /// regulation of transcription
7906264	-0.743873	0.597134	8.14318	-5.16006	5.14865e-05	0.00244581	1.92622	PEAR1	platelet endothelial aggregation receptor 1	plasma membrane /// integral to membrane
8105267	-0.744294	0.59696	12.3554	-6.16781	5.62395e-06	0.000499361	4.10307	ITGA2	integrin, alpha 2 (CD49B, alpha 2 subunit of VLA-2 receptor)	response to hypoxia /// tissue homeostasis /// positive regulation of leukocyte migration /// receptor activity /// integrin binding /// protein binding /// collagen binding /// nucleus /// plasma membrane /// focal adhesion /// cellular component movement /// hypotonic response /// cell adhesion /// cell-matrix adhesion /// integrin-mediated signaling pathway /// blood coagulation /// cell proli…
7952274	-0.744513	0.596869	8.1821	-5.71057	1.51401e-05	0.000990415	3.12943	PVRL1	poliovirus receptor-related 1 (herpesvirus entry mediator C)	lens morphogenesis in camera-type eye /// protein binding /// extracellular region /// microsome /// plasma membrane /// adherens junction /// cell-cell adherens junction /// immune response /// cell adhesion /// homophilic cell adhesion /// heterophilic cell-cell adhesion /// axon guidance /// coreceptor activity /// membrane /// integral to membrane /// cell-cell adhesion /// catenin complex //…
8014454	-0.746313	0.596125	10.2643	-5.87991	1.04606e-05	0.000763523	3.49299	MYO19	myosin XIX	nucleotide binding /// motor activity /// actin binding /// ATP binding /// cytoplasm /// myosin complex
8117225	-0.746368	0.596102	10.4578	-7.10348	8.05885e-07	0.000124229	6.00922	GMNN	geminin, DNA replication inhibitor	protein binding /// nucleus /// nucleoplasm /// negative regulation of DNA replication /// organ morphogenesis /// negative regulation of cell cycle
7994541	-0.747898	0.595471	9.54642	-4.85071	0.000103749	0.00406894	1.23835	LAT /// SPNS1	linker for activation of T cells /// spinster homolog 1 (Drosophila)	immunological synapse /// SH3/SH2 adaptor activity /// protein binding /// plasma membrane /// immune response /// integrin-mediated signaling pathway /// Ras protein signal transduction /// integral to membrane /// calcium-mediated signaling /// mast cell degranulation /// membrane raft /// regulation of T cell activation /// mitochondrion /// mitochondrial inner membrane /// lipid transport ///…
7914141	-0.752709	0.593488	8.44498	-6.73438	1.71039e-06	0.000212503	5.27184	RPA2	replication protein A2, 32kDa	nucleotide-excision repair, DNA damage removal /// nucleic acid binding /// single-stranded DNA binding /// protein binding /// nucleus /// nucleoplasm /// DNA replication factor A complex /// DNA replication /// DNA-dependent DNA replication /// nucleotide-excision repair, DNA gap filling
8160521	-0.753694	0.593083	8.17069	-4.81675	0.000112097	0.00428172	1.16244	MOBKL2B	MOB1, Mps One Binder kinase activator-like 2B (yeast)	protein binding /// metal ion binding /// zinc ion binding
7984588	-0.754689	0.592674	8.00169	-5.75936	1.36055e-05	0.000917048	3.23453	THSD4	thrombospondin, type I, domain containing 4	metalloendopeptidase activity /// extracellular region /// proteinaceous extracellular matrix /// peptidase activity
8133872	-0.76017	0.590427	5.18882	-4.73085	0.000136388	0.00500695	0.970144	---	---	---
8015769	-0.766608	0.587798	8.97713	-4.50132	0.000230862	0.00735599	0.454756	BRCA1	breast cancer 1, early onset	ubiquitin ligase complex /// double-strand break repair via homologous recombination /// DNA binding /// transcription coactivator activity /// RNA binding /// ubiquitin-protein ligase activity /// protein binding /// intracellular /// nucleus /// nucleoplasm /// cytoplasm /// postreplication repair /// double-strand break repair /// regulation of transcription from RNA polymerase II promoter ///…
7933084	-0.766976	0.587648	12.1307	-5.96125	8.76934e-06	0.000672794	3.66639	NAMPT	nicotinamide phosphoribosyltransferase	cytokine activity /// cytoplasm /// cytosol /// nicotinamide metabolic process /// signal transduction /// cell-cell signaling /// positive regulation of cell proliferation /// insulin receptor signaling pathway /// transferase activity, transferring glycosyl groups /// pyridine nucleotide biosynthetic process /// NAD metabolic process /// nicotinamide phosphoribosyltransferase activity /// posit…
8129804	-0.776975	0.583589	8.3207	-5.96384	8.72037e-06	0.000672794	3.6719	MAP3K5	mitogen-activated protein kinase kinase kinase 5	MAPKKK cascade /// nucleotide binding /// magnesium ion binding /// protein serine/threonine kinase activity /// MAP kinase kinase kinase activity /// protein binding /// ATP binding /// apoptosis /// activation of JUN kinase activity /// induction of apoptosis by extracellular signals /// caspase activator activity /// transferase activity /// identical protein binding /// protein homodimerizati…
8038624	-0.777123	0.583529	10.5319	-6.6031	2.24515e-06	0.000266039	5.00493	C19orf48	chromosome 19 open reading frame 48	---
8113790	-0.780901	0.582003	8.7554	-6.8266	1.41478e-06	0.000184737	5.4579	2011-03-03	membrane-associated ring finger (C3HC4) 3	endosome /// endocytosis /// zinc ion binding /// membrane /// integral to membrane /// ligase activity /// cytoplasmic vesicle membrane /// cytoplasmic vesicle /// early endosome membrane /// metal ion binding /// modification-dependent protein catabolic process
7963280	-0.78111	0.581919	10.9765	-5.22146	4.48472e-05	0.00221554	2.06186	SMAGP /// SMAGP	small trans-membrane and glycosylated protein /// small cell adhesion glycoprotein	plasma membrane /// integral to membrane /// cytoplasmic vesicle membrane /// cytoplasmic vesicle
8092640	-0.782791	0.581241	10.9132	-4.75601	0.000128765	0.00479048	1.02652	RFC4	replication factor C (activator 1) 4, 37kDa	nucleotide binding /// DNA clamp loader activity /// protein binding /// ATP binding /// nucleus /// nucleoplasm /// DNA replication factor C complex /// DNA replication /// DNA replication /// DNA strand elongation involved in DNA replication /// DNA repair /// nucleotide-excision repair, DNA gap filling /// nucleoside-triphosphatase activity /// phosphoinositide-mediated signaling /// DNA stran…
7972674	-0.785759	0.580047	9.36187	-6.88521	1.25481e-06	0.000170537	5.57551	C13orf27	chromosome 13 open reading frame 27	hydrolase activity
8051762	-0.787188	0.579472	7.73485	-5.05167	6.57516e-05	0.00293476	1.686	SLC8A1	solute carrier family 8 (sodium/calcium exchanger), member 1	response to hypoxia /// regulation of the force of heart contraction /// regulation of sodium ion transport /// calcium:sodium antiporter activity /// calmodulin binding /// membrane fraction /// plasma membrane /// integral to plasma membrane /// caveola /// ion transport /// sodium ion transport /// calcium ion transport /// cellular calcium ion homeostasis /// muscle contraction /// cell commu…
8154316	-0.78809	0.57911	10.2614	-8.93153	2.53563e-08	9.2779e-06	9.37162	UHRF2	ubiquitin-like with PHD and ring finger domains 2	DNA binding /// ubiquitin-protein ligase activity /// protein binding /// nucleus /// ubiquitin-dependent protein catabolic process /// zinc ion binding /// cell proliferation /// protein ubiquitination /// ligase activity /// cell differentiation /// metal ion binding /// regulation of cell cycle /// protein autoubiquitination
8057732	-0.788522	0.578937	9.26629	-7.48009	3.81083e-07	7.1286e-05	6.74142	TMEM194B	transmembrane protein 194B	membrane /// integral to membrane
8044499	-0.789526	0.578534	12.3788	-6.84953	1.34982e-06	0.000177648	5.50398	SLC20A1	solute carrier family 20 (phosphate transporter), member 1	signal transducer activity /// receptor activity /// inorganic phosphate transmembrane transporter activity /// high affinity inorganic phosphate:sodium symporter activity /// sodium:phosphate symporter activity /// integral to plasma membrane /// phosphate metabolic process /// transport /// sodium ion transport /// phosphate transport /// symporter activity /// membrane /// positive regulation …
8017210	-0.790609	0.5781	10.4691	-4.32078	0.000349899	0.00986466	0.0483691	AP1S2 /// LOC653653	adaptor-related protein complex 1, sigma 2 subunit /// adaptor-related protein complex 1, sigma 2 subunit pseudogene	protein binding /// Golgi apparatus /// cytosol /// coated pit /// intracellular protein transport /// post-Golgi vesicle-mediated transport /// endocytosis /// protein transporter activity /// membrane /// cellular membrane organization /// AP-type membrane coat adaptor complex /// clathrin coat of trans-Golgi network vesicle /// clathrin adaptor complex /// cytoplasmic vesicle membrane /// cyto…
7952341	-0.792757	0.57724	10.6092	-5.06692	6.35236e-05	0.00286217	1.71986	ASAM	adipocyte-specific adhesion molecule	membrane fraction /// nucleus /// cytoplasm /// plasma membrane /// tight junction /// integral to membrane /// cell junction /// plasma membrane /// cell junction
8161520	-0.793717	0.576856	9.17151	-4.32257	0.000348456	0.00985721	0.0524044	PGM5 /// PGM5P2	phosphoglucomutase 5 /// phosphoglucomutase 5 pseudogene 2	magnesium ion binding /// stress fiber /// phosphoglucomutase activity /// structural molecule activity /// protein binding /// cytoplasm /// cytoskeleton /// cell-cell adherens junction /// spot adherens junction /// focal adhesion /// carbohydrate metabolic process /// glucose metabolic process /// cell adhesion /// biological_process /// internal side of plasma membrane /// intercalated disc /…
8108217	-0.793928	0.576772	8.18286	-6.5757	2.37703e-06	0.000273869	4.94891	TGFBI	transforming growth factor, beta-induced, 68kDa	integrin binding /// protein binding /// extracellular region /// proteinaceous extracellular matrix /// extracellular space /// negative regulation of cell adhesion /// visual perception /// cell proliferation /// extracellular matrix organization /// extracellular matrix binding /// response to stimulus /// extracellular space /// visual perception
8122807	-0.797798	0.575227	9.59477	-7.75615	2.22782e-07	4.66539e-05	7.26505	AKAP12	A kinase (PRKA) anchor protein 12	nucleus /// cytoplasm /// cytoskeleton /// plasma membrane /// cell cortex /// protein targeting /// signal transduction /// G-protein coupled receptor protein signaling pathway /// adenylate cyclase binding /// positive regulation of protein kinase A signaling cascade /// positive regulation of cAMP biosynthetic process /// protein kinase A binding /// cytoplasm
8020468	-0.798375	0.574996	10.5456	-5.40734	2.95946e-05	0.00162341	2.47041	RBBP8	retinoblastoma binding protein 8	cell cycle checkpoint /// protein binding /// nucleus /// DNA repair /// regulation of transcription from RNA polymerase II promoter /// nucleus
8170420	-0.798916	0.574781	8.45984	-6.43289	3.20559e-06	0.000332551	4.65533	MAMLD1	mastermind-like domain containing 1	molecular_function /// cellular_component /// nucleus /// biological_process /// regulation of transcription
8084794	-0.798997	0.574748	8.62241	-4.84763	0.000104481	0.00408801	1.23146	IL1RAP	interleukin 1 receptor accessory protein	signal transducer activity /// transmembrane receptor activity /// interleukin-1 receptor activity /// protein binding /// extracellular region /// plasma membrane /// integral to plasma membrane /// protein complex assembly /// inflammatory response /// immune response /// signal transduction /// innate immune response
8100382	-0.799143	0.574691	10.5942	-5.19768	4.73085e-05	0.00229625	2.00937	CHIC2	cysteine-rich hydrophobic domain 2	molecular_function /// protein binding /// cellular_component /// Golgi apparatus /// Golgi-associated vesicle /// plasma membrane /// biological_process /// cytoplasmic vesicle
7940153	-0.801194	0.573874	10.7538	-8.66285	4.10207e-08	1.28855e-05	8.90739	FAM111A	family with sequence similarity 111, member A	catalytic activity /// serine-type endopeptidase activity /// proteolysis
8120602	-0.80142	0.573784	10.9881	-6.07471	6.86609e-06	0.000570125	3.90692	OGFRL1	opioid growth factor receptor-like 1	receptor activity /// membrane
8003503	-0.805144	0.572305	9.15968	-8.1884	9.81078e-08	2.47477e-05	8.06274	ZNF276 /// FANCA	zinc finger protein 276 /// Fanconi anemia, complementation group A	protein binding /// nucleus /// cytoplasm /// DNA repair /// protein complex assembly /// male meiosis /// male gonad development /// female gonad development /// regulation of cell proliferation /// DNA binding /// intracellular /// zinc ion binding /// regulation of transcription /// metal ion binding /// nucleus /// cytoplasm /// DNA repair /// response to DNA damage stimulus
7969204	-0.80922	0.57069	9.34996	-7.56664	3.21698e-07	6.22767e-05	6.90678	WDFY2	WD repeat and FYVE domain containing 2	zinc ion binding /// metal ion binding
8072242	-0.811994	0.569594	11.0494	-5.83206	1.16086e-05	0.000829467	3.39061	NF2	neurofibromin 2 (merlin)	mesoderm formation /// negative regulation of cell-matrix adhesion /// protein binding /// nucleus /// nucleolus /// cytoplasm /// early endosome /// cytoskeleton /// plasma membrane /// adherens junction /// negative regulation of protein kinase activity /// ectoderm development /// cytoskeletal protein binding /// negative regulation of DNA replication /// negative regulation of cell proliferat…
8142230	-0.813409	0.569036	7.33938	-4.77257	0.000123986	0.00465621	1.0636	---	---	---
7953218	-0.813694	0.568923	9.42756	-5.94455	9.09202e-06	0.000692762	3.63086	RAD51AP1	RAD51 associated protein 1	double-strand break repair via homologous recombination /// DNA binding /// double-stranded DNA binding /// single-stranded DNA binding /// RNA binding /// protein binding /// nucleus /// DNA repair /// response to DNA damage stimulus
8111153	-0.81806	0.567204	11.0926	-7.366	4.77169e-07	8.31849e-05	6.52178	MYO10	myosin X	nucleotide binding /// motor activity /// actin binding /// ATP binding /// cytoskeleton /// signal transduction /// myosin complex
7901867	-0.818826	0.566903	9.91549	-5.69909	1.55265e-05	0.000999972	3.10465	USP1	ubiquitin specific peptidase 1	cysteine-type endopeptidase activity /// ubiquitin thiolesterase activity /// ubiquitin-specific protease activity /// protein binding /// nucleus /// nucleoplasm /// regulation of DNA repair /// ubiquitin-dependent protein catabolic process /// peptidase activity /// response to UV /// protein deubiquitination /// response to DNA damage stimulus
8112376	-0.819932	0.566469	10.7903	-5.05628	6.507e-05	0.00291607	1.69624	CENPK	centromere protein K	condensed chromosome kinetochore /// protein binding /// nucleus /// chromosome /// positive regulation of transcription from RNA polymerase II promoter /// chromosome, centromeric region
8180352	-0.820631	0.566194	7.19868	-6.03207	7.52601e-06	0.000611204	3.81671	---	---	---
8102950	-0.822179	0.565587	8.93912	-6.1836	5.43742e-06	0.000488403	4.13621	INPP4B	inositol polyphosphate-4-phosphatase, type II, 105kDa	signal transduction /// phosphatidylinositol-3,4-bisphosphate 4-phosphatase activity /// hydrolase activity /// phosphatidyl-inositol-4,5-bisphosphate 4-phosphatase activity /// phosphatidylinositol-3,4-bisphosphate 4-phosphatase activity
8120880	-0.824743	0.564583	9.98838	-5.92732	9.43787e-06	0.000711038	3.59416	TPBG	trophoblast glycoprotein	protein binding /// cytoplasm /// endoplasmic reticulum /// integral to plasma membrane /// cell adhesion /// membrane
8085145	-0.824747	0.564581	11.0334	-4.93901	8.48751e-05	0.00353261	1.43537	RAD18	RAD18 homolog (S. cerevisiae)	Y-form DNA binding /// chromatin /// damaged DNA binding /// protein binding /// nucleus /// replication fork /// DNA repair /// zinc ion binding /// ligase activity /// ubiquitin protein ligase binding /// metal ion binding /// response to DNA damage stimulus /// modification-dependent protein catabolic process
8041867	-0.833016	0.561355	9.54037	-4.66947	0.000156952	0.00558933	0.832527	MSH2	mutS homolog 2, colon cancer, nonpolyposis type 1 (E. coli)	nucleotide binding /// magnesium ion binding /// four-way junction DNA binding /// in utero embryonic development /// DNA binding /// damaged DNA binding /// double-stranded DNA binding /// single-stranded DNA binding /// protein binding /// ATP binding /// nucleus /// oxidative phosphorylation /// DNA repair /// mismatch repair /// postreplication repair /// double-strand break repair /// cellul…
8091402	-0.833818	0.561043	6.00907	-5.19248	4.78653e-05	0.00231483	1.99787	TM4SF18	transmembrane 4 L six family member 18	membrane /// integral to membrane
8065071	-0.838036	0.559405	8.25236	-4.86649	0.000100088	0.00397752	1.27359	FLRT3	fibronectin leucine rich transmembrane protein 3	receptor signaling protein activity /// proteinaceous extracellular matrix /// integral to plasma membrane /// cell adhesion /// biological_process /// membrane /// protein binding, bridging
8071212	-0.842848	0.557542	9.89973	-5.13169	5.48841e-05	0.00257029	1.86344	CDC45L /// CDC45	CDC45 cell division cycle 45-like (S. cerevisiae) /// cell division cycle 45 homolog (S. cerevisiae)	DNA replication checkpoint /// protein binding /// nucleus /// nucleoplasm /// cytoplasm /// centrosome /// DNA replication /// DNA-dependent DNA replication initiation /// cell cycle /// nucleus /// cytoplasm /// DNA replication /// DNA replication initiation
7997491	-0.843612	0.557246	6.75804	-4.71209	0.000142365	0.00515813	0.928107	HSD17B2	hydroxysteroid (17-beta) dehydrogenase 2	estradiol 17-beta-dehydrogenase activity /// binding /// endoplasmic reticulum membrane /// steroid biosynthetic process /// membrane /// integral to membrane /// oxidoreductase activity /// response to retinoic acid /// 20-alpha-hydroxysteroid dehydrogenase activity /// testosterone 17-beta-dehydrogenase activity /// oxidation reduction /// estradiol 17-beta-dehydrogenase activity /// testostero…
8086981	-0.846065	0.5563	8.64407	-5.48576	2.48604e-05	0.00142475	2.64179	UCN2	urocortin 2	G-protein-coupled receptor binding /// receptor binding /// hormone activity /// extracellular region /// cAMP biosynthetic process /// response to stress /// digestion /// cell proliferation /// hormone binding
7903867	-0.850757	0.554494	8.24648	-8.81713	3.10857e-08	1.08954e-05	9.17518	KCNC4	potassium voltage-gated channel, Shaw-related subfamily, member 4	voltage-gated ion channel activity /// voltage-gated potassium channel activity /// potassium channel activity /// protein binding /// ion transport /// potassium ion transport /// synaptic transmission /// voltage-gated potassium channel complex /// membrane /// integral to membrane /// transmembrane transport /// voltage-gated potassium channel activity /// potassium ion transport /// voltage-g…
7969576	-0.851402	0.554246	8.16101	-4.88467	9.60322e-05	0.00385659	1.31418	MIR17HG /// MIR17 /// MIR19A /// MIR20A /// MIR92A1 /// MIR19B1 /// MIR18A	MIR17 host gene (non-protein coding) /// microRNA 17 /// microRNA 19a /// microRNA 20a /// microRNA 92a-1 /// microRNA 19b-1 /// microRNA 18a	---
8045664	-0.851802	0.554092	7.28581	-4.8301	0.000108738	0.00419055	1.19229	LYPD6B	LY6/PLAUR domain containing 6B	plasma membrane /// anchored to membrane
7914665	-0.854352	0.553114	7.31901	-5.02121	7.04435e-05	0.0030822	1.61832	---	---	---
8172270	-0.85454	0.553042	9.54413	-5.21627	4.53736e-05	0.00223823	2.0504	---	---	---
7952445	-0.855449	0.552693	9.64822	-8.6974	3.854e-08	1.23238e-05	8.96766	C11orf61	chromosome 11 open reading frame 61	---
7968563	-0.855625	0.552626	11.5991	-4.64255	0.000166935	0.00583258	0.772118	RFC3	replication factor C (activator 1) 3, 38kDa	nucleotide binding /// DNA synthesis involved in DNA repair /// DNA binding /// DNA clamp loader activity /// protein binding /// ATP binding /// nucleus /// nucleoplasm /// DNA replication factor C complex /// DNA replication factor C complex /// DNA replication /// DNA replication /// DNA strand elongation involved in DNA replication /// nucleotide-excision repair, DNA gap filling /// ATPase ac…
7936115	-0.861252	0.550475	7.74761	-5.09201	6.00235e-05	0.00273781	1.77552	SH3PXD2A	SH3 and PX domains 2A	podosome /// protein binding /// cytoplasm /// cell communication /// phosphoinositide binding /// cell projection /// protein binding
8107100	-0.862122	0.550143	9.05015	-9.16728	1.67499e-08	6.71952e-06	9.77069	RGMB	RGM domain family, member B	ER-Golgi intermediate compartment /// plasma membrane /// cell adhesion /// signal transduction /// BMP signaling pathway /// identical protein binding /// membrane raft /// positive regulation of transcription /// anchored to plasma membrane
7952453	-0.867148	0.548229	8.1872	-7.26269	5.85805e-07	9.70426e-05	6.32127	ROBO4	roundabout homolog 4, magic roundabout (Drosophila)	angiogenesis /// receptor activity /// multicellular organismal development /// integral to membrane /// cell differentiation /// regulation of cell migration
8005235	-0.868189	0.547834	9.01646	-5.2667	4.05196e-05	0.00205043	2.16158	MPRIP	myosin phosphatase Rho interacting protein	actin binding /// protein binding /// cytoplasm /// cytoskeleton
7981346	-0.869187	0.547455	8.23757	-5.21051	4.59636e-05	0.00225398	2.0377	RAGE	renal tumor antigen	nucleotide binding /// protein kinase activity /// protein serine/threonine kinase activity /// cyclin-dependent protein kinase activity /// protein binding /// ATP binding /// cytoplasm /// protein amino acid phosphorylation /// signal transduction /// transferase activity /// cytoplasm /// protein amino acid phosphorylation
8068633	-0.871244	0.546675	7.02587	-4.4802	0.000242353	0.0076299	0.407242	B3GALT5	UDP-Gal:betaGlcNAc beta 1,3-galactosyltransferase, polypeptide 5	Golgi membrane /// endoplasmic reticulum /// Golgi apparatus /// protein amino acid glycosylation /// galactosyltransferase activity /// UDP-galactose:beta-N-acetylglucosamine beta-1,3-galactosyltransferase activity /// membrane /// integral to membrane /// transferase activity, transferring glycosyl groups /// protein amino acid glycosylation
8131944	-0.872896	0.54605	9.98583	-7.87423	1.77628e-07	3.89109e-05	7.48565	NFE2L3	nuclear factor (erythroid-derived 2)-like 3	transcription factor activity /// transcription coactivator activity /// nucleus /// regulation of transcription, DNA-dependent /// transcription from RNA polymerase II promoter /// sequence-specific DNA binding /// protein dimerization activity /// transcription factor activity
7981142	-0.873877	0.545679	8.79867	-4.45138	0.000258968	0.00794003	0.342398	CLMN	calmin (calponin-like, transmembrane)	actin binding /// cytoplasm /// membrane /// integral to membrane
8151423	-0.877123	0.544452	9.28266	-6.43852	3.16788e-06	0.000331701	4.66695	JPH1	junctophilin 1	molecular_function /// microsome /// plasma membrane /// muscle organ development /// structural constituent of muscle /// junctional sarcoplasmic reticulum membrane /// integral to membrane /// Z disc /// junctional membrane complex /// regulation of ryanodine-sensitive calcium-release channel activity /// calcium ion transport into cytosol /// sarcoplasmic reticulum
8179228	-0.879231	0.543657	9.5564	-5.47542	2.54374e-05	0.00144526	2.61923	TCF19	transcription factor 19	transcription factor activity /// protein binding /// nucleus /// regulation of transcription from RNA polymerase II promoter /// zinc ion binding /// cell proliferation /// regulation of transcription /// metal ion binding
8113130	-0.882627	0.542379	9.00622	-8.779	3.32814e-08	1.14671e-05	9.10932	MCTP1	multiple C2 domains, transmembrane 1	calcium ion binding /// calcium-dependent phospholipid binding /// membrane fraction /// membrane /// integral to membrane /// calcium-mediated signaling
7898161	-0.883351	0.542107	10.0715	-5.87668	1.05344e-05	0.000764194	3.48608	EFHD2	EF-hand domain family, member D2	calcium ion binding /// protein binding /// membrane /// membrane raft
7942832	-0.8858	0.541187	9.65778	-4.87327	9.85553e-05	0.00393054	1.28873	C11orf82	chromosome 11 open reading frame 82	nucleus /// cytoplasm /// apoptosis /// cell cycle /// cell cycle arrest
7947363	-0.887461	0.540565	8.65019	-9.8934	4.87173e-09	2.45779e-06	10.9527	WT1	Wilms tumor 1	negative regulation of transcription from RNA polymerase II promoter /// vasculogenesis /// metanephros development /// branching involved in ureteric bud morphogenesis /// kidney development /// mesonephros development /// double-stranded DNA binding /// transcription factor activity /// RNA binding /// protein binding /// intracellular /// nucleus /// nucleus /// nucleus /// nucleoplasm /// cyt…
8114536	-0.888286	0.540256	9.56636	-5.71687	1.49326e-05	0.000979888	3.14301	TMEM173	transmembrane protein 173	protein binding /// mitochondrion /// mitochondrial outer membrane /// endoplasmic reticulum /// endoplasmic reticulum membrane /// plasma membrane /// apoptosis /// integral to membrane /// innate immune response
7970441	-0.888489	0.54018	7.30575	-4.62613	0.00017334	0.00598102	0.735248	GJB2	gap junction protein, beta 2, 26kDa	Golgi membrane /// gap junction channel activity /// protein binding /// plasma membrane /// connexon complex /// transport /// cell-cell signaling /// sensory perception of sound /// integral to membrane /// lateral plasma membrane /// cell junction /// male genitalia development /// plasma membrane /// connexon complex /// cell-cell signaling /// sensory perception of sound
7949364	-0.888993	0.539991	9.3924	-5.88448	1.03575e-05	0.000759631	3.50274	CDCA5	cell division cycle associated 5	G1/S transition of mitotic cell cycle /// chromatin binding /// protein binding /// nucleus /// cytoplasm /// cell cycle /// mitosis /// mitotic chromosome condensation /// mitotic metaphase plate congression /// cohesin complex /// cell division /// interphase of mitotic cell cycle
7980233	-0.88922	0.539906	8.42918	-4.73924	0.000133797	0.00493358	0.988946	PGF	placental growth factor	angiogenesis /// branching involved in ureteric bud morphogenesis /// response to hypoxia /// positive regulation of endothelial cell proliferation /// protein binding /// extracellular region /// extracellular space /// signal transduction /// cell-cell signaling /// multicellular organismal development /// female pregnancy /// growth factor activity /// heparin binding /// positive regulation o…
8061247	-0.894305	0.538006	9.20707	-6.14457	5.91065e-06	0.000516554	4.0542	RIN2	Ras and Rab interactor 2	small GTPase regulator activity /// GTPase activator activity /// protein binding /// cellular_component /// cytoplasm /// endocytosis /// signal transduction /// small GTPase mediated signal transduction /// Rab guanyl-nucleotide exchange factor activity
8124524	-0.896606	0.537149	10.7129	-5.32137	3.58523e-05	0.00187405	2.28186	HIST1H2BN /// HIST1H2AK	histone cluster 1, H2bn /// histone cluster 1, H2ak	nucleosome /// DNA binding /// nucleus /// chromosome /// nucleosome assembly
8107594	-0.902374	0.535006	6.88875	-6.23854	4.83632e-06	0.000448383	4.25134	SNCAIP	synuclein, alpha interacting protein	protein binding /// protein binding /// cytoplasm /// dopamine metabolic process /// presynaptic membrane /// neuronal cell body /// regulation of neurotransmitter secretion /// regulation of inclusion body assembly /// cell soma
8043945	-0.906224	0.53358	10.7699	-5.3972	3.02702e-05	0.00164802	2.44822	MAP4K4	mitogen-activated protein kinase kinase kinase kinase 4	nucleotide binding /// protein serine/threonine kinase activity /// small GTPase regulator activity /// ATP binding /// cellular_component /// protein amino acid phosphorylation /// response to stress /// intracellular protein kinase cascade /// transferase activity /// protein kinase cascade
8171381	-0.910357	0.532054	8.40163	-5.72927	1.45321e-05	0.000964967	3.16974	FANCB	Fanconi anemia, complementation group B	nucleus /// DNA repair /// response to DNA damage stimulus
7969544	-0.914322	0.530593	9.42965	-4.3998	0.000291626	0.00863136	0.226307	NDFIP2	Nedd4 family interacting protein 2	Golgi membrane /// signal transducer activity /// protein binding /// cytoplasm /// mitochondrion /// endosome /// endoplasmic reticulum /// Golgi apparatus /// endosome membrane /// negative regulation of gene expression /// membrane /// integral to membrane /// positive regulation of protein ubiquitination /// negative regulation of transporter activity /// multivesicular body membrane /// posi…
7986068	-0.918855	0.528929	9.51116	-5.77832	1.30531e-05	0.00089246	3.27529	BLM	Bloom syndrome, RecQ helicase-like	regulation of cyclin-dependent protein kinase activity /// G2 phase of mitotic cell cycle /// nucleotide binding /// bubble DNA binding /// telomere maintenance /// double-strand break repair via homologous recombination /// DNA strand annealing activity /// chromosome, telomeric region /// lateral element /// male germ cell nucleus /// p53 binding /// DNA binding /// single-stranded DNA binding …
8154100	-0.922142	0.527725	7.98535	-4.54442	0.000209091	0.00685997	0.55167	VLDLR	very low density lipoprotein receptor	response to hypoxia /// receptor activity /// low-density lipoprotein receptor activity /// calcium ion binding /// protein binding /// extracellular space /// membrane fraction /// nucleus /// plasma membrane /// coated pit /// lipid transport /// endocytosis /// signal transduction /// nervous system development /// response to nutrient /// memory /// steroid metabolic process /// cholesterol m…
7916167	-0.92267	0.527532	9.22198	-4.86069	0.000101419	0.00402016	1.26064	ORC1L	origin recognition complex, subunit 1-like (yeast)	nucleotide binding /// origin recognition complex /// DNA binding /// protein binding /// ATP binding /// nucleus /// nucleoplasm /// cytosol /// DNA replication /// DNA-dependent DNA replication initiation /// nucleoside-triphosphatase activity /// DNA binding /// nucleus /// DNA replication /// DNA replication initiation
8166355	-0.924726	0.526781	8.52429	-5.37479	3.18205e-05	0.00171168	2.39912	CNKSR2	connector enhancer of kinase suppressor of Ras 2	protein binding /// cytoplasm /// centrosome /// plasma membrane /// regulation of signal transduction
8065710	-0.929633	0.524992	9.43909	-6.95661	1.08484e-06	0.000153059	5.71814	E2F1	E2F transcription factor 1	G1 phase of mitotic cell cycle /// negative regulation of transcription from RNA polymerase II promoter /// DNA binding /// DNA binding /// transcription factor activity /// transcription factor activity /// transcription corepressor activity /// protein binding /// nucleus /// nucleoplasm /// transcription factor complex /// cytoplasm /// mitochondrion /// apoptosis /// transcription factor bind…
7936706	-0.931321	0.524378	10.9686	-10.5016	1.8147e-09	1.28562e-06	11.8901	C10orf119	chromosome 10 open reading frame 119	molecular_function /// cellular_component /// biological_process
7965343	-0.935296	0.522935	10.0738	-4.44464	0.000263016	0.00804192	0.327234	WDR51B /// GALNT4 /// POC1B	WD repeat domain 51B /// UDP-N-acetyl-alpha-D-galactosamine:polypeptide N-acetylgalactosaminyltransferase 4 (GalNAc-T4) /// POC1 centriolar protein homolog B (Chlamydomonas)	Golgi membrane /// polypeptide N-acetylgalactosaminyltransferase activity /// sugar binding /// Golgi apparatus /// carbohydrate metabolic process /// membrane /// integral to membrane /// transferase activity, transferring glycosyl groups /// perinuclear region of cytoplasm
8145281	-0.937581	0.522107	10.7219	-11.9501	2.02044e-10	3.05794e-07	13.9441	SLC25A37	solute carrier family 25, member 37	iron ion transmembrane transporter activity /// binding /// mitochondrion /// mitochondrial inner membrane /// ion transport /// membrane /// integral to membrane /// mitochondrial iron ion transport /// transmembrane transport /// iron ion binding /// iron ion transport
8068022	-0.939482	0.52142	8.601	-5.83703	1.14836e-05	0.000824069	3.40126	MIR155 /// MIR155HG	microRNA 155 /// MIR155 host gene (non-protein coding)	---
8135363	-0.943115	0.520109	8.20078	-6.07653	6.83935e-06	0.000569325	3.91075	PIK3CG	phosphoinositide-3-kinase, catalytic, gamma polypeptide	nucleotide binding /// inositol or phosphatidylinositol kinase activity /// protein binding /// ATP binding /// cytosol /// phosphoinositide 3-kinase complex /// protein amino acid phosphorylation /// G-protein coupled receptor protein signaling pathway /// 1-phosphatidylinositol-3-kinase activity /// transferase activity /// phosphotransferase activity, alcohol group as acceptor /// negative reg…
8118086	-0.944582	0.51958	9.59058	-6.26065	4.61412e-06	0.000430354	4.29755	TCF19	transcription factor 19	transcription factor activity /// protein binding /// nucleus /// regulation of transcription from RNA polymerase II promoter /// zinc ion binding /// cell proliferation /// regulation of transcription /// metal ion binding
8177947	-0.944582	0.51958	9.59058	-6.26065	4.61412e-06	0.000430354	4.29755	TCF19	transcription factor 19	transcription factor activity /// protein binding /// nucleus /// regulation of transcription from RNA polymerase II promoter /// zinc ion binding /// cell proliferation /// regulation of transcription /// metal ion binding
7965652	-0.946553	0.518871	10.4024	-5.13533	5.44357e-05	0.00255288	1.8715	PCTK2 /// CDK17	PCTAIRE protein kinase 2 /// cyclin-dependent kinase 17	nucleotide binding /// protein kinase activity /// cyclin-dependent protein kinase activity /// ATP binding /// protein amino acid phosphorylation /// transferase activity /// protein amino acid phosphorylation
8092177	-0.946584	0.51886	11.0792	-7.71329	2.41983e-07	4.88322e-05	7.18448	NCEH1	neutral cholesterol ester hydrolase 1	carboxylesterase activity /// endoplasmic reticulum /// microsome /// protein amino acid dephosphorylation /// xenobiotic metabolic process /// metabolic process /// membrane /// integral to membrane /// lipid catabolic process /// serine hydrolase activity /// phosphate binding
8092073	-0.94668	0.518825	9.12633	-7.64045	2.78645e-07	5.55572e-05	7.04694	EIF5A2	eukaryotic translation initiation factor 5A2	RNA binding /// translation elongation factor activity /// protein binding /// cellular_component /// nucleus /// nuclear pore /// cytoplasm /// endoplasmic reticulum /// endoplasmic reticulum membrane /// cytosol /// translation /// translational frameshifting /// spermatogenesis /// positive regulation of cell proliferation /// peptidyl-lysine modification to hypusine /// polyamine homeostasis …
8128329	-0.94863	0.518124	9.56893	-5.89852	1.00464e-05	0.000744824	3.53272	C6orf167	chromosome 6 open reading frame 167	protein binding
8018352	-0.953782	0.516277	8.3635	-5.90007	1.00125e-05	0.000744372	3.53604	SLC25A19	solute carrier family 25 (mitochondrial thiamine pyrophosphate carrier), member 19	transporter activity /// binding /// mitochondrion /// mitochondrial inner membrane /// membrane /// integral to membrane /// deoxynucleotide transmembrane transporter activity /// deoxynucleotide transport /// transmembrane transport /// transport
8097857	-0.956473	0.515315	9.02878	-7.44538	4.07988e-07	7.5054e-05	6.6748	MND1	meiotic nuclear divisions 1 homolog (S. cerevisiae)	DNA binding /// protein binding /// nucleus /// DNA recombination /// meiosis
7942527	-0.960197	0.513987	9.51127	-5.61648	1.862e-05	0.00115026	2.926	POLD3	polymerase (DNA-directed), delta 3, accessory subunit	DNA synthesis involved in DNA repair /// DNA-directed DNA polymerase activity /// protein binding /// nucleus /// nucleoplasm /// DNA-dependent DNA replication /// nucleotide-excision repair, DNA gap filling /// mismatch repair /// transferase activity /// nucleotidyltransferase activity /// delta DNA polymerase complex /// DNA synthesis during DNA repair
7929438	-0.960693	0.51381	9.47731	-5.75989	1.35899e-05	0.000917048	3.23565	HELLS	helicase, lymphoid-specific	nucleotide binding /// chromosome, centromeric region /// urogenital system development /// DNA binding /// chromatin binding /// helicase activity /// ATP binding /// nucleus /// centromeric heterochromatin /// methylation-dependent chromatin silencing /// anti-apoptosis /// cell cycle /// mitosis /// multicellular organismal development /// maintenance of DNA methylation /// hydrolase activity …
7961365	-0.961855	0.513396	5.85784	-8.21063	9.41189e-08	2.39227e-05	8.10303	MANSC1	MANSC domain containing 1	membrane /// integral to membrane
8005171	-0.963062	0.512967	8.86371	-6.58446	2.33402e-06	0.000270787	4.96683	TRPV2	transient receptor potential cation channel, subfamily V, member 2	ion channel activity /// cation channel activity /// calcium channel activity /// intracellular /// cytoplasm /// plasma membrane /// integral to plasma membrane /// transport /// ion transport /// calcium ion transport /// sensory perception /// response to temperature stimulus /// response to heat /// ion transmembrane transporter activity /// melanosome /// calcium ion binding
8124391	-0.963735	0.512728	10.6328	-5.32633	3.54569e-05	0.00186496	2.29276	HIST1H2AB	histone cluster 1, H2ab	nucleosome /// DNA binding /// nucleus /// chromosome /// nucleosome assembly
7954559	-0.964888	0.512318	10.2028	-7.55175	3.31183e-07	6.37422e-05	6.87842	PPFIBP1	PTPRF interacting protein, binding protein 1 (liprin beta 1)	protein binding /// plasma membrane /// cell adhesion
8180362	-0.968109	0.511176	11.6327	-8.65651	4.1493e-08	1.29121e-05	8.89633	---	---	---
8099107	-0.968807	0.510928	10.3786	-4.75302	0.000129649	0.004818	1.01981	LYAR	Ly1 antibody reactive homolog (mouse)	protein binding /// nucleus /// nucleolus /// metal ion binding /// nucleolus /// zinc ion binding
8127502	-0.970733	0.510247	9.44654	-4.62721	0.000172907	0.0059785	0.737692	C6orf155	chromosome 6 open reading frame 155	---
8180363	-0.971531	0.509965	11.6316	-8.7555	3.47144e-08	1.15589e-05	9.06862	---	---	---
7906919	-0.971648	0.509923	9.98566	-4.71229	0.000142299	0.00515813	0.928564	RGS4	regulator of G-protein signaling 4	inactivation of MAPK activity /// signal transducer activity /// GTPase activator activity /// calmodulin binding /// regulation of G-protein coupled receptor protein signaling pathway /// negative regulation of signal transduction
7919751	-0.973578	0.509241	11.9722	-6.54293	2.54527e-06	0.000290239	4.88179	MCL1	myeloid cell leukemia sequence 1 (BCL2-related)	cell fate determination /// protein binding /// nucleus /// nucleoplasm /// cytoplasm /// mitochondrion /// mitochondrial outer membrane /// apoptosis /// anti-apoptosis /// multicellular organismal development /// protein channel activity /// membrane /// integral to membrane /// cellular homeostasis /// cell differentiation /// response to cytokine stimulus /// regulation of apoptosis /// prote…
7963009	-0.973912	0.509124	6.90123	-7.21483	6.44527e-07	0.000105718	6.22784	RHEBL1	Ras homolog enriched in brain like 1	nucleotide binding /// GTPase activity /// GTP binding /// intracellular /// cytoplasm /// plasma membrane /// signal transduction /// small GTPase mediated signal transduction /// TOR signaling pathway /// positive regulation of NF-kappaB transcription factor activity
7973067	-0.974996	0.508741	11.3316	-4.80624	0.000114817	0.0043692	1.13894	NP /// PNP	nucleoside phosphorylase /// purine nucleoside phosphorylase	nucleoside binding /// purine binding /// purine-nucleoside phosphorylase activity /// purine-nucleoside phosphorylase activity /// intracellular /// cytoplasm /// cytosol /// cytoskeleton /// nucleobase, nucleoside, nucleotide and nucleic acid metabolic process /// inosine catabolic process /// nicotinamide riboside catabolic process /// immune response /// drug binding /// nucleoside metabolic …
8091678	-0.978017	0.507677	9.66489	-4.95088	8.26172e-05	0.00346712	1.46184	VEPH1	ventricular zone expressed PH domain homolog 1 (zebrafish)	plasma membrane
7979281	-0.97809	0.507651	9.45845	-7.53118	3.44777e-07	6.59773e-05	6.83916	WDHD1	WD repeat and HMG-box DNA binding protein 1	DNA binding /// nucleus /// nucleoplasm /// nucleolus /// cytoplasm /// DNA binding /// nucleus /// nucleoplasm
8115664	-0.980965	0.506641	6.85636	-8.93358	2.52645e-08	9.2779e-06	9.37512	---	---	---
8129677	-0.982001	0.506277	9.19395	-6.18381	5.43499e-06	0.000488403	4.13665	SGK1	serum/glucocorticoid regulated kinase 1	nucleotide binding /// protein serine/threonine kinase activity /// protein binding /// ATP binding /// nucleus /// cytoplasm /// endoplasmic reticulum /// plasma membrane /// protein amino acid phosphorylation /// sodium ion transport /// apoptosis /// response to stress /// transferase activity /// protein serine/threonine kinase activity /// protein amino acid phosphorylation /// response to s…
7949264	-0.989324	0.503714	9.02194	-5.70534	1.5315e-05	0.000992105	3.11814	EHD1	EH-domain containing 1	nucleotide binding /// GTPase activity /// calcium ion binding /// protein binding /// ATP binding /// GTP binding /// lipid particle /// plasma membrane /// endocytosis /// positive regulation of cholesterol storage /// endosome transport /// endocytic vesicle /// platelet dense tubular network membrane /// early endosome membrane /// low-density lipoprotein particle clearance /// cholesterol ho…
8024900	-0.990888	0.503168	10.1136	-8.24837	8.77272e-08	2.26306e-05	8.17128	UHRF1	ubiquitin-like with PHD and ring finger domains 1	transcription factor activity /// RNA polymerase II transcription factor activity /// protein binding /// nucleus /// DNA repair /// regulation of transcription from RNA polymerase II promoter /// cell cycle /// zinc ion binding /// cell proliferation /// ligase activity /// regulation of transcription /// metal ion binding /// response to DNA damage stimulus /// modification-dependent protein ca…
7954589	-0.991192	0.503062	6.60372	-6.2228	5.00124e-06	0.000457683	4.21839	REP15	RAB15 effector protein	endosome /// membrane /// early endosome membrane
7915392	-0.991803	0.502849	7.5666	-6.90559	1.20366e-06	0.000164931	5.6163	HIVEP3	human immunodeficiency virus type I enhancer binding protein 3	DNA binding /// intracellular /// nucleus /// cytoplasm /// zinc ion binding /// transcription activator activity /// positive regulation of transcription /// metal ion binding
7902913	-0.995878	0.501431	8.61759	-7.52039	3.5213e-07	6.69993e-05	6.81857	CDC7	cell division cycle 7 homolog (S. cerevisiae)	G1/S transition of mitotic cell cycle /// nucleotide binding /// protein serine/threonine kinase activity /// protein binding /// ATP binding /// nucleus /// nucleoplasm /// cytoplasm /// DNA replication /// protein amino acid phosphorylation /// cell cycle /// positive regulation of cell proliferation /// kinase activity /// transferase activity /// regulation of S phase /// metal ion binding //…
8102389	-1.00065	0.499775	8.00907	-4.62504	0.000173771	0.00598352	0.732811	C4orf21	chromosome 4 open reading frame 21	zinc ion binding /// membrane /// integral to membrane
7958455	-1.00107	0.499629	9.52833	-5.57208	2.05364e-05	0.00122816	2.82967	UNG	uracil-DNA glycosylase	uracil DNA N-glycosylase activity /// protein binding /// nucleus /// mitochondrion /// DNA repair /// base-excision repair /// metabolic process /// somatic hypermutation of immunoglobulin genes /// somatic recombination of immunoglobulin gene segments /// hydrolase activity, hydrolyzing N-glycosyl compounds /// interspecies interaction between organisms /// base-excision repair /// response to …
7957298	-1.00152	0.499475	9.47082	-5.67258	1.6457e-05	0.00104375	3.04742	NAV3	neuron navigator 3	nucleotide binding /// ATP binding /// nucleus /// nuclear envelope /// nuclear outer membrane /// membrane /// nucleoside-triphosphatase activity
8099850	-1.00345	0.498807	8.91471	-5.09761	5.92698e-05	0.00272208	1.78793	TMEM156	transmembrane protein 156	membrane /// integral to membrane
8024843	-1.0097	0.496649	9.61446	-6.74244	1.68217e-06	0.00020978	5.28815	CHAF1A	chromatin assembly factor 1, subunit A (p150)	chromatin binding /// protein binding /// nucleus /// chromatin assembly complex /// DNA replication /// DNA repair /// DNA replication-dependent nucleosome assembly /// protein complex assembly /// cell cycle /// regulation of transcription /// unfolded protein binding /// chromo shadow domain binding /// response to DNA damage stimulus
7956261	-1.01306	0.495493	10.7479	-5.45497	2.66194e-05	0.00149216	2.57458	RBMS2	RNA binding motif, single stranded interacting protein 2	nucleotide binding /// RNA binding /// nucleus /// RNA processing /// RNA binding
7932796	-1.0171	0.49411	7.69886	-6.90004	1.21737e-06	0.000166126	5.6052	SVIL	supervillin	podosome /// nucleus /// cytoplasm /// plasma membrane /// cytoskeleton organization /// skeletal muscle tissue development /// actin cytoskeleton /// cell projection /// costamere /// actin filament binding /// calcium ion binding
7956759	-1.02027	0.493024	10.2359	-6.26255	4.59554e-06	0.000430354	4.30151	SRGAP1	SLIT-ROBO Rho GTPase activating protein 1	GTPase activator activity /// protein binding /// intracellular /// signal transduction
8096050	-1.02365	0.491871	8.97869	-4.66155	0.000159823	0.00565527	0.814766	FGF5	fibroblast growth factor 5	fibroblast growth factor receptor binding /// extracellular region /// extracellular space /// cell-cell signaling /// nervous system development /// growth factor activity /// cell proliferation /// positive regulation of cell proliferation /// positive regulation of cell proliferation /// fibroblast growth factor receptor signaling pathway /// fibroblast growth factor receptor signaling pathway…
8122202	-1.02676	0.490811	6.50246	-5.56275	2.0964e-05	0.00124872	2.8094	MYB	v-myb myeloblastosis viral oncogene homolog (avian)	DNA binding /// protein binding /// nucleus /// regulation of transcription, DNA-dependent /// nuclear matrix /// transcription activator activity
7917182	-1.0319	0.489065	11.0577	-5.17446	4.98453e-05	0.00239488	1.95804	ELTD1	EGF, latrophilin and seven transmembrane domain containing 1	G-protein coupled receptor activity /// calcium ion binding /// plasma membrane /// signal transduction /// G-protein coupled receptor protein signaling pathway /// neuropeptide signaling pathway /// integral to membrane /// protein dimerization activity /// G-protein coupled receptor activity /// integral to membrane
8021376	-1.03284	0.488748	11.5135	-10.5813	1.59915e-09	1.15754e-06	12.0095	NEDD4L	neural precursor cell expressed, developmentally down-regulated 4-like	ubiquitin-protein ligase activity /// protein binding /// intracellular /// cytoplasm /// protein modification process /// sodium ion transport /// cellular sodium ion homeostasis /// excretion /// response to metal ion /// protein ubiquitination /// ligase activity /// acid-amino acid ligase activity /// sodium channel regulator activity /// water homeostasis /// regulation of protein catabolic …
8130374	-1.04088	0.48603	11.3293	-4.46475	0.000251122	0.00780728	0.372484	FBXO5	F-box protein 5	mitotic metaphase /// oocyte maturation /// protein binding /// nucleus /// nucleoplasm /// cytoplasm /// spindle /// cytosol /// cytoskeleton /// cell cycle /// spindle assembly involved in female meiosis I /// regulation of mitotic cell cycle /// vesicle organization /// regulation of meiosis /// microtubule polymerization /// metal ion binding /// spindle assembly /// cell division /// negativ…
8015642	-1.04316	0.485264	9.07134	-6.33061	3.97779e-06	0.000387276	4.44334	MLX /// PSMC3IP	MAX-like protein X /// PSMC3 interacting protein	DNA binding /// transcription factor activity /// nucleus /// cytoplasm /// regulation of transcription, DNA-dependent /// nucleocytoplasmic transport /// transcription factor binding /// protein homodimerization activity /// negative regulation of transcription, DNA-dependent /// DNA binding /// cellular_component /// nucleus /// DNA recombination /// meiosis /// biological_process /// estrogen …
8115732	-1.04808	0.483612	8.60946	-6.49985	2.7853e-06	0.000306618	4.79332	LOC100133106	VCEW9374	---
7957665	-1.05165	0.482417	10.0758	-7.00786	9.77628e-07	0.000142772	5.82007	ELK3	ELK3, ETS-domain protein (SRF accessory protein 2)	angiogenesis /// transcription factor activity /// transcription corepressor activity /// protein binding /// nucleus /// nucleus /// nucleolus /// mitochondrion /// regulation of transcription, DNA-dependent /// signal transduction /// negative regulation of transcription /// purine-rich negative regulatory element binding /// wound healing /// intracellular membrane-bounded organelle /// transc…
8092594	-1.05462	0.481425	6.10843	-5.30845	3.69031e-05	0.00191098	2.25347	---	---	---
8165735	-1.05537	0.481173	9.11537	-6.94158	1.11853e-06	0.000155831	5.68818	CSF2RA	colony stimulating factor 2 receptor, alpha, low-affinity (granulocyte-macrophage)	receptor activity /// cytokine receptor activity /// protein binding /// extracellular region /// plasma membrane /// integral to plasma membrane /// receptor activity
8176306	-1.05537	0.481173	9.11537	-6.94158	1.11853e-06	0.000155831	5.68818	CSF2RA	colony stimulating factor 2 receptor, alpha, low-affinity (granulocyte-macrophage)	receptor activity /// cytokine receptor activity /// protein binding /// extracellular region /// plasma membrane /// integral to plasma membrane /// receptor activity
8126798	-1.05655	0.480779	6.61386	-7.78639	2.10188e-07	4.51525e-05	7.32175	GPR116	G protein-coupled receptor 116	G-protein coupled receptor activity /// plasma membrane /// signal transduction /// G-protein coupled receptor protein signaling pathway /// neuropeptide signaling pathway /// integral to membrane /// G-protein coupled receptor activity /// integral to membrane
7944722	-1.05739	0.480499	10.061	-10.2132	2.88341e-09	1.77794e-06	11.4515	UBASH3B /// UBASH3B	ubiquitin associated and SH3 domain containing, B /// ubiquitin associated and SH3 domain containing B	nucleus /// cytoplasm
8082314	-1.05983	0.479687	10.6117	-6.36926	3.66567e-06	0.000365436	4.52361	PLXNA1	plexin A1	receptor activity /// protein binding /// cellular_component /// intracellular /// membrane fraction /// plasma membrane /// signal transduction /// multicellular organismal development /// integral to membrane /// semaphorin receptor activity /// membrane
7975136	-1.0663	0.477543	11.0175	-9.96576	4.32225e-09	2.24872e-06	11.0667	FUT8	fucosyltransferase 8 (alpha (1,6) fucosyltransferase)	in utero embryonic development /// Golgi apparatus /// protein amino acid N-linked glycosylation /// N-glycan processing /// transforming growth factor beta receptor signaling pathway /// integrin-mediated signaling pathway /// respiratory gaseous exchange /// glycoprotein 6-alpha-L-fucosyltransferase activity /// oligosaccharide biosynthetic process /// membrane /// integral to membrane /// cell…
7944913	-1.06723	0.477235	8.63124	-4.60391	0.000182401	0.00619971	0.685351	CCDC15	coiled-coil domain containing 15	---
7991777	-1.07107	0.475967	9.88807	-5.37735	3.16394e-05	0.00170745	2.40473	C4orf46	chromosome 4 open reading frame 46	---
8080994	-1.0763	0.474242	5.18003	-4.835	0.000107529	0.00415379	1.20325	LOC285299 /// LOC651959 /// FRG2C	FSHD region gene 2 family, member C-like /// FSHD region gene 2-like /// FSHD region gene 2 family, member C	nucleus
7982792	-1.07818	0.473627	9.36623	-9.56111	8.50637e-09	3.87995e-06	10.4205	RAD51	RAD51 homolog (RecA homolog, E. coli) (S. cerevisiae)	nucleotide binding /// double-strand break repair via homologous recombination /// double-strand break repair via homologous recombination /// condensed chromosome /// condensed nuclear chromosome /// damaged DNA binding /// double-stranded DNA binding /// single-stranded DNA binding /// protein binding /// protein binding /// ATP binding /// nucleus /// nucleus /// nucleoplasm /// DNA unwinding …
8016438	-1.07996	0.473043	9.93264	-13.1625	3.74579e-11	1.13385e-07	15.4885	HOXB2	homeobox B2	morphogenesis of an epithelial sheet /// transcription factor activity /// nucleus /// regulation of transcription, DNA-dependent /// multicellular organismal development /// blood circulation /// anterior/posterior pattern formation /// dorsal/ventral pattern formation /// rhombomere 3 development /// rhombomere 4 development /// facial nerve structural organization /// sequence-specific DNA bin…
8111101	-1.08363	0.471842	10.0275	-10.0707	3.63713e-09	1.92231e-06	11.2309	ANKH	ankylosis, progressive homolog (mouse)	skeletal system development /// inorganic phosphate transmembrane transporter activity /// integral to plasma membrane /// transport /// phosphate transport /// locomotory behavior /// integral to membrane /// outer membrane /// outer membrane /// regulation of bone mineralization /// regulation of bone mineralization /// inorganic diphosphate transmembrane transporter activity
8130598	-1.0844	0.471588	7.39995	-6.46317	3.00801e-06	0.000321019	4.71779	LPAL2	lipoprotein, Lp(a)-like 2 pseudogene	molecular_function /// cellular_component /// extracellular region /// biological_process
7946292	-1.08494	0.471412	7.3415	-4.48278	0.000240919	0.00760367	0.413048	CYB5R2	cytochrome b5 reductase 2	cytochrome-b5 reductase activity /// soluble fraction /// membrane /// sterol biosynthetic process /// oxidoreductase activity /// oxidation reduction /// electron carrier activity
8157153	-1.08887	0.470131	9.07132	-9.78815	5.80433e-09	2.88458e-06	10.7857	AKAP2 /// PALM2-AKAP2 /// PALM2	A kinase (PRKA) anchor protein 2 /// PALM2-AKAP2 readthrough /// paralemmin 2	protein binding /// enzyme binding /// plasma membrane /// regulation of cell shape
8131803	-1.08899	0.470092	6.62515	-4.91924	8.87737e-05	0.00364077	1.3913	IL6	interleukin 6 (interferon, beta 2)	neutrophil apoptosis /// hepatic immune response /// hepatic immune response /// neutrophil mediated immunity /// monocyte chemotaxis /// positive regulation of acute inflammatory response /// positive regulation of leukocyte chemotaxis /// cytokine activity /// cytokine activity /// interleukin-6 receptor binding /// interleukin-6 receptor binding /// extracellular region /// extracellular space…
8139632	-1.09	0.469763	8.6081	-6.33722	3.92251e-06	0.000384141	4.45709	FIGNL1	fidgetin-like 1	nucleotide binding /// magnesium ion binding /// ATP binding /// hydrolase activity /// nucleoside-triphosphatase activity /// ATP metabolic process
8140668	-1.09411	0.468425	9.59853	-7.21166	6.48617e-07	0.000105868	6.22166	SEMA3A	sema domain, immunoglobulin domain (Ig), short basic domain, secreted, (semaphorin) 3A	regulation of heart rate /// receptor activity /// extracellular region /// apoptosis /// multicellular organismal development /// nervous system development /// axon guidance /// axonal fasciculation /// membrane /// cell differentiation /// axon /// dendrite /// chemorepellent activity /// regulation of axon extension involved in axon guidance /// negative regulation of axon extension involved …
8028286	-1.09645	0.467667	9.64712	-4.82182	0.000110809	0.00424581	1.17378	SIPA1L3	signal-induced proliferation-associated 1 like 3	GTPase activator activity /// protein binding /// intracellular /// regulation of small GTPase mediated signal transduction
8180257	-1.09731	0.467388	11.4317	-5.28953	3.84996e-05	0.00196953	2.21184	---	---	---
8073766	-1.09802	0.467158	6.59329	-6.35222	3.80002e-06	0.000375517	4.48825	RIBC2	RIB43A domain with coiled-coils 2	---
7949532	-1.09825	0.467083	11.186	-5.81334	1.20923e-05	0.000855098	3.35047	FOSL1	FOS-like antigen 1	transcription factor activity /// protein binding /// nucleus /// microsome /// cytosol /// regulation of transcription from RNA polymerase II promoter /// transcription from RNA polymerase II promoter /// chemotaxis /// cellular defense response /// female pregnancy /// learning /// positive regulation of cell proliferation /// negative regulation of cell proliferation /// response to mechanical…
7989915	-1.09888	0.466877	10.4828	-5.82879	1.16916e-05	0.000833608	3.3836	TIPIN	TIMELESS interacting protein	DNA replication checkpoint /// nuclear chromatin /// protein binding /// nucleus /// cytoplasm /// response to DNA damage stimulus /// cell cycle /// mitosis /// positive regulation of cell proliferation /// intra-S DNA damage checkpoint /// regulation of S phase /// regulation of DNA replication during S phase /// replication fork protection /// cell division
7933469	-1.10231	0.465771	7.91787	-9.18421	1.62626e-08	6.60362e-06	9.79906	ARHGAP22	Rho GTPase activating protein 22	angiogenesis /// GTPase activator activity /// intracellular /// nucleus /// cytoplasm /// signal transduction /// multicellular organismal development /// cell differentiation /// regulation of transcription
8112615	-1.10975	0.463373	8.38829	-5.35498	3.32589e-05	0.00177756	2.35566	ENC1 /// ENC1	ectodermal-neural cortex (with BTB-like domain) /// ectodermal-neural cortex 1 (with BTB-like domain)	actin binding /// protein binding /// nucleus /// cytoplasm /// cytoskeleton /// multicellular organismal development /// nervous system development /// nuclear matrix /// nucleus /// multicellular organismal development /// modification-dependent protein catabolic process
8115490	-1.11215	0.462603	10.0115	-8.14349	1.06712e-07	2.63198e-05	7.98111	ADAM19	ADAM metallopeptidase domain 19 (meltrin beta)	metalloendopeptidase activity /// proteolysis /// peptidase activity /// zinc ion binding /// membrane /// integral to membrane /// SH3 domain binding /// metal ion binding
8140113	-1.11374	0.462094	8.054	-6.52712	2.63076e-06	0.000292965	4.84936	STX1A	syntaxin 1A (brain)	SNARE binding /// glycoprotein binding /// positive regulation of neurotransmitter secretion /// SNAP receptor activity /// protein binding /// extracellular region /// plasma membrane /// neurotransmitter transport /// intracellular protein transport /// synaptic transmission /// response to gravity /// integral to membrane /// synaptic vesicle docking during exocytosis /// myosin binding /// ca…
7929012	-1.11682	0.461109	9.60665	-8.30463	7.90242e-08	2.08831e-05	8.27263	STAMBPL1	STAM binding protein-like 1	ubiquitin thiolesterase activity /// peptidase activity /// metallopeptidase activity /// metal ion binding /// zinc ion binding /// modification-dependent protein catabolic process
7981525	-1.12254	0.459284	10.2318	-5.40587	2.96911e-05	0.00162603	2.46721	CDCA4	cell division cycle associated 4	nucleus
8046488	-1.12869	0.45733	9.29305	-4.41111	0.000284129	0.00846213	0.251758	CDCA7	cell division cycle associated 7	nucleus /// regulation of cell proliferation /// regulation of transcription
8164217	-1.13209	0.456254	10.0017	-7.36967	4.73719e-07	8.30181e-05	6.52887	FAM129B	family with sequence similarity 129, member B	---
8161964	-1.13631	0.454923	8.48705	-4.65429	0.000162503	0.0057137	0.798475	FRMD3	FERM domain containing 3	binding /// cytoplasm /// cytoskeleton /// cytoskeletal protein binding /// membrane /// integral to membrane /// extrinsic to membrane
8046380	-1.13673	0.454789	12.0114	-8.61117	4.50447e-08	1.38875e-05	8.81693	ITGA6	integrin, alpha 6	receptor activity /// integrin binding /// protein binding /// plasma membrane /// cell-cell adherens junction /// cell-substrate junction assembly /// cell-matrix adhesion /// integrin-mediated signaling pathway /// integrin complex /// external side of plasma membrane /// integral to membrane /// basolateral plasma membrane /// positive regulation of cell-cell adhesion /// hemidesmosome assembl…
8142981	-1.13782	0.454445	11.7962	-13.5002	2.39507e-11	7.97488e-08	15.8929	PODXL	podocalyxin-like	protein binding /// plasma membrane /// integral to plasma membrane /// negative regulation of cell adhesion /// leukocyte migration /// membrane
8133788	-1.14161	0.453255	10.6377	-11.2625	5.57917e-10	5.8053e-07	12.9992	PTPN12	protein tyrosine phosphatase, non-receptor type 12	non-membrane spanning protein tyrosine phosphatase activity /// protein binding /// soluble fraction /// cytoplasm /// cytosol /// protein amino acid dephosphorylation /// hydrolase activity /// SH3 domain binding /// cytoplasm /// protein amino acid dephosphorylation
8152617	-1.14171	0.453221	6.20449	-7.77562	2.14588e-07	4.55105e-05	7.30156	HAS2	hyaluronan synthase 2	integral to plasma membrane /// membrane /// integral to membrane /// hyaluronan synthase activity /// transferase activity, transferring glycosyl groups
7984475	-1.14302	0.452811	7.75972	-5.43926	2.75655e-05	0.00153744	2.54024	CORO2B	coronin, actin binding protein, 2B	actin binding /// cytoplasm /// actin cytoskeleton /// membrane /// actin cytoskeleton organization
8112592	-1.14377	0.452577	9.82625	-5.4603	2.63063e-05	0.0014771	2.58621	FOXD1	forkhead box D1	DNA binding /// transcription factor activity /// nucleus /// regulation of transcription, DNA-dependent /// DNA bending activity /// positive regulation of gene expression /// positive regulation of BMP signaling pathway /// negative regulation of gene-specific transcription /// sequence-specific DNA binding /// dichotomous subdivision of terminal units involved in ureteric bud branching /// pos…
7954469	-1.14737	0.451446	9.70214	-8.08589	1.18906e-07	2.80795e-05	7.876	RASSF8	Ras association (RalGDS/AF-6) domain family (N-terminal) member 8	signal transduction
8063923	-1.14932	0.450838	9.82161	-10.9128	9.52197e-10	7.92633e-07	12.498	SLCO4A1	solute carrier organic anion transporter family, member 4A1	transporter activity /// ion transport /// membrane /// integral to membrane /// thyroid hormone transmembrane transporter activity /// thyroid hormone metabolic process
7928069	-1.14985	0.450671	8.48202	-7.29268	5.51869e-07	9.28059e-05	6.37963	COL13A1	collagen, type XIII, alpha 1	morphogenesis of a branching structure /// endochondral ossification /// extracellular matrix structural constituent /// protein binding /// collagen type XIII /// plasma membrane /// cell-matrix adhesion /// multicellular organismal development /// heparin binding /// integral to membrane /// cell-cell adhesion /// cell differentiation /// plasma membrane /// biological_process
7914648	-1.15421	0.449311	9.04377	-4.69373	0.000148471	0.00535025	0.886955	PHC2	polyhomeotic homolog 2 (Drosophila)	DNA binding /// protein binding /// nucleus /// multicellular organismal development /// zinc ion binding /// identical protein binding /// metal ion binding
7923991	-1.15849	0.44798	8.14946	-5.17163	5.01633e-05	0.00240329	1.9518	PLXNA2	plexin A2	receptor activity /// intracellular /// plasma membrane /// signal transduction /// cell surface receptor linked signaling pathway /// multicellular organismal development /// integral to membrane /// semaphorin receptor activity /// granule cell precursor tangential migration /// centrosome localization /// membrane
7932132	-1.16105	0.447186	8.71028	-8.16289	1.02902e-07	2.57619e-05	8.01642	FRMD4A	FERM domain containing 4A	binding /// cytoplasm /// cytoskeleton
7941236	-1.16227	0.446809	9.2171	-7.62639	2.86359e-07	5.67552e-05	7.02031	CDC42EP2	CDC42 effector protein (Rho GTPase binding) 2	opioid peptide activity /// Rho GTPase activator activity /// protein binding /// cytoplasm /// cytoskeleton /// plasma membrane /// actin filament organization /// regulation of cell shape /// endomembrane system /// membrane /// GTP-Rho binding /// actin cytoskeleton organization /// positive regulation of actin filament polymerization /// positive regulation of pseudopodium assembly /// positi…
7917649	-1.1652	0.445904	8.09834	-4.58535	0.000190335	0.00637583	0.643665	TGFBR3	transforming growth factor, beta receptor III	epithelial to mesenchymal transition /// liver development /// heart morphogenesis /// transforming growth factor beta receptor activity /// type II transforming growth factor beta receptor binding /// transforming growth factor beta receptor binding /// protein binding /// glycosaminoglycan binding /// glycosaminoglycan binding /// extracellular region /// extracellular space /// plasma membrane…
8006187	-1.16759	0.445163	8.66446	-8.46381	5.89295e-08	1.72778e-05	8.55695	ATAD5	ATPase family, AAA domain containing 5	nucleotide binding /// ATP binding /// nucleus /// response to DNA damage stimulus /// nucleoside-triphosphatase activity
8091422	-1.16827	0.444953	11.4727	-6.53076	2.6108e-06	0.0002927	4.85684	WWTR1	WW domain containing transcription regulator 1	negative regulation of transcription from RNA polymerase II promoter /// osteoblast differentiation /// transcription coactivator activity /// transcription corepressor activity /// protein binding /// nucleus /// nucleus /// transcription factor complex /// nucleolus /// cytoplasm /// regulation of transcription, DNA-dependent /// transcription regulator activity /// glomerulus development /// p…
8060758	-1.16857	0.444863	12.3216	-8.88142	2.77174e-08	1.00316e-05	9.2858	PRNP	prion protein	copper ion binding /// protein binding /// cytoplasm /// endoplasmic reticulum /// Golgi apparatus /// plasma membrane /// cellular copper ion homeostasis /// anti-apoptosis /// response to oxidative stress /// microtubule binding /// metabolic process /// tubulin binding /// extrinsic to membrane /// anchored to membrane /// identical protein binding /// membrane raft /// response to cadmium ion…
8017651	-1.18223	0.44067	11.4432	-11.0294	7.95684e-10	7.69219e-07	12.6666	SMURF2	SMAD specific E3 ubiquitin protein ligase 2	ubiquitin ligase complex /// ubiquitin-protein ligase activity /// protein binding /// intracellular /// nucleus /// cytoplasm /// plasma membrane /// protein modification process /// ubiquitin-dependent protein catabolic process /// negative regulation of transcription /// ligase activity /// acid-amino acid ligase activity /// regulation of transforming growth factor beta receptor signaling pat…
8015210	-1.18483	0.439876	10.0396	-4.46612	0.000250331	0.00780347	0.375567	KRTAP2-2 /// KRTAP2-4 /// LOC730755 /// KRTAP2-1	keratin associated protein 2-2 /// keratin associated protein 2-4 /// keratin associated protein 2-4-like /// keratin associated protein 2-1	keratin filament
8019576	-1.18483	0.439876	10.0396	-4.46612	0.000250331	0.00780347	0.375567	KRTAP2-2 /// KRTAP2-4 /// LOC730755 /// KRTAP2-1	keratin associated protein 2-2 /// keratin associated protein 2-4 /// keratin associated protein 2-4-like /// keratin associated protein 2-1	keratin filament
7928705	-1.18646	0.43938	10.3625	-12.8181	5.96756e-11	1.2882e-07	15.0649	TSPAN14	tetraspanin 14	membrane /// integral to membrane
8151512	-1.18701	0.439212	7.9353	-6.98804	1.01772e-06	0.000146065	5.7807	PAG1	phosphoprotein associated with glycosphingolipid microdomains 1	SH3/SH2 adaptor activity /// protein binding /// plasma membrane /// plasma membrane /// immune response /// signal transduction /// integral to membrane /// SH2 domain binding /// membrane raft /// regulation of T cell activation /// negative regulation of T cell activation /// intracellular signaling cascade
8120165	-1.19062	0.438114	8.51394	-5.78563	1.28462e-05	0.00088316	3.291	CENPQ	centromere protein Q	chromosome, centromeric region /// nucleus /// chromosome
8114805	-1.19069	0.438093	7.92281	-5.48204	2.50665e-05	0.00143409	2.63367	FGF1	fibroblast growth factor 1 (acidic)	angiogenesis /// induction of an organ /// fibroblast growth factor receptor binding /// protein binding /// extracellular region /// extracellular region /// proteinaceous extracellular matrix /// extracellular space /// nucleus /// nucleolus /// cytoplasm /// cytosol /// signal transduction /// intracellular protein kinase cascade /// multicellular organismal development /// nervous system deve…
8002778	-1.19424	0.437017	9.64235	-8.54937	5.04001e-08	1.52561e-05	8.70828	MLKL	mixed lineage kinase domain-like	protein tyrosine kinase activity /// protein binding /// ATP binding /// protein amino acid phosphorylation
8055350	-1.1956	0.436604	7.40134	-6.87646	1.27746e-06	0.000171852	5.55798	TMEM163	transmembrane protein 163	membrane /// integral to membrane
8054712	-1.19934	0.435475	8.72222	-4.79476	0.000117864	0.00446474	1.11325	IL1A	interleukin 1, alpha	fever /// cytokine activity /// interleukin-1 receptor binding /// copper ion binding /// protein binding /// extracellular region /// extracellular space /// extracellular space /// cytosol /// apoptosis /// anti-apoptosis /// inflammatory response /// immune response /// cell proliferation /// negative regulation of cell proliferation /// positive regulation vascular endothelial growth factor p…
8145291	-1.21302	0.431364	10.2488	-6.53824	2.57033e-06	0.00029104	4.87217	SLC25A37	solute carrier family 25, member 37	iron ion transmembrane transporter activity /// binding /// mitochondrion /// mitochondrial inner membrane /// ion transport /// membrane /// integral to membrane /// mitochondrial iron ion transport /// transmembrane transport /// iron ion binding /// iron ion transport
8127534	-1.2197	0.429372	8.9359	-5.60299	1.91819e-05	0.00118022	2.89676	C6orf150	chromosome 6 open reading frame 150	---
7993889	-1.22012	0.429248	10.2705	-8.31029	7.81996e-08	2.08305e-05	8.2828	C16orf52	chromosome 16 open reading frame 52	---
8059580	-1.222	0.428689	9.71475	-8.46173	5.91546e-08	1.72778e-05	8.55326	DNER	delta/notch-like EGF repeat containing	neuron migration /// transmembrane receptor activity /// Notch binding /// calcium ion binding /// protein binding /// early endosome /// plasma membrane /// endocytosis /// Notch receptor processing /// synapse assembly /// central nervous system development /// glial cell differentiation /// integral to membrane /// clathrin binding /// dendrite /// neuronal cell body /// skeletal muscle fiber …
7894553	-1.22897	0.426623	5.20712	-5.98323	8.3623e-06	0.000652083	3.71312	---	---	---
8082846	-1.22992	0.426342	7.98853	-9.01278	2.19628e-08	8.31016e-06	9.51002	EPHB1	EPH receptor B1	nucleotide binding /// transmembrane receptor protein tyrosine kinase activity /// receptor activity /// ephrin receptor activity /// protein binding /// ATP binding /// cytoplasm /// plasma membrane /// integral to plasma membrane /// protein amino acid phosphorylation /// signal transduction /// transmembrane receptor protein tyrosine kinase signaling pathway /// cell-cell signaling /// nervous…
8096032	-1.23879	0.423726	9.42171	-5.16946	5.04091e-05	0.0024116	1.94699	PRDM8	PR domain containing 8	DNA binding /// intracellular /// nucleus /// zinc ion binding /// neurogenesis /// regulation of transcription /// metal ion binding
7956867	-1.23905	0.423652	10.1815	-10.4527	1.96147e-09	1.36065e-06	11.8165	HMGA2	high mobility group AT-hook 2	chromatin /// DNA binding /// AT DNA binding /// protein binding /// nucleus /// chromosome /// chromatin organization /// regulation of transcription, DNA-dependent /// cell cycle /// mitosis /// multicellular organismal development /// regulation of growth /// cell division /// nuclear chromosome /// regulation of transcription, DNA-dependent
7948229	-1.24974	0.420523	11.799	-5.15885	5.16268e-05	0.00244581	1.92354	SLC43A3	solute carrier family 43, member 3	membrane /// integral to membrane /// transmembrane transport
8065569	-1.25157	0.419992	10.735	-9.57967	8.24288e-09	3.82136e-06	10.4506	BCL2L1	BCL2-like 1	ovarian follicle development /// response to hypoxia /// in utero embryonic development /// release of cytochrome c from mitochondria /// protein binding /// intracellular /// nucleus /// mitochondrion /// mitochondrial outer membrane /// mitochondrial outer membrane /// cytosol /// anti-apoptosis /// response to oxidative stress /// germ cell development /// spermatogenesis /// positive regulati…
8081620	-1.25242	0.419745	7.95548	-4.85422	0.000102924	0.00406076	1.24619	TAGLN3	transgelin 3	central nervous system development /// muscle organ development
8052689	-1.25421	0.419224	9.74932	-6.99104	1.01155e-06	0.000145846	5.78666	SPRED2	sprouty-related, EVH1 domain containing 2	inactivation of MAPK activity /// stem cell factor receptor binding /// protein binding /// cytoplasm /// multicellular organismal development /// regulation of signal transduction /// membrane /// transport vesicle membrane /// cytoplasmic vesicle /// plasma membrane
8142997	-1.26983	0.414708	8.49735	-9.04293	2.08267e-08	8.06358e-06	9.56115	PLXNA4	plexin A4	receptor activity /// intracellular /// plasma membrane /// signal transduction /// multicellular organismal development /// nervous system development /// integral to membrane /// semaphorin receptor activity /// membrane
8051998	-1.27343	0.413676	11.3749	-6.76411	1.6087e-06	0.000205229	5.33195	MCFD2	multiple coagulation factor deficiency 2	calcium ion binding /// extracellular region /// endoplasmic reticulum /// ER-Golgi intermediate compartment /// Golgi apparatus /// protein transport /// vesicle-mediated transport /// carboxylic acid metabolic process
7995354	-1.2848	0.410429	9.0028	-5.57189	2.05449e-05	0.00122816	2.82926	ORC6L	origin recognition complex, subunit 6 like (yeast)	DNA binding /// protein binding /// nucleus /// nucleoplasm /// nuclear origin of replication recognition complex /// DNA replication /// DNA replication
7914851	-1.28646	0.409956	8.88914	-6.40166	3.42346e-06	0.000348596	4.59075	CLSPN	claspin homolog (Xenopus laevis)	DNA binding /// protein binding /// cellular_component /// nucleus /// nucleoplasm /// chromosome /// DNA replication /// DNA repair /// cell cycle /// biological_process /// protein binding /// response to DNA damage stimulus
8066848	-1.28652	0.409939	9.00312	-4.58883	0.00018882	0.00633212	0.651487	PREX1	phosphatidylinositol-3,4,5-trisphosphate-dependent Rac exchange factor 1	guanyl-nucleotide exchange factor activity /// Rho guanyl-nucleotide exchange factor activity /// Rho GTPase activator activity /// protein binding /// phospholipid binding /// intracellular /// cytoplasm /// cytosol /// cytosol /// plasma membrane /// superoxide metabolic process /// apoptosis /// induction of apoptosis by extracellular signals /// enzyme binding /// actin filament polymerizatio…
8130151	-1.29096	0.408678	7.40991	-7.74418	2.27978e-07	4.69145e-05	7.24259	RAET1E	retinoic acid early transcript 1E	protein binding /// plasma membrane /// immune response /// integral to membrane /// antigen processing and presentation /// MHC class I protein complex
8007931	-1.29126	0.408595	8.38466	-10.8532	1.04437e-09	8.2796e-07	12.4111	ITGB3	integrin, beta 3 (platelet glycoprotein IIIa, antigen CD61)	receptor activity /// integrin binding /// protein binding /// plasma membrane /// integral to plasma membrane /// cell-substrate junction assembly /// cell adhesion /// cell-matrix adhesion /// integrin-mediated signaling pathway /// blood coagulation /// integrin complex /// external side of plasma membrane /// negative regulation of macrophage derived foam cell differentiation /// negative reg…
8116418	-1.29184	0.408429	10.6758	-8.54109	5.11667e-08	1.53486e-05	8.69367	GFPT2	glutamine-fructose-6-phosphate transaminase 2	glutamine-fructose-6-phosphate transaminase (isomerizing) activity /// sugar binding /// cytoplasm /// fructose 6-phosphate metabolic process /// energy reserve metabolic process /// glutamine metabolic process /// metabolic process /// carbohydrate biosynthetic process /// transferase activity /// glutamine-fructose-6-phosphate transaminase (isomerizing) activity
7972487	-1.29205	0.408372	9.88401	-11.6556	3.10425e-10	4.13449e-07	13.5458	DOCK9	dedicator of cytokinesis 9	guanyl-nucleotide exchange factor activity /// Rho guanyl-nucleotide exchange factor activity /// cellular_component /// biological_process /// endomembrane system /// membrane /// Rho GTPase binding /// GTP binding /// GTPase binding
8152668	-1.29328	0.408021	9.22482	-7.97583	1.46392e-07	3.29399e-05	7.67384	ATAD2	ATPase family, AAA domain containing 2	nucleotide binding /// ATP binding /// nucleus /// hydrolase activity /// nucleoside-triphosphatase activity /// ATPase activity, uncoupled /// regulation of transcription /// transcription factor activity
8052872	-1.30026	0.406054	8.58649	-5.87935	1.04735e-05	0.000763523	3.49179	TGFA	transforming growth factor, alpha	activation of MAPK activity /// MAP kinase kinase activity /// signal transducer activity /// epidermal growth factor receptor binding /// protein binding /// extracellular region /// extracellular space /// plasma membrane /// growth factor activity /// cell proliferation /// cell surface /// integral to membrane /// positive regulation of epidermal growth factor receptor activity /// positive r…
8152582	-1.30864	0.403701	8.96581	-6.92896	1.14764e-06	0.000159221	5.663	DSCC1	defective in sister chromatid cohesion 1 homolog (S. cerevisiae)	chromosome, centromeric region /// chromatin /// DNA binding /// protein binding /// nucleus /// nucleoplasm /// DNA replication /// cell cycle /// maintenance of mitotic sister chromatid cohesion
8009243	-1.31326	0.402412	7.56613	-6.34562	3.85346e-06	0.000378492	4.47453	C17orf60	chromosome 17 open reading frame 60	membrane /// integral to membrane
7910997	-1.3246	0.399259	10.3126	-10.3056	2.48358e-09	1.62149e-06	11.593	EXO1	exonuclease 1	humoral immune response mediated by circulating immunoglobulin /// DNA binding /// endonuclease activity /// ribonuclease H activity /// exonuclease activity /// protein binding /// nucleus /// DNA repair /// mismatch repair /// mismatch repair /// mismatch repair /// mismatch repair /// DNA recombination /// immune response /// meiosis /// 5'-3' exonuclease activity /// somatic hypermutation of …
8129482	-1.32597	0.398881	6.25677	-4.56947	0.0001974	0.00655972	0.607983	SAMD3	sterile alpha motif domain containing 3	---
8057929	-1.32708	0.398574	6.4101	-5.96206	8.75404e-06	0.000672794	3.66811	---	---	---
8022747	-1.33983	0.395068	9.86343	-9.50796	9.31082e-09	4.13363e-06	10.334	B4GALT6	UDP-Gal:betaGlcNAc beta 1,4- galactosyltransferase, polypeptide 6	Golgi apparatus /// carbohydrate metabolic process /// galactosyltransferase activity /// UDP-galactose:glucosylceramide beta-1,4-galactosyltransferase activity /// membrane /// integral to membrane /// transferase activity, transferring glycosyl groups /// Golgi cisterna membrane /// metal ion binding /// magnesium ion binding /// calcium ion binding /// manganese ion binding
7989657	-1.34316	0.394155	9.61549	-7.74356	2.28253e-07	4.69145e-05	7.24141	LOC100128564 /// CSNK1G1	GKGM353 /// casein kinase 1, gamma 1	nucleotide binding /// protein serine/threonine kinase activity /// ATP binding /// cytoplasm /// protein amino acid phosphorylation /// Wnt receptor signaling pathway /// transferase activity
8028570	-1.34333	0.394111	7.74526	-10.9209	9.4033e-10	7.92633e-07	12.5098	PAPL	iron/zinc purple acid phosphatase-like protein	acid phosphatase activity /// extracellular region /// hydrolase activity /// metal ion binding /// iron ion binding /// zinc ion binding
8081233	-1.35022	0.392232	8.67446	-4.66109	0.000159992	0.00565527	0.81373	---	---	---
8144036	-1.35617	0.390618	10.4141	-6.08282	6.74753e-06	0.000564503	3.92404	XRCC2	X-ray repair complementing defective repair in Chinese hamster cells 2	double-strand break repair via homologous recombination /// in utero embryonic development /// DNA binding /// ATP binding /// nucleus /// DNA repair /// DNA recombination /// meiosis /// DNA-dependent ATPase activity /// response to X-ray /// response to gamma radiation /// negative regulation of neuron apoptosis /// positive regulation of neurogenesis /// DNA repair /// response to DNA damage s…
8037387	-1.3682	0.387375	7.63518	-7.64857	2.74285e-07	5.50174e-05	7.06232	---	---	---
7945245	-1.3682	0.387374	9.77967	-9.04527	2.07411e-08	8.06358e-06	9.56511	NTM	neurotrimin	protein binding /// plasma membrane /// cell adhesion /// neuron recognition /// anchored to membrane /// cell adhesion
8097098	-1.37649	0.385154	9.9516	-8.73258	3.61746e-08	1.18182e-05	9.02884	USP53	ubiquitin specific peptidase 53	ubiquitin thiolesterase activity /// cellular_component /// ubiquitin-dependent protein catabolic process /// biological_process
8063536	-1.39195	0.38105	8.4849	-7.71339	2.41937e-07	4.88322e-05	7.18467	TFAP2C	transcription factor AP-2 gamma (activating enhancer binding protein 2 gamma)	DNA binding /// transcription factor activity /// protein binding /// nucleus /// regulation of transcription from RNA polymerase II promoter /// cell-cell signaling /// cell differentiation /// protein dimerization activity /// transcription factor activity /// regulation of transcription from RNA polymerase II promoter
8162601	-1.39302	0.380767	8.9026	-11.4833	4.0065e-10	4.76386e-07	13.3083	ZNF367	zinc finger protein 367	transcription factor activity /// intracellular /// nucleus /// cytoplasm /// regulation of transcription from RNA polymerase II promoter /// zinc ion binding /// regulation of transcription /// metal ion binding
7935660	-1.3947	0.380325	10.0716	-12.5471	8.67114e-11	1.60402e-07	14.7232	DNMBP	dynamin binding protein	guanyl-nucleotide exchange factor activity /// Rho guanyl-nucleotide exchange factor activity /// protein binding /// intracellular /// cytoplasm /// Golgi apparatus /// Golgi stack /// cytoskeleton /// cell junction /// regulation of Rho protein signal transduction /// synapse /// protein binding /// intracellular signaling cascade
7990818	-1.40012	0.378897	6.78971	-4.96652	7.97369e-05	0.00339321	1.49667	BCL2A1	BCL2-related protein A1	protein binding /// cytoplasm /// anti-apoptosis /// regulation of apoptosis
7914878	-1.40074	0.378735	10.3301	-11.0006	8.31663e-10	7.69219e-07	12.6251	LOC100289612	arsenic transactivated protein 1	---
7917180	-1.40654	0.377216	4.91681	-5.10843	5.78404e-05	0.00268233	1.81191	---	---	---
8009353	-1.40769	0.376914	8.38795	-4.73414	0.000135365	0.0049859	0.977521	PITPNC1	phosphatidylinositol transfer protein, cytoplasmic 1	protein binding /// intracellular /// cytoplasm /// lipid transport /// signal transduction /// lipid binding /// phosphatidylinositol transporter activity
7958749	-1.42291	0.37296	9.83315	-7.01189	9.69684e-07	0.000142236	5.82806	SH2B3	SH2B adaptor protein 3	signal transducer activity /// protein binding /// cell differentiation /// embryonic hemopoiesis /// intracellular signaling cascade
7983306	-1.43612	0.36956	10.4695	-5.93172	9.34837e-06	0.000707438	3.60353	WDR76	WD repeat domain 76	---
7939215	-1.44853	0.366395	10.1911	-6.8664	1.30402e-06	0.000173127	5.53781	C11orf41	chromosome 11 open reading frame 41	nucleus /// cytoplasm /// membrane /// integral to membrane /// intracellular membrane-bounded organelle
7958352	-1.46103	0.363233	7.89453	-5.04144	6.72912e-05	0.00298455	1.66328	BTBD11	BTB (POZ) domain containing 11	DNA binding /// protein binding /// membrane /// integral to membrane
7993588	-1.47217	0.36044	9.5182	-14.5489	6.31724e-12	4.2069e-08	17.0832	TMC7	transmembrane channel-like 7	membrane /// integral to membrane
8058273	-1.47244	0.360373	9.13517	-7.4834	3.78615e-07	7.1286e-05	6.74777	MPP4	membrane protein, palmitoylated 4 (MAGUK p55 subfamily member 4)	protein binding /// cytoplasm /// protein binding
7926259	-1.47533	0.359652	9.94165	-7.2507	5.99979e-07	9.88985e-05	6.2979	MCM10	minichromosome maintenance complex component 10	protein binding /// nucleus /// nucleoplasm /// DNA replication /// metal ion binding /// DNA replication /// zinc ion binding
7965357	-1.48102	0.358235	8.99874	-8.95217	2.44456e-08	9.14567e-06	9.40687	WDR51B /// POC1B /// GALNT4	WD repeat domain 51B /// POC1 centriolar protein homolog B (Chlamydomonas) /// UDP-N-acetyl-alpha-D-galactosamine:polypeptide N-acetylgalactosaminyltransferase 4 (GalNAc-T4)	Golgi membrane /// polypeptide N-acetylgalactosaminyltransferase activity /// sugar binding /// Golgi apparatus /// carbohydrate metabolic process /// membrane /// integral to membrane /// transferase activity, transferring glycosyl groups /// perinuclear region of cytoplasm
7982564	-1.48557	0.357107	10.0229	-12.1733	1.46703e-10	2.32608e-07	14.2398	SPRED1	sprouty-related, EVH1 domain containing 1	inactivation of MAPK activity /// stem cell factor receptor binding /// protein binding /// nucleus /// plasma membrane /// caveola /// multicellular organismal development /// regulation of signal transduction
8007071	-1.48979	0.356065	10.263	-8.12323	1.10846e-07	2.67452e-05	7.9442	CDC6	cell division cycle 6 homolog (S. cerevisiae)	DNA replication checkpoint /// regulation of cyclin-dependent protein kinase activity /// nucleotide binding /// chromatin binding /// protein binding /// ATP binding /// nucleus /// nucleoplasm /// cytoplasm /// spindle /// cytosol /// DNA replication /// cell cycle /// mitosis /// traversing start control point of mitotic cell cycle /// negative regulation of DNA replication /// negative regula…
7910022	-1.49248	0.355401	8.61859	-5.2521	4.18676e-05	0.00210584	2.12942	CNIH3	cornichon homolog 3 (Drosophila)	membrane /// integral to membrane /// intracellular signaling cascade
8086530	-1.50535	0.352245	11.171	-6.74282	1.68088e-06	0.00020978	5.28891	TMEM158	transmembrane protein 158 (gene/pseudogene)	membrane /// integral to membrane
8078350	-1.52066	0.348526	10.9959	-10.9155	9.48228e-10	7.92633e-07	12.5019	TGFBR2	transforming growth factor, beta receptor II (70/80kDa)	nucleotide binding /// blood vessel development /// patterning of blood vessels /// vasculogenesis /// positive regulation of mesenchymal cell proliferation /// positive regulation of tolerance induction to self antigen /// positive regulation of B cell tolerance induction /// positive regulation of T cell tolerance induction /// transmembrane receptor protein serine/threonine kinase activity ///…
8154233	-1.5211	0.34842	8.64554	-4.97265	7.86361e-05	0.00335685	1.51031	CD274	CD274 molecule	receptor activity /// protein binding /// plasma membrane /// immune response /// signal transduction /// cell surface receptor linked signaling pathway /// cell proliferation /// external side of plasma membrane /// endomembrane system /// integral to membrane /// negative regulation of T cell proliferation /// plasma membrane /// cell surface receptor linked signal transduction
8174598	-1.52461	0.347573	6.43638	-6.99091	1.01182e-06	0.000145846	5.7864	IL13RA2	interleukin 13 receptor, alpha 2	signal transducer activity /// receptor activity /// cytokine receptor activity /// extracellular space /// soluble fraction /// membrane /// integral to membrane
8037374	-1.54758	0.342083	10.631	-10.2684	2.63697e-09	1.68852e-06	11.5362	PLAUR	plasminogen activator, urokinase receptor	receptor activity /// protein binding /// extracellular region /// plasma membrane /// cellular component movement /// chemotaxis /// signal transduction /// blood coagulation /// cell surface /// integral to membrane /// attachment of GPI anchor to protein /// extrinsic to membrane /// enzyme binding /// regulation of proteolysis /// U-plasminogen activator receptor activity /// anchored to memb…
7930413	-1.55587	0.340124	10.2821	-9.57822	8.26314e-09	3.82136e-06	10.4482	DUSP5	dual specificity phosphatase 5	protein tyrosine phosphatase activity /// nucleus /// protein amino acid dephosphorylation /// hydrolase activity /// MAP kinase tyrosine/serine/threonine phosphatase activity /// protein tyrosine phosphatase activity /// protein amino acid dephosphorylation
8043909	-1.55849	0.339506	11.0994	-6.91208	1.18784e-06	0.000163436	5.62926	NPAS2	neuronal PAS domain protein 2	DNA binding /// transcription factor activity /// signal transducer activity /// nucleus /// transcription factor complex /// regulation of transcription, DNA-dependent /// signal transduction /// central nervous system development /// circadian sleep/wake cycle /// locomotor rhythm /// positive regulation of transcription from RNA polymerase II promoter /// rhythmic process /// Hsp90 protein bin…
7939237	-1.56866	0.337121	8.38395	-12.7804	6.28385e-11	1.2882e-07	15.0177	C11orf41	chromosome 11 open reading frame 41	nucleus /// cytoplasm /// membrane /// integral to membrane /// intracellular membrane-bounded organelle
8142345	-1.56915	0.337007	10.0148	-10.2192	2.85548e-09	1.77794e-06	11.4607	DOCK4	dedicator of cytokinesis 4	guanyl-nucleotide exchange factor activity /// protein binding /// endomembrane system /// membrane /// SH3 domain binding /// PDZ domain binding /// Rac GTPase activator activity /// stereocilium /// stereocilium bundle /// Rac GTPase binding
8086880	-1.58552	0.333205	8.77796	-11.3442	4.93291e-10	5.29842e-07	13.1142	CDC25A	cell division cycle 25 homolog A (S. pombe)	regulation of cyclin-dependent protein kinase activity /// G1/S transition of mitotic cell cycle /// phosphoprotein phosphatase activity /// protein tyrosine phosphatase activity /// protein binding /// cellular_component /// intracellular /// nucleus /// nucleoplasm /// cytoplasm /// DNA replication /// protein amino acid dephosphorylation /// cell cycle /// mitosis /// cell proliferation /// hy…
8062782	-1.60441	0.32887	8.37798	-5.35248	3.34448e-05	0.00178464	2.35018	TOX2	TOX high mobility group box family member 2	DNA binding /// nucleus /// regulation of transcription
8113214	-1.61611	0.326213	10.0869	-10.0733	3.62209e-09	1.92231e-06	11.2348	GLRX	glutaredoxin (thioltransferase)	cytoplasm /// cytosol /// transport /// electron carrier activity /// protein disulfide oxidoreductase activity /// glutathione disulfide oxidoreductase activity /// electron transport chain /// cell redox homeostasis /// protein N-terminus binding
7964733	-1.61728	0.325949	5.6234	-6.57703	2.37044e-06	0.000273869	4.95164	RPSAP52	ribosomal protein SA pseudogene 52	---
7894151	-1.62945	0.323211	6.01214	-5.05244	6.5637e-05	0.00293358	1.68772	---	---	---
7933075	-1.63128	0.322801	9.36805	-9.67073	7.06758e-09	3.46072e-06	10.5977	FZD8	frizzled homolog 8 (Drosophila)	non-G-protein coupled 7TM receptor activity /// G-protein coupled receptor activity /// signal transduction /// G-protein coupled receptor protein signaling pathway /// multicellular organismal development /// membrane /// integral to membrane /// Wnt receptor signaling pathway /// Wnt-protein binding /// Wnt receptor activity
7921900	-1.63859	0.32117	5.8531	-5.19868	4.72022e-05	0.00229444	2.01158	SH2D1B	SH2 domain containing 1B	molecular_function /// protein binding /// cellular_component /// biological_process
8115010	-1.64197	0.32042	3.51369	-5.17383	4.99158e-05	0.00239488	1.95666	---	---	---
7896709	-1.65688	0.317124	8.76643	-6.63399	2.1055e-06	0.000253093	5.06795	---	---	---
8105302	-1.70928	0.305813	10.6713	-14.2435	9.23416e-12	4.39242e-08	16.7465	FST	follistatin	negative regulation of transcription from RNA polymerase II promoter /// hemopoietic progenitor cell differentiation /// signal transducer activity /// protein binding /// extracellular region /// gamete generation /// pattern specification process /// female gonad development /// BMP signaling pathway /// hair follicle morphogenesis /// negative regulation of activin receptor signaling pathway /…
7980152	-1.71263	0.305103	8.9363	-11.5032	3.88928e-10	4.76386e-07	13.336	LTBP2	latent transforming growth factor beta binding protein 2	calcium ion binding /// protein binding /// extracellular region /// proteinaceous extracellular matrix /// protein targeting /// transforming growth factor beta receptor signaling pathway /// protein secretion /// growth factor binding
8171248	-1.71762	0.304049	8.78514	-11.4668	4.10587e-10	4.76386e-07	13.2855	KAL1	Kallmann syndrome 1 sequence	serine-type endopeptidase inhibitor activity /// extracellular matrix structural constituent /// protein binding /// extracellular region /// proteinaceous extracellular matrix /// extracellular space /// cellular component movement /// chemotaxis /// cell adhesion /// axon guidance /// cell surface /// peptidase inhibitor activity /// cell adhesion
8054344	-1.72209	0.303109	6.19729	-8.72672	3.6558e-08	1.18182e-05	9.01866	hCG_1645516 /// RFX8	hypothetical protein LOC731220 /// regulatory factor X, 8	DNA binding /// regulation of transcription, DNA-dependent
8114572	-1.7334	0.300743	10.7951	-9.54483	8.74481e-09	3.93481e-06	10.394	HBEGF	heparin-binding EGF-like growth factor	receptor activity /// epidermal growth factor receptor binding /// extracellular region /// extracellular space /// extracellular space /// extracellular space /// plasma membrane /// integral to plasma membrane /// integral to plasma membrane /// signal transduction /// epidermal growth factor receptor signaling pathway /// muscle organ development /// regulation of heart contraction /// growth …
7912706	-1.7475	0.297817	9.95693	-6.7559	1.63614e-06	0.000207143	5.31536	EPHA2	EPH receptor A2	nucleotide binding /// angiogenesis /// transmembrane receptor protein tyrosine kinase activity /// receptor activity /// ephrin receptor activity /// protein binding /// ATP binding /// plasma membrane /// integral to plasma membrane /// protein amino acid phosphorylation /// apoptosis /// signal transduction /// multicellular organismal development /// transferase activity /// neuron differenti…
7930299	-1.78781	0.289612	8.58304	-6.87353	1.28514e-06	0.000171852	5.55211	C10orf78	chromosome 10 open reading frame 78	---
8063785	-1.79377	0.288417	7.09266	-5.98343	8.35871e-06	0.000652083	3.71354	C20orf197	chromosome 20 open reading frame 197	---
8109651	-1.85689	0.276071	7.88731	-5.00877	7.24548e-05	0.00315776	1.59068	GABRA6	gamma-aminobutyric acid (GABA) A receptor, alpha 6	GABA-A receptor activity /// ion channel activity /// inhibitory extracellular ligand-gated ion channel activity /// chloride channel activity /// plasma membrane /// integral to plasma membrane /// transport /// ion transport /// chloride transport /// signal transduction /// gamma-aminobutyric acid signaling pathway /// drug binding /// benzodiazepine receptor activity /// GABA-gated chloride i…
7909446	-1.86173	0.275147	9.17151	-4.41819	0.000279536	0.00836418	0.267686	HSD11B1	hydroxysteroid (11-beta) dehydrogenase 1	11-beta-hydroxysteroid dehydrogenase activity /// binding /// endoplasmic reticulum /// endoplasmic reticulum membrane /// steroid biosynthetic process /// membrane /// integral to membrane /// oxidoreductase activity /// lung development /// oxidation reduction /// 11-beta-hydroxysteroid dehydrogenase (NADP+) activity /// lipid metabolic process
7937251	-1.86304	0.274896	7.58065	-7.03611	9.23264e-07	0.000138094	5.8761	LOC285299 /// FRG2B /// FRG2 /// FRG2C	FSHD region gene 2 family, member C-like /// FSHD region gene 2 family, member B /// FSHD region gene 2 /// FSHD region gene 2 family, member C	nucleus
[truncated: 29 more rows]
