# Supplementary material for: Suppression of IFN-Induced Transcription Underlies IFN Defects Generated by Activated Ras/MEK in Human Cancer Cells
Source: PLoS One. 2012 Sep 7;7(9):e44267. doi: 10.1371/journal.pone.0044267 (PMC3436881; doi:10.1371/journal.pone.0044267)
Supplement: File S5 — Differentially expressed genes in HT1080 cells treated with IFN and U0126 for 6 h compared to vehicle treated controls (FDR <0.01). (XLS) [file pone.0044267.s010.xls]

## Sheet: ttUI6p01
ID	logFC	FC	AveExpr	t	P.Value	adj.P.Val	B	Gene Symbol	Gene Title	GO Description
7937335	5.24461	37.9128	9.81198	21.9276	3.33296e-15	8.00483e-11	23.9311	IFITM1	interferon induced transmembrane protein 1 (9-27)	receptor signaling protein activity /// protein binding /// plasma membrane /// cell surface receptor linked signaling pathway /// negative regulation of cell proliferation /// response to biotic stimulus /// integral to membrane /// cell surface receptor linked signal transduction
7902541	5.02515	32.5627	8.24287	13.6996	1.84696e-11	2.36532e-08	16.333	IFI44L	interferon-induced protein 44-like	cytoplasm /// immune response
8068697	4.76246	27.1421	8.63175	15.1916	2.90333e-12	8.05601e-09	18.0456	MX2	myxovirus (influenza virus) resistance 2 (mouse)	nucleotide binding /// GTPase activity /// GTP binding /// nucleus /// cytoplasm /// defense response /// response to virus /// GTPase activity /// cytoplasm
8068713	4.27385	19.3445	9.45938	16.951	3.95864e-13	2.19685e-09	19.8461	MX1	myxovirus (influenza virus) resistance 1, interferon-inducible protein p78 (mouse)	nucleotide binding /// GTPase activity /// protein binding /// GTP binding /// cytoplasm /// cytosol /// induction of apoptosis /// defense response /// signal transduction /// response to virus /// GTP binding
7958913	4.18744	18.2199	9.96456	10.9938	8.40299e-10	3.22893e-07	12.701	OAS2	2'-5'-oligoadenylate synthetase 2, 69/71kDa	nucleotide binding /// 2'-5'-oligoadenylate synthetase activity /// RNA binding /// ATP binding /// nucleus /// mitochondrion /// endoplasmic reticulum /// microsome /// nucleobase, nucleoside, nucleotide and nucleic acid metabolic process /// RNA catabolic process /// immune response /// membrane /// transferase activity /// nucleotidyltransferase activity /// microsome
7929065	3.73081	13.2766	11.0389	5.98747	8.28605e-06	0.000503468	3.63878	IFIT1	interferon-induced protein with tetratricopeptide repeats 1	molecular_function /// binding /// cytoplasm /// biological_process
7958884	3.42423	10.7349	10.258	12.4818	9.49633e-11	6.58748e-08	14.7897	OAS1	2',5'-oligoadenylate synthetase 1, 40/46kDa	nucleotide binding /// RNA binding /// ATP binding /// nucleus /// cytoplasm /// mitochondrion /// endoplasmic reticulum /// microsome /// nucleobase, nucleoside, nucleotide and nucleic acid metabolic process /// immune response /// transferase activity /// nucleotidyltransferase activity
7976443	3.3461	10.169	9.90699	7.40259	4.43888e-07	5.07908e-05	6.54834	IFI27	interferon, alpha-inducible protein 27	molecular_function /// biological_process /// membrane /// integral to membrane
7914127	3.31803	9.97301	12.0912	6.6474	2.04768e-06	0.00016835	5.02933	IFI6	interferon, alpha-inducible protein 6	release of cytochrome c from mitochondria /// protein binding /// mitochondrion /// anti-apoptosis /// immune response /// membrane /// integral to membrane /// negative regulation of caspase activity /// negative regulation of mitochondrial depolarization
8040080	3.19713	9.17131	9.14905	5.21202	4.58084e-05	0.00190185	1.93936	RSAD2	radical S-adenosyl methionine domain containing 2	molecular_function /// catalytic activity /// endoplasmic reticulum /// endoplasmic reticulum membrane /// Golgi apparatus /// membrane /// regulation of ossification /// metal ion binding /// iron-sulfur cluster binding /// defense response to virus /// iron ion binding
8074606	2.91234	7.5284	10.6712	12.4957	9.31419e-11	6.58748e-08	14.8081	USP18 /// USP41	ubiquitin specific peptidase 18 /// ubiquitin specific peptidase 41	ubiquitin thiolesterase activity /// ubiquitin-specific protease activity /// nucleus /// ubiquitin-dependent protein catabolic process /// peptidase activity /// cysteine-type peptidase activity /// nucleus
8103563	2.69969	6.49663	9.61208	7.96194	1.50302e-07	2.21443e-05	7.6216	DDX60	DEAD (Asp-Glu-Ala-Asp) box polypeptide 60	nucleotide binding /// RNA binding /// helicase activity /// ATP binding /// ATP-dependent helicase activity /// hydrolase activity
7902553	2.67212	6.37366	9.55848	4.53896	0.000211727	0.00603635	0.423762	IFI44	interferon-induced protein 44	cytoplasm /// response to virus
8124562	2.64755	6.26601	7.50292	14.2378	9.30112e-12	1.72055e-08	16.9721	ZNF323	zinc finger protein 323	transcription factor activity /// intracellular /// nucleus /// cytoplasm /// regulation of transcription, DNA-dependent /// zinc ion binding /// metal ion binding /// nucleus
8096335	2.63088	6.19403	9.84174	15.2091	2.84356e-12	8.05601e-09	18.0646	HERC6	hect domain and RLD 6	intracellular /// cytoplasm /// cytosol /// protein modification process /// ligase activity /// acid-amino acid ligase activity /// modification-dependent protein catabolic process
8007446	2.62642	6.1749	10.689	14.484	6.84481e-12	1.3843e-08	17.2562	IFI35	interferon-induced protein 35	protein binding /// nucleus /// immune response /// response to virus
8090018	2.54819	5.84901	9.63711	12.7478	6.5712e-11	5.20955e-08	15.1388	PARP9	poly (ADP-ribose) polymerase family, member 9	NAD+ ADP-ribosyltransferase activity /// protein binding /// nucleus /// nucleus /// cytoplasm /// cell migration /// transferase activity /// molecular_function
7958895	2.52904	5.77189	9.90453	13.5699	2.18628e-11	2.69617e-08	16.1751	OAS3	2'-5'-oligoadenylate synthetase 3, 100kDa	nucleotide binding /// RNA binding /// ATP binding /// microsome /// nucleobase, nucleoside, nucleotide and nucleic acid metabolic process /// immune response /// transferase activity /// nucleotidyltransferase activity
8098287	2.45639	5.4884	7.03342	5.64204	1.76005e-05	0.000892	2.88957	---	---	---
8101126	2.45076	5.46704	6.6705	7.78329	2.11444e-07	2.8973e-05	7.28365	CXCL10	chemokine (C-X-C motif) ligand 10	receptor binding /// extracellular region /// extracellular space /// chemotaxis /// inflammatory response /// immune response /// signal transduction /// cell surface receptor linked signaling pathway /// G-protein coupled receptor protein signaling pathway /// cell-cell signaling /// muscle organ development /// chemokine activity /// blood circulation /// positive regulation of cell proliferat…
8040103	2.43812	5.41937	9.49687	10.2779	2.59676e-09	8.15701e-07	11.6074	ID2	inhibitor of DNA binding 2, dominant negative helix-loop-helix protein	negative regulation of transcription from RNA polymerase II promoter /// chromatin /// protein binding /// nucleus /// cytoplasm /// cytosol /// multicellular organismal development /// heart development /// positive regulation of cell proliferation /// negative regulation of transcription /// transcription repressor activity /// enucleate erythrocyte differentiation /// negative regulation of tr…
8056285	2.43343	5.40177	8.66255	9.88887	4.90851e-09	1.42525e-06	10.987	IFIH1	interferon induced with helicase C domain 1	nucleotide binding /// DNA binding /// RNA binding /// helicase activity /// protein binding /// ATP binding /// intracellular /// nucleus /// cytoplasm /// zinc ion binding /// response to virus /// hydrolase activity /// regulation of apoptosis /// interspecies interaction between organisms /// innate immune response /// metal ion binding
8071155	2.35677	5.12221	9.72424	13.3219	3.02933e-11	2.9667e-08	15.8692	USP18	ubiquitin specific peptidase 18	ubiquitin thiolesterase activity /// ubiquitin-specific protease activity /// nucleus /// ubiquitin-dependent protein catabolic process /// peptidase activity /// cysteine-type peptidase activity /// nucleus
8140971	2.31003	4.95892	9.86745	7.94765	1.54437e-07	2.2554e-05	7.59474	SAMD9L	sterile alpha motif domain containing 9-like	---
8083743	2.28844	4.88527	6.68093	8.19022	9.77758e-08	1.55772e-05	8.04688	ARL14	ADP-ribosylation factor-like 14	nucleotide binding /// GTP binding /// intracellular /// small GTPase mediated signal transduction
7917530	2.2861	4.87736	7.64158	6.9789	1.03679e-06	9.80742e-05	5.70591	---	---	---
8129666	2.26636	4.81108	8.22952	7.78685	2.10001e-07	2.88943e-05	7.29043	SLC2A12	solute carrier family 2 (facilitated glucose transporter), member 12	transporter activity /// cytoplasm /// carbohydrate transport /// endomembrane system /// membrane /// integral to membrane /// substrate-specific transmembrane transporter activity /// perinuclear region of cytoplasm /// transmembrane transport
7953603	2.24614	4.74411	7.76813	8.3236	7.6295e-08	1.29612e-05	8.29199	C1S	complement component 1, s subcomponent	serine-type endopeptidase activity /// calcium ion binding /// extracellular region /// proteolysis /// complement activation, classical pathway /// peptidase activity /// glial cell differentiation /// innate immune response /// response to cAMP
7917532	2.21666	4.64815	7.61207	9.16711	1.67548e-08	3.76051e-06	9.78503	GBP2	guanylate binding protein 2, interferon-inducible	nucleotide binding /// GTPase activity /// GTP binding /// plasma membrane /// immune response /// GTP binding
8103601	2.19793	4.58821	9.29266	13.3766	2.81782e-11	2.9667e-08	15.9372	DDX60L	DEAD (Asp-Glu-Ala-Asp) box polypeptide 60-like	nucleotide binding /// RNA binding /// helicase activity /// ATP binding /// ATP-dependent helicase activity /// hydrolase activity
8035304	2.17628	4.51987	7.39655	6.86586	1.30545e-06	0.00011844	5.47691	BST2 /// BST2	bone marrow stromal cell antigen 2 /// bone marrow stromal cell antigen 2	signal transducer activity /// Golgi apparatus /// plasma membrane /// integral to plasma membrane /// humoral immune response /// cell-cell signaling /// multicellular organismal development /// cell proliferation /// response to virus /// anchored to membrane /// B cell activation /// positive regulation of I-kappaB kinase/NF-kappaB cascade /// Golgi apparatus /// plasma membrane
8057744	2.16528	4.48553	11.7389	17.5353	2.12572e-13	1.76951e-09	20.3975	STAT1	signal transducer and activator of transcription 1, 91kDa	DNA binding /// transcription factor activity /// signal transducer activity /// hematopoietin/interferon-class (D200-domain) cytokine receptor signal transducer activity /// calcium ion binding /// protein binding /// nucleus /// nucleolus /// cytoplasm /// regulation of transcription, DNA-dependent /// transcription from RNA polymerase II promoter /// induction of apoptosis /// activation of ca…
7915787	2.15823	4.46367	8.97482	6.22683	4.95851e-06	0.000343966	4.1496	PIK3R3	phosphoinositide-3-kinase, regulatory subunit 3 (gamma)	protein binding /// phosphoinositide 3-kinase complex /// insulin receptor signaling pathway /// 1-phosphatidylinositol-3-kinase activity /// phosphoinositide 3-kinase regulator activity /// 1-phosphatidylinositol-3-kinase regulator activity
8015511	2.15809	4.46324	8.5511	10.6056	1.53898e-09	5.39405e-07	12.1154	DHX58	DEXH (Asp-Glu-X-His) box polypeptide 58	nucleotide binding /// DNA binding /// RNA binding /// helicase activity /// protein binding /// ATP binding /// cytoplasm /// zinc ion binding /// hydrolase activity /// innate immune response /// metal ion binding /// ATP-dependent helicase activity
7958262	2.10248	4.29446	7.85396	4.91648	8.9331e-05	0.00315759	1.27713	TCP11L2	t-complex 11 (mouse)-like 2	---
8099912	2.09906	4.28431	8.74612	10.9912	8.43671e-10	3.22893e-07	12.6971	C4orf34	chromosome 4 open reading frame 34	protein binding /// membrane /// integral to membrane
8096361	2.07014	4.19926	6.96674	9.80768	5.61819e-09	1.58533e-06	10.8552	HERC5	hect domain and RLD 5	regulation of cyclin-dependent protein kinase activity /// intracellular /// cytoplasm /// protein modification process /// ligase activity /// acid-amino acid ligase activity /// perinuclear region of cytoplasm /// modification-dependent protein catabolic process
8086125	2.05703	4.16128	8.64445	8.81493	3.12079e-08	5.93789e-06	9.17349	LBA1 /// TRANK1	lupus brain antigen 1 /// tetratricopeptide repeat and ankyrin repeat containing 1	DNA binding /// ATP-dependent DNA helicase activity /// binding /// ATP binding /// DNA repair
8082100	1.98651	3.96277	10.4134	14.8326	4.46635e-12	9.91441e-09	17.6502	PARP14	poly (ADP-ribose) polymerase family, member 14	NAD+ ADP-ribosyltransferase activity /// nucleus /// cytoplasm /// plasma membrane /// transferase activity, transferring glycosyl groups /// regulation of transcription /// protein binding /// cytoplasm
8089261	1.98489	3.95831	9.88263	4.65818	0.000161063	0.0049156	0.69389	CBLB	Cas-Br-M (murine) ecotropic retroviral transforming sequence b	positive regulation of T cell anergy /// signal transducer activity /// calcium ion binding /// protein binding /// nucleus /// cytoplasm /// NLS-bearing substrate import into nucleus /// immune response /// signal transduction /// cell surface receptor linked signaling pathway /// zinc ion binding /// ligase activity /// T cell activation /// positive regulation of protein catabolic process /// …
7987454	1.97599	3.93398	8.05915	11.2485	5.69868e-10	2.40189e-07	13.0755	BMF	Bcl2 modifying factor	protein binding /// protein binding /// cytoplasm /// cytosol /// plasma membrane /// apoptosis /// myosin complex /// regulation of apoptosis
8118571	1.9126	3.76486	9.75956	13.9581	1.32481e-11	2.0051e-08	16.6431	PSMB9	proteasome (prosome, macropain) subunit, beta type, 9 (large multifunctional peptidase 2)	proteasome complex /// threonine-type endopeptidase activity /// nucleus /// cytoplasm /// proteasome core complex /// immune response /// peptidase activity /// antigen processing and presentation /// anaphase-promoting complex-dependent proteasomal ubiquitin-dependent protein catabolic process /// interspecies interaction between organisms /// negative regulation of ubiquitin-protein ligase act…
8178211	1.9126	3.76486	9.75956	13.9581	1.32481e-11	2.0051e-08	16.6431	PSMB9	proteasome (prosome, macropain) subunit, beta type, 9 (large multifunctional peptidase 2)	proteasome complex /// threonine-type endopeptidase activity /// nucleus /// cytoplasm /// proteasome core complex /// immune response /// peptidase activity /// antigen processing and presentation /// anaphase-promoting complex-dependent proteasomal ubiquitin-dependent protein catabolic process /// interspecies interaction between organisms /// negative regulation of ubiquitin-protein ligase act…
8179495	1.9126	3.76486	9.75956	13.9581	1.32481e-11	2.0051e-08	16.6431	PSMB9	proteasome (prosome, macropain) subunit, beta type, 9 (large multifunctional peptidase 2)	proteasome complex /// threonine-type endopeptidase activity /// nucleus /// cytoplasm /// proteasome core complex /// immune response /// peptidase activity /// antigen processing and presentation /// anaphase-promoting complex-dependent proteasomal ubiquitin-dependent protein catabolic process /// interspecies interaction between organisms /// negative regulation of ubiquitin-protein ligase act…
7917516	1.90356	3.74134	10.9224	11.4856	3.99276e-10	1.81929e-07	13.4177	GBP3 /// GBP1	guanylate binding protein 3 /// guanylate binding protein 1, interferon-inducible, 67kDa	nucleotide binding /// GTPase activity /// GTP binding /// plasma membrane /// membrane /// integral to membrane /// immune response /// GTP binding
8101131	1.89651	3.72312	5.94756	6.25815	4.63874e-06	0.000325171	4.21592	CXCL11	chemokine (C-X-C motif) ligand 11	extracellular region /// extracellular space /// chemotaxis /// inflammatory response /// immune response /// signal transduction /// G-protein coupled receptor protein signaling pathway /// cell-cell signaling /// chemokine activity /// extracellular region /// chemotaxis /// inflammatory response /// chemokine activity
8084630	1.89543	3.72033	10.6407	4.98827	7.58998e-05	0.0027833	1.43857	---	---	---
8047926	1.85747	3.62372	6.50277	6.30636	4.18749e-06	0.00030311	4.31773	MAP2	microtubule-associated protein 2	microtubule bundle formation /// structural molecule activity /// calmodulin binding /// intracellular /// cytoplasm /// cytoskeleton /// microtubule /// microtubule associated complex /// negative regulation of microtubule depolymerization /// dendrite development /// peptidyl-threonine phosphorylation /// rough microsome /// smooth microsome /// neuronal cell body /// dendritic shaft
8072678	1.82969	3.5546	10.2878	6.10077	6.49235e-06	0.000426382	3.88147	HMOX1	heme oxygenase (decycling) 1	angiogenesis /// response to hypoxia /// endothelial cell proliferation /// healing during inflammatory response /// negative regulation of leukocyte migration /// heme oxygenase (decyclizing) activity /// heme oxygenase (decyclizing) activity /// phospholipase D activity /// signal transducer activity /// extracellular space /// membrane fraction /// nucleus /// nucleolus /// endoplasmic reticul…
8141843	1.78901	3.45578	6.94298	5.64658	1.74254e-05	0.000887176	2.89951	LOC100286937 /// RASA4	similar to HSPC047 protein /// RAS p21 protein activator 4	GTPase activator activity /// intracellular /// cytoplasm /// cytosol /// plasma membrane /// metal ion binding /// regulation of small GTPase mediated signal transduction /// intracellular signaling cascade /// zinc ion binding
7964119	1.78781	3.45291	9.71136	10.3768	2.21492e-09	7.09135e-07	11.762	STAT2	signal transducer and activator of transcription 2, 113kDa	transcription factor activity /// signal transducer activity /// hematopoietin/interferon-class (D200-domain) cytokine receptor signal transducer activity /// calcium ion binding /// protein binding /// nucleus /// cytoplasm /// regulation of transcription from RNA polymerase II promoter /// signal transduction /// JAK-STAT cascade /// response to virus /// interspecies interaction between organi…
7929052	1.78702	3.451	8.46965	4.61345	0.000178451	0.00534454	0.592598	IFIT3	interferon-induced protein with tetratricopeptide repeats 3	molecular_function /// binding /// cellular_component /// biological_process
8066117	1.78666	3.45015	10.489	9.32119	1.28246e-08	3.06882e-06	10.0474	C20orf118 /// SAMHD1	chromosome 20 open reading frame 118 /// SAM domain and HD domain 1	intracellular /// nucleus /// immune response /// hydrolase activity /// regulation of innate immune response /// defense response to virus /// catalytic activity
7896703	1.77193	3.4151	5.3924	5.80443	1.23296e-05	0.000674117	3.24348	---	---	---
7918426	1.75488	3.37498	8.59434	6.85481	1.33532e-06	0.000120494	5.45442	SLC16A4	solute carrier family 16, member 4 (monocarboxylic acid transporter 5)	membrane fraction /// plasma membrane /// integral to plasma membrane /// monocarboxylic acid transmembrane transporter activity /// symporter activity /// monocarboxylic acid transport /// transmembrane transport /// transport
8012949	1.75479	3.37477	7.72939	7.65297	2.71952e-07	3.52342e-05	7.03426	TRIM16 /// FBXW10 /// CDRT1	tripartite motif-containing 16 /// F-box and WD repeat domain containing 10 /// CMT1A duplicated region transcript 1	molecular_function /// cellular_component /// biological_process /// DNA binding /// protein binding /// intracellular /// cytoplasm /// zinc ion binding /// transcription activator activity /// PML body /// interleukin-1 binding /// NACHT domain binding /// response to retinoic acid /// positive regulation of gene-specific transcription /// histone H3 acetylation /// histone H4 acetylation /// p…
8113504	1.75343	3.37159	10.1519	9.54984	8.67065e-09	2.20446e-06	10.4309	C5orf13	chromosome 5 open reading frame 13	cytoplasm /// protein binding /// regulation of transforming growth factor beta receptor signaling pathway
8059650	1.74154	3.34392	10.1086	17.1577	3.17026e-13	2.1112e-09	20.0437	SP110	SP110 nuclear body protein	DNA binding /// hematopoietin/interferon-class (D200-domain) cytokine receptor signal transducer activity /// protein binding /// nucleus /// zinc ion binding /// interspecies interaction between organisms /// regulation of transcription /// metal ion binding /// DNA binding /// nucleus
8097288	1.74048	3.34147	7.9548	5.11207	5.73667e-05	0.00224458	1.71613	FAT4	FAT tumor suppressor homolog 4 (Drosophila)	calcium ion binding /// protein binding /// plasma membrane /// cell adhesion /// homophilic cell adhesion /// integral to membrane /// membrane
7960744	1.73986	3.34002	8.2493	10.2329	2.79303e-09	8.69155e-07	11.5365	C1R	complement component 1, r subcomponent	serine-type endopeptidase activity /// calcium ion binding /// extracellular region /// extracellular region /// proteolysis /// immune response /// complement activation, classical pathway /// peptidase activity /// serine-type peptidase activity /// innate immune response /// serine-type endopeptidase activity
8127158	1.73539	3.3297	10.6383	6.18337	5.4401e-06	0.000368978	4.05738	GCLC	glutamate-cysteine ligase, catalytic subunit	nucleotide binding /// magnesium ion binding /// glutamate-cysteine ligase activity /// glutamate-cysteine ligase activity /// ATP binding /// cytosol /// cysteine metabolic process /// glutamate metabolic process /// glutathione biosynthetic process /// glutathione biosynthetic process /// anti-apoptosis /// response to oxidative stress /// response to heat /// response to xenobiotic stimulus //…
7896817	1.71976	3.29381	8.63041	9.88715	4.92249e-09	1.42525e-06	10.9843	ISG15	ISG15 ubiquitin-like modifier	protein binding /// extracellular region /// extracellular space /// cytoplasm /// cell-cell signaling /// response to virus /// modification-dependent protein catabolic process /// protein tag /// ISG15-protein conjugation /// interspecies interaction between organisms /// protein binding
7982366	1.70842	3.26803	8.76058	8.83205	3.02674e-08	5.79204e-06	9.20362	SCG5	secretogranin V (7B2 protein)	enzyme inhibitor activity /// protein binding /// GTP binding /// extracellular region /// transport /// intracellular protein transport /// neuropeptide signaling pathway /// peptide hormone processing /// secretory granule /// regulation of hormone secretion /// unfolded protein binding
8072735	1.70476	3.25975	8.77213	5.58844	1.98075e-05	0.000977081	2.77214	APOL1	apolipoprotein L, 1	chloride channel activity /// protein binding /// extracellular region /// extracellular space /// chloride transport /// lipid transport /// steroid metabolic process /// cholesterol metabolic process /// lipid binding /// cytolysis /// intrinsic to membrane /// killing of cells of another organism /// very-low-density lipoprotein particle /// high-density lipoprotein particle /// lipoprotein me…
8098611	1.67731	3.19832	9.48358	8.22129	9.22656e-08	1.477e-05	8.10421	TLR3	toll-like receptor 3	microglial cell activation during immune response /// double-stranded RNA binding /// double-stranded RNA binding /// receptor activity /// transmembrane receptor activity /// protein binding /// cytoplasm /// endosome /// endoplasmic reticulum /// endoplasmic reticulum membrane /// integral to plasma membrane /// hyperosmotic response /// signal transduction /// activation of NF-kappaB-inducing …
8140967	1.67701	3.19765	10.3795	7.04102	9.1414e-07	8.90003e-05	5.83102	SAMD9	sterile alpha motif domain containing 9	cytoplasm
8124911	1.67328	3.1894	11.3341	10.5615	1.6501e-09	5.72325e-07	12.0478	HLA-C /// HLA-B	major histocompatibility complex, class I, C /// major histocompatibility complex, class I, B	antigen processing and presentation of peptide antigen via MHC class I /// protein binding /// membrane fraction /// plasma membrane /// integral to plasma membrane /// defense response /// immune response /// immune response /// membrane /// integral to membrane /// antigen processing and presentation /// MHC class I receptor activity /// MHC class I protein complex /// interspecies interaction …
7938035	1.65949	3.15905	9.72737	8.57979	4.76858e-08	8.68442e-06	8.75578	TRIM22	tripartite motif-containing 22	transcription factor activity /// transcription corepressor activity /// protein binding /// intracellular /// nucleus /// cytoplasm /// Golgi apparatus /// regulation of transcription, DNA-dependent /// immune response /// zinc ion binding /// response to virus /// Cajal body /// nuclear speck /// ligase activity /// intracellular membrane-bounded organelle /// interspecies interaction between o…
8178498	1.65765	3.15502	11.4535	11.4771	4.04324e-10	1.81929e-07	13.4056	HLA-C /// HLA-B	major histocompatibility complex, class I, C /// major histocompatibility complex, class I, B	antigen processing and presentation of peptide antigen via MHC class I /// protein binding /// membrane fraction /// plasma membrane /// integral to plasma membrane /// defense response /// immune response /// immune response /// membrane /// integral to membrane /// antigen processing and presentation /// MHC class I receptor activity /// MHC class I protein complex /// interspecies interaction …
8098263	1.65184	3.14234	7.30392	10.8215	1.09706e-09	4.05876e-07	12.4432	PALLD	palladin, cytoskeletal associated protein	actin binding /// protein binding /// nucleus /// cytoplasm /// cytoskeleton /// actin filament /// cytoskeleton organization /// muscle alpha-actinin binding
8179731	1.64697	3.13174	11.5345	11.805	2.49412e-10	1.38411e-07	13.8689	---	---	---
8087485	1.62316	3.08049	9.08709	7.91575	1.64101e-07	2.34509e-05	7.53466	UBA7	ubiquitin-like modifier activating enzyme 7	nucleotide binding /// ATP binding /// protein modification process /// metabolic process /// ligase activity /// ISG15 activating enzyme activity /// modification-dependent protein catabolic process /// ISG15-protein conjugation
8136336	1.62075	3.07535	6.13474	4.38623	0.000300893	0.00787644	0.0771704	AKR1B10	aldo-keto reductase family 1, member B10 (aldose reductase)	aldo-keto reductase activity /// protein binding /// cellular_component /// cytoplasm /// cellular aldehyde metabolic process /// digestion /// steroid metabolic process /// oxidoreductase activity /// oxidation reduction
8112731	1.6052	3.04238	9.02311	4.549	0.0002069	0.00595403	0.446526	F2RL2	coagulation factor II (thrombin) receptor-like 2	phosphoinositide phospholipase C activity /// receptor activity /// G-protein coupled receptor activity /// protein binding /// extracellular region /// plasma membrane /// integral to plasma membrane /// signal transduction /// G-protein coupled receptor protein signaling pathway /// blood coagulation /// response to wounding /// thrombin receptor activity /// apical plasma membrane /// G-protei…
8143327	1.59388	3.01859	9.6452	12.078	1.68097e-10	1.01766e-07	14.2461	PARP12	poly (ADP-ribose) polymerase family, member 12	nucleic acid binding /// NAD+ ADP-ribosyltransferase activity /// nucleus /// zinc ion binding /// transferase activity /// metal ion binding
8012951	1.59347	3.01774	8.83643	6.86037	1.32019e-06	0.000119452	5.46574	TRIM16 /// CDRT1 /// FBXW10	tripartite motif-containing 16 /// CMT1A duplicated region transcript 1 /// F-box and WD repeat domain containing 10	molecular_function /// cellular_component /// biological_process /// DNA binding /// protein binding /// intracellular /// cytoplasm /// zinc ion binding /// transcription activator activity /// PML body /// interleukin-1 binding /// NACHT domain binding /// response to retinoic acid /// positive regulation of gene-specific transcription /// histone H3 acetylation /// histone H4 acetylation /// p…
7973618	1.58332	2.99659	9.63831	8.4587	5.94848e-08	1.04246e-05	8.5377	IRF9	interferon regulatory factor 9	transcription factor activity /// protein binding /// nucleus /// cytoplasm /// regulation of transcription, DNA-dependent /// transcription from RNA polymerase II promoter /// cell surface receptor linked signaling pathway /// response to virus /// identical protein binding /// type I interferon biosynthetic process /// transcription factor activity /// nucleus /// cytoplasm /// cell surface rec…
7951217	1.58065	2.99104	6.43402	7.43207	4.18824e-07	4.85909e-05	6.60601	MMP7	matrix metallopeptidase 7 (matrilysin, uterine)	metalloendopeptidase activity /// extracellular region /// proteinaceous extracellular matrix /// extracellular space /// proteolysis /// metabolic process /// peptidase activity /// zinc ion binding /// collagen catabolic process /// regulation of cell proliferation /// metal ion binding /// metalloendopeptidase activity /// calcium ion binding /// proteolysis
7972932	1.57332	2.97589	7.64855	6.70164	1.83008e-06	0.000153106	5.14105	FLJ41484	hypothetical LOC650669	---
7969129	1.57312	2.97547	8.09759	8.77329	3.36242e-08	6.36127e-06	9.10007	PHF11	PHD finger protein 11	protein binding /// nucleus /// zinc ion binding /// regulation of transcription /// metal ion binding
8004184	1.57102	2.97114	7.42171	8.17952	9.97497e-08	1.5816e-05	8.02712	XAF1	XIAP associated factor 1	nucleus /// cytoplasm /// mitochondrion /// apoptosis /// zinc ion binding /// metal ion binding
8147145	1.56963	2.96829	7.80763	6.59908	2.26404e-06	0.000181215	4.92944	ATP6V0D2	ATPase, H+ transporting, lysosomal 38kDa, V0 subunit d2	protein binding /// endosome /// ion transport /// hydrogen ion transmembrane transporter activity /// ATP synthesis coupled proton transport /// proton transport /// membrane /// apical plasma membrane /// vacuolar proton-transporting V-type ATPase complex /// proton-transporting V-type ATPase, V0 domain
7921434	1.54083	2.90962	8.94101	5.26064	4.10733e-05	0.00174685	2.04766	AIM2	absent in melanoma 2	protein binding /// nucleus /// immune response
8113073	1.53323	2.89433	9.94011	4.47414	0.000245753	0.0067571	0.276716	ARRDC3	arrestin domain containing 3	cytoplasm
8025551	1.50981	2.84772	9.39022	12.6569	7.4468e-11	5.51013e-08	15.0203	C19orf66 /// ANGPTL6	chromosome 19 open reading frame 66 /// angiopoietin-like 6	angiogenesis /// receptor binding /// extracellular region /// extracellular space /// signal transduction /// multicellular organismal development /// secretory granule /// cell differentiation
8090214	1.50109	2.83057	8.06399	12.2109	1.3908e-10	8.73762e-08	14.4267	SLC12A8	solute carrier family 12 (potassium/chloride transporters), member 8	ion transport /// potassium ion transport /// symporter activity /// membrane /// integral to membrane /// transmembrane transport /// potassium ion binding /// chloride ion binding
7948274	1.48621	2.80153	10.143	10.3642	2.26019e-09	7.16737e-07	11.7424	UBE2L6	ubiquitin-conjugating enzyme E2L 6	ubiquitin-protein ligase activity /// protein binding /// protein modification process /// ligase activity /// modification-dependent protein catabolic process /// ISG15-protein conjugation /// ISG15 ligase activity /// regulation of protein metabolic process /// ubiquitin-protein ligase activity /// post-translational protein modification
8156571	1.46614	2.76282	6.66369	9.59668	8.00881e-09	2.08336e-06	10.5086	C9orf3 /// MIR27B	chromosome 9 open reading frame 3 /// microRNA 27b	aminopeptidase activity /// binding /// cytoplasm /// proteolysis /// peptidase activity /// metallopeptidase activity /// zinc ion binding /// leukotriene biosynthetic process /// metal ion binding
7958200	1.45312	2.73799	9.99187	8.08777	1.18486e-07	1.80974e-05	7.85693	EID3	EP300 interacting inhibitor of differentiation 3	nucleus /// cytoplasm /// regulation of transcription
8177717	1.45274	2.73728	8.50101	15.0415	3.47273e-12	8.48996e-09	17.8814	HLA-F	major histocompatibility complex, class I, F	antigen processing and presentation of peptide antigen via MHC class I /// immune response /// membrane /// integral to membrane /// antigen processing and presentation /// MHC class I receptor activity /// MHC class I protein complex
8152703	1.44898	2.73015	9.62544	5.15946	5.15564e-05	0.00208082	1.82206	FBXO32	F-box protein 32	protein binding /// modification-dependent protein catabolic process
8131844	1.44543	2.72344	9.89538	7.2461	6.05505e-07	6.33696e-05	6.24015	GPNMB	glycoprotein (transmembrane) nmb	osteoblast differentiation /// integrin binding /// integral to plasma membrane /// cell adhesion /// heparin binding /// negative regulation of cell proliferation /// membrane /// integral to membrane /// cytoplasmic membrane-bounded vesicle /// bone mineralization /// melanosome
8117760	1.44118	2.71543	7.71512	15.3703	2.35047e-12	7.82635e-09	18.2387	HLA-F	major histocompatibility complex, class I, F	antigen processing and presentation of peptide antigen via MHC class I /// immune response /// membrane /// integral to membrane /// antigen processing and presentation /// MHC class I receptor activity /// MHC class I protein complex
8125512	1.4377	2.70889	10.2463	9.68254	6.92847e-09	1.89096e-06	10.6503	TAP1	transporter 1, ATP-binding cassette, sub-family B (MDR/TAP)	nucleotide binding /// transporter activity /// protein binding /// ATP binding /// endoplasmic reticulum /// endoplasmic reticulum lumen /// endoplasmic reticulum membrane /// cytosol /// protein complex assembly /// intracellular protein transport /// defense response /// immune response /// peptide transporter activity /// peptide antigen-transporting ATPase activity /// peptide transport /// …
8178867	1.4377	2.70889	10.2463	9.68254	6.92847e-09	1.89096e-06	10.6503	TAP1	transporter 1, ATP-binding cassette, sub-family B (MDR/TAP)	nucleotide binding /// transporter activity /// protein binding /// ATP binding /// endoplasmic reticulum /// endoplasmic reticulum lumen /// endoplasmic reticulum membrane /// cytosol /// protein complex assembly /// intracellular protein transport /// defense response /// immune response /// peptide transporter activity /// peptide antigen-transporting ATPase activity /// peptide transport /// …
8180061	1.4377	2.70889	10.2463	9.68254	6.92847e-09	1.89096e-06	10.6503	TAP1	transporter 1, ATP-binding cassette, sub-family B (MDR/TAP)	nucleotide binding /// transporter activity /// protein binding /// ATP binding /// endoplasmic reticulum /// endoplasmic reticulum lumen /// endoplasmic reticulum membrane /// cytosol /// protein complex assembly /// intracellular protein transport /// defense response /// immune response /// peptide transporter activity /// peptide antigen-transporting ATPase activity /// peptide transport /// …
7907893	1.43247	2.69908	8.23391	7.73503	2.32038e-07	3.09046e-05	7.19157	MR1	major histocompatibility complex, class I-related	antigen processing and presentation of peptide antigen via MHC class I /// extracellular region /// endoplasmic reticulum /// plasma membrane /// immune response /// integral to membrane /// antigen processing and presentation /// MHC class I receptor activity /// MHC class I protein complex /// immune response
8136200	1.43008	2.69462	9.84642	4.4182	0.000279527	0.00748183	0.149754	CPA4	carboxypeptidase A4	metallocarboxypeptidase activity /// cellular_component /// extracellular region /// proteolysis /// peptidase activity /// metallopeptidase activity /// zinc ion binding /// histone acetylation /// metal ion binding
7958273	1.429	2.6926	5.96743	5.11947	5.64172e-05	0.00222424	1.73269	---	---	---
8178489	1.42266	2.68079	11.0139	12.0165	1.83623e-10	1.0918e-07	14.1617	---	---	---
8047487	1.41388	2.66453	8.47308	8.99722	2.25741e-08	4.72736e-06	9.49212	FZD7	frizzled homolog 7 (Drosophila)	non-G-protein coupled 7TM receptor activity /// G-protein coupled receptor activity /// plasma membrane /// signal transduction /// G-protein coupled receptor protein signaling pathway /// multicellular organismal development /// integral to membrane /// Wnt receptor signaling pathway /// Wnt receptor activity /// plasma membrane /// integral to membrane
8124901	1.40613	2.65025	11.0075	11.6581	3.09292e-10	1.51448e-07	13.6628	HLA-C /// HLA-B	major histocompatibility complex, class I, C /// major histocompatibility complex, class I, B	antigen processing and presentation of peptide antigen via MHC class I /// protein binding /// membrane fraction /// plasma membrane /// integral to plasma membrane /// defense response /// immune response /// immune response /// membrane /// integral to membrane /// antigen processing and presentation /// MHC class I receptor activity /// MHC class I protein complex /// interspecies interaction …
8179041	1.4017	2.64213	11.7162	8.83652	3.00269e-08	5.77923e-06	9.21147	---	---	---
8179019	1.39996	2.63895	8.08772	15.5827	1.83377e-12	6.78433e-09	18.4651	HLA-F	major histocompatibility complex, class I, F	antigen processing and presentation of peptide antigen via MHC class I /// immune response /// membrane /// integral to membrane /// antigen processing and presentation /// MHC class I receptor activity /// MHC class I protein complex
7900633	1.38135	2.60512	6.46844	4.59649	0.000185529	0.00547656	0.554177	---	---	---
8129573	1.37813	2.59931	7.47932	11.8531	2.32521e-10	1.316e-07	13.9361	MOXD1	monooxygenase, DBH-like 1	monooxygenase activity /// dopamine beta-monooxygenase activity /// copper ion binding /// endoplasmic reticulum /// endoplasmic reticulum membrane /// histidine catabolic process /// catecholamine metabolic process /// cellular process /// membrane /// integral to membrane /// metal ion binding /// oxidation reduction
8080781	1.36759	2.58039	11.2403	7.2104	6.50253e-07	6.64156e-05	6.16935	PXK	PX domain containing serine/threonine kinase	nucleotide binding /// actin binding /// protein kinase activity /// protein binding /// ATP binding /// cytoplasm /// plasma membrane /// protein amino acid phosphorylation /// inflammatory response /// cell communication /// phosphoinositide binding /// regulation of synaptic transmission
8129937	1.36185	2.57014	11.1983	7.48979	3.73897e-07	4.4463e-05	6.71859	CITED2	Cbp/p300-interacting transactivator, with Glu/Asp-rich carboxy-terminal domain, 2	negative regulation of transcription from RNA polymerase II promoter /// nuclear chromatin /// blood vessel development /// vasculogenesis /// response to hypoxia /// trophectodermal cell differentiation /// liver development /// embryonic placenta development /// transcription factor activity /// transcription coactivator activity /// transcription corepressor activity /// protein binding /// nu…
8084732	1.36143	2.5694	7.27484	5.37568	3.17575e-05	0.00144655	2.30308	RTP4	receptor (chemosensory) transporter protein 4	detection of chemical stimulus involved in sensory perception of bitter taste /// protein binding /// cytoplasm /// protein targeting to membrane /// membrane /// integral to membrane
8151334	1.35681	2.56118	7.26042	5.93338	9.31467e-06	0.000547003	3.52238	MSC /// MSC	musculin (activated B-cell factor-1) /// musculin	transcription factor activity /// transcription corepressor activity /// nucleus /// transcription from RNA polymerase II promoter /// regulation of transcription /// nucleus
8179049	1.35635	2.56037	11.6062	8.13518	1.08387e-07	1.67081e-05	7.94503	HLA-G /// HLA-J /// HLA-A	major histocompatibility complex, class I, G /// major histocompatibility complex, class I, J (pseudogene) /// major histocompatibility complex, class I, A	Golgi membrane /// antigen processing and presentation of peptide antigen via MHC class I /// protein binding /// integral to plasma membrane /// immune response /// immune response /// membrane /// integral to membrane /// antigen processing and presentation /// early endosome membrane /// MHC class I receptor activity /// MHC class I protein complex /// interspecies interaction between organism…
8046003	1.35485	2.5577	6.82925	6.20094	5.23984e-06	0.000361223	4.0947	GCA	grancalcin, EF-hand calcium binding protein	calcium ion binding /// cytoplasm /// plasma membrane /// cellular membrane fusion /// protein homodimerization activity /// calcium ion binding /// cytoplasm /// membrane fusion
7925257	1.3455	2.54118	8.78519	8.13581	1.0826e-07	1.67081e-05	7.94618	LYST	lysosomal trafficking regulator	protein binding /// cytoplasm /// protein transport /// microtubule cytoskeleton /// leukocyte chemotaxis /// melanosome organization /// endosome to lysosome transport via multivesicular body sorting pathway /// mast cell secretory granule organization /// natural killer cell mediated cytotoxicity /// defense response to bacterium /// defense response to protozoan /// pigmentation /// defense re…
8005483	1.33922	2.53014	7.17875	5.75095	1.38584e-05	0.000739491	3.12724	TRIM16 /// FBXW10 /// CDRT1	tripartite motif-containing 16 /// F-box and WD repeat domain containing 10 /// CMT1A duplicated region transcript 1	molecular_function /// cellular_component /// biological_process /// DNA binding /// protein binding /// intracellular /// cytoplasm /// zinc ion binding /// transcription activator activity /// PML body /// interleukin-1 binding /// NACHT domain binding /// response to retinoic acid /// positive regulation of gene-specific transcription /// histone H3 acetylation /// histone H4 acetylation /// p…
8117476	1.33076	2.51536	8.53798	9.05406	2.04229e-08	4.38724e-06	9.59056	BTN3A3	butyrophilin, subfamily 3, member A3	membrane /// integral to membrane
8051501	1.32452	2.50449	11.1401	9.59691	8.00572e-09	2.08336e-06	10.509	EIF2AK2	eukaryotic translation initiation factor 2-alpha kinase 2	nucleotide binding /// double-stranded RNA binding /// protein serine/threonine kinase activity /// eukaryotic translation initiation factor 2alpha kinase activity /// protein binding /// ATP binding /// intracellular /// translation /// protein amino acid phosphorylation /// virus-infected cell apoptosis /// negative regulation of cell proliferation /// protein phosphatase type 2A regulator acti…
8117458	1.32185	2.49987	8.11441	6.01113	7.87349e-06	0.000487293	3.68959	BTN3A1	butyrophilin, subfamily 3, member A1	lipid metabolic process /// membrane /// integral to membrane
8014066	1.31997	2.49661	10.166	8.27904	8.28663e-08	1.35255e-05	8.21037	EVI2A	ecotropic viral integration site 2A	transmembrane receptor activity /// membrane /// integral to membrane
8177732	1.31543	2.48876	11.4917	11.7017	2.90076e-10	1.44159e-07	13.7243	HLA-A /// HLA-C /// HLA-K /// LOC441528 /// HLA-B	major histocompatibility complex, class I, A /// major histocompatibility complex, class I, C /// major histocompatibility complex, class I, K (pseudogene) /// hypothetical protein LOC441528 /// major histocompatibility complex, class I, B	Golgi membrane /// antigen processing and presentation of peptide antigen via MHC class I /// protein binding /// integral to plasma membrane /// immune response /// immune response /// membrane /// integral to membrane /// antigen processing and presentation /// early endosome membrane /// MHC class I receptor activity /// MHC class I protein complex /// interspecies interaction between organism…
8139033	1.30326	2.46785	6.08462	8.87498	2.80369e-08	5.45932e-06	9.27896	AOAH	acyloxyacyl hydrolase (neutrophil)	catalytic activity /// lipoprotein lipase activity /// lipid metabolic process /// inflammatory response /// hydrolase activity, acting on ester bonds /// acyloxyacyl hydrolase activity /// lipid metabolic process /// lipopolysaccharide metabolic process /// negative regulation of inflammatory response
8010454	1.29152	2.44786	10.1401	11.8512	2.33186e-10	1.316e-07	13.9333	RNF213 /// LOC100294362	ring finger protein 213 /// hypothetical LOC100294362	nucleotide binding /// protein binding /// zinc ion binding /// nucleoside-triphosphatase activity /// metal ion binding
8117813	1.28194	2.43166	11.4398	8.5759	4.80239e-08	8.68442e-06	8.74882	HLA-G /// HLA-J /// HLA-A	major histocompatibility complex, class I, G /// major histocompatibility complex, class I, J (pseudogene) /// major histocompatibility complex, class I, A	Golgi membrane /// antigen processing and presentation of peptide antigen via MHC class I /// protein binding /// integral to plasma membrane /// immune response /// immune response /// membrane /// integral to membrane /// antigen processing and presentation /// early endosome membrane /// MHC class I receptor activity /// MHC class I protein complex /// interspecies interaction between organism…
7924450	1.27669	2.42282	10.2168	6.7531	1.64561e-06	0.00013988	5.2467	DUSP10	dual specificity phosphatase 10	phosphoprotein phosphatase activity /// protein tyrosine phosphatase activity /// nucleus /// cytoplasm /// protein amino acid dephosphorylation /// response to stress /// JNK cascade /// hydrolase activity /// MAP kinase tyrosine/serine/threonine phosphatase activity /// nucleus /// cytoplasm /// protein amino acid dephosphorylation
8177725	1.27346	2.41741	11.3835	9.05921	2.02391e-08	4.37598e-06	9.59945	HLA-G /// HLA-A	major histocompatibility complex, class I, G /// major histocompatibility complex, class I, A	antigen processing and presentation of peptide antigen via MHC class I /// immune response /// cellular defense response /// membrane /// integral to membrane /// antigen processing and presentation /// MHC class I receptor activity /// MHC class I protein complex /// Golgi membrane /// protein binding /// integral to plasma membrane /// immune response /// early endosome membrane /// MHC class I…
8179034	1.27346	2.41741	11.3835	9.05921	2.02391e-08	4.37598e-06	9.59945	HLA-G /// HLA-A	major histocompatibility complex, class I, G /// major histocompatibility complex, class I, A	antigen processing and presentation of peptide antigen via MHC class I /// immune response /// cellular defense response /// membrane /// integral to membrane /// antigen processing and presentation /// MHC class I receptor activity /// MHC class I protein complex /// Golgi membrane /// protein binding /// integral to plasma membrane /// immune response /// early endosome membrane /// MHC class I…
7973306	1.26984	2.41135	9.67643	4.32972	0.00034276	0.00870548	-0.0511316	ABHD4	abhydrolase domain containing 4	lipid catabolic process /// hydrolase activity
8117800	1.26132	2.39714	11.4988	12.6593	7.42269e-11	5.51013e-08	15.0234	HLA-A /// HLA-C /// HLA-K /// LOC441528 /// HLA-B	major histocompatibility complex, class I, A /// major histocompatibility complex, class I, C /// major histocompatibility complex, class I, K (pseudogene) /// hypothetical protein LOC441528 /// major histocompatibility complex, class I, B	Golgi membrane /// antigen processing and presentation of peptide antigen via MHC class I /// protein binding /// integral to plasma membrane /// immune response /// immune response /// membrane /// integral to membrane /// antigen processing and presentation /// early endosome membrane /// MHC class I receptor activity /// MHC class I protein complex /// interspecies interaction between organism…
8113761	1.25747	2.39077	7.44177	5.66068	1.68934e-05	0.000866917	2.93034	ZNF608	zinc finger protein 608	intracellular /// zinc ion binding /// metal ion binding
8060997	1.25262	2.38273	8.71967	5.49408	2.44062e-05	0.00115928	2.56465	SPTLC3	serine palmitoyltransferase, long chain base subunit 3	serine C-palmitoyltransferase activity /// endoplasmic reticulum /// endoplasmic reticulum membrane /// acyltransferase activity /// biosynthetic process /// membrane /// integral to membrane /// transferase activity, transferring nitrogenous groups /// serine C-palmitoyltransferase complex /// sphingolipid biosynthetic process /// pyridoxal phosphate binding /// sphingoid biosynthetic process
8070097	1.24919	2.37708	6.51359	7.61153	2.94754e-07	3.74001e-05	6.95445	DNAJC28	DnaJ (Hsp40) homolog, subfamily C, member 28	heat shock protein binding
7974697	1.24767	2.37457	7.89514	5.70383	1.53656e-05	0.000803518	3.02458	DAAM1	dishevelled associated activator of morphogenesis 1	actin binding /// cytoplasm /// cellular component organization /// actin cytoskeleton organization /// Rho GTPase binding
8010426	1.24443	2.36925	9.7426	11.8804	2.23504e-10	1.30562e-07	13.9739	KIAA1618 /// RNF213	KIAA1618 /// ring finger protein 213	nucleotide binding /// protein binding /// zinc ion binding /// nucleoside-triphosphatase activity /// metal ion binding
7951397	1.23612	2.35564	6.6079	6.50918	2.73139e-06	0.000211505	4.74279	CASP1	caspase 1, apoptosis-related cysteine peptidase (interleukin 1, beta, convertase)	response to hypoxia /// cysteine-type endopeptidase activity /// protein binding /// extracellular region /// intracellular /// cytoplasm /// proteolysis /// apoptosis /// induction of apoptosis /// signal transduction /// cell death /// peptidase activity /// caspase activator activity /// protein processing /// response to ATP /// response to chemical stimulus /// regulation of apoptosis /// po…
8012464	1.23334	2.3511	8.21197	6.02091	7.70912e-06	0.000479795	3.71058	LOC100128288	hypothetical protein LOC100128288	---
7953943	1.22942	2.34472	8.53956	6.00098	8.04777e-06	0.000494434	3.66781	GABARAPL1	GABA(A) receptor-associated protein like 1	protein binding /// intracellular /// cytoplasm /// autophagic vacuole /// endoplasmic reticulum /// Golgi apparatus /// microtubule /// membrane /// beta-tubulin binding /// GABA receptor binding
8013450	1.22835	2.34299	7.95345	7.50481	3.63044e-07	4.3483e-05	6.7478	LGALS9C /// LGALS9B /// LGALS9	lectin, galactoside-binding, soluble, 9C /// lectin, galactoside-binding, soluble, 9B /// lectin, galactoside-binding, soluble, 9	signal transducer activity /// sugar binding /// galactose binding /// extracellular region /// cytoplasm /// positive regulation of I-kappaB kinase/NF-kappaB cascade
8047467	1.22739	2.34143	6.07629	10.1458	3.21726e-09	9.73865e-07	11.3989	PFTK2 /// CDK15	PFTAIRE protein kinase 2 /// cyclin-dependent kinase 15	nucleotide binding /// cyclin-dependent protein kinase activity /// protein binding /// ATP binding /// protein amino acid phosphorylation /// transferase activity /// metal ion binding /// magnesium ion binding
8026971	1.22523	2.33792	9.33273	6.47362	2.94272e-06	0.00022482	4.66866	IFI30	interferon, gamma-inducible protein 30	extracellular region /// lysosome /// oxidoreductase activity /// antigen processing and presentation of exogenous peptide antigen via MHC class II /// negative regulation of fibroblast proliferation /// protein stabilization /// oxidation reduction /// lysosome
7902512	1.20085	2.29875	9.45738	4.58512	0.000190437	0.00559663	0.52839	DNAJB4	DnaJ (Hsp40) homolog, subfamily B, member 4	cytoplasm /// plasma membrane /// protein folding /// response to unfolded protein /// response to heat /// heat shock protein binding /// unfolded protein binding /// unfolded protein binding
8094259	1.1974	2.29326	10.3032	8.29299	8.07483e-08	1.33765e-05	8.23595	LAP3	leucine aminopeptidase 3	magnesium ion binding /// aminopeptidase activity /// intracellular /// cytoplasm /// mitochondrion /// proteolysis /// peptidase activity /// metalloexopeptidase activity /// zinc ion binding /// manganese ion binding /// protein metabolic process
8117777	1.19554	2.2903	10.2002	10.748	1.2303e-09	4.5017e-07	12.3323	HLA-G /// HLA-A /// HLA-K /// LOC441528 /// HLA-B /// HLA-H	major histocompatibility complex, class I, G /// major histocompatibility complex, class I, A /// major histocompatibility complex, class I, K (pseudogene) /// hypothetical protein LOC441528 /// major histocompatibility complex, class I, B /// major histocompatibility complex, class I, H (pseudogene)	Golgi membrane /// antigen processing and presentation of peptide antigen via MHC class I /// protein binding /// integral to plasma membrane /// immune response /// immune response /// membrane /// integral to membrane /// antigen processing and presentation /// early endosome membrane /// MHC class I receptor activity /// MHC class I protein complex /// interspecies interaction between organism…
8055702	1.19217	2.28496	9.68193	11.0155	8.12773e-10	3.18387e-07	12.7331	NMI	N-myc (and STAT) interactor	transcription cofactor activity /// protein binding /// cytoplasm /// transcription from RNA polymerase II promoter /// inflammatory response /// JAK-STAT cascade
8162276	1.173	2.2548	9.62786	6.34328	3.8726e-06	0.000285278	4.3955	NFIL3	nuclear factor, interleukin 3 regulated	DNA binding /// transcription factor activity /// transcription corepressor activity /// nucleus /// regulation of transcription, DNA-dependent /// transcription from RNA polymerase II promoter /// immune response /// sequence-specific DNA binding /// protein dimerization activity /// rhythmic process /// transcription factor activity /// nucleus
8177788	1.17265	2.25426	10.3724	8.93175	2.53466e-08	5.08413e-06	9.3782	HLA-E /// HLA-C /// HLA-B	major histocompatibility complex, class I, E /// major histocompatibility complex, class I, C /// major histocompatibility complex, class I, B	antigen processing and presentation of peptide antigen via MHC class I /// protein binding /// membrane fraction /// plasma membrane /// integral to plasma membrane /// defense response /// immune response /// immune response /// membrane /// integral to membrane /// antigen processing and presentation /// MHC class I receptor activity /// MHC class I protein complex /// interspecies interaction …
8179103	1.17265	2.25426	10.3724	8.93175	2.53466e-08	5.08413e-06	9.3782	HLA-E /// HLA-C /// HLA-B	major histocompatibility complex, class I, E /// major histocompatibility complex, class I, C /// major histocompatibility complex, class I, B	antigen processing and presentation of peptide antigen via MHC class I /// protein binding /// membrane fraction /// plasma membrane /// integral to plasma membrane /// defense response /// immune response /// immune response /// membrane /// integral to membrane /// antigen processing and presentation /// MHC class I receptor activity /// MHC class I protein complex /// interspecies interaction …
7923662	1.17034	2.25065	7.99008	5.13384	5.4619e-05	0.00217542	1.76482	PIK3C2B	phosphoinositide-3-kinase, class 2, beta polypeptide	nucleotide binding /// lipid kinase activity /// inositol or phosphatidylinositol kinase activity /// protein binding /// ATP binding /// nucleus /// cytoplasm /// endoplasmic reticulum /// microsome /// cytosol /// plasma membrane /// phosphoinositide 3-kinase complex /// cell communication /// biological_process /// 1-phosphatidylinositol-3-kinase activity /// transferase activity /// phosphotr…
8162533	1.16844	2.24768	8.09182	5.22612	4.43806e-05	0.00186114	1.97079	PTCH1	patched homolog 1 (Drosophila)	neural tube formation /// neural tube closure /// heart morphogenesis /// receptor activity /// patched binding /// protein binding /// integral to plasma membrane /// signal transduction /// smoothened signaling pathway /// pattern specification process /// hedgehog receptor activity /// heparin binding /// cell proliferation /// epidermis development /// regulation of smoothened signaling pathw…
8044375	1.15238	2.2228	8.70459	5.36835	3.22815e-05	0.00146043	2.28683	BCL2L11	BCL2-like 11 (apoptosis facilitator)	peripheral to membrane of membrane fraction /// in utero embryonic development /// B cell homeostasis /// B cell apoptosis /// kidney development /// myeloid cell homeostasis /// protein binding /// membrane fraction /// cytoplasm /// mitochondrion /// mitochondrial outer membrane /// cytosol /// plasma membrane /// apoptosis /// induction of apoptosis /// cell-matrix adhesion /// spermatogenesis…
8148572	1.15198	2.22219	10.9244	9.68335	6.91905e-09	1.89096e-06	10.6517	LY6E	lymphocyte antigen 6 complex, locus E	in utero embryonic development /// plasma membrane /// integral to plasma membrane /// cell surface receptor linked signaling pathway /// adrenal gland development /// anchored to membrane /// organ growth /// norepinephrine metabolic process /// epinephrine secretion /// ventricular cardiac muscle tissue morphogenesis /// cell surface receptor linked signal transduction /// ventricular cardiac m…
7927732	1.15073	2.22027	9.42967	6.27388	4.48628e-06	0.000317154	4.24916	ARID5B	AT rich interactive domain 5B (MRF1-like)	kidney development /// DNA binding /// intracellular /// nucleus /// nitrogen compound metabolic process /// post-embryonic development /// fibroblast migration /// transcription repressor activity /// multicellular organism growth /// regulation of transcription /// negative regulation of transcription, DNA-dependent /// platelet-derived growth factor receptor signaling pathway /// muscle organ …
8049044	1.1498	2.21884	8.4008	8.16976	1.01588e-07	1.59555e-05	8.00907	ARMC9	armadillo repeat containing 9	binding
8091327	1.14926	2.218	10.9819	10.8463	1.0556e-09	3.99412e-07	12.4805	PLSCR1	phospholipid scramblase 1	calcium ion binding /// protein binding /// plasma membrane /// response to virus /// integral to membrane /// phospholipid scrambling /// SH3 domain binding /// phospholipid scramblase activity /// platelet activation
7950391	1.14565	2.21246	8.11965	4.3188	0.000351499	0.00884489	-0.0759152	PGM2L1	phosphoglucomutase 2-like 1	carbohydrate metabolic process /// glucose metabolic process /// transferase activity /// isomerase activity /// intramolecular transferase activity, phosphotransferases /// glucose-1,6-bisphosphate synthase activity
8117890	1.1456	2.21239	10.3126	8.28681	8.1679e-08	1.33974e-05	8.22463	HLA-E /// HLA-C /// HLA-B	major histocompatibility complex, class I, E /// major histocompatibility complex, class I, C /// major histocompatibility complex, class I, B	antigen processing and presentation of peptide antigen via MHC class I /// protein binding /// membrane fraction /// plasma membrane /// integral to plasma membrane /// defense response /// immune response /// immune response /// membrane /// integral to membrane /// antigen processing and presentation /// MHC class I receptor activity /// MHC class I protein complex /// interspecies interaction …
8005458	1.14143	2.20599	7.82693	7.17442	6.98831e-07	7.0097e-05	6.09781	LGALS9C /// LGALS9B /// LGALS9	lectin, galactoside-binding, soluble, 9C /// lectin, galactoside-binding, soluble, 9B /// lectin, galactoside-binding, soluble, 9	signal transducer activity /// sugar binding /// galactose binding /// extracellular region /// cytoplasm /// positive regulation of I-kappaB kinase/NF-kappaB cascade
7988970	1.13691	2.19909	8.70807	4.86435	0.000100577	0.00347037	1.1597	KIAA1370	KIAA1370	---
8137250	1.13621	2.19803	8.34187	5.56831	2.07082e-05	0.00101251	2.72794	GIMAP2	GTPase, IMAP family member 2	nucleotide binding /// GTP binding /// membrane /// integral to membrane
8005809	1.13581	2.19742	6.39029	4.4021	0.000290089	0.00767609	0.113201	LGALS9	lectin, galactoside-binding, soluble, 9	signal transducer activity /// sugar binding /// galactose binding /// extracellular region /// cytoplasm /// positive regulation of I-kappaB kinase/NF-kappaB cascade
7902290	1.13426	2.19506	7.39782	6.99764	9.98107e-07	9.52357e-05	5.7437	CTH	cystathionase (cystathionine gamma-lyase)	cystathionine beta-lyase activity /// cystathionine gamma-lyase activity /// cytoplasm /// cysteine metabolic process /// glutathione metabolic process /// negative regulation of cell proliferation /// cellular amino acid biosynthetic process /// lyase activity /// protein-pyridoxal-5-phosphate linkage via peptidyl-N6-pyridoxal phosphate-L-lysine /// cysteine biosynthetic process /// pyridoxal ph…
8081818	1.13398	2.19463	7.8991	4.51661	0.000222887	0.00625922	0.373065	---	---	---
8102006	1.13204	2.19168	8.52903	7.33179	5.10628e-07	5.57455e-05	6.40933	MANBA	mannosidase, beta A, lysosomal	hydrolase activity, hydrolyzing O-glycosyl compounds /// beta-mannosidase activity /// mannose binding /// soluble fraction /// lysosome /// carbohydrate metabolic process /// protein modification process /// glycoprotein catabolic process /// metabolic process /// cation binding /// beta-mannosidase activity
8012953	1.13045	2.18927	10.2991	6.62443	2.14775e-06	0.000175278	4.98188	TRIM16	tripartite motif-containing 16	DNA binding /// protein binding /// intracellular /// cytoplasm /// zinc ion binding /// transcription activator activity /// PML body /// interleukin-1 binding /// NACHT domain binding /// response to retinoic acid /// positive regulation of gene-specific transcription /// histone H3 acetylation /// histone H4 acetylation /// positive regulation of keratinocyte differentiation /// response to or…
8171297	1.12585	2.1823	11.5164	5.91079	9.78224e-06	0.00056869	3.47367	MID1	midline 1 (Opitz/BBB syndrome)	microtubule cytoskeleton organization /// protein binding /// intracellular /// cytoplasm /// spindle /// microtubule /// microtubule associated complex /// negative regulation of microtubule depolymerization /// pattern specification process /// zinc ion binding /// ligase activity /// metal ion binding /// protein binding /// modification-dependent protein catabolic process
7984001	1.11427	2.16486	8.04133	4.85714	0.000102243	0.00350605	1.14344	GCNT3	glucosaminyl (N-acetyl) transferase 3, mucin type	Golgi membrane /// beta-1,3-galactosyl-O-glycosyl-glycoprotein beta-1,6-N-acetylglucosaminyltransferase activity /// membrane fraction /// Golgi apparatus /// carbohydrate metabolic process /// protein amino acid O-linked glycosylation /// N-acetyllactosaminide beta-1,6-N-acetylglucosaminyltransferase activity /// membrane /// integral to membrane /// transferase activity, transferring glycosyl g…
8121076	1.11412	2.16463	9.89135	5.84202	1.13596e-05	0.000632511	3.32497	PNRC1	proline-rich nuclear receptor coactivator 1	protein binding /// nucleus /// regulation of transcription /// nucleus
8171435	1.10671	2.15355	9.49823	7.55301	3.30374e-07	4.09287e-05	6.84133	PIR	pirin (iron-binding nuclear protein)	transcription cofactor activity /// nucleus /// transcription from RNA polymerase II promoter /// metal ion binding /// iron ion binding /// nucleus
8016739	1.09567	2.13713	10.395	5.21819	4.51781e-05	0.00188508	1.95311	TOB1	transducer of ERBB2, 1	transcription corepressor activity /// SH3/SH2 adaptor activity /// protein binding /// cytoplasm /// SMAD protein nuclear translocation /// negative regulation of cell proliferation /// negative regulation of BMP signaling pathway /// negative regulation of osteoblast differentiation /// SMAD binding
7938012	1.09479	2.13582	7.26429	7.2428	6.09514e-07	6.33696e-05	6.2336	TRIM6 /// TRIM6-TRIM34 /// TRIM34 /// TRIM78P	tripartite motif-containing 6 /// TRIM6-TRIM34 readthrough /// tripartite motif-containing 34 /// tripartite motif-containing 78, pseudogene	molecular_function /// protein binding /// intracellular /// cytoplasm /// zinc ion binding /// metal ion binding /// protein trimerization
7974335	1.09451	2.13541	8.92134	7.41106	4.36528e-07	5.01209e-05	6.56493	---	---	---
7944339	1.09018	2.12901	8.099	5.64504	1.74847e-05	0.000888839	2.89613	---	---	---
7980316	1.08834	2.1263	8.06217	9.48017	9.76254e-09	2.44409e-06	10.3147	TGFB3	transforming growth factor, beta 3	activation of MAPK activity /// response to hypoxia /// in utero embryonic development /// type II transforming growth factor beta receptor binding /// type II transforming growth factor beta receptor binding /// protein binding /// extracellular region /// extracellular space /// nucleus /// cytoplasm /// plasma membrane /// induction of apoptosis /// transforming growth factor beta receptor sig…
8117435	1.0877	2.12535	8.37165	8.14356	1.06698e-07	1.66015e-05	7.96055	BTN3A2	butyrophilin, subfamily 3, member A2	biological_process /// membrane /// integral to membrane
7956097	1.08221	2.11728	9.00836	4.76857	0.000125125	0.00405677	0.943549	SUOX	sulfite oxidase	mitochondrion /// mitochondrial intermembrane space /// cytosol /// response to nutrient /// sulfite oxidase activity /// electron carrier activity /// oxidoreductase activity /// heme binding /// molybdenum ion binding /// molybdopterin cofactor binding /// metal ion binding /// oxidation reduction /// sulfite oxidase activity
8069582	1.07977	2.1137	5.29285	6.50099	2.77865e-06	0.000214665	4.72572	PRSS7 /// TMPRSS15	protease, serine, 7 (enterokinase) /// transmembrane protease, serine 15	serine-type endopeptidase activity /// scavenger receptor activity /// brush border /// proteolysis /// peptidase activity /// membrane /// integral to membrane
7908758	1.07914	2.11278	9.02044	5.86034	1.09154e-05	0.000613935	3.36465	SHISA4	shisa homolog 4 (Xenopus laevis)	membrane /// integral to membrane
8008819	1.07457	2.10609	7.17335	7.36773	4.7554e-07	5.33133e-05	6.47999	YPEL2	yippee-like 2 (Drosophila)	nucleus /// nucleolus
8005475	1.0745	2.106	12.1895	6.01244	7.85132e-06	0.000486826	3.69239	TRIM16 /// TRIM16L	tripartite motif-containing 16 /// tripartite motif-containing 16-like	DNA binding /// protein binding /// intracellular /// cytoplasm /// zinc ion binding /// transcription activator activity /// PML body /// interleukin-1 binding /// NACHT domain binding /// response to retinoic acid /// positive regulation of gene-specific transcription /// histone H3 acetylation /// histone H4 acetylation /// positive regulation of keratinocyte differentiation /// response to or…
7912145	1.06648	2.09432	7.69146	5.35247	3.34459e-05	0.00149317	2.25163	TNFRSF9	tumor necrosis factor receptor superfamily, member 9	receptor activity /// protein binding /// integral to plasma membrane /// induction of apoptosis /// negative regulation of cell proliferation /// membrane /// receptor activity
8041940	1.06616	2.09386	6.35142	7.61039	2.95409e-07	3.74001e-05	6.95225	STON1 /// STON1-GTF2A1L /// GTF2A1L	stonin 1 /// STON1-GTF2A1L readthrough /// general transcription factor IIA, 1-like	DNA binding /// RNA polymerase II transcription factor activity /// transcription coactivator activity /// nucleus /// transcription factor TFIIA complex /// transcription from RNA polymerase II promoter /// transcription initiation from RNA polymerase II promoter /// regulation of transcription /// protein binding /// nucleus /// cytoplasm /// intracellular protein transport /// membrane /// reg…
8059413	1.06395	2.09064	11.4087	7.24009	6.12818e-07	6.33696e-05	6.22823	DOCK10	dedicator of cytokinesis 10	guanyl-nucleotide exchange factor activity /// GTP binding /// GTPase binding
8012931	1.06213	2.08802	7.49773	4.73618	0.000134734	0.00428441	0.87036	TRIM16 /// FBXW10 /// CDRT1	tripartite motif-containing 16 /// F-box and WD repeat domain containing 10 /// CMT1A duplicated region transcript 1	molecular_function /// cellular_component /// biological_process /// DNA binding /// protein binding /// intracellular /// cytoplasm /// zinc ion binding /// transcription activator activity /// PML body /// interleukin-1 binding /// NACHT domain binding /// response to retinoic acid /// positive regulation of gene-specific transcription /// histone H3 acetylation /// histone H4 acetylation /// p…
7986359	1.06017	2.08518	9.79774	4.57672	0.000194143	0.00567052	0.509355	IGF1R	insulin-like growth factor 1 receptor	nucleotide binding /// protein tyrosine kinase activity /// receptor activity /// insulin-like growth factor receptor activity /// insulin receptor binding /// protein binding /// insulin-like growth factor binding /// ATP binding /// microsome /// integral to plasma membrane /// anti-apoptosis /// immune response /// signal transduction /// axonogenesis /// brain development /// positive regulat…
8095870	1.05794	2.08196	9.08315	5.43352	2.79194e-05	0.00130019	2.43103	CCNG2	cyclin G2	cell cycle checkpoint /// cytoplasm /// cell cycle /// mitosis /// cell division
7924465	1.05599	2.07914	8.14607	7.20039	6.63414e-07	6.74546e-05	6.14946	HHIPL2	HHIP-like 2	catalytic activity /// extracellular region /// carbohydrate metabolic process /// oxidoreductase activity, acting on the CH-OH group of donors, quinone or similar compound as acceptor /// quinone binding
7931097	1.05549	2.07843	9.85704	7.42632	4.23588e-07	4.89729e-05	6.59479	HTRA1	HtrA serine peptidase 1	regulation of cell growth /// serine-type endopeptidase activity /// insulin-like growth factor binding /// extracellular region /// extracellular space /// proteolysis /// peptidase activity /// negative regulation of transforming growth factor beta receptor signaling pathway /// negative regulation of BMP signaling pathway /// serine-type endopeptidase activity
8098995	1.05315	2.07505	8.70332	4.91071	9.05107e-05	0.0031853	1.26414	MXD4	MAX dimerization protein 4	negative regulation of transcription from RNA polymerase II promoter /// DNA binding /// transcription corepressor activity /// protein binding /// nucleus /// negative regulation of cell proliferation /// negative regulation of transcription /// transcription regulator activity /// protein binding
8055016	1.04859	2.0685	7.80024	5.05476	6.52946e-05	0.00248187	1.58776	---	---	---
7902527	1.04744	2.06686	7.1461	7.17422	6.99103e-07	7.0097e-05	6.09742	PTGFR	prostaglandin F receptor (FP)	receptor activity /// G-protein coupled receptor activity /// prostaglandin F receptor activity /// extracellular region /// plasma membrane /// integral to plasma membrane /// signal transduction /// G-protein coupled receptor protein signaling pathway /// parturition /// prostaglandin F receptor activity /// G-protein coupled receptor protein signaling pathway
7974689	1.04601	2.06481	7.29286	5.00872	7.24642e-05	0.00268094	1.48448	DACT1	dapper, antagonist of beta-catenin, homolog 1 (Xenopus laevis)	protein binding /// nucleus /// cytoplasm /// multicellular organismal development /// Wnt receptor signaling pathway /// nucleus /// cytoplasm
8098204	1.04511	2.06353	8.65539	6.19444	5.31306e-06	0.000363263	4.08089	CPE	carboxypeptidase E	carboxypeptidase activity /// metallocarboxypeptidase activity /// extracellular region /// plasma membrane /// protein modification process /// proteolysis /// neuropeptide signaling pathway /// metabolic process /// peptidase activity /// metallopeptidase activity /// zinc ion binding /// insulin processing /// metal ion binding
8139832	1.04036	2.05675	5.46308	6.2875	4.35838e-06	0.000311418	4.27794	ZNF117 /// ERV3	zinc finger protein 117 /// endogenous retroviral sequence 3 (includes zinc finger protein H-plk/HPF9)	molecular_function /// structural molecule activity /// cellular_component /// biological_process /// virion /// viral capsid /// viral envelope /// transcription factor activity /// intracellular /// nucleus /// regulation of transcription, DNA-dependent /// zinc ion binding /// metal ion binding
8056060	1.03918	2.05506	7.98065	6.81622	1.44525e-06	0.000127646	5.37577	BAZ2B	bromodomain adjacent to zinc finger domain, 2B	DNA binding /// protein binding /// nucleus /// zinc ion binding /// regulation of transcription /// metal ion binding
8059111	1.03538	2.04965	9.00432	8.17098	1.01356e-07	1.59555e-05	8.01133	ATG9A /// ABCB6	ATG9 autophagy related 9 homolog A (S. cerevisiae) /// ATP-binding cassette, sub-family B (MDR/TAP), member 6	nucleotide binding /// ATP binding /// mitochondrion /// mitochondrial envelope /// mitochondrial outer membrane /// transport /// cellular iron ion homeostasis /// membrane /// integral to membrane /// ATPase activity /// ATPase activity, coupled to transmembrane movement of substances /// ATP-binding cassette (ABC) transporter complex /// transmembrane transport /// autophagic vacuole formation…
8082075	1.03004	2.04208	10.884	7.22793	6.27877e-07	6.47257e-05	6.20413	DTX3L /// PARP9	deltex 3-like (Drosophila) /// poly (ADP-ribose) polymerase family, member 9	NAD+ ADP-ribosyltransferase activity /// protein binding /// nucleus /// nucleus /// cytoplasm /// cell migration /// transferase activity /// ubiquitin-protein ligase activity /// response to DNA damage stimulus /// zinc ion binding /// histone monoubiquitination /// chromatin modification /// ligase activity /// histone binding /// metal ion binding /// protein binding
7908940	1.02354	2.03291	9.68755	4.41281	0.000283016	0.00753324	0.137527	ATP2B4	ATPase, Ca++ transporting, plasma membrane 4	nucleotide binding /// calcium-transporting ATPase activity /// protein binding /// calmodulin binding /// ATP binding /// plasma membrane /// integral to plasma membrane /// ATP biosynthetic process /// transport /// cation transport /// calcium ion transport /// metabolic process /// hydrolase activity /// hydrolase activity, acting on acid anhydrides, catalyzing transmembrane movement of subst…
8168733	1.01662	2.02318	6.69084	5.24947	4.21152e-05	0.00177958	2.02279	---	---	---
8107673	1.01414	2.0197	7.84111	6.4875	2.85833e-06	0.000219801	4.6976	GRAMD3	GRAM domain containing 3	---
7983779	1.01379	2.01921	5.98906	5.82716	1.17334e-05	0.000651145	3.29277	UNC13C	unc-13 homolog C (C. elegans)	cytoplasm /// plasma membrane /// exocytosis /// synaptic transmission /// cell junction /// presynaptic membrane /// synapse /// metal ion binding /// intracellular signaling cascade /// zinc ion binding /// diacylglycerol binding
8139270	1.01189	2.01655	8.03463	6.07173	6.91028e-06	0.000442484	3.8194	LOC100132214 /// RASA4 /// RASA4P /// RASA4B	similar to calcium-promoted Ras inactivator /// RAS p21 protein activator 4 /// RAS p21 protein activator 4 pseudogene /// RAS p21 protein activator 4B	GTPase activator activity /// intracellular /// cytoplasm /// cytosol /// plasma membrane /// metal ion binding /// regulation of small GTPase mediated signal transduction /// intracellular signaling cascade /// zinc ion binding
8068494	1.0006	2.00084	7.85556	6.46269	3.01103e-06	0.0002289	4.64583	---	---	---
8073081	0.997229	1.99616	8.86695	5.95435	8.90129e-06	0.000534029	3.56754	APOBEC3F	apolipoprotein B mRNA editing enzyme, catalytic polypeptide-like 3F	positive regulation of defense response to virus by host /// RNA binding /// cytidine deaminase activity /// transcription, RNA-dependent /// zinc ion binding /// base conversion or substitution editing /// hydrolase activity /// apolipoprotein B mRNA editing enzyme complex /// innate immune response /// negative regulation of retroviral genome replication /// metal ion binding /// negative regul…
7930162	0.996667	1.99538	9.07288	9.23864	1.47939e-08	3.40906e-06	9.90721	C10orf26	chromosome 10 open reading frame 26	membrane /// integral to membrane
7945371	0.995178	1.99333	12.1759	9.23663	1.48456e-08	3.40906e-06	9.90379	IFITM3	interferon induced transmembrane protein 3 (1-8U)	plasma membrane /// immune response /// response to biotic stimulus /// integral to membrane
7921099	0.99	1.98618	8.45555	5.64384	1.75311e-05	0.000889835	2.8935	CRABP2	cellular retinoic acid binding protein 2	retinoic acid binding /// transporter activity /// retinoid binding /// nucleus /// cytoplasm /// regulation of transcription, DNA-dependent /// transport /// signal transduction /// lipid binding /// epidermis development /// retinal binding /// retinol binding /// embryonic forelimb morphogenesis /// retinoic acid metabolic process /// nucleus /// cytoplasm
8162729	0.984572	1.97873	10.2007	4.94107	8.4479e-05	0.00302788	1.33245	TRIM14	tripartite motif-containing 14	molecular_function /// intracellular /// biological_process /// zinc ion binding /// metal ion binding
7910111	0.983377	1.97709	9.50575	8.66788	4.06491e-08	7.5194e-06	8.91317	EPHX1	epoxide hydrolase 1, microsomal (xenobiotic)	epoxide hydrolase activity /// endoplasmic reticulum /// endoplasmic reticulum membrane /// microsome /// response to toxin /// response to organic cyclic substance /// membrane /// integral to membrane /// hydrolase activity /// aromatic compound catabolic process /// cis-stilbene-oxide hydrolase activity /// epoxide hydrolase activity
8149248	0.981771	1.97489	6.75054	4.84321	0.000105537	0.00358945	1.11204	---	---	---
8101701	0.977718	1.96935	7.42685	5.07139	6.28855e-05	0.00240678	1.62504	PPM1K /// PPM1K	protein phosphatase 1K (PP2C domain containing) /// protein phosphatase, Mg2+/Mn2+ dependent, 1K	protein serine/threonine phosphatase activity /// mitochondrion /// mitochondrial matrix /// protein amino acid dephosphorylation /// protein serine/threonine phosphatase complex /// hydrolase activity /// metal ion binding /// magnesium ion binding /// manganese ion binding
8092095	0.977673	1.96929	9.85126	6.94584	1.10887e-06	0.000102846	5.63913	TNIK	TRAF2 and NCK interacting kinase	nucleotide binding /// protein serine/threonine kinase activity /// protein serine/threonine kinase activity /// small GTPase regulator activity /// protein binding /// ATP binding /// cellular_component /// nucleus /// cytoplasm /// protein amino acid phosphorylation /// response to stress /// intracellular protein kinase cascade /// JNK cascade /// Wnt receptor signaling pathway /// transferase…
8125500	0.973524	1.96363	8.39974	7.54878	3.33113e-07	4.09287e-05	6.83314	PSMB8	proteasome (prosome, macropain) subunit, beta type, 8 (large multifunctional peptidase 7)	proteasome complex /// threonine-type endopeptidase activity /// protein binding /// nucleus /// cytoplasm /// proteasome core complex /// immune response /// peptidase activity /// anaphase-promoting complex-dependent proteasomal ubiquitin-dependent protein catabolic process /// interspecies interaction between organisms /// negative regulation of ubiquitin-protein ligase activity involved in mi…
8178855	0.973524	1.96363	8.39974	7.54878	3.33113e-07	4.09287e-05	6.83314	PSMB8	proteasome (prosome, macropain) subunit, beta type, 8 (large multifunctional peptidase 7)	proteasome complex /// threonine-type endopeptidase activity /// protein binding /// nucleus /// cytoplasm /// proteasome core complex /// immune response /// peptidase activity /// anaphase-promoting complex-dependent proteasomal ubiquitin-dependent protein catabolic process /// interspecies interaction between organisms /// negative regulation of ubiquitin-protein ligase activity involved in mi…
8180049	0.973524	1.96363	8.39974	7.54878	3.33113e-07	4.09287e-05	6.83314	PSMB8	proteasome (prosome, macropain) subunit, beta type, 8 (large multifunctional peptidase 7)	proteasome complex /// threonine-type endopeptidase activity /// protein binding /// nucleus /// cytoplasm /// proteasome core complex /// immune response /// peptidase activity /// anaphase-promoting complex-dependent proteasomal ubiquitin-dependent protein catabolic process /// interspecies interaction between organisms /// negative regulation of ubiquitin-protein ligase activity involved in mi…
8141803	0.967695	1.95571	8.03832	10.4142	2.08615e-09	6.87747e-07	11.8202	POLR2J4 /// LOC100286937 /// LOC100132214 /// RASA4 /// RASA4P /// RASA4B	polymerase (RNA) II (DNA directed) polypeptide J4, pseudogene /// similar to HSPC047 protein /// similar to calcium-promoted Ras inactivator /// RAS p21 protein activator 4 /// RAS p21 protein activator 4 pseudogene /// RAS p21 protein activator 4B	GTPase activator activity /// intracellular /// cytoplasm /// cytosol /// plasma membrane /// metal ion binding /// regulation of small GTPase mediated signal transduction /// intracellular signaling cascade /// zinc ion binding
8041197	0.96444	1.95131	10.1593	4.76398	0.000126443	0.00409379	0.933182	YPEL5	yippee-like 5 (Drosophila)	---
8156688	0.96388	1.95055	9.10282	8.46655	5.86341e-08	1.03298e-05	8.55191	TDRD7	tudor domain containing 7	nucleic acid binding /// protein binding /// cytoplasm /// mitochondrial matrix /// germ cell development /// chromatoid body /// P granule /// protein N-terminus binding /// cytoplasm /// ribonucleoprotein complex
8053599	0.955914	1.93981	10.205	5.26282	4.08734e-05	0.00174259	2.0525	INO80B /// WBP1	INO80 complex subunit B /// WW domain binding protein 1	cellular_component /// biological_process /// WW domain binding /// WW domain binding /// nucleus /// nucleolus /// zinc ion binding /// metal ion binding
7928308	0.955907	1.9398	7.72809	5.99015	8.23817e-06	0.000501474	3.64455	DDIT4	DNA-damage-inducible transcript 4	response to hypoxia /// intracellular /// cytoplasm /// apoptosis /// negative regulation of signal transduction
8175393	0.955652	1.93946	6.92896	4.2709	0.00039258	0.00967875	-0.18468	ARHGEF6	Rac/Cdc42 guanine nucleotide exchange factor (GEF) 6	guanyl-nucleotide exchange factor activity /// Rho guanyl-nucleotide exchange factor activity /// GTPase activator activity /// intracellular /// cytosol /// apoptosis /// apoptosis /// JNK cascade /// induction of apoptosis by extracellular signals /// regulation of Rho protein signal transduction /// guanyl-nucleotide exchange factor activity
8119198	0.954053	1.93731	9.58901	8.84354	2.96529e-08	5.74042e-06	9.22381	FTSJD2	FtsJ methyltransferase domain containing 2	nucleic acid binding /// protein binding /// intracellular /// nucleus /// methyltransferase activity /// transferase activity /// methylation
7948493	0.954028	1.93727	7.11474	6.2748	4.47747e-06	0.000317154	4.25112	SLC15A3 /// TMEM132A	solute carrier family 15, member 3 /// transmembrane protein 132A	transporter activity /// lysosomal membrane /// oligopeptide transport /// protein transport /// symporter activity /// peptide:hydrogen symporter activity /// membrane /// integral to membrane /// Golgi membrane /// molecular_function /// cellular_component /// endoplasmic reticulum /// endoplasmic reticulum membrane /// Golgi apparatus /// biological_process /// lysosome
8015914	0.953931	1.93714	8.83566	5.76259	1.35097e-05	0.000725672	3.15258	HDAC5	histone deacetylase 5	histone deacetylase complex /// negative regulation of transcription from RNA polymerase II promoter /// histone deacetylase activity /// protein binding /// nucleus /// cytoplasm /// chromatin organization /// chromatin remodeling /// chromatin silencing /// inflammatory response /// transcription factor binding /// positive regulation of gene-specific transcription from RNA polymerase II promot…
8008321	0.953058	1.93597	7.80015	5.22085	4.49091e-05	0.00187857	1.95904	ACSF2	acyl-CoA synthetase family member 2	nucleotide binding /// ATP binding /// mitochondrion /// lipid metabolic process /// fatty acid metabolic process /// metabolic process /// ligase activity
8035445	0.951828	1.93432	9.41171	5.20958	4.606e-05	0.00190754	1.93393	JUND	jun D proto-oncogene	chromatin /// osteoblast development /// transcription factor activity /// RNA polymerase II transcription factor activity /// protein binding /// nucleus /// regulation of transcription from RNA polymerase II promoter /// sequence-specific DNA binding /// positive regulation of osteoblast differentiation /// protein dimerization activity
8050427	0.950815	1.93296	9.64498	4.52039	0.000220959	0.00621392	0.381637	FAM49A	family with sequence similarity 49, member A	intracellular
7902282	0.933048	1.9093	8.64281	8.54724	5.0596e-08	9.0575e-06	8.69737	HHLA3	HERV-H LTR-associating 3	protein binding
8103389	0.930848	1.9064	6.27049	4.3453	0.000330665	0.0084824	-0.0157604	CTSO	cathepsin O	cysteine-type endopeptidase activity /// proteolysis /// peptidase activity /// cysteine-type endopeptidase activity /// proteolysis
7905067	0.92598	1.89997	9.60555	6.27853	4.44214e-06	0.000315373	4.259	HIST2H4A /// HIST2H4B	histone cluster 2, H4a /// histone cluster 2, H4b	nucleosome /// DNA binding /// protein binding /// nucleus /// nucleoplasm /// chromosome /// chromatin organization /// nucleosome assembly /// negative regulation of megakaryocyte differentiation /// phosphoinositide-mediated signaling
7919627	0.92598	1.89997	9.60555	6.27853	4.44214e-06	0.000315373	4.259	HIST2H4A /// HIST2H4B	histone cluster 2, H4a /// histone cluster 2, H4b	nucleosome /// DNA binding /// protein binding /// nucleus /// nucleoplasm /// chromosome /// chromatin organization /// nucleosome assembly /// negative regulation of megakaryocyte differentiation /// phosphoinositide-mediated signaling
7913655	0.922192	1.89499	11.3712	9.84268	5.29991e-09	1.5213e-06	10.9121	ID3	inhibitor of DNA binding 3, dominant negative helix-loop-helix protein	negative regulation of transcription from RNA polymerase II promoter /// transcription corepressor activity /// nucleus /// regulation of DNA replication /// multicellular organismal development /// heart development /// transcription factor binding /// response to wounding /// negative regulation of transcription /// transcription repressor activity /// protein domain specific binding /// neuron…
8091260	0.918084	1.8896	6.92853	7.35512	4.87553e-07	5.42945e-05	6.45523	SLC9A9	solute carrier family 9 (sodium/hydrogen exchanger), member 9	cation transport /// sodium ion transport /// regulation of pH /// antiporter activity /// solute:hydrogen antiporter activity /// sodium:hydrogen antiporter activity /// membrane /// integral to membrane /// late endosome membrane /// recycling endosome /// transmembrane transport /// sodium:hydrogen antiporter activity /// sodium ion binding
8043377	0.916771	1.88788	10.2207	4.77658	0.000122857	0.0039995	0.961646	INO80B /// WBP1	INO80 complex subunit B /// WW domain binding protein 1	cellular_component /// biological_process /// WW domain binding /// WW domain binding /// nucleus /// nucleolus /// zinc ion binding /// metal ion binding
8167763	0.916146	1.88707	8.13874	5.99496	8.15315e-06	0.000497208	3.65487	TSPYL2	TSPY-like 2	rDNA binding /// protein binding /// nucleus /// nucleolus /// cytoplasm /// nucleosome assembly /// negative regulation of DNA replication /// regulation of signal transduction /// chromatin modification /// negative regulation of cell growth /// regulation of transcription /// negative regulation of cell cycle /// regulation of protein kinase activity /// protein binding /// nucleus /// nucleol…
8011884	0.915255	1.8859	8.63659	8.2873	8.16047e-08	1.33974e-05	8.22553	NLRP1 /// LOC728392	NLR family, pyrin domain containing 1 /// hypothetical protein LOC728392	nucleotide binding /// protein binding /// ATP binding /// intracellular /// nucleus /// cytoplasm /// induction of apoptosis /// induction of apoptosis /// activation of caspase activity /// activation of caspase activity /// defense response /// caspase activator activity /// enzyme binding /// protein domain specific binding /// regulation of apoptosis /// neuron apoptosis
8069505	0.914292	1.88464	7.99953	6.28626	4.36988e-06	0.000311572	4.27532	C21orf15	chromosome 21 open reading frame 15	---
8095545	0.913739	1.88392	8.86739	5.3527	3.34285e-05	0.00149317	2.25215	RUFY3	RUN and FYVE domain containing 3	multicellular organismal development /// nervous system development /// cell differentiation /// filopodium /// growth cone /// negative regulation of axonogenesis
8063382	0.913001	1.88296	8.03377	9.2497	1.45128e-08	3.37924e-06	9.92604	SNAI1	snail homolog 1 (Drosophila)	DNA binding /// protein binding /// intracellular /// nucleus /// multicellular organismal development /// zinc ion binding /// hair follicle morphogenesis /// metal ion binding
8116998	0.912158	1.88186	9.56671	6.60835	2.22078e-06	0.000179044	4.94862	JARID2	jumonji, AT rich interactive domain 2	negative regulation of transcription from RNA polymerase II promoter /// liver development /// DNA binding /// chromatin binding /// protein binding /// intracellular /// nucleus /// multicellular organismal development /// central nervous system development /// negative regulation of cell proliferation /// transcription repressor activity /// chromatin modification /// negative regulation of his…
7939642	0.910783	1.88007	7.86376	5.26344	4.08161e-05	0.00174238	2.0539	CREB3L1	cAMP responsive element binding protein 3-like 1	transcription factor activity /// nucleus /// endoplasmic reticulum /// endoplasmic reticulum membrane /// regulation of transcription, DNA-dependent /// response to unfolded protein /// membrane /// integral to membrane /// sequence-specific DNA binding /// protein dimerization activity
7950810	0.909202	1.87801	6.47703	7.57797	3.14666e-07	3.96873e-05	6.88963	SYTL2	synaptotagmin-like 2	phosphatidylserine binding /// protein binding /// phosphatidylinositol-4,5-bisphosphate binding /// membrane fraction /// cytoplasm /// plasma membrane /// intracellular protein transport /// exocytosis /// vesicle docking during exocytosis /// zinc ion binding /// vesicle-mediated transport /// Rab GTPase binding /// extrinsic to plasma membrane /// neurexin binding /// melanosome /// exocytic …
8130528	0.904816	1.87231	7.98244	6.20711	5.1713e-06	0.000357423	4.1078	RSPH3	radial spoke 3 homolog (Chlamydomonas)	---
8103415	0.902772	1.86966	5.50865	6.30514	4.1983e-06	0.000303234	4.31517	C4orf18 /// FAM198B	chromosome 4 open reading frame 18 /// family with sequence similarity 198, member B	Golgi membrane /// Golgi apparatus /// membrane /// integral to membrane /// Golgi apparatus
8104930	0.9014	1.86788	8.7432	4.5821	0.000191758	0.00563047	0.521565	SLC1A3	solute carrier family 1 (glial high affinity glutamate transporter), member 3	neurotransmitter uptake /// L-glutamate transmembrane transporter activity /// high-affinity glutamate transmembrane transporter activity /// protein binding /// membrane fraction /// mitochondrial inner membrane /// plasma membrane /// glutamate biosynthetic process /// transport /// dicarboxylic acid transport /// synaptic transmission /// sensory perception of sound /// response to light stimu…
8081375	0.900288	1.86644	9.36579	7.28956	5.55303e-07	5.88321e-05	6.32608	FAM55C	family with sequence similarity 55, member C	extracellular region
8144699	0.899031	1.86481	6.61842	5.27887	3.94295e-05	0.00169623	2.08821	---	---	---
8038117	0.898549	1.86419	8.78823	8.60341	4.56832e-08	8.40395e-06	8.79808	DBP	D site of albumin promoter (albumin D-box) binding protein	transcription factor activity /// RNA polymerase II transcription factor activity /// nucleus /// regulation of transcription from RNA polymerase II promoter /// regulation of cell proliferation /// sequence-specific DNA binding /// protein dimerization activity /// rhythmic process
8180232	0.895021	1.85964	7.13545	7.50704	3.61459e-07	4.3483e-05	6.75214	---	---	---
8041422	0.894637	1.85914	6.07599	5.65169	1.72305e-05	0.000879944	2.9107	RASGRP3	RAS guanyl releasing protein 3 (calcium and DAG-regulated)	MAPKKK cascade /// signal transducer activity /// Ras guanyl-nucleotide exchange factor activity /// calcium ion binding /// protein binding /// intracellular /// cytoplasm /// integral to plasma membrane /// small GTPase mediated signal transduction /// Ras protein signal transduction /// Ras GTPase binding /// kinase binding /// diacylglycerol binding /// guanyl-nucleotide exchange factor compl…
7941961	0.892804	1.85678	9.46707	6.17356	5.5553e-06	0.000374443	4.03654	ALDH3B1 /// ALDH3B2	aldehyde dehydrogenase 3 family, member B1 /// aldehyde dehydrogenase 3 family, member B2	3-chloroallyl aldehyde dehydrogenase activity /// aldehyde dehydrogenase [NAD(P)+] activity /// alcohol metabolic process /// cellular aldehyde metabolic process /// lipid metabolic process /// oxidoreductase activity /// oxidation reduction
8116831	0.88769	1.85021	8.08338	4.35788	0.000321207	0.00830588	0.0128178	TFAP2A /// LOC100130275	transcription factor AP-2 alpha (activating enhancer binding protein 2 alpha) /// hypothetical protein LOC100130275	DNA binding /// transcription factor activity /// transcription coactivator activity /// protein binding /// nucleus /// regulation of transcription from RNA polymerase II promoter /// ectoderm development /// anterior neuropore closure /// protein dimerization activity /// embryonic cranial skeleton morphogenesis /// skeletal system morphogenesis /// transcription factor activity /// regulation …
7941269	0.885504	1.84741	9.16345	7.31488	5.28047e-07	5.69009e-05	6.37604	LOC100291851	similar to Putative ubiquitin-like protein FUBI-like protein ENSP00000310146	---
8114814	0.882661	1.84377	10.5833	7.37975	4.64366e-07	5.25918e-05	6.50359	NR3C1	nuclear receptor subfamily 3, group C, member 1 (glucocorticoid receptor)	transcription factor activity /// glucocorticoid receptor activity /// steroid binding /// protein binding /// nucleus /// nucleolus /// cytoplasm /// mitochondrial matrix /// transcription, DNA-dependent /// regulation of transcription, DNA-dependent /// transcription from RNA polymerase II promoter /// signal transduction /// zinc ion binding /// chromatin modification /// sequence-specific DNA…
7975851	0.881336	1.84208	7.97936	6.26984	4.52492e-06	0.000319208	4.24063	C14orf179	chromosome 14 open reading frame 179	---
7995681	0.871586	1.82967	9.74889	9.499	9.45402e-09	2.38478e-06	10.3462	MMP2	matrix metallopeptidase 2 (gelatinase A, 72kDa gelatinase, 72kDa type IV collagenase)	angiogenesis /// response to hypoxia /// blood vessel maturation /// intramembranous ossification /// metalloendopeptidase activity /// protein binding /// extracellular region /// proteinaceous extracellular matrix /// extracellular space /// nucleus /// plasma membrane /// proteolysis /// metabolic process /// peptidase activity /// zinc ion binding /// sarcomere /// collagen catabolic process …
7984103	0.871275	1.82928	9.82711	7.00915	9.7507e-07	9.3835e-05	5.7669	LACTB	lactamase, beta	mitochondrion /// hydrolase activity
7904050	0.867589	1.82461	10.6935	4.8274	0.00010941	0.00367982	1.07637	MOV10	Mov10, Moloney leukemia virus 10, homolog (mouse)	nucleotide binding /// cytoplasmic mRNA processing body /// RNA binding /// helicase activity /// protein binding /// ATP binding /// cytoplasm /// hydrolase activity /// gene silencing by RNA /// mRNA cleavage involved in gene silencing by miRNA /// regulation of transcription /// gene silencing by miRNA, mRNA cleavage
7901931	0.863617	1.81959	8.05155	6.18329	5.44097e-06	0.000368978	4.05722	EFCAB7	EF-hand calcium binding domain 7	calcium ion binding
8006531	0.863238	1.81912	10.5748	5.44482	2.72264e-05	0.00127505	2.456	SLFN5	schlafen family member 5	nucleotide binding /// ATP binding /// nucleus /// cell differentiation
7934920	0.863227	1.8191	10.3348	7.87838	1.76227e-07	2.49206e-05	7.46408	LIPA	lipase A, lysosomal acid, cholesterol esterase	cell morphogenesis /// cytokine production /// sterol esterase activity /// lysosome /// fatty acid metabolic process /// inflammatory response /// cell proliferation /// lipid catabolic process /// sterol metabolic process /// lipase activity /// hydrolase activity /// lung development /// tissue remodeling /// homeostasis of number of cells within a tissue /// sterol esterase activity /// lysos…
8135849	0.86224	1.81786	4.91918	6.3255	4.02107e-06	0.000292975	4.35808	---	---	---
8050801	0.860911	1.81618	4.61206	4.60727	0.000181	0.00538097	0.578589	---	---	---
7994981	0.859173	1.814	9.2692	4.86733	9.98968e-05	0.00345048	1.16642	ORAI3	ORAI calcium release-activated calcium modulator 3	membrane /// integral to membrane
7969677	0.858935	1.8137	11.2188	6.58368	2.33781e-06	0.000186225	4.89755	MBNL2	muscleblind-like 2 (Drosophila)	RNA binding /// nucleus /// cytoplasm /// mRNA processing /// zinc ion binding /// regulation of RNA splicing /// metal ion binding
8000574	0.857875	1.81237	7.92315	5.947	9.04387e-06	0.000540559	3.55173	NUPR1	nuclear protein, transcriptional regulator, 1	molecular_function /// nucleus /// induction of apoptosis /// cell growth /// acute inflammatory response /// response to toxin /// DNA damage response, signal transduction by p53 class mediator resulting in induction of apoptosis /// negative regulation of fibroblast proliferation
7913582	0.85684	1.81107	9.34991	6.58981	2.30817e-06	0.000184305	4.91024	ZNF436 /// C1orf213	zinc finger protein 436 /// chromosome 1 open reading frame 213	DNA binding /// intracellular /// nucleus /// regulation of transcription, DNA-dependent /// zinc ion binding /// metal ion binding
8076547	0.854964	1.80871	7.63831	5.12654	5.55259e-05	0.00220626	1.74848	TTLL1	tubulin tyrosine ligase-like family, member 1	tubulin-tyrosine ligase activity /// cytoplasm /// cytoskeleton /// microtubule /// protein modification process /// ligase activity /// protein polyglutamylation /// tubulin-glutamic acid ligase activity
8097753	0.853997	1.8075	7.98854	6.03037	7.55358e-06	0.000473656	3.73085	DCLK2	doublecortin-like kinase 2	nucleotide binding /// protein serine/threonine kinase activity /// ATP binding /// protein amino acid phosphorylation /// transferase activity /// intracellular signaling cascade
8004266	0.853777	1.80723	8.68598	5.74928	1.39089e-05	0.000741	3.12362	SLC16A13	solute carrier family 16, member 13 (monocarboxylic acid transporter 13)	plasma membrane /// symporter activity /// integral to membrane /// transmembrane transport /// transport
8048523	0.852071	1.80509	8.0931	7.21482	6.44543e-07	6.6035e-05	6.17811	DNAJB2	DnaJ (Hsp40) homolog, subfamily B, member 2	protein folding /// response to unfolded protein /// negative regulation of cell proliferation /// negative regulation of cell growth /// heat shock protein binding /// unfolded protein binding
8072710	0.85204	1.80505	8.92731	7.48793	3.75261e-07	4.44664e-05	6.71497	APOL6	apolipoprotein L, 6	lipid transporter activity /// extracellular region /// cytoplasm /// lipid transport /// lipid binding /// lipoprotein metabolic process
8048976	0.849066	1.80133	8.07552	4.50151	0.00023076	0.00640301	0.338813	---	---	---
7944751	0.846751	1.79845	7.42656	5.83937	1.14253e-05	0.000635108	3.31924	C11orf63	chromosome 11 open reading frame 63	---
8127854	0.846286	1.79787	10.6482	4.7792	0.000122123	0.0039899	0.967576	ME1	malic enzyme 1, NADP(+)-dependent, cytosolic	malic enzyme activity /// malate dehydrogenase (oxaloacetate-decarboxylating) (NADP+) activity /// malate dehydrogenase (oxaloacetate-decarboxylating) (NADP+) activity /// binding /// soluble fraction /// nucleus /// nucleolus /// cytoplasm /// cytosol /// carbohydrate metabolic process /// malate metabolic process /// NADP biosynthetic process /// electron carrier activity /// response to hormon…
8101429	0.845719	1.79716	6.94951	5.58215	2.00846e-05	0.000987826	2.75833	PLAC8	placenta-specific 8	---
7958620	0.841798	1.79228	7.43509	5.38803	3.0895e-05	0.00141501	2.33043	IFT81	intraflagellar transport 81 homolog (Chlamydomonas)	multicellular organismal development /// spermatogenesis /// cell differentiation
8042867	0.841256	1.79161	10.2899	4.49351	0.000235044	0.00651102	0.320667	INO80B /// WBP1	INO80 complex subunit B /// WW domain binding protein 1	cellular_component /// biological_process /// WW domain binding /// WW domain binding /// nucleus /// nucleolus /// zinc ion binding /// metal ion binding
7905938	0.839532	1.78947	11.2183	6.10928	6.37488e-06	0.000419495	3.89963	RAG1AP1	recombination activating gene 1 activating protein 1	nucleus /// DNA recombination /// membrane /// integral to membrane /// positive regulation of gene expression, epigenetic
8111220	0.839432	1.78935	6.42774	5.00446	7.31657e-05	0.00270088	1.47493	CDH18	cadherin 18, type 2	calcium ion binding /// protein binding /// plasma membrane /// cell adhesion /// homophilic cell adhesion /// integral to membrane /// plasma membrane
8117219	0.836948	1.78627	10.5369	6.71537	1.77887e-06	0.000149573	5.16927	ACOT13	acyl-CoA thioesterase 13	cytoplasm /// mitochondrion /// acyl-CoA thioesterase activity /// hydrolase activity /// protein homotetramerization
8164464	0.836608	1.78585	8.38964	5.59623	1.94701e-05	0.000966165	2.78922	ZER1	zer-1 homolog (C. elegans)	ubiquitin-protein ligase activity /// protein binding /// Cul2-RING ubiquitin ligase complex /// regulation of ubiquitin-protein ligase activity /// modification-dependent protein catabolic process
7928354	0.836434	1.78563	8.5641	6.01856	7.74834e-06	0.000481336	3.70553	FAM149B1	family with sequence similarity 149, member B1	---
8014603	0.834666	1.78344	8.8903	6.57087	2.40106e-06	0.0001899	4.871	LOC100134348 /// TBC1D3P2 /// TBC1D3F /// TBC1D3C /// TBC1D3G /// TBC1D3B /// TBC1D3 /// TBC1D3H	similar to TBC1 domain family member 3 (Rab GTPase-activating protein PRC17) (Prostate cancer gene 17 protein) (TRE17 alpha protein) /// TBC1 domain family, member 3 pseudogene 2 /// TBC1 domain family, member 3F /// TBC1 domain family, member 3C /// TBC1 domain family, member 3G /// TBC1 domain family, member 3B /// TBC1 domain family, member 3 /// TBC1 domain family, member 3H	GTPase activator activity /// Rab GTPase activator activity /// intracellular /// regulation of Rab GTPase activity
7906400	0.83233	1.78056	11.7322	4.48769	0.000238214	0.00658789	0.307449	IFI16	interferon, gamma-inducible protein 16	DNA binding /// double-stranded DNA binding /// protein binding /// nucleus /// nucleoplasm /// nucleolus /// cytoplasm /// regulation of transcription, DNA-dependent /// cell proliferation /// response to virus /// transcription repressor activity /// hemopoiesis /// myeloid cell differentiation /// monocyte differentiation /// DNA damage response, signal transduction by p53 class mediator resul…
8106393	0.830332	1.7781	9.19918	4.93122	8.63886e-05	0.00307645	1.31031	F2R	coagulation factor II (thrombin) receptor	activation of MAPKK activity /// connective tissue replacement during inflammatory response /// receptor activity /// G-protein coupled receptor activity /// G-protein coupled receptor activity /// receptor binding /// protein binding /// extracellular region /// Golgi apparatus /// plasma membrane /// plasma membrane /// integral to plasma membrane /// caveola /// activation of caspase activity …
8028652	0.828998	1.77645	8.46617	4.7765	0.000122879	0.0039995	0.961475	ZFP36	zinc finger protein 36, C3H type, homolog (mouse)	DNA binding /// single-stranded RNA binding /// mRNA binding /// protein binding /// nucleus /// cytoplasm /// cytosol /// mRNA catabolic process /// intracellular protein kinase cascade /// zinc ion binding /// AU-rich element binding /// regulation of mRNA stability /// negative regulation of myeloid cell differentiation /// metal ion binding /// negative regulation of inflammatory response ///…
7951545	0.827532	1.77465	6.15272	4.74652	0.00013159	0.00420897	0.893719	EXPH5	exophilin 5	protein binding /// intracellular protein transport /// Rab GTPase binding
8120719	0.825905	1.77265	10.6195	6.98488	1.02428e-06	9.74442e-05	5.71798	CD109	CD109 molecule	serine-type endopeptidase inhibitor activity /// protein binding /// extracellular region /// extracellular space /// plasma membrane /// anchored to membrane
7978644	0.824914	1.77143	10.585	5.89846	1.00477e-05	0.000579821	3.44704	NFKBIA	nuclear factor of kappa light polypeptide gene enhancer in B-cells inhibitor, alpha	protein import into nucleus, translocation /// protein binding /// nucleus /// cytoplasm /// cytosol /// apoptosis /// anti-apoptosis /// cytoplasmic sequestering of NF-kappaB /// transcription factor binding /// nuclear localization sequence binding /// positive regulation of gene-specific transcription from RNA polymerase II promoter /// negative regulation of macrophage derived foam cell diffe…
7978123	0.824247	1.77061	10.728	4.8937	9.40789e-05	0.00328704	1.22584	PSME2	proteasome (prosome, macropain) activator subunit 2 (PA28 beta)	proteasome complex /// proteasome activator complex /// proteasome activator activity /// anaphase-promoting complex-dependent proteasomal ubiquitin-dependent protein catabolic process /// negative regulation of ubiquitin-protein ligase activity involved in mitotic cell cycle /// positive regulation of ubiquitin-protein ligase activity involved in mitotic cell cycle /// proteasome complex /// cyt…
7920664	0.823135	1.76925	6.93148	4.94406	8.39077e-05	0.00301124	1.33917	THBS3	thrombospondin 3	structural molecule activity /// calcium ion binding /// protein binding /// extracellular region /// cell adhesion /// cell-matrix adhesion /// platelet alpha granule lumen /// perinuclear region of cytoplasm /// calcium ion binding /// extracellular region /// cell-matrix adhesion
8046020	0.822334	1.76826	8.52187	5.36628	3.24306e-05	0.0014632	2.28225	SCN2A	sodium channel, voltage-gated, type II, alpha subunit	voltage-gated sodium channel complex /// voltage-gated ion channel activity /// voltage-gated sodium channel activity /// membrane fraction /// integral to plasma membrane /// ion transport /// sodium ion transport /// apoptosis /// nervous system development /// intercalated disc /// membrane /// T-tubule /// axon /// node of Ranvier /// myelination /// transmembrane transport /// voltage-gated …
8006746	0.820874	1.76648	8.98255	6.02438	7.65175e-06	0.000478012	3.71801	LOC100134348 /// TBC1D3P2 /// TBC1D3F /// TBC1D3B /// TBC1D3C /// TBC1D3G /// TBC1D3 /// TBC1D3H	similar to TBC1 domain family member 3 (Rab GTPase-activating protein PRC17) (Prostate cancer gene 17 protein) (TRE17 alpha protein) /// TBC1 domain family, member 3 pseudogene 2 /// TBC1 domain family, member 3F /// TBC1 domain family, member 3B /// TBC1 domain family, member 3C /// TBC1 domain family, member 3G /// TBC1 domain family, member 3 /// TBC1 domain family, member 3H	GTPase activator activity /// Rab GTPase activator activity /// intracellular /// regulation of Rab GTPase activity
7935180	0.817708	1.7626	11.354	5.39396	3.04896e-05	0.00140223	2.34355	PDLIM1	PDZ and LIM domain 1	response to hypoxia /// transcription coactivator activity /// protein binding /// transcription factor complex /// cytoplasm /// cytoskeleton /// response to oxidative stress /// zinc ion binding /// regulation of transcription /// metal ion binding
8141768	0.815555	1.75998	8.22625	8.57331	4.82512e-08	8.68442e-06	8.74416	POLR2J4 /// LOC100132214 /// RASA4 /// RASA4P /// RASA4B	polymerase (RNA) II (DNA directed) polypeptide J4, pseudogene /// similar to calcium-promoted Ras inactivator /// RAS p21 protein activator 4 /// RAS p21 protein activator 4 pseudogene /// RAS p21 protein activator 4B	GTPase activator activity /// intracellular /// cytoplasm /// cytosol /// plasma membrane /// metal ion binding /// regulation of small GTPase mediated signal transduction /// intracellular signaling cascade /// zinc ion binding
8180374	0.815245	1.7596	8.19521	4.75969	0.000127687	0.00412226	0.923503	---	---	---
8014420	0.814895	1.75917	8.86547	6.04445	7.32793e-06	0.000464712	3.76102	LOC100134348 /// TBC1D3P2 /// TBC1D3F /// TBC1D3B /// TBC1D3C /// TBC1D3G /// TBC1D3 /// TBC1D3H	similar to TBC1 domain family member 3 (Rab GTPase-activating protein PRC17) (Prostate cancer gene 17 protein) (TRE17 alpha protein) /// TBC1 domain family, member 3 pseudogene 2 /// TBC1 domain family, member 3F /// TBC1 domain family, member 3B /// TBC1 domain family, member 3C /// TBC1 domain family, member 3G /// TBC1 domain family, member 3 /// TBC1 domain family, member 3H	GTPase activator activity /// Rab GTPase activator activity /// intracellular /// regulation of Rab GTPase activity
7984353	0.811313	1.75481	8.22812	7.99889	1.40131e-07	2.09234e-05	7.69095	SMAD6	SMAD family member 6	transcription factor activity /// protein binding /// intracellular /// nucleus /// transcription factor complex /// cytoplasm /// cytosol /// regulation of transcription, DNA-dependent /// immune response /// zygotic specification of dorsal/ventral axis /// negative regulation of SMAD protein complex assembly /// BMP signaling pathway /// negative regulation of transforming growth factor beta re…
7970595	0.809802	1.75297	6.79992	4.5165	0.000222946	0.00625922	0.372804	C1QTNF9B /// PCOTH	C1q and tumor necrosis factor related protein 9B /// prostate collagen triple helix	extracellular region /// cytoplasm
8174201	0.809151	1.75218	10.3076	7.46841	3.89922e-07	4.56207e-05	6.67695	BEX1	brain expressed, X-linked 1	nucleus /// cytoplasm /// multicellular organismal development /// nervous system development /// cell differentiation
7996807	0.806973	1.74954	7.00859	7.82695	1.94445e-07	2.70897e-05	7.36666	ZFP90	zinc finger protein 90 homolog (mouse)	DNA binding /// intracellular /// nucleus /// regulation of transcription, DNA-dependent /// proteolysis /// metallopeptidase activity /// zinc ion binding /// metal ion binding
8019716	0.805513	1.74777	8.92082	5.87156	1.06524e-05	0.000602194	3.38891	LOC100134348 /// TBC1D3P2 /// TBC1D3F /// TBC1D3B /// TBC1D3C /// TBC1D3G /// TBC1D3 /// TBC1D3H	similar to TBC1 domain family member 3 (Rab GTPase-activating protein PRC17) (Prostate cancer gene 17 protein) (TRE17 alpha protein) /// TBC1 domain family, member 3 pseudogene 2 /// TBC1 domain family, member 3F /// TBC1 domain family, member 3B /// TBC1 domain family, member 3C /// TBC1 domain family, member 3G /// TBC1 domain family, member 3 /// TBC1 domain family, member 3H	GTPase activator activity /// Rab GTPase activator activity /// intracellular /// regulation of Rab GTPase activity
8014633	0.803313	1.7451	8.90547	5.9971	8.11554e-06	0.000495822	3.65947	TBC1D3F /// TBC1D3B /// TBC1D3C /// TBC1D3G /// TBC1D3 /// TBC1D3H	TBC1 domain family, member 3F /// TBC1 domain family, member 3B /// TBC1 domain family, member 3C /// TBC1 domain family, member 3G /// TBC1 domain family, member 3 /// TBC1 domain family, member 3H	GTPase activator activity /// Rab GTPase activator activity /// intracellular /// regulation of Rab GTPase activity
7908178	0.799079	1.73999	7.85319	5.60751	1.89916e-05	0.000948069	2.81396	C1orf26	chromosome 1 open reading frame 26	---
7954029	0.799038	1.73994	9.7316	6.02755	7.59964e-06	0.000475649	3.72481	CDKN1B	cyclin-dependent kinase inhibitor 1B (p27, Kip1)	regulation of cyclin-dependent protein kinase activity /// G1/S transition of mitotic cell cycle /// protein kinase inhibitor activity /// cyclin-dependent protein kinase inhibitor activity /// transforming growth factor beta receptor, cytoplasmic mediator activity /// protein binding /// nucleus /// cytoplasm /// cytosol /// induction of apoptosis /// cell cycle /// cell cycle arrest /// negativ…
8096919	0.799024	1.73992	7.15753	4.97629	7.79908e-05	0.00284431	1.41163	ALPK1	alpha-kinase 1	protein serine/threonine kinase activity /// ATP binding /// protein amino acid phosphorylation /// kinase activity /// transferase activity
7958174	0.79827	1.73901	12.6018	6.07827	6.81371e-06	0.000437274	3.8334	TXNRD1	thioredoxin reductase 1	mesoderm formation /// thioredoxin-disulfide reductase activity /// nucleus /// cytoplasm /// cytosol /// transport /// signal transduction /// gastrulation /// cell proliferation /// electron carrier activity /// protein disulfide oxidoreductase activity /// oxidoreductase activity /// electron transport chain /// cell redox homeostasis /// FAD binding /// NADP or NADPH binding /// thioredoxin-d…
8176133	0.797368	1.73793	11.2722	4.7126	0.0001422	0.00447527	0.817029	G6PD	glucose-6-phosphate dehydrogenase	cytokine production /// glucose-6-phosphate dehydrogenase activity /// glucose-6-phosphate dehydrogenase activity /// binding /// glucose binding /// glucose binding /// cytoplasm /// centrosome /// cytosol /// cytosol /// carbohydrate metabolic process /// glucose metabolic process /// pentose-phosphate shunt /// lipid metabolic process /// cholesterol biosynthetic process /// NADPH regeneration…
7938812	0.795367	1.73552	7.29616	5.8804	1.04495e-05	0.000594547	3.40803	TMEM86A /// IGSF22	transmembrane protein 86A /// immunoglobulin superfamily, member 22	membrane /// integral to membrane
8088550	0.793536	1.73332	8.32979	6.17418	5.54799e-06	0.000374443	4.03785	PRICKLE2	prickle homolog 2 (Drosophila)	nucleus /// cytoplasm /// zinc ion binding /// membrane /// apicolateral plasma membrane /// lateral plasma membrane /// nuclear membrane /// establishment or maintenance of epithelial cell apical/basal polarity /// metal ion binding
7920531	0.791061	1.73035	11.1374	9.01457	2.18935e-08	4.61384e-06	9.52222	ADAR	adenosine deaminase, RNA-specific	DNA binding /// double-stranded RNA binding /// double-stranded RNA adenosine deaminase activity /// double-stranded RNA adenosine deaminase activity /// intracellular /// nucleus /// nucleus /// nucleolus /// cytoplasm /// mRNA processing /// base conversion or substitution editing /// hydrolase activity /// gene silencing by RNA /// metal ion binding /// nucleolus /// zinc ion binding
7956038	0.790184	1.7293	8.23349	6.33179	3.96784e-06	0.000290367	4.37133	LOC440104 /// MMP19	hypothetical LOC440104 /// matrix metallopeptidase 19	angiogenesis /// metalloendopeptidase activity /// calcium ion binding /// extracellular region /// proteinaceous extracellular matrix /// proteolysis /// multicellular organismal development /// metabolic process /// peptidase activity /// zinc ion binding /// cell differentiation /// collagen catabolic process
8014437	0.78835	1.7271	8.86891	5.9402	9.17815e-06	0.00054465	3.53707	LOC100134348 /// TBC1D3P2 /// TBC1D3F /// TBC1D3B /// TBC1D3C /// TBC1D3G /// TBC1D3 /// TBC1D3H	similar to TBC1 domain family member 3 (Rab GTPase-activating protein PRC17) (Prostate cancer gene 17 protein) (TRE17 alpha protein) /// TBC1 domain family, member 3 pseudogene 2 /// TBC1 domain family, member 3F /// TBC1 domain family, member 3B /// TBC1 domain family, member 3C /// TBC1 domain family, member 3G /// TBC1 domain family, member 3 /// TBC1 domain family, member 3H	GTPase activator activity /// Rab GTPase activator activity /// intracellular /// regulation of Rab GTPase activity
7896337	0.78755	1.72614	8.26716	4.41872	0.000279195	0.00747896	0.150925	---	---	---
8003607	0.786517	1.72491	8.29371	8.34213	7.37245e-08	1.25887e-05	8.32583	C17orf97	chromosome 17 open reading frame 97	---
8053576	0.784685	1.72272	9.07512	4.53475	0.000213788	0.0060738	0.414199	RNF103	ring finger protein 103	protein binding /// central nervous system development /// zinc ion binding /// membrane /// integral to membrane /// metal ion binding
7914557	0.782966	1.72066	7.77204	5.8133	1.20932e-05	0.000665568	3.26273	SYNC	syncoilin, intermediate filament protein	structural molecule activity /// protein binding /// cytoplasm /// cytosol /// intermediate filament /// Z disc /// sarcolemma /// intermediate filament-based process /// synapse /// perinuclear region of cytoplasm
8043244	0.782488	1.72009	7.28693	6.49457	2.81625e-06	0.000217066	4.71235	ATOH8	atonal homolog 8 (Drosophila)	DNA binding /// nucleus /// multicellular organismal development /// nervous system development /// cell differentiation /// transcription regulator activity /// regulation of transcription
8078014	0.780421	1.71763	11.2204	6.56772	2.41689e-06	0.0001907	4.86446	SLC6A6	solute carrier family 6 (neurotransmitter transporter, taurine), member 6	beta-alanine transmembrane transporter activity /// beta-alanine transport /// taurine:sodium symporter activity /// plasma membrane /// integral to plasma membrane /// cellular amino acid metabolic process /// transport /// neurotransmitter transport /// amino acid transport /// amino acid transmembrane transporter activity /// symporter activity /// taurine transport /// integral to membrane //…
7949904	0.780103	1.71725	8.94935	4.70497	0.000144701	0.00453508	0.799787	UNC93B1	unc-93 homolog B1 (C. elegans)	membrane /// integral to membrane
8045539	0.780051	1.71719	6.4476	4.53479	0.000213766	0.0060738	0.414298	KYNU	kynureninase (L-kynurenine hydrolase)	soluble fraction /// cytoplasm /// mitochondrion /// cytosol /// cytosol /// tryptophan catabolic process /// metabolic process /// NAD biosynthetic process /// hydrolase activity /// pyridine nucleotide biosynthetic process /// tryptophan catabolic process to kynurenine /// tryptophan catabolic process to acetyl-CoA /// NAD metabolic process /// quinolinate biosynthetic process /// pyridoxal pho…
8013771	0.77469	1.71082	9.43168	8.76666	3.40262e-08	6.40096e-06	9.08837	TLCD1	TLC domain containing 1	membrane /// integral to membrane
7913824	0.773472	1.70938	8.75176	4.63006	0.000171784	0.00518574	0.630216	C1orf63	chromosome 1 open reading frame 63	---
8094911	0.771255	1.70675	10.0424	5.38299	3.12446e-05	0.00142709	2.31925	ATP10D	ATPase, class V, type 10D	nucleotide binding /// magnesium ion binding /// phospholipid-translocating ATPase activity /// ATP binding /// ATP biosynthetic process /// cation transport /// metabolic process /// ATPase activity, coupled to transmembrane movement of ions, phosphorylative mechanism /// phospholipid transport /// membrane /// integral to membrane /// hydrolase activity /// hydrolase activity, acting on acid an…
7995926	0.770649	1.70604	8.07564	6.41065	3.35928e-06	0.000250794	4.53696	NLRC5	NLR family, CARD domain containing 5	nucleotide binding /// protein binding /// ATP binding /// cytoplasm
8150714	0.770601	1.70598	9.64466	5.06748	6.34427e-05	0.00242532	1.61629	PCMTD1	protein-L-isoaspartate (D-aspartate) O-methyltransferase domain containing 1	protein-L-isoaspartate (D-aspartate) O-methyltransferase activity /// cytoplasm /// protein modification process
7954460	0.769952	1.70521	9.80762	4.70473	0.000144781	0.00453508	0.79924	LYRM5	LYR motif containing 5	---
7980537	0.769488	1.70466	6.15617	4.9827	7.6865e-05	0.00280941	1.42604	STON2	stonin 2	protein binding /// nucleolus /// cytoplasm /// intracellular protein transport /// membrane /// regulation of endocytosis /// clathrin adaptor complex /// cytoplasm
8058570	0.768044	1.70296	7.61793	5.71294	1.50618e-05	0.00079228	3.04444	C2orf67	chromosome 2 open reading frame 67	---
8019655	0.767778	1.70265	8.89402	6.07973	6.79236e-06	0.000437274	3.83653	TBC1D3F /// TBC1D3C /// TBC1D3G /// TBC1D3B /// TBC1D3 /// TBC1D3H	TBC1 domain family, member 3F /// TBC1 domain family, member 3C /// TBC1 domain family, member 3G /// TBC1 domain family, member 3B /// TBC1 domain family, member 3 /// TBC1 domain family, member 3H	GTPase activator activity /// Rab GTPase activator activity /// intracellular /// regulation of Rab GTPase activity
8057418	0.766913	1.70162	8.28872	6.75276	1.64678e-06	0.00013988	5.24599	ZNF385B	zinc finger protein 385B	nucleic acid binding /// intracellular /// nucleus /// zinc ion binding /// metal ion binding
7897236	0.766217	1.7008	8.08189	7.52694	3.47647e-07	4.24015e-05	6.79078	KCNAB2	potassium voltage-gated channel, shaker-related subfamily, beta member 2	voltage-gated ion channel activity /// voltage-gated potassium channel activity /// cytoplasm /// ion transport /// potassium ion transport /// potassium channel regulator activity /// integral to membrane /// oxidoreductase activity /// juxtaparanode region of axon /// transmembrane transport /// oxidation reduction /// potassium ion binding
7972826	0.765126	1.69952	8.20564	4.33622	0.000337661	0.0086088	-0.0363749	C13orf29	chromosome 13 open reading frame 29	---
8014376	0.763834	1.698	8.83772	6.19603	5.29496e-06	0.00036277	4.08428	LOC100134348 /// TBC1D3P2 /// TBC1D3F /// TBC1D3B /// TBC1D3C /// TBC1D3G /// TBC1D3 /// TBC1D3H	similar to TBC1 domain family member 3 (Rab GTPase-activating protein PRC17) (Prostate cancer gene 17 protein) (TRE17 alpha protein) /// TBC1 domain family, member 3 pseudogene 2 /// TBC1 domain family, member 3F /// TBC1 domain family, member 3B /// TBC1 domain family, member 3C /// TBC1 domain family, member 3G /// TBC1 domain family, member 3 /// TBC1 domain family, member 3H	GTPase activator activity /// Rab GTPase activator activity /// intracellular /// regulation of Rab GTPase activity
7999364	0.763402	1.69749	6.43349	5.81091	1.21565e-05	0.000667948	3.25754	GRIN2A	glutamate receptor, ionotropic, N-methyl D-aspartate 2A	regulation of action potential /// startle response /// response to amphetamine /// receptor activity /// N-methyl-D-aspartate selective glutamate receptor activity /// transporter activity /// extracellular-glutamate-gated ion channel activity /// calcium channel activity /// protein binding /// plasma membrane /// integral to plasma membrane /// transport /// ion transport /// calcium ion trans…
8061305	0.761176	1.69487	8.20896	6.88604	1.25268e-06	0.000114275	5.51792	C20orf19 /// PLK1S1	chromosome 20 open reading frame 19 /// polo-like kinase 1 substrate 1	protein binding /// cytoplasm /// centrosome /// cytoskeleton /// spindle organization /// protein kinase binding /// spindle pole body organization
7944049	0.754015	1.68648	8.92368	4.56059	0.000201468	0.0058333	0.472788	SIDT2	SID1 transmembrane family, member 2	membrane /// integral to membrane
8175288	0.753676	1.68608	8.5102	5.02482	6.98702e-05	0.00260231	1.52061	MOSPD1	motile sperm domain containing 1	structural molecule activity /// membrane /// integral to membrane
7948630	0.752101	1.68424	10.1253	6.45868	3.03648e-06	0.000230309	4.63746	FADS3	fatty acid desaturase 3	molecular_function /// membrane fraction /// endoplasmic reticulum /// endoplasmic reticulum membrane /// unsaturated fatty acid biosynthetic process /// transport /// membrane /// integral to membrane /// oxidoreductase activity /// oxidoreductase activity, acting on paired donors, with oxidation of a pair of donors resulting in the reduction of molecular oxygen to two molecules of water /// hem…
7979984	0.752071	1.68421	8.87636	4.37735	0.000307111	0.00800511	0.0570212	ZFYVE1	zinc finger, FYVE domain containing 1	phosphatidylinositol binding /// phosphatidylinositol-3,4,5-trisphosphate binding /// endoplasmic reticulum /// Golgi apparatus /// Golgi stack /// zinc ion binding /// phosphatidylinositol-3,4-bisphosphate binding /// metal ion binding /// perinuclear region of cytoplasm
8007637	0.75013	1.68194	9.42205	4.91031	9.05931e-05	0.0031853	1.26323	FZD2	frizzled homolog 2 (Drosophila)	receptor activity /// non-G-protein coupled 7TM receptor activity /// G-protein coupled receptor activity /// protein binding /// integral to plasma membrane /// establishment of tissue polarity /// signal transduction /// G-protein coupled receptor protein signaling pathway /// G-protein signaling, coupled to cGMP nucleotide second messenger /// elevation of cytosolic calcium ion concentration /…
7986383	0.748158	1.67965	7.18393	5.50466	2.38404e-05	0.00114218	2.58796	IGF1R	insulin-like growth factor 1 receptor	nucleotide binding /// protein tyrosine kinase activity /// receptor activity /// insulin-like growth factor receptor activity /// insulin receptor binding /// protein binding /// insulin-like growth factor binding /// ATP binding /// microsome /// integral to plasma membrane /// anti-apoptosis /// immune response /// signal transduction /// axonogenesis /// brain development /// positive regulat…
8097305	0.747479	1.67886	6.13724	4.41244	0.000283257	0.00753324	0.136687	---	---	---
7899851	0.746815	1.67808	7.80515	6.47452	2.93719e-06	0.00022482	4.67053	ADC	arginine decarboxylase	molecular_function /// cellular_component /// cytosol /// polyamine biosynthetic process /// spermatogenesis /// arginine decarboxylase activity /// lyase activity /// protein binding /// mitochondrion /// ornithine metabolic process /// arginine decarboxylase activity /// ornithine decarboxylase activator activity
7962151	0.746714	1.67797	9.52809	5.10611	5.81436e-05	0.00226809	1.70279	DENND5B	DENN/MADD domain containing 5B	membrane /// integral to membrane
7920839	0.745211	1.67622	8.85634	5.00522	7.3041e-05	0.00269928	1.47662	RIT1	Ras-like without CAAX 1	nucleotide binding /// GTPase activity /// protein binding /// calmodulin binding /// GTP binding /// intracellular /// plasma membrane /// signal transduction /// small GTPase mediated signal transduction /// GTP binding /// plasma membrane /// signal transduction /// small GTPase mediated signal transduction
7976084	0.744586	1.67549	7.02749	5.75198	1.38271e-05	0.000739004	3.12949	SPATA7	spermatogenesis associated 7	spermatogenesis /// visual perception /// response to stimulus
7963054	0.742754	1.67337	10.5012	4.71038	0.000142923	0.00449378	0.812012	TUBA1A	tubulin, alpha 1a	nucleotide binding /// GTPase activity /// structural molecule activity /// GTP binding /// cytosol /// cytoplasmic microtubule /// microtubule-based movement /// protein domain specific binding /// protein polymerization /// protein complex
7967486	0.741498	1.67191	7.29605	4.7213	0.000139398	0.00439122	0.83671	CCDC92	coiled-coil domain containing 92	---
8108447	0.741247	1.67162	10.1656	5.42664	2.83502e-05	0.0013129	2.41582	CXXC5	CXXC finger 5	DNA binding /// signal transducer activity /// nucleus /// cytoplasm /// zinc ion binding /// positive regulation of I-kappaB kinase/NF-kappaB cascade /// metal ion binding
7984631	0.740598	1.67087	6.85033	5.46645	2.59495e-05	0.00122559	2.50373	C15orf34	chromosome 15 open reading frame 34	---
8014397	0.740234	1.67045	8.53204	5.85889	1.095e-05	0.000614844	3.3615	LOC100134348 /// TBC1D3P2 /// TBC1D3F /// TBC1D3B /// TBC1D3C /// TBC1D3G /// TBC1D3 /// TBC1D3H	similar to TBC1 domain family member 3 (Rab GTPase-activating protein PRC17) (Prostate cancer gene 17 protein) (TRE17 alpha protein) /// TBC1 domain family, member 3 pseudogene 2 /// TBC1 domain family, member 3F /// TBC1 domain family, member 3B /// TBC1 domain family, member 3C /// TBC1 domain family, member 3G /// TBC1 domain family, member 3 /// TBC1 domain family, member 3H	GTPase activator activity /// Rab GTPase activator activity /// intracellular /// regulation of Rab GTPase activity
8139840	0.739956	1.67012	6.42468	4.74704	0.000131431	0.00420793	0.894915	ERV3	endogenous retroviral sequence 3 (includes zinc finger protein H-plk/HPF9)	molecular_function /// structural molecule activity /// cellular_component /// biological_process /// virion /// viral capsid /// viral envelope
8012257	0.738358	1.66828	10.9372	5.23401	4.36015e-05	0.00183308	1.98837	TP53	tumor protein p53	protein import into nucleus, translocation /// negative regulation of transcription from RNA polymerase II promoter /// DNA strand annealing activity /// in utero embryonic development /// release of cytochrome c from mitochondria /// T cell proliferation during immune response /// B cell lineage commitment /// response to tumor cell /// T cell lineage commitment /// DNA binding /// chromatin bin…
8082965	0.736571	1.66621	7.71849	4.75441	0.000129238	0.00415492	0.911554	MRAS	muscle RAS oncogene homolog	nucleotide binding /// GTPase activity /// GTP binding /// intracellular /// plasma membrane /// signal transduction /// Ras protein signal transduction /// multicellular organismal development /// muscle organ development /// actin cytoskeleton organization /// GTP-dependent protein binding /// GTPase activity /// plasma membrane
8120927	0.736277	1.66587	7.68146	4.3687	0.000313295	0.00813812	0.0373811	RWDD2A	RWD domain containing 2A	---
8019622	0.735982	1.66553	8.93954	4.88267	9.64702e-05	0.00336353	1.20098	TMEM106A /// FLJ77644	transmembrane protein 106A /// hypothetical LOC728772	molecular_function /// cellular_component /// biological_process /// membrane /// integral to membrane
8036908	0.733799	1.66301	8.03542	6.90103	1.21493e-06	0.000111136	5.54834	SERTAD3	SERTA domain containing 3	protein binding /// nucleus /// transcription activator activity /// negative regulation of cell growth /// positive regulation of transcription
8171161	0.732331	1.66132	8.50971	4.89808	9.31472e-05	0.00326133	1.2357	ARSE	arylsulfatase E (chondrodysplasia punctata 1)	skeletal system development /// arylsulfatase activity /// Golgi apparatus /// Golgi stack /// metabolic process /// hydrolase activity /// metal ion binding /// calcium ion binding
7983360	0.731617	1.6605	11.8472	6.20687	5.17398e-06	0.000357423	4.10728	B2M	beta-2-microglobulin	Golgi membrane /// antigen processing and presentation of peptide antigen via MHC class I /// protein binding /// extracellular region /// Golgi apparatus /// plasma membrane /// plasma membrane /// immune response /// early endosome membrane /// MHC class I protein complex
7910950	0.730483	1.65919	5.48997	4.40187	0.000290242	0.00767609	0.11268	KMO /// OPN3	kynurenine 3-monooxygenase (kynurenine 3-hydroxylase) /// opsin 3	monooxygenase activity /// kynurenine 3-monooxygenase activity /// kynurenine 3-monooxygenase activity /// mitochondrion /// mitochondrial outer membrane /// mitochondrial inner membrane /// cytosol /// electron carrier activity /// response to salt stress /// membrane /// integral to membrane /// NAD(P)H oxidase activity /// pyridine nucleotide biosynthetic process /// tryptophan catabolic proce…
7942520	0.727297	1.65553	6.46555	5.61747	1.8579e-05	0.000933069	2.83579	---	---	---
7951807	0.727035	1.65523	9.45084	5.88607	1.03216e-05	0.000591529	3.42028	CADM1 /// LOC100132764	cell adhesion molecule 1 /// hypothetical LOC100132764	liver development /// T cell mediated cytotoxicity /// receptor binding /// receptor binding /// protein binding /// plasma membrane /// plasma membrane /// cell-cell junction /// apoptosis /// immune response /// cell adhesion /// homophilic cell adhesion /// heterophilic cell-cell adhesion /// multicellular organismal development /// spermatogenesis /// synapse assembly /// synaptic vesicle ///…
8019778	0.724528	1.65236	9.70038	4.62351	0.000174382	0.00524043	0.615384	PCYT2	phosphate cytidylyltransferase 2, ethanolamine	ethanolamine-phosphate cytidylyltransferase activity /// cellular_component /// phospholipid biosynthetic process /// biosynthetic process /// transferase activity /// nucleotidyltransferase activity
8124040	0.722137	1.64962	8.95282	4.91247	9.0149e-05	0.00317715	1.2681	ATXN1	ataxin 1	RNA binding /// protein binding /// nucleus /// nucleoplasm /// nucleolus /// cytoplasm /// RNA processing /// protein C-terminus binding /// cell death /// poly(U) RNA binding /// nuclear matrix /// negative regulation of transcription /// transcription repressor activity /// poly(G) RNA binding /// nuclear RNA export factor complex /// nuclear inclusion body /// identical protein binding /// in…
7956613	0.721835	1.64928	10.768	5.15567	5.19981e-05	0.00209357	1.8136	TSPAN31	tetraspanin 31	membrane fraction /// integral to plasma membrane /// positive regulation of cell proliferation /// membrane
8007483	0.719866	1.64703	8.90918	5.01055	7.21646e-05	0.00267282	1.48858	TMEM106A /// FLJ77644	transmembrane protein 106A /// hypothetical LOC728772	molecular_function /// cellular_component /// biological_process /// membrane /// integral to membrane
7971015	0.71653	1.64322	8.20498	6.04536	7.3135e-06	0.000464712	3.76298	SMAD9	SMAD family member 9	response to hypoxia /// Mullerian duct regression /// transcription factor activity /// protein binding /// intracellular /// nucleus /// nucleoplasm /// transcription factor complex /// cytoplasm /// cytosol /// regulation of transcription, DNA-dependent /// transforming growth factor beta receptor signaling pathway /// BMP signaling pathway /// BMP signaling pathway /// transforming growth fact…
8154785	0.716065	1.6427	11.2554	6.84367	1.36615e-06	0.000122942	5.43173	CHMP5	chromatin modifying protein 5	regulation of receptor recycling /// protein binding /// nucleus /// cytoplasm /// endosome /// cytosol /// lysosome organization /// endosome to lysosome transport /// endosome membrane /// protein transport /// membrane
8019280	0.716055	1.64268	9.74986	4.81219	0.000113271	0.00375654	1.04204	PCYT2	phosphate cytidylyltransferase 2, ethanolamine	ethanolamine-phosphate cytidylyltransferase activity /// cellular_component /// phospholipid biosynthetic process /// biosynthetic process /// transferase activity /// nucleotidyltransferase activity
8058295	0.715934	1.64255	8.85294	4.25574	0.000406558	0.0099758	-0.21909	ALS2	amyotrophic lateral sclerosis 2 (juvenile)	behavioral fear response /// in utero embryonic development /// ruffle /// receptor recycling /// guanyl-nucleotide exchange factor activity /// Ran guanyl-nucleotide exchange factor activity /// protein binding /// intracellular /// cytoplasm /// early endosome /// microsome /// centrosome /// cytosol /// response to oxidative stress /// endosome organization /// endosome organization /// axonog…
8121749	0.715002	1.64149	6.51375	5.55162	2.14863e-05	0.0010429	2.69128	GJA1	gap junction protein, alpha 1, 43kDa	Golgi membrane /// signal transducer activity /// protein binding /// Golgi apparatus /// plasma membrane /// plasma membrane /// integral to plasma membrane /// gap junction /// connexon complex /// transport /// muscle contraction /// cell-cell signaling /// heart development /// ion transmembrane transporter activity /// gap junction assembly /// transmembrane transporter activity /// cell jun…
8048940	0.714205	1.64058	10.2778	6.79232	1.51799e-06	0.000131284	5.32696	SP100	SP100 nuclear antigen	negative regulation of transcription from RNA polymerase II promoter /// DNA binding /// transcription coactivator activity /// transcription corepressor activity /// protein binding /// nucleus /// chromosome /// DNA damage response, signal transduction by p53 class mediator resulting in transcription of p21 class mediator /// PML body /// kinase binding /// protein domain specific binding /// r…
8011480	0.711368	1.63736	8.45201	5.11983	5.63719e-05	0.00222424	1.73348	CAMKK1	calcium/calmodulin-dependent protein kinase kinase 1, alpha	nucleotide binding /// calmodulin-dependent protein kinase activity /// calmodulin binding /// ATP binding /// nucleus /// cytoplasm /// cytosol /// protein amino acid phosphorylation /// transferase activity /// calmodulin-dependent protein kinase activity
8021685	0.711104	1.63706	5.21846	5.50037	2.40682e-05	0.00114764	2.57851	CCDC102B	coiled-coil domain containing 102B	---
8127094	0.708648	1.63427	6.29624	5.42451	2.84849e-05	0.00131731	2.41111	GSTA4	glutathione S-transferase alpha 4	glutathione transferase activity /// cytoplasm /// metabolic process /// transferase activity
8149250	0.70666	1.63202	9.49482	4.40368	0.000289032	0.00765624	0.116798	PRAGMIN /// SGK223	homolog of rat pragma of Rnd2 /// homolog of rat pragma of Rnd2	nucleotide binding /// non-membrane spanning protein tyrosine kinase activity /// ATP binding /// protein amino acid phosphorylation /// transferase activity
8155121	0.70622	1.63152	9.73123	4.62499	0.000173792	0.00522742	0.618731	NPR2	natriuretic peptide receptor B/guanylate cyclase B (atrionatriuretic peptide receptor B)	nucleotide binding /// guanylate cyclase activity /// protein tyrosine kinase activity /// receptor activity /// transmembrane receptor activity /// ATP binding /// GTP binding /// membrane fraction /// plasma membrane /// cGMP biosynthetic process /// protein amino acid phosphorylation /// signal transduction /// cell surface receptor linked signaling pathway /// receptor guanylyl cyclase signal…
8136388	0.704318	1.62937	7.82531	4.54012	0.000211167	0.00603022	0.426373	TMEM140	transmembrane protein 140	membrane /// integral to membrane
8018975	0.704035	1.62905	11.2791	7.74364	2.28217e-07	3.06659e-05	7.20802	LGALS3BP	lectin, galactoside-binding, soluble, 3 binding protein	scavenger receptor activity /// protein binding /// extracellular region /// proteinaceous extracellular matrix /// extracellular space /// nucleus /// cellular defense response /// cell adhesion /// signal transduction /// membrane /// intracellular membrane-bounded organelle /// scavenger receptor activity
7980958	0.703872	1.62887	10.4652	5.99726	8.11279e-06	0.000495822	3.6598	LGMN	legumain	cysteine-type endopeptidase activity /// protein serine/threonine kinase activity /// cytoplasm /// lysosome /// late endosome /// proteolysis /// peptidase activity /// negative regulation of multicellular organism growth /// intracellular membrane-bounded organelle /// apical part of cell
8115099	0.701929	1.62668	7.49472	5.09763	5.92669e-05	0.00229698	1.68381	PDGFRB	platelet-derived growth factor receptor, beta polypeptide	nucleotide binding /// in utero embryonic development /// kidney development /// tissue homeostasis /// receptor activity /// platelet activating factor receptor activity /// platelet-derived growth factor receptor activity /// platelet-derived growth factor beta-receptor activity /// vascular endothelial growth factor receptor activity /// platelet-derived growth factor receptor binding /// prot…
7982597	0.701842	1.62658	13.0913	6.65449	2.0178e-06	0.000166304	5.04395	THBS1	thrombospondin 1	activation of MAPK activity /// response to hypoxia /// phosphatidylserine binding /// negative regulation of endothelial cell proliferation /// negative regulation of endothelial cell proliferation /// glycoprotein binding /// negative regulation of cell-matrix adhesion /// fibronectin binding /// sprouting angiogenesis /// chronic inflammatory response /// negative regulation of antigen process…
7953442	0.69937	1.6238	7.76345	5.77829	1.3054e-05	0.000707913	3.18671	GPR162	G protein-coupled receptor 162	receptor activity /// G-protein coupled receptor activity /// plasma membrane /// signal transduction /// G-protein coupled receptor protein signaling pathway /// integral to membrane
7984124	0.698426	1.62273	7.89324	4.659	0.000160759	0.00491495	0.69576	APH1B	anterior pharynx defective 1 homolog B (C. elegans)	protein binding /// plasma membrane /// apoptosis /// Notch signaling pathway /// peptidase activity /// induction of apoptosis by extracellular signals /// integral to membrane /// protein processing /// transport vesicle /// membrane protein intracellular domain proteolysis /// positive regulation of catalytic activity /// membrane
8007493	0.697185	1.62134	7.96728	4.87446	9.82882e-05	0.00341975	1.18249	ARL4D	ADP-ribosylation factor-like 4D	nucleotide binding /// GTPase activity /// GTP binding /// intracellular /// nucleus /// nucleolus /// small GTPase mediated signal transduction /// protein secretion
8065758	0.696397	1.62045	6.90725	5.25532	4.15661e-05	0.00176085	2.03582	FLJ38773	hypothetical protein FLJ38773	---
8159127	0.696269	1.62031	9.80088	5.4118	2.93018e-05	0.00135321	2.38302	RXRA	retinoid X receptor, alpha	liver development /// placenta development /// DNA binding /// double-stranded DNA binding /// transcription factor activity /// ligand-regulated transcription factor activity /// steroid hormone receptor activity /// retinoic acid receptor activity /// transcription coactivator activity /// retinoid-X receptor activity /// steroid binding /// protein binding /// nucleus /// regulation of transcr…
7919971	0.696004	1.62001	9.38615	4.82837	0.000109167	0.00367535	1.07857	RFX5	regulatory factor X, 5 (influences HLA class II expression)	negative regulation of transcription from RNA polymerase II promoter /// DNA binding /// transcription factor activity /// protein binding /// nucleus /// regulation of transcription, DNA-dependent /// nucleus
8171791	0.69589	1.61988	5.29716	4.39526	0.000294698	0.00776926	0.0976668	SMPX	small muscle protein, X-linked	nucleus /// cytoplasm /// striated muscle contraction
7960654	0.691852	1.61536	9.68082	5.59969	1.93221e-05	0.00096025	2.7968	ING4	inhibitor of growth family, member 4	histone acetyltransferase complex /// transcription coactivator activity /// protein binding /// nucleus /// DNA replication /// protein amino acid acetylation /// apoptosis /// DNA damage response, signal transduction by p53 class mediator resulting in transcription of p21 class mediator /// cell cycle /// cell cycle arrest /// zinc ion binding /// negative regulation of cell proliferation /// c…
8058552	0.690278	1.61359	11.4319	5.70065	1.54734e-05	0.000807552	3.01763	IDH1	isocitrate dehydrogenase 1 (NADP+), soluble	magnesium ion binding /// isocitrate dehydrogenase (NADP+) activity /// soluble fraction /// cytoplasm /// peroxisome /// cytosol /// carbohydrate metabolic process /// glyoxylate cycle /// tricarboxylic acid cycle /// isocitrate metabolic process /// 2-oxoglutarate metabolic process /// NADPH regeneration /// glutathione metabolic process /// response to oxidative stress /// female gonad develop…
8047403	0.689085	1.61226	6.69529	5.71086	1.51306e-05	0.000794641	3.03991	CASP10	caspase 10, apoptosis-related cysteine peptidase	cysteine-type endopeptidase activity /// protein binding /// proteolysis /// induction of apoptosis /// peptidase activity /// induction of apoptosis by extracellular signals /// identical protein binding /// regulation of apoptosis /// positive regulation of I-kappaB kinase/NF-kappaB cascade /// cysteine-type endopeptidase activity
8163328	0.686163	1.609	7.74631	6.19752	5.27819e-06	0.000362366	4.08744	PTGR1	prostaglandin reductase 1	alcohol dehydrogenase (NAD) activity /// binding /// cytoplasm /// leukotriene metabolic process /// zinc ion binding /// response to toxin /// oxidoreductase activity /// 2-alkenal reductase activity /// 15-oxoprostaglandin 13-oxidase activity /// oxidation reduction
8020110	0.685981	1.6088	12.2064	4.48073	0.000242055	0.00666641	0.291673	RAB31	RAB31, member RAS oncogene family	nucleotide binding /// GTPase activity /// GTP binding /// plasma membrane /// small GTPase mediated signal transduction /// protein transport
7975799	0.683632	1.60618	7.88819	5.59405	1.95641e-05	0.000968687	2.78443	FLVCR2	feline leukemia virus subgroup C cellular receptor family, member 2	plasma membrane /// integral to membrane /// transmembrane transport /// transport
8133938	0.682901	1.60536	8.26625	4.53893	0.000211745	0.00603635	0.423678	CROT	carnitine O-octanoyltransferase	peroxisome /// peroxisomal matrix /// generation of precursor metabolites and energy /// lipid metabolic process /// fatty acid metabolic process /// transport /// acyltransferase activity /// carnitine O-octanoyltransferase activity /// transferase activity /// peroxisome /// fatty acid metabolic process /// carnitine O-octanoyltransferase activity /// fatty acid transport
8120932	0.679742	1.60185	6.22954	5.65787	1.69981e-05	0.000870747	2.9242	PRSS35	protease, serine, 35	catalytic activity /// serine-type endopeptidase activity /// extracellular region /// proteolysis
8066431	0.678824	1.60083	9.51123	5.73502	1.43502e-05	0.000763286	3.09257	ADA	adenosine deaminase	response to hypoxia /// in utero embryonic development /// trophectodermal cell differentiation /// purine nucleoside binding /// liver development /// placenta development /// germinal center B cell differentiation /// positive regulation of germinal center formation /// negative regulation of leukocyte migration /// negative regulation of mature B cell apoptosis /// adenosine deaminase activity…
7991512	0.678197	1.60014	6.37525	4.38747	0.000300035	0.00786635	0.0799847	C15orf51	dynamin 1 pseudogene	---
8117685	0.677692	1.59958	7.24529	7.13019	7.63715e-07	7.56828e-05	6.00962	ZKSCAN3	zinc finger with KRAB and SCAN domains 3	transcription factor activity /// protein binding /// intracellular /// nucleus /// regulation of transcription, DNA-dependent /// zinc ion binding /// metal ion binding
7895074	0.676435	1.59819	9.52733	4.8532	0.000103163	0.0035267	1.13457	---	---	---
8013479	0.673178	1.59458	8.74994	5.60441	1.91218e-05	0.000953142	2.80716	CCDC144A /// CCDC144B /// LOC100134159 /// CCDC144NL /// CCDC144C	coiled-coil domain containing 144A /// coiled-coil domain containing 144B /// similar to Coiled-coil domain containing 144B /// coiled-coil domain containing 144 family, N-terminal like /// coiled-coil domain containing 144C	---
8177834	0.671297	1.5925	8.47593	6.84007	1.37625e-06	0.000123517	5.42441	C6orf134	chromosome 6 open reading frame 134	---
7958828	0.671126	1.59232	9.52116	5.68274	1.60937e-05	0.000833392	2.97856	TRAFD1	TRAF-type zinc finger domain containing 1	protein binding /// intracellular /// zinc ion binding /// metal ion binding
8049670	0.670784	1.59194	9.64101	7.99437	1.41336e-07	2.10093e-05	7.68247	GPC1	glypican 1	extracellular region /// proteinaceous extracellular matrix /// extracellular space /// plasma membrane /// integral to plasma membrane /// anchored to membrane /// heparan sulfate proteoglycan binding /// extracellular space /// plasma membrane
8032608	0.669144	1.59013	9.85837	4.67565	0.000154746	0.00477091	0.733436	C19orf28	chromosome 19 open reading frame 28	membrane /// integral to membrane /// transmembrane transport /// transport
8041676	0.669074	1.59005	6.82167	6.04262	7.35691e-06	0.000464712	3.7571	DYNC2LI1	dynein, cytoplasmic 2, light intermediate chain 1	motor activity /// cytoplasm /// cytoskeleton /// microtubule /// cilium /// multicellular organismal development /// cell projection organization /// dynein complex /// cilium axoneme /// determination of left/right symmetry /// cilium assembly
7976216	0.668715	1.58966	8.91582	5.94624	9.05883e-06	0.000540559	3.55009	C14orf159	chromosome 14 open reading frame 159	mitochondrion
8022872	0.668444	1.58936	7.2589	4.42764	0.000273516	0.00734456	0.171181	ZNF397OS /// ZNF397	zinc finger protein 397 opposite strand /// zinc finger protein 397	transcription factor activity /// intracellular /// nucleus /// cytoplasm /// regulation of transcription, DNA-dependent /// zinc ion binding /// metal ion binding /// nucleus /// nucleolus /// cytoplasm
7947947	0.668194	1.58908	6.44901	4.29156	0.000374296	0.00932853	-0.137757	AGBL2	ATP/GTP binding protein-like 2	metallocarboxypeptidase activity /// nucleolus /// cytoplasm /// cytoskeleton /// proteolysis /// peptidase activity /// metallopeptidase activity /// zinc ion binding /// metal ion binding /// cytoplasm
8068361	0.667484	1.5883	11.3183	4.85234	0.000103365	0.00353001	1.13262	SLC5A3	solute carrier family 5 (sodium/myo-inositol cotransporter), member 3	transporter activity /// myo-inositol:sodium symporter activity /// plasma membrane /// integral to plasma membrane /// inositol metabolic process /// transport /// ion transport /// sodium ion transport /// peripheral nervous system development /// symporter activity /// myo-inositol transport /// integral to membrane /// regulation of respiratory gaseous exchange /// transmembrane transport ///…
8077688	0.666949	1.58771	8.29204	4.98302	7.68097e-05	0.00280941	1.42676	IL17RC	interleukin 17 receptor C	receptor activity /// plasma membrane /// integral to membrane
7987840	0.666434	1.58715	10.4391	7.51252	3.57602e-07	4.32984e-05	6.76278	VPS39	vacuolar protein sorting 39 homolog (S. cerevisiae)	small GTPase regulator activity /// protein binding /// cytoplasm /// lysosomal membrane /// endosome /// protein transport /// membrane /// HOPS complex /// late endosome membrane /// lysosome
8027398	0.664879	1.58544	8.40642	5.19099	4.8025e-05	0.00197365	1.89247	PLEKHF1	pleckstrin homology domain containing, family F (with FYVE domain) member 1	nucleus /// cytoplasm /// lysosome /// apoptosis /// induction of apoptosis /// zinc ion binding /// metal ion binding /// perinuclear region of cytoplasm
8037005	0.664668	1.5852	10.7371	7.05172	8.94587e-07	8.78674e-05	5.8525	TGFB1	transforming growth factor, beta 1	response to hypoxia /// morphogenesis of a branching structure /// negative regulation of protein amino acid phosphorylation /// positive regulation of protein amino acid phosphorylation /// hemopoietic progenitor cell differentiation /// connective tissue replacement during inflammatory response /// tolerance induction to self antigen /// type II transforming growth factor beta receptor binding …
7939665	0.661864	1.58213	10.6638	4.75943	0.000127765	0.00412226	0.9229	MDK	midkine (neurite growth-promoting factor 2)	extracellular region /// signal transduction /// multicellular organismal development /// nervous system development /// growth factor activity /// heparin binding /// response to wounding /// cell differentiation /// adrenal gland development /// positive regulation of cell division /// cell proliferation
7939723	0.66056	1.5807	8.40088	5.01556	7.13505e-05	0.00264561	1.49983	C11orf49	chromosome 11 open reading frame 49	---
8117965	0.658367	1.57829	8.55057	6.67062	1.95142e-06	0.000161521	5.07721	C6orf134	chromosome 6 open reading frame 134	---
8179149	0.658367	1.57829	8.55057	6.67062	1.95142e-06	0.000161521	5.07721	C6orf134	chromosome 6 open reading frame 134	---
8156060	0.657447	1.57729	10.2203	5.2296	4.40348e-05	0.00184896	1.97855	TLE4	transducin-like enhancer of split 4 (E(sp1) homolog, Drosophila)	molecular_function /// nucleus /// biological_process /// Wnt receptor signaling pathway /// regulation of transcription
7943376	0.657097	1.57691	7.00842	5.37269	3.19704e-05	0.00145109	2.29645	KIAA1377	KIAA1377	protein binding
8028930	0.656703	1.57648	8.43296	6.90651	1.2014e-06	0.000110201	5.55947	RAB4B /// MIA	RAB4B, member RAS oncogene family /// melanoma inhibitory activity	protein binding /// extracellular region /// extracellular space /// cell-matrix adhesion /// growth factor activity /// cell proliferation /// extracellular matrix organization /// nucleotide binding /// GTPase activity /// GTP binding /// intracellular /// plasma membrane /// small GTPase mediated signal transduction /// protein transport /// vesicle-mediated transport
7973564	0.655768	1.57545	10.978	7.48469	3.77654e-07	4.45913e-05	6.70867	PSME1	proteasome (prosome, macropain) activator subunit 1 (PA28 alpha)	proteasome complex /// cytoplasm /// proteasome activator complex /// proteasome activator activity /// anaphase-promoting complex-dependent proteasomal ubiquitin-dependent protein catabolic process /// negative regulation of ubiquitin-protein ligase activity involved in mitotic cell cycle /// positive regulation of ubiquitin-protein ligase activity involved in mitotic cell cycle /// proteasome c…
8116610	0.655587	1.57526	9.56484	6.60505	2.23607e-06	0.000179841	4.9418	NQO2 /// LOC401233	NAD(P)H dehydrogenase, quinone 2 /// similar to HIV TAT specific factor 1; cofactor required for Tat activation of HIV-1 transcription	dihydronicotinamide riboside quinone reductase activity /// cytoplasm /// NADPH dehydrogenase (quinone) activity /// electron carrier activity /// metal ion binding /// coenzyme binding /// oxidation reduction /// zinc ion binding
8042144	0.655484	1.57514	8.48929	4.83448	0.000107659	0.00363592	1.09234	REL	v-rel reticuloendotheliosis viral oncogene homolog (avian)	cytokine production /// transcription factor activity /// protein binding /// nucleus /// positive regulation of I-kappaB kinase/NF-kappaB cascade /// positive regulation of interleukin-12 biosynthetic process /// positive regulation of transcription, DNA-dependent /// transcription factor activity /// regulation of transcription, DNA-dependent
8161839	0.655442	1.5751	5.78275	4.48537	0.000239488	0.00661565	0.302189	C9orf95	chromosome 9 open reading frame 95	nucleotide binding /// ATP binding /// transferase activity /// pyridine nucleotide biosynthetic process /// metal ion binding /// ribosylnicotinamide kinase activity /// magnesium ion binding
8097829	0.654115	1.57365	6.60527	5.42894	2.82052e-05	0.00130801	2.42091	FHDC1	FH2 domain containing 1	actin binding /// cellular component organization /// actin cytoskeleton organization
8106986	0.653535	1.57302	11.6618	5.53664	2.22099e-05	0.00107273	2.65836	RHOBTB3	Rho-related BTB domain containing 3	nucleotide binding /// protein binding /// ATP binding /// Golgi apparatus /// transport /// hydrolase activity /// ATPase activity /// Rab GTPase binding /// retrograde transport, endosome to Golgi
8178977	0.651094	1.57036	11.2923	7.7142	2.41558e-07	3.19173e-05	7.15172	TAPBP	TAP binding protein (tapasin)	Golgi membrane /// protein binding /// endoplasmic reticulum /// endoplasmic reticulum membrane /// microsome /// protein complex assembly /// retrograde vesicle-mediated transport, Golgi to ER /// immune response /// peptide antigen-transporting ATPase activity /// membrane /// integral to membrane /// antigen processing and presentation of endogenous peptide antigen via MHC class I /// MHC clas…
7919305	0.650066	1.56924	9.87559	4.30536	0.000362568	0.00905658	-0.106431	PRKAB2	protein kinase, AMP-activated, beta 2 non-catalytic subunit	protein binding /// nucleoplasm /// cytosol /// cAMP-dependent protein kinase complex /// fatty acid biosynthetic process /// signal transduction /// protein kinase binding /// AMP-activated protein kinase complex /// regulation of fatty acid oxidation
7949719	0.649997	1.56916	7.75284	6.81945	1.43571e-06	0.000127646	5.38236	PC	pyruvate carboxylase	nucleotide binding /// pyruvate carboxylase activity /// ATP binding /// soluble fraction /// cytoplasm /// mitochondrion /// mitochondrial inner membrane /// mitochondrial matrix /// gluconeogenesis /// oxaloacetate metabolic process /// metabolic process /// lipid biosynthetic process /// biotin binding /// ligase activity /// carboxylic acid binding /// metal ion binding /// pyruvate carboxyla…
8144802	0.649908	1.56907	8.30814	4.53265	0.000214822	0.00609317	0.409435	PDGFRL	platelet-derived growth factor receptor-like	platelet activating factor receptor activity /// platelet-derived growth factor beta-receptor activity /// cellular_component /// extracellular region /// biological_process
8074399	0.647657	1.56662	8.66197	5.36705	3.23753e-05	0.00146269	2.28395	CLTCL1	clathrin, heavy chain-like 1	signal transducer activity /// structural molecule activity /// protein binding /// intracellular protein transport /// receptor-mediated endocytosis /// anatomical structure morphogenesis /// membrane /// vesicle-mediated transport /// clathrin coat of trans-Golgi network vesicle /// clathrin coat of coated pit /// cytoplasmic vesicle membrane /// cytoplasmic vesicle
8095341	0.64551	1.56429	8.80524	6.79458	1.51095e-06	0.000131284	5.33158	---	---	---
8102065	0.645452	1.56423	7.08661	5.04027	6.74688e-05	0.0025413	1.55528	BDH2	3-hydroxybutyrate dehydrogenase, type 2	3-hydroxybutyrate dehydrogenase activity /// binding /// cytoplasm /// mitochondrion /// fatty acid beta-oxidation /// oxidoreductase activity /// NAD or NADH binding /// oxidation reduction
8180166	0.643914	1.56256	11.4552	7.63823	2.79848e-07	3.59772e-05	7.00589	TAPBP	TAP binding protein (tapasin)	Golgi membrane /// protein binding /// endoplasmic reticulum /// endoplasmic reticulum membrane /// microsome /// protein complex assembly /// retrograde vesicle-mediated transport, Golgi to ER /// immune response /// peptide antigen-transporting ATPase activity /// membrane /// integral to membrane /// antigen processing and presentation of endogenous peptide antigen via MHC class I /// MHC clas…
7953518	0.643202	1.56179	8.88573	5.28004	3.93259e-05	0.00169616	2.09082	LOC171220	destrin-2 pseudogene	---
8167369	0.643087	1.56167	7.65662	7.3409	5.01487e-07	5.52915e-05	6.42726	HDAC6	histone deacetylase 6	histone deacetylase complex /// protein polyubiquitination /// actin binding /// histone deacetylase activity /// protein binding /// nucleus /// cytoplasm /// microtubule /// microtubule associated complex /// caveola /// protein amino acid deacetylation /// misfolded or incompletely synthesized protein catabolic process /// intracellular protein transport /// negative regulation of microtubule …
8001564	0.64277	1.56132	7.71348	6.54995	2.50822e-06	0.000196509	4.82757	DOK4	docking protein 4	MAPKKK cascade /// transmembrane receptor protein tyrosine kinase signaling protein activity /// insulin receptor binding /// transmembrane receptor protein tyrosine kinase signaling pathway /// nervous system development
8002403	0.642516	1.56105	9.52938	5.88743	1.02913e-05	0.000591529	3.42321	MTSS1L	metastasis suppressor 1-like	actin binding /// signal transduction /// cytoskeletal adaptor activity /// SH3 domain binding /// filopodium assembly
7917503	0.642056	1.56055	9.0731	5.0858	6.08709e-05	0.00233774	1.65733	GBP3	guanylate binding protein 3	nucleotide binding /// GTPase activity /// GTP binding /// membrane /// integral to membrane /// immune response
8061073	0.639451	1.55774	7.71846	4.59431	0.000186461	0.0054992	0.549226	---	---	---
8163348	0.639393	1.55767	4.06767	4.85754	0.000102148	0.00350605	1.14435	C9orf84	chromosome 9 open reading frame 84	---
8125713	0.638395	1.5566	10.4119	7.96834	1.48486e-07	2.1974e-05	7.63363	TAPBP	TAP binding protein (tapasin)	Golgi membrane /// protein binding /// endoplasmic reticulum /// endoplasmic reticulum membrane /// microsome /// protein complex assembly /// retrograde vesicle-mediated transport, Golgi to ER /// immune response /// peptide antigen-transporting ATPase activity /// membrane /// integral to membrane /// antigen processing and presentation of endogenous peptide antigen via MHC class I /// MHC clas…
8012079	0.636761	1.55483	9.23482	5.94741	9.03601e-06	0.000540559	3.5526	DVL2	dishevelled, dsh homolog 2 (Drosophila)	neural tube closure /// signal transducer activity /// protein binding /// intracellular /// nucleus /// cytoplasm /// cytoplasm /// transcription from RNA polymerase II promoter /// multicellular organismal development /// segment specification /// imaginal disc pattern formation /// heart development /// Wnt receptor signaling pathway /// identical protein binding /// neural tube closure /// si…
7919815	0.636305	1.55434	6.97802	4.32976	0.000342727	0.00870548	-0.0510371	CTSK	cathepsin K	intramembranous ossification /// cysteine-type endopeptidase activity /// protein binding /// extracellular space /// cytoplasm /// lysosome /// proteolysis /// peptidase activity /// cysteine-type peptidase activity /// bone resorption /// cysteine-type endopeptidase activity /// proteolysis
7992518	0.635618	1.5536	9.06083	4.78089	0.000121654	0.00398377	0.971388	RAB26	RAB26, member RAS oncogene family	nucleotide binding /// protein binding /// GTP binding /// GTP binding /// cellular_component /// plasma membrane /// small GTPase mediated signal transduction /// biological_process /// protein transport /// regulation of exocytosis /// intrinsic to plasma membrane /// exocrine system development
8125139	0.634136	1.55201	10.1804	6.04311	7.34917e-06	0.000464712	3.75815	NEU1	sialidase 1 (lysosomal sialidase)	exo-alpha-sialidase activity /// protein binding /// lysosome /// lysosomal membrane /// plasma membrane /// metabolic process /// cytoplasmic membrane-bounded vesicle /// hydrolase activity, acting on glycosyl bonds /// lysosomal lumen /// exo-alpha-sialidase activity /// cytoplasmic vesicle
8179851	0.634136	1.55201	10.1804	6.04311	7.34917e-06	0.000464712	3.75815	NEU1	sialidase 1 (lysosomal sialidase)	exo-alpha-sialidase activity /// protein binding /// lysosome /// lysosomal membrane /// plasma membrane /// metabolic process /// cytoplasmic membrane-bounded vesicle /// hydrolase activity, acting on glycosyl bonds /// lysosomal lumen /// exo-alpha-sialidase activity /// cytoplasmic vesicle
7941639	0.633925	1.55178	8.18016	5.03712	6.79515e-05	0.00255083	1.54822	DPP3 /// BBS1	dipeptidyl-peptidase 3 /// Bardet-Biedl syndrome 1	retina homeostasis /// protein binding /// cytoplasm /// plasma membrane /// cilium /// BBSome /// sensory cilium assembly /// cilium assembly /// photoreceptor cell maintenance /// response to stimulus /// cilium membrane /// aminopeptidase activity /// proteolysis /// peptidase activity /// metallopeptidase activity /// dipeptidyl-peptidase activity /// metal ion binding /// proteolysis /// dip…
8086953	0.633708	1.55155	12.0134	5.70364	1.5372e-05	0.000803518	3.02417	SHISA5	shisa homolog 5 (Xenopus laevis)	signal transducer activity /// nucleus /// endoplasmic reticulum /// endoplasmic reticulum membrane /// apoptosis /// membrane /// integral to membrane /// nuclear membrane /// positive regulation of I-kappaB kinase/NF-kappaB cascade
8142554	0.633523	1.55135	8.85081	4.36865	0.000313334	0.00813812	0.03726	AASS	aminoadipate-semialdehyde synthase	binding /// mitochondrion /// lysine catabolic process /// oxidoreductase activity /// L-lysine catabolic process /// saccharopine dehydrogenase (NADP+, L-lysine-forming) activity /// saccharopine dehydrogenase (NAD+, L-glutamate-forming) activity /// protein tetramerization /// oxidation reduction /// electron carrier activity
8012349	0.632501	1.55025	7.89372	5.88845	1.02684e-05	0.000591529	3.42542	PER1	period homolog 1 (Drosophila)	signal transducer activity /// protein binding /// nucleus /// cytoplasm /// regulation of transcription, DNA-dependent /// signal transduction /// circadian rhythm /// entrainment of circadian clock /// negative regulation of transcription /// circadian rhythm
7906954	0.631329	1.54899	6.86189	6.00096	8.04826e-06	0.000494434	3.66775	PBX1	pre-B-cell leukemia homeobox 1	urogenital system development /// branching involved in ureteric bud morphogenesis /// DNA binding /// transcription factor activity /// protein binding /// nucleus /// transcription factor complex /// nucleolus /// cytoplasm /// regulation of transcription, DNA-dependent /// steroid biosynthetic process /// sex differentiation /// positive regulation of cell proliferation /// organ morphogenesis…
7909954	0.631249	1.54891	7.337	4.26712	0.000396014	0.00975303	-0.193247	DISP1	dispatched homolog 1 (Drosophila)	patched ligand maturation /// determination of left/right symmetry /// hedgehog receptor activity /// embryonic pattern specification /// dorsal/ventral pattern formation /// peptide transporter activity /// peptide transport /// membrane /// integral to membrane /// multicellular organismal development
8015049	0.630332	1.54792	5.43495	4.95711	8.14575e-05	0.00295135	1.36854	KRT222	keratin 222	structural molecule activity /// intermediate filament
8090314	0.630068	1.54764	8.87462	5.30627	3.70837e-05	0.00161832	2.14911	ALDH1L1	aldehyde dehydrogenase 1 family, member L1	acyl carrier activity /// catalytic activity /// cytoplasm /// one-carbon metabolic process /// methyltransferase activity /// biosynthetic process /// 10-formyltetrahydrofolate catabolic process /// formyltetrahydrofolate dehydrogenase activity /// oxidoreductase activity /// hydroxymethyl-, formyl- and related transferase activity /// cofactor binding /// oxidation reduction /// 10-formyltetrah…
8020179	0.627983	1.5454	9.45417	6.44944	3.096e-06	0.000233758	4.61815	CHMP1B	chromatin modifying protein 1B	protein binding /// cytoplasm /// endosome /// cytosol /// cell cycle /// protein transport /// membrane /// protein domain specific binding /// late endosome membrane /// cell division
8167815	0.620992	1.53793	8.66827	5.20841	4.61815e-05	0.00191019	1.93131	MAGED2	melanoma antigen family D, 2	---
7917482	0.619595	1.53644	10.3842	4.81805	0.000111767	0.0037215	1.05527	CCBL2 /// RBMXL1	cysteine conjugate-beta lyase 2 /// RNA binding motif protein, X-linked-like 1	cellular amino acid metabolic process /// biosynthetic process /// kynurenine-oxoglutarate transaminase activity /// lyase activity /// pyridoxal phosphate binding /// kynurenine-glyoxylate transaminase activity /// cysteine-S-conjugate beta-lyase activity /// kynurenine metabolic process /// kynurenine-oxoglutarate transaminase activity
8072659	0.617179	1.53387	9.05105	4.72906	0.000136947	0.00431992	0.854251	TOM1	target of myb1 (chicken)	protein binding /// intracellular /// cytoplasm /// early endosome /// centrosome /// cytosol /// intracellular protein transport /// endocytosis /// protein transport /// membrane /// endosome transport /// endosome transport /// cytoplasm
8178676	0.616944	1.53362	10.6046	6.06869	6.95555e-06	0.000444528	3.81291	NEU1	sialidase 1 (lysosomal sialidase)	exo-alpha-sialidase activity /// protein binding /// lysosome /// lysosomal membrane /// plasma membrane /// metabolic process /// cytoplasmic membrane-bounded vesicle /// hydrolase activity, acting on glycosyl bonds /// lysosomal lumen /// exo-alpha-sialidase activity /// cytoplasmic vesicle
8007188	0.616868	1.53354	10.8484	4.41292	0.000282945	0.00753324	0.137776	CNP	2',3'-cyclic nucleotide 3' phosphodiesterase	microtubule cytoskeleton organization /// 2',3'-cyclic-nucleotide 3'-phosphodiesterase activity /// extracellular space /// intracellular /// membrane fraction /// cytoplasm /// synaptic transmission /// axonogenesis /// adult locomotory behavior /// cyclic nucleotide catabolic process /// membrane /// RNA metabolic process /// hydrolase activity /// intrinsic to membrane /// melanosome /// 2',3'…
8101158	0.614654	1.53119	10.7224	7.77064	2.1665e-07	2.95648e-05	7.25955	SCARB2	scavenger receptor class B, member 2	receptor activity /// protein binding /// membrane fraction /// lysosomal membrane /// integral to plasma membrane /// cell adhesion /// membrane /// lysosome
8156549	0.612506	1.52891	7.53654	6.30842	4.16922e-06	0.000302445	4.32208	C9orf3	chromosome 9 open reading frame 3	aminopeptidase activity /// binding /// cytoplasm /// proteolysis /// peptidase activity /// metallopeptidase activity /// zinc ion binding /// leukotriene biosynthetic process /// metal ion binding
8076690	0.611328	1.52767	9.90008	7.30419	5.39382e-07	5.79348e-05	6.35495	C22orf9	chromosome 22 open reading frame 9	protein binding
8008566	0.610312	1.52659	8.37174	4.91951	8.87185e-05	0.00314262	1.28394	STXBP4	syntaxin binding protein 4	protein binding /// cytoplasm /// protein targeting /// insulin receptor signaling pathway /// glucose transport
8084541	0.60944	1.52567	9.15446	5.72942	1.45273e-05	0.000770246	3.08037	VPS8	vacuolar protein sorting 8 homolog (S. cerevisiae)	protein binding /// zinc ion binding /// metal ion binding
8132305	0.607258	1.52336	7.5392	8.11869	1.11794e-07	1.7154e-05	7.91442	EEPD1	endonuclease/exonuclease/phosphatase family domain containing 1	DNA binding /// DNA repair /// protein secretion /// integral to membrane /// intracellular
8068353	0.607161	1.52326	10.9421	6.17245	5.56848e-06	0.000374573	4.03418	MRPS6 /// SLC5A3	mitochondrial ribosomal protein S6 /// solute carrier family 5 (sodium/myo-inositol cotransporter), member 3	transporter activity /// myo-inositol:sodium symporter activity /// plasma membrane /// integral to plasma membrane /// inositol metabolic process /// transport /// ion transport /// sodium ion transport /// peripheral nervous system development /// symporter activity /// myo-inositol transport /// integral to membrane /// regulation of respiratory gaseous exchange /// transmembrane transport ///…
8096130	0.604408	1.52036	7.44864	4.74794	0.000131162	0.00420338	0.896937	CDS1	CDP-diacylglycerol synthase (phosphatidate cytidylyltransferase) 1	diacylglycerol cholinephosphotransferase activity /// phosphatidate cytidylyltransferase activity /// endoplasmic reticulum /// endoplasmic reticulum membrane /// lipid metabolic process /// signal transduction /// visual perception /// phospholipid biosynthetic process /// membrane /// integral to membrane /// nucleotidyltransferase activity /// magnesium ion binding
7960544	0.601491	1.51728	8.76883	5.16185	5.12794e-05	0.00207215	1.82741	VAMP1 /// TAPBPL	vesicle-associated membrane protein 1 (synaptobrevin 1) /// TAP binding protein-like	protein binding /// mitochondrion /// mitochondrial outer membrane /// integral to plasma membrane /// membrane /// vesicle-mediated transport /// synaptosome /// cell junction /// cytoplasmic vesicle membrane /// synaptic vesicle membrane /// cytoplasmic vesicle /// synapse /// endoplasmic reticulum /// endoplasmic reticulum membrane /// microsome /// plasma membrane /// integral to membrane ///…
7905329	0.601315	1.5171	11.9343	4.64078	0.000167612	0.00507824	0.654505	MLLT11	myeloid/lymphoid or mixed-lineage leukemia (trithorax homolog, Drosophila); translocated to, 11	molecular_function /// cellular_component
7983228	0.599419	1.51511	6.85467	6.76836	1.5947e-06	0.0001365	5.27794	MAP1A	microtubule-associated protein 1A	structural molecule activity /// protein binding /// microtubule /// microtubule associated complex
8121734	0.599122	1.51479	10.3249	4.5477	0.000207521	0.00595675	0.443566	ASF1A	ASF1 anti-silencing function 1 homolog A (S. cerevisiae)	chromatin binding /// nucleus /// nucleus /// DNA repair /// chromatin assembly or disassembly /// nucleosome assembly /// loss of chromatin silencing /// chromatin modification /// chromatin remodeling complex /// histone binding /// regulation of transcription
8094476	0.598072	1.51369	8.47817	4.55089	0.000206004	0.0059388	0.450809	TBC1D19	TBC1 domain family, member 19	GTPase activator activity /// Rab GTPase activator activity /// intracellular /// regulation of Rab GTPase activity
8117861	0.597813	1.51342	7.52824	5.7149	1.4997e-05	0.000790116	3.04873	HLA-L /// HLA-L	major histocompatibility complex, class I, L (pseudogene) /// major histocompatibility complex, class I, L, pseudogene	---
8179080	0.597813	1.51342	7.52824	5.7149	1.4997e-05	0.000790116	3.04873	HLA-L /// HLA-L	major histocompatibility complex, class I, L (pseudogene) /// major histocompatibility complex, class I, L, pseudogene	---
7975284	0.597141	1.51272	6.861	6.23171	4.90724e-06	0.000341833	4.15994	RDH12	retinol dehydrogenase 12 (all-trans/9-cis/11-cis)	retinol dehydrogenase activity /// binding /// intracellular /// visual perception /// oxidoreductase activity /// retinol metabolic process /// photoreceptor cell maintenance /// response to stimulus /// oxidation reduction
8094739	0.595339	1.51083	5.67674	5.92283	9.53023e-06	0.000555741	3.49963	---	---	---
8067680	0.593586	1.50899	8.67296	4.46248	0.000252439	0.00688973	0.250243	PRIC285	peroxisomal proliferator-activated receptor A interacting complex 285	nucleotide binding /// DNA binding /// transcription coactivator activity /// RNA binding /// helicase activity /// ribonuclease activity /// ATP binding /// intracellular /// nucleus /// zinc ion binding /// hydrolase activity /// regulation of transcription /// metal ion binding
8161945	0.592441	1.5078	5.96628	4.85144	0.000103577	0.0035336	1.1306	RASEF	RAS and EF-hand domain containing	nucleotide binding /// calcium ion binding /// GTP binding /// cytoplasm /// small GTPase mediated signal transduction /// protein transport /// perinuclear region of cytoplasm
7975971	0.591935	1.50727	7.26179	4.72887	0.000137004	0.00431992	0.853836	C14orf174	chromosome 14 open reading frame 174	---
7978331	0.591873	1.5072	7.64765	5.14283	5.35245e-05	0.00213694	1.7849	CBLN3	cerebellin 3 precursor	protein binding /// extracellular region /// cell junction /// synapse
8120860	0.591109	1.5064	8.69875	4.89047	9.47725e-05	0.0033078	1.21856	BCKDHB	branched chain keto acid dehydrogenase E1, beta polypeptide	alpha-ketoacid dehydrogenase activity /// 3-methyl-2-oxobutanoate dehydrogenase (2-methylpropanoyl-transferring) activity /// protein binding /// mitochondrion /// mitochondrial matrix /// mitochondrial alpha-ketoglutarate dehydrogenase complex /// response to nutrient /// branched chain family amino acid catabolic process /// carboxy-lyase activity /// protein complex binding /// response to glu…
8112107	0.590323	1.50558	7.70084	5.09647	5.94223e-05	0.00229801	1.68121	SKIV2L2 /// PPAP2A	superkiller viralicidic activity 2-like 2 (S. cerevisiae) /// phosphatidic acid phosphatase type 2A	membrane fraction /// plasma membrane /// integral to plasma membrane /// lipid metabolic process /// activation of protein kinase C activity by G-protein coupled receptor protein signaling pathway /// phosphatidate phosphatase activity /// phosphatidate phosphatase activity /// phosphatidate phosphatase activity /// negative regulation of cell proliferation /// germ cell migration /// hydrolase …
8020451	0.59029	1.50555	5.7391	4.96366	8.02566e-05	0.00291101	1.38325	---	---	---
7913682	0.58784	1.503	7.61417	5.11883	5.64995e-05	0.00222424	1.73124	HMGCL /// HMGCL	3-hydroxymethyl-3-methylglutaryl-Coenzyme A lyase /// 3-hydroxymethyl-3-methylglutaryl-CoA lyase	acyl-CoA binding /// hydroxymethylglutaryl-CoA lyase activity /// mitochondrion /// mitochondrial inner membrane /// mitochondrial matrix /// acyl-CoA metabolic process /// metabolic process /// lyase activity /// carboxylic acid binding /// metal ion binding /// ketone body biosynthetic process /// hydroxymethylglutaryl-CoA lyase activity /// mitochondrial matrix /// metal ion binding
7923453	0.587325	1.50246	9.82627	4.33192	0.000341027	0.00867468	-0.0461396	KDM5B	lysine (K)-specific demethylase 5B	DNA binding /// transcription factor activity /// protein binding /// intracellular /// nucleus /// zinc ion binding /// oxidoreductase activity /// transcription repressor activity /// chromatin modification /// oxidoreductase activity, acting on single donors with incorporation of molecular oxygen, incorporation of two atoms of oxygen /// regulation of transcription /// negative regulation of t…
8028950	0.587244	1.50237	4.63798	5.48723	2.47797e-05	0.00117367	2.54956	CYP2G1P	cytochrome P450, family 2, subfamily G, polypeptide 1 pseudogene	monooxygenase activity /// electron carrier activity /// heme binding /// metal ion binding
7996516	0.587005	1.50213	6.96337	4.41269	0.000283094	0.00753324	0.137255	PLEKHG4	pleckstrin homology domain containing, family G (with RhoGef domain) member 4	guanyl-nucleotide exchange factor activity /// Rho guanyl-nucleotide exchange factor activity /// intracellular /// cell death /// regulation of Rho protein signal transduction
7978208	0.586063	1.50114	9.98266	4.27502	0.00038886	0.00962667	-0.175313	TINF2	TERF1 (TRF1)-interacting nuclear factor 2	chromosome, telomeric region /// nuclear telomere cap complex /// DNA binding /// protein binding /// nucleus /// nucleoplasm /// chromosome /// protein C-terminus binding /// perinucleolar chromocenter /// telomere maintenance via telomere lengthening /// negative regulation of protein amino acid ADP-ribosylation /// telomere assembly /// positive regulation of telomere maintenance /// negative …
8093916	0.585287	1.50034	8.88247	5.15688	5.18565e-05	0.0020904	1.81631	MAN2B2	mannosidase, alpha, class 2B, member 2	alpha-mannosidase activity /// protein binding /// extracellular region /// carbohydrate metabolic process /// mannose metabolic process /// metabolic process /// zinc ion binding /// carbohydrate binding /// metal ion binding
7995267	0.584884	1.49992	7.1724	4.82004	0.000111261	0.00371937	1.05976	TP53TG3 /// TP53TG3B	TP53 target 3 /// TP53 target 3B	nucleus /// cytoplasm
8023466	0.584511	1.49953	9.47533	5.19284	4.78267e-05	0.00196846	1.89657	FECH /// FECH	ferrochelatase (protoporphyria) /// ferrochelatase	ferrochelatase activity /// ferrochelatase activity /// protein binding /// mitochondrion /// mitochondrial inner membrane /// mitochondrial matrix /// generation of precursor metabolites and energy /// heme biosynthetic process /// ferrous iron binding /// response to light stimulus /// membrane /// protoporphyrinogen IX metabolic process /// metal ion binding /// 2 iron, 2 sulfur cluster bindin…
8148917	0.583442	1.49842	9.56921	4.56687	0.000198584	0.00576483	0.487023	MFSD3	major facilitator superfamily domain containing 3	membrane /// integral to membrane /// transmembrane transport /// transport
8168205	0.579395	1.49422	7.44671	4.34813	0.000328507	0.00844005	-0.00931388	FOXO4	forkhead box O4	G1 phase of mitotic cell cycle /// DNA binding /// transcription factor activity /// protein binding /// nucleus /// cytoplasm /// cytosol /// regulation of transcription, DNA-dependent /// transcription from RNA polymerase II promoter /// cell cycle /// cell cycle arrest /// multicellular organismal development /// muscle organ development /// transcription factor binding /// negative regulation…
7986428	0.578613	1.49341	8.41064	4.28897	0.000376543	0.00935768	-0.143648	LOC100288426 /// LOC400464	hypothetical protein LOC100288426 /// similar to FLJ43276 protein	---
7904830	0.575274	1.48996	10.8406	5.86937	1.07031e-05	0.000603199	3.38418	RNF115	ring finger protein 115	protein binding /// zinc ion binding /// metal ion binding
8016336	0.573338	1.48796	8.18784	5.17717	4.9542e-05	0.00201772	1.86161	OSBPL7	oxysterol binding protein-like 7	lipid transport /// steroid metabolic process
8026047	0.572195	1.48678	9.491	4.2901	0.000375562	0.00935311	-0.141082	JUNB	jun B proto-oncogene	chromatin /// vasculogenesis /// trophectodermal cell differentiation /// embryonic placenta development /// DNA binding /// double-stranded DNA binding /// transcription factor activity /// RNA polymerase II transcription factor activity /// transcription coactivator activity /// transcription corepressor activity /// nucleus /// nucleolus /// regulation of transcription from RNA polymerase II p…
8029399	0.571306	1.48587	8.08688	5.4349	2.78337e-05	0.00129983	2.43408	ZNF226	zinc finger protein 226	DNA binding /// intracellular /// nucleus /// regulation of transcription, DNA-dependent /// zinc ion binding /// metal ion binding
8135532	0.569107	1.4836	6.32318	4.35636	0.000322337	0.0083136	0.00935879	C7orf53	chromosome 7 open reading frame 53	membrane /// integral to membrane
8143702	0.56733	1.48178	6.67562	6.35191	3.80256e-06	0.00028074	4.41366	ZNF425	zinc finger protein 425	DNA binding /// intracellular /// nucleus /// regulation of transcription, DNA-dependent /// zinc ion binding /// metal ion binding
8108620	0.567237	1.48168	9.39874	4.31995	0.000350565	0.0088322	-0.0732958	ZMAT2	zinc finger, matrin type 2	DNA binding /// intracellular /// nucleus /// zinc ion binding /// metal ion binding
8133540	0.566438	1.48086	8.38293	5.31226	3.65899e-05	0.00160456	2.16242	GATSL2 /// GATS /// GATSL1	GATS protein-like 2 /// GATS, stromal antigen 3 opposite strand /// GATS protein-like 1	---
8140249	0.566438	1.48086	8.38293	5.31226	3.65899e-05	0.00160456	2.16242	GATSL2 /// GATS /// GATSL1	GATS protein-like 2 /// GATS, stromal antigen 3 opposite strand /// GATS protein-like 1	---
8004671	0.56443	1.4788	8.29471	4.30344	0.000364178	0.00908998	-0.110792	KDM6B	lysine (K)-specific demethylase 6B	negative regulation of transcription from RNA polymerase II promoter /// binding /// nucleus /// inflammatory response /// oxidoreductase activity /// chromatin modification /// histone demethylation /// oxidoreductase activity, acting on single donors with incorporation of molecular oxygen, incorporation of two atoms of oxygen /// sequence-specific DNA binding /// metal ion binding /// oxidation…
7977456	0.562405	1.47673	9.30209	4.7306	0.000136465	0.00431928	0.857736	POTEH /// POTEG /// P704P /// POTEF /// POTEE	POTE ankyrin domain family, member H /// POTE ankyrin domain family, member G /// prostate-specific P704P /// POTE ankyrin domain family, member F /// POTE ankyrin domain family, member E	protein binding /// ATP binding /// cytoplasm /// cell cortex
7925589	0.561326	1.47562	8.60023	4.80507	0.000115123	0.00380661	1.02599	SMYD3	SET and MYND domain containing 3	protein binding /// nucleus /// cytoplasm /// methyltransferase activity /// zinc ion binding /// chromatin modification /// transferase activity /// histone-lysine N-methyltransferase activity /// metal ion binding
7939411	0.561201	1.4755	6.66788	4.57978	0.000192783	0.00564908	0.516298	C11orf74	chromosome 11 open reading frame 74	---
7915425	0.559322	1.47358	6.16433	4.5683	0.000197933	0.00575595	0.490269	ZMYND12	zinc finger, MYND-type containing 12	binding /// intracellular /// zinc ion binding /// metal ion binding
8075897	0.558048	1.47228	8.3584	4.34838	0.000328319	0.00844005	-0.00875028	C1QTNF6	C1q and tumor necrosis factor related protein 6	extracellular region
8004043	0.558041	1.47227	7.28687	6.03588	7.46443e-06	0.000469836	3.74266	ENO3	enolase 3 (beta, muscle)	phosphopyruvate hydratase complex /// magnesium ion binding /// phosphopyruvate hydratase activity /// membrane fraction /// cytoplasm /// glycolysis /// aging /// lyase activity /// response to drug /// protein homodimerization activity /// skeletal muscle tissue regeneration /// protein heterodimerization activity /// phosphopyruvate hydratase activity /// cytoplasm
7942232	0.55784	1.47206	8.80166	4.93584	8.54871e-05	0.00305571	1.3207	NADSYN1	NAD synthetase 1	nucleotide binding /// NAD+ synthase (glutamine-hydrolyzing) activity /// protein binding /// ATP binding /// cytosol /// nitrogen compound metabolic process /// NAD biosynthetic process /// hydrolase activity, acting on carbon-nitrogen (but not peptide) bonds /// ligase activity /// NAD metabolic process /// NAD+ synthase (glutamine-hydrolyzing) activity
7919197	0.557421	1.47164	7.29774	5.09719	5.93266e-05	0.00229698	1.68281	POLR3GL	polymerase (RNA) III (DNA directed) polypeptide G (32kD)-like	---
8023995	0.557216	1.47143	8.98422	5.9831	8.36465e-06	0.000505477	3.62939	FSTL3	follistatin-like 3 (secreted glycoprotein)	ossification /// hemopoietic progenitor cell differentiation /// protein binding /// extracellular region /// extracellular space /// nucleus /// regulation of gene-specific transcription from RNA polymerase II promoter /// secretory granule /// negative regulation of BMP signaling pathway /// negative regulation of activin receptor signaling pathway /// regulation of transcription /// negative r…
8002303	0.556787	1.47099	12.481	5.09491	5.96316e-05	0.00230311	1.67773	NQO1	NAD(P)H dehydrogenase, quinone 1	NAD(P)H dehydrogenase (quinone) activity /// cytochrome-b5 reductase activity /// cytoplasm /// xenobiotic metabolic process /// nitric oxide biosynthetic process /// response to oxidative stress /// synaptic transmission, cholinergic /// electron carrier activity /// response to toxin /// oxidoreductase activity /// negative regulation of catalytic activity /// positive regulation of neuron apop…
8156861	0.555248	1.46942	9.50799	5.11886	5.64951e-05	0.00222424	1.73132	STX17	syntaxin 17	SNAP receptor activity /// nucleolus /// endoplasmic reticulum /// intracellular protein transport /// membrane /// integral to membrane /// vesicle-mediated transport
8177938	0.554482	1.46864	7.37088	4.84117	0.00010603	0.00359463	1.10743	PSORS1C1	psoriasis susceptibility 1 candidate 1	---
8042066	0.554452	1.46861	7.77479	5.40873	2.95028e-05	0.0013606	2.37623	CCDC104	coiled-coil domain containing 104	nucleus /// nucleolus
8162586	0.551881	1.466	9.44871	5.68806	1.59068e-05	0.000826285	2.99017	SLC35D2	solute carrier family 35, member D2	Golgi membrane /// nucleotide-sugar transmembrane transporter activity /// cellular_component /// Golgi apparatus /// biological_process /// carbohydrate transport /// membrane /// integral to membrane
7957551	0.550154	1.46424	8.12214	5.16887	5.04759e-05	0.00204963	1.84308	SOCS2	suppressor of cytokine signaling 2	regulation of cell growth /// SH3/SH2 adaptor activity /// growth hormone receptor binding /// prolactin receptor binding /// insulin-like growth factor receptor binding /// protein binding /// cytoplasm /// anti-apoptosis /// JAK-STAT cascade /// aging /// JAK pathway signal transduction adaptor activity /// regulation of signal transduction /// negative regulation of signal transduction /// res…
7961371	0.548838	1.46291	8.42959	5.45138	2.68328e-05	0.00126372	2.47047	DUSP16	dual specificity phosphatase 16	inactivation of MAPK activity /// phosphoprotein phosphatase activity /// protein tyrosine phosphatase activity /// protein binding /// nucleus /// cytoplasm /// protein amino acid dephosphorylation /// cytoplasmic membrane-bounded vesicle /// dephosphorylation /// hydrolase activity /// MAP kinase tyrosine/serine/threonine phosphatase activity /// MAPK export from nucleus /// MAPK phosphatase ex…
7920575	0.547083	1.46113	7.55191	5.34077	3.43309e-05	0.00152416	2.2257	PBXIP1	pre-B-cell leukemia homeobox interacting protein 1	transcription corepressor activity /// protein binding /// nucleus /// cytoplasm /// cytosol /// cytoskeleton /// microtubule /// multicellular organismal development /// negative regulation of transcription /// cell differentiation /// cytoplasm
7990839	0.545705	1.45973	7.34887	5.58011	2.01753e-05	0.00099082	2.75386	IL16 /// STARD5	interleukin 16 (lymphocyte chemoattractant factor) /// StAR-related lipid transfer (START) domain containing 5	cytokine activity /// protein binding /// extracellular region /// extracellular space /// intracellular /// nucleus /// cytoplasm /// chemotaxis /// immune response /// leukocyte chemotaxis /// interspecies interaction between organisms /// regulation of transcription /// induction of positive chemotaxis /// cytosol /// steroid biosynthetic process /// lipid transport /// lipid binding /// extra…
7928208	0.54352	1.45752	7.90931	6.81056	1.46215e-06	0.000128203	5.36421	SLC29A3	solute carrier family 29 (nucleoside transporters), member 3	nucleoside transmembrane transporter activity /// lysosomal membrane /// endosome /// transport /// nucleoside transport /// membrane /// integral to membrane /// late endosome membrane
8110569	0.542552	1.45655	12.8123	6.70539	1.81592e-06	0.000152304	5.14878	SQSTM1	sequestosome 1	protein kinase C binding /// protein binding /// nucleus /// nucleoplasm /// cytoplasm /// late endosome /// cytosol /// cytosol /// cytosol /// ubiquitin-dependent protein catabolic process /// apoptosis /// anti-apoptosis /// response to stress /// immune response /// protein localization /// zinc ion binding /// induction of apoptosis by extracellular signals /// endosome transport /// chapero…
7923731	0.541217	1.4552	7.78122	5.19057	4.80713e-05	0.00197365	1.89151	DSTYK	dual serine/threonine and tyrosine protein kinase	nucleotide binding /// protein serine/threonine kinase activity /// protein tyrosine kinase activity /// protein binding /// ATP binding /// cytoplasm /// protein amino acid phosphorylation /// transferase activity
8028248	0.539892	1.45386	6.44655	4.91552	8.95273e-05	0.00316118	1.27496	ZNF570	zinc finger protein 570	DNA binding /// intracellular /// nucleus /// regulation of transcription, DNA-dependent /// zinc ion binding /// metal ion binding
7904812	0.538994	1.45296	10.4268	6.36097	3.73046e-06	0.000276029	4.4327	PIAS3	protein inhibitor of activated STAT, 3	nucleic acid binding /// protein binding /// nucleus /// protein C-terminus binding /// zinc ion binding /// response to hormone stimulus /// potassium channel regulator activity /// nuclear speck /// SUMO ligase activity /// enzyme binding /// dendrite /// positive regulation of protein sumoylation /// synapse /// regulation of transcription /// metal ion binding /// protein N-terminus binding /…
8141477	0.538151	1.45211	7.64478	4.50363	0.000229638	0.00637718	0.343624	GATS	GATS, stromal antigen 3 opposite strand	---
8002029	0.536854	1.4508	7.8744	5.34904	3.37027e-05	0.00149826	2.24404	ZDHHC1	zinc finger, DHHC-type containing 1	DNA binding /// cellular_component /// biological_process /// zinc ion binding /// membrane /// integral to membrane /// palmitoyltransferase activity /// transferase activity /// protein palmitoylation /// metal ion binding /// protein binding
7945663	0.536525	1.45047	6.95195	4.99491	7.47659e-05	0.00275081	1.45348	CTSD /// LOC402778	cathepsin D /// CD225 family protein FLJ76511	response to biotic stimulus /// membrane /// integral to membrane /// autophagic vacuole formation /// aspartic-type endopeptidase activity /// extracellular region /// mitochondrion /// lysosome /// proteolysis /// peptidase activity /// melanosome
8030171	0.53637	1.45032	12.9967	5.50014	2.40803e-05	0.00114764	2.57801	FTL	ferritin, light polypeptide	iron ion binding /// protein binding /// cytosol /// iron ion transport /// cellular iron ion homeostasis /// post-Golgi vesicle-mediated transport /// intracellular ferritin complex /// ferric iron binding /// cellular membrane organization /// oxidoreductase activity /// cytosolic small ribosomal subunit /// identical protein binding /// oxidation reduction /// cellular iron ion homeostasis
8153609	0.535763	1.44971	8.54241	4.81733	0.000111949	0.00372384	1.05366	PARP10	poly (ADP-ribose) polymerase family, member 10	NAD+ ADP-ribosyltransferase activity /// nucleus /// nucleolus /// cytoplasm /// transferase activity, transferring glycosyl groups
7918008	0.533103	1.44704	9.42884	5.28771	3.86567e-05	0.00168255	2.10786	DBT	dihydrolipoamide branched chain transacylase E2	protein binding /// mitochondrion /// mitochondrial alpha-ketoglutarate dehydrogenase complex /// metabolic process /// acyltransferase activity /// transferase activity /// lipoic acid binding /// mitochondrial nucleoid /// dihydrolipoyllysine-residue (2-methylpropanoyl)transferase activity /// fatty-acyl-CoA biosynthetic process /// cofactor binding /// mitochondrion /// acyl-CoA biosynthetic p…
8158317	0.532741	1.44668	10.6192	5.39168	3.06451e-05	0.00140743	2.3385	SPTAN1	spectrin, alpha, non-erythrocytic 1 (alpha-fodrin)	actin binding /// structural constituent of cytoskeleton /// calcium ion binding /// protein binding /// calmodulin binding /// membrane fraction /// cytoplasm /// cytosol /// cytoskeleton /// cell cortex /// spectrin /// actin filament capping /// actin binding /// cytoskeleton
7982350	0.530347	1.44428	7.29611	4.69197	0.000149072	0.00462312	0.770367	LOC728498 /// LOC653073 /// LOC643699 /// GOLGA9P	Golgin subfamily A member 8-like protein 1 /// Golgin subfamily A member 8-like protein 3 /// similar to golgi autoantigen, golgin subfamily a, 8E /// golgin A9 (pseudogene)	Golgi apparatus /// membrane /// Golgi cisterna membrane
7987139	0.530347	1.44428	7.29611	4.69197	0.000149072	0.00462312	0.770367	LOC728498 /// LOC653073 /// LOC643699 /// GOLGA9P	Golgin subfamily A member 8-like protein 1 /// Golgin subfamily A member 8-like protein 3 /// similar to golgi autoantigen, golgin subfamily a, 8E /// golgin A9 (pseudogene)	Golgi apparatus /// membrane /// Golgi cisterna membrane
7913609	0.530198	1.44413	7.22303	5.93635	9.25508e-06	0.000544907	3.52877	ASAP3	ArfGAP with SH3 domain, ankyrin repeat and PH domain 3	cytoplasm /// ARF GTPase activator activity /// zinc ion binding /// regulation of ARF GTPase activity /// metal ion binding
7933821	0.525829	1.43976	7.26656	4.85352	0.000103089	0.0035267	1.13528	RHOBTB1	Rho-related BTB domain containing 1	nucleotide binding /// protein binding /// GTP binding /// intracellular /// small GTPase mediated signal transduction
8117343	0.519759	1.43372	6.90927	5.03824	6.77801e-05	0.00254726	1.55072	HFE	hemochromatosis	antigen processing and presentation of peptide antigen via MHC class I /// protein binding /// cytoplasm /// early endosome /// plasma membrane /// integral to plasma membrane /// protein complex assembly /// ion transport /// iron ion transport /// cellular iron ion homeostasis /// receptor-mediated endocytosis /// immune response /// female pregnancy /// cellular response to iron ion starvation…
8117447	0.518854	1.43282	7.9163	4.7835	0.00012093	0.00397102	0.977288	BTN2A2	butyrophilin, subfamily 2, member A2	membrane /// integral to membrane
7900833	0.518315	1.43228	9.81105	5.2437	4.26636e-05	0.00179819	2.00995	KDM4A	lysine (K)-specific demethylase 4A	nucleic acid binding /// protein binding /// nucleus /// nucleolus /// cytoplasm /// zinc ion binding /// oxidoreductase activity /// transcription repressor activity /// chromatin modification /// histone demethylation /// oxidoreductase activity, acting on single donors with incorporation of molecular oxygen, incorporation of two atoms of oxygen /// interspecies interaction between organisms //…
8072039	0.51754	1.43151	7.7439	5.31546	3.6329e-05	0.00160006	2.16952	MYO18B	myosin XVIIIB	nucleotide binding /// motor activity /// actin binding /// protein binding /// ATP binding /// nucleus /// cytoplasm /// unconventional myosin complex /// sarcomere /// nucleus /// cytoplasm
8059222	0.517481	1.43145	9.78327	5.80863	1.22173e-05	0.000670178	3.25258	DNPEP	aspartyl aminopeptidase	aminopeptidase activity /// protein binding /// cytoplasm /// vacuole /// proteolysis /// peptide metabolic process /// peptidase activity /// metallopeptidase activity /// zinc ion binding /// metal ion binding /// aminopeptidase activity /// cytoplasm
8017173	0.516907	1.43088	7.91447	4.83745	0.000106931	0.00361838	1.09905	LOC100134348 /// TBC1D3P2 /// TBC1D3F /// TBC1D3C /// TBC1D3G /// TBC1D3B /// TBC1D3 /// DHX40P1 /// TBC1D3H	similar to TBC1 domain family member 3 (Rab GTPase-activating protein PRC17) (Prostate cancer gene 17 protein) (TRE17 alpha protein) /// TBC1 domain family, member 3 pseudogene 2 /// TBC1 domain family, member 3F /// TBC1 domain family, member 3C /// TBC1 domain family, member 3G /// TBC1 domain family, member 3B /// TBC1 domain family, member 3 /// DEAH (Asp-Glu-Ala-His) box polypeptide 40 pseud…	GTPase activator activity /// Rab GTPase activator activity /// intracellular /// regulation of Rab GTPase activity
8068254	0.516638	1.43062	10.4912	5.01566	7.1333e-05	0.00264561	1.50007	IL10RB	interleukin 10 receptor, beta	receptor activity /// interleukin-10 receptor activity /// protein binding /// plasma membrane /// inflammatory response /// immune response /// signal transduction /// blood coagulation /// integral to membrane /// interleukin-28 receptor complex /// receptor activity /// integral to membrane
8169028	0.515668	1.42966	9.56443	5.93597	9.26262e-06	0.000544907	3.52796	NGFRAP1	nerve growth factor receptor (TNFRSF16) associated protein 1	death receptor binding /// protein binding /// nucleus /// cytoplasm /// cytosol /// apoptosis /// multicellular organismal development /// induction of apoptosis by extracellular signals /// induction of apoptosis via death domain receptors /// caspase regulator activity /// metal ion binding /// cytoplasm /// apoptosis
8045336	0.515421	1.42941	9.51182	5.2052	4.65159e-05	0.00191926	1.92415	GPR39 /// LYPD1	G protein-coupled receptor 39 /// LY6/PLAUR domain containing 1	receptor activity /// G-protein coupled receptor activity /// plasma membrane /// integral to plasma membrane /// signal transduction /// G-protein coupled receptor protein signaling pathway /// metal ion binding /// anchored to membrane /// G-protein coupled receptor activity /// G-protein coupled receptor protein signaling pathway /// zinc ion binding
8145977	0.513279	1.42729	11.2401	6.12943	6.10544e-06	0.000404161	3.94259	PLEKHA2	pleckstrin homology domain containing, family A (phosphoinositide binding specific) member 2	positive regulation of cell-matrix adhesion /// fibronectin binding /// protein binding /// phosphatidylinositol binding /// nucleus /// cytoplasm /// plasma membrane /// lipid binding /// membrane /// protein complex /// laminin binding /// phospholipid binding /// cellular_component /// cytoplasm /// biological_process
8074980	0.512374	1.4264	8.82493	4.69632	0.000147596	0.0045973	0.780202	GSTT1	glutathione S-transferase theta 1	glutathione transferase activity /// cytoplasm /// transferase activity /// glutathione transferase activity
7916616	0.510255	1.4243	7.22554	5.66057	1.68973e-05	0.000866917	2.93011	CYP2J2	cytochrome P450, family 2, subfamily J, polypeptide 2	endoplasmic reticulum /// endoplasmic reticulum membrane /// microsome /// icosanoid metabolic process /// xenobiotic metabolic process /// regulation of heart contraction /// arachidonic acid epoxygenase activity /// arachidonic acid 14,15-epoxygenase activity /// arachidonic acid 11,12-epoxygenase activity /// electron carrier activity /// membrane /// epoxygenase P450 pathway /// heme binding …
8030539	0.509789	1.42384	8.92465	4.3427	0.000332647	0.00850048	-0.0216436	TBC1D17	TBC1 domain family, member 17	GTPase activator activity /// Rab GTPase activator activity /// intracellular /// regulation of Rab GTPase activity
8119926	0.507975	1.42205	9.555	4.32035	0.000350242	0.0088322	-0.0723892	TMEM63B	transmembrane protein 63B	membrane /// integral to membrane
8154916	0.50473	1.41886	8.44085	4.73879	0.000133932	0.00426342	0.876266	GALT	galactose-1-phosphate uridylyltransferase	soluble fraction /// cytosol /// carbohydrate metabolic process /// galactose metabolic process /// UDP-glucose:hexose-1-phosphate uridylyltransferase activity /// zinc ion binding /// transferase activity /// nucleotidyltransferase activity /// UDP-glucose conversion /// metal ion binding /// iron ion binding /// galactose metabolic process /// UDP-glucose:hexose-1-phosphate uridylyltransferase …
8097801	0.504132	1.41827	8.75454	4.62926	0.000172098	0.00519053	0.628409	FAM160A1	family with sequence similarity 160, member A1	---
8086185	0.504082	1.41822	7.21438	4.45597	0.00025625	0.00697414	0.235469	PLCD1	phospholipase C, delta 1	phosphoinositide phospholipase C activity /// signal transducer activity /// calcium ion binding /// cytoplasm /// phospholipid metabolic process /// lipid catabolic process /// hydrolase activity /// GTPase activating protein binding /// phosphoinositide phospholipase C activity /// intracellular signaling cascade
8122672	0.504028	1.41817	10.6829	5.85022	1.11586e-05	0.000622356	3.34273	MAP3K7IP2 /// TAB2	mitogen-activated protein kinase kinase kinase 7 interacting protein 2 /// TGF-beta activated kinase 1/MAP3K7 binding protein 2	protein binding /// intracellular /// cytoplasm /// cytosol /// zinc ion binding /// membrane /// positive regulation of I-kappaB kinase/NF-kappaB cascade /// metal ion binding /// cytosol /// positive regulation of I-kappaB kinase/NF-kappaB cascade
7930398	0.502745	1.41691	8.31365	5.03043	6.89874e-05	0.00257809	1.53322	MXI1	MAX interactor 1	DNA binding /// transcription corepressor activity /// nucleus /// negative regulation of cell proliferation /// transcription regulator activity /// cytoplasmic sequestering of transcription factor /// regulation of transcription /// DNA binding /// nucleus
7904293	0.502366	1.41654	10.155	4.37723	0.000307196	0.00800511	0.0567481	PTGFRN	prostaglandin F2 receptor negative regulator	protein binding /// endoplasmic reticulum /// endoplasmic reticulum membrane /// Golgi apparatus /// membrane /// integral to membrane
7994576	0.501222	1.41541	8.30107	4.45576	0.00025637	0.00697414	0.235007	RUNDC2A /// RUNDC2B /// RUNDC2C	RUN domain containing 2A /// RUN domain containing 2B /// RUN domain containing 2C	---
8171708	0.50049	1.41469	7.51212	4.34376	0.000331834	0.00849884	-0.019235	CXorf23	chromosome X open reading frame 23	mitochondrion
7994647	0.500016	1.41423	8.16584	4.48016	0.000242376	0.00666973	0.290366	PRRT2	proline-rich transmembrane protein 2	response to biotic stimulus /// membrane /// integral to membrane
8143919	0.498598	1.41284	7.97601	4.59922	0.000184372	0.00544837	0.560354	SMARCD3	SWI/SNF related, matrix associated, actin dependent regulator of chromatin, subfamily d, member 3	heart morphogenesis /// transcription coactivator activity /// receptor binding /// protein binding /// nucleus /// nucleoplasm /// regulation of transcription from RNA polymerase II promoter /// nervous system development /// transcription factor binding /// SWI/SNF complex /// chromatin modification /// transcription regulator activity /// nuclear hormone receptor binding /// muscle cell differ…
7901385	0.496044	1.41034	11.0718	4.54556	0.000208545	0.00596982	0.438709	OSBPL9	oxysterol binding protein-like 9	lipid transport /// steroid metabolic process
8133549	0.495959	1.41026	6.46724	5.14869	5.28216e-05	0.00211849	1.79801	GTF2IRD2 /// GTF2IRD2B	GTF2I repeat domain containing 2 /// GTF2I repeat domain containing 2B	DNA binding /// intracellular /// nucleus /// zinc ion binding /// regulation of transcription
8140170	0.493716	1.40807	6.48487	5.60317	1.91745e-05	0.000954338	2.80443	GTF2IRD2 /// GTF2IRD2B	GTF2I repeat domain containing 2 /// GTF2I repeat domain containing 2B	DNA binding /// intracellular /// nucleus /// zinc ion binding /// regulation of transcription
8161747	0.492855	1.40723	10.935	4.60688	0.000181159	0.00538097	0.577717	ZFAND5	zinc finger, AN1-type domain 5	in utero embryonic development /// vasculature development /// respiratory system process /// molecular_function /// DNA binding /// cellular_component /// biological_process /// zinc ion binding /// fibroblast migration /// metal ion binding /// platelet-derived growth factor receptor signaling pathway /// skeletal system morphogenesis /// smooth muscle tissue development /// face development
8068810	0.492107	1.4065	7.72406	6.03051	7.55122e-06	0.000473656	3.73116	SLC37A1	solute carrier family 37 (glycerol-3-phosphate transporter), member 1	carbohydrate transport /// membrane /// integral to membrane /// transmembrane transport
8023843	0.492036	1.40643	6.23376	4.70981	0.000143109	0.00449539	0.810724	FBXO15	F-box protein 15	protein binding /// SCF ubiquitin ligase complex /// modification-dependent protein catabolic process
7910915	0.491396	1.4058	6.98226	4.69309	0.000148691	0.00462276	0.772893	CHRM3	cholinergic receptor, muscarinic 3	regulation of vascular smooth muscle contraction /// phosphoinositide phospholipase C activity /// receptor activity /// G-protein coupled receptor activity /// muscarinic acetylcholine receptor activity /// plasma membrane /// integral to plasma membrane /// protein modification process /// signal transduction /// G-protein coupled receptor protein signaling pathway /// muscarinic acetylcholine …
8032789	0.490965	1.40538	7.31668	4.62786	0.000172651	0.00520249	0.625241	STAP2	signal transducing adaptor family member 2	protein binding /// cytoplasm
7993825	0.490616	1.40504	8.11894	4.31311	0.000356144	0.0089229	-0.0888374	RUNDC2A /// RUNDC2B /// RUNDC2C	RUN domain containing 2A /// RUN domain containing 2B /// RUN domain containing 2C	---
8071107	0.488696	1.40318	7.22041	4.66806	0.000157459	0.00485005	0.71626	SLC25A18	solute carrier family 25 (mitochondrial carrier), member 18	binding /// mitochondrion /// mitochondrial inner membrane /// symporter activity /// membrane /// integral to membrane /// transmembrane transport /// transport
7941272	0.488012	1.40251	12.9998	4.73074	0.00013642	0.00431928	0.858066	MALAT1	metastasis associated lung adenocarcinoma transcript 1 (non-protein coding)	---
8136849	0.487222	1.40174	10.5834	4.69061	0.000149536	0.00462312	0.767293	GSTK1	glutathione S-transferase kappa 1	glutathione transferase activity /// protein binding /// intracellular /// peroxisome /// protein disulfide oxidoreductase activity /// transferase activity /// outer membrane-bounded periplasmic space /// identical protein binding
7959957	0.486372	1.40092	8.78032	4.68538	0.000151336	0.00467444	0.755461	ULK1	unc-51-like kinase 1 (C. elegans)	nucleotide binding /// pre-autophagosomal structure /// protein serine/threonine kinase activity /// protein binding /// ATP binding /// membrane fraction /// cytoplasm /// autophagic vacuole /// cytosol /// protein amino acid phosphorylation /// signal transduction /// Ras protein signal transduction /// protein localization /// regulation of autophagy /// transferase activity /// cerebellar gra…
8060334	0.485748	1.40031	8.33268	4.60226	0.000183091	0.00542383	0.567241	SOX12	SRY (sex determining region Y)-box 12	DNA binding /// RNA polymerase II transcription factor activity /// nucleus /// regulation of transcription from RNA polymerase II promoter /// regulation of transcription
8028908	0.484719	1.39931	7.86466	4.79382	0.000118118	0.00388634	1.00057	ITPKC	inositol 1,4,5-trisphosphate 3-kinase C	nucleotide binding /// calmodulin binding /// ATP binding /// nucleus /// cytoplasm /// inositol trisphosphate 3-kinase activity /// kinase activity /// transferase activity
8076241	0.484038	1.39865	8.76016	5.00082	7.37715e-05	0.00272023	1.46676	MKL1	megakaryoblastic leukemia (translocation) 1	nucleic acid binding /// transcription coactivator activity /// actin monomer binding /// protein binding /// nucleus /// regulation of transcription /// cytoplasm /// anti-apoptosis /// positive regulation of transcription
7984626	0.483382	1.39802	8.13596	4.51075	0.000225908	0.00631575	0.359781	SENP8	SUMO/sentrin specific peptidase family member 8	protein binding /// proteolysis /// peptidase activity /// cysteine-type peptidase activity /// modification-dependent protein catabolic process
7987145	0.479492	1.39425	8.38938	5.06358	6.40057e-05	0.00244296	1.60753	FMN1	formin 1	actin binding /// nucleus /// cytoplasm /// plasma membrane /// adherens junction /// actin cytoskeleton /// cellular component organization /// actin cytoskeleton organization /// cell junction
7971922	0.477781	1.3926	5.58133	5.21495	4.55084e-05	0.00189536	1.94588	PCDH9	protocadherin 9	calcium ion binding /// protein binding /// plasma membrane /// cell adhesion /// homophilic cell adhesion /// integral to membrane
8093191	0.4737	1.38867	11.5157	4.73963	0.000133675	0.0042634	0.878165	DLG1	discs, large homolog 1 (Drosophila)	endothelial cell proliferation /// guanylate kinase activity /// phosphoprotein phosphatase activity /// protein binding /// endoplasmic reticulum /// endoplasmic reticulum membrane /// cytosol /// plasma membrane /// cell-cell junction /// actin filament organization /// establishment or maintenance of cell polarity /// protein C-terminus binding /// cytoskeletal protein binding /// postsynaptic…
8004699	0.473372	1.38835	9.72556	4.92592	8.74351e-05	0.00310045	1.29838	CHD3	chromodomain helicase DNA binding protein 3	nucleotide binding /// chromatin /// DNA binding /// chromatin binding /// ATP-dependent DNA helicase activity /// helicase activity /// protein binding /// ATP binding /// nucleus /// chromatin assembly or disassembly /// regulation of transcription, DNA-dependent /// regulation of transcription from RNA polymerase II promoter /// zinc ion binding /// chromatin modification /// NuRD complex /// …
8024660	0.470764	1.38584	9.90528	5.75954	1.36001e-05	0.000729215	3.14595	HMG20B	high-mobility group 20B	DNA binding /// transcription factor activity /// protein binding /// nucleus /// chromatin organization /// regulation of transcription, DNA-dependent /// cell cycle /// chromatin modification
7927323	0.470085	1.38519	9.98791	4.94839	8.3087e-05	0.00300059	1.34891	FAM21C /// FAM21B /// FAM21D /// FAM21A	family with sequence similarity 21, member C /// family with sequence similarity 21, member B /// family with sequence similarity 21, member D /// family with sequence similarity 21, member A	early endosome /// transport /// membrane /// early endosome membrane /// retrograde transport, endosome to Golgi /// WASH complex /// protein binding /// early endosome /// retrograde transport, endosome to Golgi /// WASH complex
8148333	0.469147	1.38429	10.9491	5.39074	3.07094e-05	0.00140844	2.33641	EFR3A	EFR3 homolog A (S. cerevisiae)	binding /// plasma membrane
7978558	0.467563	1.38277	9.85393	5.57936	2.02087e-05	0.000991002	2.75221	EAPP	E2F-associated phosphoprotein	nucleus /// cytoplasm /// Golgi apparatus /// nucleus /// cytoplasm
7914530	0.466789	1.38203	8.96553	4.54851	0.000207134	0.00595403	0.445411	BSDC1	BSD domain containing 1	---
7996448	0.464716	1.38005	8.75126	5.28422	3.89597e-05	0.00168911	2.10011	NOL3 /// KIAA0895L	nucleolar protein 3 (apoptosis repressor with CARD domain) /// KIAA0895-like	RNA binding /// protein binding /// intracellular /// nucleus /// nucleolus /// cytoplasm /// cytosol /// mRNA processing /// anti-apoptosis /// RNA splicing /// identical protein binding /// regulation of apoptosis /// nucleolus /// RNA splicing
8166098	0.463332	1.37872	9.24906	4.84079	0.000106121	0.00359463	1.10657	RAB9A	RAB9A, member RAS oncogene family	Golgi membrane /// nucleotide binding /// GTPase activity /// protein binding /// GTP binding /// lysosome /// late endosome /// endoplasmic reticulum /// endoplasmic reticulum membrane /// Golgi apparatus /// plasma membrane /// small GTPase mediated signal transduction /// protein transport /// GDP binding /// GTPase activity /// GTP binding
8017346	0.461603	1.37707	7.88352	5.27791	3.95141e-05	0.00169659	2.08608	LOC100134348 /// TBC1D3P2 /// TBC1D3F /// TBC1D3C /// TBC1D3G /// TBC1D3B /// TBC1D3 /// TBC1D3H	similar to TBC1 domain family member 3 (Rab GTPase-activating protein PRC17) (Prostate cancer gene 17 protein) (TRE17 alpha protein) /// TBC1 domain family, member 3 pseudogene 2 /// TBC1 domain family, member 3F /// TBC1 domain family, member 3C /// TBC1 domain family, member 3G /// TBC1 domain family, member 3B /// TBC1 domain family, member 3 /// TBC1 domain family, member 3H	GTPase activator activity /// Rab GTPase activator activity /// intracellular /// regulation of Rab GTPase activity
7927233	0.458644	1.37425	9.89981	4.94397	8.39244e-05	0.00301124	1.33898	FAM21C /// FAM21B /// FAM21D /// FAM21A	family with sequence similarity 21, member C /// family with sequence similarity 21, member B /// family with sequence similarity 21, member D /// family with sequence similarity 21, member A	early endosome /// transport /// membrane /// early endosome membrane /// retrograde transport, endosome to Golgi /// WASH complex /// protein binding /// early endosome /// retrograde transport, endosome to Golgi /// WASH complex
8036938	0.45809	1.37372	8.08533	4.52414	0.000219062	0.00617098	0.390148	ADCK4	aarF domain containing kinase 4	protein serine/threonine kinase activity /// membrane /// integral to membrane /// kinase activity /// transferase activity
8025000	0.457265	1.37294	7.72245	4.56263	0.000200527	0.00581109	0.477413	VMAC	vimentin-type intermediate filament associated coiled-coil protein	cytoplasm
7967863	0.45618	1.3719	7.72211	4.5629	0.0002004	0.00581109	0.478039	ZNF605 /// ZNF605	zinc finger protein 605 /// zinc finger protein 605	DNA binding /// intracellular /// nucleus /// regulation of transcription, DNA-dependent /// zinc ion binding /// metal ion binding
7976766	0.455681	1.37143	8.3878	4.30608	0.000361965	0.00904832	-0.104794	WDR25	WD repeat domain 25	---
8025382	0.455153	1.37093	7.86731	4.25532	0.000406954	0.00997817	-0.220048	LASS4	LAG1 homolog, ceramide synthase 4	transcription factor activity /// nucleus /// endoplasmic reticulum /// endoplasmic reticulum membrane /// regulation of transcription, DNA-dependent /// lipid biosynthetic process /// membrane /// integral to membrane /// sphingolipid biosynthetic process /// nuclear membrane /// sequence-specific DNA binding /// ceramide biosynthetic process /// sphingosine N-acyltransferase activity
7965846	0.454271	1.37009	9.65344	5.12699	5.54694e-05	0.00220626	1.74949	CCDC53	coiled-coil domain containing 53	protein binding /// biological_process /// WASH complex /// molecular_function /// cellular_component
7919168	0.45375	1.3696	8.93738	5.13849	5.40502e-05	0.00215534	1.7752	PDE4DIP	phosphodiesterase 4D interacting protein	nucleus /// cytoplasm /// Golgi apparatus /// microtubule organizing center /// cytoskeleton /// cytoplasm /// centrosome
7932067	0.451955	1.36789	2.78753	4.45072	0.000259362	0.00703256	0.223564	---	---	---
8079204	0.451233	1.36721	7.51194	4.64321	0.000166682	0.00505927	0.660003	ZNF197	zinc finger protein 197	transcription factor activity /// intracellular /// nucleus /// regulation of transcription, DNA-dependent /// zinc ion binding /// metal ion binding /// transcription factor activity
7988093	0.449858	1.36591	9.54187	4.45928	0.000254302	0.00693489	0.242992	TP53BP1	tumor protein p53 binding protein 1	condensed chromosome kinetochore /// chromosome, telomeric region /// damaged DNA binding /// protein binding /// intracellular /// nucleus /// nucleoplasm /// replication fork /// cytoplasm /// DNA repair /// transcription activator activity /// telomeric DNA binding /// regulation of transcription /// positive regulation of transcription, DNA-dependent /// nucleus /// nucleoplasm /// response t…
8008598	0.449675	1.36573	9.54111	4.95368	8.20951e-05	0.00297122	1.36081	PCTP	phosphatidylcholine transfer protein	cytoplasm /// cytosol /// cytosol /// lipid transport /// cholesterol metabolic process /// lipid binding /// phosphatidylcholine transmembrane transporter activity /// phosphatidylcholine transmembrane transporter activity /// phospholipid transport /// phosphatidylcholine binding
7927560	0.449126	1.36521	10.1647	4.99434	7.48636e-05	0.00275136	1.45219	FAM21C /// FAM21B /// FAM21D /// FAM21A	family with sequence similarity 21, member C /// family with sequence similarity 21, member B /// family with sequence similarity 21, member D /// family with sequence similarity 21, member A	early endosome /// transport /// membrane /// early endosome membrane /// retrograde transport, endosome to Golgi /// WASH complex /// protein binding /// early endosome /// retrograde transport, endosome to Golgi /// WASH complex
8072279	0.447516	1.36369	9.57384	4.31557	0.000354131	0.00889253	-0.0832577	MTMR3	myotubularin related protein 3	protein serine/threonine phosphatase activity /// protein tyrosine phosphatase activity /// membrane fraction /// cytoplasm /// protein amino acid dephosphorylation /// zinc ion binding /// membrane /// hydrolase activity /// metal ion binding
8130565	0.446351	1.36259	8.37203	4.36272	0.000317643	0.0082372	0.023806	---	---	---
7905324	0.442435	1.3589	9.16433	4.39033	0.000298064	0.00783318	0.086478	C1orf56	chromosome 1 open reading frame 56	extracellular region
8167973	0.440702	1.35727	5.64895	5.18734	4.84211e-05	0.00198556	1.88432	HEPH	hephaestin	copper ion binding /// ion transport /// copper ion transport /// iron ion transport /// membrane /// integral to membrane /// oxidoreductase activity /// erythrocyte differentiation /// metal ion binding /// oxidation reduction /// iron ion binding
8114300	0.439703	1.35633	6.91158	4.31393	0.000355467	0.00891887	-0.0869648	KLHL3	kelch-like 3 (Drosophila)	actin binding /// structural molecule activity /// protein binding /// cytoplasm /// cytoskeleton /// modification-dependent protein catabolic process
8116335	0.436473	1.35329	8.61622	4.35869	0.000320608	0.00830588	0.0146557	SQSTM1 /// C5orf45	sequestosome 1 /// chromosome 5 open reading frame 45	protein kinase C binding /// protein binding /// nucleus /// nucleoplasm /// cytoplasm /// late endosome /// cytosol /// cytosol /// cytosol /// ubiquitin-dependent protein catabolic process /// apoptosis /// anti-apoptosis /// response to stress /// immune response /// protein localization /// zinc ion binding /// induction of apoptosis by extracellular signals /// endosome transport /// chapero…
8007594	0.43599	1.35284	8.84036	4.46577	0.000250533	0.00685455	0.257719	TMUB2	transmembrane and ubiquitin-like domain containing 2	membrane /// integral to membrane
8127743	0.433502	1.35051	8.12743	4.33726	0.000336852	0.00859477	-0.0340144	HMGN3	high mobility group nucleosomal binding domain 3	chromatin /// DNA binding /// chromatin binding /// protein binding /// nucleus /// biological_process /// thyroid hormone receptor binding
8156116	0.432731	1.34979	8.66035	4.86901	9.95157e-05	0.00344446	1.1702	C9orf103	chromosome 9 open reading frame 103	nucleotide binding /// molecular_function /// shikimate kinase activity /// ATP binding /// cellular_component /// carbohydrate metabolic process /// biological_process /// transferase activity /// gluconokinase activity
8134680	0.43122	1.34837	9.01374	4.51469	0.000223872	0.00627464	0.368713	ZKSCAN1	zinc finger with KRAB and SCAN domains 1	transcription factor activity /// intracellular /// nucleus /// nucleus /// cytoplasm /// mitochondrion /// regulation of transcription, DNA-dependent /// zinc ion binding /// metal ion binding
8042161	0.429146	1.34644	9.71852	4.54827	0.000207248	0.00595403	0.444867	PEX13	peroxisomal biogenesis factor 13	fatty acid alpha-oxidation /// neuron migration /// suckling behavior /// protein binding /// membrane fraction /// peroxisome /// peroxisomal membrane /// integral to peroxisomal membrane /// locomotory behavior /// protein transport /// membrane /// integral to membrane /// protein import into peroxisome matrix, docking /// protein import into peroxisome matrix, docking /// cerebral cortex cell…
8088106	0.427622	1.34501	12.5629	4.52853	0.000216866	0.00611948	0.40009	TKT	transketolase	transketolase activity /// protein binding /// cytosol /// metabolic process /// transferase activity /// metal ion binding /// transketolase activity /// calcium ion binding /// regulation of growth
8036923	0.427224	1.34464	9.63255	4.53022	0.000216023	0.00610603	0.403936	NUMBL	numb homolog (Drosophila)-like	protein binding /// cytoplasm /// nervous system development /// neuroblast proliferation /// axonogenesis /// cytokine-mediated signaling pathway /// protein metabolic process /// lateral ventricle development /// neuroblast division in the subventricular zone /// forebrain development /// adherens junction organization /// positive regulation of neurogenesis /// positive regulation of dendrite …
8041937	0.426994	1.34443	7.80031	5.04761	6.63581e-05	0.00250513	1.57174	FLJ46838 /// STON1	FLJ46838 protein /// stonin 1	protein binding /// nucleus /// cytoplasm /// intracellular protein transport /// membrane /// regulation of endocytosis /// clathrin adaptor complex
7906978	0.425636	1.34316	11.7635	5.09719	5.93259e-05	0.00229698	1.68282	MGST3	microsomal glutathione S-transferase 3	glutathione transferase activity /// peroxidase activity /// membrane fraction /// endoplasmic reticulum /// endoplasmic reticulum membrane /// microsome /// lipid metabolic process /// signal transduction /// membrane /// integral to membrane /// transferase activity /// glutathione transferase activity /// microsome
7957253	0.425373	1.34292	4.22345	4.35804	0.000321091	0.00830588	0.013174	GLIPR1L2	GLI pathogenesis-related 1 like 2	extracellular region /// membrane /// integral to membrane
7963024	0.424538	1.34214	8.71663	4.57157	0.00019645	0.00572283	0.497693	LMBR1L	limb region 1 homolog (mouse)-like	receptor activity /// plasma membrane /// endocytosis /// integral to membrane
8080028	0.423999	1.34164	6.84403	4.31983	0.000350667	0.0088322	-0.0735828	---	---	---
8053142	0.420562	1.33845	8.57836	4.32668	0.000345172	0.0087533	-0.0580341	RTKN	rhotekin	nucleotide binding /// GTPase inhibitor activity /// protein binding /// GTP binding /// cellular_component /// intracellular /// apoptosis /// signal transduction /// Rho protein signal transduction /// GTP-Rho binding /// regulation of anti-apoptosis
8155393	0.418601	1.33663	9.00393	4.82438	0.000110165	0.0036903	1.06956	MGC21881 /// LOC554249	hypothetical locus MGC21881 /// hypothetical LOC554249	---
8161451	0.418601	1.33663	9.00393	4.82438	0.000110165	0.0036903	1.06956	MGC21881 /// LOC554249	hypothetical locus MGC21881 /// hypothetical LOC554249	---
8104321	0.412041	1.33057	8.4905	4.25641	0.000405927	0.00996851	-0.217563	ADAMTS16	ADAM metallopeptidase with thrombospondin type 1 motif, 16	metalloendopeptidase activity /// extracellular region /// proteinaceous extracellular matrix /// proteolysis /// peptidase activity /// zinc ion binding /// metal ion binding
7988644	0.410039	1.32872	5.28287	4.6103	0.000179745	0.00536286	0.585462	ATP8B4	ATPase, class I, type 8B, member 4	nucleotide binding /// magnesium ion binding /// phospholipid-translocating ATPase activity /// ATP binding /// ATP biosynthetic process /// ATPase activity, coupled to transmembrane movement of ions, phosphorylative mechanism /// phospholipid transport /// membrane /// integral to membrane /// hydrolase activity /// hydrolase activity, acting on acid anhydrides, catalyzing transmembrane movement…
8120981	0.40915	1.3279	6.54636	4.41764	0.000279887	0.00748546	0.148485	---	---	---
8145055	0.408564	1.32736	8.77995	4.42432	0.000275617	0.00739501	0.163639	BMP1	bone morphogenetic protein 1	skeletal system development /// cartilage condensation /// ossification /// metalloendopeptidase activity /// cytokine activity /// calcium ion binding /// extracellular space /// proteolysis /// multicellular organismal development /// growth factor activity /// peptidase activity /// metallopeptidase activity /// zinc ion binding /// cell differentiation /// membrane-bounded vesicle /// multice…
7964360	0.407918	1.32677	10.7837	4.61133	0.000179321	0.00535502	0.587793	STAT6	signal transducer and activator of transcription 6, interleukin-4 induced	negative regulation of T-helper 2 type immune response /// transcription factor activity /// signal transducer activity /// calcium ion binding /// protein binding /// nucleus /// nucleolus /// cytoplasm /// regulation of transcription from RNA polymerase II promoter /// signal transduction /// cytokine-mediated signaling pathway /// response to cytokine stimulus /// regulation of cell proliferat…
8163599	0.406497	1.32546	7.69028	4.2718	0.000391765	0.00967875	-0.182634	DFNB31	deafness, autosomal recessive 31	retina homeostasis /// photoreceptor inner segment /// stereocilia ankle link complex /// protein binding /// cytoplasm /// actin filament /// cilium /// synaptic transmission /// visual perception /// sensory perception of sound /// protein domain specific binding /// axon /// dendrite /// growth cone /// photoreceptor connecting cilium /// stereocilium /// neuronal cell body /// response to sti…
8038515	0.399475	1.31903	9.0559	4.27131	0.000392208	0.00967875	-0.183746	VRK3	vaccinia related kinase 3	nucleotide binding /// protein serine/threonine kinase activity /// protein binding /// ATP binding /// nucleus /// protein amino acid phosphorylation /// transferase activity
8030197	0.398868	1.31847	5.66543	4.41623	0.0002808	0.00749784	0.145274	---	---	---
7964701	0.396116	1.31596	11.3613	4.57952	0.0001929	0.00564908	0.515699	GNS	glucosamine (N-acetyl)-6-sulfatase	protein binding /// lysosome /// glycosaminoglycan catabolic process /// metabolic process /// N-acetylglucosamine-6-sulfatase activity /// sulfuric ester hydrolase activity /// hydrolase activity /// metal ion binding /// calcium ion binding /// N-acetylglucosamine-6-sulfatase activity
8074856	0.395716	1.3156	10.0745	4.87039	9.92034e-05	0.00344081	1.17332	PRAME	preferentially expressed antigen in melanoma	protein binding /// nucleus /// plasma membrane /// positive regulation of cell proliferation /// transcription repressor activity /// regulation of growth /// retinoic acid receptor binding /// negative regulation of apoptosis /// regulation of transcription /// negative regulation of cell differentiation /// negative regulation of retinoic acid receptor signaling pathway
7948656	0.395663	1.31555	10.6223	5.18116	4.90995e-05	0.00200597	1.87051	FTH1	ferritin, heavy polypeptide 1	ferroxidase activity /// iron ion binding /// protein binding /// cytosol /// iron ion transport /// cellular iron ion homeostasis /// intracellular sequestering of iron ion /// post-Golgi vesicle-mediated transport /// immune response /// intracellular ferritin complex /// ferric iron binding /// cell proliferation /// negative regulation of cell proliferation /// cellular membrane organization …
8057045	0.395408	1.31532	8.75664	4.64614	0.000165568	0.00503003	0.666631	FKBP7	FK506 binding protein 7	peptidyl-prolyl cis-trans isomerase activity /// calcium ion binding /// protein binding /// endoplasmic reticulum /// endoplasmic reticulum lumen /// protein folding /// isomerase activity
8084360	0.391872	1.3121	9.91579	4.39834	0.000292609	0.00773254	0.104677	ABCF3	ATP-binding cassette, sub-family F (GCN20), member 3	nucleotide binding /// ATP binding /// ATPase activity
8044793	0.391818	1.31205	10.1431	5.35225	3.34623e-05	0.00149317	2.25115	STEAP3	STEAP family member 3	ferric-chelate reductase activity /// binding /// iron ion binding /// endosome /// multivesicular body /// plasma membrane /// ion transport /// iron ion transport /// apoptosis /// cell cycle /// electron carrier activity /// protein secretion /// endosome membrane /// integral to membrane /// oxidoreductase activity /// metal ion binding /// FAD binding /// oxidation reduction /// copper ion b…
7985577	0.389686	1.31011	7.38528	5.26779	4.04207e-05	0.00172993	2.06356	ZSCAN2	zinc finger and SCAN domain containing 2	transcription factor activity /// intracellular /// nucleus /// regulation of transcription, DNA-dependent /// multicellular organismal development /// spermatogenesis /// zinc ion binding /// cell differentiation /// metal ion binding
8070257	0.379369	1.30077	8.36813	5.10538	5.824e-05	0.00226809	1.70115	PIGP	phosphatidylinositol glycan anchor biosynthesis, class P	molecular_function /// biological_process /// membrane /// integral to membrane /// preassembly of GPI anchor in ER membrane /// transferase activity, transferring glycosyl groups /// phosphatidylinositol N-acetylglucosaminyltransferase activity
7923489	0.376734	1.2984	9.41887	4.93473	8.57043e-05	0.00305862	1.31819	KLHL12	kelch-like 12 (Drosophila)	protein binding /// Wnt receptor signaling pathway /// modification-dependent protein catabolic process
8034034	0.376303	1.29801	9.77353	4.60563	0.00018168	0.00539161	0.574885	KEAP1	kelch-like ECH-associated protein 1	in utero embryonic development /// protein binding /// nucleus /// nucleolus /// cytoplasm /// endoplasmic reticulum /// centrosome /// cell-cell adherens junction /// focal adhesion /// transcription regulator activity /// regulation of transcription /// regulation of epidermal cell differentiation /// nucleus /// cytoplasm
7958761	0.373708	1.29568	8.09627	4.3798	0.000305382	0.00798356	0.0625828	ACAD10 /// ACAD10	acyl-Coenzyme A dehydrogenase family, member 10 /// acyl-CoA dehydrogenase family, member 10	acyl-CoA dehydrogenase activity /// hydrolase activity /// FAD binding /// oxidation reduction /// metabolic process /// electron carrier activity
8076161	0.37077	1.29304	7.26838	4.32397	0.000347332	0.00878809	-0.0641765	UNC84B /// DNAL4	unc-84 homolog B (C. elegans) /// dynein, axonemal, light chain 4	microtubule motor activity /// microtubule motor activity /// centrosome /// axonemal dynein complex /// microtubule /// plasma membrane /// microtubule-based movement /// ATPase activity, coupled /// nuclear chromosome, telomeric region /// condensed nuclear chromosome /// protein binding /// nucleus /// endosome /// nuclear envelope organization /// mitotic spindle organization /// nuclear migr…
8163505	0.361864	1.28509	7.71072	4.28282	0.000381924	0.00948316	-0.157608	HDHD3	haloacid dehalogenase-like hydrolase domain containing 3	protein binding /// mitochondrion /// metabolic process /// phosphoglycolate phosphatase activity /// hydrolase activity
7969003	0.360219	1.28362	12.0514	4.44402	0.000263392	0.00712112	0.208362	ITM2B	integral membrane protein 2B	Golgi membrane /// beta-amyloid binding /// ATP binding /// Golgi apparatus /// apoptosis /// induction of apoptosis /// nervous system development /// membrane /// integral to membrane
7957570	0.334587	1.26102	6.14983	4.5593	0.000202064	0.0058404	0.469872	PLXNC1	plexin C1	receptor activity /// receptor binding /// intracellular /// plasma membrane /// cell adhesion /// signal transduction /// multicellular organismal development /// integral to membrane /// plasma membrane
8104506	0.327606	1.25493	11.2649	4.45477	0.000256955	0.00698436	0.232757	TRIO	triple functional domain (PTPRF interacting)	nucleotide binding /// protein serine/threonine kinase activity /// guanyl-nucleotide exchange factor activity /// Rho guanyl-nucleotide exchange factor activity /// ATP binding /// intracellular /// cytoplasm /// cytosol /// protein amino acid phosphorylation /// apoptosis /// transmembrane receptor protein tyrosine phosphatase signaling pathway /// induction of apoptosis by extracellular signal…
8005557	-0.298209	0.813261	8.73898	-4.3111	0.000357797	0.00895083	-0.0933935	EPN2	epsin 2	cytoplasm /// lipid binding /// regulation of endocytosis /// clathrin coat of endocytic vesicle /// clathrin-coated vesicle /// cytoplasmic vesicle /// endocytosis
7988050	-0.30003	0.812235	6.63836	-4.27151	0.000392026	0.00967875	-0.183289	TGM5	transglutaminase 5	protein-glutamine gamma-glutamyltransferase activity /// cytoplasm /// protein modification process /// acyltransferase activity /// epidermis development /// transferase activity /// peptide cross-linking /// metal ion binding /// protein-glutamine gamma-glutamyltransferase activity /// calcium ion binding
8003679	-0.317834	0.802273	10.2284	-4.70324	0.000145276	0.0045463	0.795866	RPA1	replication protein A1, 70kDa	nucleotide-excision repair, DNA damage removal /// double-strand break repair via homologous recombination /// condensed nuclear chromosome /// male germ cell nucleus /// in utero embryonic development /// DNA binding /// chromatin binding /// single-stranded DNA binding /// protein binding /// nucleus /// nucleoplasm /// DNA replication factor A complex /// cytoplasm /// cytoskeleton /// DNA rep…
8170443	-0.327737	0.796786	9.81433	-4.30138	0.000365916	0.00912651	-0.115476	MTMR1	myotubularin related protein 1	protein tyrosine phosphatase activity /// cellular_component /// plasma membrane /// dephosphorylation /// hydrolase activity /// phosphatase activity
8011200	-0.34377	0.78798	8.65119	-4.82635	0.000109672	0.0036849	1.074	SMYD4	SET and MYND domain containing 4	binding /// zinc ion binding /// metal ion binding
8018937	-0.34651	0.786484	9.10244	-4.61841	0.000176433	0.00529728	0.603832	USP36	ubiquitin specific peptidase 36	ubiquitin thiolesterase activity /// nucleus /// nucleolus /// ubiquitin-dependent protein catabolic process /// peptidase activity /// cysteine-type peptidase activity /// nucleolus
7950501	-0.347363	0.786019	9.09888	-4.34877	0.000328025	0.00844005	-0.00786871	GDPD5	glycerophosphodiester phosphodiesterase domain containing 5	cytoplasm /// glycerol metabolic process /// lipid metabolic process /// nervous system development /// glycerophosphodiester phosphodiesterase activity /// endomembrane system /// membrane /// integral to membrane /// hydrolase activity /// growth cone /// cell projection /// perinuclear region of cytoplasm
7971361	-0.349925	0.784625	10.7637	-4.46625	0.000250256	0.00685352	0.258809	NUFIP1	nuclear fragile X mental retardation protein interacting protein 1	box C/D snoRNP assembly /// DNA binding /// RNA binding /// protein binding /// intracellular /// nucleus /// perichromatin fibrils /// nucleolus /// RNA processing /// transcription elongation factor complex /// zinc ion binding /// nuclear matrix /// cytosolic ribosome /// snoRNA binding /// protein binding, bridging /// identical protein binding /// positive regulation of transcription from RN…
7999326	-0.35481	0.781973	11.636	-4.45755	0.000255316	0.00695683	0.23907	USP7	ubiquitin specific peptidase 7 (herpes virus-associated)	p53 binding /// cysteine-type endopeptidase activity /// ubiquitin thiolesterase activity /// ubiquitin-specific protease activity /// protein binding /// nucleus /// ubiquitin-dependent protein catabolic process /// protein C-terminus binding /// peptidase activity /// protein deubiquitination /// interspecies interaction between organisms
7936614	-0.360572	0.778856	12.0381	-4.34557	0.000330454	0.0084824	-0.0151331	EIF3A	eukaryotic translation initiation factor 3, subunit A	formation of translation initiation complex /// translation initiation factor activity /// translation initiation factor activity /// structural molecule activity /// protein binding /// nucleus /// cytoplasm /// cytosol /// eukaryotic translation initiation factor 3 complex /// translational initiation
8013804	-0.363698	0.77717	7.96243	-4.44387	0.000263484	0.00712112	0.208018	DHRS13	dehydrogenase/reductase (SDR family) member 13	binding /// extracellular region /// oxidoreductase activity /// oxidation reduction
8032530	-0.364023	0.776995	10.7144	-5.28707	3.87121e-05	0.00168277	2.10644	SGTA	small glutamine-rich tetratricopeptide repeat (TPR)-containing, alpha	protein binding /// cytoplasm /// biological_process /// interspecies interaction between organisms /// protein binding /// cellular_component
7992337	-0.368018	0.774846	10.468	-4.85515	0.000102707	0.00351835	1.13895	CRAMP1L /// HN1L	Crm, cramped-like (Drosophila) /// hematological and neurological expressed 1-like	nucleus /// cytoplasm /// DNA binding
8077851	-0.375773	0.770692	8.3592	-4.74591	0.000131773	0.0042108	0.89234	HRH1	histamine receptor H1	receptor activity /// G-protein coupled receptor activity /// histamine receptor activity /// plasma membrane /// integral to plasma membrane /// inflammatory response /// signal transduction /// G-protein coupled receptor protein signaling pathway /// activation of phospholipase C activity by G-protein coupled receptor protein signaling pathway coupled to IP3 second messenger /// synaptic transm…
8144880	-0.378631	0.769167	8.94089	-4.79567	0.00011762	0.00387636	1.00475	SH2D4A	SH2 domain containing 4A	protein binding /// cytoplasm
7927389	-0.380698	0.768066	10.1518	-4.39665	0.000293752	0.0077566	0.100835	MAPK8	mitogen-activated protein kinase 8	nucleotide binding /// ossification /// protein serine/threonine kinase activity /// JUN kinase activity /// MAP kinase activity /// protein binding /// ATP binding /// nucleus /// nucleoplasm /// cytoplasm /// cytosol /// apoptosis /// cellular component movement /// response to stress /// signal transduction /// JNK cascade /// JUN phosphorylation /// induction of apoptosis by extracellular sig…
8014199	-0.38135	0.767719	8.70041	-4.61329	0.000178516	0.00534454	0.592237	RAD51L3	RAD51-like 3 (S. cerevisiae)	nucleotide binding /// DNA binding /// protein binding /// ATP binding /// nucleus /// DNA repair /// reciprocal meiotic recombination /// DNA-dependent ATPase activity /// nucleoside-triphosphatase activity /// DNA binding /// nucleus /// base-excision repair /// response to DNA damage stimulus
7996934	-0.382583	0.767063	11.9155	-4.80219	0.000115883	0.00382504	1.01947	NIP7	nuclear import 7 homolog (S. cerevisiae)	RNA binding /// protein binding /// nucleus /// nucleolus /// ribosome assembly
7948667	-0.383624	0.76651	11.0667	-4.33789	0.000336363	0.00858886	-0.0325827	AHNAK	AHNAK nucleoprotein	protein binding /// nucleus /// nervous system development
8135422	-0.390418	0.762909	9.25919	-4.27076	0.000392708	0.00967875	-0.185	BCAP29	B-cell receptor-associated protein 29	endoplasmic reticulum /// endoplasmic reticulum membrane /// intracellular protein transport /// apoptosis /// membrane /// integral to membrane /// vesicle-mediated transport
8167965	-0.390662	0.76278	12.5572	-4.35717	0.000321735	0.00831095	0.0111989	MSN	moesin	uropod /// actin binding /// receptor binding /// structural constituent of cytoskeleton /// protein binding /// nucleus /// nucleolus /// cytoplasm /// cytoskeleton /// plasma membrane /// microvillus /// cellular component movement /// leukocyte cell-cell adhesion /// internal side of plasma membrane /// basolateral plasma membrane /// apical plasma membrane /// extrinsic to membrane /// membra…
7926807	-0.392672	0.761718	10.8191	-4.55672	0.000203265	0.00586491	0.464025	PDSS1	prenyl (decaprenyl) diphosphate synthase, subunit 1	trans-hexaprenyltranstransferase activity /// ubiquinone biosynthetic process /// isoprenoid biosynthetic process /// transferase activity /// metal ion binding /// protein heterodimerization activity /// trans-octaprenyltranstransferase activity /// protein heterotetramerization
7903079	-0.401041	0.757312	11.4469	-4.53188	0.000215202	0.00609317	0.407694	DR1	down-regulator of transcription 1, TBP-binding (negative cofactor 2)	negative regulation of transcription from RNA polymerase II promoter /// DNA binding /// transcription corepressor activity /// intracellular /// nucleus /// transcription factor binding /// sequence-specific DNA binding /// regulation of transcription
8109585	-0.403282	0.756136	7.54014	-5.10539	5.82378e-05	0.00226809	1.70118	LSM11	LSM11, U7 small nuclear RNA associated	S phase of mitotic cell cycle /// RNA binding /// protein binding /// protein binding /// nucleus /// U7 snRNP /// U7 snRNP /// mRNA processing /// histone mRNA 3'-end processing /// histone pre-mRNA 3'end processing complex /// U7 snRNA binding /// nucleus /// RNA splicing /// ribonucleoprotein complex
8173269	-0.4041	0.755707	9.98583	-5.05159	6.57634e-05	0.00249399	1.58067	LAS1L	LAS1-like (S. cerevisiae)	protein binding /// nucleus /// nucleolus /// MLL1 complex
8068866	-0.412806	0.751161	8.97947	-4.25638	0.000405961	0.00996851	-0.217646	NDUFV3 /// PKNOX1	NADH dehydrogenase (ubiquinone) flavoprotein 3, 10kDa /// PBX/knotted 1 homeobox 1	angiogenesis /// transcription factor activity /// specific RNA polymerase II transcription factor activity /// RNA polymerase II transcription factor activity, enhancer binding /// protein binding /// nucleus /// transcription factor complex /// cytoplasm /// hemopoiesis /// T cell differentiation /// erythrocyte differentiation /// camera-type eye development /// sequence-specific DNA binding /…
8107769	-0.413939	0.750571	9.49085	-4.85813	0.000102011	0.00350605	1.14568	SLC12A2	solute carrier family 12 (sodium/potassium/chloride transporters), member 2	transporter activity /// protein binding /// membrane fraction /// integral to plasma membrane /// transport /// ion transport /// potassium ion transport /// sodium ion transport /// hyperosmotic response /// gamma-aminobutyric acid signaling pathway /// sodium:potassium:chloride symporter activity /// symporter activity /// ammonium transport /// membrane /// basolateral plasma membrane /// api…
7916862	-0.415411	0.749806	10.922	-4.41458	0.000281865	0.00752025	0.141542	GPR177 /// WLS	G protein-coupled receptor 177 /// wntless homolog (Drosophila)	signal transducer activity /// membrane /// integral to membrane /// positive regulation of I-kappaB kinase/NF-kappaB cascade
8099051	-0.415705	0.749653	10.3068	-4.48153	0.000241614	0.00666314	0.29347	NOP14	NOP14 nucleolar protein homolog (yeast)	endonucleolytic cleavage in ITS1 to separate SSU-rRNA from 5.8S rRNA and LSU-rRNA from tricistronic rRNA transcript (SSU-rRNA, 5.8S rRNA, LSU-rRNA) /// maturation of SSU-rRNA from tricistronic rRNA transcript (SSU-rRNA, 5.8S rRNA, LSU-rRNA) /// endonucleolytic cleavage to generate mature 5'-end of SSU-rRNA from (SSU-rRNA, 5.8S rRNA, LSU-rRNA) /// endonucleolytic cleavage in 5'-ETS of tricistronic…
8087839	-0.417308	0.748821	8.23155	-4.40771	0.000286366	0.00759772	0.125929	WDR51A /// POC1A	WD repeat domain 51A /// POC1 centriolar protein homolog A (Chlamydomonas)	---
8135601	-0.418515	0.748194	11.7326	-4.48514	0.000239616	0.00661565	0.301663	MET	met proto-oncogene (hepatocyte growth factor receptor)	nucleotide binding /// protein tyrosine kinase activity /// receptor activity /// hepatocyte growth factor receptor activity /// protein binding /// ATP binding /// plasma membrane /// integral to plasma membrane /// protein amino acid phosphorylation /// signal transduction /// cell surface receptor linked signaling pathway /// multicellular organismal development /// cell proliferation /// basa…
7969703	-0.423557	0.745584	11.8384	-5.02532	6.97905e-05	0.00260225	1.52174	IPO5	importin 5	GTPase inhibitor activity /// protein binding /// nucleus /// nuclear pore /// nucleolus /// cytoplasm /// NLS-bearing substrate import into nucleus /// intracellular protein transport /// Ran GTPase binding /// protein transporter activity /// interspecies interaction between organisms /// protein import into nucleus, docking /// nucleus /// cytoplasm
8132667	-0.426224	0.744207	8.57974	-4.95275	8.2268e-05	0.00297424	1.35873	ADCY1	adenylate cyclase 1 (brain)	nucleotide binding /// adenylate cyclase activity /// calmodulin binding /// ATP binding /// plasma membrane /// plasma membrane /// cAMP biosynthetic process /// activation of adenylate cyclase activity by G-protein signaling pathway /// inhibition of adenylate cyclase activity by G-protein signaling pathway /// long-term memory /// calcium- and calmodulin-responsive adenylate cyclase activity /…
7933164	-0.427342	0.74363	11.3415	-4.8193	0.000111448	0.00371937	1.0581	HNRNPF	heterogeneous nuclear ribonucleoprotein F	nucleotide binding /// RNA binding /// protein binding /// nucleus /// nucleoplasm /// spliceosomal complex /// nucleolus /// cytoplasm /// RNA processing /// mRNA processing /// RNA splicing /// TATA-binding protein binding /// heterogeneous nuclear ribonucleoprotein complex /// regulation of RNA splicing /// nuclear mRNA splicing, via spliceosome /// RNA binding /// nucleus
8061368	-0.431147	0.741672	8.88775	-4.97319	7.85399e-05	0.00285808	1.40468	NXT1	NTF2-like export factor 1	protein binding /// intracellular /// nucleus /// nuclear pore /// cytoplasm /// RNA export from nucleus /// protein export from nucleus /// Ran GTPase binding /// protein transport /// nuclear pore /// cytoplasm
8143367	-0.432781	0.740832	9.46722	-4.27689	0.000387188	0.00959767	-0.171075	SLC37A3	solute carrier family 37 (glycerol-3-phosphate transporter), member 3	carbohydrate transport /// membrane /// integral to membrane /// transmembrane transport
7921110	-0.43308	0.740679	11.2149	-4.32625	0.000345508	0.0087533	-0.0589915	ISG20L2	interferon stimulated exonuclease gene 20kDa-like 2	nucleic acid binding /// exonuclease activity /// protein binding /// intracellular /// nucleus /// nucleolus /// hydrolase activity /// ribosome biogenesis
8098508	-0.434118	0.740146	8.25855	-5.04954	6.60696e-05	0.00250275	1.57606	ING2	inhibitor of growth family, member 2	DNA binding /// chromatin binding /// protein binding /// nucleus /// regulation of transcription, DNA-dependent /// signal transduction /// zinc ion binding /// transcription activator activity /// chromatin modification /// Sin3 complex /// CCAAT-binding factor complex /// positive regulation of transforming growth factor beta receptor signaling pathway /// protein complex binding /// regulatio…
7965094	-0.436345	0.739004	11.5133	-4.28892	0.000376589	0.00935768	-0.143769	E2F7	E2F transcription factor 7	transcription factor activity /// protein binding /// nucleus /// transcription factor complex /// regulation of transcription, DNA-dependent /// cell cycle /// negative regulation of cell proliferation /// transcription repressor activity /// identical protein binding
7934615	-0.437058	0.738639	9.42582	-4.84508	0.00010509	0.00357789	1.11624	DLG5	discs, large homolog 5 (Drosophila)	intracellular /// cytoplasm /// plasma membrane /// cell-cell adherens junction /// signal transduction /// beta-catenin binding /// cytoskeletal protein binding /// negative regulation of cell proliferation /// cell-cell adhesion /// cell junction /// receptor signaling complex scaffold activity /// regulation of apoptosis /// protein binding /// intracellular signaling cascade
8065596	-0.437064	0.738636	8.52742	-4.50872	0.00022697	0.00632949	0.355154	PDRG1	p53 and DNA-damage regulated 1	cytoplasm /// protein folding /// prefoldin complex /// unfolded protein binding
8122634	-0.437928	0.738194	6.99747	-4.39354	0.000295863	0.00779378	0.093782	SAMD5	sterile alpha motif domain containing 5	---
8072374	-0.439059	0.737616	7.98742	-4.76374	0.000126513	0.00409379	0.932637	SLC35E4 /// DUSP18	solute carrier family 35, member E4 /// dual specificity phosphatase 18	protein tyrosine phosphatase activity /// nucleus /// cytoplasm /// protein amino acid dephosphorylation /// hydrolase activity /// MAP kinase tyrosine/serine/threonine phosphatase activity /// membrane /// integral to membrane
8065344	-0.439906	0.737183	7.96053	-4.41691	0.000280362	0.00749214	0.146814	FOXA2	forkhead box A2	ectoderm formation /// double-stranded DNA binding /// transcription factor activity /// RNA polymerase II transcription factor activity, enhancer binding /// nucleus /// cytoplasm /// regulation of transcription, DNA-dependent /// pattern specification process /// blood coagulation /// anterior/posterior pattern formation /// regulation of gene-specific transcription from RNA polymerase II promo…
8006690	-0.441104	0.736571	11.2162	-5.08098	6.15374e-05	0.00235789	1.64653	AATF	apoptosis antagonizing transcription factor	transcription factor activity /// protein binding /// nucleus /// nucleolus /// cytoplasm /// Golgi apparatus /// apoptosis /// anti-apoptosis /// response to DNA damage stimulus /// cell adhesion /// regulation of mitotic cell cycle /// induction of apoptosis by extracellular signals /// negative regulation of oxygen and reactive oxygen species metabolic process /// protein domain specific bindi…
8145259	-0.446655	0.733742	8.97759	-4.37858	0.000306244	0.00799765	0.0598054	CHMP7	CHMP family, member 7	ESCRT III complex /// cytoplasm /// protein transporter activity /// protein transport /// late endosome to vacuole transport
8022380	-0.447152	0.733489	8.74718	-4.57795	0.000193596	0.00566448	0.512142	CEP76	centrosomal protein 76kDa	protein binding /// cytoplasm /// centriole /// microtubule organizing center /// cytosol /// cytoskeleton /// regulation of centriole replication
7957737	-0.448352	0.73288	11.5739	-4.62723	0.000172901	0.00520531	0.623811	TMPO	thymopoietin	chromatin /// DNA binding /// protein binding /// lamin binding /// nucleus /// nuclear envelope /// nuclear envelope /// nuclear inner membrane /// chromosome /// membrane /// integral to membrane /// nuclear membrane /// regulation of transcription /// nucleus
8156506	-0.448772	0.732666	8.34923	-4.61294	0.000178659	0.00534454	0.591445	PTPDC1	protein tyrosine phosphatase domain containing 1	protein tyrosine phosphatase activity /// protein amino acid dephosphorylation /// protein tyrosine/serine/threonine phosphatase activity /// hydrolase activity
8011861	-0.452886	0.73058	9.99802	-4.82295	0.000110524	0.00369862	1.06633	DHX33	DEAH (Asp-Glu-Ala-His) box polypeptide 33	nucleotide binding /// nucleic acid binding /// helicase activity /// ATP binding /// nucleus /// nucleolus /// ATP-dependent helicase activity /// hydrolase activity
8002057	-0.453599	0.730219	8.99673	-5.21921	4.50749e-05	0.00188314	1.95538	ACD	adrenocortical dysplasia homolog (mouse)	telomere maintenance /// chromosome, telomeric region /// nuclear telomere cap complex /// skeletal system development /// urogenital system development /// DNA binding /// protein binding /// nucleus /// nucleoplasm /// chromosome /// intracellular protein transport /// telomere capping /// telomere capping /// embryonic limb morphogenesis /// protection from non-homologous end joining at telome…
8117237	-0.454147	0.729941	11.3017	-4.56743	0.000198325	0.00576233	0.488313	---	---	---
8107632	-0.456719	0.728642	9.06462	-4.50721	0.000227758	0.00634086	0.351731	SNX24	sorting nexin 24	protein binding /// cell communication /// protein transport /// phosphoinositide binding
8136401	-0.458765	0.727609	10.7946	-4.81918	0.000111479	0.00371937	1.05782	NUP205	nucleoporin 205kDa	protein import into nucleus, docking /// protein binding /// nucleus /// nuclear envelope /// nuclear pore /// nucleocytoplasmic transport /// protein transport /// mRNA transport /// transmembrane transport /// intracellular protein transmembrane transport
7932826	-0.460447	0.726761	7.99537	-5.27887	3.94291e-05	0.00169623	2.08822	KIAA1462	KIAA1462	---
8104234	-0.461901	0.726029	12.1801	-5.37393	3.18821e-05	0.00145024	2.29919	TRIP13 /// BRD9	thyroid hormone receptor interactor 13 /// bromodomain containing 9	nucleotide binding /// pachytene /// oocyte maturation /// male germ cell nucleus /// transcription cofactor activity /// protein binding /// ATP binding /// nucleus /// double-strand break repair /// transcription from RNA polymerase II promoter /// reciprocal meiotic recombination /// male meiosis I /// female meiosis I /// spermatid development /// nucleoside-triphosphatase activity /// identi…
8035236	-0.463711	0.725119	7.56087	-4.86252	0.000100997	0.00348124	1.15558	HAUS8	HAUS augmin-like complex, subunit 8	spindle pole /// molecular_function /// cytoplasm /// microtubule organizing center /// cytoskeleton /// microtubule /// cell cycle /// mitosis /// spindle assembly /// centrosome organization /// cell division /// HAUS complex /// centrosome /// spindle
7911993	-0.464279	0.724833	10.674	-6.37813	3.5977e-06	0.000266798	4.46875	ICMT	isoprenylcysteine carboxyl methyltransferase	in utero embryonic development /// liver development /// C-terminal protein carboxyl methyltransferase activity /// protein-S-isoprenylcysteine O-methyltransferase activity /// membrane fraction /// endoplasmic reticulum /// endoplasmic reticulum membrane /// protein modification process /// C-terminal protein amino acid methylation /// protein targeting to membrane /// protein localization /// c…
8099008	-0.464582	0.724681	6.98796	-4.99812	7.42246e-05	0.00273391	1.46069	ZFYVE28	zinc finger, FYVE domain containing 28	protein binding /// cytoplasm /// endosome /// cytosol /// negative regulation of epidermal growth factor receptor activity /// zinc ion binding /// membrane /// early endosome membrane /// phosphatidylinositol-3-phosphate binding /// negative regulation of epidermal growth factor receptor signaling pathway /// metal ion binding /// phosphatidylinositol 3-phosphate binding
8141419	-0.464947	0.724497	8.30185	-4.59913	0.000184411	0.00544837	0.560148	MIR25	microRNA 25	---
7985310	-0.466351	0.723793	9.22549	-4.69089	0.00014944	0.00462312	0.767931	FAM108C1	family with sequence similarity 108, member C1	hydrolase activity
8110090	-0.466887	0.723524	11.9518	-5.26447	4.07226e-05	0.00174062	2.05617	SFXN1	sideroflexin 1	protein binding /// mitochondrion /// mitochondrial inner membrane /// cation transport /// iron ion transport /// cation transmembrane transporter activity /// membrane /// integral to membrane /// erythrocyte differentiation /// transmembrane transport /// iron ion binding
8180310	-0.467703	0.723115	12.0082	-5.04589	6.66165e-05	0.00251204	1.56789	---	---	---
8008664	-0.467739	0.723097	10.2753	-4.37968	0.000305465	0.00798356	0.0623146	AKAP1	A kinase (PRKA) anchor protein 1	RNA binding /// protein binding /// cytoplasm /// mitochondrion /// mitochondrial outer membrane /// membrane /// integral to membrane /// protein kinase binding /// RNA binding /// mitochondrion
8122637	-0.470255	0.721837	8.91856	-4.58739	0.000189444	0.00557236	0.533554	SASH1	SAM and SH3 domain containing 1	protein binding
7947425	-0.472494	0.720718	12.1584	-4.6911	0.000149368	0.00462312	0.768405	CD59	CD59 molecule, complement regulatory protein	protein binding /// extracellular region /// membrane fraction /// plasma membrane /// cell surface receptor linked signaling pathway /// blood coagulation /// anchored to membrane /// anchored to external side of plasma membrane /// plasma membrane /// cell surface receptor linked signal transduction
8035628	-0.47351	0.72021	8.35512	-4.81856	0.000111636	0.00372085	1.05643	RFXANK /// NR2C2AP	regulatory factor X-associated ankyrin-containing protein /// nuclear receptor 2C2-associated protein	DNA binding /// transcription factor activity /// transcription cofactor activity /// protein binding /// nucleus /// cytoplasm /// Ras protein signal transduction /// regulation of transcription /// cell adhesion
7931479	-0.474481	0.719726	9.60466	-5.37662	3.16914e-05	0.00144552	2.30515	INPP5A	inositol polyphosphate-5-phosphatase, 40kDa	inositol or phosphatidylinositol phosphatase activity /// inositol-polyphosphate 5-phosphatase activity /// cell communication /// membrane /// hydrolase activity /// PH domain binding
7953166	-0.474842	0.719546	7.77971	-4.42062	0.000277972	0.00745219	0.155253	TSPAN9	tetraspanin 9	membrane fraction /// integral to plasma membrane /// membrane
8010946	-0.475797	0.719069	9.27927	-4.37007	0.000312307	0.00812412	0.0404939	GEMIN4	gem (nuclear organelle) associated protein 4	spliceosomal snRNP assembly /// protein binding /// nucleus /// nucleoplasm /// spliceosomal complex /// nucleolus /// cytoplasm /// cytosol /// rRNA processing /// mRNA processing /// RNA splicing /// Cajal body /// small nuclear ribonucleoprotein complex /// spliceosomal snRNP biogenesis /// nucleolus /// cytoplasm
8159111	-0.476096	0.71892	10.5135	-4.52312	0.000219576	0.00618025	0.387833	WDR5	WD repeat domain 5	protein binding /// nucleus /// chromatin modification /// histone methyltransferase complex /// histone methyltransferase activity (H3-K4 specific) /// regulation of transcription /// histone H3-K4 methylation /// MLL1 complex
8103630	-0.477585	0.718179	9.7766	-4.80605	0.000114867	0.00380272	1.02819	SH3RF1	SH3 domain containing ring finger 1	MAP-kinase scaffold activity /// protein binding /// cytoplasm /// Golgi apparatus /// induction of apoptosis /// zinc ion binding /// ligase activity /// lamellipodium /// regulation of JNK cascade /// metal ion binding /// perinuclear region of cytoplasm
7954655	-0.480655	0.716652	9.30489	-6.00866	7.91559e-06	0.000488989	3.68428	DDX12 /// DDX11 /// LOC642846	DEAD/H (Asp-Glu-Ala-Asp/His) box polypeptide 12 (CHL1-like helicase homolog, S. cerevisiae) /// DEAD/H (Asp-Glu-Ala-Asp/His) box polypeptide 11 (CHL1-like helicase homolog, S. cerevisiae) /// DEAD/H (Asp-Glu-Ala-Asp/His) box polypeptide 11-like	mitotic sister chromatid segregation /// S phase of mitotic cell cycle /// G2/M transition of mitotic cell cycle /// nucleotide binding /// DNA binding /// DNA helicase activity /// RNA binding /// ATP-dependent DNA helicase activity /// helicase activity /// ATP binding /// nucleus /// nucleolus /// nucleobase, nucleoside, nucleotide and nucleic acid metabolic process /// cell cycle /// positive…
8140955	-0.481802	0.716083	11.2394	-4.32602	0.000345695	0.0087533	-0.0595239	CDK6	cyclin-dependent kinase 6	G1 phase of mitotic cell cycle /// nucleotide binding /// cyclin-dependent protein kinase holoenzyme complex /// ruffle /// positive regulation of cell-matrix adhesion /// cyclin-dependent protein kinase activity /// protein binding /// ATP binding /// nucleus /// cytoplasm /// protein amino acid phosphorylation /// response to virus /// regulation of gene expression /// regulation of gene expres…
8019885	-0.483084	0.715447	10.5611	-4.87078	9.91165e-05	0.00344081	1.17418	SMCHD1	structural maintenance of chromosomes flexible hinge domain containing 1	protein binding /// ATP binding /// chromosome /// chromosome organization
8162803	-0.484105	0.714941	8.81067	-4.50937	0.000226628	0.00632949	0.356641	ANKS6	ankyrin repeat and sterile alpha motif domain containing 6	---
7984319	-0.485216	0.71439	10.5755	-4.89967	9.28113e-05	0.00325641	1.23927	MAP2K1 /// SNAPC5	mitogen-activated protein kinase kinase 1 /// small nuclear RNA activating complex, polypeptide 5, 19kDa	nucleotide binding /// activation of MAPK activity /// regulation of vascular smooth muscle contraction /// protein kinase activity /// protein serine/threonine kinase activity /// MAP kinase kinase activity /// protein tyrosine kinase activity /// receptor signaling protein tyrosine phosphatase activity /// protein binding /// ATP binding /// soluble fraction /// Golgi apparatus /// cytosol /// …
8140037	-0.485883	0.71406	10.5899	-6.08424	6.72694e-06	0.000435772	3.84615	BAZ1B	bromodomain adjacent to zinc finger domain, 1B	nucleotide binding /// condensed chromosome /// chromatin binding /// transcription factor activity /// protein tyrosine kinase activity /// non-membrane spanning protein tyrosine kinase activity /// protein binding /// ATP binding /// nucleus /// centromeric heterochromatin /// chromatin assembly or disassembly /// chromatin remodeling /// transcription /// response to DNA damage stimulus /// zi…
7984540	-0.486516	0.713747	11.3571	-4.31363	0.000355716	0.00891887	-0.0876521	KIF23	kinesin family member 23	mitotic spindle elongation /// nucleotide binding /// microtubule motor activity /// protein binding /// ATP binding /// nucleus /// nucleoplasm /// cytoplasm /// spindle /// cytoskeleton /// kinesin complex /// microtubule /// microtubule-based movement /// cell cycle /// mitosis /// midbody /// cell division /// microtubule motor activity /// nucleus /// spindle
7897685	-0.487142	0.713437	9.83086	-5.01864	7.0854e-05	0.00263306	1.50675	UBIAD1	UbiA prenyltransferase domain containing 1	prenyltransferase activity /// nucleus /// cytoplasm /// membrane /// integral to membrane
8109093	-0.487655	0.713184	9.292	-4.53192	0.000215181	0.00609317	0.40779	ABLIM3	actin binding LIM protein family, member 3	actin binding /// cytoplasm /// cytoskeleton organization /// zinc ion binding /// positive regulation of transcription from RNA polymerase II promoter /// metal ion binding
8094556	-0.489563	0.712241	11.4658	-4.94515	8.36995e-05	0.00300966	1.34164	PGM2	phosphoglucomutase 2	magnesium ion binding /// phosphoglucomutase activity /// cytoplasm /// carbohydrate metabolic process /// glucose metabolic process /// isomerase activity
7930213	-0.490758	0.711651	9.31003	-4.57019	0.000197074	0.00573598	0.494564	TAF5	TAF5 RNA polymerase II, TATA box binding protein (TBP)-associated factor, 100kDa	transcription factor activity /// transcription factor activity /// histone acetyltransferase activity /// protein binding /// nucleus /// nucleoplasm /// transcription factor TFIID complex /// nucleolus /// cytoplasm /// cytoskeleton /// transcription initiation from RNA polymerase II promoter /// transcription initiation from RNA polymerase II promoter /// RNA elongation from RNA polymerase II …
7912086	-0.49129	0.711389	11.0106	-7.11584	7.86072e-07	7.76672e-05	5.98096	NOL9	nucleolar protein 9	nucleus /// nucleolus
8020254	-0.491688	0.711193	10.5422	-4.31251	0.000356634	0.00892846	-0.0901905	SEH1L	SEH1-like (S. cerevisiae)	kinetochore /// condensed chromosome kinetochore /// nucleus /// nuclear envelope /// nuclear pore organization /// cell cycle /// chromosome segregation /// mitosis /// mitotic metaphase plate congression /// protein transport /// Nup107-160 complex /// Nup107-160 complex /// mRNA transport /// cell division /// attachment of spindle microtubules to kinetochore involved in mitotic sister chromat…
8051547	-0.491932	0.711072	8.53168	-4.53209	0.0002151	0.00609317	0.408162	PRKD3	protein kinase D3	nucleotide binding /// protein kinase C activity /// protein binding /// ATP binding /// cytoplasm /// protein amino acid phosphorylation /// activation of protein kinase C activity by G-protein coupled receptor protein signaling pathway /// membrane /// transferase activity /// metal ion binding /// protein kinase C activity /// protein amino acid phosphorylation /// intracellular signaling casc…
7974851	-0.492256	0.710913	12.2747	-4.25416	0.000408042	0.00999748	-0.222674	HIF1A	hypoxia inducible factor 1, alpha subunit (basic helix-loop-helix transcription factor)	response to hypoxia /// response to hypoxia /// epithelial to mesenchymal transition /// positive regulation of endothelial cell proliferation /// connective tissue replacement during inflammatory response /// transcription factor activity /// transcription factor activity /// RNA polymerase II transcription factor activity, enhancer binding /// signal transducer activity /// protein binding /// …
8008310	-0.493424	0.710337	8.57073	-5.16526	5.08874e-05	0.00206382	1.83502	EME1	essential meiotic endonuclease 1 homolog 1 (S. pombe)	DNA binding /// endonuclease activity /// protein binding /// nucleus /// nucleolus /// DNA repair /// DNA recombination /// hydrolase activity /// metal ion binding /// magnesium ion binding /// protein binding /// response to DNA damage stimulus
7996393	-0.494415	0.70985	10.8647	-4.35333	0.000324596	0.00835891	0.00248147	CBFB	core-binding factor, beta subunit	transcription factor activity /// RNA polymerase II transcription factor activity /// transcription coactivator activity /// protein binding /// cellular_component /// nucleus /// transcription from RNA polymerase II promoter /// osteoblast differentiation /// lymphocyte differentiation /// myeloid cell differentiation /// positive regulation of transcription from RNA polymerase II promoter /// c…
7908161	-0.494453	0.709831	9.3966	-4.5503	0.000206286	0.00594179	0.449458	C1orf21	chromosome 1 open reading frame 21	---
8138553	-0.494982	0.709571	9.42589	-4.50377	0.000229566	0.00637718	0.343931	FAM126A	family with sequence similarity 126, member A	signal transducer activity /// cellular_component /// cytoplasm /// biological_process /// membrane
7900235	-0.499394	0.707404	10.3745	-5.28071	3.92669e-05	0.00169616	2.09231	MACF1	microtubule-actin crosslinking factor 1	mesoderm formation /// actin binding /// actin binding /// calcium ion binding /// calcium ion binding /// protein binding /// cytoplasm /// cytoplasm /// cytoskeleton /// posttranslational protein targeting to membrane /// cellular component movement /// cell cycle arrest /// establishment or maintenance of cell polarity /// microtubule binding /// microtubule binding /// biological_process /// …
8001830	-0.500354	0.706933	8.94963	-4.65934	0.000160635	0.00491495	0.696524	CMTM4	CKLF-like MARVEL transmembrane domain containing 4	cytokine activity /// extracellular space /// chemotaxis /// membrane /// integral to membrane
7939341	-0.501915	0.706169	13.1546	-5.06326	6.40509e-05	0.00244296	1.60683	CD44	CD44 molecule (Indian blood group)	regulation of cell growth /// branching involved in ureteric bud morphogenesis /// blood vessel maturation /// healing during inflammatory response /// receptor activity /// receptor signaling protein activity /// protein binding /// collagen binding /// hyaluronic acid binding /// nucleus /// cytoplasm /// Golgi apparatus /// plasma membrane /// integral to plasma membrane /// focal adhesion ///…
8064976	-0.502703	0.705783	10.3622	-4.43269	0.000270353	0.00728044	0.182646	DNAJC9 /// FAM149B1	DnaJ (Hsp40) homolog, subfamily C, member 9 /// family with sequence similarity 149, member B1	heat shock protein binding
7963313	-0.503354	0.705465	8.92515	-5.85307	1.10895e-05	0.000619541	3.34891	GALNT6	UDP-N-acetyl-alpha-D-galactosamine:polypeptide N-acetylgalactosaminyltransferase 6 (GalNAc-T6)	Golgi membrane /// polypeptide N-acetylgalactosaminyltransferase activity /// sugar binding /// Golgi apparatus /// protein amino acid O-linked glycosylation /// membrane /// integral to membrane /// transferase activity, transferring glycosyl groups /// perinuclear region of cytoplasm /// polypeptide N-acetylgalactosaminyltransferase activity /// calcium ion binding /// Golgi apparatus /// manga…
8066254	-0.505362	0.704484	10.0271	-4.40479	0.000288294	0.00764277	0.119318	LOC388796	hypothetical LOC388796	---
8140129	-0.505421	0.704455	9.40218	-6.61588	2.18624e-06	0.000177983	4.96422	ABHD11	abhydrolase domain containing 11	molecular_function /// cellular_component /// biological_process /// hydrolase activity
7961031	-0.506836	0.703764	9.06918	-5.92627	9.45937e-06	0.000553548	3.50705	DDX12 /// DDX11 /// LOC642846 /// LOC100134008	DEAD/H (Asp-Glu-Ala-Asp/His) box polypeptide 12 (CHL1-like helicase homolog, S. cerevisiae) /// DEAD/H (Asp-Glu-Ala-Asp/His) box polypeptide 11 (CHL1-like helicase homolog, S. cerevisiae) /// DEAD/H (Asp-Glu-Ala-Asp/His) box polypeptide 11-like /// similar to DEAD/H (Asp-Glu-Ala-Asp/His) box polypeptide 11 (CHL1-like helicase homolog, S. cerevisiae)	mitotic sister chromatid segregation /// S phase of mitotic cell cycle /// G2/M transition of mitotic cell cycle /// nucleotide binding /// DNA binding /// DNA helicase activity /// RNA binding /// ATP-dependent DNA helicase activity /// helicase activity /// ATP binding /// nucleus /// nucleolus /// nucleobase, nucleoside, nucleotide and nucleic acid metabolic process /// cell cycle /// positive…
7913357	-0.509249	0.702588	10.9605	-4.46619	0.000250289	0.00685352	0.258678	ECE1	endothelin converting enzyme 1	response to hypoxia /// positive regulation of receptor recycling /// regulation of systemic arterial blood pressure by endothelin /// endopeptidase activity /// metalloendopeptidase activity /// membrane fraction /// endosome /// Golgi apparatus /// plasma membrane /// apoptosis /// heart development /// peptidase activity /// external side of plasma membrane /// substance P catabolic process //…
8060988	-0.509328	0.70255	9.99107	-4.41008	0.000284802	0.00756224	0.131328	BTBD3	BTB (POZ) domain containing 3	protein binding
8036676	-0.51	0.702222	9.98943	-4.77917	0.000122132	0.0039899	0.967508	SARS2 /// FBXO17	seryl-tRNA synthetase 2, mitochondrial /// F-box protein 17	protein binding /// protein catabolic process /// nucleotide binding /// serine-tRNA ligase activity /// protein binding /// ATP binding /// cytoplasm /// mitochondrion /// mitochondrial matrix /// seryl-tRNA aminoacylation /// ligase activity
8122426	-0.510304	0.702075	9.46729	-5.33572	3.47202e-05	0.0015353	2.2145	PHACTR2	phosphatase and actin regulator 2	actin binding /// phosphoprotein phosphatase inhibitor activity /// protein binding
8041592	-0.510508	0.701975	10.8099	-5.11754	5.66641e-05	0.0022275	1.72835	EML4	echinoderm microtubule associated protein like 4	molecular_function /// protein binding /// cytoplasm /// microtubule /// microtubule-based process /// mitosis
8028389	-0.511139	0.701668	7.57377	-4.7713	0.000124347	0.00403939	0.949723	SPRED3	sprouty-related, EVH1 domain containing 3	inactivation of MAPK activity /// plasma membrane /// multicellular organismal development /// regulation of signal transduction
8046373	-0.51261	0.700953	8.24795	-4.97352	7.84821e-05	0.00285808	1.40541	DLX1	distal-less homeobox 1	negative regulation of transcription from RNA polymerase II promoter /// DNA binding /// chromatin binding /// transcription factor activity /// nucleus /// regulation of transcription, DNA-dependent /// multicellular organismal development /// proximal/distal pattern formation /// hippocampus development /// forebrain neuron differentiation /// regulation of transcription from RNA polymerase II …
8083214	-0.513146	0.700693	8.6039	-4.98717	7.60895e-05	0.00278718	1.43609	CHST2	carbohydrate (N-acetylglucosamine-6-O) sulfotransferase 2	N-acetylglucosamine 6-O-sulfotransferase activity /// Golgi apparatus /// trans-Golgi network /// carbohydrate metabolic process /// N-acetylglucosamine metabolic process /// sulfur metabolic process /// inflammatory response /// multicellular organismal development /// sulfotransferase activity /// membrane /// integral to membrane /// transferase activity /// intrinsic to Golgi membrane /// inf…
7896462	-0.513241	0.700647	8.86531	-5.21465	4.55384e-05	0.00189536	1.94523	---	---	---
7909164	-0.513916	0.700319	6.73374	-5.55428	2.13602e-05	0.00103908	2.69713	CTSE	cathepsin E	aspartic-type endopeptidase activity /// endosome /// proteolysis /// digestion /// peptidase activity /// antigen processing and presentation of exogenous peptide antigen via MHC class II /// protein homodimerization activity
8069565	-0.514227	0.700168	9.68291	-4.60865	0.000180427	0.00536879	0.581719	BTG3	BTG family, member 3	cytoplasm /// negative regulation of cell proliferation /// negative regulation of mitotic cell cycle
7968132	-0.514453	0.700058	10.5737	-4.68213	0.000152467	0.004705	0.748103	NUPL1	nucleoporin like 1	nucleocytoplasmic transporter activity /// protein binding /// nucleus /// nuclear envelope /// nuclear pore /// protein transport /// membrane /// nuclear membrane /// mRNA transport /// transmembrane transport /// intracellular protein transmembrane transport
7926299	-0.515005	0.69979	9.58914	-5.09815	5.9198e-05	0.00229698	1.68496	HSPA14	heat shock 70kDa protein 14	nucleotide binding /// ATP binding
7964347	-0.515791	0.699409	11.1202	-5.05786	6.48387e-05	0.00247018	1.59471	TMEM194A	transmembrane protein 194A	molecular_function /// biological_process /// membrane /// integral to membrane
8162236	-0.515954	0.69933	8.03983	-4.66007	0.000160367	0.00491237	0.698171	SEMA4D	sema domain, immunoglobulin domain (Ig), transmembrane domain (TM) and short cytoplasmic domain, (semaphorin) 4D	receptor activity /// receptor binding /// plasma membrane /// anti-apoptosis /// immune response /// cell adhesion /// multicellular organismal development /// nervous system development /// integral to membrane /// cell differentiation /// positive regulation of axonogenesis /// membrane
8064766	-0.51648	0.699076	9.31415	-4.33542	0.000338278	0.00861794	-0.0381734	RNF24	ring finger protein 24	Golgi membrane /// protein binding /// Golgi apparatus /// zinc ion binding /// membrane /// integral to membrane /// metal ion binding
8144281	-0.517105	0.698773	8.42587	-5.43383	2.79004e-05	0.00130019	2.43171	ARHGEF10	Rho guanine nucleotide exchange factor (GEF) 10	guanyl-nucleotide exchange factor activity /// Rho guanyl-nucleotide exchange factor activity /// intracellular /// regulation of Rho protein signal transduction
7931353	-0.522752	0.696043	8.98335	-4.63182	0.000171091	0.00516953	0.634206	PTPRE	protein tyrosine phosphatase, receptor type, E	transmembrane receptor protein tyrosine phosphatase activity /// protein binding /// cytoplasm /// plasma membrane /// protein amino acid phosphorylation /// protein amino acid dephosphorylation /// transmembrane receptor protein tyrosine phosphatase signaling pathway /// integral to membrane /// hydrolase activity /// protein homodimerization activity /// negative regulation of insulin receptor …
8157383	-0.524163	0.695363	8.44399	-4.94515	8.36994e-05	0.00300966	1.34164	COL27A1	collagen, type XXVII, alpha 1	extracellular matrix structural constituent /// extracellular region /// collagen /// cell adhesion
7924166	-0.526267	0.694349	8.7245	-5.68148	1.61384e-05	0.000834411	2.9758	BATF3	basic leucine zipper transcription factor, ATF-like 3	transcription factor activity /// transcription corepressor activity /// nucleus /// regulation of transcription, DNA-dependent /// transcription from RNA polymerase II promoter /// sequence-specific DNA binding /// protein dimerization activity /// transcription factor activity /// nucleus
8110106	-0.527754	0.693634	7.41781	-4.56017	0.000201661	0.00583381	0.471843	HRH2	histamine receptor H2	receptor activity /// G-protein coupled receptor activity /// histamine receptor activity /// plasma membrane /// integral to plasma membrane /// immune response /// signal transduction /// G-protein coupled receptor protein signaling pathway /// G-protein signaling, coupled to cyclic nucleotide second messenger /// histamine receptor activity
7955637	-0.528167	0.693435	11.3668	-4.34345	0.000332072	0.00849884	-0.0199403	KRT18	keratin 18	structural molecule activity /// protein binding /// cytoplasm /// microtubule organizing center /// intermediate filament /// cell cycle /// anatomical structure morphogenesis /// centriolar satellite /// Golgi to plasma membrane CFTR protein transport /// negative regulation of apoptosis /// interspecies interaction between organisms /// keratin filament /// perinuclear region of cytoplasm /// …
8154733	-0.530188	0.692465	11.4728	-4.64641	0.000165466	0.00503003	0.667239	ACO1	aconitase 1, soluble	RNA binding /// RNA binding /// aconitate hydratase activity /// protein binding /// cytoplasm /// endoplasmic reticulum /// Golgi apparatus /// cytosol /// tricarboxylic acid cycle /// citrate metabolic process /// regulation of translation /// cellular iron ion homeostasis /// metabolic process /// post-embryonic development /// response to iron(II) ion /// regulation of gene expression /// lya…
7953844	-0.530373	0.692375	9.0794	-6.07813	6.81578e-06	0.000437274	3.8331	DDX12 /// DDX11 /// LOC642846 /// LOC100134008	DEAD/H (Asp-Glu-Ala-Asp/His) box polypeptide 12 (CHL1-like helicase homolog, S. cerevisiae) /// DEAD/H (Asp-Glu-Ala-Asp/His) box polypeptide 11 (CHL1-like helicase homolog, S. cerevisiae) /// DEAD/H (Asp-Glu-Ala-Asp/His) box polypeptide 11-like /// similar to DEAD/H (Asp-Glu-Ala-Asp/His) box polypeptide 11 (CHL1-like helicase homolog, S. cerevisiae)	mitotic sister chromatid segregation /// S phase of mitotic cell cycle /// G2/M transition of mitotic cell cycle /// nucleotide binding /// DNA binding /// DNA helicase activity /// RNA binding /// ATP-dependent DNA helicase activity /// helicase activity /// ATP binding /// nucleus /// nucleolus /// nucleobase, nucleoside, nucleotide and nucleic acid metabolic process /// cell cycle /// positive…
8041447	-0.530442	0.692342	11.4473	-4.9707	7.89858e-05	0.00287117	1.39907	CRIM1	cysteine rich transmembrane BMP regulator 1 (chordin-like)	regulation of cell growth /// enzyme inhibitor activity /// serine-type endopeptidase inhibitor activity /// insulin-like growth factor receptor activity /// insulin-like growth factor binding /// extracellular region /// plasma membrane /// nervous system development /// integral to membrane /// integral to membrane
7907601	-0.531933	0.691628	6.30359	-5.03071	6.89447e-05	0.00257809	1.53383	FAM5B	family with sequence similarity 5, member B	extracellular region /// cytoplasm /// nervous system development /// negative regulation of cell cycle
7893025	-0.531994	0.691598	9.36747	-4.93562	8.5531e-05	0.00305571	1.32019	---	---	---
7966052	-0.532613	0.691301	8.69824	-5.31101	3.66925e-05	0.00160456	2.15964	CRY1	cryptochrome 1 (photolyase-like)	nucleotide binding /// DNA binding /// DNA photolyase activity /// protein binding /// nucleus /// cytoplasm /// mitochondrion /// DNA repair /// circadian rhythm /// G-protein coupled photoreceptor activity /// protein-chromophore linkage /// regulation of transcription /// response to stimulus /// circadian rhythm
8071314	-0.532673	0.691273	9.47061	-6.29378	4.30069e-06	0.00030813	4.29119	DGCR8	DiGeorge syndrome critical region gene 8	double-stranded RNA binding /// protein binding /// intracellular /// nucleus /// nucleolus /// cytoplasm /// primary microRNA processing /// metal ion binding /// double-stranded RNA binding
8081590	-0.532746	0.691238	10.3023	-5.11012	5.76201e-05	0.00225185	1.71176	PHLDB2	pleckstrin homology-like domain, family B, member 2	cytoplasm /// membrane
8000244	-0.5337	0.690781	9.7303	-4.64008	0.000167883	0.00508181	0.652912	USP31	ubiquitin specific peptidase 31	ubiquitin thiolesterase activity /// ubiquitin-dependent protein catabolic process /// peptidase activity /// cysteine-type peptidase activity
8081548	-0.534747	0.69028	10.742	-5.1165	5.67963e-05	0.0022275	1.72604	PVRL3	poliovirus receptor-related 3	lens morphogenesis in camera-type eye /// protein binding /// plasma membrane /// plasma membrane /// cell-cell adherens junction /// homophilic cell adhesion /// fertilization /// integral to membrane /// protein homodimerization activity /// apical junction complex /// cell adhesion molecule binding /// retina morphogenesis in camera-type eye /// cell adhesion
8107706	-0.535492	0.689923	9.94671	-5.95798	8.83151e-06	0.000530799	3.57537	LMNB1	lamin B1	structural molecule activity /// protein binding /// nucleus /// nuclear envelope /// nuclear inner membrane /// lamin filament /// membrane /// nuclear matrix /// structural molecule activity /// lamin filament
8157283	-0.536603	0.689392	11.2341	-4.58062	0.000192414	0.00564476	0.518192	PRPF4	PRP4 pre-mRNA processing factor 4 homolog (yeast)	RNA splicing, via transesterification reactions /// nuclear mRNA splicing, via spliceosome /// protein binding /// nucleus /// spliceosomal complex /// spliceosomal complex /// RNA processing /// RNA splicing /// RNA splicing /// Cajal body /// nuclear speck /// U4/U6 snRNP /// nuclear mRNA splicing, via spliceosome /// nucleus /// RNA splicing factor activity, transesterification mechanism
8164967	-0.538055	0.688699	8.70907	-4.57716	0.000193947	0.00566977	0.510353	VAV2	vav 2 guanine nucleotide exchange factor	angiogenesis /// guanyl-nucleotide exchange factor activity /// Rho guanyl-nucleotide exchange factor activity /// epidermal growth factor receptor binding /// protein binding /// intracellular /// cytoplasm /// cytosol /// plasma membrane /// apoptosis /// signal transduction /// small GTPase mediated signal transduction /// induction of apoptosis by extracellular signals /// cell migration /// …
7929990	-0.53828	0.688591	9.91474	-5.44581	2.71671e-05	0.00127505	2.45817	PPRC1	peroxisome proliferator-activated receptor gamma, coactivator-related 1	nucleotide binding /// RNA binding /// nucleus /// regulation of transcription
8078650	-0.538555	0.68846	9.3875	-4.26082	0.000401814	0.00988855	-0.207547	CTDSPL	CTD (carboxy-terminal domain, RNA polymerase II, polypeptide A) small phosphatase-like	molecular_function /// phosphoprotein phosphatase activity /// cellular_component /// nucleus /// biological_process /// hydrolase activity /// metal ion binding
8096489	-0.542526	0.686568	9.85442	-4.65237	0.000163221	0.00497235	0.680737	PDLIM5	PDZ and LIM domain 5	actin binding /// protein kinase C binding /// membrane fraction /// cytosol /// zinc ion binding /// actin cytoskeleton /// Z disc /// actinin binding /// metal ion binding /// protein N-terminus binding /// protein binding
8129618	-0.542968	0.686357	6.00414	-4.94634	8.34737e-05	0.00300966	1.34431	VNN1	vanin 1	acute inflammatory response /// chronic inflammatory response /// plasma membrane /// nitrogen compound metabolic process /// anti-apoptosis /// cellular component movement /// inflammatory response /// response to oxidative stress /// pantothenate metabolic process /// integral to membrane /// cell-cell adhesion /// pantetheine hydrolase activity /// anchored to membrane /// positive regulation …
8029521	-0.544164	0.685789	9.55746	-4.36555	0.000315581	0.0081901	0.0302216	TOMM40	translocase of outer mitochondrial membrane 40 homolog (yeast)	integral to membrane of membrane fraction /// mitochondrion /// mitochondrial outer membrane translocase complex /// protein targeting to mitochondrion /// anion transport /// voltage-gated anion channel activity /// protein transmembrane transporter activity /// protein transmembrane transporter activity /// protein transport /// membrane /// integral to mitochondrial outer membrane /// pore com…
7894583	-0.545076	0.685355	9.68778	-4.44148	0.00026494	0.00714886	0.202587	---	---	---
7937915	-0.54509	0.685349	11.5673	-5.4453	2.71978e-05	0.00127505	2.45704	RRM1	ribonucleotide reductase M1	ribonucleoside-diphosphate reductase activity /// protein binding /// ATP binding /// cytoplasm /// cytosol /// ribonucleoside-diphosphate reductase complex /// DNA replication /// deoxyribonucleotide biosynthetic process /// oxidoreductase activity /// class I ribonucleotide reductase activity /// purine nucleotide binding /// protein oligomerization /// oxidation reduction /// deoxyribonucleoti…
7898263	-0.545234	0.68528	8.05132	-4.69936	0.000146571	0.00457822	0.787091	FBLIM1	filamin binding LIM protein 1	protein binding /// cytoplasm /// cytosol /// cytoskeleton /// focal adhesion /// cell cortex /// cell adhesion /// zinc ion binding /// regulation of cell shape /// cell junction /// metal ion binding
8137865	-0.547507	0.684201	10.4796	-6.33064	3.97752e-06	0.000290438	4.36891	GNA12	guanine nucleotide binding protein (G protein) alpha 12	nucleotide binding /// in utero embryonic development /// GTPase activity /// signal transducer activity /// protein binding /// GTP binding /// plasma membrane /// brush border /// signal transduction /// G-protein coupled receptor protein signaling pathway /// intracellular protein kinase cascade /// Rho protein signal transduction /// blood coagulation /// regulation of cell shape /// guanyl n…
8074806	-0.548128	0.683907	9.04403	-4.74472	0.00013213	0.00421817	0.889662	PPM1F /// PPM1F	protein phosphatase 1F (PP2C domain containing) /// protein phosphatase, Mg2+/Mn2+ dependent, 1F	protein serine/threonine phosphatase activity /// protein amino acid dephosphorylation /// apoptosis /// protein serine/threonine phosphatase complex /// hydrolase activity /// metal ion binding /// magnesium ion binding /// manganese ion binding
8046815	-0.548893	0.683544	7.24246	-4.55708	0.000203099	0.00586491	0.464827	ZNF804A	zinc finger protein 804A	intracellular /// zinc ion binding /// metal ion binding
8093539	-0.549295	0.683354	8.99462	-5.9106	9.78644e-06	0.00056869	3.47324	WHSC1	Wolf-Hirschhorn syndrome candidate 1	DNA binding /// protein binding /// nucleus /// cytoplasm /// methyltransferase activity /// zinc ion binding /// anatomical structure morphogenesis /// chromatin modification /// transferase activity /// histone-lysine N-methyltransferase activity /// regulation of transcription /// metal ion binding /// nucleus
8111629	-0.553037	0.681584	12.0296	-4.73581	0.000134849	0.00428441	0.86952	NUP155	nucleoporin 155kDa	transporter activity /// protein binding /// nucleus /// nuclear envelope /// nuclear pore /// nucleocytoplasmic transport /// protein transport /// membrane /// structural constituent of nuclear pore /// nuclear membrane /// mRNA transport /// transmembrane transport /// intracellular protein transmembrane transport
8080487	-0.553706	0.681268	9.67196	-5.54974	2.15756e-05	0.00104571	2.68716	PRKCD	protein kinase C, delta	nucleotide binding /// calcium-independent protein kinase C activity /// protein binding /// ATP binding /// nucleus /// cytoplasm /// cytosol /// plasma membrane /// protein amino acid phosphorylation /// signal transduction /// protein C-terminus binding /// enzyme activator activity /// senescence /// regulation of receptor activity /// immunoglobulin mediated immune response /// transferase a…
8179827	-0.555095	0.680612	12.6208	-4.96574	7.98782e-05	0.00290044	1.38794	CLIC1	chloride intracellular channel 1	voltage-gated ion channel activity /// voltage-gated chloride channel activity /// chloride channel activity /// protein binding /// membrane fraction /// soluble fraction /// nucleus /// nuclear envelope /// cytoplasm /// plasma membrane /// brush border /// transport /// ion transport /// chloride transport /// signal transduction /// integral to membrane /// nuclear membrane /// chloride chann…
7951497	-0.555414	0.680462	9.97652	-4.84187	0.00010586	0.00359308	1.10902	NPAT	nuclear protein, ataxia-telangiectasia locus	regulation of transcription involved in G1/S-phase of mitotic cell cycle /// transcription factor activity /// transcription coactivator activity /// transcription coactivator activity /// transcription corepressor activity /// protein binding /// nucleus /// cell cycle /// protein C-terminus binding /// regulation of gene expression /// Cajal body /// transcription activator activity /// nuclear…
8032009	-0.556448	0.679974	7.98743	-4.41099	0.000284206	0.00755244	0.133392	MIER2	mesoderm induction early response 1, family member 2	---
8076339	-0.560405	0.678112	10.2921	-6.46771	2.97943e-06	0.000227016	4.65633	PHF5A	PHD finger protein 5A	nuclear mRNA splicing, via spliceosome /// transcription factor activity /// nucleus /// spliceosomal complex /// U2 snRNP /// RNA splicing /// nuclear matrix /// regulation of transcription /// positive regulation of transcription, DNA-dependent /// nuclear mRNA splicing, via spliceosome /// RNA splicing
7913644	-0.561597	0.677552	7.21905	-5.61203	1.88034e-05	0.000941497	2.82386	E2F2	E2F transcription factor 2	DNA binding /// transcription factor activity /// RNA polymerase II transcription factor activity /// protein binding /// nucleus /// nucleoplasm /// transcription factor complex /// regulation of transcription, DNA-dependent /// transcription initiation from RNA polymerase II promoter /// apoptosis /// transcription factor binding /// regulation of cell cycle /// transcription factor activity
8166714	-0.56249	0.677132	6.54576	-4.4325	0.000270472	0.00728044	0.182212	LANCL3	LanC lantibiotic synthetase component C-like 3 (bacterial)	catalytic activity
7933008	-0.569215	0.673984	8.03942	-4.75168	0.000130047	0.00417212	0.905381	---	---	---
8114658	-0.573618	0.67193	10.4646	-6.5721	2.39494e-06	0.000189867	4.87354	DIAPH1	diaphanous homolog 1 (Drosophila)	actin binding /// receptor binding /// protein binding /// cytoplasm /// cytoskeleton /// plasma membrane /// sensory perception of sound /// cellular component organization /// actin cytoskeleton organization /// actin filament polymerization /// ruffle membrane /// cell projection /// sensory perception of sound /// Rho GTPase binding
8125059	-0.573629	0.671925	12.4898	-5.29042	3.84226e-05	0.00167455	2.11389	CLIC1	chloride intracellular channel 1	voltage-gated ion channel activity /// voltage-gated chloride channel activity /// chloride channel activity /// protein binding /// membrane fraction /// soluble fraction /// nucleus /// nuclear envelope /// cytoplasm /// plasma membrane /// brush border /// transport /// ion transport /// chloride transport /// signal transduction /// integral to membrane /// nuclear membrane /// chloride chann…
8175369	-0.573691	0.671896	10.4214	-4.58897	0.000188761	0.00555717	0.537122	MAP7D3	MAP7 domain containing 3	---
8155268	-0.574545	0.671498	10.0723	-6.05247	7.2025e-06	0.000459429	3.7782	POLR1E	polymerase (RNA) I polypeptide E, 53kDa	DNA binding /// DNA-directed RNA polymerase activity /// protein binding /// nucleus /// nucleolus /// transcription /// rRNA transcription
8096688	-0.575345	0.671126	9.34506	-4.51352	0.000224479	0.00628634	0.366044	GSTCD	glutathione S-transferase, C-terminal domain containing	protein binding /// cytoplasm /// rRNA processing /// rRNA methyltransferase activity
8045860	-0.575785	0.670921	9.30115	-4.34299	0.000332427	0.00850048	-0.0209934	PKP4	plakophilin 4	protein binding /// cell-cell junction /// cell adhesion /// desmosome /// cell adhesion
8057887	-0.577977	0.669903	10.9785	-4.54525	0.000208694	0.00596982	0.438005	STK17B	serine/threonine kinase 17b	nucleotide binding /// protein serine/threonine kinase activity /// protein binding /// ATP binding /// nucleus /// protein amino acid phosphorylation /// apoptosis /// induction of apoptosis /// intracellular protein kinase cascade /// actin cytoskeleton /// transferase activity /// protein kinase cascade
8125941	-0.579584	0.669157	11.58	-4.51167	0.000225433	0.00630778	0.361855	SRPK1	SFRS protein kinase 1	nucleotide binding /// magnesium ion binding /// protein kinase activity /// protein serine/threonine kinase activity /// protein binding /// ATP binding /// nucleus /// cytoplasm /// protein amino acid phosphorylation /// chromosome segregation /// intracellular protein kinase cascade /// RNA splicing /// transferase activity /// cell differentiation /// interspecies interaction between organism…
8070912	-0.579762	0.669074	9.40318	-6.66976	1.95492e-06	0.000161521	5.07543	SLC19A1	solute carrier family 19 (folate transporter), member 1	folic acid binding /// membrane fraction /// integral to plasma membrane /// transport /// folic acid transporter activity /// reduced folate carrier activity /// methotrexate transporter activity /// folic acid transport /// membrane
7965022	-0.583808	0.6672	11.3348	-5.88227	1.04071e-05	0.000594384	3.41208	GLIPR1 /// KRR1	GLI pathogenesis-related 1 /// KRR1, small subunit (SSU) processome component, homolog (yeast)	extracellular region /// membrane /// integral to membrane /// RNA binding /// nucleus /// nucleolus /// rRNA processing /// ribonucleoprotein complex /// small nucleolar ribonucleoprotein complex
7967021	-0.584158	0.667038	8.76376	-4.78156	0.000121468	0.00398377	0.972895	PXN	paxillin	protein binding /// cytoplasm /// cytoskeleton /// microtubule associated complex /// plasma membrane /// plasma membrane /// focal adhesion /// muscle contraction /// cell adhesion /// cell-matrix adhesion /// signal transduction /// signal complex assembly /// zinc ion binding /// vinculin binding /// lamellipodium /// cell junction /// cellular response to reactive oxygen species /// metal ion…
7974198	-0.584233	0.667004	8.69196	-5.09167	6.00706e-05	0.00231076	1.67045	PPIL5	peptidylprolyl isomerase (cyclophilin)-like 5	protein binding /// modification-dependent protein catabolic process
7908072	-0.584526	0.666869	10.1538	-5.09146	6.0099e-05	0.00231076	1.66998	LAMC2	laminin, gamma 2	protein binding /// extracellular region /// basement membrane /// laminin-2 complex /// extracellular space /// membrane fraction /// soluble fraction /// cell cortex /// cell adhesion /// heparin binding /// epidermis development /// hemidesmosome assembly /// perinuclear region of cytoplasm /// extracellular region
8035868	-0.585396	0.666466	7.38491	-4.77652	0.000122873	0.0039995	0.961517	---	---	---
8053733	-0.585651	0.666349	11.4992	-5.35623	3.31658e-05	0.00149031	2.25999	SETD8	SET domain containing (lysine methyltransferase) 8	transcription corepressor activity /// protein binding /// nucleus /// chromosome /// cell cycle /// mitosis /// methyltransferase activity /// negative regulation of transcription /// transcription repressor activity /// chromatin modification /// transferase activity /// histone-lysine N-methyltransferase activity /// cell division
8114320	-0.586127	0.666129	10.3482	-5.86923	1.07064e-05	0.000603199	3.38388	HNRNPA0	heterogeneous nuclear ribonucleoprotein A0	nucleotide binding /// RNA binding /// nucleus /// mRNA processing /// RNA splicing /// heterogeneous nuclear ribonucleoprotein complex /// nuclear mRNA splicing, via spliceosome /// RNA binding /// nucleus
8027566	-0.58661	0.665906	9.41116	-4.84567	0.000104948	0.00357673	1.11758	CEBPG	CCAAT/enhancer binding protein (C/EBP), gamma	liver development /// DNA binding /// double-stranded DNA binding /// transcription factor activity /// protein binding /// nucleus /// nucleus /// nucleolus /// regulation of transcription from RNA polymerase II promoter /// immune response /// transcription factor binding /// mRNA metabolic process /// B cell differentiation /// natural killer cell mediated cytotoxicity /// enucleate erythrocyt…
7997839	-0.587119	0.665671	8.54161	-4.86027	0.000101517	0.00349556	1.15049	CDT1	chromatin licensing and DNA replication factor 1	DNA replication checkpoint /// DNA binding /// protein binding /// nucleus /// nucleoplasm /// DNA replication /// cell cycle /// regulation of S phase of mitotic cell cycle /// regulation of DNA-dependent DNA replication initiation /// regulation of DNA replication initiation
8007363	-0.587137	0.665663	8.55522	-4.38838	0.000299401	0.00786211	0.0820675	WNK4	WNK lysine deficient protein kinase 4	nucleotide binding /// protein serine/threonine kinase activity /// protein binding /// ATP binding /// cytoplasm /// tight junction /// protein amino acid phosphorylation /// ion transport /// chloride transport /// intracellular protein kinase cascade /// protein localization /// transferase activity /// cell junction /// regulation of cellular process /// protein kinase cascade
8045697	-0.588582	0.664996	10.4877	-5.14774	5.29353e-05	0.00211849	1.79588	RIF1	RAP1 interacting factor homolog (yeast)	chromosome, telomeric region /// binding /// nucleus /// chromosome /// cytoplasm /// spindle /// cytoskeleton /// response to DNA damage stimulus /// cell cycle /// female pronucleus /// male pronucleus /// stem cell maintenance
7948332	-0.588821	0.664886	9.37602	-6.13346	6.05285e-06	0.000403084	3.9512	LPXN	leupaxin	cytoplasm /// protein complex assembly /// cell adhesion /// signal transduction /// zinc ion binding /// metal ion binding
8103431	-0.588908	0.664846	9.38952	-5.19568	4.75219e-05	0.00195834	1.90292	C4orf46	chromosome 4 open reading frame 46	---
8018864	-0.589401	0.664619	8.01442	-5.59162	1.96691e-05	0.000971692	2.77911	SOCS3	suppressor of cytokine signaling 3	response to hypoxia /// regulation of protein amino acid phosphorylation /// protein kinase inhibitor activity /// protein binding /// cytoplasm /// anti-apoptosis /// JAK-STAT cascade /// aging /// response to heat /// response to bacterium /// response to gamma radiation /// response to organic cyclic substance /// organ regeneration /// response to food /// response to estradiol stimulus /// r…
8099612	-0.589726	0.664469	9.11149	-5.3373	3.4598e-05	0.0015332	2.218	GPR125	G protein-coupled receptor 125	G-protein coupled receptor activity /// protein binding /// plasma membrane /// signal transduction /// G-protein coupled receptor protein signaling pathway /// neuropeptide signaling pathway /// external side of plasma membrane /// integral to membrane /// G-protein coupled receptor activity /// integral to membrane
8164177	-0.589906	0.664386	11.2036	-5.77442	1.31649e-05	0.000711611	3.17829	MAPKAP1	mitogen-activated protein kinase associated protein 1	cellular_component /// nucleus /// cytosol /// plasma membrane /// response to stress /// biological_process /// cytoplasmic membrane-bounded vesicle /// Ras GTPase binding /// cytoplasmic vesicle
7953150	-0.590664	0.664037	9.18916	-4.31797	0.000352172	0.00885003	-0.0777991	TEAD4	TEA domain family member 4	skeletal system development /// in utero embryonic development /// cell fate specification /// blastocyst formation /// trophectodermal cell fate commitment /// transcription factor activity /// RNA polymerase II transcription factor activity /// nucleus /// transcription factor complex /// regulation of transcription from RNA polymerase II promoter /// muscle organ development /// embryo implant…
8060205	-0.592413	0.663233	8.09281	-5.17167	5.01588e-05	0.00203924	1.84933	PASK	PAS domain containing serine/threonine kinase	nucleotide binding /// protein serine/threonine kinase activity /// signal transducer activity /// protein binding /// ATP binding /// cytoplasm /// Golgi apparatus /// regulation of transcription, DNA-dependent /// protein amino acid phosphorylation /// signal transduction /// transferase activity /// identical protein binding /// cytoplasm
8133114	-0.593037	0.662946	10.3483	-4.2796	0.000384775	0.00954684	-0.164925	VKORC1L1	vitamin K epoxide reductase complex, subunit 1-like 1	membrane /// integral to membrane
8046646	-0.593899	0.66255	9.34673	-4.75483	0.000129113	0.00415492	0.912516	OSBPL6	oxysterol binding protein-like 6	lipid transport /// steroid metabolic process
8109773	-0.595819	0.661669	8.79238	-6.41573	3.32349e-06	0.000248679	4.54762	WWC1	WW and C2 domain containing 1	transcription coactivator activity /// protein binding /// nucleus /// cytoplasm /// cell migration /// ruffle membrane /// regulation of hippo signaling pathway /// positive regulation of MAPKKK cascade /// perinuclear region of cytoplasm /// protein binding /// cytoplasm
7954604	-0.596207	0.661491	9.70477	-6.39059	3.50429e-06	0.000261034	4.49492	KLHDC5	kelch domain containing 5	protein binding
8178598	-0.596603	0.661309	12.6197	-5.31067	3.67203e-05	0.00160456	2.15888	CLIC1	chloride intracellular channel 1	voltage-gated ion channel activity /// voltage-gated chloride channel activity /// chloride channel activity /// protein binding /// membrane fraction /// soluble fraction /// nucleus /// nuclear envelope /// cytoplasm /// plasma membrane /// brush border /// transport /// ion transport /// chloride transport /// signal transduction /// integral to membrane /// nuclear membrane /// chloride chann…
8047243	-0.597793	0.660764	8.23995	-6.13182	6.07416e-06	0.000403696	3.9477	MARS2	methionyl-tRNA synthetase 2, mitochondrial	nucleotide binding /// methionine-tRNA ligase activity /// methionine-tRNA ligase activity /// ATP binding /// cytoplasm /// mitochondrion /// mitochondrial matrix /// mitochondrial matrix /// methionyl-tRNA aminoacylation /// ligase activity
8020973	-0.59927	0.660088	8.63255	-6.44024	3.15647e-06	0.000237248	4.59891	FHOD3	formin homology 2 domain containing 3	actin binding /// binding /// cytoplasm /// cytoskeleton /// cellular component organization /// actin cytoskeleton organization
8064904	-0.60113	0.659237	9.42617	-5.12349	5.59091e-05	0.00221619	1.74166	FERMT1	fermitin family homolog 1 (Drosophila)	protein binding /// cytoplasm /// cytosol /// cytoskeleton /// plasma membrane /// focal adhesion /// cell adhesion /// cell junction /// filamentous actin /// ruffle membrane /// cell projection /// keratinocyte proliferation /// keratinocyte migration /// establishment of epithelial cell polarity /// cell adhesion /// cell junction
8009761	-0.602375	0.658669	9.96215	-4.38659	0.000300642	0.00787606	0.0779934	NUP85	nucleoporin 85kDa	kinetochore /// condensed chromosome kinetochore /// protein binding /// protein binding /// nucleus /// nuclear envelope /// cytoplasm /// spindle /// cytoskeleton /// chemotaxis /// protein transport /// membrane /// lamellipodium assembly /// Nup107-160 complex /// Nup107-160 complex /// nuclear membrane /// macrophage chemotaxis /// mRNA transport /// transmembrane transport /// intracellular…
7972180	-0.603977	0.657938	8.99851	-4.60962	0.000180025	0.00536643	0.583921	RNF219	ring finger protein 219	protein binding /// zinc ion binding /// metal ion binding
7951004	-0.604734	0.657593	8.43549	-4.7737	0.000123667	0.00402122	0.95515	C11orf75	chromosome 11 open reading frame 75	molecular_function /// cellular_component /// biological_process /// membrane /// integral to membrane
7987772	-0.605192	0.657384	9.86924	-4.46309	0.000252083	0.00688564	0.251637	EHD4	EH-domain containing 4	nucleotide binding /// nucleic acid binding /// GTPase activity /// calcium ion binding /// protein binding /// ATP binding /// GTP binding /// nucleus /// endosome /// endoplasmic reticulum /// pinocytosis /// membrane /// regulation of endocytosis /// early endosome membrane /// recycling endosome membrane
7909967	-0.605334	0.657319	12.2174	-6.23014	4.92363e-06	0.000342259	4.15662	CAPN2	calpain 2, (m/II) large subunit	response to hypoxia /// blastocyst development /// calcium-dependent cysteine-type endopeptidase activity /// calcium ion binding /// protein binding /// intracellular /// soluble fraction /// insoluble fraction /// cytoplasm /// plasma membrane /// proteolysis /// myoblast fusion /// cytoskeletal protein binding /// peptidase activity /// cysteine-type peptidase activity
8098556	-0.60657	0.656756	8.79849	-4.60903	0.000180271	0.00536879	0.582572	CCDC111 /// MLF1IP	coiled-coil domain containing 111 /// MLF1 interacting protein	condensed chromosome kinetochore /// protein binding /// nucleus /// chromosome /// cytoplasm /// interspecies interaction between organisms /// regulation of transcription /// DNA primase activity /// DNA replication /// DNA replication, synthesis of RNA primer
7923233	-0.60922	0.655551	7.68215	-5.05691	6.49775e-05	0.00247263	1.59259	KIF21B	kinesin family member 21B	nucleotide binding /// microtubule motor activity /// ATP binding /// cytoplasm /// microtubule /// microtubule-based movement
7936346	-0.60938	0.655478	10.0659	-4.66372	0.000159031	0.00488041	0.706442	ZDHHC6	zinc finger, DHHC-type containing 6	zinc ion binding /// acyltransferase activity /// membrane /// integral to membrane /// transferase activity /// metal ion binding
7992775	-0.610785	0.65484	9.6801	-5.25251	4.18293e-05	0.00176975	2.02956	PAQR4 /// PKMYT1	progestin and adipoQ receptor family member IV /// protein kinase, membrane associated tyrosine/threonine 1	regulation of cyclin-dependent protein kinase activity /// Golgi membrane /// nucleotide binding /// protein kinase activity /// protein serine/threonine kinase activity /// protein binding /// ATP binding /// membrane fraction /// nucleoplasm /// endoplasmic reticulum /// endoplasmic reticulum membrane /// Golgi apparatus /// protein amino acid phosphorylation /// cell cycle /// mitosis /// regu…
8023377	-0.610813	0.654828	10.5422	-5.02986	6.90777e-05	0.00257856	1.53192	MEX3C	mex-3 homolog C (C. elegans)	RNA binding /// protein binding /// nucleus /// cytoplasm /// zinc ion binding /// metal ion binding
8091648	-0.611995	0.654291	12.0266	-4.63497	0.000169862	0.00513704	0.641332	SSR3	signal sequence receptor, gamma (translocon-associated protein gamma)	signal sequence binding /// protein binding /// endoplasmic reticulum /// Sec61 translocon complex /// endoplasmic reticulum membrane /// microsome /// cotranslational protein targeting to membrane /// membrane /// integral to membrane /// integral to endoplasmic reticulum membrane /// translocon complex
8141950	-0.612253	0.654174	6.50081	-7.6552	2.7078e-07	3.52194e-05	7.03855	RELN	reelin	cell morphogenesis involved in differentiation /// neuron migration /// protein serine/threonine/tyrosine kinase activity /// protein binding /// extracellular region /// proteinaceous extracellular matrix /// extracellular space /// cytoplasm /// cell adhesion /// multicellular organismal development /// axon guidance /// central nervous system development /// brain development /// locomotory be…
7926916	-0.616868	0.652085	9.95812	-4.27665	0.0003874	0.00959767	-0.171614	ZEB1	zinc finger E-box binding homeobox 1	negative regulation of transcription from RNA polymerase II promoter /// chromatin binding /// double-stranded DNA binding /// transcription factor activity /// transcription coactivator activity /// transcription corepressor activity /// intracellular /// nucleus /// transcription factor complex /// regulation of transcription from RNA polymerase II promoter /// immune response /// pattern speci…
8021418	-0.617347	0.651868	9.00204	-5.82078	1.18976e-05	0.000655885	3.27895	MALT1	mucosa associated lymphoid tissue lymphoma translocation gene 1	B-1 B cell differentiation /// response to molecule of bacterial origin /// positive regulation of T cell cytokine production /// cysteine-type endopeptidase activity /// ubiquitin-protein ligase activity /// signal transducer activity /// protein binding /// nucleus /// cytoplasm /// cytosol /// proteolysis /// anti-apoptosis /// defense response /// activation of NF-kappaB-inducing kinase activ…
8040578	-0.617477	0.65181	9.96859	-4.69161	0.000149194	0.00462312	0.769559	CENPO /// ADCY3	centromere protein O /// adenylate cyclase 3	nucleotide binding /// adenylate cyclase activity /// calmodulin binding /// ATP binding /// cytoplasm /// plasma membrane /// plasma membrane /// integral to plasma membrane /// cAMP biosynthetic process /// female meiosis /// signal transduction /// activation of adenylate cyclase activity by G-protein signaling pathway /// inhibition of adenylate cyclase activity by G-protein signaling pathway…
7975760	-0.618739	0.65124	10.9655	-6.60907	2.21744e-06	0.000179044	4.95012	EIF2B2	eukaryotic translation initiation factor 2B, subunit 2 beta, 39kDa	ovarian follicle development /// translation initiation factor activity /// guanyl-nucleotide exchange factor activity /// guanyl-nucleotide exchange factor activity /// protein binding /// ATP binding /// GTP binding /// cytoplasm /// eukaryotic translation initiation factor 2B complex /// translational initiation /// regulation of translational initiation /// central nervous system development …
8093130	-0.618863	0.651184	9.40712	-4.66458	0.00015872	0.00487536	0.708376	RNF168	ring finger protein 168	ubiquitin ligase complex /// chromatin binding /// ubiquitin-protein ligase activity /// protein binding /// nucleus /// chromosome /// double-strand break repair /// zinc ion binding /// response to ionizing radiation /// chromatin modification /// ligase activity /// histone binding /// ubiquitin binding /// positive regulation of DNA repair /// metal ion binding /// histone H2A K63-linked ubiq…
7953218	-0.622188	0.649685	9.42756	-4.54548	0.000208583	0.00596982	0.438527	RAD51AP1	RAD51 associated protein 1	double-strand break repair via homologous recombination /// DNA binding /// double-stranded DNA binding /// single-stranded DNA binding /// RNA binding /// protein binding /// nucleus /// DNA repair /// response to DNA damage stimulus
8089372	-0.622731	0.649441	10.6968	-4.43714	0.000267598	0.00721475	0.192742	KIAA1524	KIAA1524	protein binding /// cytoplasm /// membrane /// integral to membrane /// cytoplasm
8149811	-0.623549	0.649072	8.77055	-5.82365	1.18234e-05	0.00065505	3.28517	NKX3-1	NK3 homeobox 1	somitogenesis /// transcription factor activity /// protein binding /// nucleus /// regulation of transcription, DNA-dependent /// multicellular organismal development /// salivary gland development /// heart development /// transcription factor binding /// transcription activator activity /// prostate gland development /// sequence-specific DNA binding /// branching morphogenesis of a tube /// n…
7940153	-0.623816	0.648952	10.7538	-6.74496	1.67345e-06	0.000141783	5.23002	FAM111A	family with sequence similarity 111, member A	catalytic activity /// serine-type endopeptidase activity /// proteolysis
8020493	-0.623933	0.6489	5.44623	-4.66571	0.000158307	0.00487168	0.710949	---	---	---
8079462	-0.624294	0.648737	9.28258	-4.38769	0.000299878	0.00786635	0.0804993	NBEAL2	neurobeachin-like 2	binding
7959574	-0.624553	0.648621	11.1681	-6.51931	2.6741e-06	0.000207551	4.76387	SETD8	SET domain containing (lysine methyltransferase) 8	transcription corepressor activity /// protein binding /// nucleus /// chromosome /// cell cycle /// mitosis /// methyltransferase activity /// negative regulation of transcription /// transcription repressor activity /// chromatin modification /// transferase activity /// histone-lysine N-methyltransferase activity /// cell division
8102362	-0.625027	0.648408	8.07606	-4.39269	0.000296445	0.00779679	0.0918437	TIFA	TRAF-interacting protein with forkhead-associated domain	protein binding /// I-kappaB kinase/NF-kappaB cascade
8029437	-0.625809	0.648056	10.2316	-6.99984	9.93651e-07	9.52357e-05	5.74815	PVR	poliovirus receptor	viral receptor activity /// positive regulation of natural killer cell mediated cytotoxicity directed against tumor cell target /// receptor activity /// protein binding /// extracellular region /// extracellular space /// cytoplasm /// plasma membrane /// cell surface /// integral to membrane /// cell-cell adhesion /// cell migration /// susceptibility to natural killer cell mediated cytotoxicit…
7992293	-0.626422	0.647781	10.5939	-6.19993	5.25117e-06	0.000361257	4.09255	TMEM204	transmembrane protein 204	plasma membrane /// adherens junction /// response to stress /// integral to membrane /// cell junction
7932160	-0.626876	0.647577	8.45455	-5.90609	9.8825e-06	0.000573271	3.46352	FAM107B	family with sequence similarity 107, member B	---
7926158	-0.62778	0.647172	8.53586	-4.93027	8.65759e-05	0.00307837	1.30816	C10orf47	chromosome 10 open reading frame 47	---
7938544	-0.629372	0.646458	10.9636	-5.32337	3.5692e-05	0.00157618	2.18709	TEAD1	TEA domain family member 1 (SV40 transcriptional enhancer factor)	DNA binding /// transcription factor activity /// protein binding /// nucleus /// transcription factor complex /// regulation of transcription, DNA-dependent /// heart development /// transcription activator activity /// positive regulation of transcription from RNA polymerase II promoter
8107194	-0.63001	0.646172	9.47748	-5.14846	5.28498e-05	0.00211849	1.79748	C5orf30	chromosome 5 open reading frame 30	---
8160284	-0.630377	0.646008	10.2268	-4.72971	0.000136744	0.00431988	0.85572	HAUS6	HAUS augmin-like complex, subunit 6	molecular_function /// cytoplasm /// microtubule organizing center /// spindle /// cytoskeleton /// microtubule /// cell cycle /// mitosis /// spindle assembly /// centrosome organization /// cell division /// HAUS complex /// centrosome
7918622	-0.63222	0.645183	10.5284	-4.46927	0.000248526	0.0068185	0.265651	SLC16A1	solute carrier family 16, member 1 (monocarboxylic acid transporter 1)	protein binding /// membrane fraction /// plasma membrane /// plasma membrane /// pyruvate metabolic process /// monocarboxylic acid transmembrane transporter activity /// mevalonate transmembrane transporter activity /// symporter activity /// secondary active monocarboxylate transmembrane transporter activity /// organic anion transport /// monocarboxylic acid transport /// mevalonate transport…
7967876	-0.633276	0.644711	9.86549	-4.31855	0.000351702	0.00884489	-0.0764841	RP11-408E5.4 /// LOC645739	hCG1646718 /// hCG1646718	---
8013015	-0.634076	0.644354	9.45284	-7.04284	9.10791e-07	8.89343e-05	5.83466	CENPV	centromere protein V	kinetochore /// condensed chromosome kinetochore /// molecular_function /// nucleus /// cytoplasm /// cytoskeleton /// cell cycle /// mitosis /// metabolic process /// carbon-sulfur lyase activity /// centromeric heterochromatin formation /// positive regulation of cytokinesis /// regulation of chromosome organization /// centromere complex assembly /// spindle midzone /// cell division
7980636	-0.634323	0.644243	6.73001	-5.49832	2.41776e-05	0.00115006	2.574	EML5	echinoderm microtubule associated protein like 5	cytoplasm /// microtubule
8140151	-0.637377	0.642881	11.3113	-5.63957	1.76966e-05	0.000895506	2.88416	RFC2	replication factor C (activator 1) 2, 40kDa	nucleotide binding /// DNA clamp loader activity /// protein binding /// ATP binding /// nucleus /// nucleoplasm /// DNA replication factor C complex /// DNA replication /// nucleotide-excision repair, DNA gap filling /// nucleoside-triphosphatase activity /// ATP binding /// DNA replication
8031807	-0.637834	0.642677	8.33871	-5.52053	2.30164e-05	0.00110588	2.62291	ZNF551	zinc finger protein 551	DNA binding /// intracellular /// nucleus /// regulation of transcription, DNA-dependent /// zinc ion binding /// metal ion binding
7925500	-0.638086	0.642565	9.80136	-4.99299	7.50933e-05	0.00275676	1.44915	CHML	choroideremia-like (Rab escort protein 2)	Rab geranylgeranyltransferase activity /// GTPase activator activity /// Rab-protein geranylgeranyltransferase complex /// intracellular protein transport /// visual perception /// regulation of GTPase activity
7896692	-0.640359	0.641553	8.73513	-6.00222	8.02631e-06	0.000494434	3.67047	---	---	---
8151824	-0.642244	0.640716	8.93013	-5.11872	5.65127e-05	0.00222424	1.73101	RAD54B	RAD54 homolog B (S. cerevisiae)	nucleotide binding /// double-strand break repair via homologous recombination /// double-strand break repair via homologous recombination /// DNA binding /// DNA helicase activity /// RNA helicase activity /// protein binding /// ATP binding /// nucleus /// nucleus /// cytoplasm /// DNA repair /// mitotic recombination /// response to DNA damage stimulus /// reciprocal meiotic recombination /// …
8138542	-0.643791	0.640029	6.11842	-4.28924	0.000376304	0.00935768	-0.143022	IL6	interleukin 6 (interferon, beta 2)	neutrophil apoptosis /// hepatic immune response /// hepatic immune response /// neutrophil mediated immunity /// monocyte chemotaxis /// positive regulation of acute inflammatory response /// positive regulation of leukocyte chemotaxis /// cytokine activity /// cytokine activity /// interleukin-6 receptor binding /// interleukin-6 receptor binding /// extracellular region /// extracellular space…
8088602	-0.644966	0.639508	8.57664	-4.51509	0.000223667	0.00627418	0.369616	MAGI1	membrane associated guanylate kinase, WW and PDZ domain containing 1	nucleotide binding /// protein binding /// ATP binding /// plasma membrane /// cell-cell junction /// tight junction /// protein complex assembly /// cell adhesion /// cell surface receptor linked signaling pathway /// protein C-terminus binding /// plasma membrane /// cell surface receptor linked signal transduction
7993664	-0.647154	0.638539	9.55569	-4.46379	0.000251679	0.00688026	0.253217	CP110	CP110 protein	protein binding /// cytoplasm /// centrosome /// centriole /// cytosol /// cytoskeleton /// centriole replication /// regulation of cytokinesis /// centrosome duplication
8088264	-0.647873	0.638221	7.58298	-6.83414	1.39308e-06	0.000124692	5.41232	IL17RD	interleukin 17 receptor D	Golgi membrane /// receptor activity /// cytoplasm /// Golgi apparatus /// plasma membrane /// integral to membrane
8091411	-0.649121	0.637669	12.8301	-8.94976	2.45503e-08	5.00742e-06	9.4096	TM4SF1	transmembrane 4 L six family member 1	molecular_function /// integral to plasma membrane /// biological_process /// membrane
8097717	-0.649444	0.637526	8.55545	-7.56365	3.23581e-07	4.05556e-05	6.86193	ARHGAP10	Rho GTPase activating protein 10	GTPase activator activity /// Rho GTPase activator activity /// protein binding /// intracellular /// cytoplasm /// plasma membrane /// cytoskeleton organization /// signal transduction /// perinuclear region of cytoplasm
7976012	-0.649599	0.637457	6.59015	-4.82487	0.000110043	0.0036903	1.07066	NRXN3	neurexin 3	receptor activity /// calcium channel regulator activity /// protein binding /// integral to plasma membrane /// cell adhesion /// synaptic transmission /// neurotransmitter secretion /// axon guidance /// synapse assembly /// membrane /// integral to membrane /// metal ion binding /// calcium ion binding
8156826	-0.651082	0.636803	9.94293	-4.531	0.000215637	0.00610032	0.405698	TGFBR1	transforming growth factor, beta receptor 1	nucleotide binding /// activation of MAPKK activity /// skeletal system development /// response to hypoxia /// in utero embryonic development /// kidney development /// blastocyst development /// protein serine/threonine kinase activity /// transmembrane receptor protein serine/threonine kinase activity /// receptor activity /// transforming growth factor beta receptor activity /// transforming …
8043187	-0.653444	0.635761	12.5411	-4.43212	0.00027071	0.00728096	0.181346	MAT2A	methionine adenosyltransferase II, alpha	nucleotide binding /// methionine adenosyltransferase activity /// protein binding /// ATP binding /// S-adenosylmethionine biosynthetic process /// one-carbon metabolic process /// circadian rhythm /// response to light stimulus /// response to hormone stimulus /// transferase activity /// response to drug /// metal ion binding /// response to cAMP /// magnesium ion binding /// methionine adenos…
8023656	-0.653636	0.635676	10.8129	-6.72633	1.73904e-06	0.000146594	5.19179	KDSR	3-ketodihydrosphingosine reductase	binding /// extracellular space /// endoplasmic reticulum /// endoplasmic reticulum membrane /// 3-keto-sphinganine metabolic process /// membrane /// integral to membrane /// oxidoreductase activity /// 3-dehydrosphinganine reductase activity /// 3-dehydrosphinganine reductase activity /// oxidation reduction /// endoplasmic reticulum /// 3-dehydrosphinganine reductase activity
7945014	-0.655619	0.634803	10.574	-4.83444	0.000107668	0.00363592	1.09225	CHEK1	CHK1 checkpoint homolog (S. pombe)	DNA damage checkpoint /// regulation of cyclin-dependent protein kinase activity /// nucleotide binding /// chromosome, telomeric region /// condensed nuclear chromosome /// protein kinase activity /// protein serine/threonine kinase activity /// protein binding /// ATP binding /// nucleus /// nucleoplasm /// cytoplasm /// microtubule organizing center /// cytoskeleton /// DNA replication /// DNA…
8061471	-0.655675	0.634778	11.4023	-4.35657	0.000322182	0.0083136	0.00983114	GINS1	GINS complex subunit 1 (Psf1 homolog)	inner cell mass cell proliferation /// protein binding /// nucleus /// cytoplasm /// DNA replication
8149733	-0.657909	0.633796	10.8096	-4.75428	0.000129276	0.00415492	0.911267	TNFRSF10B	tumor necrosis factor receptor superfamily, member 10b	receptor activity /// protein binding /// protein binding /// plasma membrane /// apoptosis /// activation of caspase activity /// signal transduction /// cell surface receptor linked signaling pathway /// activation of NF-kappaB-inducing kinase activity /// induction of apoptosis via death domain receptors /// activation of pro-apoptotic gene products /// caspase activator activity /// integral …
8064191	-0.658856	0.63338	11.0596	-5.58409	1.99988e-05	0.000985058	2.76259	TPD52L2	tumor protein D52-like 2	protein binding
8092520	-0.659538	0.633081	8.27291	-5.56967	2.06458e-05	0.00101095	2.73094	C3orf70	chromosome 3 open reading frame 70	---
7894400	-0.664088	0.631088	8.84764	-4.50673	0.000228009	0.00634254	0.350646	---	---	---
8171802	-0.667883	0.629429	10.8561	-5.95804	8.83039e-06	0.000530799	3.57549	ACOT9	acyl-CoA thioesterase 9	acetyl-CoA hydrolase activity /// carboxylesterase activity /// mitochondrion /// acyl-CoA metabolic process /// hydrolase activity
8092849	-0.668157	0.62931	11.9362	-4.69776	0.00014711	0.00458643	0.783466	ATP13A3	ATPase type 13A3	nucleotide binding /// ATP binding /// ATP biosynthetic process /// cation transport /// metabolic process /// ATPase activity, coupled to transmembrane movement of ions, phosphorylative mechanism /// membrane /// integral to membrane /// hydrolase activity /// hydrolase activity, acting on acid anhydrides, catalyzing transmembrane movement of substances /// ATPase activity /// metal ion binding …
8040223	-0.668561	0.629134	10.7402	-6.14036	5.96412e-06	0.000397971	3.96589	RRM2	ribonucleotide reductase M2	ribonucleoside-diphosphate reductase activity /// protein binding /// cytoplasm /// cytosol /// DNA replication /// deoxyribonucleoside diphosphate metabolic process /// deoxyribonucleotide biosynthetic process /// oxidoreductase activity /// class I ribonucleotide reductase activity /// transition metal ion binding /// protein oligomerization /// oxidation reduction /// iron ion binding /// deox…
7914141	-0.668916	0.628979	8.44498	-5.9847	8.33586e-06	0.000504653	3.63282	RPA2	replication protein A2, 32kDa	nucleotide-excision repair, DNA damage removal /// nucleic acid binding /// single-stranded DNA binding /// protein binding /// nucleus /// nucleoplasm /// DNA replication factor A complex /// DNA replication /// DNA-dependent DNA replication /// nucleotide-excision repair, DNA gap filling
8165622	-0.669198	0.628856	9.20026	-4.75564	0.000128875	0.00415405	0.914342	ZMYND19	zinc finger, MYND-type containing 19	cytoplasm /// plasma membrane /// zinc ion binding /// synaptosome /// metal ion binding
8058849	-0.67265	0.627353	10.3686	-4.72985	0.0001367	0.00431988	0.856037	2011-03-04	membrane-associated ring finger (C3HC4) 4	Golgi membrane /// Golgi apparatus /// zinc ion binding /// membrane /// integral to membrane /// ligase activity /// metal ion binding /// modification-dependent protein catabolic process
8171561	-0.673383	0.627035	8.60817	-4.27388	0.000389888	0.00964496	-0.177912	SCML2	sex comb on midleg-like 2 (Drosophila)	DNA binding /// transcription factor activity /// nucleus /// anatomical structure morphogenesis /// regulation of transcription
7970082	-0.673648	0.626919	7.08804	-4.60232	0.000183067	0.00542383	0.567372	---	---	---
8131944	-0.67504	0.626315	9.98583	-6.08941	6.65269e-06	0.000433076	3.85719	NFE2L3	nuclear factor (erythroid-derived 2)-like 3	transcription factor activity /// transcription coactivator activity /// nucleus /// regulation of transcription, DNA-dependent /// transcription from RNA polymerase II promoter /// sequence-specific DNA binding /// protein dimerization activity /// transcription factor activity
7922391	-0.6761	0.625855	8.62875	-6.15457	5.78553e-06	0.000387607	3.99614	CENPL	centromere protein L	chromosome, centromeric region /// nucleus /// chromosome
8080911	-0.677844	0.625099	7.25174	-4.5444	0.000209098	0.00597624	0.436095	KBTBD8	kelch repeat and BTB (POZ) domain containing 8	protein binding
8105267	-0.67852	0.624806	12.3554	-5.62276	1.83639e-05	0.000923661	2.84736	ITGA2	integrin, alpha 2 (CD49B, alpha 2 subunit of VLA-2 receptor)	response to hypoxia /// tissue homeostasis /// positive regulation of leukocyte migration /// receptor activity /// integrin binding /// protein binding /// collagen binding /// nucleus /// plasma membrane /// focal adhesion /// cellular component movement /// hypotonic response /// cell adhesion /// cell-matrix adhesion /// integrin-mediated signaling pathway /// blood coagulation /// cell proli…
8102440	-0.679075	0.624565	8.1724	-5.22525	4.44672e-05	0.00186242	1.96885	ARSJ	arylsulfatase family, member J	arylsulfatase activity /// extracellular region /// metabolic process /// hydrolase activity /// metal ion binding /// calcium ion binding
8170971	-0.679575	0.624349	10.8314	-5.08491	6.09933e-05	0.00233974	1.65533	DKC1	dyskeratosis congenita 1, dyskerin	pseudouridine synthesis /// telomerase activity /// RNA binding /// protein binding /// nucleus /// nucleoplasm /// telomerase holoenzyme complex /// nucleolus /// rRNA processing /// RNA processing /// telomere maintenance via telomerase /// cell proliferation /// pseudouridine synthase activity /// Cajal body /// isomerase activity /// RNA binding /// nucleus /// nucleoplasm /// nucleolus /// r…
8117576	-0.67966	0.624312	4.29023	-4.92653	8.73143e-05	0.00309947	1.29975	---	---	---
8057394	-0.681611	0.623469	9.03913	-4.9332	8.60021e-05	0.00306597	1.31475	SESTD1	SEC14 and spectrin domains 1	protein binding
7985829	-0.682899	0.622912	10.5627	-7.36511	4.78011e-07	5.34105e-05	6.47485	FANCI /// POLG	Fanconi anemia, complementation group I /// polymerase (DNA directed), gamma	protease binding /// DNA binding /// DNA-directed DNA polymerase activity /// exonuclease activity /// protein binding /// mitochondrion /// mitochondrial inner membrane /// gamma DNA polymerase complex /// DNA metabolic process /// DNA-dependent DNA replication /// mitochondrial DNA replication /// base-excision repair, gap-filling /// aging /// transferase activity /// nucleotidyltransferase ac…
7898549	-0.683301	0.622739	9.4667	-4.32826	0.00034391	0.00872802	-0.054428	MRTO4	mRNA turnover 4 homolog (S. cerevisiae)	intracellular /// nucleus /// nucleolus /// ribosome biogenesis
8084206	-0.684342	0.62229	10.4773	-5.50281	2.39381e-05	0.00114521	2.58389	B3GNT5	UDP-GlcNAc:betaGal beta-1,3-N-acetylglucosaminyltransferase 5	Golgi membrane /// intracellular /// Golgi apparatus /// protein amino acid glycosylation /// multicellular organismal development /// central nervous system development /// galactosyltransferase activity /// beta-galactosyl-N-acetylglucosaminylgalactosylglucosyl-ceramide beta-1,3-acetylglucosaminyltransferase activity /// lipopolysaccharide N-acetylglucosaminyltransferase activity /// glycolipid…
7968734	-0.685888	0.621623	9.58353	-4.7689	0.000125031	0.00405677	0.944296	SLC25A15	solute carrier family 25 (mitochondrial carrier; ornithine transporter) member 15	urea cycle /// L-ornithine transmembrane transporter activity /// mitochondrial ornithine transport /// transporter activity /// binding /// mitochondrion /// mitochondrial inner membrane /// cellular amino acid metabolic process /// membrane /// integral to membrane /// transmembrane transport /// mitochondrial inner membrane /// transport /// integral to membrane
7932744	-0.687426	0.620961	7.55148	-5.78046	1.29922e-05	0.000706165	3.19143	ARMC4	armadillo repeat containing 4	binding
8103932	-0.687519	0.620921	10.2233	-6.25863	4.63405e-06	0.000325171	4.21692	MLF1IP	MLF1 interacting protein	condensed chromosome kinetochore /// protein binding /// nucleus /// chromosome /// cytoplasm /// interspecies interaction between organisms /// regulation of transcription
8101992	-0.688292	0.620588	10.3256	-4.69425	0.000148296	0.00461477	0.775526	SLC39A8	solute carrier family 39 (zinc transporter), member 8	ion transport /// zinc ion transport /// membrane /// integral to membrane /// metal ion transport /// metal ion transmembrane transporter activity /// transmembrane transport /// zinc ion binding
7936798	-0.691567	0.619181	7.10264	-5.47444	2.54931e-05	0.00120574	2.52136	CUZD1	CUB and zona pellucida-like domains 1	protein binding /// substrate-bound cell migration, cell attachment to substrate /// cell cycle /// cell adhesion /// cell proliferation /// hormone-mediated signaling pathway /// membrane /// integral to membrane /// transport vesicle membrane /// cytoplasmic vesicle /// trypsinogen activation /// zymogen granule membrane /// cell division
8034772	-0.693199	0.618481	11.2659	-4.78565	0.00012034	0.00395555	0.982127	ASF1B	ASF1 anti-silencing function 1 homolog B (S. cerevisiae)	chromatin /// protein binding /// nucleus /// chromatin assembly or disassembly /// nucleosome assembly /// multicellular organismal development /// spermatogenesis /// chromatin modification /// cell differentiation /// histone binding /// regulation of transcription
7936408	-0.693293	0.61844	8.71455	-5.04803	6.62947e-05	0.00250513	1.57269	DCLRE1A	DNA cross-link repair 1A (PSO2 homolog, S. cerevisiae)	nucleus /// nucleotide-excision repair /// cell cycle /// mitosis /// hydrolase activity /// cell division /// response to DNA damage stimulus
7994541	-0.695194	0.617626	9.54642	-4.50889	0.000226878	0.00632949	0.355552	LAT /// SPNS1	linker for activation of T cells /// spinster homolog 1 (Drosophila)	immunological synapse /// SH3/SH2 adaptor activity /// protein binding /// plasma membrane /// immune response /// integrin-mediated signaling pathway /// Ras protein signal transduction /// integral to membrane /// calcium-mediated signaling /// mast cell degranulation /// membrane raft /// regulation of T cell activation /// mitochondrion /// mitochondrial inner membrane /// lipid transport ///…
7938485	-0.69531	0.617577	10.8672	-5.77479	1.31542e-05	0.000711611	3.1791	MICAL2	microtubule associated monoxygenase, calponin and LIM domain containing 2	monooxygenase activity /// cytoplasm /// cytoskeleton /// zinc ion binding /// metal ion binding /// oxidation reduction /// metabolic process
8117594	-0.696158	0.617214	13.5448	-4.57355	0.000195563	0.00570197	0.502163	HIST1H2BM	histone cluster 1, H2bm	nucleosome /// DNA binding /// nucleus /// chromosome /// nucleosome assembly
8115562	-0.696915	0.61689	9.97388	-4.47113	0.000247464	0.00679853	0.269873	RNF145	ring finger protein 145	protein binding /// zinc ion binding /// membrane /// integral to membrane /// metal ion binding
8089082	-0.69819	0.616345	12.9534	-7.3435	4.98905e-07	5.51895e-05	6.43239	DCBLD2	discoidin, CUB and LCCL domain containing 2	integral to plasma membrane /// cell adhesion /// cell surface /// membrane /// negative regulation of cell growth /// intracellular receptor mediated signaling pathway /// wound healing /// protein binding /// integral to plasma membrane /// cell surface /// negative regulation of cell growth /// intracellular receptor-mediated signaling pathway /// wound healing
8059905	-0.698262	0.616314	11.0309	-6.24524	4.76786e-06	0.00033352	4.1886	COL6A3	collagen, type VI, alpha 3	serine-type endopeptidase inhibitor activity /// protein binding /// extracellular region /// proteinaceous extracellular matrix /// collagen type VI /// extracellular space /// cell adhesion /// muscle organ development /// peptidase inhibitor activity /// sarcolemma
8132860	-0.699186	0.61592	9.51623	-5.03913	6.76431e-05	0.00254499	1.55273	EGFR	epidermal growth factor receptor (erythroblastic leukemia viral (v-erb-b) oncogene homolog, avian)	nucleotide binding /// activation of MAPKK activity /// cell morphogenesis /// ossification /// double-stranded DNA binding /// MAP/ERK kinase kinase activity /// protein tyrosine kinase activity /// protein tyrosine kinase activity /// protein tyrosine kinase activity /// receptor signaling protein tyrosine kinase activity /// transmembrane receptor activity /// epidermal growth factor receptor …
7967002	-0.699525	0.615775	10.3642	-6.43054	3.22153e-06	0.000241593	4.57861	PXN	paxillin	protein binding /// cytoplasm /// cytoskeleton /// microtubule associated complex /// plasma membrane /// plasma membrane /// focal adhesion /// muscle contraction /// cell adhesion /// cell-matrix adhesion /// signal transduction /// signal complex assembly /// zinc ion binding /// vinculin binding /// lamellipodium /// cell junction /// cellular response to reactive oxygen species /// metal ion…
8043682	-0.702063	0.614693	8.33502	-5.93628	9.25632e-06	0.000544907	3.52863	---	---	---
8050007	-0.703294	0.614168	9.25451	-5.20656	4.63737e-05	0.00191576	1.92719	PXDN	peroxidasin homolog (Drosophila)	peroxidase activity /// interleukin-1 receptor antagonist activity /// extracellular matrix structural constituent /// protein binding /// extracellular region /// proteinaceous extracellular matrix /// extracellular space /// immune response /// response to oxidative stress /// oxidoreductase activity /// heme binding /// extracellular matrix organization /// extracellular matrix /// hydrogen pe…
8068902	-0.703859	0.613928	9.66018	-5.09317	5.98671e-05	0.00230717	1.67382	RRP1B	ribosomal RNA processing 1 homolog B (S. cerevisiae)	protein binding /// nucleus /// nucleolus /// cytosol /// rRNA processing /// preribosome, small subunit precursor
8082238	-0.704375	0.613708	5.35361	-4.46914	0.000248601	0.0068185	0.265354	---	---	---
7969414	-0.704565	0.613627	9.19161	-5.63329	1.7943e-05	0.000906598	2.87041	KLF5	Kruppel-like factor 5 (intestinal)	angiogenesis /// transcription factor activity /// RNA polymerase II transcription factor activity /// protein binding /// intracellular /// nucleus /// regulation of transcription, DNA-dependent /// transcription from RNA polymerase II promoter /// zinc ion binding /// positive regulation of cell proliferation /// microvillus assembly /// positive regulation of transcription /// metal ion binding
7989023	-0.704642	0.613595	9.34331	-6.55794	2.46671e-06	0.000193712	4.84417	RAB27A	RAB27A, member RAS oncogene family	nucleotide binding /// photoreceptor outer segment /// GTPase activity /// protein binding /// GTP binding /// lysosome /// late endosome /// Golgi apparatus /// protein targeting /// exocytosis /// small GTPase mediated signal transduction /// blood coagulation /// protein transport /// membrane /// apical plasma membrane /// melanocyte differentiation /// dendrite /// secretory granule membrane…
7943263	-0.70489	0.613489	9.01641	-5.18391	4.8796e-05	0.00199848	1.87666	AMOTL1	angiomotin like 1	protein binding /// cytoplasm /// tight junction /// cell junction /// identical protein binding
8147661	-0.705868	0.613074	8.24836	-6.30312	4.21632e-06	0.000303876	4.31091	SPAG1	sperm associated antigen 1	nucleotide binding /// GTP binding /// cytoplasm /// single fertilization /// hydrolase activity /// single fertilization
8026564	-0.707048	0.612572	9.19605	-5.43004	2.81365e-05	0.00130664	2.42333	KLF2	Kruppel-like factor 2 (lung)	transcription factor activity /// protein binding /// intracellular /// nucleus /// zinc ion binding /// transcription activator activity /// positive regulation of transcription /// metal ion binding
7950578	-0.707555	0.612357	10.5291	-7.32334	5.19255e-07	5.65021e-05	6.3927	PAK1	p21 protein (Cdc42/Rac)-activated kinase 1	MAPKKK cascade /// nucleotide binding /// protein kinase activity /// protein serine/threonine kinase activity /// protein binding /// collagen binding /// ATP binding /// cytoplasm /// Golgi apparatus /// cytosol /// plasma membrane /// focal adhesion /// protein amino acid phosphorylation /// apoptosis /// ER-nucleus signaling pathway /// cytoskeleton organization /// transferase activity /// c…
8162759	-0.707757	0.612271	9.27078	-4.77884	0.000122224	0.0039899	0.966759	TBC1D2	TBC1 domain family, member 2	GTPase activator activity /// Rab GTPase activator activity /// intracellular /// regulation of Rab GTPase activity
8062603	-0.708411	0.611994	11.6648	-5.96416	8.71434e-06	0.000525655	3.58865	TOP1	topoisomerase (DNA) I	nucleotide binding /// nuclear chromosome /// DNA binding /// chromatin binding /// DNA topoisomerase type I activity /// DNA topoisomerase (ATP-hydrolyzing) activity /// protein binding /// ATP binding /// nucleus /// nucleoplasm /// nucleolus /// cytoplasm /// DNA replication /// DNA topological change /// DNA unwinding involved in replication /// programmed cell death /// phosphorylation /// e…
8006634	-0.711759	0.610575	10.4919	-4.4444	0.000263162	0.00712112	0.209222	PIGW	phosphatidylinositol glycan anchor biosynthesis, class W	endoplasmic reticulum /// endoplasmic reticulum membrane /// O-acyltransferase activity /// membrane /// integral to membrane /// preassembly of GPI anchor in ER membrane /// transferase activity, transferring acyl groups /// endoplasmic reticulum membrane
7984743	-0.711803	0.610557	9.36787	-4.8123	0.000113242	0.00375654	1.04229	CD276	CD276 molecule	receptor binding /// protein binding /// immune response /// cell proliferation /// external side of plasma membrane /// membrane /// integral to membrane /// positive regulation of bone mineralization /// positive regulation of T cell proliferation /// T cell activation /// negative regulation of T cell proliferation /// negative regulation of interferon-gamma biosynthetic process /// positive r…
8134098	-0.711932	0.610502	9.30068	-7.32058	5.22107e-07	5.65524e-05	6.38727	PFTK1 /// CDK14	PFTAIRE protein kinase 1 /// cyclin-dependent kinase 14	G2/M transition of mitotic cell cycle /// nucleotide binding /// cytoplasmic cyclin-dependent protein kinase holoenzyme complex /// cyclin-dependent protein kinase activity /// protein binding /// ATP binding /// nucleus /// cytoplasm /// cytosol /// plasma membrane /// protein amino acid phosphorylation /// cell cycle /// Wnt receptor signaling pathway /// transferase activity /// cyclin binding…
7996211	-0.712551	0.61024	9.44563	-4.78081	0.000121678	0.00398377	0.971194	GINS3	GINS complex subunit 3 (Psf3 homolog)	nucleus /// DNA replication
7972713	-0.712662	0.610193	8.96941	-5.35052	3.35917e-05	0.00149532	2.24731	EFNB2	ephrin-B2	lymph vessel development /// plasma membrane /// integral to plasma membrane /// cell-cell signaling /// multicellular organismal development /// nervous system development /// anatomical structure morphogenesis /// organ morphogenesis /// cell differentiation /// interspecies interaction between organisms /// ephrin receptor binding /// plasma membrane
8106210	-0.713832	0.609698	9.08352	-5.69987	1.54997e-05	0.000807659	3.01594	RGNEF /// RGNEF	Rho-guanine nucleotide exchange factor /// 190 kDa guanine nucleotide exchange factor	RNA binding /// guanyl-nucleotide exchange factor activity /// Rho guanyl-nucleotide exchange factor activity /// intracellular /// cytoplasm /// plasma membrane /// cell differentiation /// regulation of Rho protein signal transduction /// metal ion binding /// intracellular signaling cascade /// zinc ion binding /// diacylglycerol binding
8020806	-0.714018	0.60962	7.35512	-6.33703	3.92414e-06	0.000288276	4.38235	RNF125	ring finger protein 125	protein binding /// intracellular /// immune response /// zinc ion binding /// ligase activity /// metal ion binding /// modification-dependent protein catabolic process
7964271	-0.714723	0.609322	10.9376	-4.48131	0.000241736	0.00666314	0.292973	PRIM1	primase, DNA, polypeptide 1 (49kDa)	DNA primase activity /// protein binding /// nucleoplasm /// alpha DNA polymerase:primase complex /// DNA replication /// DNA replication, synthesis of RNA primer /// transcription /// transferase activity /// nucleotidyltransferase activity /// metal ion binding /// DNA primase activity /// DNA replication, synthesis of RNA primer /// zinc ion binding
8146357	-0.715178	0.60913	10.9239	-7.19302	6.73265e-07	6.81389e-05	6.13482	MCM4	minichromosome maintenance complex component 4	nucleotide binding /// DNA binding /// DNA helicase activity /// single-stranded DNA binding /// protein binding /// ATP binding /// nucleus /// nucleus /// nucleoplasm /// nucleolus /// DNA replication /// DNA replication /// DNA unwinding involved in replication /// DNA-dependent DNA replication initiation /// nucleoside-triphosphatase activity /// regulation of transcription /// DNA unwinding …
8022761	-0.715437	0.609021	4.35942	-4.45381	0.000257522	0.00699115	0.230586	---	---	---
7963009	-0.71693	0.608391	6.90123	-5.31108	3.66864e-05	0.00160456	2.1598	RHEBL1	Ras homolog enriched in brain like 1	nucleotide binding /// GTPase activity /// GTP binding /// intracellular /// cytoplasm /// plasma membrane /// signal transduction /// small GTPase mediated signal transduction /// TOR signaling pathway /// positive regulation of NF-kappaB transcription factor activity
8086981	-0.717306	0.608232	8.64407	-4.6509	0.00016377	0.00498449	0.677424	UCN2	urocortin 2	G-protein-coupled receptor binding /// receptor binding /// hormone activity /// extracellular region /// cAMP biosynthetic process /// response to stress /// digestion /// cell proliferation /// hormone binding
8153223	-0.720162	0.607029	10.3732	-6.33625	3.93061e-06	0.000288276	4.38071	PTK2	PTK2 protein tyrosine kinase 2	nucleotide binding /// microtubule cytoskeleton organization /// angiogenesis /// blood vessel development /// vasculogenesis /// neuron migration /// protein tyrosine kinase activity /// non-membrane spanning protein tyrosine kinase activity /// signal transducer activity /// protein binding /// ATP binding /// cytoplasm /// cytosol /// cytoskeleton /// plasma membrane /// focal adhesion /// pro…
7903867	-0.720379	0.606938	8.24648	-7.4659	3.91853e-07	4.56207e-05	6.67205	KCNC4	potassium voltage-gated channel, Shaw-related subfamily, member 4	voltage-gated ion channel activity /// voltage-gated potassium channel activity /// potassium channel activity /// protein binding /// ion transport /// potassium ion transport /// synaptic transmission /// voltage-gated potassium channel complex /// membrane /// integral to membrane /// transmembrane transport /// voltage-gated potassium channel activity /// potassium ion transport /// voltage-g…
7971866	-0.72101	0.606673	9.70833	-4.32302	0.000348095	0.00879403	-0.0663365	DIAPH3	diaphanous homolog 3 (Drosophila)	actin binding /// cellular component organization /// actin cytoskeleton organization /// Rho GTPase binding
7920291	-0.721727	0.606371	12.2207	-11.0768	7.3992e-10	2.96833e-07	12.8238	S100A16	S100 calcium binding protein A16	calcium ion binding /// nucleus /// nucleolus /// cytoplasm /// protein homodimerization activity /// response to calcium ion
7965359	-0.722501	0.606046	10.6897	-6.77726	1.56573e-06	0.000135063	5.29617	ATP2B1	ATPase, Ca++ transporting, plasma membrane 1	nucleotide binding /// calcium-transporting ATPase activity /// calmodulin binding /// ATP binding /// plasma membrane /// integral to plasma membrane /// ATP biosynthetic process /// transport /// cation transport /// calcium ion transport /// metabolic process /// hydrolase activity /// hydrolase activity, acting on acid anhydrides, catalyzing transmembrane movement of substances /// metal ion …
8118945	-0.728571	0.603501	9.57512	-6.25885	4.63188e-06	0.000325171	4.21739	PPARD	peroxisome proliferator-activated receptor delta	negative regulation of transcription from RNA polymerase II promoter /// placenta development /// DNA binding /// transcription factor activity /// transcription factor activity /// steroid hormone receptor activity /// ligand-dependent nuclear receptor activity /// fatty acid binding /// protein binding /// nucleus /// glucose metabolic process /// generation of precursor metabolites and energy …
8109973	-0.730745	0.602593	6.42881	-4.25714	0.000405243	0.00996556	-0.215904	---	---	---
8096116	-0.733672	0.601371	10.8744	-6.63718	2.09162e-06	0.000171539	5.00821	AGPAT9	1-acylglycerol-3-phosphate O-acyltransferase 9	glycerol-3-phosphate O-acyltransferase activity /// endoplasmic reticulum /// endoplasmic reticulum membrane /// metabolic process /// acyltransferase activity /// phospholipid biosynthetic process /// membrane /// integral to membrane /// transferase activity /// triglyceride biosynthetic process /// regulation of TOR signaling pathway
8066136	-0.734056	0.601211	9.51669	-6.75286	1.64641e-06	0.00013988	5.24621	RBL1	retinoblastoma-like 1 (p107)	negative regulation of transcription from RNA polymerase II promoter /// protein binding /// nucleus /// transcription factor complex /// cell cycle /// transcription factor binding /// chromatin modification /// regulation of lipid kinase activity /// interspecies interaction between organisms /// regulation of transcription
8072382	-0.734208	0.601148	7.88562	-5.94106	9.16098e-06	0.00054465	3.53893	OSBP2	oxysterol binding protein 2	lipid transport /// steroid metabolic process /// membrane
7952830	-0.736458	0.600211	10.7178	-6.58162	2.34786e-06	0.00018658	4.89328	NCAPD3	non-SMC condensin II complex, subunit D3	nuclear condensin complex /// binding /// nucleus /// cell cycle /// mitosis /// mitotic chromosome condensation /// cell division
8083941	-0.737687	0.5997	11.0695	-5.26935	4.02794e-05	0.0017261	2.06704	ECT2	epithelial cell transforming sequence 2 oncogene	signal transducer activity /// guanyl-nucleotide exchange factor activity /// Rho guanyl-nucleotide exchange factor activity /// protein binding /// intracellular /// cytosol /// apoptosis /// induction of apoptosis by extracellular signals /// regulation of Rho protein signal transduction /// positive regulation of I-kappaB kinase/NF-kappaB cascade /// cell morphogenesis /// guanyl-nucleotide ex…
7976621	-0.738028	0.599558	10.0803	-4.35777	0.000321289	0.00830588	0.0125649	VRK1	vaccinia related kinase 1	nucleotide binding /// protein serine/threonine kinase activity /// protein binding /// ATP binding /// nucleus /// nucleolus /// cytoplasm /// protein amino acid phosphorylation /// transferase activity /// intracellular membrane-bounded organelle /// protein amino acid autophosphorylation /// protein serine/threonine kinase activity /// nucleus
7901867	-0.739035	0.59914	9.91549	-5.14373	5.34151e-05	0.00213513	1.78693	USP1	ubiquitin specific peptidase 1	cysteine-type endopeptidase activity /// ubiquitin thiolesterase activity /// ubiquitin-specific protease activity /// protein binding /// nucleus /// nucleoplasm /// regulation of DNA repair /// ubiquitin-dependent protein catabolic process /// peptidase activity /// response to UV /// protein deubiquitination /// response to DNA damage stimulus
7954527	-0.739524	0.598937	10.6365	-4.86841	9.96513e-05	0.00344558	1.16886	ARNTL2	aryl hydrocarbon receptor nuclear translocator-like 2	transcription factor activity /// transcription factor activity /// signal transducer activity /// protein binding /// nucleus /// nucleus /// regulation of transcription, DNA-dependent /// regulation of transcription from RNA polymerase II promoter /// signal transduction /// circadian rhythm /// entrainment of circadian clock /// rhythmic process
8110982	-0.742294	0.597788	11.7986	-4.8141	0.000112778	0.00374768	1.04635	DAP	death-associated protein	apoptosis /// induction of apoptosis by extracellular signals
8142120	-0.742411	0.59774	11.7265	-5.76251	1.35122e-05	0.000725672	3.1524	NAMPT	nicotinamide phosphoribosyltransferase	cytokine activity /// cytoplasm /// cytosol /// nicotinamide metabolic process /// signal transduction /// cell-cell signaling /// positive regulation of cell proliferation /// insulin receptor signaling pathway /// transferase activity, transferring glycosyl groups /// pyridine nucleotide biosynthetic process /// NAD metabolic process /// nicotinamide phosphoribosyltransferase activity /// posit…
7952274	-0.743913	0.597117	8.1821	-5.70597	1.52937e-05	0.000801945	3.02925	PVRL1	poliovirus receptor-related 1 (herpesvirus entry mediator C)	lens morphogenesis in camera-type eye /// protein binding /// extracellular region /// microsome /// plasma membrane /// adherens junction /// cell-cell adherens junction /// immune response /// cell adhesion /// homophilic cell adhesion /// heterophilic cell-cell adhesion /// axon guidance /// coreceptor activity /// membrane /// integral to membrane /// cell-cell adhesion /// catenin complex //…
8089875	-0.744536	0.59686	9.17143	-5.82118	1.18874e-05	0.000655885	3.27981	POLQ	polymerase (DNA directed), theta	nucleotide binding /// damaged DNA binding /// DNA-directed DNA polymerase activity /// ATP binding /// nucleoplasm /// DNA replication /// DNA repair /// transferase activity /// nucleotidyltransferase activity /// DNA-directed DNA polymerase activity /// DNA repair /// response to DNA damage stimulus
7941214	-0.745376	0.596512	9.77332	-5.51882	2.31037e-05	0.00110848	2.61915	POLA2	polymerase (DNA directed), alpha 2 (70kD subunit)	protein import into nucleus, translocation /// molecular_function /// DNA binding /// DNA-directed DNA polymerase activity /// protein binding /// nucleus /// nucleoplasm /// alpha DNA polymerase:primase complex /// DNA replication /// protein heterodimerization activity
7986601	-0.745899	0.596296	8.66758	-5.8548	1.10477e-05	0.000618247	3.35266	LOC401805	hypothetical gene supported by NM_144726	---
7986739	-0.745899	0.596296	8.66758	-5.8548	1.10477e-05	0.000618247	3.35266	LOC401805	hypothetical gene supported by NM_144726	---
7900510	-0.74626	0.596147	11.131	-8.57861	4.77885e-08	8.68442e-06	8.75366	CTPS	CTP synthase	nucleotide binding /// CTP synthase activity /// CTP synthase activity /// CTP synthase activity /// protein binding /// ATP binding /// cellular_component /// cytosol /// nucleobase, nucleoside, nucleotide and nucleic acid metabolic process /// pyrimidine nucleotide biosynthetic process /// CTP biosynthetic process /// glutamine metabolic process /// ligase activity /// response to drug
7906264	-0.746772	0.595935	8.14318	-5.18017	4.92087e-05	0.00200797	1.86831	PEAR1	platelet endothelial aggregation receptor 1	plasma membrane /// integral to membrane
8041763	-0.746801	0.595924	8.55443	-6.56564	2.4274e-06	0.000191076	4.86014	PRKCE	protein kinase C, epsilon	nucleotide binding /// protein kinase C activity /// calcium-independent protein kinase C activity /// signal transducer activity /// protein binding /// ATP binding /// nucleus /// cytoplasm /// plasma membrane /// protein amino acid phosphorylation /// induction of apoptosis /// signal transduction /// transferase activity /// enzyme binding /// metal ion binding /// regulation of peptidyl-tyro…
8065071	-0.750121	0.594554	8.25236	-4.35597	0.000322628	0.00831466	0.0084708	FLRT3	fibronectin leucine rich transmembrane protein 3	receptor signaling protein activity /// proteinaceous extracellular matrix /// integral to plasma membrane /// cell adhesion /// biological_process /// membrane /// protein binding, bridging
8051762	-0.752578	0.593542	7.73485	-4.82957	0.00010887	0.00366908	1.08126	SLC8A1	solute carrier family 8 (sodium/calcium exchanger), member 1	response to hypoxia /// regulation of the force of heart contraction /// regulation of sodium ion transport /// calcium:sodium antiporter activity /// calmodulin binding /// membrane fraction /// plasma membrane /// integral to plasma membrane /// caveola /// ion transport /// sodium ion transport /// calcium ion transport /// cellular calcium ion homeostasis /// muscle contraction /// cell commu…
7911017	-0.753172	0.593298	9.67455	-7.85062	1.85829e-07	2.61078e-05	7.41154	SDCCAG8	serologically defined colon cancer antigen 8	cytoplasm /// centrosome /// cytosol /// cytoskeleton
7902957	-0.754812	0.592624	8.28477	-5.75516	1.37313e-05	0.000735066	3.1364	EPHX4	epoxide hydrolase 4	membrane /// integral to membrane /// hydrolase activity
7947147	-0.755139	0.592489	9.31585	-5.56159	2.10178e-05	0.00102614	2.71319	SVIP	small VCP/p97-interacting protein	Golgi membrane /// endoplasmic reticulum /// Golgi apparatus /// plasma membrane /// smooth endoplasmic reticulum membrane
8077728	-0.755981	0.592144	8.35563	-5.03119	6.88691e-05	0.00257809	1.53492	LOC442075	hypothetical LOC442075	---
8144516	-0.757354	0.59158	9.13888	-5.31915	3.60304e-05	0.00158901	2.17772	ERI1	exoribonuclease 1	intracellular /// nucleus /// nucleolus /// nucleolus /// cytoplasm /// cytoplasm /// 3'-5' exonuclease activity /// hydrolase activity /// rRNA binding /// gene silencing by RNA /// rRNA 3'-end processing /// ribosome binding /// metal ion binding /// histone mRNA catabolic process /// histone pre-mRNA 3'end processing complex /// histone pre-mRNA stem-loop binding /// magnesium ion binding
8030569	-0.757385	0.591568	8.95455	-5.55394	2.13765e-05	0.00103908	2.69637	ZNF473	zinc finger protein 473	DNA binding /// protein binding /// intracellular /// nucleus /// regulation of transcription, DNA-dependent /// histone mRNA 3'-end processing /// zinc ion binding /// Cajal body /// metal ion binding
8002762	-0.758765	0.591002	11.2886	-4.48907	0.000237457	0.00657241	0.310589	RFWD3	ring finger and WD repeat domain 3	p53 binding /// ubiquitin-protein ligase activity /// protein binding /// nucleus /// zinc ion binding /// response to ionizing radiation /// protein ubiquitination /// G1/S DNA damage checkpoint /// metal ion binding /// MDM2 binding /// protein binding
8023646	-0.761313	0.589959	7.95379	-7.24119	6.11473e-07	6.33696e-05	6.23041	BCL2	B-cell CLL/lymphoma 2	G1/S transition of mitotic cell cycle /// protein phosphatase type 2A complex /// protein polyubiquitination /// cell morphogenesis /// ovarian follicle development /// ureteric bud development /// branching involved in ureteric bud morphogenesis /// behavioral fear response /// response to hypoxia /// B cell homeostasis /// release of cytochrome c from mitochondria /// release of cytochrome c fr…
7913852	-0.763069	0.589242	8.14955	-6.79433	1.51171e-06	0.000131284	5.33108	C1orf135	chromosome 1 open reading frame 135	---
8163116	-0.765394	0.588292	7.46346	-7.14313	7.44104e-07	7.39595e-05	6.03546	EPB41L4B	erythrocyte membrane protein band 4.1 like 4B	structural constituent of cytoskeleton /// binding /// cytoplasm /// cytoskeleton /// cytoskeletal protein binding /// extrinsic to membrane /// cytoskeleton
8144786	-0.765656	0.588186	10.2602	-6.79921	1.49663e-06	0.000130796	5.34105	SLC7A2	solute carrier family 7 (cationic amino acid transporter, y+ system), member 2	membrane fraction /// integral to plasma membrane /// cellular amino acid metabolic process /// transport /// amino acid transport /// basic amino acid transmembrane transporter activity /// membrane /// transmembrane transport /// amino acid transport
7932985	-0.766058	0.588022	11.4185	-4.80209	0.00011591	0.00382504	1.01924	NRP1	neuropilin 1	patterning of blood vessels /// receptor activity /// vascular endothelial growth factor receptor activity /// protein binding /// extracellular region /// plasma membrane /// cell adhesion /// signal transduction /// cell-cell signaling /// multicellular organismal development /// nervous system development /// axon guidance /// axonal fasciculation /// heart development /// positive regulation …
7934026	-0.766365	0.587897	8.77536	-6.30982	4.1569e-06	0.00030221	4.32503	DNA2	DNA replication helicase 2 homolog (yeast)	nucleotide binding /// DNA binding /// ATP-dependent DNA helicase activity /// helicase activity /// ATP binding /// nucleoplasm /// mitochondrion /// gamma DNA polymerase complex /// mitochondrial DNA replication /// base-excision repair /// hydrolase activity /// ATPase activity /// site-specific endodeoxyribonuclease activity, specific for altered base /// 5'-flap endonuclease activity /// DNA…
7970924	-0.7702	0.586336	8.08048	-8.9161	2.60604e-08	5.196e-06	9.35088	STARD13	StAR-related lipid transfer (START) domain containing 13	GTPase activator activity /// protein binding /// intracellular /// cytoplasm /// mitochondrion /// lipid particle /// signal transduction /// membrane /// mitochondrial membrane
8065710	-0.770759	0.586109	9.43909	-5.76773	1.33589e-05	0.000720924	3.16375	E2F1	E2F transcription factor 1	G1 phase of mitotic cell cycle /// negative regulation of transcription from RNA polymerase II promoter /// DNA binding /// DNA binding /// transcription factor activity /// transcription factor activity /// transcription corepressor activity /// protein binding /// nucleus /// nucleoplasm /// transcription factor complex /// cytoplasm /// mitochondrion /// apoptosis /// transcription factor bind…
8098904	-0.773982	0.584801	10.3263	-9.35749	1.2047e-08	2.90672e-06	10.1087	SLBP	stem-loop binding protein	mRNA binding /// protein binding /// nucleus /// cytoplasm /// mRNA processing /// histone mRNA 3'-end processing /// ribonucleoprotein complex /// DNA replication involved in S phase /// regulation of S phase /// mRNA transport /// histone pre-mRNA 3'end processing complex /// histone pre-mRNA stem-loop binding /// histone pre-mRNA DCP binding /// mRNA binding /// nucleus /// nucleoplasm /// cyt…
8166525	-0.774504	0.58459	9.54748	-5.67757	1.62778e-05	0.000840311	2.96725	POLA1	polymerase (DNA directed), alpha 1, catalytic subunit	S phase of mitotic cell cycle /// nucleotide binding /// DNA synthesis involved in DNA repair /// DNA synthesis involved in DNA repair /// chromatin /// nucleoside binding /// DNA binding /// DNA binding /// chromatin binding /// DNA-directed DNA polymerase activity /// DNA-directed DNA polymerase activity /// DNA primase activity /// protein binding /// nucleus /// nuclear envelope /// nucleopla…
7969438	-0.774827	0.584459	9.71019	-4.86905	9.95072e-05	0.00344446	1.17029	LMO7	LIM domain 7	ubiquitin ligase complex /// ubiquitin-protein ligase activity /// protein binding /// nucleus /// cytoplasm /// cell-cell adherens junction /// zinc ion binding /// apical plasma membrane /// cell-cell adhesion /// protein ubiquitination /// actinin binding /// metal ion binding
7985213	-0.776098	0.583944	10.2441	-4.8991	9.2931e-05	0.00325718	1.238	CHRNA5	cholinergic receptor, nicotinic, alpha 5	receptor activity /// nicotinic acetylcholine-activated cation-selective channel activity /// ion channel activity /// extracellular ligand-gated ion channel activity /// plasma membrane /// nicotinic acetylcholine-gated receptor-channel complex /// transport /// ion transport /// signal transduction /// synaptic transmission /// acetylcholine receptor activity /// integral to membrane /// cell j…
8087833	-0.77697	0.583591	11.2249	-4.85767	0.000102117	0.00350605	1.14465	DUSP7	dual specificity phosphatase 7	protein tyrosine phosphatase activity /// protein binding /// nucleoplasm /// cytoplasm /// cytosol /// protein amino acid dephosphorylation /// hydrolase activity /// MAP kinase tyrosine/serine/threonine phosphatase activity /// negative regulation of MAP kinase activity /// protein serine/threonine phosphatase activity /// protein tyrosine phosphatase activity /// protein amino acid dephosphory…
8090772	-0.778656	0.58291	11.38	-7.74322	2.28403e-07	3.06659e-05	7.20721	TOPBP1	topoisomerase (DNA) II binding protein 1	condensed nuclear chromosome /// spindle pole /// male germ cell nucleus /// DNA binding /// protein binding /// intracellular /// nucleus /// cytoplasm /// microtubule organizing center /// cytoskeleton /// DNA metabolic process /// DNA repair /// response to DNA damage stimulus /// protein C-terminus binding /// response to ionizing radiation /// PML body /// nucleus
7963786	-0.77974	0.582472	11.379	-4.39316	0.000296122	0.00779445	0.0929181	ITGA5	integrin, alpha 5 (fibronectin receptor, alpha polypeptide)	ruffle /// receptor activity /// integrin binding /// protein binding /// plasma membrane /// cell-cell junction /// focal adhesion /// cell-substrate junction assembly /// cell adhesion /// heterophilic cell-cell adhesion /// leukocyte cell-cell adhesion /// integrin-mediated signaling pathway /// memory /// integrin complex /// external side of plasma membrane /// integral to membrane /// synap…
7910416	-0.780862	0.582019	9.37929	-7.29908	5.44889e-07	5.83146e-05	6.34487	URB2	URB2 ribosome biogenesis 2 homolog (S. cerevisiae)	nucleus /// nucleolus /// nucleus /// nucleolus
8027402	-0.781075	0.581933	9.03879	-5.6642	1.67629e-05	0.000862681	2.93805	CCNE1	cyclin E1	G1/S transition of mitotic cell cycle /// antral ovarian follicle growth /// liver development /// transcription coactivator activity /// protein binding /// nucleus /// nucleus /// nucleoplasm /// cytoplasm /// centrosome /// cytosol /// cell cycle /// response to organic nitrogen /// response to purine /// androgen receptor signaling pathway /// organ regeneration /// cellular response to nutri…
8099797	-0.783972	0.580766	9.48719	-5.3145	3.64074e-05	0.0016014	2.16738	RELL1 /// C4orf19	RELT-like 1 /// chromosome 4 open reading frame 19	plasma membrane /// integral to membrane
7933084	-0.784054	0.580733	12.1307	-6.09398	6.58771e-06	0.000431022	3.86696	NAMPT	nicotinamide phosphoribosyltransferase	cytokine activity /// cytoplasm /// cytosol /// nicotinamide metabolic process /// signal transduction /// cell-cell signaling /// positive regulation of cell proliferation /// insulin receptor signaling pathway /// transferase activity, transferring glycosyl groups /// pyridine nucleotide biosynthetic process /// NAD metabolic process /// nicotinamide phosphoribosyltransferase activity /// posit…
8114536	-0.785042	0.580335	9.56636	-5.0524	6.56427e-05	0.00249225	1.58249	TMEM173	transmembrane protein 173	protein binding /// mitochondrion /// mitochondrial outer membrane /// endoplasmic reticulum /// endoplasmic reticulum membrane /// plasma membrane /// apoptosis /// integral to membrane /// innate immune response
7960865	-0.791694	0.577665	10.209	-4.3341	0.000339315	0.00863776	-0.0411873	SLC2A3	solute carrier family 2 (facilitated glucose transporter), member 3	transporter activity /// glucose transmembrane transporter activity /// cytoplasm /// plasma membrane /// plasma membrane /// carbohydrate metabolic process /// carbohydrate transport /// glucose transport /// integral to membrane /// substrate-specific transmembrane transporter activity /// transmembrane transport /// glucose transmembrane transporter activity
8014454	-0.792311	0.577418	10.2643	-6.24232	4.79765e-06	0.0003349	4.18241	MYO19	myosin XIX	nucleotide binding /// motor activity /// actin binding /// ATP binding /// cytoplasm /// myosin complex
7906863	-0.79325	0.577043	11.6336	-6.08619	6.69887e-06	0.000434799	3.85031	UAP1	UDP-N-acteylglucosamine pyrophosphorylase 1	UDP-N-acetylglucosamine diphosphorylase activity /// nucleus /// nucleolus /// cytoplasm /// UDP-N-acetylglucosamine biosynthetic process /// metabolic process /// transferase activity /// nucleotidyltransferase activity /// UDP-N-acetylglucosamine diphosphorylase activity /// cytoplasm
8154725	-0.795317	0.576217	11.5338	-5.69729	1.55877e-05	0.000810975	3.01032	KRT18	keratin 18	structural molecule activity /// protein binding /// cytoplasm /// microtubule organizing center /// intermediate filament /// cell cycle /// anatomical structure morphogenesis /// centriolar satellite /// Golgi to plasma membrane CFTR protein transport /// negative regulation of apoptosis /// interspecies interaction between organisms /// keratin filament /// perinuclear region of cytoplasm /// …
8073766	-0.795375	0.576193	6.59329	-4.60139	0.000183457	0.00542984	0.565269	RIBC2	RIB43A domain with coiled-coils 2	---
8130916	-0.795707	0.576061	10.0354	-6.29352	4.3031e-06	0.00030813	4.29064	C6orf120 /// PHF10 /// PHF10	chromosome 6 open reading frame 120 /// PHD finger protein 10 /// PHD finger protein 10	protein binding /// nucleus /// nervous system development /// zinc ion binding /// regulation of transcription /// metal ion binding /// npBAF complex /// extracellular region
8057990	-0.795985	0.57595	7.75597	-4.83193	0.000108284	0.00365302	1.0866	ANKRD44	ankyrin repeat domain 44	protein binding
8104570	-0.799722	0.57446	7.71204	-6.61123	2.20751e-06	0.000179044	4.95459	FAM105A	family with sequence similarity 105, member A	---
8037408	-0.799807	0.574426	8.39955	-4.37715	0.000307251	0.00800511	0.0565707	KCNN4	potassium intermediate/small conductance calcium-activated channel, subfamily N, member 4	ion channel activity /// calmodulin binding /// ion transport /// potassium ion transport /// cell volume homeostasis /// defense response /// voltage-gated potassium channel complex /// calcium-activated potassium channel activity /// membrane /// integral to membrane /// phospholipid translocation /// saliva secretion /// positive regulation of protein secretion /// potassium ion transport /// …
7947363	-0.803409	0.572994	8.65019	-8.95639	2.42638e-08	4.98711e-06	9.42114	WT1	Wilms tumor 1	negative regulation of transcription from RNA polymerase II promoter /// vasculogenesis /// metanephros development /// branching involved in ureteric bud morphogenesis /// kidney development /// mesonephros development /// double-stranded DNA binding /// transcription factor activity /// RNA binding /// protein binding /// intracellular /// nucleus /// nucleus /// nucleus /// nucleoplasm /// cyt…
8120602	-0.803951	0.572778	10.9881	-6.09389	6.58889e-06	0.000431022	3.86678	OGFRL1	opioid growth factor receptor-like 1	receptor activity /// membrane
8118963	-0.805764	0.572059	9.26471	-4.8419	0.000105852	0.00359308	1.10909	FANCE	Fanconi anemia, complementation group E	molecular_function /// protein binding /// nucleus /// DNA repair /// response to DNA damage stimulus
8117225	-0.808443	0.570998	10.4578	-7.69427	2.51045e-07	3.29096e-05	7.11355	GMNN	geminin, DNA replication inhibitor	protein binding /// nucleus /// nucleoplasm /// negative regulation of DNA replication /// organ morphogenesis /// negative regulation of cell cycle
8180352	-0.808535	0.570961	7.19868	-5.94315	9.11961e-06	0.000543212	3.54344	---	---	---
7969574	-0.808803	0.570855	12.0921	-5.92739	9.43638e-06	0.000553174	3.50947	KRT18 /// MIR622	keratin 18 /// microRNA 622	structural molecule activity /// protein binding /// cytoplasm /// microtubule organizing center /// intermediate filament /// cell cycle /// anatomical structure morphogenesis /// centriolar satellite /// Golgi to plasma membrane CFTR protein transport /// negative regulation of apoptosis /// interspecies interaction between organisms /// keratin filament /// perinuclear region of cytoplasm /// …
8041383	-0.809444	0.570602	9.55034	-5.15353	5.22488e-05	0.00210112	1.80883	LTBP1	latent transforming growth factor beta binding protein 1	transforming growth factor beta receptor activity /// binding /// calcium ion binding /// extracellular region /// proteinaceous extracellular matrix /// biological_process /// growth factor binding
8081219	-0.811279	0.569876	8.9732	-4.91237	9.01706e-05	0.00317715	1.26786	ST3GAL6	ST3 beta-galactoside alpha-2,3-sialyltransferase 6	Golgi membrane /// Golgi apparatus /// amino sugar metabolic process /// protein amino acid glycosylation /// glycolipid metabolic process /// sialyltransferase activity /// protein lipoylation /// membrane /// integral to membrane /// integral to Golgi membrane /// sialyltransferase activity /// integral to membrane
8154316	-0.816166	0.567949	10.2614	-9.24972	1.45122e-08	3.37924e-06	9.92608	UHRF2	ubiquitin-like with PHD and ring finger domains 2	DNA binding /// ubiquitin-protein ligase activity /// protein binding /// nucleus /// ubiquitin-dependent protein catabolic process /// zinc ion binding /// cell proliferation /// protein ubiquitination /// ligase activity /// cell differentiation /// metal ion binding /// regulation of cell cycle /// protein autoubiquitination
7961365	-0.817376	0.567473	5.85784	-6.97732	1.04011e-06	9.81095e-05	5.70273	MANSC1	MANSC domain containing 1	membrane /// integral to membrane
8112376	-0.81862	0.566984	10.7903	-5.04819	6.62717e-05	0.00250513	1.57303	CENPK	centromere protein K	condensed chromosome kinetochore /// protein binding /// nucleus /// chromosome /// positive regulation of transcription from RNA polymerase II promoter /// chromosome, centromeric region
8099760	-0.820573	0.566217	6.75369	-5.17693	4.95688e-05	0.00201772	1.86107	ARAP2	ArfGAP with RhoGAP domain, ankyrin repeat and PH domain 2	phosphatidylinositol-3,4,5-trisphosphate binding /// intracellular /// cytoplasm /// signal transduction /// ARF GTPase activator activity /// zinc ion binding /// regulation of ARF GTPase activity /// metal ion binding
8083146	-0.82098	0.566057	9.08202	-5.55595	2.12817e-05	0.00103751	2.70079	PLS1 /// PLS1	plastin 1 (I isoform) /// plastin 1	structural constituent of cytoskeleton /// calcium ion binding /// cytoplasm /// actin filament binding
7952453	-0.821664	0.565789	8.1872	-6.88175	1.26373e-06	0.000114968	5.50919	ROBO4	roundabout homolog 4, magic roundabout (Drosophila)	angiogenesis /// receptor activity /// multicellular organismal development /// integral to membrane /// cell differentiation /// regulation of cell migration
8002778	-0.822225	0.565569	9.64235	-5.88619	1.0319e-05	0.000591529	3.42053	MLKL	mixed lineage kinase domain-like	protein tyrosine kinase activity /// protein binding /// ATP binding /// protein amino acid phosphorylation
8057736	-0.825736	0.564194	8.20684	-4.54683	0.000207935	0.00596349	0.4416	TMEM194B	transmembrane protein 194B	membrane /// integral to membrane
8100382	-0.82813	0.563259	10.5942	-5.38622	3.10204e-05	0.0014188	2.32641	CHIC2	cysteine-rich hydrophobic domain 2	molecular_function /// protein binding /// cellular_component /// Golgi apparatus /// Golgi-associated vesicle /// plasma membrane /// biological_process /// cytoplasmic vesicle
7952445	-0.829199	0.562841	9.64822	-8.43052	6.26413e-08	1.08634e-05	8.48667	C11orf61	chromosome 11 open reading frame 61	---
7969576	-0.830244	0.562434	8.16101	-4.76328	0.000126644	0.00409405	0.931614	MIR17HG /// MIR17 /// MIR19A /// MIR20A /// MIR92A1 /// MIR19B1 /// MIR18A	MIR17 host gene (non-protein coding) /// microRNA 17 /// microRNA 19a /// microRNA 20a /// microRNA 92a-1 /// microRNA 19b-1 /// microRNA 18a	---
7970441	-0.83036	0.562389	7.30575	-4.32346	0.000347742	0.00879177	-0.0653366	GJB2	gap junction protein, beta 2, 26kDa	Golgi membrane /// gap junction channel activity /// protein binding /// plasma membrane /// connexon complex /// transport /// cell-cell signaling /// sensory perception of sound /// integral to membrane /// lateral plasma membrane /// cell junction /// male genitalia development /// plasma membrane /// connexon complex /// cell-cell signaling /// sensory perception of sound
8057732	-0.83527	0.560478	9.26629	-7.92355	1.61682e-07	2.32535e-05	7.54936	TMEM194B	transmembrane protein 194B	membrane /// integral to membrane
7972674	-0.835334	0.560453	9.36187	-7.31961	5.23115e-07	5.65524e-05	6.38535	C13orf27	chromosome 13 open reading frame 27	hydrolase activity
8173208	-0.835358	0.560444	9.31634	-4.39611	0.000294118	0.00776011	0.0996083	SPIN4	spindlin family, member 4	gamete generation
7959052	-0.835831	0.56026	10.131	-7.3711	4.72382e-07	5.31382e-05	6.4866	RFC5	replication factor C (activator 1) 5, 36.5kDa	nucleotide binding /// DNA clamp loader activity /// protein binding /// ATP binding /// nucleus /// nucleoplasm /// DNA replication factor C complex /// DNA replication /// DNA replication /// DNA repair /// nucleotide-excision repair, DNA gap filling /// nucleoside-triphosphatase activity /// enzyme binding
8083094	-0.835872	0.560245	9.37464	-4.61258	0.00017881	0.00534454	0.590614	RASA2	RAS p21 protein activator 2	Ras GTPase activator activity /// intracellular /// cytoplasm /// signal transduction /// metal ion binding /// perinuclear region of cytoplasm /// regulation of small GTPase mediated signal transduction /// intracellular signaling cascade /// zinc ion binding
8157890	-0.837167	0.559742	9.91309	-4.66174	0.000159754	0.00489808	0.701959	PBX3	pre-B-cell leukemia homeobox 3	transcription factor activity /// nucleus /// cytoplasm /// regulation of transcription, DNA-dependent /// anterior compartment pattern formation /// posterior compartment specification /// sequence-specific DNA binding /// nucleus /// anterior compartment specification
7952341	-0.837624	0.559564	10.6092	-5.35369	3.3355e-05	0.00149317	2.25434	ASAM	adipocyte-specific adhesion molecule	membrane fraction /// nucleus /// cytoplasm /// plasma membrane /// tight junction /// integral to membrane /// cell junction /// plasma membrane /// cell junction
8064978	-0.838633	0.559173	8.92063	-8.34266	7.36521e-08	1.25887e-05	8.3268	JAG1	jagged 1 (Alagille syndrome)	angiogenesis /// cell fate determination /// morphogenesis of an epithelial sheet /// Notch binding /// structural molecule activity /// calcium ion binding /// protein binding /// extracellular region /// plasma membrane /// integral to plasma membrane /// cell communication /// Notch signaling pathway /// multicellular organismal development /// nervous system development /// growth factor acti…
8003503	-0.839031	0.559019	9.15968	-8.53303	5.1924e-08	9.24553e-06	8.67181	ZNF276 /// FANCA	zinc finger protein 276 /// Fanconi anemia, complementation group A	protein binding /// nucleus /// cytoplasm /// DNA repair /// protein complex assembly /// male meiosis /// male gonad development /// female gonad development /// regulation of cell proliferation /// DNA binding /// intracellular /// zinc ion binding /// regulation of transcription /// metal ion binding /// nucleus /// cytoplasm /// DNA repair /// response to DNA damage stimulus
8088397	-0.840177	0.558575	7.39047	-5.44767	2.70546e-05	0.00127237	2.46229	ACOX2 /// ACOX2	acyl-Coenzyme A oxidase 2, branched chain /// acyl-CoA oxidase 2, branched chain	acyl-CoA dehydrogenase activity /// acyl-CoA oxidase activity /// fatty acid binding /// peroxisome /// lipid metabolic process /// fatty acid metabolic process /// fatty acid beta-oxidation /// bile acid metabolic process /// 3alpha,7alpha,12alpha-trihydroxy-5beta-cholestanoyl-CoA 24-hydroxylase activity /// FAD binding /// oxidation reduction /// acyl-CoA oxidase activity /// peroxisome /// ele…
8055426	-0.84049	0.558454	10.0511	-6.9554	1.08752e-06	0.000101717	5.65844	MCM6	minichromosome maintenance complex component 6	nucleotide binding /// DNA binding /// DNA helicase activity /// single-stranded DNA binding /// protein binding /// ATP binding /// nucleus /// nucleus /// nucleoplasm /// DNA replication /// DNA replication /// DNA unwinding involved in replication /// DNA-dependent DNA replication initiation /// cell cycle /// identical protein binding /// regulation of transcription /// DNA unwinding during r…
8015769	-0.840592	0.558414	8.97713	-4.93573	8.55085e-05	0.00305571	1.32045	BRCA1	breast cancer 1, early onset	ubiquitin ligase complex /// double-strand break repair via homologous recombination /// DNA binding /// transcription coactivator activity /// RNA binding /// ubiquitin-protein ligase activity /// protein binding /// intracellular /// nucleus /// nucleoplasm /// cytoplasm /// postreplication repair /// double-strand break repair /// regulation of transcription from RNA polymerase II promoter ///…
8153201	-0.841939	0.557893	9.57787	-7.87718	1.76631e-07	2.49206e-05	7.46182	EIF2C2	eukaryotic translation initiation factor 2C, 2	RNA 7-methylguanosine cap binding /// cytoplasmic mRNA processing body /// translation initiation factor activity /// endonuclease activity /// protein binding /// nucleus /// cytoplasm /// mRNA cap binding complex /// translation /// regulation of translation /// RNA-induced silencing complex /// hydrolase activity /// gene silencing by RNA /// pre-microRNA processing /// micro-ribonucleoprotein…
7923378	-0.841985	0.557876	12.4536	-4.69873	0.000146784	0.00458057	0.785656	CSRP1	cysteine and glycine-rich protein 1	protein binding /// nucleus /// zinc ion binding /// metal ion binding /// zinc ion binding
8041888	-0.842165	0.557806	9.84748	-6.60309	2.24523e-06	0.000180143	4.93774	MSH6	mutS homolog 6 (E. coli)	nucleotide binding /// magnesium ion binding /// four-way junction DNA binding /// meiotic mismatch repair /// nuclear chromatin /// chromatin binding /// damaged DNA binding /// double-stranded DNA binding /// protein binding /// ATP binding /// nucleus /// DNA repair /// mismatch repair /// mismatch repair /// determination of adult lifespan /// induction of apoptosis by intracellular signals /…
8038624	-0.844473	0.556914	10.5319	-7.17537	6.97502e-07	7.0097e-05	6.09969	C19orf48	chromosome 19 open reading frame 48	---
7946446	-0.850677	0.554524	10.5042	-5.02427	6.9956e-05	0.0026026	1.5194	NRIP3	nuclear receptor interacting protein 3	aspartic-type endopeptidase activity /// proteolysis
7941694	-0.850763	0.554492	10.8863	-7.22178	6.35633e-07	6.53231e-05	6.19193	RBM4 /// RBM14	RNA binding motif protein 4 /// RNA binding motif protein 14	nucleotide binding /// RNA binding /// nucleus /// nucleolus /// cytoplasm /// RNA processing /// mRNA processing /// zinc ion binding /// RNA splicing /// metal ion binding /// RNA binding /// nucleus /// transcription factor complex /// nucleolus /// DNA replication /// DNA repair /// DNA recombination /// response to hormone stimulus /// RNA polymerase II transcription mediator activity /// hi…
7970793	-0.850949	0.55442	6.93145	-5.43193	2.80183e-05	0.00130297	2.42752	SLC46A3	solute carrier family 46, member 3	membrane /// integral to membrane /// transmembrane transport
8119898	-0.855448	0.552694	10.4224	-4.65349	0.000162802	0.00496411	0.683282	VEGFA	vascular endothelial growth factor A	angiogenesis /// ovarian follicle development /// patterning of blood vessels /// vasculogenesis /// response to hypoxia /// positive regulation of endothelial cell proliferation /// positive regulation of endothelial cell proliferation /// fibronectin binding /// blood vessel remodeling /// positive regulation of mesenchymal cell proliferation /// positive regulation of leukocyte migration /// c…
7963092	-0.85561	0.552631	9.13987	-6.96891	1.05804e-06	9.95188e-05	5.68575	FMNL3	formin-like 3	actin binding /// protein binding /// cellular component organization /// actin cytoskeleton organization /// Rho GTPase binding
8091402	-0.857014	0.552094	6.00907	-5.33693	3.46268e-05	0.0015332	2.21717	TM4SF18	transmembrane 4 L six family member 18	membrane /// integral to membrane
8148304	-0.863507	0.549615	9.33274	-5.28637	3.87729e-05	0.00168321	2.10488	TRIB1	tribbles homolog 1 (Drosophila)	protein kinase activity /// protein kinase inhibitor activity /// protein binding /// ATP binding /// nucleus /// cytoplasm /// protein amino acid phosphorylation /// negative regulation of protein kinase activity /// JNK cascade /// transcription factor binding /// negative regulation of smooth muscle cell migration /// mitogen-activated protein kinase kinase binding /// negative regulation of l…
8068633	-0.86608	0.548636	7.02587	-4.45364	0.000257625	0.00699115	0.230191	B3GALT5	UDP-Gal:betaGlcNAc beta 1,3-galactosyltransferase, polypeptide 5	Golgi membrane /// endoplasmic reticulum /// Golgi apparatus /// protein amino acid glycosylation /// galactosyltransferase activity /// UDP-galactose:beta-N-acetylglucosamine beta-1,3-galactosyltransferase activity /// membrane /// integral to membrane /// transferase activity, transferring glycosyl groups /// protein amino acid glycosylation
8071212	-0.867291	0.548175	9.89973	-5.28051	3.92846e-05	0.00169616	2.09186	CDC45L /// CDC45	CDC45 cell division cycle 45-like (S. cerevisiae) /// cell division cycle 45 homolog (S. cerevisiae)	DNA replication checkpoint /// protein binding /// nucleus /// nucleoplasm /// cytoplasm /// centrosome /// DNA replication /// DNA-dependent DNA replication initiation /// cell cycle /// nucleus /// cytoplasm /// DNA replication /// DNA replication initiation
8107594	-0.86751	0.548092	6.88875	-5.99752	8.10819e-06	0.000495822	3.66037	SNCAIP	synuclein, alpha interacting protein	protein binding /// protein binding /// cytoplasm /// dopamine metabolic process /// presynaptic membrane /// neuronal cell body /// regulation of neurotransmitter secretion /// regulation of inclusion body assembly /// cell soma
8108217	-0.869254	0.54743	8.18286	-7.19959	6.64477e-07	6.74546e-05	6.14786	TGFBI	transforming growth factor, beta-induced, 68kDa	integrin binding /// protein binding /// extracellular region /// proteinaceous extracellular matrix /// extracellular space /// negative regulation of cell adhesion /// visual perception /// cell proliferation /// extracellular matrix organization /// extracellular matrix binding /// response to stimulus /// extracellular space /// visual perception
7925954	-0.871936	0.546413	9.87275	-10.5157	1.77426e-09	6.0283e-07	11.9774	NET1	neuroepithelial cell transforming 1	regulation of cell growth /// guanyl-nucleotide exchange factor activity /// Rho guanyl-nucleotide exchange factor activity /// cellular_component /// intracellular /// nucleus /// cytoplasm /// cytosol /// apoptosis /// signal transduction /// induction of apoptosis by extracellular signals /// regulation of Rho protein signal transduction /// guanyl-nucleotide exchange factor activity /// intra…
8096733	-0.872766	0.546099	7.59083	-5.24007	4.30122e-05	0.00181059	2.00188	SGMS2	sphingomyelin synthase 2	Golgi membrane /// Golgi apparatus /// plasma membrane /// integral to plasma membrane /// lipid metabolic process /// sphingolipid metabolic process /// sphingomyelin biosynthetic process /// kinase activity /// transferase activity /// integral to Golgi membrane /// sphingomyelin synthase activity /// ceramide cholinephosphotransferase activity
8085665	-0.873295	0.545898	9.2498	-7.29482	5.49521e-07	5.84582e-05	6.33647	RFTN1	raftlin, lipid raft linker 1	plasma membrane
7949364	-0.876623	0.544641	9.3924	-5.8026	1.2379e-05	0.000675712	3.2395	CDCA5	cell division cycle associated 5	G1/S transition of mitotic cell cycle /// chromatin binding /// protein binding /// nucleus /// cytoplasm /// cell cycle /// mitosis /// mitotic chromosome condensation /// mitotic metaphase plate congression /// cohesin complex /// cell division /// interphase of mitotic cell cycle
7914665	-0.878625	0.543885	7.31901	-5.16387	5.10473e-05	0.00206779	1.83191	---	---	---
8170420	-0.878744	0.543841	8.45984	-7.07567	8.52357e-07	8.39673e-05	5.90054	MAMLD1	mastermind-like domain containing 1	molecular_function /// cellular_component /// nucleus /// biological_process /// regulation of transcription
8058695	-0.881545	0.542786	8.95803	-4.53587	0.000213237	0.00606849	0.416748	BARD1	BRCA1 associated RING domain 1	ubiquitin ligase complex /// tissue homeostasis /// RNA binding /// ubiquitin-protein ligase activity /// protein binding /// intracellular /// nucleus /// nucleus /// cytoplasm /// DNA repair /// response to DNA damage stimulus /// cell cycle arrest /// zinc ion binding /// protein ubiquitination /// ligase activity /// kinase binding /// BRCA1-BARD1 complex /// negative regulation of mRNA 3'-en…
8115664	-0.885228	0.541402	6.85636	-8.06171	1.24446e-07	1.8921e-05	7.80838	---	---	---
8084794	-0.885398	0.541338	8.62241	-5.37183	3.20315e-05	0.00145109	2.29455	IL1RAP	interleukin 1 receptor accessory protein	signal transducer activity /// transmembrane receptor activity /// interleukin-1 receptor activity /// protein binding /// extracellular region /// plasma membrane /// integral to plasma membrane /// protein complex assembly /// inflammatory response /// immune response /// signal transduction /// innate immune response
8036351	-0.886056	0.541091	9.02341	-7.27775	5.68502e-07	5.99032e-05	6.30276	ZNF850P /// ZNF850P	zinc finger protein 850 pseudogene /// zinc finger protein 850 (pseudogene)	DNA binding /// intracellular /// nucleus /// regulation of transcription, DNA-dependent /// zinc ion binding /// metal ion binding
8082350	-0.886715	0.540844	10.461	-7.92245	1.62021e-07	2.32535e-05	7.54729	MCM2	minichromosome maintenance complex component 2	nucleotide binding /// chromatin /// DNA binding /// DNA replication origin binding /// protein binding /// ATP binding /// nucleus /// nucleoplasm /// nuclear origin of replication recognition complex /// DNA replication /// DNA unwinding involved in replication /// DNA-dependent DNA replication initiation /// nucleosome assembly /// cell cycle /// regulation of transcription /// metal ion bindi…
8120880	-0.888587	0.540143	9.98838	-6.38616	3.53724e-06	0.000262901	4.48561	TPBG	trophoblast glycoprotein	protein binding /// cytoplasm /// endoplasmic reticulum /// integral to plasma membrane /// cell adhesion /// membrane
7936856	-0.889907	0.539649	8.21914	-5.93864	9.20918e-06	0.00054465	3.53371	CHST15	carbohydrate (N-acetylgalactosamine 4-sulfate 6-O) sulfotransferase 15	Golgi membrane /// Golgi apparatus /// membrane /// integral to membrane /// transferase activity /// hexose biosynthetic process /// 3'-phosphoadenosine 5'-phosphosulfate binding /// N-acetylgalactosamine 4-sulfate 6-O-sulfotransferase activity
7942832	-0.889973	0.539624	9.65778	-4.89623	9.35398e-05	0.00327163	1.23153	C11orf82	chromosome 11 open reading frame 82	nucleus /// cytoplasm /// apoptosis /// cell cycle /// cell cycle arrest
7994280	-0.895392	0.537601	9.00791	-7.24449	6.07458e-07	6.33696e-05	6.23695	IL4R	interleukin 4 receptor	receptor activity /// interleukin-4 receptor activity /// receptor signaling protein activity /// protein binding /// extracellular region /// plasma membrane /// integral to plasma membrane /// immune response /// signal transduction /// insulin receptor substrate binding /// negative regulation of T-helper 1 cell differentiation /// positive regulation of T-helper 2 cell differentiation /// imm…
8142230	-0.899487	0.536077	7.33938	-5.27762	3.95398e-05	0.00169659	2.08544	---	---	---
8044499	-0.901075	0.535488	12.3788	-7.81728	1.98086e-07	2.74819e-05	7.34829	SLC20A1	solute carrier family 20 (phosphate transporter), member 1	signal transducer activity /// receptor activity /// inorganic phosphate transmembrane transporter activity /// high affinity inorganic phosphate:sodium symporter activity /// sodium:phosphate symporter activity /// integral to plasma membrane /// phosphate metabolic process /// transport /// sodium ion transport /// phosphate transport /// symporter activity /// membrane /// positive regulation …
8156126	-0.902774	0.534857	9.15105	-4.69956	0.000146504	0.00457822	0.787544	RMI1	RMI1, RecQ mediated genome instability 1, homolog (S. cerevisiae)	nucleus /// DNA replication /// nucleic acid binding
8076792	-0.904573	0.534191	9.81078	-7.38515	4.59438e-07	5.22113e-05	6.51417	CERK	ceramide kinase	nucleotide binding /// magnesium ion binding /// integral to membrane of membrane fraction /// ceramide kinase activity /// diacylglycerol kinase activity /// ATP binding /// nucleus /// cytoplasm /// ceramide metabolic process /// activation of protein kinase C activity by G-protein coupled receptor protein signaling pathway /// membrane /// transferase activity /// calcium ion binding /// cytop…
8172270	-0.905971	0.533673	9.54413	-5.53021	2.25283e-05	0.00108557	2.64421	---	---	---
8072413	-0.906583	0.533447	9.62654	-5.62913	1.81078e-05	0.00091354	2.86132	SMTN	smoothelin	actin binding /// cytoplasm /// cytoskeleton /// smooth muscle contraction /// muscle organ development /// structural constituent of muscle /// actin cytoskeleton
7945132	-0.906853	0.533347	9.30893	-4.79538	0.000117698	0.00387636	1.0041	FLI1 /// EWSR1	Friend leukemia virus integration 1 /// Ewing sarcoma breakpoint region 1	nucleotide binding /// RNA binding /// protein binding /// calmodulin binding /// intracellular /// nucleus /// cytoplasm /// plasma membrane /// zinc ion binding /// regulation of transcription /// metal ion binding /// DNA binding /// transcription factor activity /// regulation of transcription, DNA-dependent /// hemostasis /// blood circulation /// organ morphogenesis /// sequence-specific DN…
8102950	-0.908485	0.532744	8.93912	-6.83271	1.39718e-06	0.000124724	5.4094	INPP4B	inositol polyphosphate-4-phosphatase, type II, 105kDa	signal transduction /// phosphatidylinositol-3,4-bisphosphate 4-phosphatase activity /// hydrolase activity /// phosphatidyl-inositol-4,5-bisphosphate 4-phosphatase activity /// phosphatidylinositol-3,4-bisphosphate 4-phosphatase activity
8105040	-0.910695	0.531929	10.5939	-4.37679	0.00030751	0.0080056	0.05574	OSMR	oncostatin M receptor	positive regulation of acute inflammatory response /// receptor activity /// oncostatin-M receptor activity /// oncostatin-M receptor complex /// cell surface receptor linked signaling pathway /// cell proliferation /// positive regulation of cell proliferation /// membrane /// integral to membrane /// growth factor binding /// response to cytokine stimulus /// oncostatin-M receptor activity /// …
8113130	-0.911787	0.531526	9.00622	-9.06905	1.98922e-08	4.35758e-06	9.61643	MCTP1	multiple C2 domains, transmembrane 1	calcium ion binding /// calcium-dependent phospholipid binding /// membrane fraction /// membrane /// integral to membrane /// calcium-mediated signaling
7980233	-0.914175	0.530647	8.42918	-4.87224	9.87875e-05	0.00343354	1.17748	PGF	placental growth factor	angiogenesis /// branching involved in ureteric bud morphogenesis /// response to hypoxia /// positive regulation of endothelial cell proliferation /// protein binding /// extracellular region /// extracellular space /// signal transduction /// cell-cell signaling /// multicellular organismal development /// female pregnancy /// growth factor activity /// heparin binding /// positive regulation o…
8135363	-0.916106	0.529937	8.20078	-5.90251	9.95969e-06	0.000575743	3.45578	PIK3CG	phosphoinositide-3-kinase, catalytic, gamma polypeptide	nucleotide binding /// inositol or phosphatidylinositol kinase activity /// protein binding /// ATP binding /// cytosol /// phosphoinositide 3-kinase complex /// protein amino acid phosphorylation /// G-protein coupled receptor protein signaling pathway /// 1-phosphatidylinositol-3-kinase activity /// transferase activity /// phosphotransferase activity, alcohol group as acceptor /// negative reg…
7968563	-0.917382	0.529469	11.5991	-4.97764	7.77516e-05	0.0028387	1.41468	RFC3	replication factor C (activator 1) 3, 38kDa	nucleotide binding /// DNA synthesis involved in DNA repair /// DNA binding /// DNA clamp loader activity /// protein binding /// ATP binding /// nucleus /// nucleoplasm /// DNA replication factor C complex /// DNA replication factor C complex /// DNA replication /// DNA replication /// DNA strand elongation involved in DNA replication /// nucleotide-excision repair, DNA gap filling /// ATPase ac…
7958960	-0.921667	0.527899	8.94686	-6.52169	2.66083e-06	0.000207004	4.76882	TPCN1	two pore segment channel 1	voltage-gated ion channel activity /// calcium channel activity /// ion transport /// calcium ion transport /// membrane /// integral to membrane /// transmembrane transport /// calcium ion binding
8171381	-0.922717	0.527515	8.40163	-5.80706	1.22592e-05	0.000671372	3.24918	FANCB	Fanconi anemia, complementation group B	nucleus /// DNA repair /// response to DNA damage stimulus
8099107	-0.922893	0.52745	10.3786	-4.52776	0.000217248	0.00612508	0.398352	LYAR	Ly1 antibody reactive homolog (mouse)	protein binding /// nucleus /// nucleolus /// metal ion binding /// nucleolus /// zinc ion binding
8149551	-0.926138	0.526265	9.17236	-4.50101	0.000231026	0.00640506	0.337675	PSD3	pleckstrin and Sec7 domain containing 3	ARF guanyl-nucleotide exchange factor activity /// intracellular /// membrane fraction /// plasma membrane /// postsynaptic density /// cell junction /// regulation of ARF protein signal transduction /// synapse /// postsynaptic membrane
7956819	-0.9286	0.525368	9.31723	-4.93001	8.66273e-05	0.00307837	1.30757	RASSF3	Ras association (RalGDS/AF-6) domain family member 3	protein binding /// cytoplasm /// microtubule /// signal transduction
7948995	-0.930938	0.524517	8.81283	-5.18202	4.90037e-05	0.00200451	1.87245	ATL3	atlastin GTPase 3	nucleotide binding /// GTPase activity /// GTP binding /// endoplasmic reticulum /// endoplasmic reticulum membrane /// ER to Golgi vesicle-mediated transport /// endoplasmic reticulum organization /// membrane /// integral to membrane /// hydrolase activity /// identical protein binding /// protein homooligomerization /// GTPase activity /// integral to membrane
8127502	-0.931906	0.524165	9.44654	-4.44214	0.000264537	0.0071438	0.204084	C6orf155	chromosome 6 open reading frame 155	---
8049542	-0.932891	0.523807	7.0772	-5.44229	2.73805e-05	0.00128046	2.45039	LRRFIP1	leucine rich repeat (in FLII) interacting protein 1	DNA binding /// double-stranded RNA binding /// protein binding /// nucleus /// cytoplasm /// cytoskeleton /// regulation of transcription from RNA polymerase II promoter /// negative regulation of transcription /// transcription repressor activity /// cytoplasm
8124391	-0.934045	0.523389	10.6328	-5.16224	5.12347e-05	0.00207215	1.82828	HIST1H2AB	histone cluster 1, H2ab	nucleosome /// DNA binding /// nucleus /// chromosome /// nucleosome assembly
8154100	-0.936419	0.522528	7.98535	-4.61477	0.000177911	0.00533684	0.595593	VLDLR	very low density lipoprotein receptor	response to hypoxia /// receptor activity /// low-density lipoprotein receptor activity /// calcium ion binding /// protein binding /// extracellular space /// membrane fraction /// nucleus /// plasma membrane /// coated pit /// lipid transport /// endocytosis /// signal transduction /// nervous system development /// response to nutrient /// memory /// steroid metabolic process /// cholesterol m…
8017210	-0.936826	0.522381	10.4691	-5.11987	5.63663e-05	0.00222424	1.73358	AP1S2 /// LOC653653	adaptor-related protein complex 1, sigma 2 subunit /// adaptor-related protein complex 1, sigma 2 subunit pseudogene	protein binding /// Golgi apparatus /// cytosol /// coated pit /// intracellular protein transport /// post-Golgi vesicle-mediated transport /// endocytosis /// protein transporter activity /// membrane /// cellular membrane organization /// AP-type membrane coat adaptor complex /// clathrin coat of trans-Golgi network vesicle /// clathrin adaptor complex /// cytoplasmic vesicle membrane /// cyto…
8023598	-0.940184	0.521166	7.18354	-9.08731	1.92645e-08	4.27633e-06	9.64794	RNF152	ring finger protein 152	protein binding /// zinc ion binding /// metal ion binding
8165735	-0.941009	0.520868	9.11537	-6.18937	5.37077e-06	0.000365707	4.07014	CSF2RA	colony stimulating factor 2 receptor, alpha, low-affinity (granulocyte-macrophage)	receptor activity /// cytokine receptor activity /// protein binding /// extracellular region /// plasma membrane /// integral to plasma membrane /// receptor activity
8176306	-0.941009	0.520868	9.11537	-6.18937	5.37077e-06	0.000365707	4.07014	CSF2RA	colony stimulating factor 2 receptor, alpha, low-affinity (granulocyte-macrophage)	receptor activity /// cytokine receptor activity /// protein binding /// extracellular region /// plasma membrane /// integral to plasma membrane /// receptor activity
8015642	-0.941947	0.52053	9.07134	-5.71639	1.49481e-05	0.000790044	3.05197	MLX /// PSMC3IP	MAX-like protein X /// PSMC3 interacting protein	DNA binding /// transcription factor activity /// nucleus /// cytoplasm /// regulation of transcription, DNA-dependent /// nucleocytoplasmic transport /// transcription factor binding /// protein homodimerization activity /// negative regulation of transcription, DNA-dependent /// DNA binding /// cellular_component /// nucleus /// DNA recombination /// meiosis /// biological_process /// estrogen …
7920877	-0.942053	0.520492	9.6139	-4.70656	0.000144177	0.00452465	0.803377	ARHGEF2	Rho/Rac guanine nucleotide exchange factor (GEF) 2	cell morphogenesis /// guanyl-nucleotide exchange factor activity /// Rho guanyl-nucleotide exchange factor activity /// intracellular /// cytoplasm /// Golgi apparatus /// spindle /// cytosol /// cytoskeleton /// microtubule /// tight junction /// intracellular protein transport /// apoptosis /// actin filament organization /// negative regulation of microtubule depolymerization /// cell cycle /…
8138489	-0.945834	0.519129	9.28132	-7.50125	3.65589e-07	4.36309e-05	6.74087	CDCA7L	cell division cycle associated 7-like	protein binding /// nucleus /// cytoplasm /// positive regulation of cell proliferation /// regulation of transcription /// nucleus
8101828	-0.946677	0.518826	10.0692	-7.66833	2.63976e-07	3.44691e-05	7.06377	TSPAN5	tetraspanin 5	membrane /// integral to membrane
8119974	-0.94698	0.518717	10.9601	-5.93924	9.19731e-06	0.00054465	3.535	SLC29A1	solute carrier family 29 (nucleoside transporters), member 1	nucleoside transmembrane transporter activity /// protein binding /// membrane fraction /// plasma membrane /// integral to plasma membrane /// nucleobase, nucleoside, nucleotide and nucleic acid metabolic process /// transport /// nucleoside transport /// nucleoside transmembrane transporter activity /// nucleoside transport /// membrane
8145365	-0.947144	0.518658	10.4991	-4.50786	0.000227419	0.0063367	0.353204	DOCK5	dedicator of cytokinesis 5	guanyl-nucleotide exchange factor activity /// cytoplasm /// cytoplasm
7959777	-0.947851	0.518404	10.3423	-6.92081	1.16688e-06	0.00010733	5.58844	BRI3BP	BRI3 binding protein	membrane /// integral to membrane
8144378	-0.94897	0.518002	10.2955	-5.37224	3.20021e-05	0.00145109	2.29546	AGPAT5	1-acylglycerol-3-phosphate O-acyltransferase 5 (lysophosphatidic acid acyltransferase, epsilon)	1-acylglycerol-3-phosphate O-acyltransferase activity /// cellular_component /// mitochondrion /// cytosol /// metabolic process /// acyltransferase activity /// phospholipid biosynthetic process /// membrane /// integral to membrane /// transferase activity /// phospholipid:diacylglycerol acyltransferase activity
8075310	-0.949171	0.51793	9.11665	-4.94609	8.35209e-05	0.00300966	1.34375	LIF /// MGC20647	leukemia inhibitory factor (cholinergic differentiation factor) /// hypothetical protein MGC20647	cytokine activity /// leukemia inhibitory factor receptor binding /// leukemia inhibitory factor receptor binding /// extracellular region /// extracellular space /// immune response /// multicellular organismal development /// embryo implantation /// growth factor activity /// positive regulation of cell proliferation /// stem cell maintenance /// organ regeneration /// positive regulation of pe…
7930927	-0.950094	0.517599	8.91766	-8.02147	1.34272e-07	2.01637e-05	7.73321	INPP5F	inositol polyphosphate-5-phosphatase F	hydrolase activity
8018352	-0.951361	0.517144	8.3635	-5.8851	1.03435e-05	0.000591764	3.41818	SLC25A19	solute carrier family 25 (mitochondrial thiamine pyrophosphate carrier), member 19	transporter activity /// binding /// mitochondrion /// mitochondrial inner membrane /// membrane /// integral to membrane /// deoxynucleotide transmembrane transporter activity /// deoxynucleotide transport /// transmembrane transport /// transport
8160521	-0.951553	0.517076	8.17069	-6.08124	6.77038e-06	0.000436886	3.83975	MOBKL2B	MOB1, Mps One Binder kinase activator-like 2B (yeast)	protein binding /// metal ion binding /// zinc ion binding
7936115	-0.95518	0.515777	7.74761	-5.64735	1.7396e-05	0.000887037	2.90119	SH3PXD2A	SH3 and PX domains 2A	podosome /// protein binding /// cytoplasm /// cell communication /// phosphoinositide binding /// cell projection /// protein binding
8068478	-0.956474	0.515315	10.1772	-5.76399	1.34684e-05	0.000725657	3.15563	CHAF1B	chromatin assembly factor 1, subunit B (p60)	chromatin binding /// protein binding /// nucleus /// nucleus /// nucleoplasm /// chromatin assembly complex /// cytoplasm /// mitochondrion /// cytosol /// DNA replication /// DNA repair /// DNA replication-dependent nucleosome assembly /// protein complex assembly /// cell cycle /// histone binding /// regulation of transcription /// unfolded protein binding /// response to DNA damage stimulus
8092640	-0.967304	0.511461	10.9132	-5.87706	1.05257e-05	0.00059706	3.40081	RFC4	replication factor C (activator 1) 4, 37kDa	nucleotide binding /// DNA clamp loader activity /// protein binding /// ATP binding /// nucleus /// nucleoplasm /// DNA replication factor C complex /// DNA replication /// DNA replication /// DNA strand elongation involved in DNA replication /// DNA repair /// nucleotide-excision repair, DNA gap filling /// nucleoside-triphosphatase activity /// phosphoinositide-mediated signaling /// DNA stran…
7969204	-0.967457	0.511407	9.34996	-9.04624	2.0706e-08	4.41954e-06	9.57703	WDFY2	WD repeat and FYVE domain containing 2	zinc ion binding /// metal ion binding
7963280	-0.968401	0.511072	10.9765	-6.47344	2.94386e-06	0.00022482	4.66828	SMAGP /// SMAGP	small trans-membrane and glycosylated protein /// small cell adhesion glycoprotein	plasma membrane /// integral to membrane /// cytoplasmic vesicle membrane /// cytoplasmic vesicle
8005235	-0.969253	0.51077	9.01646	-5.87979	1.04635e-05	0.000594547	3.4067	MPRIP	myosin phosphatase Rho interacting protein	actin binding /// protein binding /// cytoplasm /// cytoskeleton
8179228	-0.970186	0.51044	9.5564	-6.04185	7.36908e-06	0.000464712	3.75545	TCF19	transcription factor 19	transcription factor activity /// protein binding /// nucleus /// regulation of transcription from RNA polymerase II promoter /// zinc ion binding /// cell proliferation /// regulation of transcription /// metal ion binding
8122202	-0.970828	0.510213	6.50246	-5.25971	4.11588e-05	0.00174804	2.0456	MYB	v-myb myeloblastosis viral oncogene homolog (avian)	DNA binding /// protein binding /// nucleus /// regulation of transcription, DNA-dependent /// nuclear matrix /// transcription activator activity
8085145	-0.972342	0.509678	11.0334	-5.82288	1.18432e-05	0.000655058	3.28351	RAD18	RAD18 homolog (S. cerevisiae)	Y-form DNA binding /// chromatin /// damaged DNA binding /// protein binding /// nucleus /// replication fork /// DNA repair /// zinc ion binding /// ligase activity /// ubiquitin protein ligase binding /// metal ion binding /// response to DNA damage stimulus /// modification-dependent protein catabolic process
8111153	-0.973214	0.50937	11.0926	-8.76304	3.42481e-08	6.40651e-06	9.08197	MYO10	myosin X	nucleotide binding /// motor activity /// actin binding /// ATP binding /// cytoskeleton /// signal transduction /// myosin complex
8129804	-0.977805	0.507752	8.3207	-7.50535	3.62662e-07	4.3483e-05	6.74885	MAP3K5	mitogen-activated protein kinase kinase kinase 5	MAPKKK cascade /// nucleotide binding /// magnesium ion binding /// protein serine/threonine kinase activity /// MAP kinase kinase kinase activity /// protein binding /// ATP binding /// apoptosis /// activation of JUN kinase activity /// induction of apoptosis by extracellular signals /// caspase activator activity /// transferase activity /// identical protein binding /// protein homodimerizati…
8131803	-0.980728	0.506724	6.62515	-4.43021	0.000271904	0.00730716	0.177009	IL6	interleukin 6 (interferon, beta 2)	neutrophil apoptosis /// hepatic immune response /// hepatic immune response /// neutrophil mediated immunity /// monocyte chemotaxis /// positive regulation of acute inflammatory response /// positive regulation of leukocyte chemotaxis /// cytokine activity /// cytokine activity /// interleukin-6 receptor binding /// interleukin-6 receptor binding /// extracellular region /// extracellular space…
8107100	-0.982399	0.506137	9.05015	-10.4462	1.98193e-09	6.59922e-07	11.87	RGMB	RGM domain family, member B	ER-Golgi intermediate compartment /// plasma membrane /// cell adhesion /// signal transduction /// BMP signaling pathway /// identical protein binding /// membrane raft /// positive regulation of transcription /// anchored to plasma membrane
8020468	-0.987421	0.504379	10.5456	-6.68773	1.88351e-06	0.000157106	5.11244	RBBP8	retinoblastoma binding protein 8	cell cycle checkpoint /// protein binding /// nucleus /// DNA repair /// regulation of transcription from RNA polymerase II promoter /// nucleus
7984588	-0.988158	0.504121	8.00169	-7.54107	3.3817e-07	4.13972e-05	6.8182	THSD4	thrombospondin, type I, domain containing 4	metalloendopeptidase activity /// extracellular region /// proteinaceous extracellular matrix /// peptidase activity
8122807	-0.990545	0.503288	9.59477	-9.63002	7.56978e-09	2.01641e-06	10.5637	AKAP12	A kinase (PRKA) anchor protein 12	nucleus /// cytoplasm /// cytoskeleton /// plasma membrane /// cell cortex /// protein targeting /// signal transduction /// G-protein coupled receptor protein signaling pathway /// adenylate cyclase binding /// positive regulation of protein kinase A signaling cascade /// positive regulation of cAMP biosynthetic process /// protein kinase A binding /// cytoplasm
8097857	-0.991665	0.502897	9.02878	-7.71932	2.39179e-07	3.17288e-05	7.16153	MND1	meiotic nuclear divisions 1 homolog (S. cerevisiae)	DNA binding /// protein binding /// nucleus /// DNA recombination /// meiosis
[truncated: 221 more rows]
