# Supplementary material for: Suppression of IFN-Induced Transcription Underlies IFN Defects Generated by Activated Ras/MEK in Human Cancer Cells
Source: PLoS One. 2012 Sep 7;7(9):e44267. doi: 10.1371/journal.pone.0044267 (PMC3436881; doi:10.1371/journal.pone.0044267)
Supplement: File S6 — Differentially expressed genes in HT1080 cells treated with IFN and U0126 for 12 h compared to vehicle treated controls (FDR <0.01). (XLS) [file pone.0044267.s011.xls]

## Sheet: UI12_HGNC
ID	logFC	FC	AveExpr	t	P.Value	adj.P.Val	B	Gene Symbol	Gene Title	GO Description
7902541	5.78231	55.0362	8.24287	15.7638	1.48718e-12	1.72859e-09	18.6568	IFI44L	interferon-induced protein 44-like	cytoplasm /// immune response
8068697	5.52696	46.1084	8.63175	17.6302	1.92472e-13	4.37539e-10	20.4868	MX2	myxovirus (influenza virus) resistance 2 (mouse)	nucleotide binding /// GTPase activity /// GTP binding /// nucleus /// cytoplasm /// defense response /// response to virus /// GTPase activity /// cytoplasm
8101126	5.44444	43.545	6.6705	17.2908	2.7511e-13	5.38844e-10	20.1711	CXCL10	chemokine (C-X-C motif) ligand 10	receptor binding /// extracellular region /// extracellular space /// chemotaxis /// inflammatory response /// immune response /// signal transduction /// cell surface receptor linked signaling pathway /// G-protein coupled receptor protein signaling pathway /// cell-cell signaling /// muscle organ development /// chemokine activity /// blood circulation /// positive regulation of cell proliferat…
8040080	5.21556	37.1571	9.14905	8.50252	5.4899e-08	1.15694e-05	8.61669	RSAD2	radical S-adenosyl methionine domain containing 2	molecular_function /// catalytic activity /// endoplasmic reticulum /// endoplasmic reticulum membrane /// Golgi apparatus /// membrane /// regulation of ossification /// metal ion binding /// iron-sulfur cluster binding /// defense response to virus /// iron ion binding
7937335	5.05549	33.2549	9.81198	21.1369	6.63393e-15	4.4178e-11	23.3684	IFITM1	interferon induced transmembrane protein 1 (9-27)	receptor signaling protein activity /// protein binding /// plasma membrane /// cell surface receptor linked signaling pathway /// negative regulation of cell proliferation /// response to biotic stimulus /// integral to membrane /// cell surface receptor linked signal transduction
7958913	4.80494	27.9531	9.96456	12.615	7.89078e-11	4.60946e-08	14.966	OAS2	2'-5'-oligoadenylate synthetase 2, 69/71kDa	nucleotide binding /// 2'-5'-oligoadenylate synthetase activity /// RNA binding /// ATP binding /// nucleus /// mitochondrion /// endoplasmic reticulum /// microsome /// nucleobase, nucleoside, nucleotide and nucleic acid metabolic process /// RNA catabolic process /// immune response /// membrane /// transferase activity /// nucleotidyltransferase activity /// microsome
8068713	4.72224	26.3959	9.45938	18.7294	6.30362e-14	2.33213e-10	21.4616	MX1	myxovirus (influenza virus) resistance 1, interferon-inducible protein p78 (mouse)	nucleotide binding /// GTPase activity /// protein binding /// GTP binding /// cytoplasm /// cytosol /// induction of apoptosis /// defense response /// signal transduction /// response to virus /// GTP binding
7929065	4.63989	24.9314	11.0389	7.44643	4.07147e-07	6.58096e-05	6.63375	IFIT1	interferon-induced protein with tetratricopeptide repeats 1	molecular_function /// binding /// cytoplasm /// biological_process
7958884	4.34567	20.3318	10.258	15.8406	1.36166e-12	1.67923e-09	18.7368	OAS1	2',5'-oligoadenylate synthetase 1, 40/46kDa	nucleotide binding /// RNA binding /// ATP binding /// nucleus /// cytoplasm /// mitochondrion /// endoplasmic reticulum /// microsome /// nucleobase, nucleoside, nucleotide and nucleic acid metabolic process /// immune response /// transferase activity /// nucleotidyltransferase activity
8092169	4.20898	18.4939	6.35624	12.0812	1.67321e-10	8.98526e-08	14.251	TNFSF10	tumor necrosis factor (ligand) superfamily, member 10	receptor binding /// cytokine activity /// tumor necrosis factor receptor binding /// protein binding /// extracellular region /// extracellular space /// soluble fraction /// integral to plasma membrane /// induction of apoptosis /// immune response /// signal transduction /// cell-cell signaling /// activation of pro-apoptotic gene products /// membrane /// positive regulation of I-kappaB kinas…
8140971	3.84526	14.3727	9.86745	13.2296	3.42458e-11	2.37559e-08	15.7546	SAMD9L	sterile alpha motif domain containing 9-like	---
8074606	3.75626	13.5129	10.6712	16.1166	9.94743e-13	1.44009e-09	19.021	USP18 /// USP41	ubiquitin specific peptidase 18 /// ubiquitin specific peptidase 41	ubiquitin thiolesterase activity /// ubiquitin-specific protease activity /// nucleus /// ubiquitin-dependent protein catabolic process /// peptidase activity /// cysteine-type peptidase activity /// nucleus
7929047	3.69059	12.9116	8.50408	6.20324	5.21415e-06	0.000538278	4.09911	IFIT2	interferon-induced protein with tetratricopeptide repeats 2	molecular_function /// binding /// cellular_component /// biological_process
8090018	3.61325	12.2376	9.63711	18.0759	1.21517e-13	3.67831e-10	20.8907	PARP9	poly (ADP-ribose) polymerase family, member 9	NAD+ ADP-ribosyltransferase activity /// protein binding /// nucleus /// nucleus /// cytoplasm /// cell migration /// transferase activity /// molecular_function
8071155	3.6027	12.1484	9.72424	20.3647	1.32996e-14	7.3806e-11	22.7884	USP18	ubiquitin specific peptidase 18	ubiquitin thiolesterase activity /// ubiquitin-specific protease activity /// nucleus /// ubiquitin-dependent protein catabolic process /// peptidase activity /// cysteine-type peptidase activity /// nucleus
8056285	3.51818	11.4572	8.66255	14.297	8.63598e-12	7.01347e-09	17.0419	IFIH1	interferon induced with helicase C domain 1	nucleotide binding /// DNA binding /// RNA binding /// helicase activity /// protein binding /// ATP binding /// intracellular /// nucleus /// cytoplasm /// zinc ion binding /// response to virus /// hydrolase activity /// regulation of apoptosis /// interspecies interaction between organisms /// innate immune response /// metal ion binding
8004184	3.42271	10.7236	7.42171	17.8204	1.57978e-13	4.37539e-10	20.6606	XAF1	XIAP associated factor 1	nucleus /// cytoplasm /// mitochondrion /// apoptosis /// zinc ion binding /// metal ion binding
7929052	3.34204	10.1404	8.46965	8.62797	4.36927e-08	9.69891e-06	8.84186	IFIT3	interferon-induced protein with tetratricopeptide repeats 3	molecular_function /// binding /// cellular_component /// biological_process
8086125	3.3288	10.0478	8.64445	14.2648	8.99078e-12	7.12776e-09	17.0045	LBA1 /// TRANK1	lupus brain antigen 1 /// tetratricopeptide repeat and ankyrin repeat containing 1	DNA binding /// ATP-dependent DNA helicase activity /// binding /// ATP binding /// DNA repair
7914127	3.25372	9.53824	12.0912	6.51857	2.67824e-06	0.00030026	4.7619	IFI6	interferon, alpha-inducible protein 6	release of cytochrome c from mitochondria /// protein binding /// mitochondrion /// anti-apoptosis /// immune response /// membrane /// integral to membrane /// negative regulation of caspase activity /// negative regulation of mitochondrial depolarization
8098611	3.16875	8.99267	9.48358	15.5315	1.9462e-12	2.16008e-09	18.4121	TLR3	toll-like receptor 3	microglial cell activation during immune response /// double-stranded RNA binding /// double-stranded RNA binding /// receptor activity /// transmembrane receptor activity /// protein binding /// cytoplasm /// endosome /// endoplasmic reticulum /// endoplasmic reticulum membrane /// integral to plasma membrane /// hyperosmotic response /// signal transduction /// activation of NF-kappaB-inducing …
7921434	3.13488	8.78404	8.94101	10.703	1.32019e-09	5.17159e-07	12.2642	AIM2	absent in melanoma 2	protein binding /// nucleus /// immune response
7917530	3.12789	8.74158	7.64158	9.54868	8.68777e-09	2.49376e-06	10.4289	---	---	---
7902553	2.98948	7.9419	9.55848	5.07805	6.19468e-05	0.00437928	1.63936	IFI44	interferon-induced protein 44	cytoplasm /// response to virus
8136388	2.9715	7.84354	7.82531	19.1547	4.15781e-14	1.97775e-10	21.8202	TMEM140	transmembrane protein 140	membrane /// integral to membrane
8082100	2.96576	7.81237	10.4134	22.1444	2.77086e-15	4.4178e-11	24.0843	PARP14	poly (ADP-ribose) polymerase family, member 14	NAD+ ADP-ribosyltransferase activity /// nucleus /// cytoplasm /// plasma membrane /// transferase activity, transferring glycosyl groups /// regulation of transcription /// protein binding /// cytoplasm
7976443	2.9654	7.81044	9.90699	6.56037	2.45427e-06	0.000278907	4.84876	IFI27	interferon, alpha-inducible protein 27	molecular_function /// biological_process /// membrane /// integral to membrane
8084732	2.9329	7.63644	7.27484	11.5807	3.46705e-10	1.60337e-07	13.5536	RTP4	receptor (chemosensory) transporter protein 4	detection of chemical stimulus involved in sensory perception of bitter taste /// protein binding /// cytoplasm /// protein targeting to membrane /// membrane /// integral to membrane
8140967	2.89615	7.44438	10.3795	12.1597	1.49589e-10	8.16533e-08	14.3578	SAMD9	sterile alpha motif domain containing 9	cytoplasm
8103601	2.89547	7.44084	9.29266	17.6218	1.94169e-13	4.37539e-10	20.4791	DDX60L	DEAD (Asp-Glu-Ala-Asp) box polypeptide 60-like	nucleotide binding /// RNA binding /// helicase activity /// ATP binding /// ATP-dependent helicase activity /// hydrolase activity
7958895	2.85445	7.23229	9.90453	15.3159	2.50602e-12	2.60759e-09	18.1814	OAS3	2'-5'-oligoadenylate synthetase 3, 100kDa	nucleotide binding /// RNA binding /// ATP binding /// microsome /// nucleobase, nucleoside, nucleotide and nucleic acid metabolic process /// immune response /// transferase activity /// nucleotidyltransferase activity
8160559	2.83695	7.14509	10.3778	8.23457	9.00104e-08	1.77342e-05	8.12846	DDX58	DEAD (Asp-Glu-Ala-Asp) box polypeptide 58	nucleotide binding /// positive regulation of defense response to virus by host /// RNA binding /// helicase activity /// protein binding /// ATP binding /// cytoplasm /// ATP-dependent helicase activity /// zinc ion binding /// response to virus /// hydrolase activity /// positive regulation of interferon-alpha production /// positive regulation of interferon-beta production /// innate immune re…
8059650	2.73825	6.67263	10.1086	26.9773	6.63784e-17	2.2102e-12	26.9753	SP110	SP110 nuclear body protein	DNA binding /// hematopoietin/interferon-class (D200-domain) cytokine receptor signal transducer activity /// protein binding /// nucleus /// zinc ion binding /// interspecies interaction between organisms /// regulation of transcription /// metal ion binding /// DNA binding /// nucleus
7964119	2.71411	6.56187	9.71136	15.7531	1.50551e-12	1.72859e-09	18.6457	STAT2	signal transducer and activator of transcription 2, 113kDa	transcription factor activity /// signal transducer activity /// hematopoietin/interferon-class (D200-domain) cytokine receptor signal transducer activity /// calcium ion binding /// protein binding /// nucleus /// cytoplasm /// regulation of transcription from RNA polymerase II promoter /// signal transduction /// JAK-STAT cascade /// response to virus /// interspecies interaction between organi…
7917516	2.69171	6.4608	10.9224	16.2411	8.64697e-13	1.30872e-09	19.1474	GBP3 /// GBP1	guanylate binding protein 3 /// guanylate binding protein 1, interferon-inducible, 67kDa	nucleotide binding /// GTPase activity /// GTP binding /// plasma membrane /// membrane /// integral to membrane /// immune response /// GTP binding
8103563	2.66972	6.36305	9.61208	7.87354	1.77862e-07	3.13347e-05	7.45468	DDX60	DEAD (Asp-Glu-Ala-Asp) box polypeptide 60	nucleotide binding /// RNA binding /// helicase activity /// ATP binding /// ATP-dependent helicase activity /// hydrolase activity
8046003	2.59704	6.05046	6.82925	11.8863	2.21598e-10	1.13516e-07	13.9825	GCA	grancalcin, EF-hand calcium binding protein	calcium ion binding /// cytoplasm /// plasma membrane /// cellular membrane fusion /// protein homodimerization activity /// calcium ion binding /// cytoplasm /// membrane fusion
8015511	2.59697	6.05016	8.5511	12.7624	6.44092e-11	3.89933e-08	15.1584	DHX58	DEXH (Asp-Glu-X-His) box polypeptide 58	nucleotide binding /// DNA binding /// RNA binding /// helicase activity /// protein binding /// ATP binding /// cytoplasm /// zinc ion binding /// hydrolase activity /// innate immune response /// metal ion binding /// ATP-dependent helicase activity
8101131	2.59283	6.0328	5.94756	8.55588	4.98062e-08	1.07688e-05	8.71273	CXCL11	chemokine (C-X-C motif) ligand 11	extracellular region /// extracellular space /// chemotaxis /// inflammatory response /// immune response /// signal transduction /// G-protein coupled receptor protein signaling pathway /// cell-cell signaling /// chemokine activity /// extracellular region /// chemotaxis /// inflammatory response /// chemokine activity
8025551	2.57773	5.97001	9.39022	21.6095	4.38402e-15	4.4178e-11	23.7098	C19orf66 /// ANGPTL6	chromosome 19 open reading frame 66 /// angiopoietin-like 6	angiogenesis /// receptor binding /// extracellular region /// extracellular space /// signal transduction /// multicellular organismal development /// secretory granule /// cell differentiation
8096335	2.53986	5.81533	9.84174	14.6829	5.35927e-12	4.46119e-09	17.4833	HERC6	hect domain and RLD 6	intracellular /// cytoplasm /// cytosol /// protein modification process /// ligase activity /// acid-amino acid ligase activity /// modification-dependent protein catabolic process
8007446	2.52835	5.76911	10.689	13.9431	1.35039e-11	1.02191e-08	16.6262	IFI35	interferon-induced protein 35	protein binding /// nucleus /// immune response /// response to virus
8129666	2.52758	5.76604	8.22952	8.68436	3.94573e-08	8.8771e-06	8.94235	SLC2A12	solute carrier family 2 (facilitated glucose transporter), member 12	transporter activity /// cytoplasm /// carbohydrate transport /// endomembrane system /// membrane /// integral to membrane /// substrate-specific transmembrane transporter activity /// perinuclear region of cytoplasm /// transmembrane transport
8096361	2.49868	5.65167	6.96674	11.838	2.37709e-10	1.19924e-07	13.9154	HERC5	hect domain and RLD 5	regulation of cyclin-dependent protein kinase activity /// intracellular /// cytoplasm /// protein modification process /// ligase activity /// acid-amino acid ligase activity /// perinuclear region of cytoplasm /// modification-dependent protein catabolic process
8050102	2.4615	5.50789	9.08263	12.8676	5.57832e-11	3.50456e-08	15.2944	CMPK2	cytidine monophosphate (UMP-CMP) kinase 2, mitochondrial	nucleotide binding /// cytidylate kinase activity /// ATP binding /// mitochondrion /// pyrimidine nucleotide biosynthetic process /// kinase activity /// transferase activity
7917532	2.43465	5.40635	7.61207	10.0687	3.64961e-09	1.16847e-06	11.2762	GBP2	guanylate binding protein 2, interferon-inducible	nucleotide binding /// GTPase activity /// GTP binding /// plasma membrane /// immune response /// GTP binding
8041422	2.43438	5.40532	6.07599	15.3787	2.32737e-12	2.49982e-09	18.2489	RASGRP3	RAS guanyl releasing protein 3 (calcium and DAG-regulated)	MAPKKK cascade /// signal transducer activity /// Ras guanyl-nucleotide exchange factor activity /// calcium ion binding /// protein binding /// intracellular /// cytoplasm /// integral to plasma membrane /// small GTPase mediated signal transduction /// Ras protein signal transduction /// Ras GTPase binding /// kinase binding /// diacylglycerol binding /// guanyl-nucleotide exchange factor compl…
8117034	2.43162	5.39498	8.09345	5.27048	4.01771e-05	0.00301982	2.06898	GMPR	guanosine monophosphate reductase	GMP reductase activity /// nucleotide metabolic process /// response to cold /// oxidoreductase activity /// metal ion binding /// oxidation reduction /// GMP reductase activity /// response to cold /// potassium ion binding
8125512	2.42574	5.37306	10.2463	16.3367	7.77006e-13	1.232e-09	19.2437	TAP1	transporter 1, ATP-binding cassette, sub-family B (MDR/TAP)	nucleotide binding /// transporter activity /// protein binding /// ATP binding /// endoplasmic reticulum /// endoplasmic reticulum lumen /// endoplasmic reticulum membrane /// cytosol /// protein complex assembly /// intracellular protein transport /// defense response /// immune response /// peptide transporter activity /// peptide antigen-transporting ATPase activity /// peptide transport /// …
8178867	2.42574	5.37306	10.2463	16.3367	7.77006e-13	1.232e-09	19.2437	TAP1	transporter 1, ATP-binding cassette, sub-family B (MDR/TAP)	nucleotide binding /// transporter activity /// protein binding /// ATP binding /// endoplasmic reticulum /// endoplasmic reticulum lumen /// endoplasmic reticulum membrane /// cytosol /// protein complex assembly /// intracellular protein transport /// defense response /// immune response /// peptide transporter activity /// peptide antigen-transporting ATPase activity /// peptide transport /// …
8180061	2.42574	5.37306	10.2463	16.3367	7.77006e-13	1.232e-09	19.2437	TAP1	transporter 1, ATP-binding cassette, sub-family B (MDR/TAP)	nucleotide binding /// transporter activity /// protein binding /// ATP binding /// endoplasmic reticulum /// endoplasmic reticulum lumen /// endoplasmic reticulum membrane /// cytosol /// protein complex assembly /// intracellular protein transport /// defense response /// immune response /// peptide transporter activity /// peptide antigen-transporting ATPase activity /// peptide transport /// …
8072710	2.40858	5.30952	8.92731	21.1672	6.45864e-15	4.4178e-11	23.3906	APOL6	apolipoprotein L, 6	lipid transporter activity /// extracellular region /// cytoplasm /// lipid transport /// lipid binding /// lipoprotein metabolic process
8072735	2.38129	5.21003	8.77213	7.80621	2.02339e-07	3.54594e-05	7.32698	APOL1	apolipoprotein L, 1	chloride channel activity /// protein binding /// extracellular region /// extracellular space /// chloride transport /// lipid transport /// steroid metabolic process /// cholesterol metabolic process /// lipid binding /// cytolysis /// intrinsic to membrane /// killing of cells of another organism /// very-low-density lipoprotein particle /// high-density lipoprotein particle /// lipoprotein me…
8101701	2.32701	5.01765	7.42685	12.0701	1.70007e-10	8.98526e-08	14.2358	PPM1K /// PPM1K	protein phosphatase 1K (PP2C domain containing) /// protein phosphatase, Mg2+/Mn2+ dependent, 1K	protein serine/threonine phosphatase activity /// mitochondrion /// mitochondrial matrix /// protein amino acid dephosphorylation /// protein serine/threonine phosphatase complex /// hydrolase activity /// metal ion binding /// magnesium ion binding /// manganese ion binding
8057744	2.32173	4.99932	11.7389	18.8023	5.86619e-14	2.33213e-10	21.5238	STAT1	signal transducer and activator of transcription 1, 91kDa	DNA binding /// transcription factor activity /// signal transducer activity /// hematopoietin/interferon-class (D200-domain) cytokine receptor signal transducer activity /// calcium ion binding /// protein binding /// nucleus /// nucleolus /// cytoplasm /// regulation of transcription, DNA-dependent /// transcription from RNA polymerase II promoter /// induction of apoptosis /// activation of ca…
8143327	2.31543	4.97752	9.6452	17.5458	2.10248e-13	4.37539e-10	20.4089	PARP12	poly (ADP-ribose) polymerase family, member 12	nucleic acid binding /// NAD+ ADP-ribosyltransferase activity /// nucleus /// zinc ion binding /// transferase activity /// metal ion binding
7938035	2.25066	4.75902	9.72737	11.6362	3.19412e-10	1.49795e-07	13.6323	TRIM22	tripartite motif-containing 22	transcription factor activity /// transcription corepressor activity /// protein binding /// intracellular /// nucleus /// cytoplasm /// Golgi apparatus /// regulation of transcription, DNA-dependent /// immune response /// zinc ion binding /// response to virus /// Cajal body /// nuclear speck /// ligase activity /// intracellular membrane-bounded organelle /// interspecies interaction between o…
8035304	2.15683	4.45933	7.39655	6.80449	1.4805e-06	0.000190301	5.35142	BST2 /// BST2	bone marrow stromal cell antigen 2 /// bone marrow stromal cell antigen 2	signal transducer activity /// Golgi apparatus /// plasma membrane /// integral to plasma membrane /// humoral immune response /// cell-cell signaling /// multicellular organismal development /// cell proliferation /// response to virus /// anchored to membrane /// B cell activation /// positive regulation of I-kappaB kinase/NF-kappaB cascade /// Golgi apparatus /// plasma membrane
8040103	2.15552	4.45528	9.49687	9.0866	1.92888e-08	5.01764e-06	9.64663	ID2	inhibitor of DNA binding 2, dominant negative helix-loop-helix protein	negative regulation of transcription from RNA polymerase II promoter /// chromatin /// protein binding /// nucleus /// cytoplasm /// cytosol /// multicellular organismal development /// heart development /// positive regulation of cell proliferation /// negative regulation of transcription /// transcription repressor activity /// enucleate erythrocyte differentiation /// negative regulation of tr…
7953603	2.09773	4.28037	7.76813	7.77366	2.15399e-07	3.75505e-05	7.26502	C1S	complement component 1, s subcomponent	serine-type endopeptidase activity /// calcium ion binding /// extracellular region /// proteolysis /// complement activation, classical pathway /// peptidase activity /// glial cell differentiation /// innate immune response /// response to cAMP
8082075	2.09595	4.27509	10.884	14.7076	5.20027e-12	4.43983e-09	17.5111	DTX3L /// PARP9	deltex 3-like (Drosophila) /// poly (ADP-ribose) polymerase family, member 9	NAD+ ADP-ribosyltransferase activity /// protein binding /// nucleus /// nucleus /// cytoplasm /// cell migration /// transferase activity /// ubiquitin-protein ligase activity /// response to DNA damage stimulus /// zinc ion binding /// histone monoubiquitination /// chromatin modification /// ligase activity /// histone binding /// metal ion binding /// protein binding
8156688	2.08891	4.25427	9.10282	18.3486	9.21665e-14	3.06887e-10	21.1319	TDRD7	tudor domain containing 7	nucleic acid binding /// protein binding /// cytoplasm /// mitochondrial matrix /// germ cell development /// chromatoid body /// P granule /// protein N-terminus binding /// cytoplasm /// ribonucleoprotein complex
8141843	2.08483	4.24225	6.94298	6.58026	2.35454e-06	0.000270309	4.89003	LOC100286937 /// RASA4	similar to HSPC047 protein /// RAS p21 protein activator 4	GTPase activator activity /// intracellular /// cytoplasm /// cytosol /// plasma membrane /// metal ion binding /// regulation of small GTPase mediated signal transduction /// intracellular signaling cascade /// zinc ion binding
8118571	2.0666	4.18898	9.75956	15.082	3.3082e-12	3.05981e-09	17.9271	PSMB9	proteasome (prosome, macropain) subunit, beta type, 9 (large multifunctional peptidase 2)	proteasome complex /// threonine-type endopeptidase activity /// nucleus /// cytoplasm /// proteasome core complex /// immune response /// peptidase activity /// antigen processing and presentation /// anaphase-promoting complex-dependent proteasomal ubiquitin-dependent protein catabolic process /// interspecies interaction between organisms /// negative regulation of ubiquitin-protein ligase act…
8178211	2.0666	4.18898	9.75956	15.082	3.3082e-12	3.05981e-09	17.9271	PSMB9	proteasome (prosome, macropain) subunit, beta type, 9 (large multifunctional peptidase 2)	proteasome complex /// threonine-type endopeptidase activity /// nucleus /// cytoplasm /// proteasome core complex /// immune response /// peptidase activity /// antigen processing and presentation /// anaphase-promoting complex-dependent proteasomal ubiquitin-dependent protein catabolic process /// interspecies interaction between organisms /// negative regulation of ubiquitin-protein ligase act…
8179495	2.0666	4.18898	9.75956	15.082	3.3082e-12	3.05981e-09	17.9271	PSMB9	proteasome (prosome, macropain) subunit, beta type, 9 (large multifunctional peptidase 2)	proteasome complex /// threonine-type endopeptidase activity /// nucleus /// cytoplasm /// proteasome core complex /// immune response /// peptidase activity /// antigen processing and presentation /// anaphase-promoting complex-dependent proteasomal ubiquitin-dependent protein catabolic process /// interspecies interaction between organisms /// negative regulation of ubiquitin-protein ligase act…
7917576	2.0484	4.13646	5.81762	9.53072	8.95708e-09	2.54909e-06	10.3991	GBP5	guanylate binding protein 5	nucleotide binding /// GTPase activity /// GTP binding /// plasma membrane /// immune response
7973618	2.03325	4.09326	9.63831	10.8624	1.02953e-09	4.13017e-07	12.5049	IRF9	interferon regulatory factor 9	transcription factor activity /// protein binding /// nucleus /// cytoplasm /// regulation of transcription, DNA-dependent /// transcription from RNA polymerase II promoter /// cell surface receptor linked signaling pathway /// response to virus /// identical protein binding /// type I interferon biosynthetic process /// transcription factor activity /// nucleus /// cytoplasm /// cell surface rec…
8066117	1.92868	3.80707	10.489	10.0621	3.68885e-09	1.16979e-06	11.2657	C20orf118 /// SAMHD1	chromosome 20 open reading frame 118 /// SAM domain and HD domain 1	intracellular /// nucleus /// immune response /// hydrolase activity /// regulation of innate immune response /// defense response to virus /// catalytic activity
7929072	1.90326	3.74058	9.3248	11.2326	5.83714e-10	2.60466e-07	13.0527	IFIT5	interferon-induced protein with tetratricopeptide repeats 5	molecular_function /// binding /// cellular_component /// biological_process
8047926	1.85789	3.62476	6.50277	6.30777	4.17498e-06	0.000444135	4.32025	MAP2	microtubule-associated protein 2	microtubule bundle formation /// structural molecule activity /// calmodulin binding /// intracellular /// cytoplasm /// cytoskeleton /// microtubule /// microtubule associated complex /// negative regulation of microtubule depolymerization /// dendrite development /// peptidyl-threonine phosphorylation /// rough microsome /// smooth microsome /// neuronal cell body /// dendritic shaft
8117476	1.84619	3.59549	8.53798	12.5608	8.50687e-11	4.88367e-08	14.8947	BTN3A3	butyrophilin, subfamily 3, member A3	membrane /// integral to membrane
7945962	1.84607	3.5952	9.76545	8.76981	3.38347e-08	7.99002e-06	9.0938	TRIM21	tripartite motif-containing 21	DNA binding /// RNA binding /// protein binding /// intracellular /// nucleus /// cytoplasm /// zinc ion binding /// ribonucleoprotein complex /// metal ion binding /// protein trimerization /// nucleus /// cytoplasm /// ribonucleoprotein complex
8067680	1.84347	3.58872	8.67296	13.8589	1.50416e-11	1.11298e-08	16.5256	PRIC285	peroxisomal proliferator-activated receptor A interacting complex 285	nucleotide binding /// DNA binding /// transcription coactivator activity /// RNA binding /// helicase activity /// ribonuclease activity /// ATP binding /// intracellular /// nucleus /// zinc ion binding /// hydrolase activity /// regulation of transcription /// metal ion binding
8055702	1.83549	3.56893	9.68193	16.9598	3.92135e-13	7.25385e-10	19.8561	NMI	N-myc (and STAT) interactor	transcription cofactor activity /// protein binding /// cytoplasm /// transcription from RNA polymerase II promoter /// inflammatory response /// JAK-STAT cascade
7969129	1.82158	3.53467	8.09759	10.1589	3.14927e-09	1.02805e-06	11.4198	PHF11	PHD finger protein 11	protein binding /// nucleus /// zinc ion binding /// regulation of transcription /// metal ion binding
7946089	1.79554	3.47144	9.83278	8.61069	4.50831e-08	9.87587e-06	8.81098	TRIM5	tripartite motif-containing 5	cytoplasmic mRNA processing body /// protein binding /// intracellular /// cytoplasm /// zinc ion binding /// response to virus /// ligase activity /// protein homodimerization activity /// interspecies interaction between organisms /// metal ion binding /// modification-dependent protein catabolic process
8087485	1.78281	3.44095	9.08709	8.69431	3.87554e-08	8.8771e-06	8.96004	UBA7	ubiquitin-like modifier activating enzyme 7	nucleotide binding /// ATP binding /// protein modification process /// metabolic process /// ligase activity /// ISG15 activating enzyme activity /// modification-dependent protein catabolic process /// ISG15-protein conjugation
8173848	1.77288	3.41734	6.90768	9.58839	8.12198e-09	2.37226e-06	10.4949	HDX	highly divergent homeobox	transcription factor activity /// nucleus /// regulation of transcription, DNA-dependent /// sequence-specific DNA binding
8051501	1.77048	3.41168	11.1401	12.8282	5.88599e-11	3.62937e-08	15.2436	EIF2AK2	eukaryotic translation initiation factor 2-alpha kinase 2	nucleotide binding /// double-stranded RNA binding /// protein serine/threonine kinase activity /// eukaryotic translation initiation factor 2alpha kinase activity /// protein binding /// ATP binding /// intracellular /// translation /// protein amino acid phosphorylation /// virus-infected cell apoptosis /// negative regulation of cell proliferation /// protein phosphatase type 2A regulator acti…
7896817	1.76318	3.39446	8.63041	10.1368	3.26498e-09	1.05548e-06	11.3847	ISG15	ISG15 ubiquitin-like modifier	protein binding /// extracellular region /// extracellular space /// cytoplasm /// cell-cell signaling /// response to virus /// modification-dependent protein catabolic process /// protein tag /// ISG15-protein conjugation /// interspecies interaction between organisms /// protein binding
7915787	1.72683	3.30999	8.97482	4.98215	7.69601e-05	0.00520841	1.42421	PIK3R3	phosphoinositide-3-kinase, regulatory subunit 3 (gamma)	protein binding /// phosphoinositide 3-kinase complex /// insulin receptor signaling pathway /// 1-phosphatidylinositol-3-kinase activity /// phosphoinositide 3-kinase regulator activity /// 1-phosphatidylinositol-3-kinase regulator activity
7969986	1.70603	3.26262	6.47421	7.60726	2.97213e-07	5.01869e-05	6.94592	TNFSF13B	tumor necrosis factor (ligand) superfamily, member 13b	B cell homeostasis /// positive regulation of germinal center formation /// receptor binding /// cytokine activity /// tumor necrosis factor receptor binding /// protein binding /// extracellular region /// extracellular space /// soluble fraction /// plasma membrane /// signal transduction /// cell proliferation /// positive regulation of cell proliferation /// integral to membrane /// positive …
8117458	1.70426	3.25861	8.11441	7.75011	2.25389e-07	3.90874e-05	7.2201	BTN3A1	butyrophilin, subfamily 3, member A1	lipid metabolic process /// membrane /// integral to membrane
8091327	1.69887	3.24647	10.9819	16.0333	1.09305e-12	1.47297e-09	18.9358	PLSCR1	phospholipid scramblase 1	calcium ion binding /// protein binding /// plasma membrane /// response to virus /// integral to membrane /// phospholipid scrambling /// SH3 domain binding /// phospholipid scramblase activity /// platelet activation
7948274	1.68093	3.20636	10.143	11.7221	2.81555e-10	1.35967e-07	13.7533	UBE2L6	ubiquitin-conjugating enzyme E2L 6	ubiquitin-protein ligase activity /// protein binding /// protein modification process /// ligase activity /// modification-dependent protein catabolic process /// ISG15-protein conjugation /// ISG15 ligase activity /// regulation of protein metabolic process /// ubiquitin-protein ligase activity /// post-translational protein modification
7995926	1.67913	3.20234	8.07564	13.9678	1.30856e-11	1.01328e-08	16.6555	NLRC5	NLR family, CARD domain containing 5	nucleotide binding /// protein binding /// ATP binding /// cytoplasm
7938012	1.64235	3.12174	7.26429	10.8653	1.02492e-09	4.13017e-07	12.5093	TRIM6 /// TRIM6-TRIM34 /// TRIM34 /// TRIM78P	tripartite motif-containing 6 /// TRIM6-TRIM34 readthrough /// tripartite motif-containing 34 /// tripartite motif-containing 78, pseudogene	molecular_function /// protein binding /// intracellular /// cytoplasm /// zinc ion binding /// metal ion binding /// protein trimerization
8083743	1.64089	3.11858	6.68093	5.87267	1.06266e-05	0.00099953	3.39081	ARL14	ADP-ribosylation factor-like 14	nucleotide binding /// GTP binding /// intracellular /// small GTPase mediated signal transduction
8137250	1.63922	3.11498	8.34187	8.03344	1.31267e-07	2.4148e-05	7.75537	GIMAP2	GTPase, IMAP family member 2	nucleotide binding /// GTP binding /// membrane /// integral to membrane
8101699	1.63829	3.11296	6.36091	6.62882	2.12826e-06	0.000250405	4.99052	---	---	---
7917503	1.63083	3.09692	9.0731	12.918	5.20807e-11	3.33487e-08	15.3593	GBP3	guanylate binding protein 3	nucleotide binding /// GTPase activity /// GTP binding /// membrane /// integral to membrane /// immune response
8099912	1.62779	3.0904	8.74612	8.52355	5.28303e-08	1.12044e-05	8.65459	C4orf34	chromosome 4 open reading frame 34	protein binding /// membrane /// integral to membrane
7960744	1.60888	3.05015	8.2493	9.46254	1.00609e-08	2.81512e-06	10.2852	C1R	complement component 1, r subcomponent	serine-type endopeptidase activity /// calcium ion binding /// extracellular region /// extracellular region /// proteolysis /// immune response /// complement activation, classical pathway /// peptidase activity /// serine-type peptidase activity /// innate immune response /// serine-type endopeptidase activity
8010454	1.60833	3.04898	10.1401	14.7582	4.88899e-12	4.28391e-09	17.568	RNF213 /// LOC100294362	ring finger protein 213 /// hypothetical LOC100294362	nucleotide binding /// protein binding /// zinc ion binding /// nucleoside-triphosphatase activity /// metal ion binding
7984779	1.59505	3.02104	9.47543	7.38884	4.56103e-07	7.23184e-05	6.52108	PML	promyelocytic leukemia	response to hypoxia /// DNA binding /// protein binding /// intracellular /// insoluble fraction /// nucleus /// nucleoplasm /// nucleolus /// cytoplasm /// protein complex assembly /// induction of apoptosis /// activation of caspase activity /// DNA damage response, signal transduction by p53 class mediator resulting in cell cycle arrest /// cell cycle arrest /// transforming growth factor beta…
8113073	1.59099	3.01255	9.94011	4.64269	0.000166882	0.00960255	0.658186	ARRDC3	arrestin domain containing 3	cytoplasm
8075720	1.58287	2.99566	8.17198	9.77835	5.9001e-09	1.81903e-06	10.8074	APOL2	apolipoprotein L, 2	receptor binding /// extracellular region /// cytoplasm /// endoplasmic reticulum membrane /// lipid metabolic process /// lipid transport /// acute-phase response /// multicellular organismal development /// high-density lipoprotein binding /// cholesterol metabolic process /// lipid binding /// lipoprotein metabolic process /// maternal process involved in female pregnancy
8010426	1.57294	2.9751	9.7426	15.0166	3.57787e-12	3.21979e-09	17.8552	KIAA1618 /// RNF213	KIAA1618 /// ring finger protein 213	nucleotide binding /// protein binding /// zinc ion binding /// nucleoside-triphosphatase activity /// metal ion binding
7967117	1.56838	2.96572	7.63525	6.22814	4.94465e-06	0.000517742	4.15191	OASL	2'-5'-oligoadenylate synthetase-like	DNA binding /// double-stranded RNA binding /// ATP binding /// nucleolus /// cytoplasm /// immune response /// biological_process /// transferase activity /// thyroid hormone receptor binding
8113504	1.56524	2.95926	10.1519	8.52489	5.27009e-08	1.12044e-05	8.657	C5orf13	chromosome 5 open reading frame 13	cytoplasm /// protein binding /// regulation of transforming growth factor beta receptor signaling pathway
8124562	1.54136	2.91069	7.50292	8.28901	8.13461e-08	1.61225e-05	8.22847	ZNF323	zinc finger protein 323	transcription factor activity /// intracellular /// nucleus /// cytoplasm /// regulation of transcription, DNA-dependent /// zinc ion binding /// metal ion binding /// nucleus
8144802	1.52792	2.8837	8.30814	10.6562	1.421e-09	5.4946e-07	12.1929	PDGFRL	platelet-derived growth factor receptor-like	platelet activating factor receptor activity /// platelet-derived growth factor beta-receptor activity /// cellular_component /// extracellular region /// biological_process
8006531	1.52498	2.87782	10.5748	9.61871	7.71587e-09	2.27359e-06	10.5451	SLFN5	schlafen family member 5	nucleotide binding /// ATP binding /// nucleus /// cell differentiation
8127778	1.5066	2.84139	9.1378	8.98732	2.2972e-08	5.75113e-06	9.47485	FAM46A	family with sequence similarity 46, member A	---
8178498	1.49886	2.8262	11.4535	10.3777	2.21144e-09	7.67024e-07	11.7637	HLA-C /// HLA-B	major histocompatibility complex, class I, C /// major histocompatibility complex, class I, B	antigen processing and presentation of peptide antigen via MHC class I /// protein binding /// membrane fraction /// plasma membrane /// integral to plasma membrane /// defense response /// immune response /// immune response /// membrane /// integral to membrane /// antigen processing and presentation /// MHC class I receptor activity /// MHC class I protein complex /// interspecies interaction …
8124911	1.49698	2.82251	11.3341	9.44866	1.03025e-08	2.85869e-06	10.262	HLA-C /// HLA-B	major histocompatibility complex, class I, C /// major histocompatibility complex, class I, B	antigen processing and presentation of peptide antigen via MHC class I /// protein binding /// membrane fraction /// plasma membrane /// integral to plasma membrane /// defense response /// immune response /// immune response /// membrane /// integral to membrane /// antigen processing and presentation /// MHC class I receptor activity /// MHC class I protein complex /// interspecies interaction …
8117760	1.48647	2.80203	7.71512	15.8533	1.34193e-12	1.67923e-09	18.75	HLA-F	major histocompatibility complex, class I, F	antigen processing and presentation of peptide antigen via MHC class I /// immune response /// membrane /// integral to membrane /// antigen processing and presentation /// MHC class I receptor activity /// MHC class I protein complex
8179731	1.48574	2.80061	11.5345	10.6494	1.43627e-09	5.4946e-07	12.1826	---	---	---
7949340	1.48559	2.80031	8.34028	10.3478	2.32034e-09	7.96497e-07	11.717	BATF2	basic leucine zipper transcription factor, ATF-like 2	transcription factor activity /// protein binding /// nucleus /// regulation of transcription, DNA-dependent /// sequence-specific DNA binding /// protein dimerization activity
8177717	1.47335	2.77667	8.50101	15.2549	2.69342e-12	2.71766e-09	18.1154	HLA-F	major histocompatibility complex, class I, F	antigen processing and presentation of peptide antigen via MHC class I /// immune response /// membrane /// integral to membrane /// antigen processing and presentation /// MHC class I receptor activity /// MHC class I protein complex
8152703	1.47176	2.7736	9.62544	5.24056	4.29651e-05	0.00318621	2.00238	FBXO32	F-box protein 32	protein binding /// modification-dependent protein catabolic process
7937940	1.45593	2.74334	6.40931	5.03589	6.81408e-05	0.00474662	1.54486	OR52K3P	olfactory receptor, family 52, subfamily K, member 3 pseudogene	---
8179019	1.43952	2.71231	8.08772	16.023	1.10593e-12	1.47297e-09	18.9252	HLA-F	major histocompatibility complex, class I, F	antigen processing and presentation of peptide antigen via MHC class I /// immune response /// membrane /// integral to membrane /// antigen processing and presentation /// MHC class I receptor activity /// MHC class I protein complex
8055697	1.43708	2.70773	7.81535	8.5246	5.27285e-08	1.12044e-05	8.65649	RBM43	RNA binding motif protein 43	RNA binding
8169995	1.43689	2.70737	8.06432	7.99466	1.4126e-07	2.57023e-05	7.68277	FAM122C	family with sequence similarity 122C	---
8037794	1.43245	2.69904	9.32589	4.70279	0.000145426	0.00872477	0.794218	PRKD2	protein kinase D2	nucleotide binding /// protein serine/threonine kinase activity /// protein kinase C activity /// ATP binding /// intracellular /// cytoplasm /// protein amino acid phosphorylation /// membrane /// transferase activity /// metal ion binding /// intracellular signaling cascade /// zinc ion binding /// diacylglycerol binding
8162729	1.42631	2.68758	10.2007	7.15791	7.22347e-07	0.000106425	6.06458	TRIM14	tripartite motif-containing 14	molecular_function /// intracellular /// biological_process /// zinc ion binding /// metal ion binding
7951217	1.42465	2.6845	6.43402	6.69859	1.84164e-06	0.000224049	5.13437	MMP7	matrix metallopeptidase 7 (matrilysin, uterine)	metalloendopeptidase activity /// extracellular region /// proteinaceous extracellular matrix /// extracellular space /// proteolysis /// metabolic process /// peptidase activity /// zinc ion binding /// collagen catabolic process /// regulation of cell proliferation /// metal ion binding /// metalloendopeptidase activity /// calcium ion binding /// proteolysis
8146092	1.39813	2.63559	5.10191	6.2107	5.1319e-06	0.000532683	4.11493	IDO1	indoleamine 2,3-dioxygenase 1	cytokine production involved in inflammatory response /// positive regulation of T cell tolerance induction /// positive regulation of chronic inflammatory response /// positive regulation of T-helper 2 type immune response /// tryptophan 2,3-dioxygenase activity /// soluble fraction /// cytoplasm /// cytosol /// tryptophan catabolic process /// female pregnancy /// behavior /// electron carrier …
8117321	1.39544	2.63068	9.57905	7.46868	3.89719e-07	6.32998e-05	6.67716	TRIM38	tripartite motif-containing 38	signal transducer activity /// protein binding /// cellular_component /// intracellular /// zinc ion binding /// positive regulation of I-kappaB kinase/NF-kappaB cascade /// metal ion binding
8119198	1.39442	2.62882	9.58901	12.9255	5.15573e-11	3.33487e-08	15.3688	FTSJD2	FtsJ methyltransferase domain containing 2	nucleic acid binding /// protein binding /// intracellular /// nucleus /// methyltransferase activity /// transferase activity /// methylation
8160213	1.38981	2.62045	6.69177	8.10052	1.15678e-07	2.16982e-05	7.88043	TTC39B	tetratricopeptide repeat domain 39B	binding
8048976	1.3608	2.56828	8.07552	7.21459	6.44827e-07	9.58519e-05	6.17733	---	---	---
8177788	1.35463	2.55732	10.3724	10.3178	2.43491e-09	8.18942e-07	11.6701	HLA-E /// HLA-C /// HLA-B	major histocompatibility complex, class I, E /// major histocompatibility complex, class I, C /// major histocompatibility complex, class I, B	antigen processing and presentation of peptide antigen via MHC class I /// protein binding /// membrane fraction /// plasma membrane /// integral to plasma membrane /// defense response /// immune response /// immune response /// membrane /// integral to membrane /// antigen processing and presentation /// MHC class I receptor activity /// MHC class I protein complex /// interspecies interaction …
8179103	1.35463	2.55732	10.3724	10.3178	2.43491e-09	8.18942e-07	11.6701	HLA-E /// HLA-C /// HLA-B	major histocompatibility complex, class I, E /// major histocompatibility complex, class I, C /// major histocompatibility complex, class I, B	antigen processing and presentation of peptide antigen via MHC class I /// protein binding /// membrane fraction /// plasma membrane /// integral to plasma membrane /// defense response /// immune response /// immune response /// membrane /// integral to membrane /// antigen processing and presentation /// MHC class I receptor activity /// MHC class I protein complex /// interspecies interaction …
8117890	1.33637	2.52515	10.3126	9.66671	7.11557e-09	2.15388e-06	10.6243	HLA-E /// HLA-C /// HLA-B	major histocompatibility complex, class I, E /// major histocompatibility complex, class I, C /// major histocompatibility complex, class I, B	antigen processing and presentation of peptide antigen via MHC class I /// protein binding /// membrane fraction /// plasma membrane /// integral to plasma membrane /// defense response /// immune response /// immune response /// membrane /// integral to membrane /// antigen processing and presentation /// MHC class I receptor activity /// MHC class I protein complex /// interspecies interaction …
7951397	1.33331	2.51981	6.6079	7.021	9.51946e-07	0.000135457	5.79038	CASP1	caspase 1, apoptosis-related cysteine peptidase (interleukin 1, beta, convertase)	response to hypoxia /// cysteine-type endopeptidase activity /// protein binding /// extracellular region /// intracellular /// cytoplasm /// proteolysis /// apoptosis /// induction of apoptosis /// signal transduction /// cell death /// peptidase activity /// caspase activator activity /// protein processing /// response to ATP /// response to chemical stimulus /// regulation of apoptosis /// po…
7987454	1.32725	2.50925	8.05915	7.55551	3.28761e-07	5.41919e-05	6.84588	BMF	Bcl2 modifying factor	protein binding /// protein binding /// cytoplasm /// cytosol /// plasma membrane /// apoptosis /// myosin complex /// regulation of apoptosis
8178489	1.32419	2.50392	11.0139	11.1847	6.27713e-10	2.75012e-07	12.9827	---	---	---
7906400	1.31685	2.49122	11.7322	7.10009	8.11399e-07	0.000117979	5.9491	IFI16	interferon, gamma-inducible protein 16	DNA binding /// double-stranded DNA binding /// protein binding /// nucleus /// nucleoplasm /// nucleolus /// cytoplasm /// regulation of transcription, DNA-dependent /// cell proliferation /// response to virus /// transcription repressor activity /// hemopoiesis /// myeloid cell differentiation /// monocyte differentiation /// DNA damage response, signal transduction by p53 class mediator resul…
7925257	1.3138	2.48596	8.78519	7.94416	1.55465e-07	2.78308e-05	7.58793	LYST	lysosomal trafficking regulator	protein binding /// cytoplasm /// protein transport /// microtubule cytoskeleton /// leukocyte chemotaxis /// melanosome organization /// endosome to lysosome transport via multivesicular body sorting pathway /// mast cell secretory granule organization /// natural killer cell mediated cytotoxicity /// defense response to bacterium /// defense response to protozoan /// pigmentation /// defense re…
8124901	1.31023	2.47982	11.0075	10.863	1.02851e-09	4.13017e-07	12.5059	HLA-C /// HLA-B	major histocompatibility complex, class I, C /// major histocompatibility complex, class I, B	antigen processing and presentation of peptide antigen via MHC class I /// protein binding /// membrane fraction /// plasma membrane /// integral to plasma membrane /// defense response /// immune response /// immune response /// membrane /// integral to membrane /// antigen processing and presentation /// MHC class I receptor activity /// MHC class I protein complex /// interspecies interaction …
7918426	1.31006	2.47952	8.59434	5.11728	5.6697e-05	0.00405987	1.72719	SLC16A4	solute carrier family 16, member 4 (monocarboxylic acid transporter 5)	membrane fraction /// plasma membrane /// integral to plasma membrane /// monocarboxylic acid transmembrane transporter activity /// symporter activity /// monocarboxylic acid transport /// transmembrane transport /// transport
8168733	1.30784	2.47571	6.69084	6.75323	1.64517e-06	0.0002044	5.24655	---	---	---
7948493	1.30486	2.4706	7.11474	8.58231	4.74678e-08	1.03303e-05	8.76015	SLC15A3 /// TMEM132A	solute carrier family 15, member 3 /// transmembrane protein 132A	transporter activity /// lysosomal membrane /// oligopeptide transport /// protein transport /// symporter activity /// peptide:hydrogen symporter activity /// membrane /// integral to membrane /// Golgi membrane /// molecular_function /// cellular_component /// endoplasmic reticulum /// endoplasmic reticulum membrane /// Golgi apparatus /// biological_process /// lysosome
8052331	1.28769	2.44136	10.9186	6.11901	6.2433e-06	0.000629949	3.9199	PNPT1	polyribonucleotide nucleotidyltransferase 1	3'-5'-exoribonuclease activity /// RNA binding /// polyribonucleotide nucleotidyltransferase activity /// mitochondrion /// mitochondrial intermembrane space /// RNA processing /// mRNA catabolic process /// transferase activity
7902512	1.26924	2.41035	9.45738	4.84627	0.000104804	0.00672384	1.11832	DNAJB4	DnaJ (Hsp40) homolog, subfamily B, member 4	cytoplasm /// plasma membrane /// protein folding /// response to unfolded protein /// response to heat /// heat shock protein binding /// unfolded protein binding /// unfolded protein binding
8177725	1.25397	2.38498	11.3835	8.92056	2.58549e-08	6.37696e-06	9.35858	HLA-G /// HLA-A	major histocompatibility complex, class I, G /// major histocompatibility complex, class I, A	antigen processing and presentation of peptide antigen via MHC class I /// immune response /// cellular defense response /// membrane /// integral to membrane /// antigen processing and presentation /// MHC class I receptor activity /// MHC class I protein complex /// Golgi membrane /// protein binding /// integral to plasma membrane /// immune response /// early endosome membrane /// MHC class I…
8179034	1.25397	2.38498	11.3835	8.92056	2.58549e-08	6.37696e-06	9.35858	HLA-G /// HLA-A	major histocompatibility complex, class I, G /// major histocompatibility complex, class I, A	antigen processing and presentation of peptide antigen via MHC class I /// immune response /// cellular defense response /// membrane /// integral to membrane /// antigen processing and presentation /// MHC class I receptor activity /// MHC class I protein complex /// Golgi membrane /// protein binding /// integral to plasma membrane /// immune response /// early endosome membrane /// MHC class I…
8098261	1.22484	2.33729	5.92488	6.6998	1.83706e-06	0.000224049	5.13685	---	---	---
7958200	1.22223	2.33307	9.99187	6.80269	1.48597e-06	0.000190301	5.34775	EID3	EP300 interacting inhibitor of differentiation 3	nucleus /// cytoplasm /// regulation of transcription
8013450	1.21549	2.3222	7.95345	7.42624	4.23659e-07	6.78201e-05	6.59431	LGALS9C /// LGALS9B /// LGALS9	lectin, galactoside-binding, soluble, 9C /// lectin, galactoside-binding, soluble, 9B /// lectin, galactoside-binding, soluble, 9	signal transducer activity /// sugar binding /// galactose binding /// extracellular region /// cytoplasm /// positive regulation of I-kappaB kinase/NF-kappaB cascade
8091141	1.18562	2.27462	10.777	9.15159	1.72149e-08	4.54924e-06	9.75837	XRN1	5'-3' exoribonuclease 1	DNA binding /// RNA binding /// protein binding /// intracellular /// cytoplasm /// nucleobase, nucleoside, nucleotide and nucleic acid metabolic process /// 5'-3' exonuclease activity /// hydrolase activity /// histone mRNA catabolic process
8177732	1.17993	2.26566	11.4917	10.4964	1.82978e-09	6.6952e-07	11.9477	HLA-A /// HLA-C /// HLA-K /// LOC441528 /// HLA-B	major histocompatibility complex, class I, A /// major histocompatibility complex, class I, C /// major histocompatibility complex, class I, K (pseudogene) /// hypothetical protein LOC441528 /// major histocompatibility complex, class I, B	Golgi membrane /// antigen processing and presentation of peptide antigen via MHC class I /// protein binding /// integral to plasma membrane /// immune response /// immune response /// membrane /// integral to membrane /// antigen processing and presentation /// early endosome membrane /// MHC class I receptor activity /// MHC class I protein complex /// interspecies interaction between organism…
7910950	1.17748	2.26182	5.48997	7.09548	8.18981e-07	0.000118564	5.93986	KMO /// OPN3	kynurenine 3-monooxygenase (kynurenine 3-hydroxylase) /// opsin 3	monooxygenase activity /// kynurenine 3-monooxygenase activity /// kynurenine 3-monooxygenase activity /// mitochondrion /// mitochondrial outer membrane /// mitochondrial inner membrane /// cytosol /// electron carrier activity /// response to salt stress /// membrane /// integral to membrane /// NAD(P)H oxidase activity /// pyridine nucleotide biosynthetic process /// tryptophan catabolic proce…
8021546	1.17635	2.26004	8.32463	4.84871	0.000104224	0.0067125	1.12381	ZCCHC2 /// C18orf49	zinc finger, CCHC domain containing 2 /// chromosome 18 open reading frame 49	nucleic acid binding /// protein binding /// cytoplasm /// cell communication /// zinc ion binding /// phosphoinositide binding /// metal ion binding
7935639	1.17457	2.25725	8.87003	8.3058	7.88527e-08	1.58166e-05	8.25922	SLC25A28	solute carrier family 25, member 28	binding /// mitochondrion /// mitochondrial inner membrane /// ion transport /// iron ion transport /// membrane /// integral to membrane /// transmembrane transport /// iron ion binding
8094259	1.17319	2.2551	10.3032	8.12532	1.10411e-07	2.11068e-05	7.92651	LAP3	leucine aminopeptidase 3	magnesium ion binding /// aminopeptidase activity /// intracellular /// cytoplasm /// mitochondrion /// proteolysis /// peptidase activity /// metalloexopeptidase activity /// zinc ion binding /// manganese ion binding /// protein metabolic process
8005458	1.17283	2.25453	7.82693	7.3718	4.71726e-07	7.3742e-05	6.48766	LGALS9C /// LGALS9B /// LGALS9	lectin, galactoside-binding, soluble, 9C /// lectin, galactoside-binding, soluble, 9B /// lectin, galactoside-binding, soluble, 9	signal transducer activity /// sugar binding /// galactose binding /// extracellular region /// cytoplasm /// positive regulation of I-kappaB kinase/NF-kappaB cascade
8107934	1.1679	2.24684	8.28884	8.4726	5.79883e-08	1.20677e-05	8.56267	C5orf56	chromosome 5 open reading frame 56	---
8048940	1.14705	2.21461	10.2778	10.9088	9.58055e-10	4.08979e-07	12.5745	SP100	SP100 nuclear antigen	negative regulation of transcription from RNA polymerase II promoter /// DNA binding /// transcription coactivator activity /// transcription corepressor activity /// protein binding /// nucleus /// chromosome /// DNA damage response, signal transduction by p53 class mediator resulting in transcription of p21 class mediator /// PML body /// kinase binding /// protein domain specific binding /// r…
7951309	1.14467	2.21095	6.95695	4.6841	0.000151783	0.00900874	0.75192	MMP13	matrix metallopeptidase 13 (collagenase 3)	metalloendopeptidase activity /// calcium ion binding /// extracellular region /// proteinaceous extracellular matrix /// extracellular space /// proteolysis /// metabolic process /// peptidase activity /// zinc ion binding /// collagen catabolic process /// metalloendopeptidase activity /// proteolysis /// zinc ion binding
8021563	1.13801	2.20077	7.34994	10.8886	9.88476e-10	4.11416e-07	12.5443	---	---	---
8016847	1.12809	2.18569	11.485	11.2293	5.86688e-10	2.60466e-07	13.0478	TRIM25	tripartite motif-containing 25	transcription factor activity /// ubiquitin-protein ligase activity /// protein binding /// nucleus /// nucleolus /// cytoplasm /// focal adhesion /// zinc ion binding /// response to virus /// ligase activity /// acid-amino acid ligase activity /// cell junction /// interspecies interaction between organisms /// innate immune response /// metal ion binding /// cytoplasm
7916616	1.12525	2.18139	7.22554	12.4831	9.47952e-11	5.26066e-08	14.7919	CYP2J2	cytochrome P450, family 2, subfamily J, polypeptide 2	endoplasmic reticulum /// endoplasmic reticulum membrane /// microsome /// icosanoid metabolic process /// xenobiotic metabolic process /// regulation of heart contraction /// arachidonic acid epoxygenase activity /// arachidonic acid 14,15-epoxygenase activity /// arachidonic acid 11,12-epoxygenase activity /// electron carrier activity /// membrane /// epoxygenase P450 pathway /// heme binding …
8179041	1.12333	2.17849	11.7162	7.08164	8.42151e-07	0.00012139	5.91214	---	---	---
8117435	1.12046	2.17416	8.37165	8.38882	6.76368e-08	1.37323e-05	8.41075	BTN3A2	butyrophilin, subfamily 3, member A2	biological_process /// membrane /// integral to membrane
8125500	1.12033	2.17396	8.39974	8.6871	3.9263e-08	8.8771e-06	8.94722	PSMB8	proteasome (prosome, macropain) subunit, beta type, 8 (large multifunctional peptidase 7)	proteasome complex /// threonine-type endopeptidase activity /// protein binding /// nucleus /// cytoplasm /// proteasome core complex /// immune response /// peptidase activity /// anaphase-promoting complex-dependent proteasomal ubiquitin-dependent protein catabolic process /// interspecies interaction between organisms /// negative regulation of ubiquitin-protein ligase activity involved in mi…
8178855	1.12033	2.17396	8.39974	8.6871	3.9263e-08	8.8771e-06	8.94722	PSMB8	proteasome (prosome, macropain) subunit, beta type, 8 (large multifunctional peptidase 7)	proteasome complex /// threonine-type endopeptidase activity /// protein binding /// nucleus /// cytoplasm /// proteasome core complex /// immune response /// peptidase activity /// anaphase-promoting complex-dependent proteasomal ubiquitin-dependent protein catabolic process /// interspecies interaction between organisms /// negative regulation of ubiquitin-protein ligase activity involved in mi…
8180049	1.12033	2.17396	8.39974	8.6871	3.9263e-08	8.8771e-06	8.94722	PSMB8	proteasome (prosome, macropain) subunit, beta type, 8 (large multifunctional peptidase 7)	proteasome complex /// threonine-type endopeptidase activity /// protein binding /// nucleus /// cytoplasm /// proteasome core complex /// immune response /// peptidase activity /// anaphase-promoting complex-dependent proteasomal ubiquitin-dependent protein catabolic process /// interspecies interaction between organisms /// negative regulation of ubiquitin-protein ligase activity involved in mi…
7917561	1.11521	2.16627	5.46608	7.485	3.77428e-07	6.16041e-05	6.70895	GBP4	guanylate binding protein 4	nucleotide binding /// GTPase activity /// GTP binding /// cytoplasm /// immune response
8117800	1.113	2.16295	11.4988	11.1707	6.41215e-10	2.7728e-07	12.9621	HLA-A /// HLA-C /// HLA-K /// LOC441528 /// HLA-B	major histocompatibility complex, class I, A /// major histocompatibility complex, class I, C /// major histocompatibility complex, class I, K (pseudogene) /// hypothetical protein LOC441528 /// major histocompatibility complex, class I, B	Golgi membrane /// antigen processing and presentation of peptide antigen via MHC class I /// protein binding /// integral to plasma membrane /// immune response /// immune response /// membrane /// integral to membrane /// antigen processing and presentation /// early endosome membrane /// MHC class I receptor activity /// MHC class I protein complex /// interspecies interaction between organism…
8066905	1.11021	2.15876	10.8965	8.61453	4.47704e-08	9.87232e-06	8.81784	ZNFX1	zinc finger, NFX1-type containing 1	nucleotide binding /// serine-tRNA ligase activity /// ATP binding /// cytoplasm /// translation /// seryl-tRNA aminoacylation /// metal ion binding /// transcription factor activity /// nucleus /// regulation of transcription, DNA-dependent /// zinc ion binding
8060997	1.11018	2.15872	8.71967	4.86933	9.94436e-05	0.00647979	1.17031	SPTLC3	serine palmitoyltransferase, long chain base subunit 3	serine C-palmitoyltransferase activity /// endoplasmic reticulum /// endoplasmic reticulum membrane /// acyltransferase activity /// biosynthetic process /// membrane /// integral to membrane /// transferase activity, transferring nitrogenous groups /// serine C-palmitoyltransferase complex /// sphingolipid biosynthetic process /// pyridoxal phosphate binding /// sphingoid biosynthetic process
8179049	1.10942	2.15758	11.6062	6.65411	2.01941e-06	0.000241819	5.04274	HLA-G /// HLA-J /// HLA-A	major histocompatibility complex, class I, G /// major histocompatibility complex, class I, J (pseudogene) /// major histocompatibility complex, class I, A	Golgi membrane /// antigen processing and presentation of peptide antigen via MHC class I /// protein binding /// integral to plasma membrane /// immune response /// immune response /// membrane /// integral to membrane /// antigen processing and presentation /// early endosome membrane /// MHC class I receptor activity /// MHC class I protein complex /// interspecies interaction between organism…
8111220	1.10838	2.15604	6.42774	6.60786	2.22302e-06	0.000257909	4.9472	CDH18	cadherin 18, type 2	calcium ion binding /// protein binding /// plasma membrane /// cell adhesion /// homophilic cell adhesion /// integral to membrane /// plasma membrane
8117813	1.10356	2.14885	11.4398	7.3826	4.61761e-07	7.28686e-05	6.50884	HLA-G /// HLA-J /// HLA-A	major histocompatibility complex, class I, G /// major histocompatibility complex, class I, J (pseudogene) /// major histocompatibility complex, class I, A	Golgi membrane /// antigen processing and presentation of peptide antigen via MHC class I /// protein binding /// integral to plasma membrane /// immune response /// immune response /// membrane /// integral to membrane /// antigen processing and presentation /// early endosome membrane /// MHC class I receptor activity /// MHC class I protein complex /// interspecies interaction between organism…
8179638	1.09966	2.14304	9.60112	8.85992	2.87994e-08	6.9488e-06	9.25244	TRIM26	tripartite motif-containing 26	DNA binding /// protein binding /// cellular_component /// intracellular /// cytoplasm /// biological_process /// zinc ion binding /// metal ion binding
8012949	1.09312	2.13334	7.72939	4.76728	0.000125493	0.0077668	0.940023	TRIM16 /// FBXW10 /// CDRT1	tripartite motif-containing 16 /// F-box and WD repeat domain containing 10 /// CMT1A duplicated region transcript 1	molecular_function /// cellular_component /// biological_process /// DNA binding /// protein binding /// intracellular /// cytoplasm /// zinc ion binding /// transcription activator activity /// PML body /// interleukin-1 binding /// NACHT domain binding /// response to retinoic acid /// positive regulation of gene-specific transcription /// histone H3 acetylation /// histone H4 acetylation /// p…
7972932	1.08484	2.12114	7.64855	4.62093	0.000175417	0.00995037	0.608899	FLJ41484	hypothetical LOC650669	---
8075695	1.06613	2.09381	6.89919	8.12467	1.10547e-07	2.11068e-05	7.9253	APOL3	apolipoprotein L, 3	signal transducer activity /// lipid transporter activity /// cellular_component /// extracellular region /// cytoplasm /// lipid transport /// inflammatory response /// lipid binding /// lipoprotein metabolic process /// positive regulation of I-kappaB kinase/NF-kappaB cascade
8117777	1.0561	2.0793	10.2002	9.49442	9.52808e-09	2.68861e-06	10.3385	HLA-G /// HLA-A /// HLA-K /// LOC441528 /// HLA-B /// HLA-H	major histocompatibility complex, class I, G /// major histocompatibility complex, class I, A /// major histocompatibility complex, class I, K (pseudogene) /// hypothetical protein LOC441528 /// major histocompatibility complex, class I, B /// major histocompatibility complex, class I, H (pseudogene)	Golgi membrane /// antigen processing and presentation of peptide antigen via MHC class I /// protein binding /// integral to plasma membrane /// immune response /// immune response /// membrane /// integral to membrane /// antigen processing and presentation /// early endosome membrane /// MHC class I receptor activity /// MHC class I protein complex /// interspecies interaction between organism…
8098263	1.05441	2.07687	7.30392	6.90764	1.19865e-06	0.000162904	5.56136	PALLD	palladin, cytoskeletal associated protein	actin binding /// protein binding /// nucleus /// cytoplasm /// cytoskeleton /// actin filament /// cytoskeleton organization /// muscle alpha-actinin binding
8114470	1.04604	2.06486	7.56297	6.15716	5.75353e-06	0.000585857	4.00117	LRRTM2 /// CTNNA1	leucine rich repeat transmembrane neuronal 2 /// catenin (cadherin-associated protein), alpha 1, 102kDa	structural molecule activity /// protein binding /// cytoplasm /// plasma membrane /// cell-cell junction /// adherens junction /// cell adhesion /// beta-catenin binding /// actin cytoskeleton /// catenin complex /// vinculin binding /// apical junction assembly /// gamma-catenin binding /// cadherin binding /// protein binding /// membrane /// integral to membrane
8068494	1.04188	2.0589	7.85556	6.72927	1.72854e-06	0.00021396	5.1974	---	---	---
8019622	1.04082	2.05739	8.93954	6.90499	1.20513e-06	0.000163119	5.556	TMEM106A /// FLJ77644	transmembrane protein 106A /// hypothetical LOC728772	molecular_function /// cellular_component /// biological_process /// membrane /// integral to membrane
7924465	1.02448	2.03422	8.14607	6.98551	1.02297e-06	0.000142518	5.71887	HHIPL2	HHIP-like 2	catalytic activity /// extracellular region /// carbohydrate metabolic process /// oxidoreductase activity, acting on the CH-OH group of donors, quinone or similar compound as acceptor /// quinone binding
8124726	1.02144	2.02994	9.46611	8.47898	5.73143e-08	1.20025e-05	8.57421	TRIM26	tripartite motif-containing 26	DNA binding /// protein binding /// cellular_component /// intracellular /// cytoplasm /// biological_process /// zinc ion binding /// metal ion binding
7920531	1.01482	2.02066	11.1374	11.5645	3.55132e-10	1.61984e-07	13.5306	ADAR	adenosine deaminase, RNA-specific	DNA binding /// double-stranded RNA binding /// double-stranded RNA adenosine deaminase activity /// double-stranded RNA adenosine deaminase activity /// intracellular /// nucleus /// nucleus /// nucleolus /// cytoplasm /// mRNA processing /// base conversion or substitution editing /// hydrolase activity /// gene silencing by RNA /// metal ion binding /// nucleolus /// zinc ion binding
7921332	1.00652	2.00906	8.12407	4.93805	8.50607e-05	0.00569872	1.32505	CD5L	CD5 molecule-like	scavenger receptor activity /// extracellular region /// extracellular space /// apoptosis /// cellular defense response /// membrane
8171297	1.00304	2.00422	11.5164	5.26607	4.05769e-05	0.00303471	2.05916	MID1	midline 1 (Opitz/BBB syndrome)	microtubule cytoskeleton organization /// protein binding /// intracellular /// cytoplasm /// spindle /// microtubule /// microtubule associated complex /// negative regulation of microtubule depolymerization /// pattern specification process /// zinc ion binding /// ligase activity /// metal ion binding /// protein binding /// modification-dependent protein catabolic process
8156571	1.00122	2.00169	6.66369	6.55349	2.48973e-06	0.000281975	4.8345	C9orf3 /// MIR27B	chromosome 9 open reading frame 3 /// microRNA 27b	aminopeptidase activity /// binding /// cytoplasm /// proteolysis /// peptidase activity /// metallopeptidase activity /// zinc ion binding /// leukotriene biosynthetic process /// metal ion binding
8080781	1.00058	2.0008	11.2403	5.2754	3.97369e-05	0.00299348	2.07992	PXK	PX domain containing serine/threonine kinase	nucleotide binding /// actin binding /// protein kinase activity /// protein binding /// ATP binding /// cytoplasm /// plasma membrane /// protein amino acid phosphorylation /// inflammatory response /// cell communication /// phosphoinositide binding /// regulation of synaptic transmission
7974689	0.999104	1.99876	7.29286	4.78411	0.000120763	0.00751596	0.978038	DACT1	dapper, antagonist of beta-catenin, homolog 1 (Xenopus laevis)	protein binding /// nucleus /// cytoplasm /// multicellular organismal development /// Wnt receptor signaling pathway /// nucleus /// cytoplasm
8007483	0.991736	1.98858	8.90918	6.90286	1.21038e-06	0.000163167	5.55167	TMEM106A /// FLJ77644	transmembrane protein 106A /// hypothetical LOC728772	molecular_function /// cellular_component /// biological_process /// membrane /// integral to membrane
8058570	0.991601	1.98839	7.61793	7.37581	4.67998e-07	7.35043e-05	6.49553	C2orf67	chromosome 2 open reading frame 67	---
7904050	0.973338	1.96338	10.6935	5.4158	2.90421e-05	0.00231898	2.3913	MOV10	Mov10, Moloney leukemia virus 10, homolog (mouse)	nucleotide binding /// cytoplasmic mRNA processing body /// RNA binding /// helicase activity /// protein binding /// ATP binding /// cytoplasm /// hydrolase activity /// gene silencing by RNA /// mRNA cleavage involved in gene silencing by miRNA /// regulation of transcription /// gene silencing by miRNA, mRNA cleavage
8073081	0.968489	1.95679	8.86695	5.78274	1.29276e-05	0.00118909	3.19586	APOBEC3F	apolipoprotein B mRNA editing enzyme, catalytic polypeptide-like 3F	positive regulation of defense response to virus by host /// RNA binding /// cytidine deaminase activity /// transcription, RNA-dependent /// zinc ion binding /// base conversion or substitution editing /// hydrolase activity /// apolipoprotein B mRNA editing enzyme complex /// innate immune response /// negative regulation of retroviral genome replication /// metal ion binding /// negative regul…
8097553	0.958106	1.94276	6.80278	6.67494	1.93405e-06	0.000232484	5.08569	IL15	interleukin 15	NK T cell proliferation /// signal transducer activity /// cytokine activity /// protein binding /// extracellular region /// extracellular space /// membrane fraction /// nucleus /// cytoplasm /// endosome /// Golgi apparatus /// integral to plasma membrane /// inflammatory response /// immune response /// signal transduction /// cell-cell signaling /// aging /// positive regulation of cell prol…
7924450	0.948382	1.92971	10.2168	5.01651	7.11963e-05	0.00490812	1.50137	DUSP10	dual specificity phosphatase 10	phosphoprotein phosphatase activity /// protein tyrosine phosphatase activity /// nucleus /// cytoplasm /// protein amino acid dephosphorylation /// response to stress /// JNK cascade /// hydrolase activity /// MAP kinase tyrosine/serine/threonine phosphatase activity /// nucleus /// cytoplasm /// protein amino acid dephosphorylation
7931899	0.942127	1.92136	9.30171	9.07147	1.98077e-08	5.1127e-06	9.62054	IL15RA	interleukin 15 receptor, alpha	Golgi membrane /// signal transducer activity /// receptor activity /// cytokine receptor activity /// protein binding /// extracellular region /// extracellular space /// nucleus /// endoplasmic reticulum /// endoplasmic reticulum membrane /// Golgi apparatus /// signal transduction /// cell proliferation /// membrane /// integral to membrane /// cytoplasmic vesicle membrane /// cytoplasmic vesi…
8026971	0.939359	1.91768	9.33273	4.96321	8.03389e-05	0.00540413	1.38163	IFI30	interferon, gamma-inducible protein 30	extracellular region /// lysosome /// oxidoreductase activity /// antigen processing and presentation of exogenous peptide antigen via MHC class II /// negative regulation of fibroblast proliferation /// protein stabilization /// oxidation reduction /// lysosome
8139033	0.932598	1.90871	6.08462	6.35086	3.81103e-06	0.000410666	4.41099	AOAH	acyloxyacyl hydrolase (neutrophil)	catalytic activity /// lipoprotein lipase activity /// lipid metabolic process /// inflammatory response /// hydrolase activity, acting on ester bonds /// acyloxyacyl hydrolase activity /// lipid metabolic process /// lipopolysaccharide metabolic process /// negative regulation of inflammatory response
7980316	0.931247	1.90692	8.06217	8.11175	1.1326e-07	2.14275e-05	7.90131	TGFB3	transforming growth factor, beta 3	activation of MAPK activity /// response to hypoxia /// in utero embryonic development /// type II transforming growth factor beta receptor binding /// type II transforming growth factor beta receptor binding /// protein binding /// extracellular region /// extracellular space /// nucleus /// cytoplasm /// plasma membrane /// induction of apoptosis /// transforming growth factor beta receptor sig…
8178086	0.929285	1.90433	10.1665	5.86861	1.07208e-05	0.00100273	3.38202	HSPA1A /// HSPA1B	heat shock 70kDa protein 1A /// heat shock 70kDa protein 1B	nucleotide binding /// protein binding /// protein binding /// ATP binding /// nucleus /// cytoplasm /// cytoplasm /// mitochondrion /// endoplasmic reticulum /// mRNA catabolic process /// anti-apoptosis /// response to unfolded protein /// negative regulation of cell proliferation /// inclusion body /// nuclear speck /// negative regulation of cell growth /// ribonucleoprotein complex /// ubiqu…
8179324	0.929285	1.90433	10.1665	5.86861	1.07208e-05	0.00100273	3.38202	HSPA1A /// HSPA1B	heat shock 70kDa protein 1A /// heat shock 70kDa protein 1B	nucleotide binding /// protein binding /// protein binding /// ATP binding /// nucleus /// cytoplasm /// cytoplasm /// mitochondrion /// endoplasmic reticulum /// mRNA catabolic process /// anti-apoptosis /// response to unfolded protein /// negative regulation of cell proliferation /// inclusion body /// nuclear speck /// negative regulation of cell growth /// ribonucleoprotein complex /// ubiqu…
8096919	0.928596	1.90342	7.15753	5.78326	1.29131e-05	0.00118909	3.19698	ALPK1	alpha-kinase 1	protein serine/threonine kinase activity /// ATP binding /// protein amino acid phosphorylation /// kinase activity /// transferase activity
8180374	0.92817	1.90286	8.19521	5.41899	2.88367e-05	0.00230811	2.39836	---	---	---
8118314	0.927213	1.9016	10.3653	5.97297	8.54975e-06	0.000832401	3.60712	HSPA1A /// HSPA1B	heat shock 70kDa protein 1A /// heat shock 70kDa protein 1B	nucleotide binding /// protein binding /// protein binding /// ATP binding /// nucleus /// cytoplasm /// cytoplasm /// mitochondrion /// endoplasmic reticulum /// mRNA catabolic process /// anti-apoptosis /// response to unfolded protein /// negative regulation of cell proliferation /// inclusion body /// nuclear speck /// negative regulation of cell growth /// ribonucleoprotein complex /// ubiqu…
8048926	0.926935	1.90123	9.54775	7.3149	5.28025e-07	8.06498e-05	6.37574	SP140L	SP140 nuclear body protein-like	DNA binding /// binding /// nucleus /// zinc ion binding /// metal ion binding
8156060	0.917227	1.88848	10.2203	7.296	5.48236e-07	8.33543e-05	6.33845	TLE4	transducin-like enhancer of split 4 (E(sp1) homolog, Drosophila)	molecular_function /// nucleus /// biological_process /// Wnt receptor signaling pathway /// regulation of transcription
7965964	0.917106	1.88832	8.81357	5.21378	4.56273e-05	0.00336118	1.94271	SLC41A2	solute carrier family 41, member 2	plasma membrane /// cation transport /// cation transmembrane transporter activity /// integral to membrane /// magnesium ion binding
8001317	0.913403	1.88348	8.68876	6.81025	1.46308e-06	0.000188822	5.36318	N4BP1	NEDD4 binding protein 1	nucleus
7958828	0.89816	1.86369	9.52116	7.60515	2.98435e-07	5.01869e-05	6.94185	TRAFD1	TRAF-type zinc finger domain containing 1	protein binding /// intracellular /// zinc ion binding /// metal ion binding
7979721	0.894251	1.85865	6.80687	5.42252	2.86109e-05	0.0023011	2.40617	C14orf83 /// TMEM229B	chromosome 14 open reading frame 83 /// transmembrane protein 229B	membrane /// integral to membrane
7983157	0.889892	1.85304	10.3781	10.6424	1.45216e-09	5.4946e-07	12.1719	TMEM62	transmembrane protein 62	membrane /// integral to membrane
7927732	0.884118	1.84564	9.42967	4.82028	0.0001112	0.00703919	1.05969	ARID5B	AT rich interactive domain 5B (MRF1-like)	kidney development /// DNA binding /// intracellular /// nucleus /// nitrogen compound metabolic process /// post-embryonic development /// fibroblast migration /// transcription repressor activity /// multicellular organism growth /// regulation of transcription /// negative regulation of transcription, DNA-dependent /// platelet-derived growth factor receptor signaling pathway /// muscle organ …
8007188	0.883628	1.84501	10.8484	6.32127	4.05726e-06	0.000434388	4.3487	CNP	2',3'-cyclic nucleotide 3' phosphodiesterase	microtubule cytoskeleton organization /// 2',3'-cyclic-nucleotide 3'-phosphodiesterase activity /// extracellular space /// intracellular /// membrane fraction /// cytoplasm /// synaptic transmission /// axonogenesis /// adult locomotory behavior /// cyclic nucleotide catabolic process /// membrane /// RNA metabolic process /// hydrolase activity /// intrinsic to membrane /// melanosome /// 2',3'…
7913655	0.87757	1.83728	11.3712	9.36643	1.1863e-08	3.26449e-06	10.1238	ID3	inhibitor of DNA binding 3, dominant negative helix-loop-helix protein	negative regulation of transcription from RNA polymerase II promoter /// transcription corepressor activity /// nucleus /// regulation of DNA replication /// multicellular organismal development /// heart development /// transcription factor binding /// response to wounding /// negative regulation of transcription /// transcription repressor activity /// protein domain specific binding /// neuron…
7915543	0.876322	1.83569	9.00181	5.09346	5.98275e-05	0.00423846	1.67388	SLC6A9	solute carrier family 6 (neurotransmitter transporter, glycine), member 9	neurotransmitter:sodium symporter activity /// membrane fraction /// integral to plasma membrane /// transport /// neurotransmitter transport /// amino acid transport /// symporter activity /// glycine:sodium symporter activity /// glycine transport /// membrane /// integral to plasma membrane
8063955	0.875813	1.83504	9.63728	5.03194	6.87529e-05	0.00477926	1.53599	OGFR	opioid growth factor receptor	regulation of cell growth /// receptor activity /// opioid receptor activity /// cellular_component /// nucleus /// cytoplasm /// membrane
7909610	0.874567	1.83346	7.424	5.09875	5.91179e-05	0.00420609	1.68571	ATF3	activating transcription factor 3	transcription factor activity /// transcription corepressor activity /// protein binding /// nucleus /// nucleolus /// gluconeogenesis /// regulation of transcription, DNA-dependent /// positive regulation of cell proliferation /// identical protein binding /// sequence-specific DNA binding /// protein dimerization activity /// transcription factor activity /// nucleus
7934920	0.874125	1.8329	10.3348	7.97784	1.45835e-07	2.63905e-05	7.65122	LIPA	lipase A, lysosomal acid, cholesterol esterase	cell morphogenesis /// cytokine production /// sterol esterase activity /// lysosome /// fatty acid metabolic process /// inflammatory response /// cell proliferation /// lipid catabolic process /// sterol metabolic process /// lipase activity /// hydrolase activity /// lung development /// tissue remodeling /// homeostasis of number of cells within a tissue /// sterol esterase activity /// lysos…
8179322	0.871078	1.82903	12.1811	6.48277	2.88681e-06	0.000320408	4.6873	HSPA1B /// HSPA1A	heat shock 70kDa protein 1B /// heat shock 70kDa protein 1A	nucleotide binding /// protein binding /// protein binding /// ATP binding /// nucleus /// cytoplasm /// cytoplasm /// mitochondrion /// endoplasmic reticulum /// mRNA catabolic process /// anti-apoptosis /// response to unfolded protein /// negative regulation of cell proliferation /// inclusion body /// nuclear speck /// negative regulation of cell growth /// ribonucleoprotein complex /// ubiqu…
7969677	0.864313	1.82047	11.2188	6.62491	2.14562e-06	0.000251559	4.98244	MBNL2	muscleblind-like 2 (Drosophila)	RNA binding /// nucleus /// cytoplasm /// mRNA processing /// zinc ion binding /// regulation of RNA splicing /// metal ion binding
8104693	0.860999	1.8163	7.60394	8.28934	8.12966e-08	1.61225e-05	8.22907	PDZD2	PDZ domain containing 2	protein binding /// extracellular region /// nucleus /// cytoplasm /// endoplasmic reticulum /// cell-cell junction /// cell adhesion
8162276	0.859208	1.81404	9.62786	4.64638	0.000165477	0.00956459	0.666538	NFIL3	nuclear factor, interleukin 3 regulated	DNA binding /// transcription factor activity /// transcription corepressor activity /// nucleus /// regulation of transcription, DNA-dependent /// transcription from RNA polymerase II promoter /// immune response /// sequence-specific DNA binding /// protein dimerization activity /// rhythmic process /// transcription factor activity /// nucleus
8036908	0.858586	1.81326	8.03542	8.07459	1.21463e-07	2.24687e-05	7.83215	SERTAD3	SERTA domain containing 3	protein binding /// nucleus /// transcription activator activity /// negative regulation of cell growth /// positive regulation of transcription
7930577	0.858113	1.81267	9.03332	5.26865	4.03426e-05	0.00302543	2.0649	CASP7	caspase 7, apoptosis-related cysteine peptidase	release of cytochrome c from mitochondria /// cysteine-type endopeptidase activity /// protein binding /// soluble fraction /// nucleoplasm /// cytoplasm /// endoplasmic reticulum membrane /// cytosol /// proteolysis /// apoptosis /// heart development /// peptidase activity /// cysteine-type peptidase activity /// response to UV /// mitochondrial membrane /// cysteine-type endopeptidase activity…
8118310	0.854495	1.80813	12.1824	6.40759	3.38099e-06	0.000367188	4.5301	HSPA1B /// HSPA1A	heat shock 70kDa protein 1B /// heat shock 70kDa protein 1A	nucleotide binding /// protein binding /// protein binding /// ATP binding /// nucleus /// cytoplasm /// cytoplasm /// mitochondrion /// endoplasmic reticulum /// mRNA catabolic process /// anti-apoptosis /// response to unfolded protein /// negative regulation of cell proliferation /// inclusion body /// nuclear speck /// negative regulation of cell growth /// ribonucleoprotein complex /// ubiqu…
8113491	0.853337	1.80667	9.75374	5.50057	2.40575e-05	0.00200261	2.5784	STARD4	StAR-related lipid transfer (START) domain containing 4	lipid transport /// lipid binding
8047487	0.851699	1.80462	8.47308	5.41978	2.87862e-05	0.00230811	2.4001	FZD7	frizzled homolog 7 (Drosophila)	non-G-protein coupled 7TM receptor activity /// G-protein coupled receptor activity /// plasma membrane /// signal transduction /// G-protein coupled receptor protein signaling pathway /// multicellular organismal development /// integral to membrane /// Wnt receptor signaling pathway /// Wnt receptor activity /// plasma membrane /// integral to membrane
7970388	0.837247	1.78664	7.74657	5.63297	1.79555e-05	0.00156101	2.86918	LOC284232	ankyrin repeat domain 20 family, member A2 pseudogene	---
7926821	0.834182	1.78285	11.0157	5.28774	3.86537e-05	0.00291848	2.10736	MASTL	microtubule associated serine/threonine kinase-like	nucleotide binding /// protein serine/threonine kinase activity /// ATP binding /// protein amino acid phosphorylation /// transferase activity
8011480	0.829166	1.77666	8.45201	5.96764	8.64898e-06	0.000839607	3.59564	CAMKK1	calcium/calmodulin-dependent protein kinase kinase 1, alpha	nucleotide binding /// calmodulin-dependent protein kinase activity /// calmodulin binding /// ATP binding /// nucleus /// cytoplasm /// cytosol /// protein amino acid phosphorylation /// transferase activity /// calmodulin-dependent protein kinase activity
8148572	0.828987	1.77644	10.9244	6.9683	1.05936e-06	0.000146973	5.68413	LY6E	lymphocyte antigen 6 complex, locus E	in utero embryonic development /// plasma membrane /// integral to plasma membrane /// cell surface receptor linked signaling pathway /// adrenal gland development /// anchored to membrane /// organ growth /// norepinephrine metabolic process /// epinephrine secretion /// ventricular cardiac muscle tissue morphogenesis /// cell surface receptor linked signal transduction /// ventricular cardiac m…
8059413	0.826956	1.77394	11.4087	5.62738	1.8178e-05	0.00157623	2.85694	DOCK10	dedicator of cytokinesis 10	guanyl-nucleotide exchange factor activity /// GTP binding /// GTPase binding
7914603	0.820651	1.7662	10.0356	6.79248	1.51749e-06	0.000192854	5.32688	RNF19B	ring finger protein 19B	protein binding /// immune response /// zinc ion binding /// membrane /// integral to membrane /// ligase activity /// metal ion binding /// protein binding /// modification-dependent protein catabolic process
7928308	0.818048	1.76302	7.72809	5.12627	5.55598e-05	0.00398701	1.74729	DDIT4	DNA-damage-inducible transcript 4	response to hypoxia /// intracellular /// cytoplasm /// apoptosis /// negative regulation of signal transduction
8090214	0.817584	1.76245	8.06399	6.65075	2.0335e-06	0.000241819	5.03582	SLC12A8	solute carrier family 12 (potassium/chloride transporters), member 8	ion transport /// potassium ion transport /// symporter activity /// membrane /// integral to membrane /// transmembrane transport /// potassium ion binding /// chloride ion binding
7983779	0.81396	1.75803	5.98906	4.67857	0.000153716	0.0090589	0.739408	UNC13C	unc-13 homolog C (C. elegans)	cytoplasm /// plasma membrane /// exocytosis /// synaptic transmission /// cell junction /// presynaptic membrane /// synapse /// metal ion binding /// intracellular signaling cascade /// zinc ion binding /// diacylglycerol binding
7971015	0.812593	1.75637	8.20498	6.85585	1.33247e-06	0.000173989	5.45615	SMAD9	SMAD family member 9	response to hypoxia /// Mullerian duct regression /// transcription factor activity /// protein binding /// intracellular /// nucleus /// nucleoplasm /// transcription factor complex /// cytoplasm /// cytosol /// regulation of transcription, DNA-dependent /// transforming growth factor beta receptor signaling pathway /// BMP signaling pathway /// BMP signaling pathway /// transforming growth fact…
7899455	0.812114	1.75578	11.7763	5.3346	3.48073e-05	0.0027079	2.21144	PHACTR4	phosphatase and actin regulator 4	actin binding /// phosphoprotein phosphatase inhibitor activity
8150186	0.810065	1.75329	7.14759	5.14491	5.32742e-05	0.00383955	1.78896	RNF122	ring finger protein 122	protein binding /// endoplasmic reticulum /// Golgi apparatus /// zinc ion binding /// membrane /// integral to membrane /// metal ion binding
8018975	0.807744	1.75047	11.2791	8.88433	2.75744e-08	6.70179e-06	9.29522	LGALS3BP	lectin, galactoside-binding, soluble, 3 binding protein	scavenger receptor activity /// protein binding /// extracellular region /// proteinaceous extracellular matrix /// extracellular space /// nucleus /// cellular defense response /// cell adhesion /// signal transduction /// membrane /// intracellular membrane-bounded organelle /// scavenger receptor activity
7908178	0.804622	1.74669	7.85319	5.6464	1.74323e-05	0.00153108	2.89859	C1orf26	chromosome 1 open reading frame 26	---
8014603	0.797841	1.7385	8.8903	6.28097	4.41924e-06	0.000467134	4.26368	LOC100134348 /// TBC1D3P2 /// TBC1D3F /// TBC1D3C /// TBC1D3G /// TBC1D3B /// TBC1D3 /// TBC1D3H	similar to TBC1 domain family member 3 (Rab GTPase-activating protein PRC17) (Prostate cancer gene 17 protein) (TRE17 alpha protein) /// TBC1 domain family, member 3 pseudogene 2 /// TBC1 domain family, member 3F /// TBC1 domain family, member 3C /// TBC1 domain family, member 3G /// TBC1 domain family, member 3B /// TBC1 domain family, member 3 /// TBC1 domain family, member 3H	GTPase activator activity /// Rab GTPase activator activity /// intracellular /// regulation of Rab GTPase activity
8069517	0.797836	1.73849	7.94417	5.26528	4.06487e-05	0.00303471	2.0574	---	---	---
8006746	0.795184	1.7353	8.98255	5.83584	1.15135e-05	0.00107385	3.31107	LOC100134348 /// TBC1D3P2 /// TBC1D3F /// TBC1D3B /// TBC1D3C /// TBC1D3G /// TBC1D3 /// TBC1D3H	similar to TBC1 domain family member 3 (Rab GTPase-activating protein PRC17) (Prostate cancer gene 17 protein) (TRE17 alpha protein) /// TBC1 domain family, member 3 pseudogene 2 /// TBC1 domain family, member 3F /// TBC1 domain family, member 3B /// TBC1 domain family, member 3C /// TBC1 domain family, member 3G /// TBC1 domain family, member 3 /// TBC1 domain family, member 3H	GTPase activator activity /// Rab GTPase activator activity /// intracellular /// regulation of Rab GTPase activity
7899350	0.792957	1.73262	8.60533	6.76456	1.6072e-06	0.000202708	5.26977	FAM76A	family with sequence similarity 76, member A	---
7913768	0.792089	1.73158	6.93399	8.15478	1.04476e-07	2.04633e-05	7.98114	IL22RA1	interleukin 22 receptor, alpha 1	receptor activity /// interferon receptor activity /// blood coagulation /// biological_process /// membrane /// integral to membrane /// cytokine receptor activity /// membrane
7979757	0.788091	1.72679	9.21747	5.80045	1.24372e-05	0.00115034	3.23432	ZFYVE26	zinc finger, FYVE domain containing 26	cell death /// zinc ion binding /// metal ion binding
7926679	0.784532	1.72253	8.30249	4.89266	9.43026e-05	0.00622655	1.22287	KIAA1217	KIAA1217	molecular_function /// cytoplasm /// multicellular organismal development /// embryonic skeletal system development
8156861	0.783697	1.72154	9.50799	7.22494	6.31636e-07	9.43121e-05	6.19785	STX17	syntaxin 17	SNAP receptor activity /// nucleolus /// endoplasmic reticulum /// intracellular protein transport /// membrane /// integral to membrane /// vesicle-mediated transport
8043244	0.779365	1.71637	7.28693	6.46865	2.97358e-06	0.000327852	4.65784	ATOH8	atonal homolog 8 (Drosophila)	DNA binding /// nucleus /// multicellular organismal development /// nervous system development /// cell differentiation /// transcription regulator activity /// regulation of transcription
8046124	0.778745	1.71564	5.49309	6.93822	1.12622e-06	0.0001556	5.62331	DHRS9	dehydrogenase/reductase (SDR family) member 9	alcohol dehydrogenase (NAD) activity /// retinol dehydrogenase activity /// binding /// endoplasmic reticulum /// endoplasmic reticulum membrane /// microsome /// androgen metabolic process /// membrane /// oxidoreductase activity /// racemase and epimerase activity /// integral to endoplasmic reticulum membrane /// epithelial cell differentiation /// progesterone metabolic process /// retinol me…
8094911	0.765257	1.69967	10.0424	5.34112	3.43042e-05	0.00269393	2.2259	ATP10D	ATPase, class V, type 10D	nucleotide binding /// magnesium ion binding /// phospholipid-translocating ATPase activity /// ATP binding /// ATP biosynthetic process /// cation transport /// metabolic process /// ATPase activity, coupled to transmembrane movement of ions, phosphorylative mechanism /// phospholipid transport /// membrane /// integral to membrane /// hydrolase activity /// hydrolase activity, acting on acid an…
8014633	0.758634	1.69189	8.90547	5.66356	1.67868e-05	0.00149053	2.9361	TBC1D3F /// TBC1D3B /// TBC1D3C /// TBC1D3G /// TBC1D3 /// TBC1D3H	TBC1 domain family, member 3F /// TBC1 domain family, member 3B /// TBC1 domain family, member 3C /// TBC1 domain family, member 3G /// TBC1 domain family, member 3 /// TBC1 domain family, member 3H	GTPase activator activity /// Rab GTPase activator activity /// intracellular /// regulation of Rab GTPase activity
7945371	0.754239	1.68674	12.1759	7.00039	9.92554e-07	0.000140038	5.74887	IFITM3	interferon induced transmembrane protein 3 (1-8U)	plasma membrane /// immune response /// response to biotic stimulus /// integral to membrane
7909661	0.75301	1.68531	9.52574	5.07474	6.24115e-05	0.00440279	1.63194	RPS6KC1	ribosomal protein S6 kinase, 52kDa, polypeptide 1	nucleotide binding /// protein serine/threonine kinase activity /// protein binding /// ATP binding /// cytoplasm /// early endosome /// protein amino acid phosphorylation /// cell communication /// signal transduction /// membrane /// transferase activity /// phosphoinositide binding /// protein serine/threonine kinase activity
7980958	0.752047	1.68418	10.4652	6.40772	3.38004e-06	0.000367188	4.53038	LGMN	legumain	cysteine-type endopeptidase activity /// protein serine/threonine kinase activity /// cytoplasm /// lysosome /// late endosome /// proteolysis /// peptidase activity /// negative regulation of multicellular organism growth /// intracellular membrane-bounded organelle /// apical part of cell
8093230	0.751815	1.68391	9.89676	6.79594	1.50673e-06	0.000192221	5.33396	KIAA0226	KIAA0226	---
8019716	0.74625	1.67743	8.92082	5.43958	2.75455e-05	0.00223703	2.44387	LOC100134348 /// TBC1D3P2 /// TBC1D3F /// TBC1D3B /// TBC1D3C /// TBC1D3G /// TBC1D3 /// TBC1D3H	similar to TBC1 domain family member 3 (Rab GTPase-activating protein PRC17) (Prostate cancer gene 17 protein) (TRE17 alpha protein) /// TBC1 domain family, member 3 pseudogene 2 /// TBC1 domain family, member 3F /// TBC1 domain family, member 3B /// TBC1 domain family, member 3C /// TBC1 domain family, member 3G /// TBC1 domain family, member 3 /// TBC1 domain family, member 3H	GTPase activator activity /// Rab GTPase activator activity /// intracellular /// regulation of Rab GTPase activity
7954029	0.745559	1.67662	9.7316	5.62412	1.83087e-05	0.00158344	2.84982	CDKN1B	cyclin-dependent kinase inhibitor 1B (p27, Kip1)	regulation of cyclin-dependent protein kinase activity /// G1/S transition of mitotic cell cycle /// protein kinase inhibitor activity /// cyclin-dependent protein kinase inhibitor activity /// transforming growth factor beta receptor, cytoplasmic mediator activity /// protein binding /// nucleus /// cytoplasm /// cytosol /// induction of apoptosis /// cell cycle /// cell cycle arrest /// negativ…
8014420	0.742592	1.67318	8.86547	5.50815	2.36568e-05	0.00197914	2.59509	LOC100134348 /// TBC1D3P2 /// TBC1D3F /// TBC1D3B /// TBC1D3C /// TBC1D3G /// TBC1D3 /// TBC1D3H	similar to TBC1 domain family member 3 (Rab GTPase-activating protein PRC17) (Prostate cancer gene 17 protein) (TRE17 alpha protein) /// TBC1 domain family, member 3 pseudogene 2 /// TBC1 domain family, member 3F /// TBC1 domain family, member 3B /// TBC1 domain family, member 3C /// TBC1 domain family, member 3G /// TBC1 domain family, member 3 /// TBC1 domain family, member 3H	GTPase activator activity /// Rab GTPase activator activity /// intracellular /// regulation of Rab GTPase activity
7976216	0.742344	1.67289	8.91582	6.60096	2.25518e-06	0.000260732	4.93291	C14orf159	chromosome 14 open reading frame 159	mitochondrion
8030339	0.72393	1.65168	9.15461	6.79014	1.52481e-06	0.000193048	5.3221	FLT3LG	fms-related tyrosine kinase 3 ligand	receptor binding /// cytokine activity /// extracellular region /// extracellular space /// soluble fraction /// plasma membrane /// signal transduction /// positive regulation of cell proliferation /// cell surface /// integral to membrane /// lymphocyte differentiation /// receptor tyrosine kinase binding /// intrinsic to external side of plasma membrane /// protein homodimerization activity //…
8123893	0.720784	1.64808	6.39393	5.19247	4.78658e-05	0.0034875	1.89518	MAK	male germ cell-associated kinase	nucleotide binding /// protein kinase activity /// cyclin-dependent protein kinase activity /// ATP binding /// protein amino acid phosphorylation /// multicellular organismal development /// spermatogenesis /// transferase activity /// cell differentiation
8014437	0.720485	1.64774	8.86891	5.42883	2.82119e-05	0.00227811	2.42012	LOC100134348 /// TBC1D3P2 /// TBC1D3F /// TBC1D3B /// TBC1D3C /// TBC1D3G /// TBC1D3 /// TBC1D3H	similar to TBC1 domain family member 3 (Rab GTPase-activating protein PRC17) (Prostate cancer gene 17 protein) (TRE17 alpha protein) /// TBC1 domain family, member 3 pseudogene 2 /// TBC1 domain family, member 3F /// TBC1 domain family, member 3B /// TBC1 domain family, member 3C /// TBC1 domain family, member 3G /// TBC1 domain family, member 3 /// TBC1 domain family, member 3H	GTPase activator activity /// Rab GTPase activator activity /// intracellular /// regulation of Rab GTPase activity
8117861	0.719489	1.6466	7.52824	6.87808	1.27322e-06	0.000168232	5.50136	HLA-L /// HLA-L	major histocompatibility complex, class I, L (pseudogene) /// major histocompatibility complex, class I, L, pseudogene	---
8179080	0.719489	1.6466	7.52824	6.87808	1.27322e-06	0.000168232	5.50136	HLA-L /// HLA-L	major histocompatibility complex, class I, L (pseudogene) /// major histocompatibility complex, class I, L, pseudogene	---
8047403	0.717728	1.64459	6.69529	5.94824	9.01974e-06	0.000870522	3.55389	CASP10	caspase 10, apoptosis-related cysteine peptidase	cysteine-type endopeptidase activity /// protein binding /// proteolysis /// induction of apoptosis /// peptidase activity /// induction of apoptosis by extracellular signals /// identical protein binding /// regulation of apoptosis /// positive regulation of I-kappaB kinase/NF-kappaB cascade /// cysteine-type endopeptidase activity
8081710	0.714089	1.64045	5.87811	5.55704	2.12301e-05	0.00180792	2.70266	SIDT1	SID1 transmembrane family, member 1	membrane /// integral to membrane
8011599	0.713902	1.64023	9.64306	8.15035	1.05348e-07	2.05133e-05	7.97293	ANKFY1	ankyrin repeat and FYVE domain containing 1	protein binding /// cytoplasm /// endosome /// zinc ion binding /// endosome membrane /// membrane /// metal ion binding
8178977	0.711725	1.63776	11.2923	8.43256	6.24079e-08	1.2875e-05	8.49018	TAPBP	TAP binding protein (tapasin)	Golgi membrane /// protein binding /// endoplasmic reticulum /// endoplasmic reticulum membrane /// microsome /// protein complex assembly /// retrograde vesicle-mediated transport, Golgi to ER /// immune response /// peptide antigen-transporting ATPase activity /// membrane /// integral to membrane /// antigen processing and presentation of endogenous peptide antigen via MHC class I /// MHC clas…
7984353	0.70975	1.63552	8.22812	6.99757	9.98239e-07	0.000140246	5.74319	SMAD6	SMAD family member 6	transcription factor activity /// protein binding /// intracellular /// nucleus /// transcription factor complex /// cytoplasm /// cytosol /// regulation of transcription, DNA-dependent /// immune response /// zygotic specification of dorsal/ventral axis /// negative regulation of SMAD protein complex assembly /// BMP signaling pathway /// negative regulation of transforming growth factor beta re…
8019655	0.70792	1.63345	8.89402	5.60574	1.90658e-05	0.0016404	2.80954	TBC1D3F /// TBC1D3C /// TBC1D3G /// TBC1D3B /// TBC1D3 /// TBC1D3H	TBC1 domain family, member 3F /// TBC1 domain family, member 3C /// TBC1 domain family, member 3G /// TBC1 domain family, member 3B /// TBC1 domain family, member 3 /// TBC1 domain family, member 3H	GTPase activator activity /// Rab GTPase activator activity /// intracellular /// regulation of Rab GTPase activity
8032608	0.705865	1.63112	9.85837	4.93223	8.6191e-05	0.00576285	1.31197	C19orf28	chromosome 19 open reading frame 28	membrane /// integral to membrane /// transmembrane transport /// transport
8014376	0.701505	1.6262	8.83772	5.69044	1.58241e-05	0.00141259	2.99482	LOC100134348 /// TBC1D3P2 /// TBC1D3F /// TBC1D3B /// TBC1D3C /// TBC1D3G /// TBC1D3 /// TBC1D3H	similar to TBC1 domain family member 3 (Rab GTPase-activating protein PRC17) (Prostate cancer gene 17 protein) (TRE17 alpha protein) /// TBC1 domain family, member 3 pseudogene 2 /// TBC1 domain family, member 3F /// TBC1 domain family, member 3B /// TBC1 domain family, member 3C /// TBC1 domain family, member 3G /// TBC1 domain family, member 3 /// TBC1 domain family, member 3H	GTPase activator activity /// Rab GTPase activator activity /// intracellular /// regulation of Rab GTPase activity
8125713	0.695863	1.61985	10.4119	8.68566	3.93653e-08	8.8771e-06	8.94466	TAPBP	TAP binding protein (tapasin)	Golgi membrane /// protein binding /// endoplasmic reticulum /// endoplasmic reticulum membrane /// microsome /// protein complex assembly /// retrograde vesicle-mediated transport, Golgi to ER /// immune response /// peptide antigen-transporting ATPase activity /// membrane /// integral to membrane /// antigen processing and presentation of endogenous peptide antigen via MHC class I /// MHC clas…
8126629	0.694731	1.61858	10.0147	5.65986	1.69239e-05	0.00149871	2.92801	GTPBP2	GTP binding protein 2	nucleotide binding /// GTPase activity /// GTP binding
8129573	0.693579	1.61729	7.47932	5.96541	8.69081e-06	0.000841215	3.59084	MOXD1	monooxygenase, DBH-like 1	monooxygenase activity /// dopamine beta-monooxygenase activity /// copper ion binding /// endoplasmic reticulum /// endoplasmic reticulum membrane /// histidine catabolic process /// catecholamine metabolic process /// cellular process /// membrane /// integral to membrane /// metal ion binding /// oxidation reduction
7971197	0.692182	1.61573	10.778	6.54617	2.52811e-06	0.000285351	4.81928	ELF1	E74-like factor 1 (ets domain transcription factor)	regulation of cytokine production /// transcription factor activity /// protein binding /// nucleus /// nucleus /// cytoplasm /// regulation of transcription, DNA-dependent /// transcription activator activity /// transcription repressor activity /// sequence-specific DNA binding /// positive regulation of transcription from RNA polymerase II promoter /// negative regulation of T cell receptor si…
7905067	0.691662	1.61514	9.60555	4.68976	0.000149827	0.00890856	0.76474	HIST2H4A /// HIST2H4B	histone cluster 2, H4a /// histone cluster 2, H4b	nucleosome /// DNA binding /// protein binding /// nucleus /// nucleoplasm /// chromosome /// chromatin organization /// nucleosome assembly /// negative regulation of megakaryocyte differentiation /// phosphoinositide-mediated signaling
7919627	0.691662	1.61514	9.60555	4.68976	0.000149827	0.00890856	0.76474	HIST2H4A /// HIST2H4B	histone cluster 2, H4a /// histone cluster 2, H4b	nucleosome /// DNA binding /// protein binding /// nucleus /// nucleoplasm /// chromosome /// chromatin organization /// nucleosome assembly /// negative regulation of megakaryocyte differentiation /// phosphoinositide-mediated signaling
8018922	0.688563	1.61168	9.42644	6.47034	2.96304e-06	0.000327775	4.66137	CYTH1	cytohesin 1	ARF guanyl-nucleotide exchange factor activity /// protein binding /// intracellular /// cytoplasm /// plasma membrane /// vesicle-mediated transport /// regulation of cell adhesion /// regulation of ARF protein signal transduction /// ARF guanyl-nucleotide exchange factor activity
8151447	0.686074	1.6089	7.91032	4.87265	9.86947e-05	0.00646897	1.17779	IL7	interleukin 7	T cell lineage commitment /// cytokine activity /// interleukin-7 receptor binding /// protein binding /// extracellular region /// extracellular space /// anti-apoptosis /// humoral immune response /// cell-cell signaling /// growth factor activity /// positive regulation of cell proliferation /// organ morphogenesis /// regulation of gene expression /// negative regulation of cell growth /// po…
8125483	0.685611	1.60838	9.99392	8.42452	6.33361e-08	1.29381e-05	8.47561	HLA-DOB /// TAP2	major histocompatibility complex, class II, DO beta /// transporter 2, ATP-binding cassette, sub-family B (MDR/TAP)	nucleotide binding /// homoaconitate hydratase activity /// transporter activity /// protein binding /// ATP binding /// nucleus /// endoplasmic reticulum /// endoplasmic reticulum lumen /// endoplasmic reticulum membrane /// cytosol /// protein complex assembly /// intracellular protein transport /// immune response /// peptide transporter activity /// peptide antigen-transporting ATPase activit…
8180166	0.682762	1.60521	11.4552	8.09906	1.15995e-07	2.16982e-05	7.87772	TAPBP	TAP binding protein (tapasin)	Golgi membrane /// protein binding /// endoplasmic reticulum /// endoplasmic reticulum membrane /// microsome /// protein complex assembly /// retrograde vesicle-mediated transport, Golgi to ER /// immune response /// peptide antigen-transporting ATPase activity /// membrane /// integral to membrane /// antigen processing and presentation of endogenous peptide antigen via MHC class I /// MHC clas…
8178841	0.678429	1.6004	9.8242	7.65196	2.72486e-07	4.65281e-05	7.03203	HLA-DOB /// TAP2	major histocompatibility complex, class II, DO beta /// transporter 2, ATP-binding cassette, sub-family B (MDR/TAP)	nucleotide binding /// homoaconitate hydratase activity /// transporter activity /// protein binding /// ATP binding /// nucleus /// endoplasmic reticulum /// endoplasmic reticulum lumen /// endoplasmic reticulum membrane /// cytosol /// protein complex assembly /// intracellular protein transport /// immune response /// peptide transporter activity /// peptide antigen-transporting ATPase activit…
8180034	0.675595	1.59725	10.0039	7.13495	7.56431e-07	0.000110955	6.01878	HLA-DOB /// TAP2	major histocompatibility complex, class II, DO beta /// transporter 2, ATP-binding cassette, sub-family B (MDR/TAP)	nucleotide binding /// homoaconitate hydratase activity /// transporter activity /// protein binding /// ATP binding /// nucleus /// endoplasmic reticulum /// endoplasmic reticulum lumen /// endoplasmic reticulum membrane /// cytosol /// protein complex assembly /// intracellular protein transport /// immune response /// peptide transporter activity /// peptide antigen-transporting ATPase activit…
8014397	0.674667	1.59623	8.53204	5.33993	3.43954e-05	0.00269473	2.22327	LOC100134348 /// TBC1D3P2 /// TBC1D3F /// TBC1D3B /// TBC1D3C /// TBC1D3G /// TBC1D3 /// TBC1D3H	similar to TBC1 domain family member 3 (Rab GTPase-activating protein PRC17) (Prostate cancer gene 17 protein) (TRE17 alpha protein) /// TBC1 domain family, member 3 pseudogene 2 /// TBC1 domain family, member 3F /// TBC1 domain family, member 3B /// TBC1 domain family, member 3C /// TBC1 domain family, member 3G /// TBC1 domain family, member 3 /// TBC1 domain family, member 3H	GTPase activator activity /// Rab GTPase activator activity /// intracellular /// regulation of Rab GTPase activity
8074399	0.669029	1.59	8.66197	5.54415	2.18441e-05	0.00184605	2.67432	CLTCL1	clathrin, heavy chain-like 1	signal transducer activity /// structural molecule activity /// protein binding /// intracellular protein transport /// receptor-mediated endocytosis /// anatomical structure morphogenesis /// membrane /// vesicle-mediated transport /// clathrin coat of trans-Golgi network vesicle /// clathrin coat of coated pit /// cytoplasmic vesicle membrane /// cytoplasmic vesicle
8061073	0.665527	1.58615	7.71846	4.78166	0.00012144	0.00754401	0.972504	---	---	---
8153609	0.659788	1.57985	8.54241	5.93251	9.33234e-06	0.000892928	3.51999	PARP10	poly (ADP-ribose) polymerase family, member 10	NAD+ ADP-ribosyltransferase activity /// nucleus /// nucleolus /// cytoplasm /// transferase activity, transferring glycosyl groups
7954055	0.659709	1.57976	7.75896	4.68029	0.00015311	0.00903919	0.743312	APOLD1	apolipoprotein L domain containing 1	angiogenesis /// response to hypoxia /// extracellular region /// plasma membrane /// lipid transport /// multicellular organismal development /// lipid binding /// integral to membrane /// cell differentiation /// endothelial cell activation /// lipoprotein metabolic process /// regulation of endothelial cell differentiation
7919699	0.650424	1.56963	8.06916	5.30965	3.68045e-05	0.0028302	2.15604	OTUD7B	OTU domain containing 7B	DNA binding /// ubiquitin thiolesterase activity /// protein binding /// nucleus /// cytoplasm /// peptidase activity /// cysteine-type peptidase activity /// zinc ion binding /// protein deubiquitination /// negative regulation of I-kappaB kinase/NF-kappaB cascade /// metal ion binding /// modification-dependent protein catabolic process
7902043	0.648678	1.56773	7.58288	5.10824	5.78654e-05	0.00412579	1.70695	DNAJC6 /// LOC645195	DnaJ (Hsp40) homolog, subfamily C, member 6 /// hypothetical LOC645195	protein tyrosine phosphatase activity /// post-Golgi vesicle-mediated transport /// cellular membrane organization /// hydrolase activity /// SH3 domain binding /// heat shock protein binding
8091698	0.646421	1.56528	8.85021	7.74645	2.26984e-07	3.916e-05	7.21311	SHOX2	short stature homeobox 2	skeletal system development /// transcription factor activity /// nucleus /// regulation of transcription, DNA-dependent /// multicellular organismal development /// nervous system development /// heart development /// sequence-specific DNA binding
8089299	0.642203	1.56071	11.3151	8.33544	7.46415e-08	1.50627e-05	8.31344	CD47	CD47 molecule	protein binding /// plasma membrane /// integral to plasma membrane /// cell adhesion /// integrin-mediated signaling pathway /// positive regulation of cell proliferation /// positive regulation of cell-cell adhesion /// positive regulation of T cell activation /// thrombospondin receptor activity /// plasma membrane
8047467	0.640268	1.55862	6.07629	5.29257	3.82383e-05	0.00289368	2.11809	PFTK2 /// CDK15	PFTAIRE protein kinase 2 /// cyclin-dependent kinase 15	nucleotide binding /// cyclin-dependent protein kinase activity /// protein binding /// ATP binding /// protein amino acid phosphorylation /// transferase activity /// metal ion binding /// magnesium ion binding
7952914	0.637888	1.55605	9.39241	5.199	4.71684e-05	0.00345939	1.90975	CCDC77	coiled-coil domain containing 77	---
8097080	0.637075	1.55517	6.36954	5.51295	2.34062e-05	0.00196312	2.60567	SYNPO2	synaptopodin 2	actin binding /// protein binding /// nucleus /// cytoplasm
8059111	0.635199	1.55315	9.00432	5.01285	7.17892e-05	0.00492737	1.49315	ATG9A /// ABCB6	ATG9 autophagy related 9 homolog A (S. cerevisiae) /// ATP-binding cassette, sub-family B (MDR/TAP), member 6	nucleotide binding /// ATP binding /// mitochondrion /// mitochondrial envelope /// mitochondrial outer membrane /// transport /// cellular iron ion homeostasis /// membrane /// integral to membrane /// ATPase activity /// ATPase activity, coupled to transmembrane movement of substances /// ATP-binding cassette (ABC) transporter complex /// transmembrane transport /// autophagic vacuole formation…
8114814	0.633105	1.5509	10.5833	5.29326	3.81791e-05	0.00289368	2.11963	NR3C1	nuclear receptor subfamily 3, group C, member 1 (glucocorticoid receptor)	transcription factor activity /// glucocorticoid receptor activity /// steroid binding /// protein binding /// nucleus /// nucleolus /// cytoplasm /// mitochondrial matrix /// transcription, DNA-dependent /// regulation of transcription, DNA-dependent /// transcription from RNA polymerase II promoter /// signal transduction /// zinc ion binding /// chromatin modification /// sequence-specific DNA…
7919314	0.632794	1.55057	5.74766	6.13242	6.06639e-06	0.000613959	3.94849	FMO5	flavin containing monooxygenase 5	monooxygenase activity /// flavin-containing monooxygenase activity /// endoplasmic reticulum /// microsome /// biological_process /// membrane /// integral to membrane /// intrinsic to endoplasmic reticulum membrane /// FAD binding /// NADP or NADPH binding /// oxidation reduction
7913582	0.627039	1.54439	9.34991	4.82245	0.00011065	0.00701777	1.06459	ZNF436 /// C1orf213	zinc finger protein 436 /// chromosome 1 open reading frame 213	DNA binding /// intracellular /// nucleus /// regulation of transcription, DNA-dependent /// zinc ion binding /// metal ion binding
8178833	0.62522	1.54245	6.84957	4.98019	7.73026e-05	0.00522098	1.41981	HLA-DOB /// TAP2	major histocompatibility complex, class II, DO beta /// transporter 2, ATP-binding cassette, sub-family B (MDR/TAP)	antigen processing and presentation of peptide or polysaccharide antigen via MHC class II /// intracellular /// lysosome /// plasma membrane /// immune response /// integral to membrane /// MHC class II receptor activity /// MHC class II protein complex /// nucleotide binding /// homoaconitate hydratase activity /// transporter activity /// protein binding /// ATP binding /// nucleus /// endoplas…
8135064	0.616744	1.53341	8.7192	4.7162	0.000141033	0.0085192	0.824545	TRIM56	tripartite motif-containing 56	protein binding /// intracellular /// zinc ion binding /// metal ion binding
7985777	0.615854	1.53246	8.22517	4.68123	0.00015278	0.00903919	0.745447	ISG20	interferon stimulated exonuclease gene 20kDa	3'-5'-exoribonuclease activity /// DNA catabolic process, exonucleolytic /// RNA binding /// exonuclease activity /// intracellular /// nucleus /// nucleoplasm /// RNA catabolic process /// cell proliferation /// single-stranded DNA specific 3'-5' exodeoxyribonuclease activity /// exoribonuclease II activity /// response to virus /// PML body /// hydrolase activity /// metal ion binding /// manga…
8059222	0.613678	1.53016	9.78327	6.88842	1.24662e-06	0.000166701	5.52235	DNPEP	aspartyl aminopeptidase	aminopeptidase activity /// protein binding /// cytoplasm /// vacuole /// proteolysis /// peptide metabolic process /// peptidase activity /// metallopeptidase activity /// zinc ion binding /// metal ion binding /// aminopeptidase activity /// cytoplasm
8141803	0.611144	1.52747	8.03832	6.57702	2.37049e-06	0.000270309	4.88331	POLR2J4 /// LOC100286937 /// LOC100132214 /// RASA4 /// RASA4P /// RASA4B	polymerase (RNA) II (DNA directed) polypeptide J4, pseudogene /// similar to HSPC047 protein /// similar to calcium-promoted Ras inactivator /// RAS p21 protein activator 4 /// RAS p21 protein activator 4 pseudogene /// RAS p21 protein activator 4B	GTPase activator activity /// intracellular /// cytoplasm /// cytosol /// plasma membrane /// metal ion binding /// regulation of small GTPase mediated signal transduction /// intracellular signaling cascade /// zinc ion binding
8081375	0.60836	1.52453	9.36579	4.92584	8.74512e-05	0.00580052	1.29759	FAM55C	family with sequence similarity 55, member C	extracellular region
8013479	0.600322	1.51605	8.74994	4.99786	7.42684e-05	0.00507786	1.4595	CCDC144A /// CCDC144B /// LOC100134159 /// CCDC144NL /// CCDC144C	coiled-coil domain containing 144A /// coiled-coil domain containing 144B /// similar to Coiled-coil domain containing 144B /// coiled-coil domain containing 144 family, N-terminal like /// coiled-coil domain containing 144C	---
8107066	0.600286	1.51602	11.0839	4.85312	0.000103181	0.00667113	1.13377	LNPEP	leucyl/cystinyl aminopeptidase	aminopeptidase activity /// protein binding /// extracellular region /// intracellular /// membrane fraction /// microsome /// plasma membrane /// integral to plasma membrane /// proteolysis /// cell-cell signaling /// female pregnancy /// peptidase activity /// metallopeptidase activity /// zinc ion binding /// protein catabolic process /// metal ion binding /// perinuclear region of cytoplasm /…
8121277	0.597063	1.51263	9.47801	5.15066	5.25876e-05	0.00379829	1.80183	AIM1	absent in melanoma 1	molecular_function /// sugar binding /// cellular_component /// biological_process
8180232	0.59556	1.51106	7.13545	4.99529	7.47014e-05	0.00508657	1.45374	---	---	---
8017173	0.590575	1.50585	7.91447	5.52687	2.26956e-05	0.00190832	2.63631	LOC100134348 /// TBC1D3P2 /// TBC1D3F /// TBC1D3C /// TBC1D3G /// TBC1D3B /// TBC1D3 /// DHX40P1 /// TBC1D3H	similar to TBC1 domain family member 3 (Rab GTPase-activating protein PRC17) (Prostate cancer gene 17 protein) (TRE17 alpha protein) /// TBC1 domain family, member 3 pseudogene 2 /// TBC1 domain family, member 3F /// TBC1 domain family, member 3C /// TBC1 domain family, member 3G /// TBC1 domain family, member 3B /// TBC1 domain family, member 3 /// DEAH (Asp-Glu-Ala-His) box polypeptide 40 pseud…	GTPase activator activity /// Rab GTPase activator activity /// intracellular /// regulation of Rab GTPase activity
7957551	0.584345	1.49936	8.12214	5.4901	2.46223e-05	0.00204451	2.55534	SOCS2	suppressor of cytokine signaling 2	regulation of cell growth /// SH3/SH2 adaptor activity /// growth hormone receptor binding /// prolactin receptor binding /// insulin-like growth factor receptor binding /// protein binding /// cytoplasm /// anti-apoptosis /// JAK-STAT cascade /// aging /// JAK pathway signal transduction adaptor activity /// regulation of signal transduction /// negative regulation of signal transduction /// res…
8137414	0.584296	1.49931	10.8329	6.82593	1.41673e-06	0.000183552	5.39519	NUB1	negative regulator of ubiquitin-like proteins 1	molecular_function /// cellular_component /// nucleus /// biological_process
8063382	0.583652	1.49864	8.03377	5.91304	9.73469e-06	0.000923464	3.47801	SNAI1	snail homolog 1 (Drosophila)	DNA binding /// protein binding /// intracellular /// nucleus /// multicellular organismal development /// zinc ion binding /// hair follicle morphogenesis /// metal ion binding
7961371	0.576282	1.491	8.42959	5.72397	1.47019e-05	0.00132664	3.06796	DUSP16	dual specificity phosphatase 16	inactivation of MAPK activity /// phosphoprotein phosphatase activity /// protein tyrosine phosphatase activity /// protein binding /// nucleus /// cytoplasm /// protein amino acid dephosphorylation /// cytoplasmic membrane-bounded vesicle /// dephosphorylation /// hydrolase activity /// MAP kinase tyrosine/serine/threonine phosphatase activity /// MAPK export from nucleus /// MAPK phosphatase ex…
7976766	0.575862	1.49057	8.3878	5.44176	2.74126e-05	0.00223168	2.44867	WDR25	WD repeat domain 25	---
8076241	0.574262	1.48892	8.76016	5.93296	9.32313e-06	0.000892928	3.52098	MKL1	megakaryoblastic leukemia (translocation) 1	nucleic acid binding /// transcription coactivator activity /// actin monomer binding /// protein binding /// nucleus /// regulation of transcription /// cytoplasm /// anti-apoptosis /// positive regulation of transcription
8120719	0.567701	1.48216	10.6195	4.80118	0.000116149	0.00725593	1.01659	CD109	CD109 molecule	serine-type endopeptidase inhibitor activity /// protein binding /// extracellular region /// extracellular space /// plasma membrane /// anchored to membrane
8170326	0.567215	1.48166	10.0398	4.76188	0.00012705	0.00782329	0.92782	FMR1	fragile X mental retardation 1	RNA binding /// mRNA binding /// protein binding /// soluble fraction /// nucleus /// nucleoplasm /// nucleolus /// cytoplasm /// transport /// polysomal ribosome /// mRNA transport
7965941	0.566874	1.48131	5.93501	5.02055	7.05482e-05	0.00487353	1.51044	GLT8D2	glycosyltransferase 8 domain containing 2	membrane /// integral to membrane /// transferase activity, transferring glycosyl groups
7988426	0.56449	1.47886	8.4928	5.44723	2.70813e-05	0.00221012	2.46075	SLC30A4	solute carrier family 30 (zinc transporter), member 4	zinc ion transmembrane transporter activity /// late endosome /// cation transport /// zinc ion transport /// lactation /// cation transmembrane transporter activity /// response to toxin /// endosome membrane /// response to zinc ion /// membrane /// integral to membrane /// cytoplasmic membrane-bounded vesicle /// sequestering of zinc ion /// response to vitamin A /// cytoplasmic part /// zinc …
8154916	0.564158	1.47852	8.44085	5.29675	3.78821e-05	0.00288641	2.12738	GALT	galactose-1-phosphate uridylyltransferase	soluble fraction /// cytosol /// carbohydrate metabolic process /// galactose metabolic process /// UDP-glucose:hexose-1-phosphate uridylyltransferase activity /// zinc ion binding /// transferase activity /// nucleotidyltransferase activity /// UDP-glucose conversion /// metal ion binding /// iron ion binding /// galactose metabolic process /// UDP-glucose:hexose-1-phosphate uridylyltransferase …
8141768	0.560536	1.47482	8.22625	5.89249	1.01788e-05	0.000960124	3.43363	POLR2J4 /// LOC100132214 /// RASA4 /// RASA4P /// RASA4B	polymerase (RNA) II (DNA directed) polypeptide J4, pseudogene /// similar to calcium-promoted Ras inactivator /// RAS p21 protein activator 4 /// RAS p21 protein activator 4 pseudogene /// RAS p21 protein activator 4B	GTPase activator activity /// intracellular /// cytoplasm /// cytosol /// plasma membrane /// metal ion binding /// regulation of small GTPase mediated signal transduction /// intracellular signaling cascade /// zinc ion binding
8011884	0.558332	1.47257	8.63659	5.0555	6.51849e-05	0.00456939	1.58883	NLRP1 /// LOC728392	NLR family, pyrin domain containing 1 /// hypothetical protein LOC728392	nucleotide binding /// protein binding /// ATP binding /// intracellular /// nucleus /// cytoplasm /// induction of apoptosis /// induction of apoptosis /// activation of caspase activity /// activation of caspase activity /// defense response /// caspase activator activity /// enzyme binding /// protein domain specific binding /// regulation of apoptosis /// neuron apoptosis
8101002	0.556812	1.47101	6.31955	4.64568	0.000165744	0.00956459	0.664948	BTC	betacellulin	positive regulation of diuresis /// epidermal growth factor receptor binding /// extracellular region /// extracellular space /// soluble fraction /// plasma membrane /// growth factor activity /// positive regulation of cell proliferation /// integral to membrane /// negative regulation of apoptosis /// positive regulation of cell differentiation /// positive regulation of mitosis /// positive r…
7960544	0.554021	1.46817	8.76883	4.75447	0.000129218	0.00793834	0.911083	VAMP1 /// TAPBPL	vesicle-associated membrane protein 1 (synaptobrevin 1) /// TAP binding protein-like	protein binding /// mitochondrion /// mitochondrial outer membrane /// integral to plasma membrane /// membrane /// vesicle-mediated transport /// synaptosome /// cell junction /// cytoplasmic vesicle membrane /// synaptic vesicle membrane /// cytoplasmic vesicle /// synapse /// endoplasmic reticulum /// endoplasmic reticulum membrane /// microsome /// plasma membrane /// integral to membrane ///…
7973564	0.553287	1.46743	10.978	6.31501	4.11138e-06	0.000438771	4.33552	PSME1	proteasome (prosome, macropain) activator subunit 1 (PA28 alpha)	proteasome complex /// cytoplasm /// proteasome activator complex /// proteasome activator activity /// anaphase-promoting complex-dependent proteasomal ubiquitin-dependent protein catabolic process /// negative regulation of ubiquitin-protein ligase activity involved in mitotic cell cycle /// positive regulation of ubiquitin-protein ligase activity involved in mitotic cell cycle /// proteasome c…
7990839	0.551578	1.46569	7.34887	5.64016	1.76733e-05	0.00154049	2.88493	IL16 /// STARD5	interleukin 16 (lymphocyte chemoattractant factor) /// StAR-related lipid transfer (START) domain containing 5	cytokine activity /// protein binding /// extracellular region /// extracellular space /// intracellular /// nucleus /// cytoplasm /// chemotaxis /// immune response /// leukocyte chemotaxis /// interspecies interaction between organisms /// regulation of transcription /// induction of positive chemotaxis /// cytosol /// steroid biosynthetic process /// lipid transport /// lipid binding /// extra…
8038117	0.539968	1.45394	8.78823	5.17007	5.03398e-05	0.00364383	1.84517	DBP	D site of albumin promoter (albumin D-box) binding protein	transcription factor activity /// RNA polymerase II transcription factor activity /// nucleus /// regulation of transcription from RNA polymerase II promoter /// regulation of cell proliferation /// sequence-specific DNA binding /// protein dimerization activity /// rhythmic process
7915861	0.530054	1.44398	8.03588	5.19699	4.73825e-05	0.00345986	1.90525	MOBKL2C /// MKNK1	MOB1, Mps One Binder kinase activator-like 2C (yeast) /// MAP kinase interacting serine/threonine kinase 1	nucleotide binding /// protein serine/threonine kinase activity /// protein binding /// ATP binding /// nucleus /// cytoplasm /// regulation of translation /// protein amino acid phosphorylation /// response to stress /// intracellular protein kinase cascade /// transferase activity /// protein binding /// metal ion binding /// zinc ion binding
8021542	0.528109	1.44204	8.77763	5.64925	1.73234e-05	0.00152597	2.90482	ZCCHC2	zinc finger, CCHC domain containing 2	nucleic acid binding /// protein binding /// cytoplasm /// cell communication /// zinc ion binding /// phosphoinositide binding /// metal ion binding
8117685	0.527121	1.44105	7.24529	5.54599	2.17556e-05	0.00184325	2.67835	ZKSCAN3	zinc finger with KRAB and SCAN domains 3	transcription factor activity /// protein binding /// intracellular /// nucleus /// regulation of transcription, DNA-dependent /// zinc ion binding /// metal ion binding
8023843	0.521903	1.43585	6.23376	4.99569	7.46345e-05	0.00508657	1.45463	FBXO15	F-box protein 15	protein binding /// SCF ubiquitin ligase complex /// modification-dependent protein catabolic process
8017346	0.51802	1.43199	7.88352	5.92297	9.52726e-06	0.000908967	3.49943	LOC100134348 /// TBC1D3P2 /// TBC1D3F /// TBC1D3C /// TBC1D3G /// TBC1D3B /// TBC1D3 /// TBC1D3H	similar to TBC1 domain family member 3 (Rab GTPase-activating protein PRC17) (Prostate cancer gene 17 protein) (TRE17 alpha protein) /// TBC1 domain family, member 3 pseudogene 2 /// TBC1 domain family, member 3F /// TBC1 domain family, member 3C /// TBC1 domain family, member 3G /// TBC1 domain family, member 3B /// TBC1 domain family, member 3 /// TBC1 domain family, member 3H	GTPase activator activity /// Rab GTPase activator activity /// intracellular /// regulation of Rab GTPase activity
8095341	0.517807	1.43178	8.80524	5.45038	2.68921e-05	0.00220548	2.46772	---	---	---
7990027	0.507785	1.42187	7.46414	4.867	9.99732e-05	0.00649727	1.16505	C15orf28	chromosome 15 open reading frame 28	---
8077123	0.504962	1.41909	8.59464	5.14259	5.35525e-05	0.00385127	1.78379	CPT1B /// CHKB /// CHKB-CPT1B	carnitine palmitoyltransferase 1B (muscle) /// choline kinase beta /// choline kinase-like, carnitine palmitoyltransferase 1B (muscle) transcription unit	nucleotide binding /// choline kinase activity /// ethanolamine kinase activity /// ATP binding /// phosphatidylethanolamine biosynthetic process /// phosphatidylcholine biosynthetic process /// muscle organ development /// phospholipid biosynthetic process /// transferase activity /// carnitine O-palmitoyltransferase activity /// protein binding /// mitochondrion /// mitochondrial outer membrane…
8117343	0.500113	1.41432	6.90927	4.8478	0.000104439	0.00671335	1.12177	HFE	hemochromatosis	antigen processing and presentation of peptide antigen via MHC class I /// protein binding /// cytoplasm /// early endosome /// plasma membrane /// integral to plasma membrane /// protein complex assembly /// ion transport /// iron ion transport /// cellular iron ion homeostasis /// receptor-mediated endocytosis /// immune response /// female pregnancy /// cellular response to iron ion starvation…
8012349	0.496993	1.41127	7.89372	4.6269	0.000173032	0.00986549	0.622425	PER1	period homolog 1 (Drosophila)	signal transducer activity /// protein binding /// nucleus /// cytoplasm /// regulation of transcription, DNA-dependent /// signal transduction /// circadian rhythm /// entrainment of circadian clock /// negative regulation of transcription /// circadian rhythm
8108080	0.494549	1.40888	9.5132	4.63664	0.000169211	0.00966416	0.644492	PHF15	PHD finger protein 15	histone acetyltransferase complex /// protein binding /// zinc ion binding /// histone H3 acetylation /// histone H4-K5 acetylation /// histone H4-K8 acetylation /// histone H4-K12 acetylation /// histone H4-K16 acetylation /// metal ion binding
8101158	0.493413	1.40777	10.7224	6.23788	4.8432e-06	0.000510121	4.17254	SCARB2	scavenger receptor class B, member 2	receptor activity /// protein binding /// membrane fraction /// lysosomal membrane /// integral to plasma membrane /// cell adhesion /// membrane /// lysosome
8124088	0.493087	1.40745	9.49373	4.89204	9.44352e-05	0.00622655	1.22148	KIF13A	kinesin family member 13A	nucleotide binding /// microtubule motor activity /// protein binding /// ATP binding /// microtubule /// microtubule-based movement /// protein transport
8156549	0.484693	1.39929	7.53654	4.99203	7.5257e-05	0.00511394	1.44639	C9orf3	chromosome 9 open reading frame 3	aminopeptidase activity /// binding /// cytoplasm /// proteolysis /// peptidase activity /// metallopeptidase activity /// zinc ion binding /// leukotriene biosynthetic process /// metal ion binding
8069511	0.478336	1.39314	7.32462	4.70662	0.000144157	0.00866424	0.802885	C21orf81	ankyrin repeat domain 20 family, member A3 pseudogene	---
7904830	0.47489	1.38981	10.8406	4.84518	0.000105066	0.00672766	1.11585	RNF115	ring finger protein 115	protein binding /// zinc ion binding /// metal ion binding
8072039	0.449983	1.36602	7.7439	4.62161	0.000175145	0.00995037	0.610436	MYO18B	myosin XVIIIB	nucleotide binding /// motor activity /// actin binding /// protein binding /// ATP binding /// nucleus /// cytoplasm /// unconventional myosin complex /// sarcomere /// nucleus /// cytoplasm
8008113	0.447543	1.36372	9.97621	5.65326	1.71714e-05	0.0015166	2.91357	CALCOCO2	calcium binding and coiled-coil domain 2	protein binding /// soluble fraction /// nucleus /// cytoplasm /// Golgi apparatus /// cytoskeleton /// viral reproduction /// response to interferon-gamma /// protein homodimerization activity /// perinuclear region of cytoplasm /// perinuclear region of cytoplasm
8105463	0.445631	1.36191	10.4564	4.78882	0.000119472	0.00744956	0.98867	GPBP1	GC-rich promoter binding protein 1	DNA binding /// nucleus /// cytoplasm /// regulation of transcription
8167369	0.442551	1.35901	7.65662	5.05176	6.57378e-05	0.00459847	1.58046	HDAC6	histone deacetylase 6	histone deacetylase complex /// protein polyubiquitination /// actin binding /// histone deacetylase activity /// protein binding /// nucleus /// cytoplasm /// microtubule /// microtubule associated complex /// caveola /// protein amino acid deacetylation /// misfolded or incompletely synthesized protein catabolic process /// intracellular protein transport /// negative regulation of microtubule …
8148333	0.41328	1.33171	10.9491	4.7488	0.000130906	0.00799775	0.898246	EFR3A	EFR3 homolog A (S. cerevisiae)	binding /// plasma membrane
8024660	0.410547	1.32919	9.90528	5.02282	7.01862e-05	0.0048586	1.51554	HMG20B	high-mobility group 20B	DNA binding /// transcription factor activity /// protein binding /// nucleus /// chromatin organization /// regulation of transcription, DNA-dependent /// cell cycle /// chromatin modification
8013771	0.410242	1.32891	9.43168	4.64244	0.000166978	0.00960255	0.657614	TLCD1	TLC domain containing 1	membrane /// integral to membrane
8009014	0.39488	1.31483	9.90179	5.39321	3.05405e-05	0.00243279	2.34133	TLK2	tousled-like kinase 2	nucleotide binding /// regulation of chromatin assembly or disassembly /// protein serine/threonine kinase activity /// protein serine/threonine kinase activity /// protein binding /// ATP binding /// nucleus /// nucleus /// protein amino acid phosphorylation /// response to DNA damage stimulus /// cell cycle /// chromatin modification /// transferase activity /// intracellular signaling cascade
7978558	0.391279	1.31156	9.85393	4.66907	0.000157096	0.00922543	0.717909	EAPP	E2F-associated phosphoprotein	nucleus /// cytoplasm /// Golgi apparatus /// nucleus /// cytoplasm
7985482	0.366799	1.28949	8.93283	5.02709	6.95116e-05	0.00482193	1.52511	WHAMM	WAS protein homolog associated with actin, golgi membranes and microtubules	actin binding /// cytoplasm /// ER-Golgi intermediate compartment /// Golgi apparatus /// membrane /// cytoplasmic vesicle membrane /// cytoplasmic vesicle
8088054	0.337031	1.26315	9.9687	4.63862	0.000168445	0.00963865	0.648972	TMEM110	transmembrane protein 110	molecular_function /// cellular_component /// biological_process /// membrane /// integral to membrane
8052698	-0.346336	0.786579	9.43416	-4.85021	0.000103868	0.00670248	1.12721	C1D	C1D nuclear receptor co-repressor	exosome (RNase complex) /// DNA binding /// transcription corepressor activity /// RNA binding /// protein binding /// nucleus /// nucleolus /// cytoplasm /// rRNA processing /// apoptosis /// negative regulation of transcription /// ligand-dependent nuclear receptor binding /// transcriptional repressor complex /// DNA binding /// nucleus
7920291	-0.356397	0.781113	12.2207	-5.46985	2.57542e-05	0.00212262	2.51068	S100A16	S100 calcium binding protein A16	calcium ion binding /// nucleus /// nucleolus /// cytoplasm /// protein homodimerization activity /// response to calcium ion
8077851	-0.370587	0.773468	8.3592	-4.6804	0.000153071	0.00903919	0.743564	HRH1	histamine receptor H1	receptor activity /// G-protein coupled receptor activity /// histamine receptor activity /// plasma membrane /// integral to plasma membrane /// inflammatory response /// signal transduction /// G-protein coupled receptor protein signaling pathway /// activation of phospholipase C activity by G-protein coupled receptor protein signaling pathway coupled to IP3 second messenger /// synaptic transm…
8141950	-0.380059	0.768406	6.50081	-4.752	0.00012995	0.00796857	0.9055	RELN	reelin	cell morphogenesis involved in differentiation /// neuron migration /// protein serine/threonine/tyrosine kinase activity /// protein binding /// extracellular region /// proteinaceous extracellular matrix /// extracellular space /// cytoplasm /// cell adhesion /// multicellular organismal development /// axon guidance /// central nervous system development /// brain development /// locomotory be…
7932964	-0.382211	0.767261	9.75708	-4.6955	0.000147871	0.00885553	0.777729	C1D	C1D nuclear receptor co-repressor	exosome (RNase complex) /// DNA binding /// transcription corepressor activity /// RNA binding /// protein binding /// nucleus /// nucleolus /// cytoplasm /// rRNA processing /// apoptosis /// negative regulation of transcription /// ligand-dependent nuclear receptor binding /// transcriptional repressor complex /// DNA binding /// nucleus
8166611	-0.397599	0.75912	11.5845	-5.01205	7.19194e-05	0.00492737	1.49136	MAGEB2	melanoma antigen family B, 2	protein binding
7948667	-0.412782	0.751173	11.0667	-4.6676	0.000157625	0.00923926	0.714583	AHNAK	AHNAK nucleoprotein	protein binding /// nucleus /// nervous system development
7980005	-0.41461	0.750222	10.2912	-4.84371	0.000105417	0.00673717	1.11255	NUMB	numb homolog (Drosophila)	protein binding /// protein binding /// nucleus /// cytoplasm /// early endosome /// integral to plasma membrane /// multicellular organismal development /// nervous system development /// neuroblast proliferation /// axonogenesis /// beta-catenin binding /// membrane /// basolateral plasma membrane /// extrinsic to plasma membrane /// lateral ventricle development /// neuroblast division in the …
8066279	-0.417343	0.748803	8.35398	-4.69384	0.000148434	0.00885736	0.773976	ZHX3	zinc fingers and homeoboxes 3	transcription factor activity /// protein binding /// intracellular /// nucleus /// cytoplasm /// zinc ion binding /// sequence-specific DNA binding /// negative regulation of transcription, DNA-dependent /// metal ion binding
7936706	-0.417655	0.748641	10.9686	-4.70947	0.000143219	0.00862346	0.809337	C10orf119	chromosome 10 open reading frame 119	molecular_function /// cellular_component /// biological_process
8099142	-0.419363	0.747755	5.39554	-4.64151	0.000167332	0.00960628	0.655526	---	---	---
8098508	-0.428499	0.743034	8.25855	-4.98418	7.66075e-05	0.00519511	1.42876	ING2	inhibitor of growth family, member 2	DNA binding /// chromatin binding /// protein binding /// nucleus /// regulation of transcription, DNA-dependent /// signal transduction /// zinc ion binding /// transcription activator activity /// chromatin modification /// Sin3 complex /// CCAAT-binding factor complex /// positive regulation of transforming growth factor beta receptor signaling pathway /// protein complex binding /// regulatio…
7900235	-0.438665	0.737817	10.3745	-4.63854	0.000168474	0.00963865	0.6488	MACF1	microtubule-actin crosslinking factor 1	mesoderm formation /// actin binding /// actin binding /// calcium ion binding /// calcium ion binding /// protein binding /// cytoplasm /// cytoplasm /// cytoskeleton /// posttranslational protein targeting to membrane /// cellular component movement /// cell cycle arrest /// establishment or maintenance of cell polarity /// microtubule binding /// microtubule binding /// biological_process /// …
8043363	-0.458409	0.727788	12.1504	-4.61763	0.00017675	0.0099919	0.601424	NCRNA00152 /// LOC541471	non-protein coding RNA 152 /// hypothetical LOC541471	---
7948332	-0.461116	0.726424	9.37602	-4.80323	0.000115609	0.00723577	1.0212	LPXN	leupaxin	cytoplasm /// protein complex assembly /// cell adhesion /// signal transduction /// zinc ion binding /// metal ion binding
8154316	-0.463092	0.72543	10.2614	-5.24828	4.22273e-05	0.00314551	2.01958	UHRF2	ubiquitin-like with PHD and ring finger domains 2	DNA binding /// ubiquitin-protein ligase activity /// protein binding /// nucleus /// ubiquitin-dependent protein catabolic process /// zinc ion binding /// cell proliferation /// protein ubiquitination /// ligase activity /// cell differentiation /// metal ion binding /// regulation of cell cycle /// protein autoubiquitination
8083214	-0.480152	0.716902	8.6039	-4.66651	0.00015802	0.00923926	0.712113	CHST2	carbohydrate (N-acetylglucosamine-6-O) sulfotransferase 2	N-acetylglucosamine 6-O-sulfotransferase activity /// Golgi apparatus /// trans-Golgi network /// carbohydrate metabolic process /// N-acetylglucosamine metabolic process /// sulfur metabolic process /// inflammatory response /// multicellular organismal development /// sulfotransferase activity /// membrane /// integral to membrane /// transferase activity /// intrinsic to Golgi membrane /// inf…
8047243	-0.480416	0.716771	8.23995	-4.92783	8.70567e-05	0.00578589	1.30207	MARS2	methionyl-tRNA synthetase 2, mitochondrial	nucleotide binding /// methionine-tRNA ligase activity /// methionine-tRNA ligase activity /// ATP binding /// cytoplasm /// mitochondrion /// mitochondrial matrix /// mitochondrial matrix /// methionyl-tRNA aminoacylation /// ligase activity
8023598	-0.481395	0.716285	7.18354	-4.6529	0.000163021	0.00947313	0.681318	RNF152	ring finger protein 152	protein binding /// zinc ion binding /// metal ion binding
7934729	-0.484318	0.714835	9.29317	-5.30582	3.71208e-05	0.00284795	2.14754	C1D	C1D nuclear receptor co-repressor	exosome (RNase complex) /// DNA binding /// transcription corepressor activity /// RNA binding /// protein binding /// nucleus /// nucleolus /// cytoplasm /// rRNA processing /// apoptosis /// negative regulation of transcription /// ligand-dependent nuclear receptor binding /// transcriptional repressor complex /// DNA binding /// nucleus
8122807	-0.48672	0.713646	9.59477	-4.73187	0.00013607	0.00828285	0.859978	AKAP12	A kinase (PRKA) anchor protein 12	nucleus /// cytoplasm /// cytoskeleton /// plasma membrane /// cell cortex /// protein targeting /// signal transduction /// G-protein coupled receptor protein signaling pathway /// adenylate cyclase binding /// positive regulation of protein kinase A signaling cascade /// positive regulation of cAMP biosynthetic process /// protein kinase A binding /// cytoplasm
8038598	-0.495204	0.709461	7.8431	-4.85623	0.000102453	0.00663694	1.14078	SHANK1	SH3 and multiple ankyrin repeat domains 1	protein binding /// intracellular /// membrane fraction /// cytoplasm /// plasma membrane /// cytoskeletal anchoring at plasma membrane /// postsynaptic density /// cell junction /// dendrite /// synapse /// postsynaptic membrane
7925954	-0.497099	0.70853	9.87275	-5.99512	8.15022e-06	0.000800524	3.65473	NET1	neuroepithelial cell transforming 1	regulation of cell growth /// guanyl-nucleotide exchange factor activity /// Rho guanyl-nucleotide exchange factor activity /// cellular_component /// intracellular /// nucleus /// cytoplasm /// cytosol /// apoptosis /// signal transduction /// induction of apoptosis by extracellular signals /// regulation of Rho protein signal transduction /// guanyl-nucleotide exchange factor activity /// intra…
8084891	-0.500513	0.706855	8.61217	-7.20571	6.56391e-07	9.71371e-05	6.15967	FAM43A	family with sequence similarity 43, member A	---
7934731	-0.502521	0.705872	9.34897	-5.58069	2.01494e-05	0.00172472	2.75459	C1D	C1D nuclear receptor co-repressor	exosome (RNase complex) /// DNA binding /// transcription corepressor activity /// RNA binding /// protein binding /// nucleus /// nucleolus /// cytoplasm /// rRNA processing /// apoptosis /// negative regulation of transcription /// ligand-dependent nuclear receptor binding /// transcriptional repressor complex /// DNA binding /// nucleus
7975136	-0.517291	0.698682	11.0175	-4.83468	0.000107609	0.00685097	1.09218	FUT8	fucosyltransferase 8 (alpha (1,6) fucosyltransferase)	in utero embryonic development /// Golgi apparatus /// protein amino acid N-linked glycosylation /// N-glycan processing /// transforming growth factor beta receptor signaling pathway /// integrin-mediated signaling pathway /// respiratory gaseous exchange /// glycoprotein 6-alpha-L-fucosyltransferase activity /// oligosaccharide biosynthetic process /// membrane /// integral to membrane /// cell…
7990657	-0.519353	0.697685	8.2291	-5.47553	2.54313e-05	0.00210643	2.52321	TBC1D2B	TBC1 domain family, member 2B	GTPase activator activity /// Rab GTPase activator activity /// intracellular /// regulation of Rab GTPase activity
8138553	-0.529243	0.692918	9.42589	-4.81551	0.000112415	0.00707441	1.04893	FAM126A	family with sequence similarity 126, member A	signal transducer activity /// cellular_component /// cytoplasm /// biological_process /// membrane
7972674	-0.533181	0.691029	9.36187	-4.672	0.000156046	0.00917998	0.724535	C13orf27	chromosome 13 open reading frame 27	hydrolase activity
8056201	-0.550071	0.682986	10.8256	-5.06081	6.44073e-05	0.00453398	1.60073	RBMS1	RNA binding motif, single stranded interacting protein 1	DNA binding /// double-stranded DNA binding /// single-stranded DNA binding /// RNA binding /// nucleus /// DNA replication /// RNA processing /// double-stranded DNA binding /// single-stranded DNA binding /// cellular_component /// nucleus /// DNA replication
8074806	-0.55057	0.68275	9.04403	-4.76586	0.0001259	0.00777756	0.936816	PPM1F /// PPM1F	protein phosphatase 1F (PP2C domain containing) /// protein phosphatase, Mg2+/Mn2+ dependent, 1F	protein serine/threonine phosphatase activity /// protein amino acid dephosphorylation /// apoptosis /// protein serine/threonine phosphatase complex /// hydrolase activity /// metal ion binding /// magnesium ion binding /// manganese ion binding
8023646	-0.551241	0.682433	7.95379	-5.24309	4.27218e-05	0.00317524	2.00802	BCL2	B-cell CLL/lymphoma 2	G1/S transition of mitotic cell cycle /// protein phosphatase type 2A complex /// protein polyubiquitination /// cell morphogenesis /// ovarian follicle development /// ureteric bud development /// branching involved in ureteric bud morphogenesis /// behavioral fear response /// response to hypoxia /// B cell homeostasis /// release of cytochrome c from mitochondria /// release of cytochrome c fr…
8119466	-0.554049	0.681106	7.93916	-6.19108	5.35125e-06	0.00054994	4.07329	MDFI	MyoD family inhibitor	negative regulation of transcription from RNA polymerase II promoter /// protein binding /// nucleus /// cytoplasm /// activation of JUN kinase activity /// embryonic development /// dorsal/ventral axis specification /// regulation of Wnt receptor signaling pathway /// cell differentiation /// negative regulation of Wnt receptor signaling pathway /// cytoplasmic sequestering of transcription fact…
8143961	-0.559399	0.678585	9.63092	-4.80498	0.000115149	0.00722053	1.02515	PRKAG2	protein kinase, AMP-activated, gamma 2 non-catalytic subunit	AMP-activated protein kinase activity /// cAMP-dependent protein kinase inhibitor activity /// ATP binding /// nucleoplasm /// cytosol /// glycogen metabolic process /// regulation of glycolysis /// negative regulation of protein kinase activity /// fatty acid biosynthetic process /// ATP biosynthetic process /// intracellular protein kinase cascade /// cAMP-dependent protein kinase regulator act…
7975760	-0.564735	0.676079	10.9655	-6.03223	7.5234e-06	0.00075002	3.73434	EIF2B2	eukaryotic translation initiation factor 2B, subunit 2 beta, 39kDa	ovarian follicle development /// translation initiation factor activity /// guanyl-nucleotide exchange factor activity /// guanyl-nucleotide exchange factor activity /// protein binding /// ATP binding /// GTP binding /// cytoplasm /// eukaryotic translation initiation factor 2B complex /// translational initiation /// regulation of translational initiation /// central nervous system development …
8088560	-0.566688	0.675165	6.98651	-4.69399	0.000148383	0.00885736	0.774318	ADAMTS9	ADAM metallopeptidase with thrombospondin type 1 motif, 9	metalloendopeptidase activity /// extracellular region /// proteinaceous extracellular matrix /// proteolysis /// glycoprotein catabolic process /// multicellular organismal development /// peptidase activity /// metallopeptidase activity /// zinc ion binding /// metal ion binding
8118945	-0.566903	0.675064	9.57512	-4.87003	9.92856e-05	0.00647979	1.17188	PPARD	peroxisome proliferator-activated receptor delta	negative regulation of transcription from RNA polymerase II promoter /// placenta development /// DNA binding /// transcription factor activity /// transcription factor activity /// steroid hormone receptor activity /// ligand-dependent nuclear receptor activity /// fatty acid binding /// protein binding /// nucleus /// glucose metabolic process /// generation of precursor metabolites and energy …
7896692	-0.568615	0.674264	8.73513	-5.32975	3.51867e-05	0.00273103	2.20068	---	---	---
7907601	-0.578775	0.669532	6.30359	-5.47372	2.55338e-05	0.00210967	2.51922	FAM5B	family with sequence similarity 5, member B	extracellular region /// cytoplasm /// nervous system development /// negative regulation of cell cycle
8142981	-0.581306	0.668359	11.7962	-6.89714	1.2246e-06	0.000164417	5.54007	PODXL	podocalyxin-like	protein binding /// plasma membrane /// integral to plasma membrane /// negative regulation of cell adhesion /// leukocyte migration /// membrane
7898263	-0.581539	0.668251	8.05132	-5.01227	7.18836e-05	0.00492737	1.49185	FBLIM1	filamin binding LIM protein 1	protein binding /// cytoplasm /// cytosol /// cytoskeleton /// focal adhesion /// cell cortex /// cell adhesion /// zinc ion binding /// regulation of cell shape /// cell junction /// metal ion binding
8153201	-0.582279	0.667908	9.57787	-5.4478	2.70471e-05	0.00221012	2.46201	EIF2C2	eukaryotic translation initiation factor 2C, 2	RNA 7-methylguanosine cap binding /// cytoplasmic mRNA processing body /// translation initiation factor activity /// endonuclease activity /// protein binding /// nucleus /// cytoplasm /// mRNA cap binding complex /// translation /// regulation of translation /// RNA-induced silencing complex /// hydrolase activity /// gene silencing by RNA /// pre-microRNA processing /// micro-ribonucleoprotein…
7970924	-0.583601	0.667296	8.08048	-6.75597	1.63592e-06	0.0002044	5.25216	STARD13	StAR-related lipid transfer (START) domain containing 13	GTPase activator activity /// protein binding /// intracellular /// cytoplasm /// mitochondrion /// lipid particle /// signal transduction /// membrane /// mitochondrial membrane
8129618	-0.58408	0.667075	6.00414	-5.32086	3.58932e-05	0.00277293	2.18094	VNN1	vanin 1	acute inflammatory response /// chronic inflammatory response /// plasma membrane /// nitrogen compound metabolic process /// anti-apoptosis /// cellular component movement /// inflammatory response /// response to oxidative stress /// pantothenate metabolic process /// integral to membrane /// cell-cell adhesion /// pantetheine hydrolase activity /// anchored to membrane /// positive regulation …
8111153	-0.588065	0.665234	11.0926	-5.29507	3.80244e-05	0.00289064	2.12366	MYO10	myosin X	nucleotide binding /// motor activity /// actin binding /// ATP binding /// cytoskeleton /// signal transduction /// myosin complex
8084206	-0.590683	0.664028	10.4773	-4.7497	0.000130637	0.00799599	0.900282	B3GNT5	UDP-GlcNAc:betaGal beta-1,3-N-acetylglucosaminyltransferase 5	Golgi membrane /// intracellular /// Golgi apparatus /// protein amino acid glycosylation /// multicellular organismal development /// central nervous system development /// galactosyltransferase activity /// beta-galactosyl-N-acetylglucosaminylgalactosylglucosyl-ceramide beta-1,3-acetylglucosaminyltransferase activity /// lipopolysaccharide N-acetylglucosaminyltransferase activity /// glycolipid…
8081590	-0.598225	0.660566	10.3023	-5.73819	1.42508e-05	0.00128943	3.09895	PHLDB2	pleckstrin homology-like domain, family B, member 2	cytoplasm /// membrane
8170420	-0.601099	0.659251	8.45984	-4.84007	0.000106296	0.00678036	1.10433	MAMLD1	mastermind-like domain containing 1	molecular_function /// cellular_component /// nucleus /// biological_process /// regulation of transcription
7926158	-0.601925	0.658874	8.53586	-4.72722	0.000137523	0.00834482	0.849471	C10orf47	chromosome 10 open reading frame 47	---
8113130	-0.603973	0.65794	9.00622	-6.00738	7.9374e-06	0.000784248	3.68105	MCTP1	multiple C2 domains, transmembrane 1	calcium ion binding /// calcium-dependent phospholipid binding /// membrane fraction /// membrane /// integral to membrane /// calcium-mediated signaling
7912994	-0.609548	0.655402	8.5721	-5.53914	2.20877e-05	0.00186191	2.6633	IFFO2	intermediate filament family orphan 2	---
8064978	-0.609837	0.655271	8.92063	-6.06662	6.9866e-06	0.000698598	3.80798	JAG1	jagged 1 (Alagille syndrome)	angiogenesis /// cell fate determination /// morphogenesis of an epithelial sheet /// Notch binding /// structural molecule activity /// calcium ion binding /// protein binding /// extracellular region /// plasma membrane /// integral to plasma membrane /// cell communication /// Notch signaling pathway /// multicellular organismal development /// nervous system development /// growth factor acti…
8085665	-0.612183	0.654206	9.2498	-5.11369	5.71578e-05	0.00408408	1.71916	RFTN1	raftlin, lipid raft linker 1	plasma membrane
8057887	-0.612446	0.654087	10.9785	-4.81632	0.000112209	0.00707441	1.05074	STK17B	serine/threonine kinase 17b	nucleotide binding /// protein serine/threonine kinase activity /// protein binding /// ATP binding /// nucleus /// protein amino acid phosphorylation /// apoptosis /// induction of apoptosis /// intracellular protein kinase cascade /// actin cytoskeleton /// transferase activity /// protein kinase cascade
8155554	-0.613397	0.653656	7.25838	-4.77086	0.000124471	0.00771789	0.948114	AQP7 /// AQP7P2 /// AQP7P1	aquaporin 7 /// aquaporin 7 pseudogene 2 /// aquaporin 7 pseudogene 1	transporter activity /// cytoplasm /// plasma membrane /// integral to plasma membrane /// cell-cell junction /// generation of precursor metabolites and energy /// water transport /// spermatogenesis /// excretion /// water channel activity /// glycerol channel activity /// urea channel activity /// glycerol transport /// urea transport /// ribonucleoprotein complex /// brush border membrane ///…
8111101	-0.614057	0.653357	10.0275	-5.70678	1.52667e-05	0.00137018	3.03047	ANKH	ankylosis, progressive homolog (mouse)	skeletal system development /// inorganic phosphate transmembrane transporter activity /// integral to plasma membrane /// transport /// phosphate transport /// locomotory behavior /// integral to membrane /// outer membrane /// outer membrane /// regulation of bone mineralization /// regulation of bone mineralization /// inorganic diphosphate transmembrane transporter activity
8107100	-0.618568	0.651317	9.05015	-6.57747	2.36825e-06	0.000270309	4.88425	RGMB	RGM domain family, member B	ER-Golgi intermediate compartment /// plasma membrane /// cell adhesion /// signal transduction /// BMP signaling pathway /// identical protein binding /// membrane raft /// positive regulation of transcription /// anchored to plasma membrane
7952453	-0.620575	0.650412	8.1872	-5.19755	4.73224e-05	0.00345986	1.90651	ROBO4	roundabout homolog 4, magic roundabout (Drosophila)	angiogenesis /// receptor activity /// multicellular organismal development /// integral to membrane /// cell differentiation /// regulation of cell migration
7900336	-0.621346	0.650064	8.21258	-4.71558	0.000141232	0.0085192	0.823155	MACF1	microtubule-actin crosslinking factor 1	mesoderm formation /// actin binding /// actin binding /// calcium ion binding /// calcium ion binding /// protein binding /// cytoplasm /// cytoplasm /// cytoskeleton /// posttranslational protein targeting to membrane /// cellular component movement /// cell cycle arrest /// establishment or maintenance of cell polarity /// microtubule binding /// microtubule binding /// biological_process /// …
8072374	-0.622672	0.649467	7.98742	-6.75592	1.63607e-06	0.0002044	5.25207	SLC35E4 /// DUSP18	solute carrier family 35, member E4 /// dual specificity phosphatase 18	protein tyrosine phosphatase activity /// nucleus /// cytoplasm /// protein amino acid dephosphorylation /// hydrolase activity /// MAP kinase tyrosine/serine/threonine phosphatase activity /// membrane /// integral to membrane
8060949	-0.625769	0.648074	7.60428	-4.87456	9.82661e-05	0.00645358	1.1821	ANKRD5	ankyrin repeat domain 5	calcium ion binding
8021418	-0.635978	0.643504	9.00204	-5.99645	8.12697e-06	0.000800524	3.65757	MALT1	mucosa associated lymphoid tissue lymphoma translocation gene 1	B-1 B cell differentiation /// response to molecule of bacterial origin /// positive regulation of T cell cytokine production /// cysteine-type endopeptidase activity /// ubiquitin-protein ligase activity /// signal transducer activity /// protein binding /// nucleus /// cytoplasm /// cytosol /// proteolysis /// anti-apoptosis /// defense response /// activation of NF-kappaB-inducing kinase activ…
8096116	-0.638856	0.642222	10.8744	-5.77942	1.30218e-05	0.00119446	3.18864	AGPAT9	1-acylglycerol-3-phosphate O-acyltransferase 9	glycerol-3-phosphate O-acyltransferase activity /// endoplasmic reticulum /// endoplasmic reticulum membrane /// metabolic process /// acyltransferase activity /// phospholipid biosynthetic process /// membrane /// integral to membrane /// transferase activity /// triglyceride biosynthetic process /// regulation of TOR signaling pathway
7927146	-0.64884	0.637793	8.70038	-6.36552	3.69471e-06	0.000399424	4.44183	CSGALNACT2	chondroitin sulfate N-acetylgalactosaminyltransferase 2	Golgi apparatus /// acetylgalactosaminyltransferase activity /// membrane /// integral to membrane /// transferase activity /// proteoglycan biosynthetic process /// integral to Golgi membrane /// Golgi cisterna membrane /// metal ion binding /// glucuronylgalactosylproteoglycan 4-beta-N-acetylgalactosaminyltransferase activity /// chondroitin sulfate proteoglycan biosynthetic process /// dermata…
7952445	-0.653091	0.635917	9.64822	-6.64001	2.07933e-06	0.000245516	5.01365	C11orf61	chromosome 11 open reading frame 61	---
7938485	-0.653827	0.635592	10.8672	-5.43026	2.81223e-05	0.00227811	2.42328	MICAL2	microtubule associated monoxygenase, calponin and LIM domain containing 2	monooxygenase activity /// cytoplasm /// cytoskeleton /// zinc ion binding /// metal ion binding /// oxidation reduction /// metabolic process
7996341	-0.655201	0.634987	9.39776	-6.07266	6.89649e-06	0.000691664	3.8209	PDP2	pyruvate dehyrogenase phosphatase catalytic subunit 2	magnesium-dependent protein serine/threonine phosphatase activity /// [pyruvate dehydrogenase (lipoamide)] phosphatase activity /// mitochondrion /// mitochondrial matrix /// protein amino acid dephosphorylation /// protein serine/threonine phosphatase complex /// hydrolase activity /// metal ion binding /// magnesium ion binding /// protein serine/threonine phosphatase activity /// manganese ion…
8107194	-0.655315	0.634937	9.47748	-5.35525	3.32384e-05	0.00261641	2.25725	C5orf30	chromosome 5 open reading frame 30	---
7911017	-0.658588	0.633498	9.67455	-6.86473	1.30847e-06	0.000171734	5.47422	SDCCAG8	serologically defined colon cancer antigen 8	cytoplasm /// centrosome /// cytosol /// cytoskeleton
8161488	-0.666127	0.630196	7.24927	-4.8801	9.70356e-05	0.00638536	1.19458	AQP7 /// AQP7P2 /// AQP7P1	aquaporin 7 /// aquaporin 7 pseudogene 2 /// aquaporin 7 pseudogene 1	transporter activity /// cytoplasm /// plasma membrane /// integral to plasma membrane /// cell-cell junction /// generation of precursor metabolites and energy /// water transport /// spermatogenesis /// excretion /// water channel activity /// glycerol channel activity /// urea channel activity /// glycerol transport /// urea transport /// ribonucleoprotein complex /// brush border membrane ///…
7963092	-0.66644	0.63006	9.13987	-5.42812	2.82565e-05	0.00227811	2.41855	FMNL3	formin-like 3	actin binding /// protein binding /// cellular component organization /// actin cytoskeleton organization /// Rho GTPase binding
7954559	-0.680481	0.623957	10.2028	-5.32582	3.54971e-05	0.00274872	2.19195	PPFIBP1	PTPRF interacting protein, binding protein 1 (liprin beta 1)	protein binding /// plasma membrane /// cell adhesion
8036045	-0.684341	0.62229	6.30463	-5.33478	3.47933e-05	0.0027079	2.21184	ZNF792	zinc finger protein 792	DNA binding /// intracellular /// nucleus /// regulation of transcription, DNA-dependent /// zinc ion binding /// metal ion binding
8155442	-0.685903	0.621617	7.26085	-5.0956	5.95392e-05	0.00422703	1.67867	AQP7 /// AQP7P2 /// AQP7P1	aquaporin 7 /// aquaporin 7 pseudogene 2 /// aquaporin 7 pseudogene 1	transporter activity /// cytoplasm /// plasma membrane /// integral to plasma membrane /// cell-cell junction /// generation of precursor metabolites and energy /// water transport /// spermatogenesis /// excretion /// water channel activity /// glycerol channel activity /// urea channel activity /// glycerol transport /// urea transport /// ribonucleoprotein complex /// brush border membrane ///…
8040113	-0.688607	0.620452	10.1943	-7.12496	7.71778e-07	0.00011271	5.99883	ASAP2	ArfGAP with SH3 domain, ankyrin repeat and PH domain 2	protein binding /// cytoplasm /// Golgi apparatus /// plasma membrane /// enzyme activator activity /// ARF GTPase activator activity /// zinc ion binding /// regulation of ARF GTPase activity /// Golgi cisterna membrane /// metal ion binding
8106210	-0.70373	0.613983	9.08352	-5.61921	1.8508e-05	0.00159653	2.83905	RGNEF /// RGNEF	Rho-guanine nucleotide exchange factor /// 190 kDa guanine nucleotide exchange factor	RNA binding /// guanyl-nucleotide exchange factor activity /// Rho guanyl-nucleotide exchange factor activity /// intracellular /// cytoplasm /// plasma membrane /// cell differentiation /// regulation of Rho protein signal transduction /// metal ion binding /// intracellular signaling cascade /// zinc ion binding /// diacylglycerol binding
8156826	-0.708555	0.611933	9.94293	-4.93097	8.64389e-05	0.00576785	1.30912	TGFBR1	transforming growth factor, beta receptor 1	nucleotide binding /// activation of MAPKK activity /// skeletal system development /// response to hypoxia /// in utero embryonic development /// kidney development /// blastocyst development /// protein serine/threonine kinase activity /// transmembrane receptor protein serine/threonine kinase activity /// receptor activity /// transforming growth factor beta receptor activity /// transforming …
8145281	-0.710083	0.611285	10.7219	-9.0505	2.05513e-08	5.26383e-06	9.58432	SLC25A37	solute carrier family 25, member 37	iron ion transmembrane transporter activity /// binding /// mitochondrion /// mitochondrial inner membrane /// ion transport /// membrane /// integral to membrane /// mitochondrial iron ion transport /// transmembrane transport /// iron ion binding /// iron ion transport
7992293	-0.71503	0.609193	10.5939	-7.07691	8.50227e-07	0.000122026	5.90266	TMEM204	transmembrane protein 204	plasma membrane /// adherens junction /// response to stress /// integral to membrane /// cell junction
7944722	-0.717694	0.608069	10.061	-6.93211	1.14031e-06	0.000156269	5.61095	UBASH3B /// UBASH3B	ubiquitin associated and SH3 domain containing, B /// ubiquitin associated and SH3 domain containing B	nucleus /// cytoplasm
8080911	-0.731464	0.602292	7.25174	-4.90389	9.19252e-05	0.00608516	1.24816	KBTBD8	kelch repeat and BTB (POZ) domain containing 8	protein binding
8044584	-0.740674	0.598459	8.0252	-5.50093	2.40382e-05	0.00200261	2.5792	PSD4	pleckstrin and Sec7 domain containing 4	ARF guanyl-nucleotide exchange factor activity /// intracellular /// plasma membrane /// regulation of ARF protein signal transduction
8060758	-0.74682	0.595916	12.3216	-5.67604	1.63326e-05	0.00145408	2.96337	PRNP	prion protein	copper ion binding /// protein binding /// cytoplasm /// endoplasmic reticulum /// Golgi apparatus /// plasma membrane /// cellular copper ion homeostasis /// anti-apoptosis /// response to oxidative stress /// microtubule binding /// metabolic process /// tubulin binding /// extrinsic to membrane /// anchored to membrane /// identical protein binding /// membrane raft /// response to cadmium ion…
7965359	-0.75273	0.59348	10.6897	-7.06081	8.78298e-07	0.000125514	5.87039	ATP2B1	ATPase, Ca++ transporting, plasma membrane 1	nucleotide binding /// calcium-transporting ATPase activity /// calmodulin binding /// ATP binding /// plasma membrane /// integral to plasma membrane /// ATP biosynthetic process /// transport /// cation transport /// calcium ion transport /// metabolic process /// hydrolase activity /// hydrolase activity, acting on acid anhydrides, catalyzing transmembrane movement of substances /// metal ion …
8080487	-0.753895	0.593001	9.67196	-7.55621	3.28315e-07	5.41919e-05	6.84723	PRKCD	protein kinase C, delta	nucleotide binding /// calcium-independent protein kinase C activity /// protein binding /// ATP binding /// nucleus /// cytoplasm /// cytosol /// plasma membrane /// protein amino acid phosphorylation /// signal transduction /// protein C-terminus binding /// enzyme activator activity /// senescence /// regulation of receptor activity /// immunoglobulin mediated immune response /// transferase a…
7956759	-0.760185	0.590421	10.2359	-4.66611	0.000158164	0.00923926	0.711212	SRGAP1	SLIT-ROBO Rho GTPase activating protein 1	GTPase activator activity /// protein binding /// intracellular /// signal transduction
7961365	-0.760573	0.590262	5.85784	-6.49244	2.82887e-06	0.000315027	4.70747	MANSC1	MANSC domain containing 1	membrane /// integral to membrane
7939237	-0.765476	0.588259	8.38395	-6.23658	4.85655e-06	0.000510121	4.1698	C11orf41	chromosome 11 open reading frame 41	nucleus /// cytoplasm /// membrane /// integral to membrane /// intracellular membrane-bounded organelle
8063923	-0.76646	0.587858	9.82161	-7.27754	5.68736e-07	8.56887e-05	6.30201	SLCO4A1	solute carrier organic anion transporter family, member 4A1	transporter activity /// ion transport /// membrane /// integral to membrane /// thyroid hormone transmembrane transporter activity /// thyroid hormone metabolic process
7930927	-0.769276	0.586712	8.91766	-6.49485	2.81461e-06	0.00031449	4.71249	INPP5F	inositol polyphosphate-5-phosphatase F	hydrolase activity
8091411	-0.770288	0.5863	12.8301	-10.6204	1.50346e-09	5.62479e-07	12.1383	TM4SF1	transmembrane 4 L six family member 1	molecular_function /// integral to plasma membrane /// biological_process /// membrane
7931353	-0.771017	0.586004	8.98335	-6.83157	1.40045e-06	0.000182151	5.40668	PTPRE	protein tyrosine phosphatase, receptor type, E	transmembrane receptor protein tyrosine phosphatase activity /// protein binding /// cytoplasm /// plasma membrane /// protein amino acid phosphorylation /// protein amino acid dephosphorylation /// transmembrane receptor protein tyrosine phosphatase signaling pathway /// integral to membrane /// hydrolase activity /// protein homodimerization activity /// negative regulation of insulin receptor …
8113214	-0.772557	0.585379	10.0869	-4.81537	0.000112451	0.00707441	1.04861	GLRX	glutaredoxin (thioltransferase)	cytoplasm /// cytosol /// transport /// electron carrier activity /// protein disulfide oxidoreductase activity /// glutathione disulfide oxidoreductase activity /// electron transport chain /// cell redox homeostasis /// protein N-terminus binding
7963280	-0.774603	0.58455	10.9765	-5.17796	4.94537e-05	0.00358749	1.8628	SMAGP /// SMAGP	small trans-membrane and glycosylated protein /// small cell adhesion glycoprotein	plasma membrane /// integral to membrane /// cytoplasmic vesicle membrane /// cytoplasmic vesicle
8036351	-0.783606	0.580913	9.02341	-6.43626	3.18297e-06	0.00034978	4.59015	ZNF850P /// ZNF850P	zinc finger protein 850 pseudogene /// zinc finger protein 850 (pseudogene)	DNA binding /// intracellular /// nucleus /// regulation of transcription, DNA-dependent /// zinc ion binding /// metal ion binding
8081219	-0.783651	0.580895	8.9732	-4.74508	0.000132023	0.00805123	0.889841	ST3GAL6	ST3 beta-galactoside alpha-2,3-sialyltransferase 6	Golgi membrane /// Golgi apparatus /// amino sugar metabolic process /// protein amino acid glycosylation /// glycolipid metabolic process /// sialyltransferase activity /// protein lipoylation /// membrane /// integral to membrane /// integral to Golgi membrane /// sialyltransferase activity /// integral to membrane
7986601	-0.785287	0.580237	8.66758	-6.16397	5.67038e-06	0.000579161	4.01566	LOC401805	hypothetical gene supported by NM_144726	---
7986739	-0.785287	0.580237	8.66758	-6.16397	5.67038e-06	0.000579161	4.01566	LOC401805	hypothetical gene supported by NM_144726	---
8007363	-0.791835	0.577609	8.55522	-5.91834	9.62338e-06	0.000915514	3.48944	WNK4	WNK lysine deficient protein kinase 4	nucleotide binding /// protein serine/threonine kinase activity /// protein binding /// ATP binding /// cytoplasm /// tight junction /// protein amino acid phosphorylation /// ion transport /// chloride transport /// intracellular protein kinase cascade /// protein localization /// transferase activity /// cell junction /// regulation of cellular process /// protein kinase cascade
8140113	-0.795515	0.576138	8.054	-4.66214	0.000159609	0.00930738	0.702219	STX1A	syntaxin 1A (brain)	SNARE binding /// glycoprotein binding /// positive regulation of neurotransmitter secretion /// SNAP receptor activity /// protein binding /// extracellular region /// plasma membrane /// neurotransmitter transport /// intracellular protein transport /// synaptic transmission /// response to gravity /// integral to membrane /// synaptic vesicle docking during exocytosis /// myosin binding /// ca…
7994541	-0.798894	0.57479	9.54642	-5.18146	4.90654e-05	0.0035671	1.87062	LAT /// SPNS1	linker for activation of T cells /// spinster homolog 1 (Drosophila)	immunological synapse /// SH3/SH2 adaptor activity /// protein binding /// plasma membrane /// immune response /// integrin-mediated signaling pathway /// Ras protein signal transduction /// integral to membrane /// calcium-mediated signaling /// mast cell degranulation /// membrane raft /// regulation of T cell activation /// mitochondrion /// mitochondrial inner membrane /// lipid transport ///…
8130598	-0.798923	0.574778	7.39995	-4.76167	0.000127111	0.00782329	0.927352	LPAL2	lipoprotein, Lp(a)-like 2 pseudogene	molecular_function /// cellular_component /// extracellular region /// biological_process
8108217	-0.799035	0.574734	8.18286	-6.61799	2.17667e-06	0.000254304	4.96815	TGFBI	transforming growth factor, beta-induced, 68kDa	integrin binding /// protein binding /// extracellular region /// proteinaceous extracellular matrix /// extracellular space /// negative regulation of cell adhesion /// visual perception /// cell proliferation /// extracellular matrix organization /// extracellular matrix binding /// response to stimulus /// extracellular space /// visual perception
8083092	-0.809168	0.570711	11.4937	-7.97191	1.47484e-07	2.65447e-05	7.6401	ZBTB38	zinc finger and BTB domain containing 38	transcription factor activity /// protein binding /// intracellular /// nucleus /// nucleus /// zinc ion binding /// regulation of transcription /// positive regulation of transcription from RNA polymerase II promoter /// metal ion binding
7932796	-0.821723	0.565766	7.69886	-5.57462	2.04213e-05	0.00174351	2.74126	SVIL	supervillin	podosome /// nucleus /// cytoplasm /// plasma membrane /// cytoskeleton organization /// skeletal muscle tissue development /// actin cytoskeleton /// cell projection /// costamere /// actin filament binding /// calcium ion binding
7936115	-0.823843	0.564935	7.74761	-4.87084	9.91018e-05	0.00647979	1.17372	SH3PXD2A	SH3 and PX domains 2A	podosome /// protein binding /// cytoplasm /// cell communication /// phosphoinositide binding /// cell projection /// protein binding
7915392	-0.8255	0.564287	7.5666	-5.74768	1.39578e-05	0.00126981	3.11961	HIVEP3	human immunodeficiency virus type I enhancer binding protein 3	DNA binding /// intracellular /// nucleus /// cytoplasm /// zinc ion binding /// transcription activator activity /// positive regulation of transcription /// metal ion binding
8142230	-0.840052	0.558624	7.33938	-4.9289	8.68467e-05	0.00578347	1.30446	---	---	---
8135363	-0.861714	0.550298	8.20078	-5.55206	2.14652e-05	0.00182329	2.69171	PIK3CG	phosphoinositide-3-kinase, catalytic, gamma polypeptide	nucleotide binding /// inositol or phosphatidylinositol kinase activity /// protein binding /// ATP binding /// cytosol /// phosphoinositide 3-kinase complex /// protein amino acid phosphorylation /// G-protein coupled receptor protein signaling pathway /// 1-phosphatidylinositol-3-kinase activity /// transferase activity /// phosphotransferase activity, alcohol group as acceptor /// negative reg…
7903393	-0.870279	0.547041	7.75381	-5.70056	1.54765e-05	0.00138527	3.0169	S1PR1	sphingosine-1-phosphate receptor 1	lysosphingolipid and lysophosphatidic acid receptor activity /// receptor activity /// G-protein coupled receptor activity /// plasma membrane /// cell adhesion /// signal transduction /// G-protein coupled receptor protein signaling pathway /// integral to membrane /// angiogenesis /// G-protein coupled receptor activity /// plasma membrane /// G-protein coupled receptor protein signaling pathwa…
8049657	-0.874804	0.545328	9.56162	-5.39127	3.06729e-05	0.00243383	2.33703	ASB1	ankyrin repeat and SOCS box-containing 1	molecular_function /// intracellular /// multicellular organismal development /// male genitalia development /// negative regulation of cytokine biosynthetic process /// intracellular signaling cascade /// modification-dependent protein catabolic process
8152617	-0.877598	0.544273	6.20449	-5.97686	8.47821e-06	0.000827856	3.61548	HAS2	hyaluronan synthase 2	integral to plasma membrane /// membrane /// integral to membrane /// hyaluronan synthase activity /// transferase activity, transferring glycosyl groups
7960850	-0.879488	0.54356	8.05053	-5.39088	3.06997e-05	0.00243383	2.33617	SLC2A14	solute carrier family 2 (facilitated glucose transporter), member 14	transporter activity /// glucose transmembrane transporter activity /// cytoplasm /// plasma membrane /// multicellular organismal development /// spermatogenesis /// carbohydrate transport /// integral to membrane /// substrate-specific transmembrane transporter activity /// cell differentiation /// transmembrane transport
7933469	-0.880871	0.54304	7.91787	-7.33925	5.03126e-07	7.75582e-05	6.42369	ARHGAP22	Rho GTPase activating protein 22	angiogenesis /// GTPase activator activity /// intracellular /// nucleus /// cytoplasm /// signal transduction /// multicellular organismal development /// cell differentiation /// regulation of transcription
7954469	-0.881243	0.5429	9.70214	-6.21038	5.13534e-06	0.000532683	4.11426	RASSF8	Ras association (RalGDS/AF-6) domain family (N-terminal) member 8	signal transduction
8061247	-0.885743	0.541209	9.20707	-6.08574	6.70525e-06	0.000674516	3.84888	RIN2	Ras and Rab interactor 2	small GTPase regulator activity /// GTPase activator activity /// protein binding /// cellular_component /// cytoplasm /// endocytosis /// signal transduction /// small GTPase mediated signal transduction /// Rab guanyl-nucleotide exchange factor activity
7918657	-0.888542	0.54016	8.99426	-5.7481	1.39449e-05	0.00126981	3.12053	PTPN22	protein tyrosine phosphatase, non-receptor type 22 (lymphoid)	protein tyrosine phosphatase activity /// protein binding /// cytoplasm /// protein amino acid dephosphorylation /// signal transduction /// hydrolase activity /// T cell differentiation /// negative regulation of T cell receptor signaling pathway /// protein tyrosine phosphatase activity /// protein amino acid dephosphorylation
8016438	-0.893783	0.538201	9.93264	-10.8934	9.81202e-10	4.11416e-07	12.5514	HOXB2	homeobox B2	morphogenesis of an epithelial sheet /// transcription factor activity /// nucleus /// regulation of transcription, DNA-dependent /// multicellular organismal development /// blood circulation /// anterior/posterior pattern formation /// dorsal/ventral pattern formation /// rhombomere 3 development /// rhombomere 4 development /// facial nerve structural organization /// sequence-specific DNA bin…
8026564	-0.893783	0.538201	9.19605	-6.86415	1.31004e-06	0.000171734	5.47302	KLF2	Kruppel-like factor 2 (lung)	transcription factor activity /// protein binding /// intracellular /// nucleus /// zinc ion binding /// transcription activator activity /// positive regulation of transcription /// metal ion binding
8171248	-0.896115	0.537332	8.78514	-5.98245	8.37635e-06	0.000820316	3.6275	KAL1	Kallmann syndrome 1 sequence	serine-type endopeptidase inhibitor activity /// extracellular matrix structural constituent /// protein binding /// extracellular region /// proteinaceous extracellular matrix /// extracellular space /// cellular component movement /// chemotaxis /// cell adhesion /// axon guidance /// cell surface /// peptidase inhibitor activity /// cell adhesion
7896701	-0.907773	0.533007	9.00327	-6.34427	3.8645e-06	0.000415085	4.39713	---	---	---
8076792	-0.908204	0.532848	9.81078	-7.41479	4.33331e-07	6.90364e-05	6.57191	CERK	ceramide kinase	nucleotide binding /// magnesium ion binding /// integral to membrane of membrane fraction /// ceramide kinase activity /// diacylglycerol kinase activity /// ATP binding /// nucleus /// cytoplasm /// ceramide metabolic process /// activation of protein kinase C activity by G-protein coupled receptor protein signaling pathway /// membrane /// transferase activity /// calcium ion binding /// cytop…
7929012	-0.908363	0.532789	9.60665	-6.75454	1.64074e-06	0.0002044	5.24923	STAMBPL1	STAM binding protein-like 1	ubiquitin thiolesterase activity /// peptidase activity /// metallopeptidase activity /// metal ion binding /// zinc ion binding /// modification-dependent protein catabolic process
7965671	-0.922169	0.527715	6.36623	-5.36464	3.25493e-05	0.00257433	2.27805	---	---	---
8100382	-0.923966	0.527058	10.5942	-6.00954	7.90048e-06	0.000782923	3.68569	CHIC2	cysteine-rich hydrophobic domain 2	molecular_function /// protein binding /// cellular_component /// Golgi apparatus /// Golgi-associated vesicle /// plasma membrane /// biological_process /// cytoplasmic vesicle
7980233	-0.933971	0.523416	8.42918	-4.97774	7.77332e-05	0.00523944	1.41431	PGF	placental growth factor	angiogenesis /// branching involved in ureteric bud morphogenesis /// response to hypoxia /// positive regulation of endothelial cell proliferation /// protein binding /// extracellular region /// extracellular space /// signal transduction /// cell-cell signaling /// multicellular organismal development /// female pregnancy /// growth factor activity /// heparin binding /// positive regulation o…
8005243	-0.937657	0.52208	6.13366	-5.05551	6.5184e-05	0.00456939	1.58884	---	---	---
8172270	-0.943032	0.520139	9.54413	-5.75644	1.36928e-05	0.00125255	3.13867	---	---	---
8092073	-0.9433	0.520042	9.12633	-7.61316	2.93818e-07	4.99146e-05	6.95731	EIF5A2	eukaryotic translation initiation factor 5A2	RNA binding /// translation elongation factor activity /// protein binding /// cellular_component /// nucleus /// nuclear pore /// cytoplasm /// endoplasmic reticulum /// endoplasmic reticulum membrane /// cytosol /// translation /// translational frameshifting /// spermatogenesis /// positive regulation of cell proliferation /// peptidyl-lysine modification to hypusine /// polyamine homeostasis …
7994280	-0.954245	0.516111	9.00791	-7.72066	2.3856e-07	4.0945e-05	7.16382	IL4R	interleukin 4 receptor	receptor activity /// interleukin-4 receptor activity /// receptor signaling protein activity /// protein binding /// extracellular region /// plasma membrane /// integral to plasma membrane /// immune response /// signal transduction /// insulin receptor substrate binding /// negative regulation of T-helper 1 cell differentiation /// positive regulation of T-helper 2 cell differentiation /// imm…
7942123	-0.961142	0.51365	11.3335	-5.64198	1.76029e-05	0.00153838	2.8889	CCND1	cyclin D1	G1/S transition of mitotic cell cycle /// G1/S transition of mitotic cell cycle /// cyclin-dependent protein kinase holoenzyme complex /// re-entry into mitotic cell cycle /// liver development /// positive regulation of protein amino acid phosphorylation /// protein kinase activity /// protein binding /// intracellular /// nucleus /// nucleoplasm /// cytoplasm /// cytosol /// response to DNA dam…
7965652	-0.961612	0.513483	10.4024	-5.21703	4.52957e-05	0.00334415	1.94995	PCTK2 /// CDK17	PCTAIRE protein kinase 2 /// cyclin-dependent kinase 17	nucleotide binding /// protein kinase activity /// cyclin-dependent protein kinase activity /// ATP binding /// protein amino acid phosphorylation /// transferase activity /// protein amino acid phosphorylation
8145291	-0.966586	0.511715	10.2488	-5.20993	4.6024e-05	0.00338291	1.93412	SLC25A37	solute carrier family 25, member 37	iron ion transmembrane transporter activity /// binding /// mitochondrion /// mitochondrial inner membrane /// ion transport /// membrane /// integral to membrane /// mitochondrial iron ion transport /// transmembrane transport /// iron ion binding /// iron ion transport
8149551	-0.97264	0.509573	9.17236	-4.72701	0.000137589	0.00834482	0.848997	PSD3	pleckstrin and Sec7 domain containing 3	ARF guanyl-nucleotide exchange factor activity /// intracellular /// membrane fraction /// plasma membrane /// postsynaptic density /// cell junction /// regulation of ARF protein signal transduction /// synapse /// postsynaptic membrane
7928705	-0.974989	0.508744	10.3625	-10.5335	1.725e-09	6.38193e-07	12.0049	TSPAN14	tetraspanin 14	membrane /// integral to membrane
8129677	-0.975346	0.508618	9.19395	-6.1419	5.94451e-06	0.000603458	3.96869	SGK1	serum/glucocorticoid regulated kinase 1	nucleotide binding /// protein serine/threonine kinase activity /// protein binding /// ATP binding /// nucleus /// cytoplasm /// endoplasmic reticulum /// plasma membrane /// protein amino acid phosphorylation /// sodium ion transport /// apoptosis /// response to stress /// transferase activity /// protein serine/threonine kinase activity /// protein amino acid phosphorylation /// response to s…
8157153	-0.977955	0.507699	9.07132	-8.79115	3.25649e-08	7.74511e-06	9.13147	AKAP2 /// PALM2-AKAP2 /// PALM2	A kinase (PRKA) anchor protein 2 /// PALM2-AKAP2 readthrough /// paralemmin 2	protein binding /// enzyme binding /// plasma membrane /// regulation of cell shape
7954589	-0.98986	0.503527	6.60372	-6.21444	5.09116e-06	0.000531412	4.12286	REP15	RAB15 effector protein	endosome /// membrane /// early endosome membrane
8142345	-1.00128	0.499555	10.0148	-6.52097	2.66485e-06	0.000299768	4.76688	DOCK4	dedicator of cytokinesis 4	guanyl-nucleotide exchange factor activity /// protein binding /// endomembrane system /// membrane /// SH3 domain binding /// PDZ domain binding /// Rac GTPase activator activity /// stereocilium /// stereocilium bundle /// Rac GTPase binding
8044499	-1.00344	0.498809	12.3788	-8.70535	3.79917e-08	8.8771e-06	8.97965	SLC20A1	solute carrier family 20 (phosphate transporter), member 1	signal transducer activity /// receptor activity /// inorganic phosphate transmembrane transporter activity /// high affinity inorganic phosphate:sodium symporter activity /// sodium:phosphate symporter activity /// integral to plasma membrane /// phosphate metabolic process /// transport /// sodium ion transport /// phosphate transport /// symporter activity /// membrane /// positive regulation …
8022761	-1.0126	0.495653	4.35942	-6.30373	4.21087e-06	0.000446526	4.31173	---	---	---
8174598	-1.01379	0.495242	6.43638	-4.64862	0.000164631	0.00953342	0.671605	IL13RA2	interleukin 13 receptor, alpha 2	signal transducer activity /// receptor activity /// cytokine receptor activity /// extracellular space /// soluble fraction /// membrane /// integral to membrane
7919751	-1.02367	0.491862	11.9722	-6.87959	1.2693e-06	0.000168232	5.50443	MCL1	myeloid cell leukemia sequence 1 (BCL2-related)	cell fate determination /// protein binding /// nucleus /// nucleoplasm /// cytoplasm /// mitochondrion /// mitochondrial outer membrane /// apoptosis /// anti-apoptosis /// multicellular organismal development /// protein channel activity /// membrane /// integral to membrane /// cellular homeostasis /// cell differentiation /// response to cytokine stimulus /// regulation of apoptosis /// prote…
7972946	-1.02726	0.490641	9.22421	-9.00308	2.2342e-08	5.6419e-06	9.5022	RASA3	RAS p21 protein activator 3	GTPase activator activity /// intracellular /// plasma membrane /// signal transduction /// calcium-release channel activity /// intrinsic to internal side of plasma membrane /// metal ion binding /// regulation of small GTPase mediated signal transduction /// GTPase activator activity /// intracellular signaling cascade /// zinc ion binding
8057929	-1.02902	0.490045	6.4101	-4.62296	0.000174603	0.00993806	0.613494	---	---	---
8133788	-1.03741	0.487203	10.6377	-10.2345	2.78556e-09	9.23884e-07	11.5393	PTPN12	protein tyrosine phosphatase, non-receptor type 12	non-membrane spanning protein tyrosine phosphatase activity /// protein binding /// soluble fraction /// cytoplasm /// cytosol /// protein amino acid dephosphorylation /// hydrolase activity /// SH3 domain binding /// cytoplasm /// protein amino acid dephosphorylation
8127502	-1.03991	0.486359	9.44654	-4.95695	8.14877e-05	0.00547036	1.36756	C6orf155	chromosome 6 open reading frame 155	---
7957665	-1.04027	0.486236	10.0758	-6.93205	1.14044e-06	0.000156269	5.61083	ELK3	ELK3, ETS-domain protein (SRF accessory protein 2)	angiogenesis /// transcription factor activity /// transcription corepressor activity /// protein binding /// nucleus /// nucleus /// nucleolus /// mitochondrion /// regulation of transcription, DNA-dependent /// signal transduction /// negative regulation of transcription /// purine-rich negative regulatory element binding /// wound healing /// intracellular membrane-bounded organelle /// transc…
8037374	-1.04168	0.485762	10.631	-6.91167	1.18884e-06	0.000162233	5.56953	PLAUR	plasminogen activator, urokinase receptor	receptor activity /// protein binding /// extracellular region /// plasma membrane /// cellular component movement /// chemotaxis /// signal transduction /// blood coagulation /// cell surface /// integral to membrane /// attachment of GPI anchor to protein /// extrinsic to membrane /// enzyme binding /// regulation of proteolysis /// U-plasminogen activator receptor activity /// anchored to memb…
8115732	-1.06144	0.479153	8.60946	-6.58273	2.34246e-06	0.000269886	4.89514	LOC100133106	VCEW9374	---
7972487	-1.06777	0.477057	9.88401	-9.63237	7.53983e-09	2.26175e-06	10.5676	DOCK9	dedicator of cytokinesis 9	guanyl-nucleotide exchange factor activity /// Rho guanyl-nucleotide exchange factor activity /// cellular_component /// biological_process /// endomembrane system /// membrane /// Rho GTPase binding /// GTP binding /// GTPase binding
8126798	-1.07701	0.474009	6.61386	-7.93718	1.57544e-07	2.8052e-05	7.57478	GPR116	G protein-coupled receptor 116	G-protein coupled receptor activity /// plasma membrane /// signal transduction /// G-protein coupled receptor protein signaling pathway /// neuropeptide signaling pathway /// integral to membrane /// G-protein coupled receptor activity /// integral to membrane
8131803	-1.0773	0.473916	6.62515	-4.86643	0.000100102	0.00649727	1.16377	IL6	interleukin 6 (interferon, beta 2)	neutrophil apoptosis /// hepatic immune response /// hepatic immune response /// neutrophil mediated immunity /// monocyte chemotaxis /// positive regulation of acute inflammatory response /// positive regulation of leukocyte chemotaxis /// cytokine activity /// cytokine activity /// interleukin-6 receptor binding /// interleukin-6 receptor binding /// extracellular region /// extracellular space…
7993889	-1.08028	0.472936	10.2705	-7.35786	4.84921e-07	7.50995e-05	6.46027	C16orf52	chromosome 16 open reading frame 52	---
7923991	-1.08281	0.472108	8.14946	-4.83378	0.000107831	0.00685199	1.09014	PLXNA2	plexin A2	receptor activity /// intracellular /// plasma membrane /// signal transduction /// cell surface receptor linked signaling pathway /// multicellular organismal development /// integral to membrane /// semaphorin receptor activity /// granule cell precursor tangential migration /// centrosome localization /// membrane
7957298	-1.09509	0.468108	9.47082	-6.20257	5.22161e-06	0.000538278	4.09769	NAV3	neuron navigator 3	nucleotide binding /// ATP binding /// nucleus /// nuclear envelope /// nuclear outer membrane /// membrane /// nucleoside-triphosphatase activity
8148710	-1.09835	0.467049	10.2906	-4.65372	0.000162716	0.00947193	0.683169	EXOSC4	exosome component 4	3'-5'-exoribonuclease activity /// exosome (RNase complex) /// RNA binding /// exonuclease activity /// protein binding /// nucleus /// nucleolus /// cytoplasm /// rRNA processing /// RNA processing /// hydrolase activity /// histone mRNA catabolic process
7906919	-1.10039	0.466391	9.98566	-5.33666	3.46475e-05	0.0027079	2.21601	RGS4	regulator of G-protein signaling 4	inactivation of MAPK activity /// signal transducer activity /// GTPase activator activity /// calmodulin binding /// regulation of G-protein coupled receptor protein signaling pathway /// negative regulation of signal transduction
7949264	-1.11099	0.462977	9.02194	-6.40696	3.38549e-06	0.000367188	4.52878	EHD1	EH-domain containing 1	nucleotide binding /// GTPase activity /// calcium ion binding /// protein binding /// ATP binding /// GTP binding /// lipid particle /// plasma membrane /// endocytosis /// positive regulation of cholesterol storage /// endosome transport /// endocytic vesicle /// platelet dense tubular network membrane /// early endosome membrane /// low-density lipoprotein particle clearance /// cholesterol ho…
8122265	-1.12598	0.458191	8.39165	-5.59317	1.96018e-05	0.00168217	2.78198	TNFAIP3	tumor necrosis factor, alpha-induced protein 3	DNA binding /// protein binding /// nucleus /// cytoplasm /// centrosome /// apoptosis /// anti-apoptosis /// peptidase activity /// cysteine-type peptidase activity /// zinc ion binding /// negative regulation of I-kappaB kinase/NF-kappaB cascade /// metal ion binding /// cytoplasm /// modification-dependent protein catabolic process
8180257	-1.13076	0.456676	11.4317	-5.45076	2.68695e-05	0.00220548	2.46856	---	---	---
8116418	-1.13312	0.455928	10.6758	-7.4917	3.72499e-07	6.1099e-05	6.72199	GFPT2	glutamine-fructose-6-phosphate transaminase 2	glutamine-fructose-6-phosphate transaminase (isomerizing) activity /// sugar binding /// cytoplasm /// fructose 6-phosphate metabolic process /// energy reserve metabolic process /// glutamine metabolic process /// metabolic process /// carbohydrate biosynthetic process /// transferase activity /// glutamine-fructose-6-phosphate transaminase (isomerizing) activity
7964733	-1.13549	0.45518	5.6234	-4.61772	0.000176713	0.0099919	0.601629	RPSAP52	ribosomal protein SA pseudogene 52	---
7914665	-1.14157	0.453267	7.31901	-6.70924	1.80155e-06	0.000221918	5.15626	---	---	---
7956867	-1.16639	0.445536	10.1815	-9.83976	5.32574e-09	1.67294e-06	10.9075	HMGA2	high mobility group AT-hook 2	chromatin /// DNA binding /// AT DNA binding /// protein binding /// nucleus /// chromosome /// chromatin organization /// regulation of transcription, DNA-dependent /// cell cycle /// mitosis /// multicellular organismal development /// regulation of growth /// cell division /// nuclear chromosome /// regulation of transcription, DNA-dependent
8081838	-1.16887	0.444768	8.89835	-7.00196	9.89398e-07	0.000140038	5.75203	CDGAP /// ARHGAP31	Cdc42 GTPase-activating protein /// Rho GTPase activating protein 31	GTPase activator activity /// protein binding /// intracellular /// focal adhesion /// signal transduction /// small GTPase mediated signal transduction /// SH3 domain binding /// lamellipodium /// cell junction
8096050	-1.1773	0.44218	8.97869	-5.36124	3.27977e-05	0.00258783	2.27051	FGF5	fibroblast growth factor 5	fibroblast growth factor receptor binding /// extracellular region /// extracellular space /// cell-cell signaling /// nervous system development /// growth factor activity /// cell proliferation /// positive regulation of cell proliferation /// positive regulation of cell proliferation /// fibroblast growth factor receptor signaling pathway /// fibroblast growth factor receptor signaling pathway…
8172268	-1.17788	0.442001	8.08089	-4.72593	0.00013793	0.00835026	0.846553	MIR222	microRNA 222	---
8112592	-1.18253	0.44058	9.82625	-5.64533	1.74734e-05	0.00153108	2.89624	FOXD1	forkhead box D1	DNA binding /// transcription factor activity /// nucleus /// regulation of transcription, DNA-dependent /// DNA bending activity /// positive regulation of gene expression /// positive regulation of BMP signaling pathway /// negative regulation of gene-specific transcription /// sequence-specific DNA binding /// dichotomous subdivision of terminal units involved in ureteric bud branching /// pos…
7958749	-1.18296	0.440447	9.83315	-5.82945	1.16749e-05	0.00108284	3.29723	SH2B3	SH2B adaptor protein 3	signal transducer activity /// protein binding /// cell differentiation /// embryonic hemopoiesis /// intracellular signaling cascade
7896719	-1.19512	0.436751	9.11298	-6.64795	2.04537e-06	0.000242365	5.03003	---	---	---
8063536	-1.20031	0.435183	8.4849	-6.65141	2.03073e-06	0.000241819	5.03718	TFAP2C	transcription factor AP-2 gamma (activating enhancer binding protein 2 gamma)	DNA binding /// transcription factor activity /// protein binding /// nucleus /// regulation of transcription from RNA polymerase II promoter /// cell-cell signaling /// cell differentiation /// protein dimerization activity /// transcription factor activity /// regulation of transcription from RNA polymerase II promoter
8028570	-1.20765	0.432973	7.74526	-9.81791	5.52318e-09	1.71874e-06	10.8719	PAPL	iron/zinc purple acid phosphatase-like protein	acid phosphatase activity /// extracellular region /// hydrolase activity /// metal ion binding /// iron ion binding /// zinc ion binding
8096032	-1.21003	0.43226	9.42171	-5.04942	6.60869e-05	0.0046132	1.5752	PRDM8	PR domain containing 8	DNA binding /// intracellular /// nucleus /// zinc ion binding /// neurogenesis /// regulation of transcription /// metal ion binding
8115490	-1.22946	0.426476	10.0115	-9.00246	2.23663e-08	5.6419e-06	9.50113	ADAM19	ADAM metallopeptidase domain 19 (meltrin beta)	metalloendopeptidase activity /// proteolysis /// peptidase activity /// zinc ion binding /// membrane /// integral to membrane /// SH3 domain binding /// metal ion binding
8097628	-1.22948	0.42647	9.57218	-10.4013	2.12942e-09	7.46351e-07	11.8004	HHIP	hedgehog interacting protein	catalytic activity /// protein binding /// extracellular region /// cytoplasm /// plasma membrane /// integral to plasma membrane /// signal transduction /// neuroblast proliferation /// organ morphogenesis /// dorsal/ventral pattern formation /// cell surface /// lung development /// regulation of fibroblast growth factor receptor signaling pathway /// negative regulation of smoothened signaling…
7941236	-1.23295	0.425445	9.2171	-8.09019	1.17947e-07	2.19402e-05	7.86121	CDC42EP2	CDC42 effector protein (Rho GTPase binding) 2	opioid peptide activity /// Rho GTPase activator activity /// protein binding /// cytoplasm /// cytoskeleton /// plasma membrane /// actin filament organization /// regulation of cell shape /// endomembrane system /// membrane /// GTP-Rho binding /// actin cytoskeleton organization /// positive regulation of actin filament polymerization /// positive regulation of pseudopodium assembly /// positi…
8075310	-1.23447	0.425	9.11665	-6.43275	3.20657e-06	0.000351215	4.5828	LIF /// MGC20647	leukemia inhibitory factor (cholinergic differentiation factor) /// hypothetical protein MGC20647	cytokine activity /// leukemia inhibitory factor receptor binding /// leukemia inhibitory factor receptor binding /// extracellular region /// extracellular space /// immune response /// multicellular organismal development /// embryo implantation /// growth factor activity /// positive regulation of cell proliferation /// stem cell maintenance /// organ regeneration /// positive regulation of pe…
8124848	-1.23772	0.424043	11.12	-5.30184	3.74533e-05	0.00286028	2.13869	IER3	immediate early response 3	protein binding /// apoptosis /// anti-apoptosis /// anatomical structure morphogenesis /// membrane /// integral to membrane
8179704	-1.23772	0.424043	11.12	-5.30184	3.74533e-05	0.00286028	2.13869	IER3	immediate early response 3	protein binding /// apoptosis /// anti-apoptosis /// anatomical structure morphogenesis /// membrane /// integral to membrane
8091422	-1.25108	0.420135	11.4727	-6.99363	1.00626e-06	0.000140779	5.73524	WWTR1	WW domain containing transcription regulator 1	negative regulation of transcription from RNA polymerase II promoter /// osteoblast differentiation /// transcription coactivator activity /// transcription corepressor activity /// protein binding /// nucleus /// nucleus /// transcription factor complex /// nucleolus /// cytoplasm /// regulation of transcription, DNA-dependent /// transcription regulator activity /// glomerulus development /// p…
7980152	-1.25516	0.418947	8.9363	-8.43053	6.26406e-08	1.2875e-05	8.48651	LTBP2	latent transforming growth factor beta binding protein 2	calcium ion binding /// protein binding /// extracellular region /// proteinaceous extracellular matrix /// protein targeting /// transforming growth factor beta receptor signaling pathway /// protein secretion /// growth factor binding
8017651	-1.26135	0.417153	11.4432	-11.7675	2.63431e-10	1.30917e-07	13.817	SMURF2	SMAD specific E3 ubiquitin protein ligase 2	ubiquitin ligase complex /// ubiquitin-protein ligase activity /// protein binding /// intracellular /// nucleus /// cytoplasm /// plasma membrane /// protein modification process /// ubiquitin-dependent protein catabolic process /// negative regulation of transcription /// ligase activity /// acid-amino acid ligase activity /// regulation of transforming growth factor beta receptor signaling pat…
8021376	-1.26253	0.416814	11.5135	-12.9344	5.09337e-11	3.33487e-08	15.3803	NEDD4L	neural precursor cell expressed, developmentally down-regulated 4-like	ubiquitin-protein ligase activity /// protein binding /// intracellular /// cytoplasm /// protein modification process /// sodium ion transport /// cellular sodium ion homeostasis /// excretion /// response to metal ion /// protein ubiquitination /// ligase activity /// acid-amino acid ligase activity /// sodium channel regulator activity /// water homeostasis /// regulation of protein catabolic …
8129562	-1.27508	0.413202	11.0582	-4.64943	0.000164323	0.00953219	0.673452	CTGF	connective tissue growth factor	cartilage condensation /// ossification /// angiogenesis /// regulation of cell growth /// integrin binding /// protein binding /// insulin-like growth factor binding /// extracellular region /// proteinaceous extracellular matrix /// plasma membrane /// DNA replication /// cell adhesion /// cell-matrix adhesion /// integrin-mediated signaling pathway /// growth factor activity /// heparin bindin…
8151512	-1.28347	0.410807	7.9353	-7.5559	3.2851e-07	5.41919e-05	6.84664	PAG1	phosphoprotein associated with glycosphingolipid microdomains 1	SH3/SH2 adaptor activity /// protein binding /// plasma membrane /// plasma membrane /// immune response /// signal transduction /// integral to membrane /// SH2 domain binding /// membrane raft /// regulation of T cell activation /// negative regulation of T cell activation /// intracellular signaling cascade
8037387	-1.29289	0.408132	7.63518	-7.22759	6.28298e-07	9.42361e-05	6.20311	---	---	---
8178435	-1.29653	0.407105	11.3945	-5.71752	1.49111e-05	0.00134188	3.05391	IER3	immediate early response 3	protein binding /// apoptosis /// anti-apoptosis /// anatomical structure morphogenesis /// membrane /// integral to membrane
7909503	-1.30429	0.40492	8.90767	-8.81778	3.10493e-08	7.43775e-06	9.1784	SERTAD4	SERTA domain containing 4	---
7914648	-1.30755	0.404005	9.04377	-5.31731	3.61794e-05	0.00278857	2.17305	PHC2	polyhomeotic homolog 2 (Drosophila)	DNA binding /// protein binding /// nucleus /// multicellular organismal development /// zinc ion binding /// identical protein binding /// metal ion binding
8172266	-1.30938	0.403495	8.7498	-4.81477	0.000112606	0.00707441	1.04725	MIR221	microRNA 221	---
7993588	-1.32278	0.399763	9.5182	-13.0726	4.22571e-11	2.8715e-08	15.5566	TMC7	transmembrane channel-like 7	membrane /// integral to membrane
8080994	-1.3237	0.399508	5.18003	-5.94638	9.05618e-06	0.000871513	3.54987	LOC285299 /// LOC651959 /// FRG2C	FSHD region gene 2 family, member C-like /// FSHD region gene 2-like /// FSHD region gene 2 family, member C	nucleus
7935660	-1.33516	0.396348	10.0716	-12.0115	1.84941e-10	9.62185e-08	14.1554	DNMBP	dynamin binding protein	guanyl-nucleotide exchange factor activity /// Rho guanyl-nucleotide exchange factor activity /// protein binding /// intracellular /// cytoplasm /// Golgi apparatus /// Golgi stack /// cytoskeleton /// cell junction /// regulation of Rho protein signal transduction /// synapse /// protein binding /// intracellular signaling cascade
7932132	-1.36872	0.387235	8.71028	-9.62293	7.66109e-09	2.27359e-06	10.552	FRMD4A	FERM domain containing 4A	binding /// cytoplasm /// cytoskeleton
8112615	-1.37095	0.386636	8.38829	-6.61537	2.1886e-06	0.000254804	4.96272	ENC1 /// ENC1	ectodermal-neural cortex (with BTB-like domain) /// ectodermal-neural cortex 1 (with BTB-like domain)	actin binding /// protein binding /// nucleus /// cytoplasm /// cytoskeleton /// multicellular organismal development /// nervous system development /// nuclear matrix /// nucleus /// multicellular organismal development /// modification-dependent protein catabolic process
7960865	-1.38463	0.382989	10.209	-7.58007	3.13377e-07	5.24348e-05	6.8934	SLC2A3	solute carrier family 2 (facilitated glucose transporter), member 3	transporter activity /// glucose transmembrane transporter activity /// cytoplasm /// plasma membrane /// plasma membrane /// carbohydrate metabolic process /// carbohydrate transport /// glucose transport /// integral to membrane /// substrate-specific transmembrane transporter activity /// transmembrane transport /// glucose transmembrane transporter activity
8054712	-1.43702	0.36933	8.72222	-5.74497	1.40408e-05	0.00127389	3.11371	IL1A	interleukin 1, alpha	fever /// cytokine activity /// interleukin-1 receptor binding /// copper ion binding /// protein binding /// extracellular region /// extracellular space /// extracellular space /// cytosol /// apoptosis /// anti-apoptosis /// inflammatory response /// immune response /// cell proliferation /// negative regulation of cell proliferation /// positive regulation vascular endothelial growth factor p…
8097098	-1.45149	0.365643	9.9516	-9.20837	1.55928e-08	4.22108e-06	9.85555	USP53	ubiquitin specific peptidase 53	ubiquitin thiolesterase activity /// cellular_component /// ubiquitin-dependent protein catabolic process /// biological_process
8022747	-1.47399	0.359986	9.86343	-10.46	1.93883e-09	7.01709e-07	11.8915	B4GALT6	UDP-Gal:betaGlcNAc beta 1,4- galactosyltransferase, polypeptide 6	Golgi apparatus /// carbohydrate metabolic process /// galactosyltransferase activity /// UDP-galactose:glucosylceramide beta-1,4-galactosyltransferase activity /// membrane /// integral to membrane /// transferase activity, transferring glycosyl groups /// Golgi cisterna membrane /// metal ion binding /// magnesium ion binding /// calcium ion binding /// manganese ion binding
8052872	-1.47891	0.358759	8.58649	-6.68717	1.88567e-06	0.000228317	5.11088	TGFA	transforming growth factor, alpha	activation of MAPK activity /// MAP kinase kinase activity /// signal transducer activity /// epidermal growth factor receptor binding /// protein binding /// extracellular region /// extracellular space /// plasma membrane /// growth factor activity /// cell proliferation /// cell surface /// integral to membrane /// positive regulation of epidermal growth factor receptor activity /// positive r…
7910022	-1.48396	0.357506	8.61859	-5.22212	4.4781e-05	0.00331349	1.9613	CNIH3	cornichon homolog 3 (Drosophila)	membrane /// integral to membrane /// intracellular signaling cascade
7933075	-1.50367	0.352656	9.36805	-8.91419	2.61489e-08	6.40207e-06	9.34745	FZD8	frizzled homolog 8 (Drosophila)	non-G-protein coupled 7TM receptor activity /// G-protein coupled receptor activity /// signal transduction /// G-protein coupled receptor protein signaling pathway /// multicellular organismal development /// membrane /// integral to membrane /// Wnt receptor signaling pathway /// Wnt-protein binding /// Wnt receptor activity
8101260	-1.51877	0.348982	11.0813	-9.0945	1.90233e-08	4.98756e-06	9.66025	ANTXR2	anthrax toxin receptor 2	receptor activity /// protein binding /// extracellular region /// endoplasmic reticulum /// endoplasmic reticulum membrane /// plasma membrane /// integral to membrane /// metal ion binding
8065569	-1.5238	0.347769	10.735	-11.6634	3.06891e-10	1.45979e-07	13.6707	BCL2L1	BCL2-like 1	ovarian follicle development /// response to hypoxia /// in utero embryonic development /// release of cytochrome c from mitochondria /// protein binding /// intracellular /// nucleus /// mitochondrion /// mitochondrial outer membrane /// mitochondrial outer membrane /// cytosol /// anti-apoptosis /// response to oxidative stress /// germ cell development /// spermatogenesis /// positive regulati…
7938746	-1.57586	0.335444	7.826	-8.6683	4.06187e-08	9.07704e-06	8.91377	MRGPRX4	MAS-related GPR, member X4	receptor activity /// G-protein coupled receptor activity /// plasma membrane /// signal transduction /// G-protein coupled receptor protein signaling pathway /// integral to membrane
7954090	-1.61472	0.326529	10.476	-5.89959	1.0023e-05	0.000948114	3.44897	EMP1	epithelial membrane protein 1	membrane fraction /// plasma membrane /// multicellular organismal development /// cell proliferation /// epidermis development /// integral to membrane /// cell growth /// epithelial cell differentiation /// membrane /// integral to membrane
7982564	-1.65288	0.318006	10.0229	-13.5443	2.26067e-11	1.60157e-08	16.1446	SPRED1	sprouty-related, EVH1 domain containing 1	inactivation of MAPK activity /// stem cell factor receptor binding /// protein binding /// nucleus /// plasma membrane /// caveola /// multicellular organismal development /// regulation of signal transduction
8052689	-1.71643	0.3043	9.74932	-9.56752	8.41444e-09	2.43631e-06	10.4602	SPRED2	sprouty-related, EVH1 domain containing 2	inactivation of MAPK activity /// stem cell factor receptor binding /// protein binding /// cytoplasm /// multicellular organismal development /// regulation of signal transduction /// membrane /// transport vesicle membrane /// cytoplasmic vesicle /// plasma membrane
7965357	-1.72348	0.302818	8.99874	-10.4177	2.0743e-09	7.34767e-07	11.8259	WDR51B /// POC1B /// GALNT4	WD repeat domain 51B /// POC1 centriolar protein homolog B (Chlamydomonas) /// UDP-N-acetyl-alpha-D-galactosamine:polypeptide N-acetylgalactosaminyltransferase 4 (GalNAc-T4)	Golgi membrane /// polypeptide N-acetylgalactosaminyltransferase activity /// sugar binding /// Golgi apparatus /// carbohydrate metabolic process /// membrane /// integral to membrane /// transferase activity, transferring glycosyl groups /// perinuclear region of cytoplasm
7912706	-1.72777	0.301919	9.95693	-6.6796	1.91547e-06	0.000231084	5.09529	EPHA2	EPH receptor A2	nucleotide binding /// angiogenesis /// transmembrane receptor protein tyrosine kinase activity /// receptor activity /// ephrin receptor activity /// protein binding /// ATP binding /// plasma membrane /// integral to plasma membrane /// protein amino acid phosphorylation /// apoptosis /// signal transduction /// multicellular organismal development /// transferase activity /// neuron differenti…
8063785	-1.74811	0.297691	7.09266	-5.83112	1.16325e-05	0.00108192	3.30084	C20orf197	chromosome 20 open reading frame 197	---
8122038	-1.75554	0.296161	8.30992	-11.7216	2.81758e-10	1.35967e-07	13.7526	TMEM200A	transmembrane protein 200A	membrane /// integral to membrane
8078350	-1.76524	0.294177	10.9959	-12.6711	7.30227e-11	4.34185e-08	15.0395	TGFBR2	transforming growth factor, beta receptor II (70/80kDa)	nucleotide binding /// blood vessel development /// patterning of blood vessels /// vasculogenesis /// positive regulation of mesenchymal cell proliferation /// positive regulation of tolerance induction to self antigen /// positive regulation of B cell tolerance induction /// positive regulation of T cell tolerance induction /// transmembrane receptor protein serine/threonine kinase activity ///…
7937251	-1.77616	0.291959	7.58065	-6.708	1.80616e-06	0.000221918	5.15372	LOC285299 /// FRG2B /// FRG2 /// FRG2C	FSHD region gene 2 family, member C-like /// FSHD region gene 2 family, member B /// FSHD region gene 2 /// FSHD region gene 2 family, member C	nucleus
7911178	-1.7891	0.289352	8.06213	-9.15487	1.71166e-08	4.54924e-06	9.76399	NLRP3	NLR family, pyrin domain containing 3	nucleotide binding /// protein binding /// ATP binding /// cytoplasm /// induction of apoptosis /// activation of caspase activity /// defense response /// inflammatory response /// signal transduction /// detection of biotic stimulus /// negative regulation of NF-kappaB transcription factor activity /// interleukin-18 production /// negative regulation of NF-kappaB import into nucleus /// peptid…
8054344	-1.80789	0.285608	6.19729	-9.16152	1.6919e-08	4.54316e-06	9.7754	hCG_1645516 /// RFX8	hypothetical protein LOC731220 /// regulatory factor X, 8	DNA binding /// regulation of transcription, DNA-dependent
7896709	-1.81977	0.283265	8.76643	-7.2862	5.59018e-07	8.46073e-05	6.31912	---	---	---
8150076	-1.82385	0.282466	8.7745	-8.01363	1.36276e-07	2.49317e-05	7.71831	DUSP4	dual specificity phosphatase 4	MAPKKK cascade /// protein tyrosine phosphatase activity /// nucleus /// nucleoplasm /// protein amino acid dephosphorylation /// protein tyrosine/threonine phosphatase activity /// response to organic substance /// hydrolase activity /// MAP kinase tyrosine/serine/threonine phosphatase activity /// protein tyrosine phosphatase activity /// nucleus /// protein amino acid dephosphorylation
8114991	-1.85539	0.276358	8.14555	-8.12339	1.10813e-07	2.11068e-05	7.92292	SH3TC2	SH3 domain and tetratricopeptide repeats 2	binding
8114572	-1.85797	0.275864	10.7951	-10.2308	2.80242e-09	9.23884e-07	11.5334	HBEGF	heparin-binding EGF-like growth factor	receptor activity /// epidermal growth factor receptor binding /// extracellular region /// extracellular space /// extracellular space /// extracellular space /// plasma membrane /// integral to plasma membrane /// integral to plasma membrane /// signal transduction /// epidermal growth factor receptor signaling pathway /// muscle organ development /// regulation of heart contraction /// growth …
8138289	-1.89037	0.269738	8.42799	-6.69805	1.84369e-06	0.000224049	5.13327	ETV1	ets variant 1	transcription factor activity /// nucleus /// regulation of transcription, DNA-dependent /// transcription from RNA polymerase II promoter /// sequence-specific DNA binding /// transcription factor activity
7924029	-1.90281	0.267422	10.6408	-7.36848	4.74836e-07	7.38813e-05	6.48113	LAMB3	laminin, beta 3	structural molecule activity /// protein binding /// extracellular region /// basement membrane /// cell adhesion /// epidermis development /// hemidesmosome assembly /// protein complex binding /// brown fat cell differentiation /// protein binding /// extracellular region
8104124	-1.90687	0.266671	7.51875	-7.43694	4.14819e-07	6.67258e-05	6.61523	LOC285299 /// FRG2B /// FRG2 /// FRG2C	FSHD region gene 2 family, member C-like /// FSHD region gene 2 family, member B /// FSHD region gene 2 /// FSHD region gene 2 family, member C	nucleus
8054722	-1.99127	0.251518	11.5623	-6.01078	7.87946e-06	0.000782923	3.68834	IL1B	interleukin 1, beta	activation of MAPK activity /// fever /// positive regulation of protein amino acid phosphorylation /// positive regulation of protein amino acid phosphorylation /// chronic inflammatory response to antigenic stimulus /// positive regulation of T cell mediated immunity /// cytokine activity /// cytokine activity /// interleukin-1 receptor binding /// protein binding /// extracellular region /// e…
7930413	-2.03516	0.24398	10.2821	-12.5289	8.8935e-11	5.0191e-08	14.8525	DUSP5	dual specificity phosphatase 5	protein tyrosine phosphatase activity /// nucleus /// protein amino acid dephosphorylation /// hydrolase activity /// MAP kinase tyrosine/serine/threonine phosphatase activity /// protein tyrosine phosphatase activity /// protein amino acid dephosphorylation
7990345	-2.08108	0.236337	9.61022	-9.28387	1.36788e-08	3.73331e-06	9.98407	SEMA7A	semaphorin 7A, GPI membrane anchor (John Milton Hagen blood group)	receptor activity /// protein binding /// plasma membrane /// immune response /// multicellular organismal development /// nervous system development /// cell differentiation /// anchored to membrane /// plasma membrane
8157524	-2.19799	0.217941	9.91166	-8.12282	1.10931e-07	2.11068e-05	7.92186	TLR4	toll-like receptor 4	lipopolysaccharide binding /// lipopolysaccharide binding /// lipopolysaccharide receptor activity /// toll-like receptor signaling pathway /// microglial cell activation during immune response /// production of nitric oxide involved in inflammatory response /// receptor activity /// transmembrane receptor activity /// protein binding /// cytoplasm /// plasma membrane /// plasma membrane /// inte…
7972217	-2.20839	0.216375	9.47467	-7.32592	5.16609e-07	7.92697e-05	6.39744	SPRY2	sprouty homolog 2 (Drosophila)	protein binding /// cytoplasm /// cytosol /// microtubule /// plasma membrane /// signal transduction /// cell-cell signaling /// multicellular organismal development /// sensory perception of sound /// organ morphogenesis /// regulation of signal transduction /// lung development /// inner ear morphogenesis /// negative regulation of MAP kinase activity /// cell fate commitment /// branching mor…
7928429	-2.21681	0.215117	10.4021	-7.90621	1.67113e-07	2.95976e-05	7.51641	C10orf55 /// PLAU	chromosome 10 open reading frame 55 /// plasminogen activator, urokinase	angiogenesis /// response to hypoxia /// serine-type endopeptidase activity /// extracellular region /// plasma membrane /// proteolysis /// chemotaxis /// signal transduction /// embryo implantation /// blood coagulation /// peptidase activity /// smooth muscle cell migration /// regulation of cell proliferation /// fibrinolysis /// skeletal muscle tissue regeneration /// proteolysis
8092578	-2.31002	0.201658	9.40233	-13.7706	1.68507e-11	1.21973e-08	16.4196	ETV5	ets variant 5	DNA binding /// transcription factor activity /// nucleus /// regulation of transcription, DNA-dependent /// promoter binding /// cellular response to oxidative stress /// transcription factor activity /// nucleus /// sequence-specific DNA binding
8083594	-2.38841	0.190993	9.16419	-9.73366	6.35848e-09	1.94237e-06	10.7343	PTX3 /// PTX3	pentraxin-related gene, rapidly induced by IL-1 beta /// pentraxin 3, long	zymosan binding /// response to yeast /// extracellular region /// inflammatory response /// opsonization /// positive regulation of nitric oxide biosynthetic process /// positive regulation of phagocytosis /// extracellular region
8095680	-2.85438	0.138275	8.25292	-10.4382	2.00753e-09	7.18762e-07	11.8577	IL8	interleukin 8	angiogenesis /// interleukin-8 receptor binding /// protein binding /// extracellular region /// extracellular space /// cellular component movement /// chemotaxis /// inflammatory response /// immune response /// cell cycle arrest /// signal transduction /// G-protein coupled receptor protein signaling pathway /// chemokine activity /// negative regulation of cell proliferation /// calcium-media…
8112045	-3.57718	0.0837841	8.50609	-10.7633	1.20135e-09	4.76205e-07	12.3556	ESM1	endothelial cell-specific molecule 1	regulation of cell growth /// insulin-like growth factor binding /// extracellular region /// growth factor activity /// biological_process /// protein binding
8114797	-3.61898	0.0813917	8.24433	-17.5999	1.98669e-13	4.37539e-10	20.4589	SPRY4	sprouty homolog 4 (Drosophila)	protein binding /// cytoplasm /// plasma membrane /// multicellular organismal development /// regulation of signal transduction /// ruffle membrane /// cell projection /// negative regulation of MAP kinase activity

## Sheet: HGNC
ADAM19
ADAMTS9
ADAR
AGPAT9
AHNAK
AIM1
AIM2
AKAP12
ALPK1
ANKFY1
ANKH
ANKRD5
ANTXR2
AOAH
APOBEC3F
APOBEC3G
APOL1
APOL2
APOL3
APOL6
APOLD1
AQP7
ARHGAP22
ARHGAP31
ARID5B
ARL14
ARRDC3
ASAP2
ASB1
ATF3
ATOH8
ATP10D
ATP2B1
B3GNT5
B4GALT6
BATF2
BCL2
BCL2L1
BMF
BST2
BTC
BTN3A1
BTN3A2
BTN3A3
C10orf119
C10orf47
C11orf41
C11orf61
C13orf27
C14orf159
C16orf52
C19orf28
C19orf66
C1D
C1orf26
C1R
C1S
C20orf197
C21orf81
C2orf67
C4orf34
C5orf13
C5orf30
C5orf56
C6orf155
CALCOCO2
CAMKK1
CARD17
CASP10
CASP7
CCDC144NL
CCDC77
CCND1
CD109
CD47
CD5L
CDC42EP2
CDH18
CDK15
CDK17
CDKN1B
CEP170
CERK
CHIC2
CHST2
CLTCL1
CMPK2
CNIH3
CNP
CPT1B
CSGALNACT2
CTGF
CXCL10
CXCL11
CYP2J2
CYTH1
DACT1
DBP
DDIT4
DDX58
DDX60
DDX60L
DHRS9
DHX58
DNAJB4
DNAJC6
DNMBP
DNPEP
DOCK10
DOCK4
DOCK9
DTX3L
DUSP10
DUSP16
DUSP4
DUSP5
EAPP
EFR3A
EHD1
EIF2AK2
EIF2B2
EIF2C2
EIF5A2
ELF1
ELK3
EMP1
ENC1
EPHA2
ERVWE2
ESM1
ETV1
ETV5
EXOSC4
FAM122C
FAM126A
FAM43A
FAM46A
FAM55C
FAM5B
FAM76A
FBLIM1
FBXO15
FBXO32
FBXW10
FGF5
FLT3LG
FMNL3
FMO5
FMR1
FOXD1
FRG2
FRMD4A
FTSJD2
FUT8
FZD7
FZD8
GALT
GBP1
GBP2
GBP3
GBP4
GBP5
GCA
GFPT2
GIMAP2
GLRX
GLT8D2
GMPR
GPBP1
GPR116
GTPBP2
HAS2
HBEGF
HDAC6
HDX
HERC5
HERC6
HFE
HHIP
HHIPL2
HIST2H4A
HIVEP3
HLA-A
HLA-B
HLA-C
HLA-DOB
HLA-E
HLA-G
HLA-H
HLA-J
HLA-L
HMG20B
HMGA2
HOXB2
HRH1
HSPA1A
HSPA1B
ID2
ID3
IDO1
IER3
IFFO2
IFI16
IFI27
IFI30
IFI35
IFI44
IFI44L
IFI6
IFIH1
IFIT1
IFIT2
IFIT3
IFIT5
IFITM1
IFITM3
IL13RA2
IL15
IL15RA
IL1A
IL1B
IL22RA1
IL4R
IL6
IL7
IL8
ING2
INPP5F
IRF9
ISG15
ISG20
JAG1
KAL1
KBTBD8
KIAA1217
KIF13A
KLF2
KMO
LAMB3
LAP3
LAT
LGALS3BP
LGALS9
LGMN
LIF
LIPA
LNPEP
LPXN
LRRTM2
LTBP2
LY6E
LYST
MACF1
MAGEB2
MAK
MALT1
MAMLD1
MANSC1
MAP2
MARS2
MASTL
MBNL2
MCL1
MCTP1
MDFI
MICAL2
MID1
MIR221
MIR222
MIR24-1
MIR27B
MIR922
MKL1
MMP13
MMP7
MOBKL2C
MOV10
MOXD1
MRGPRX4
MX1
MX2
MYO10
MYO18B
N4BP1
NAV3
NCRNA00152
NEDD4L
NET1
NFIL3
NLRC5
NLRP3
NMI
NR3C1
NUB1
NUMB
OAS1
OAS2
OAS3
OASL
OGFR
OTUD7B
PAG1
PALLD
PALM2
PARP10
PARP12
PARP14
PARP9
PDGFRL
PDP2
PDZD2
PER1
PGF
PHACTR4
PHC2
PHF11
PHF15
PHLDB2
PIK3CG
PIK3R3
PLAU
PLAUR
PLSCR1
PLXNA2
PML
PNPT1
PODXL
PPARD
PPFIBP1
PPM1F
PPM1K
PRDM8
PRKAG2
PRKCD
PRKD2
PRNP
PSD3
PSD4
PSMB8
PSMB9
PSME1
PTPN12
PTPN22
PTPRE
PTX3
PXK
RASA3
RASA4
RASGRP3
RASSF8
RBM43
RBMS1
RELN
REP15
RFTN1
RFX8
RGMB
RGS4
RIN2
RNF115
RNF122
RNF152
RNF19B
RNF213
ROBO4
RPS6KC1
RPSAP52
RSAD2
RTP4
S100A16
S1PR1
SAMD9
SAMD9L
SAMHD1
SCARB2
SDCCAG8
SEMA7A
SERTAD3
SERTAD4
SGK1
SH2B3
SH3PXD2A
SH3TC2
SHANK1
SHOX2
SIDT1
SLC12A8
SLC15A3
SLC16A4
SLC20A1
SLC25A28
SLC25A37
SLC2A12
SLC2A14
SLC2A3
SLC30A4
SLC35E4
SLC41A2
SLC6A9
SLCO4A1
SLFN5
SMAD6
SMAD9
SMAGP
SMURF2
SNAI1
SOCS2
SP100
SP110
SP140L
SPRED1
SPRED2
SPRY2
SPRY4
SPTLC3
SRGAP1
ST3GAL6
STAMBPL1
STARD13
STARD4
STARD5
STAT1
STAT2
STK17B
STX17
STX1A
SVIL
SYNPO2
TAP1
TAP2
TAPBP
TBC1D2B
TBC1D3
TDRD7
TFAP2C
TGFA
TGFB3
TGFBI
TGFBR1
TGFBR2
TLCD1
TLE4
TLK2
TLR3
TLR4
TM4SF1
TMC7
TMEM106A
TMEM110
TMEM140
TMEM200A
TMEM204
TMEM229B
TMEM62
TNFAIP3
TNFSF10
TNFSF13B
TRAFD1
TRANK1
TRIM14
TRIM21
TRIM22
TRIM25
TRIM26
TRIM34
TRIM38
TRIM5
TRIM56
TSPAN14
TTC39B
UBA7
UBASH3B
UBE2L6
UHRF2
UNC13C
USP18
USP53
VAMP1
VNN1
WDR25
WHAMM
WNK4
WWTR1
XAF1
XRN1
ZBTB38
ZCCHC2
ZFYVE26
ZHX3
ZKSCAN3
ZNF323
ZNF436
ZNF792
ZNFX1
